# Supplementary material for: Challenges in Defining a Reference Set of Differentially Expressed lncRNAs in Ulcerative Colitis by Meta-Analysis
Source: MDPI journal article supplement (doi:10.3390/cimb46040198), 2024-04-05

GSE107499

CDKN2B-AS1

3.2e-06

color

Lesional  
Non-lesional

UC\_Lesional

UC\_Non-lesional

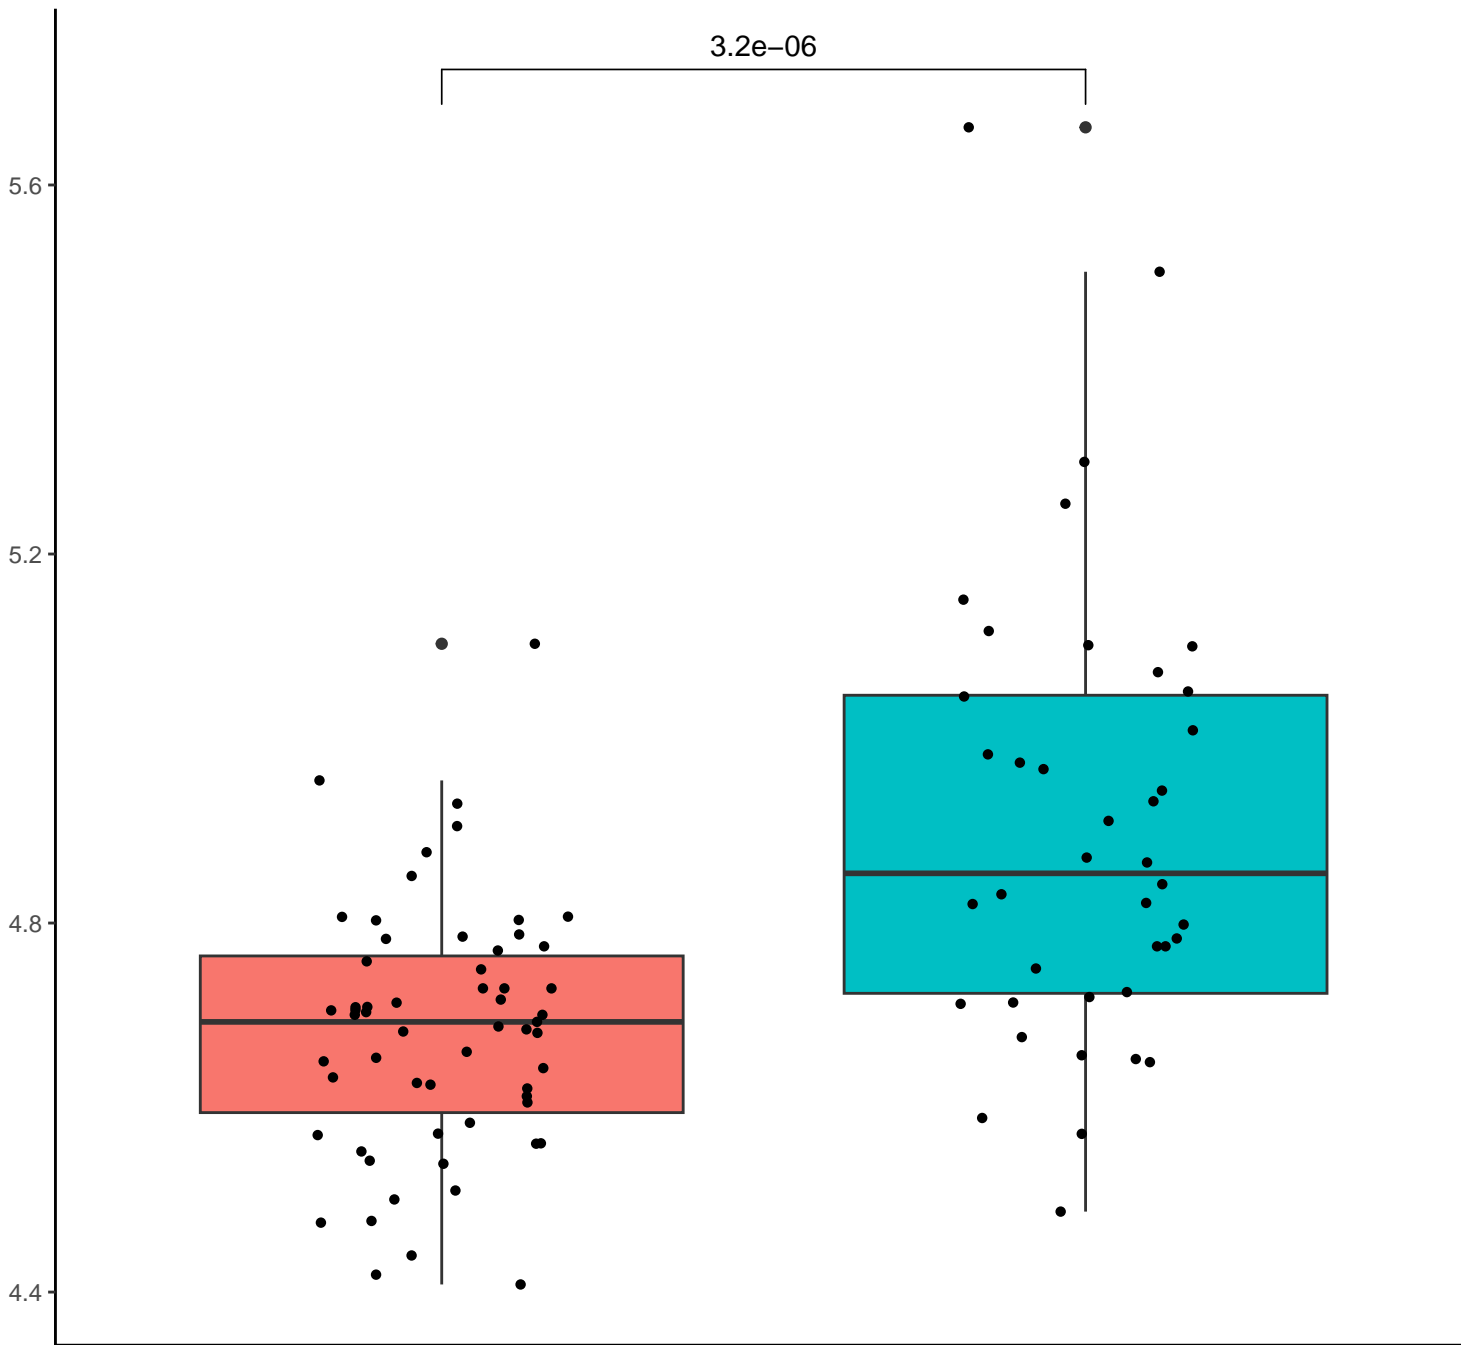

GSE109142

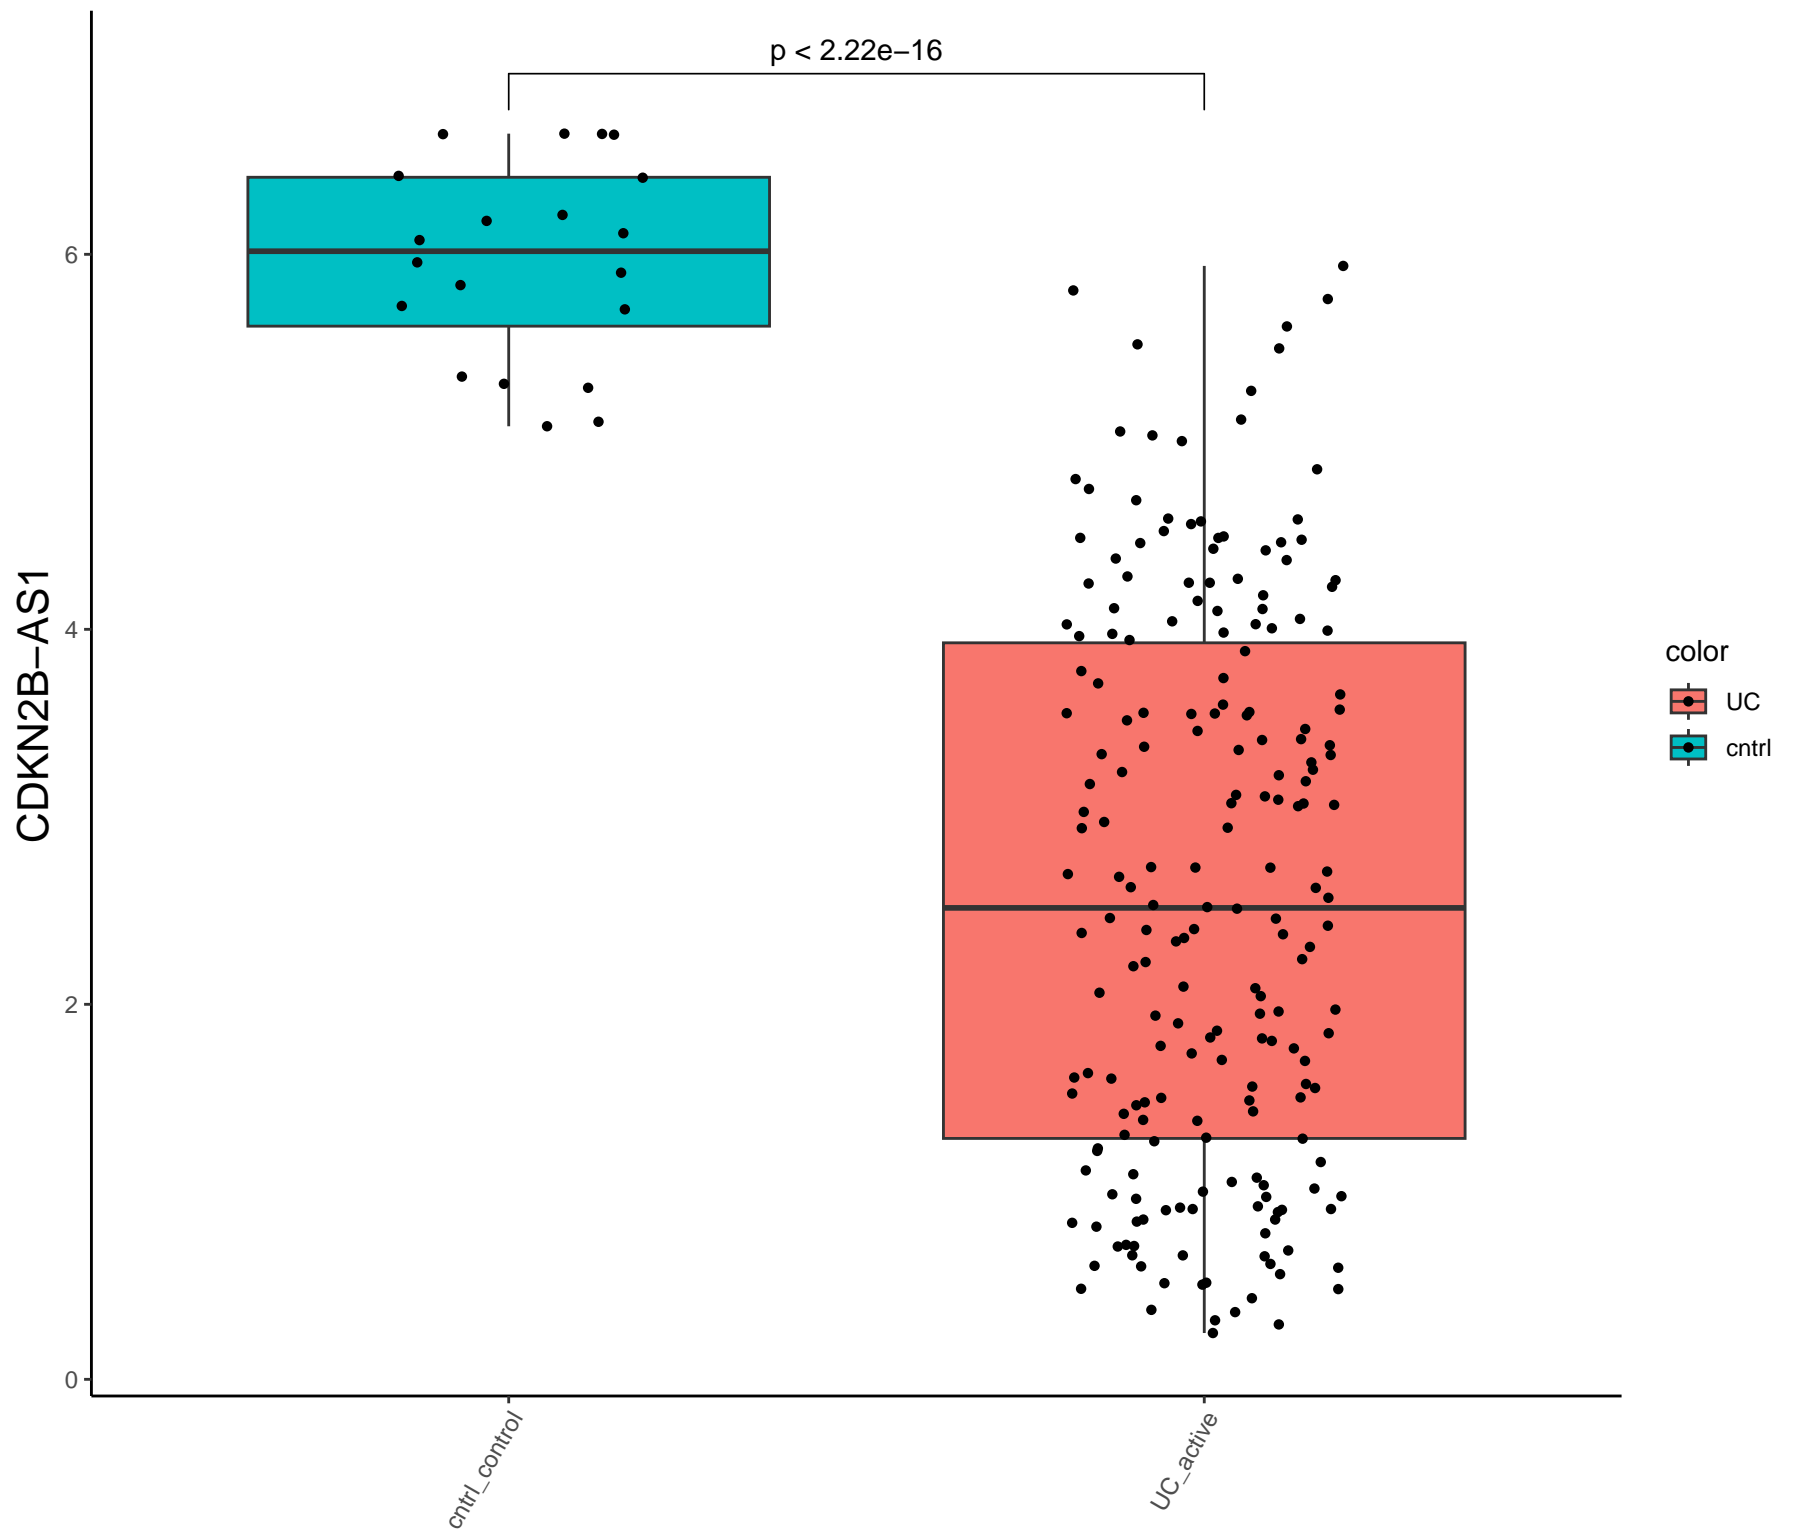

GSE128682

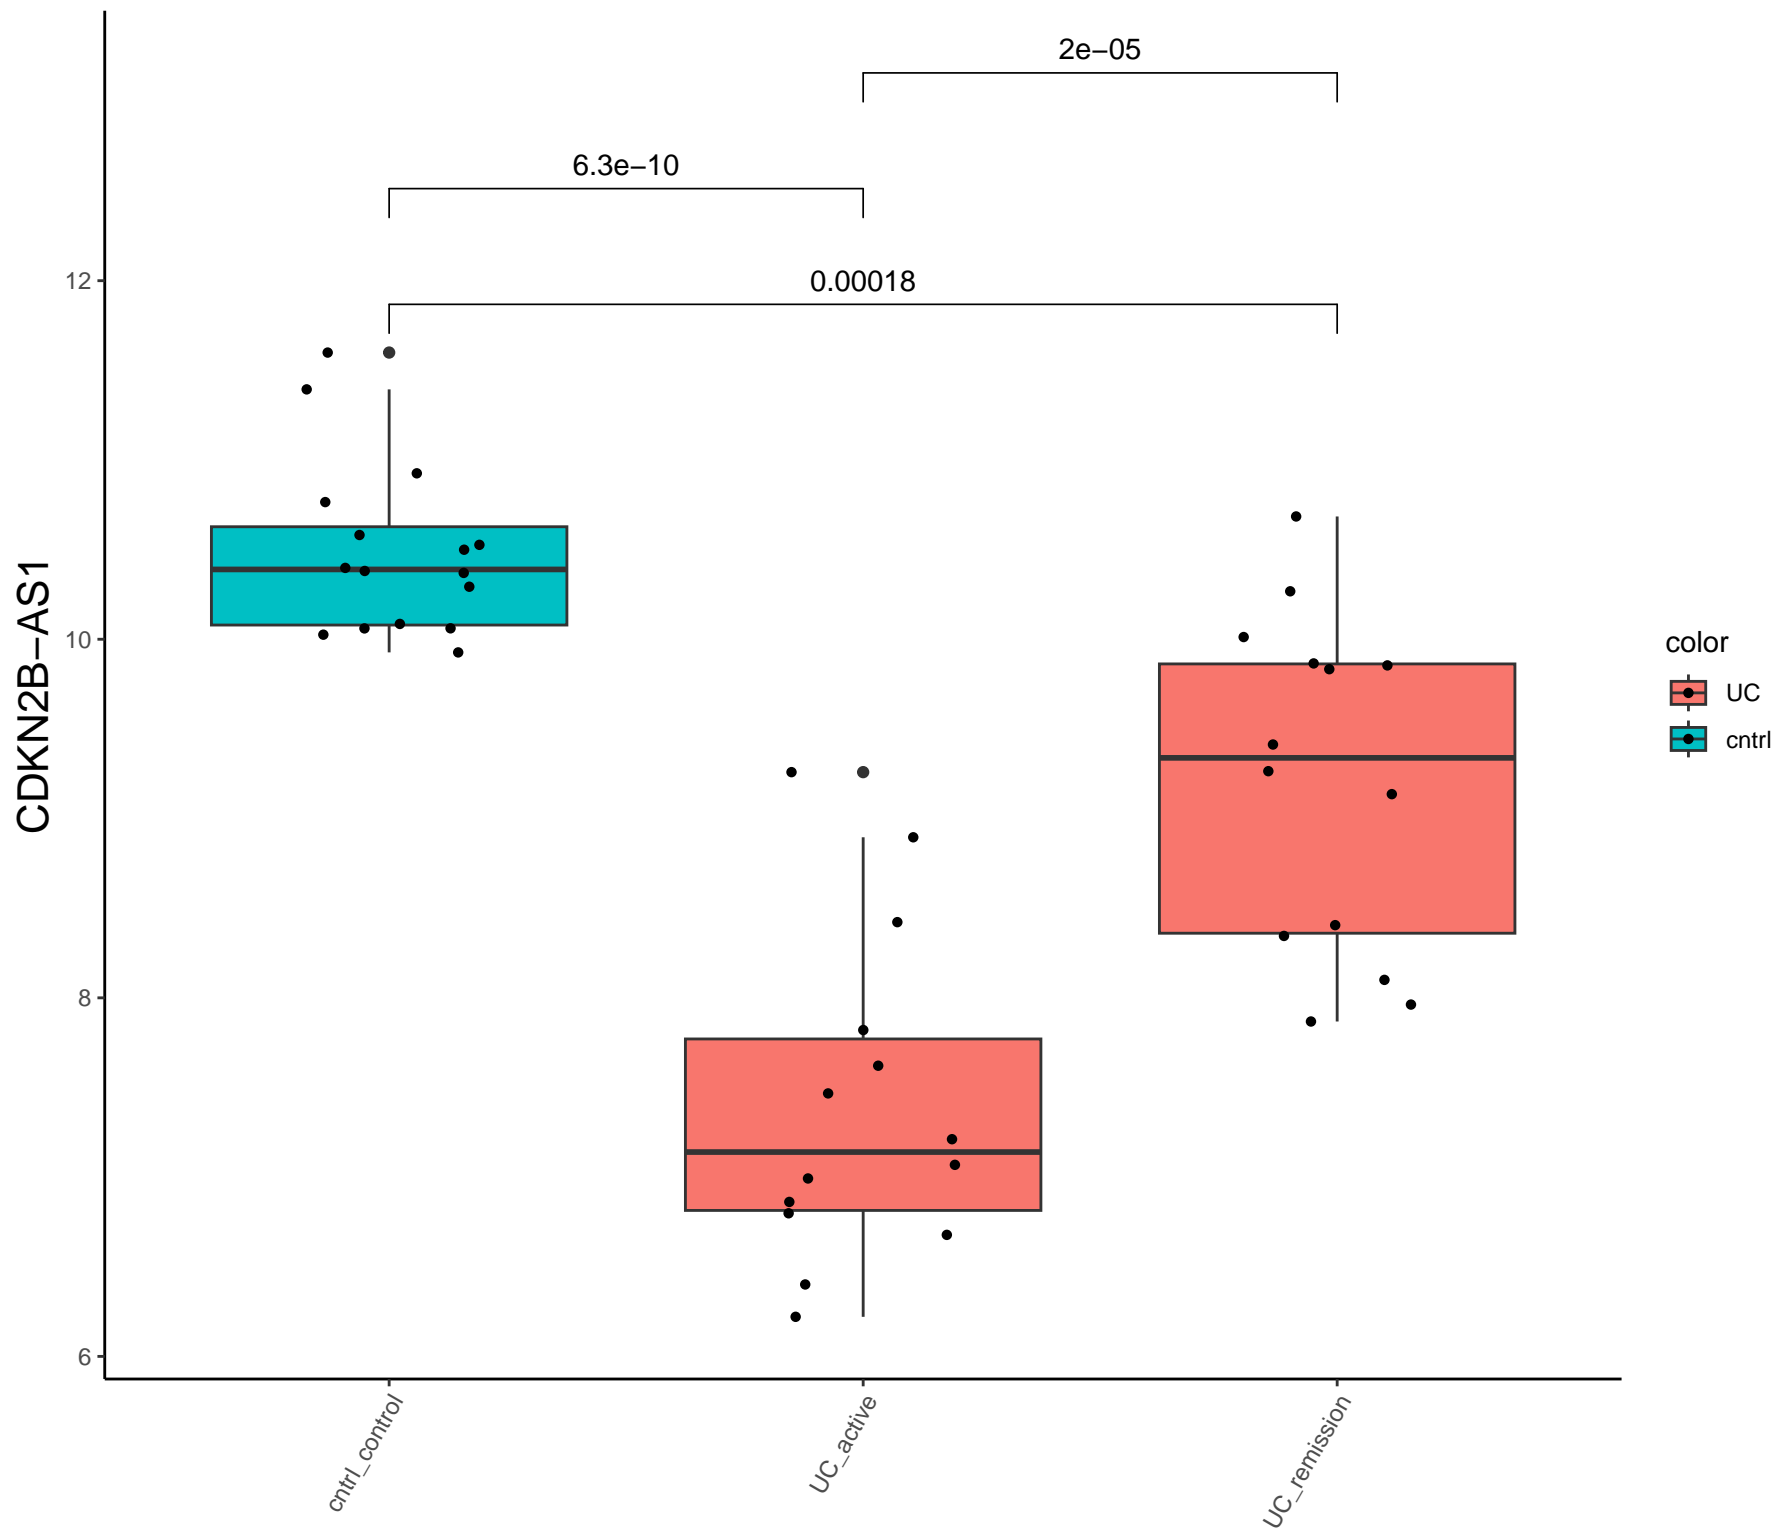

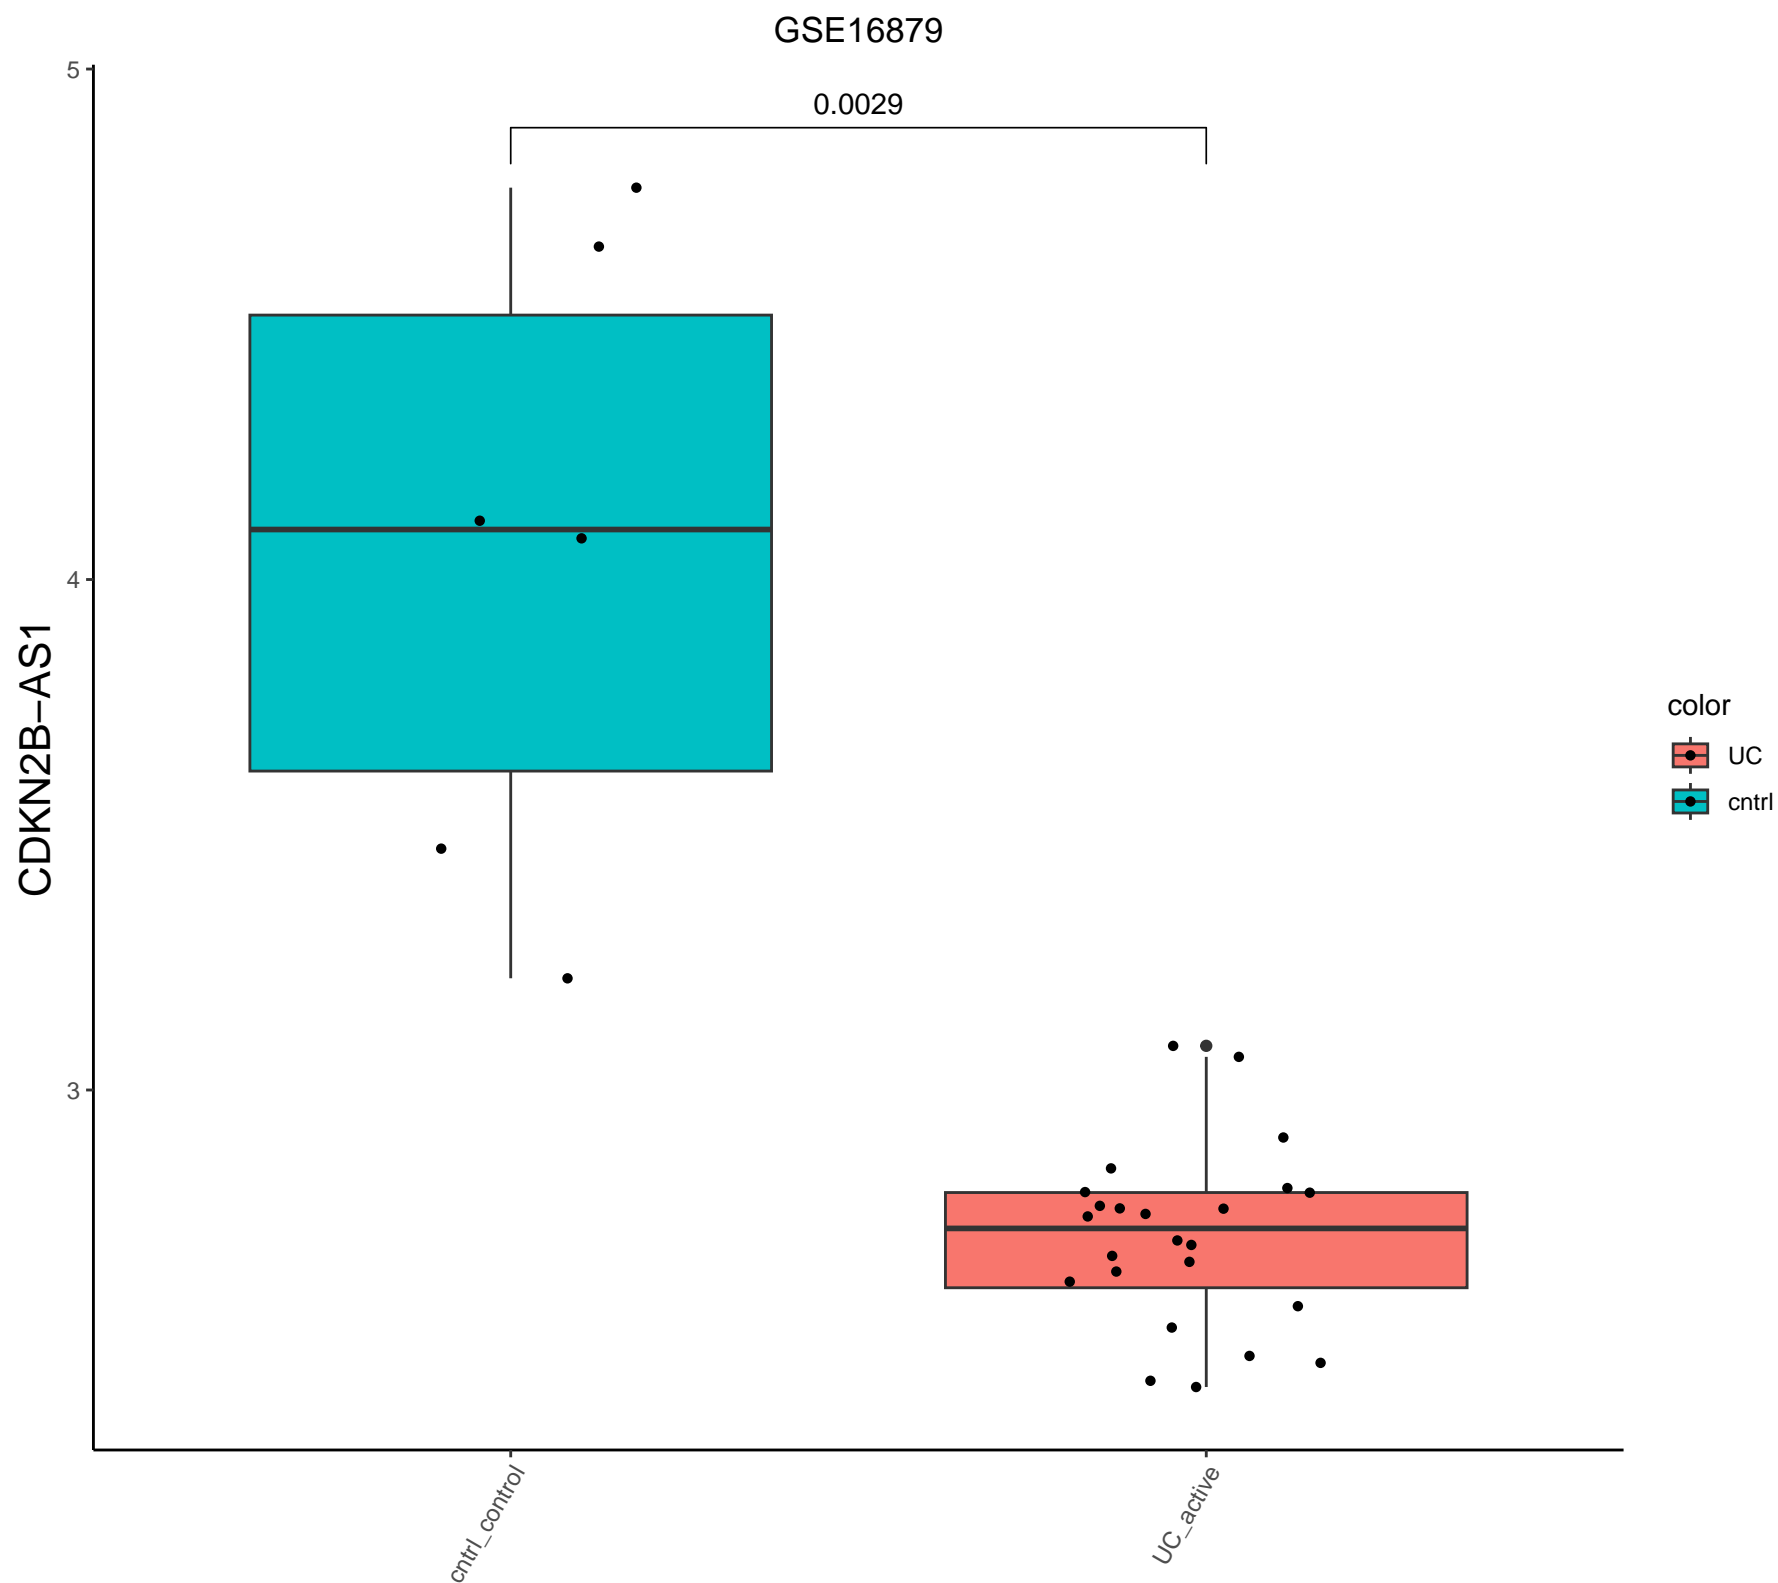

GSE206285

CDKN2B-AS1

$3.5e-10$

color

- UC
- cntrl

cntrl\_control

UC\_active

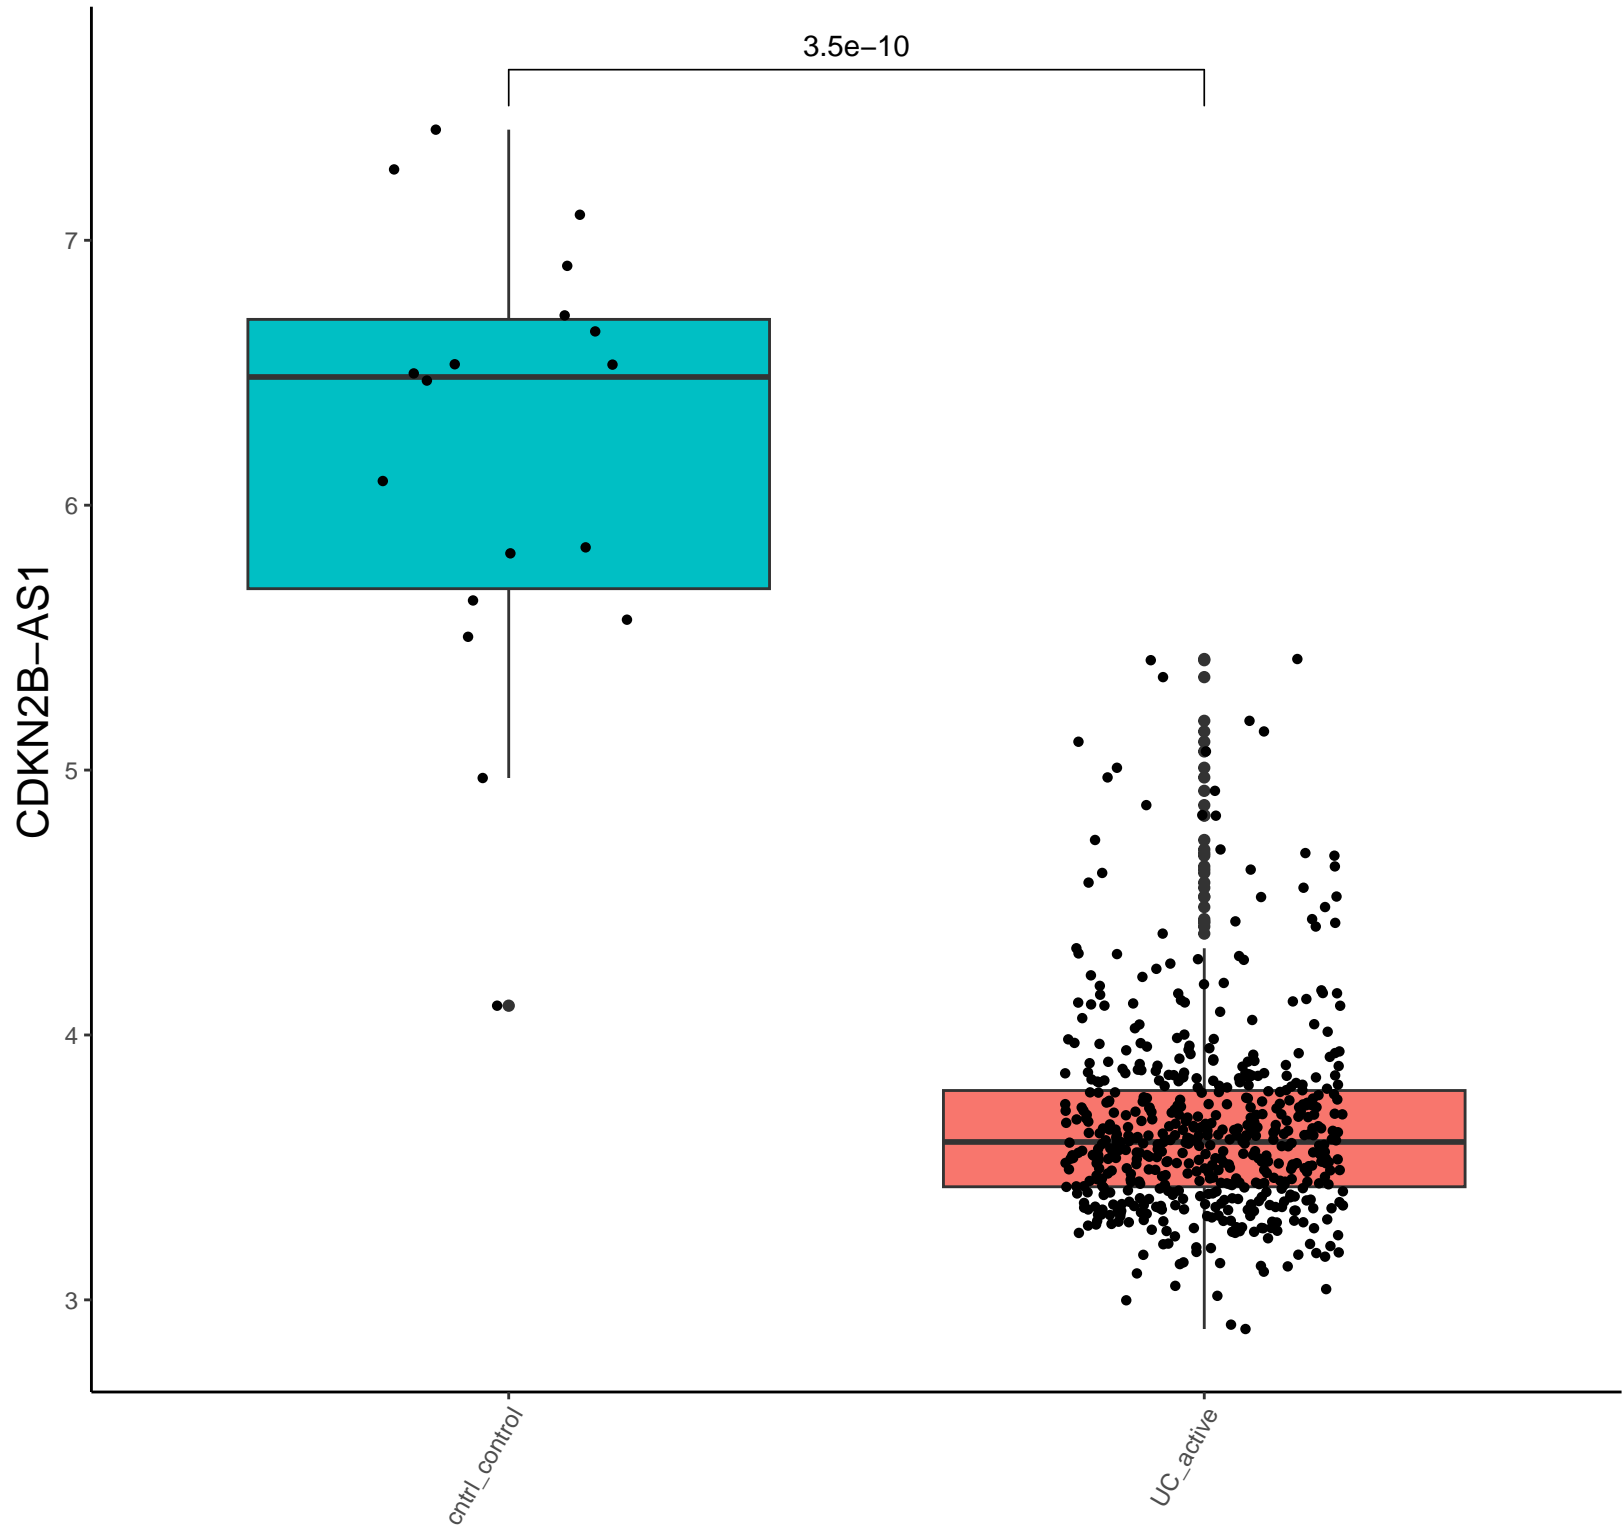

GSE47908

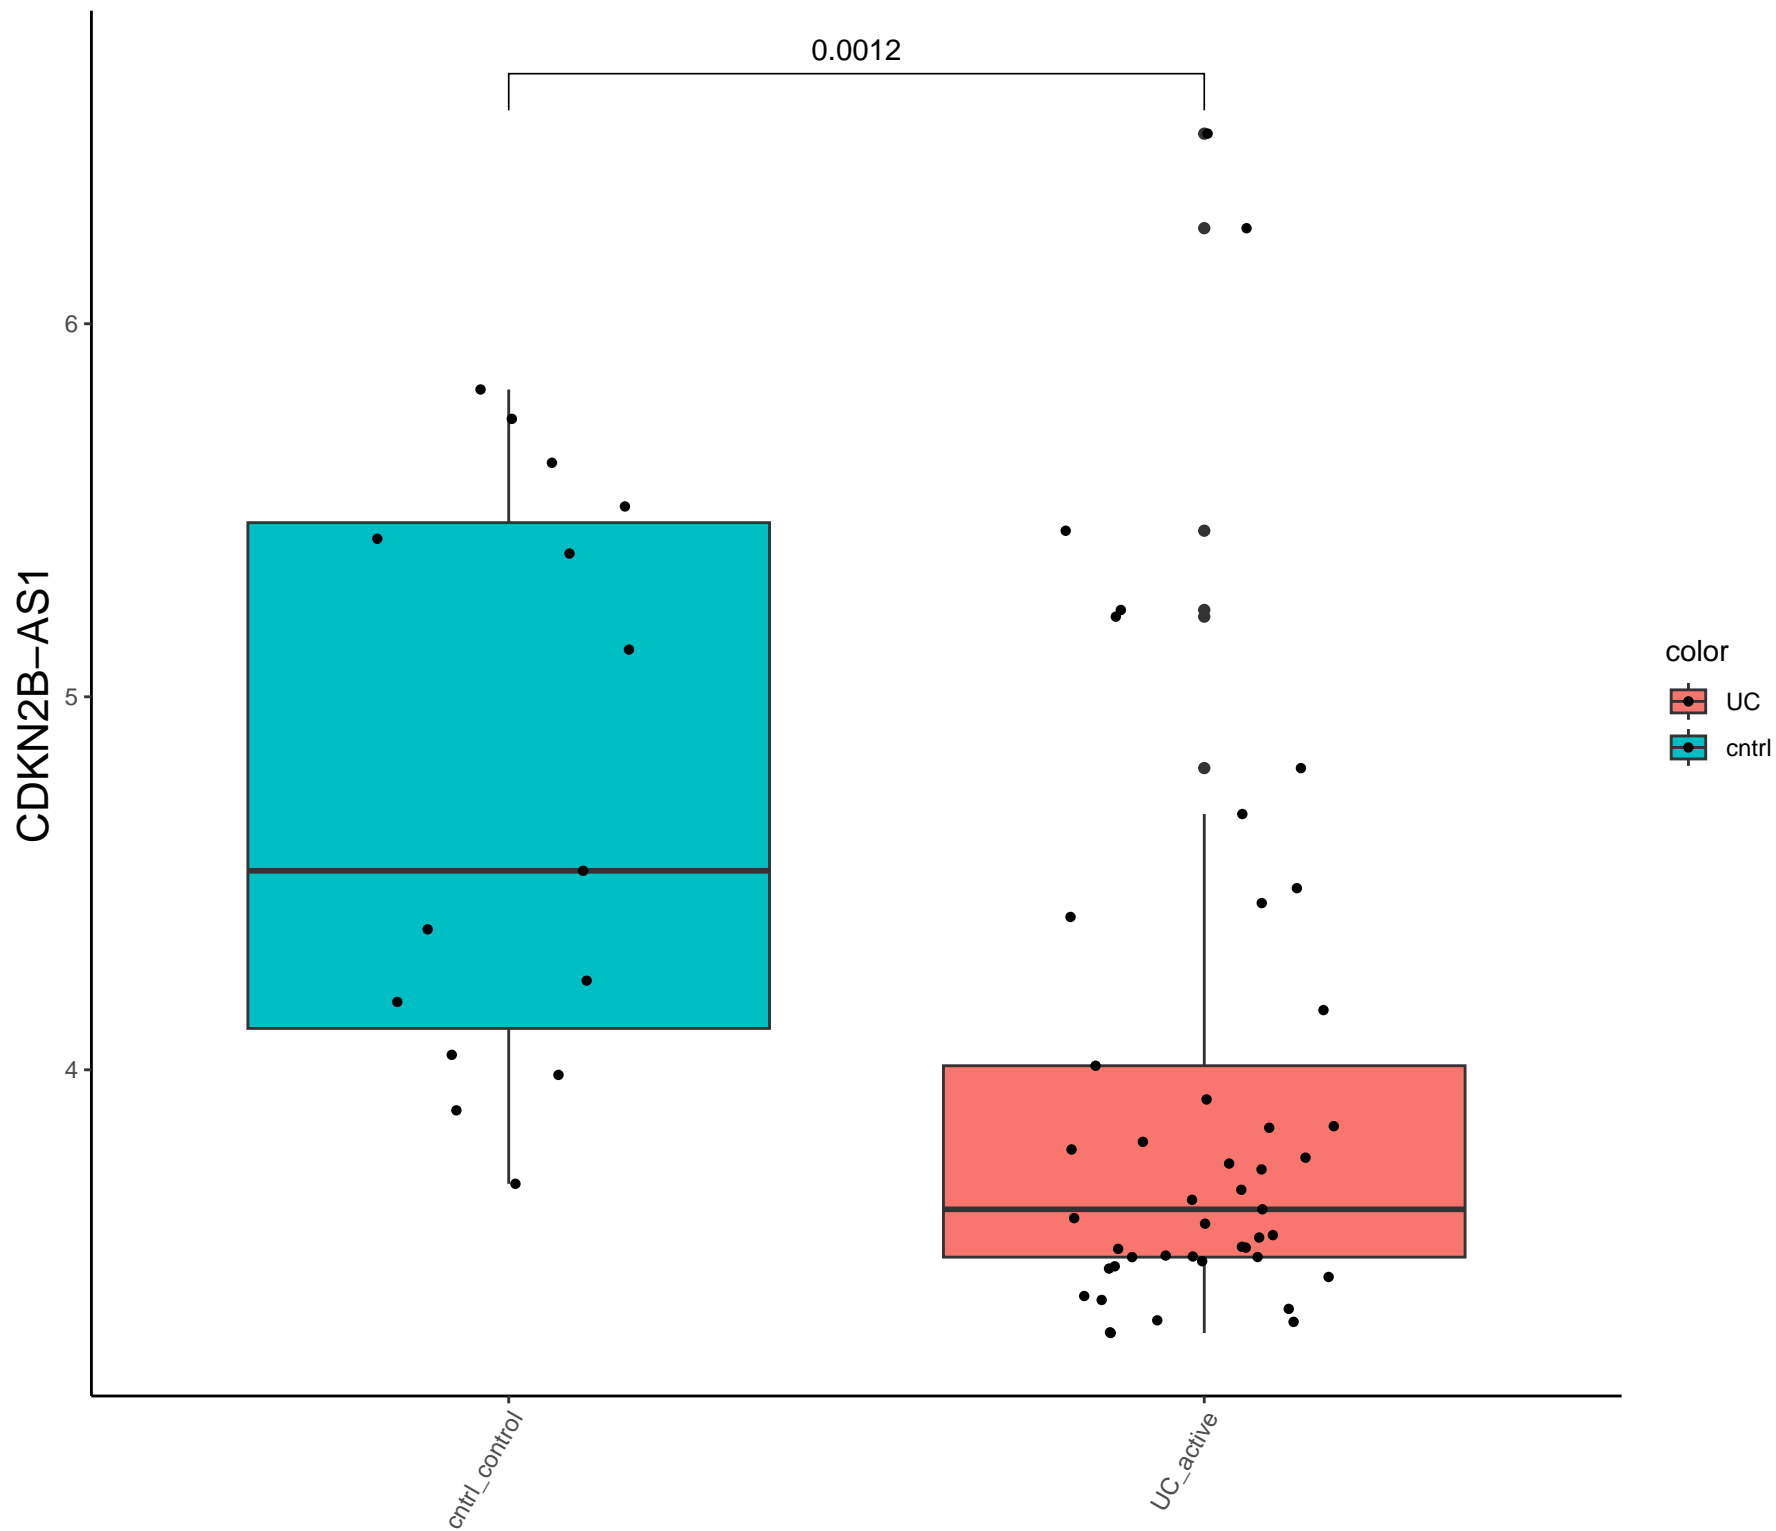

GSE87466

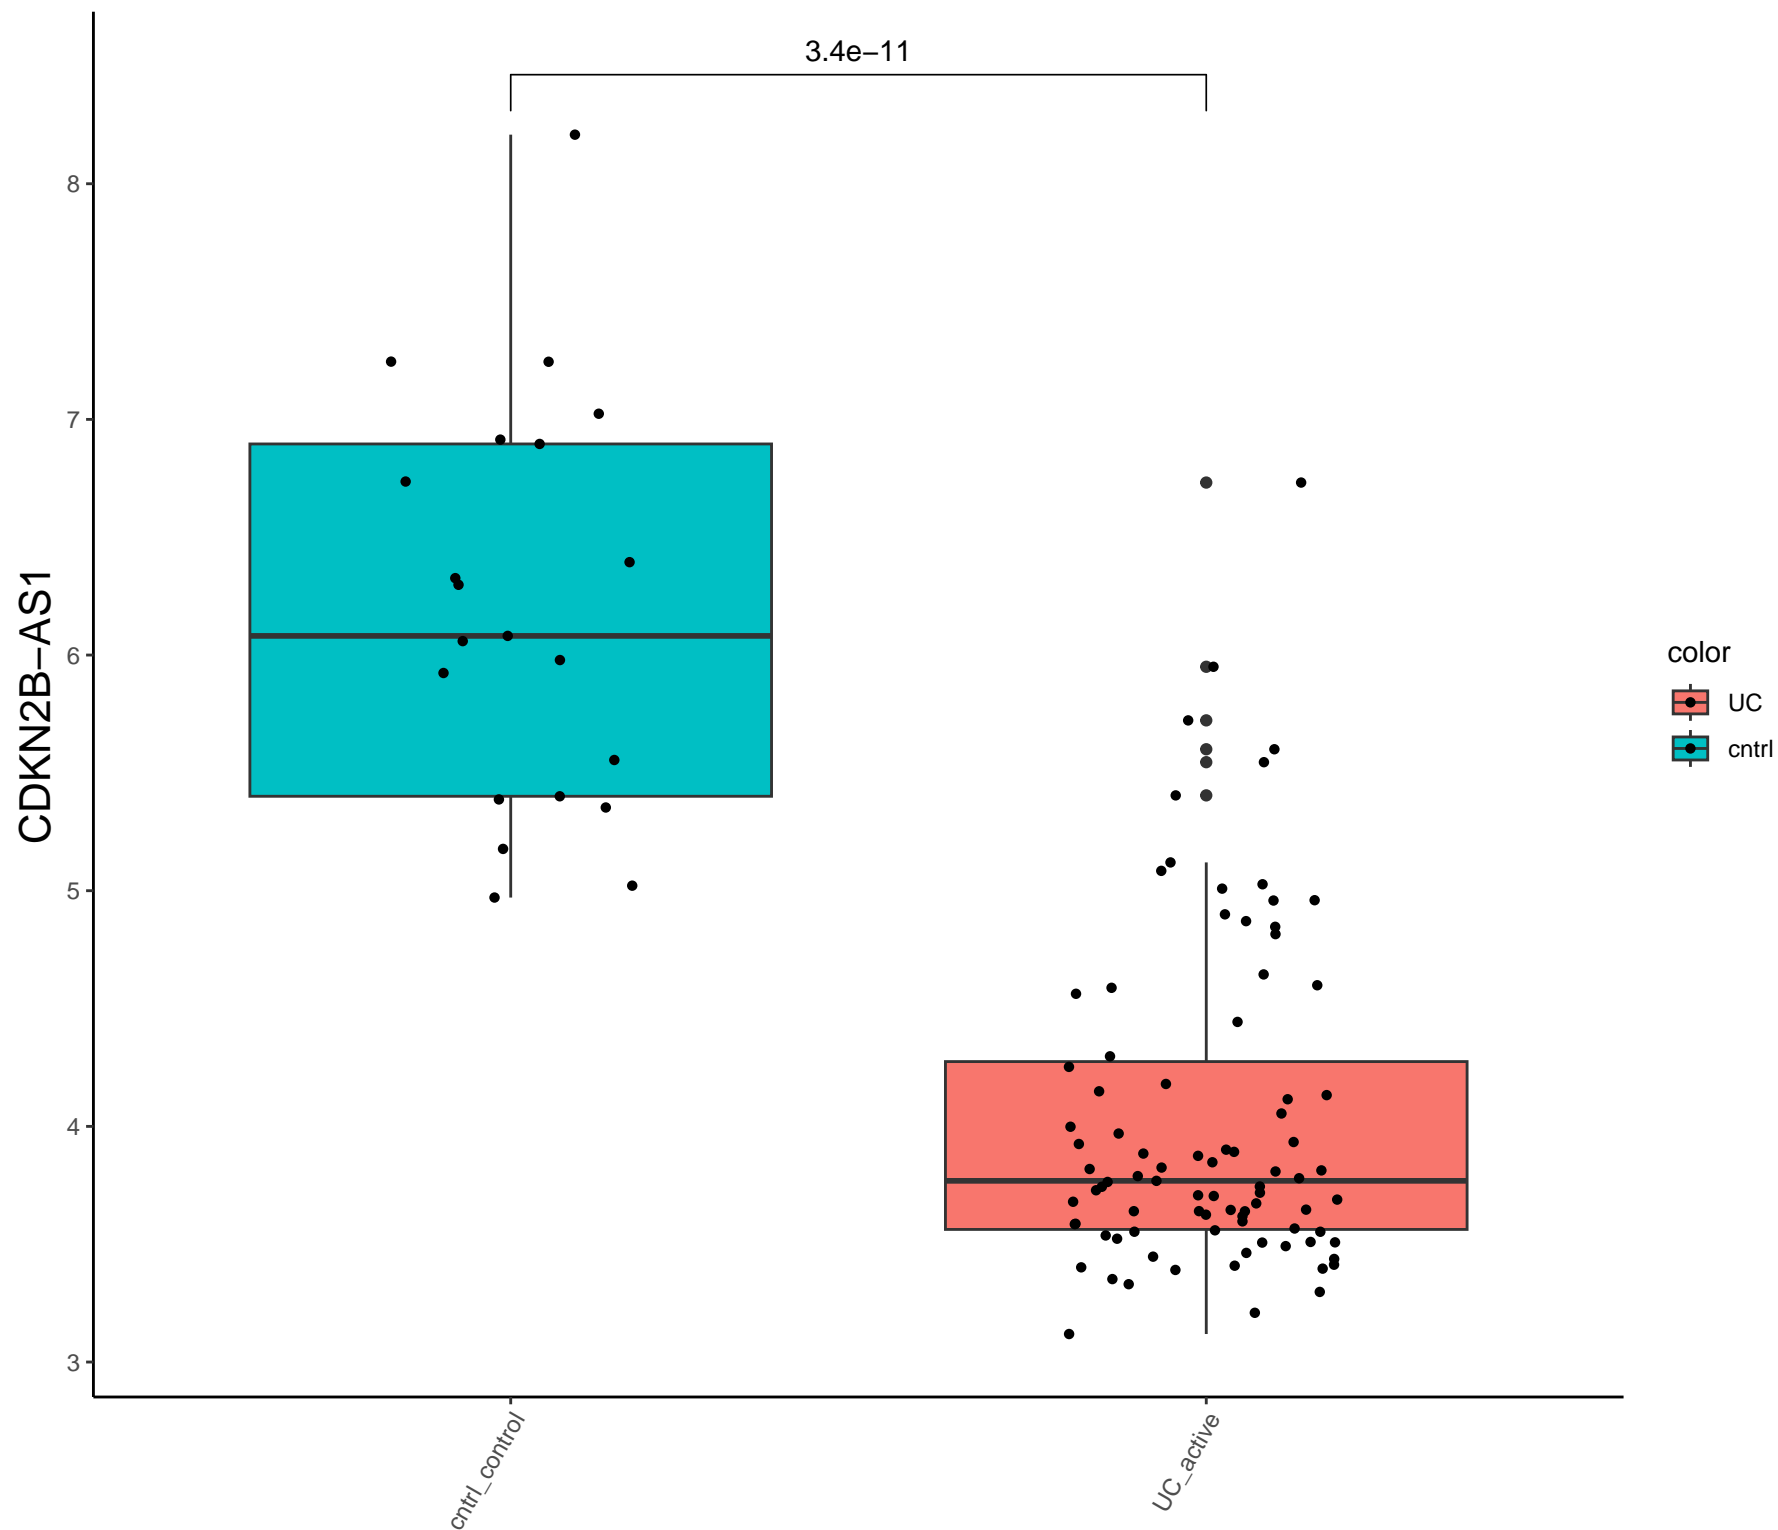

GSE92415

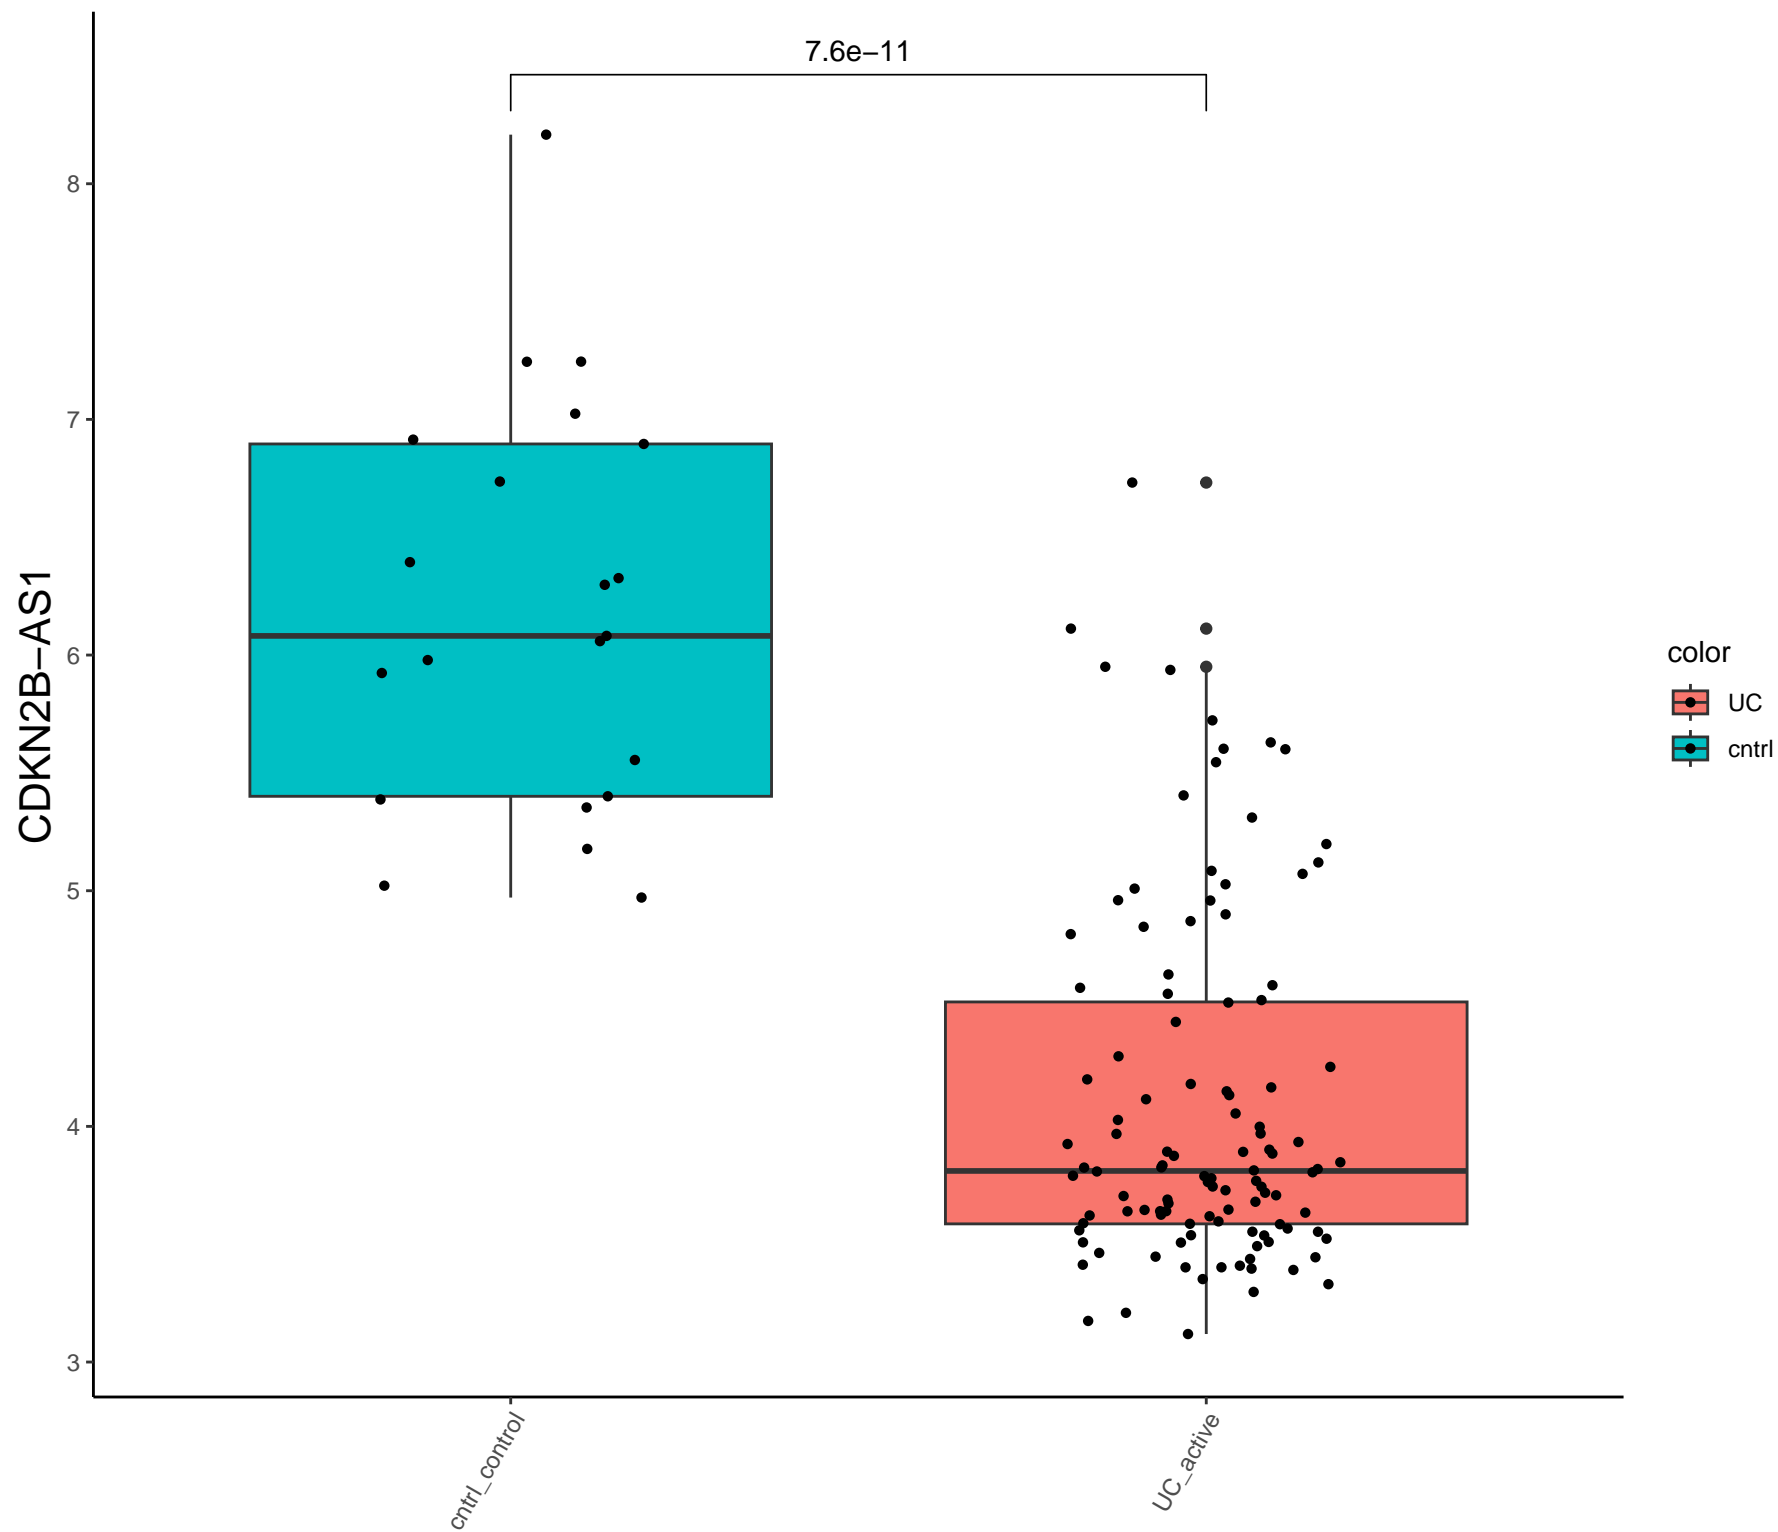



GSE107499

$p < 2.22\text{e-}16$

CRNDE

color

Lesional  
Non-lesional

UC\_Lesional

UC\_Non-lesional

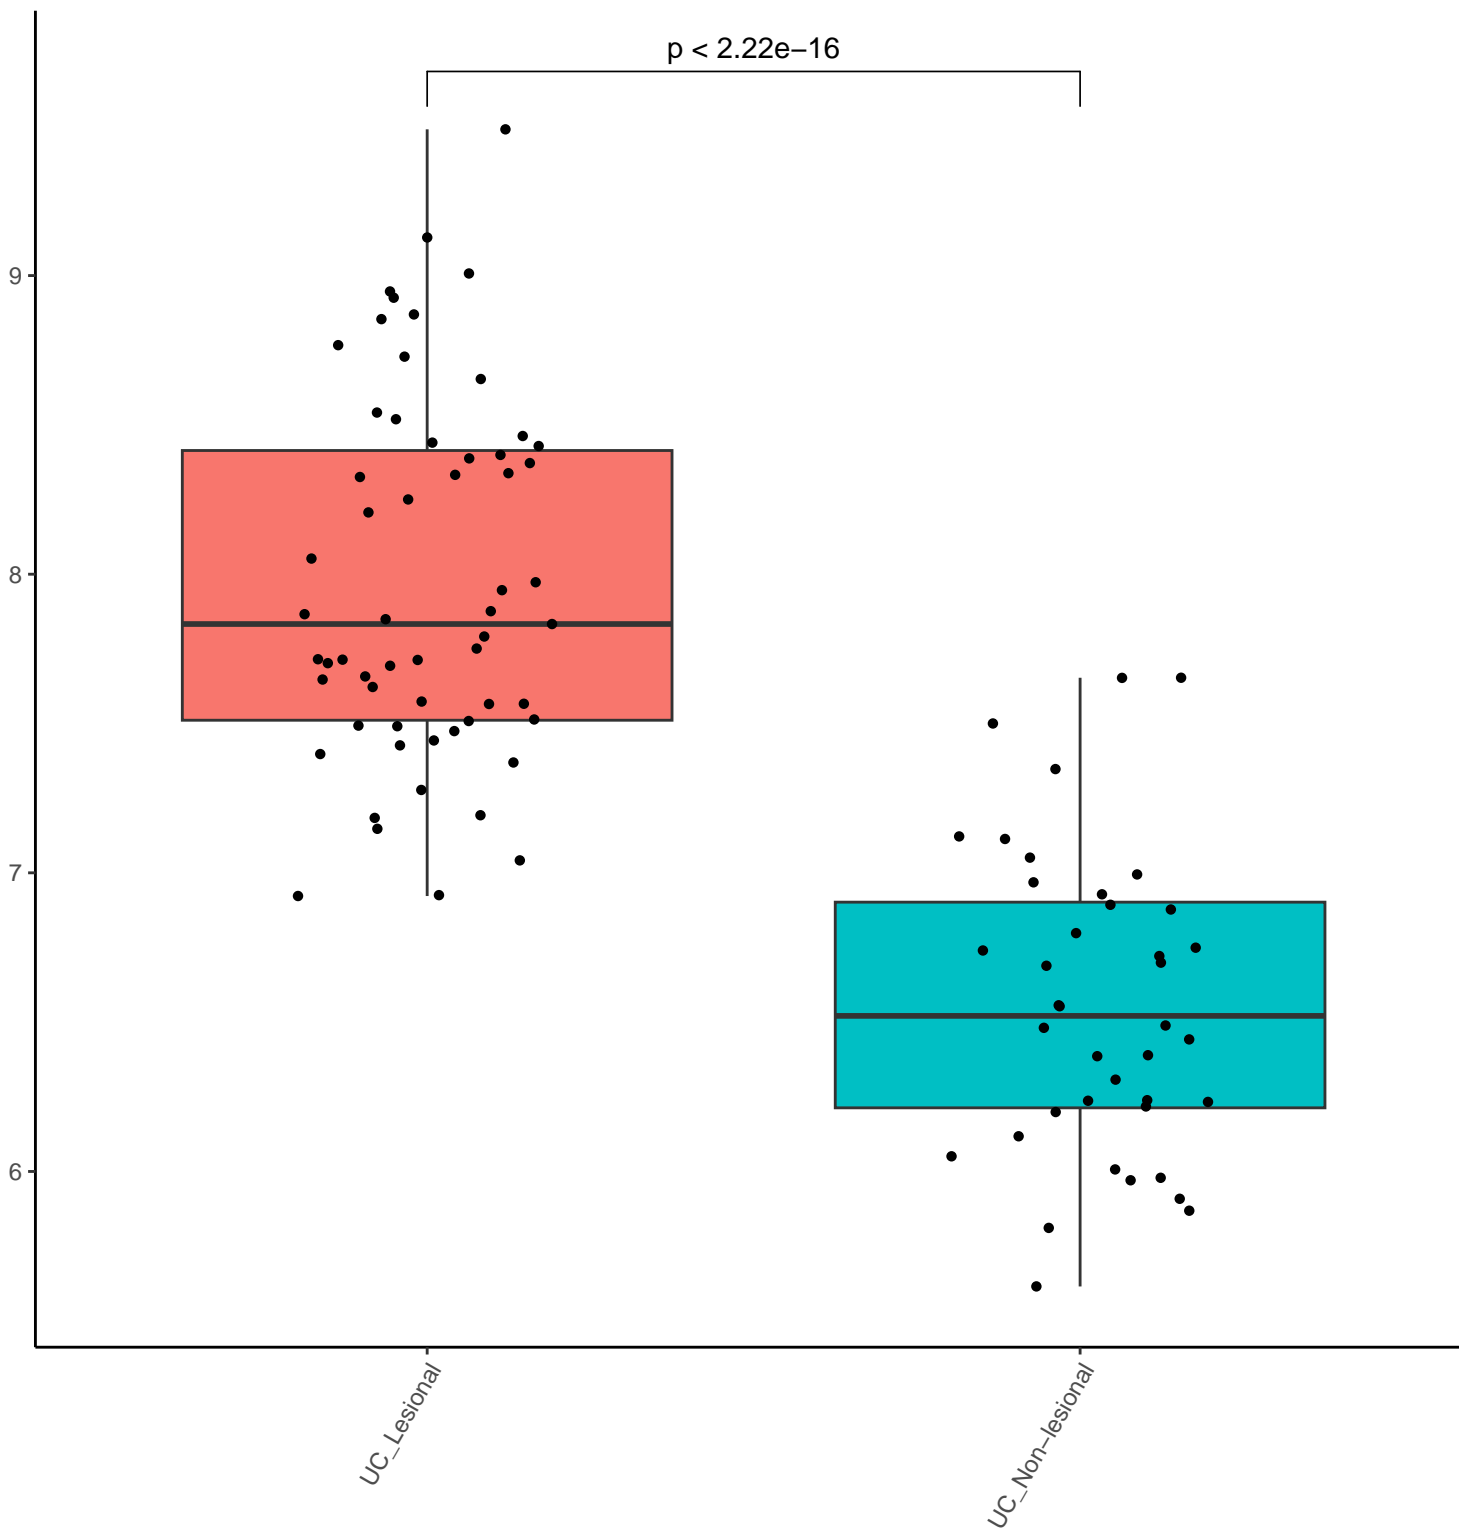

GSE109142

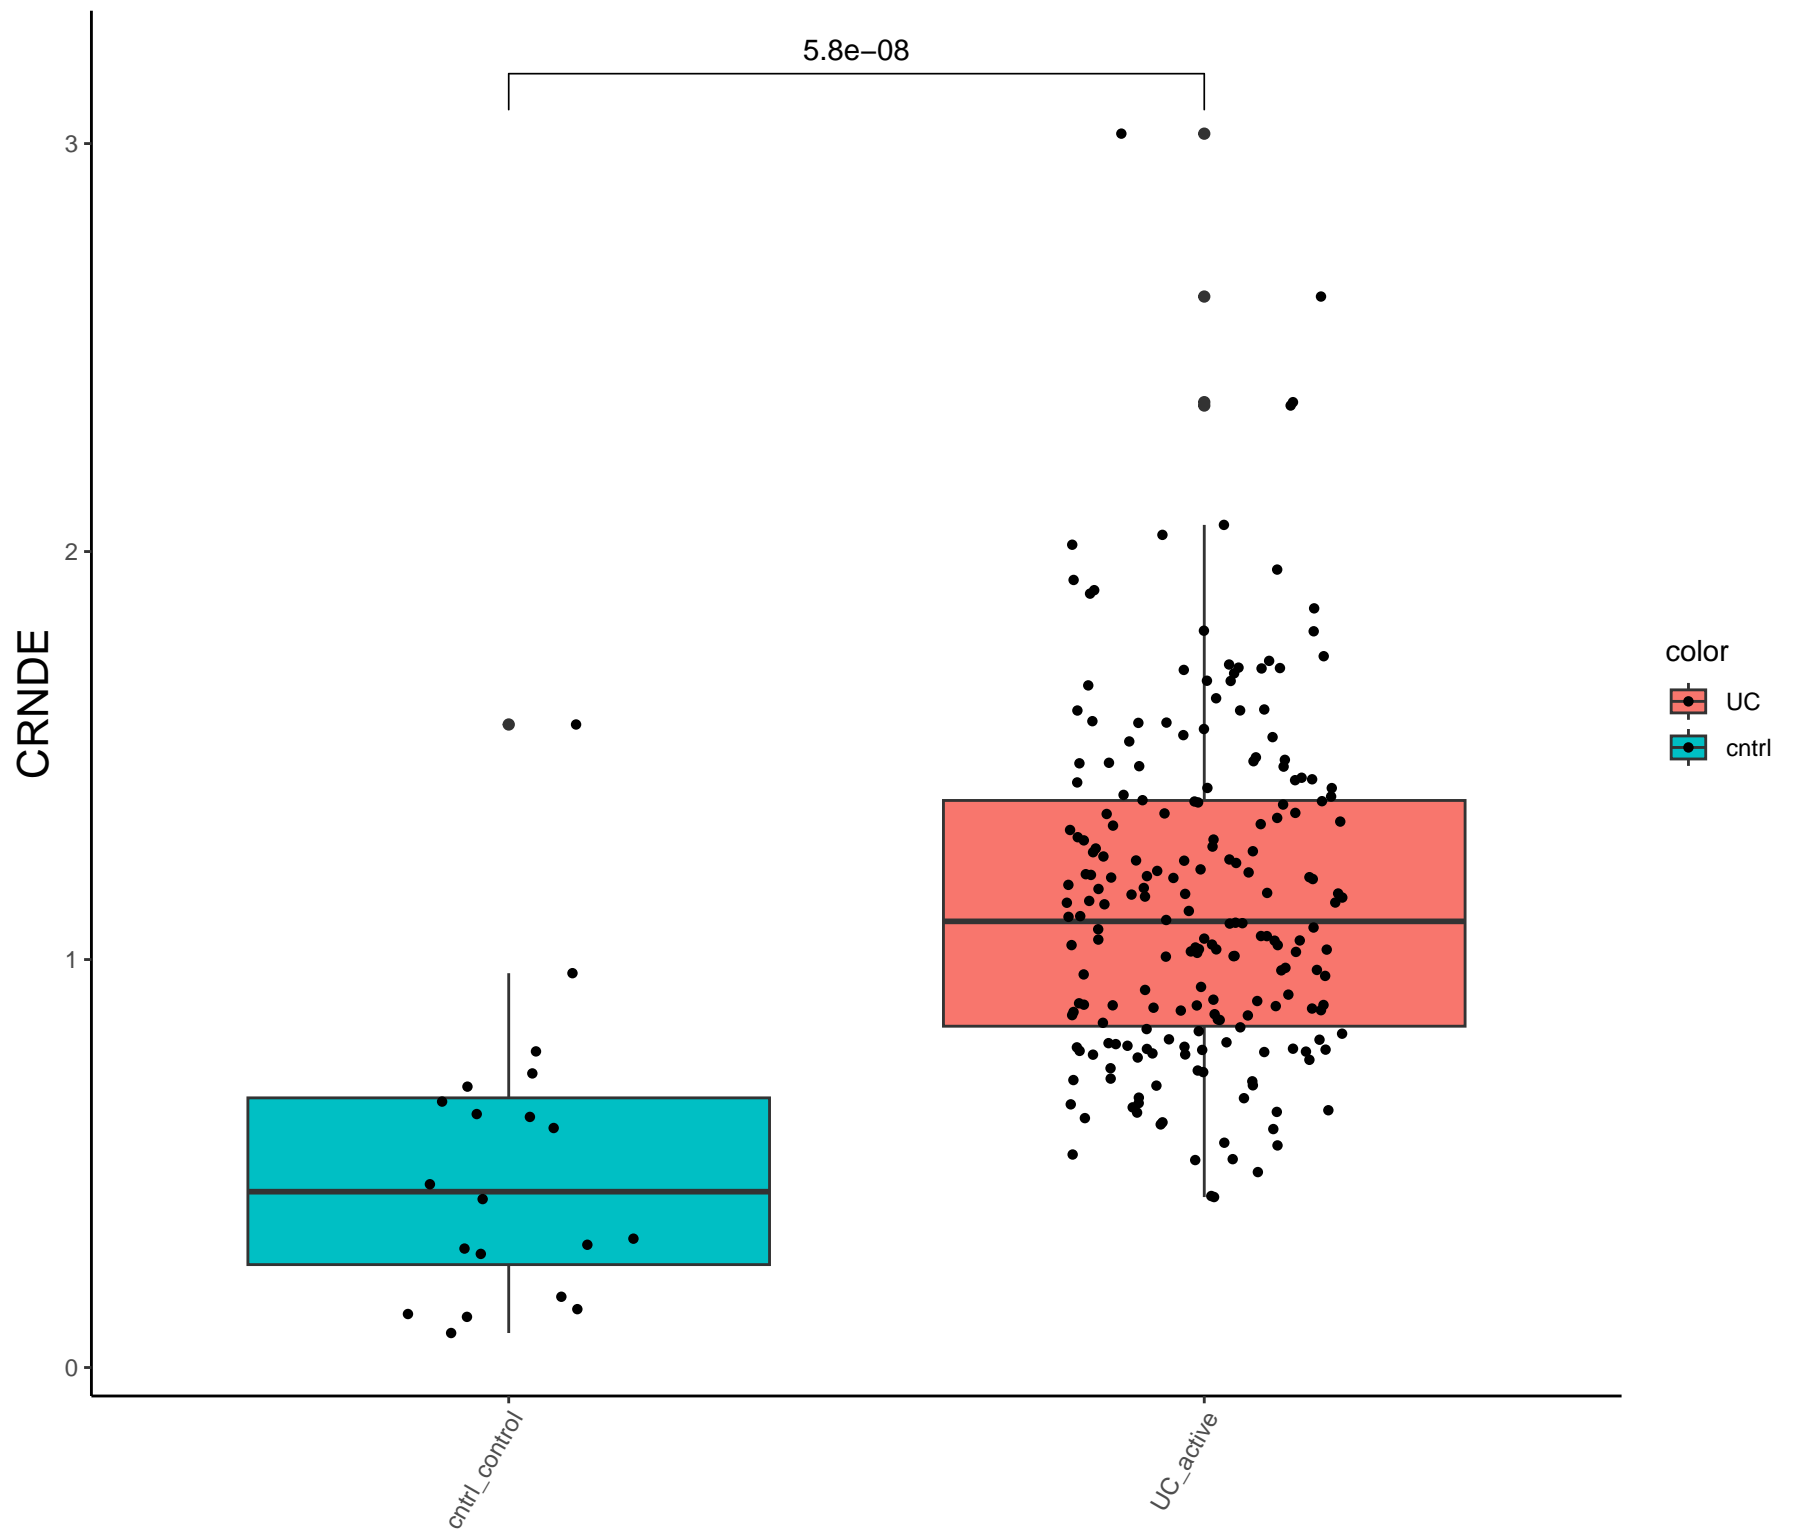

GSE128682

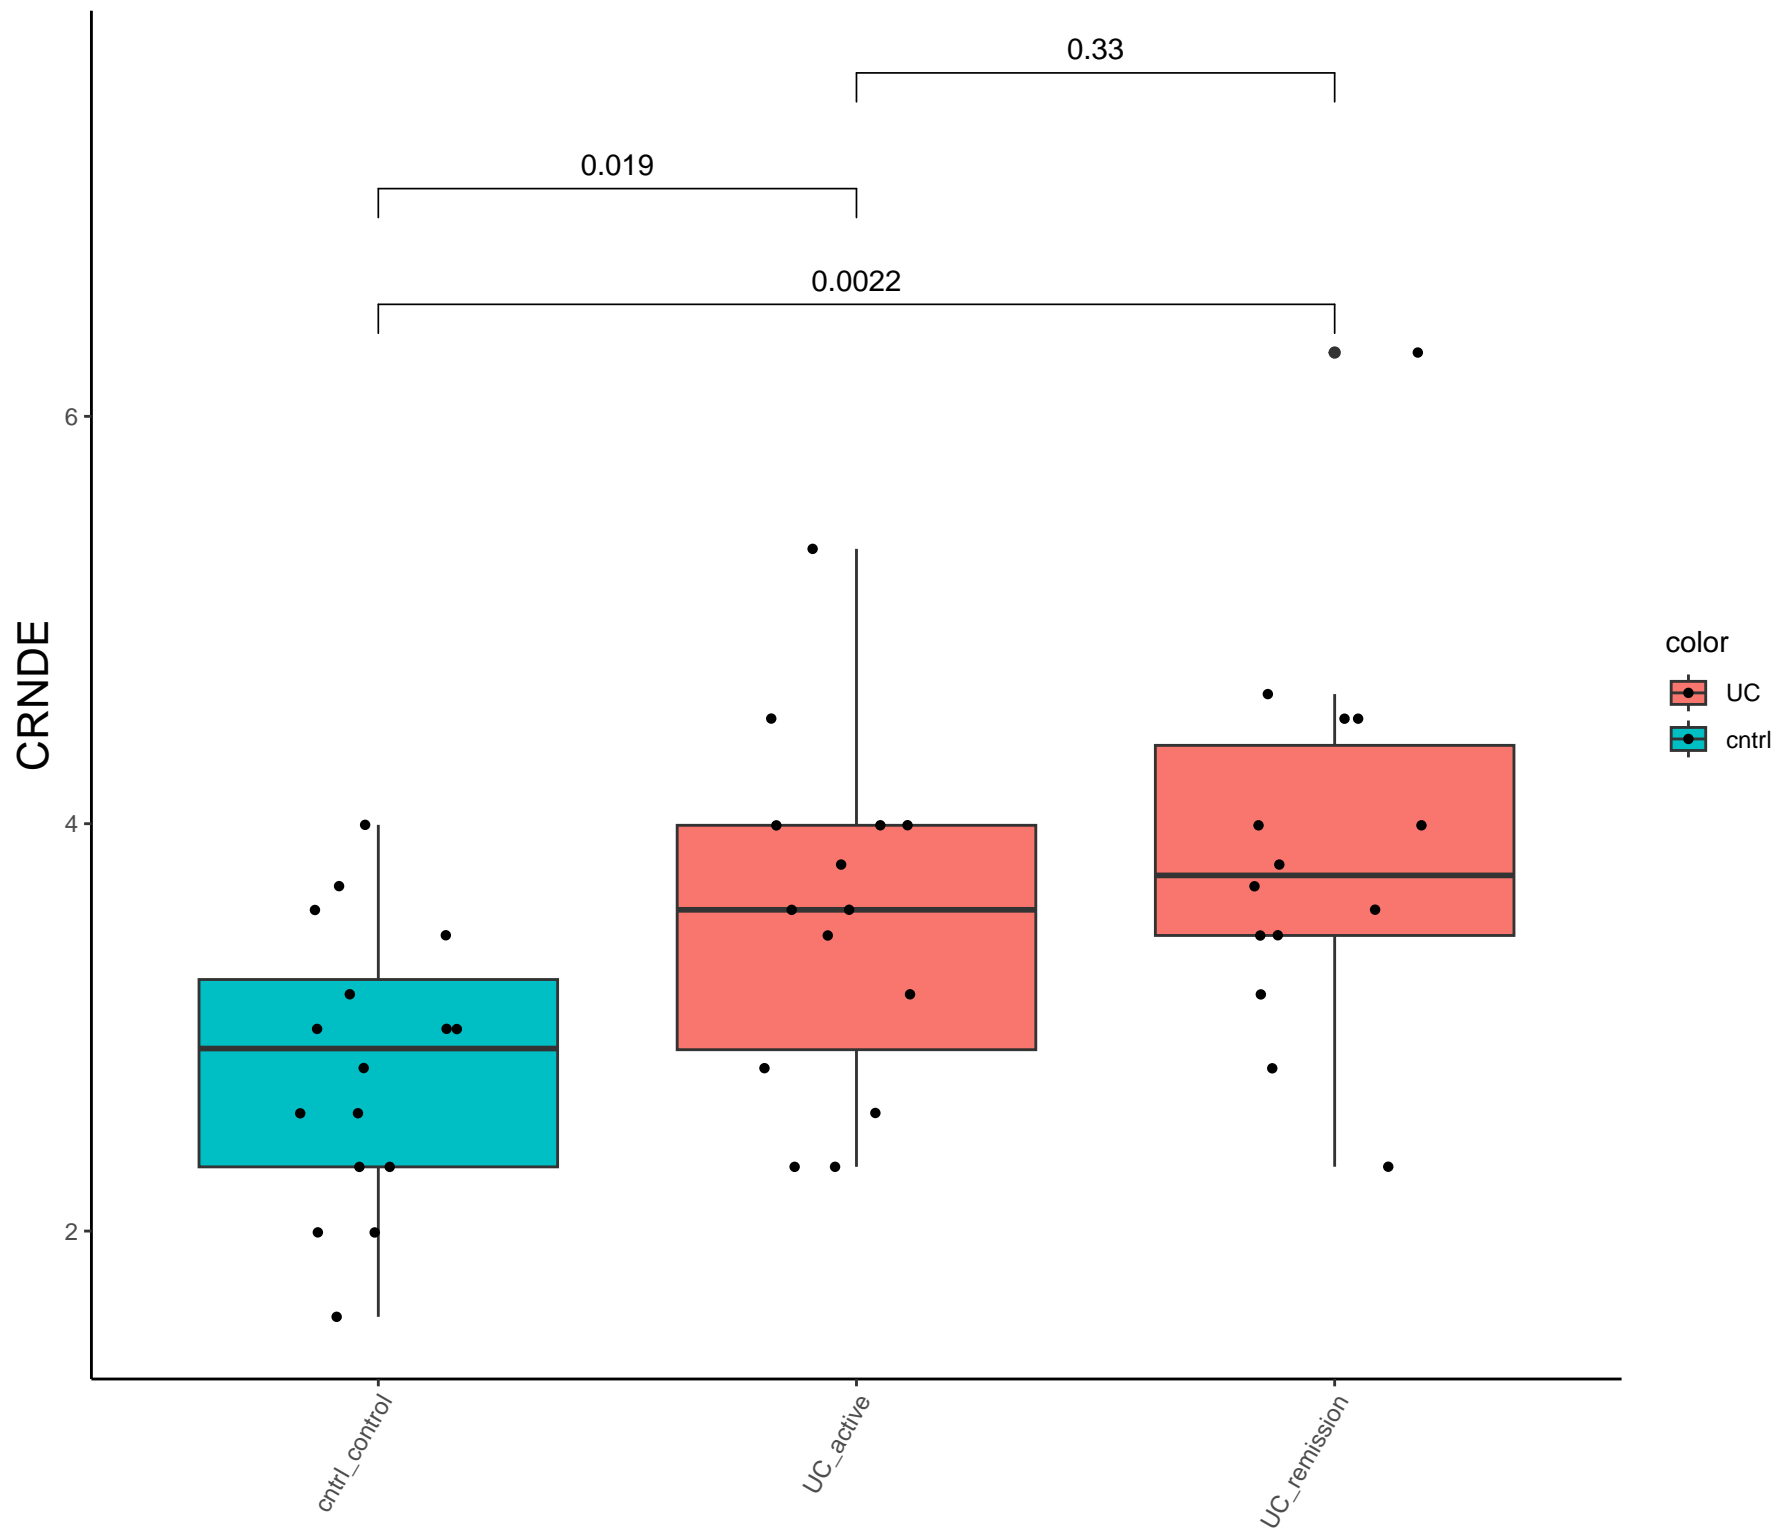

GSE16879

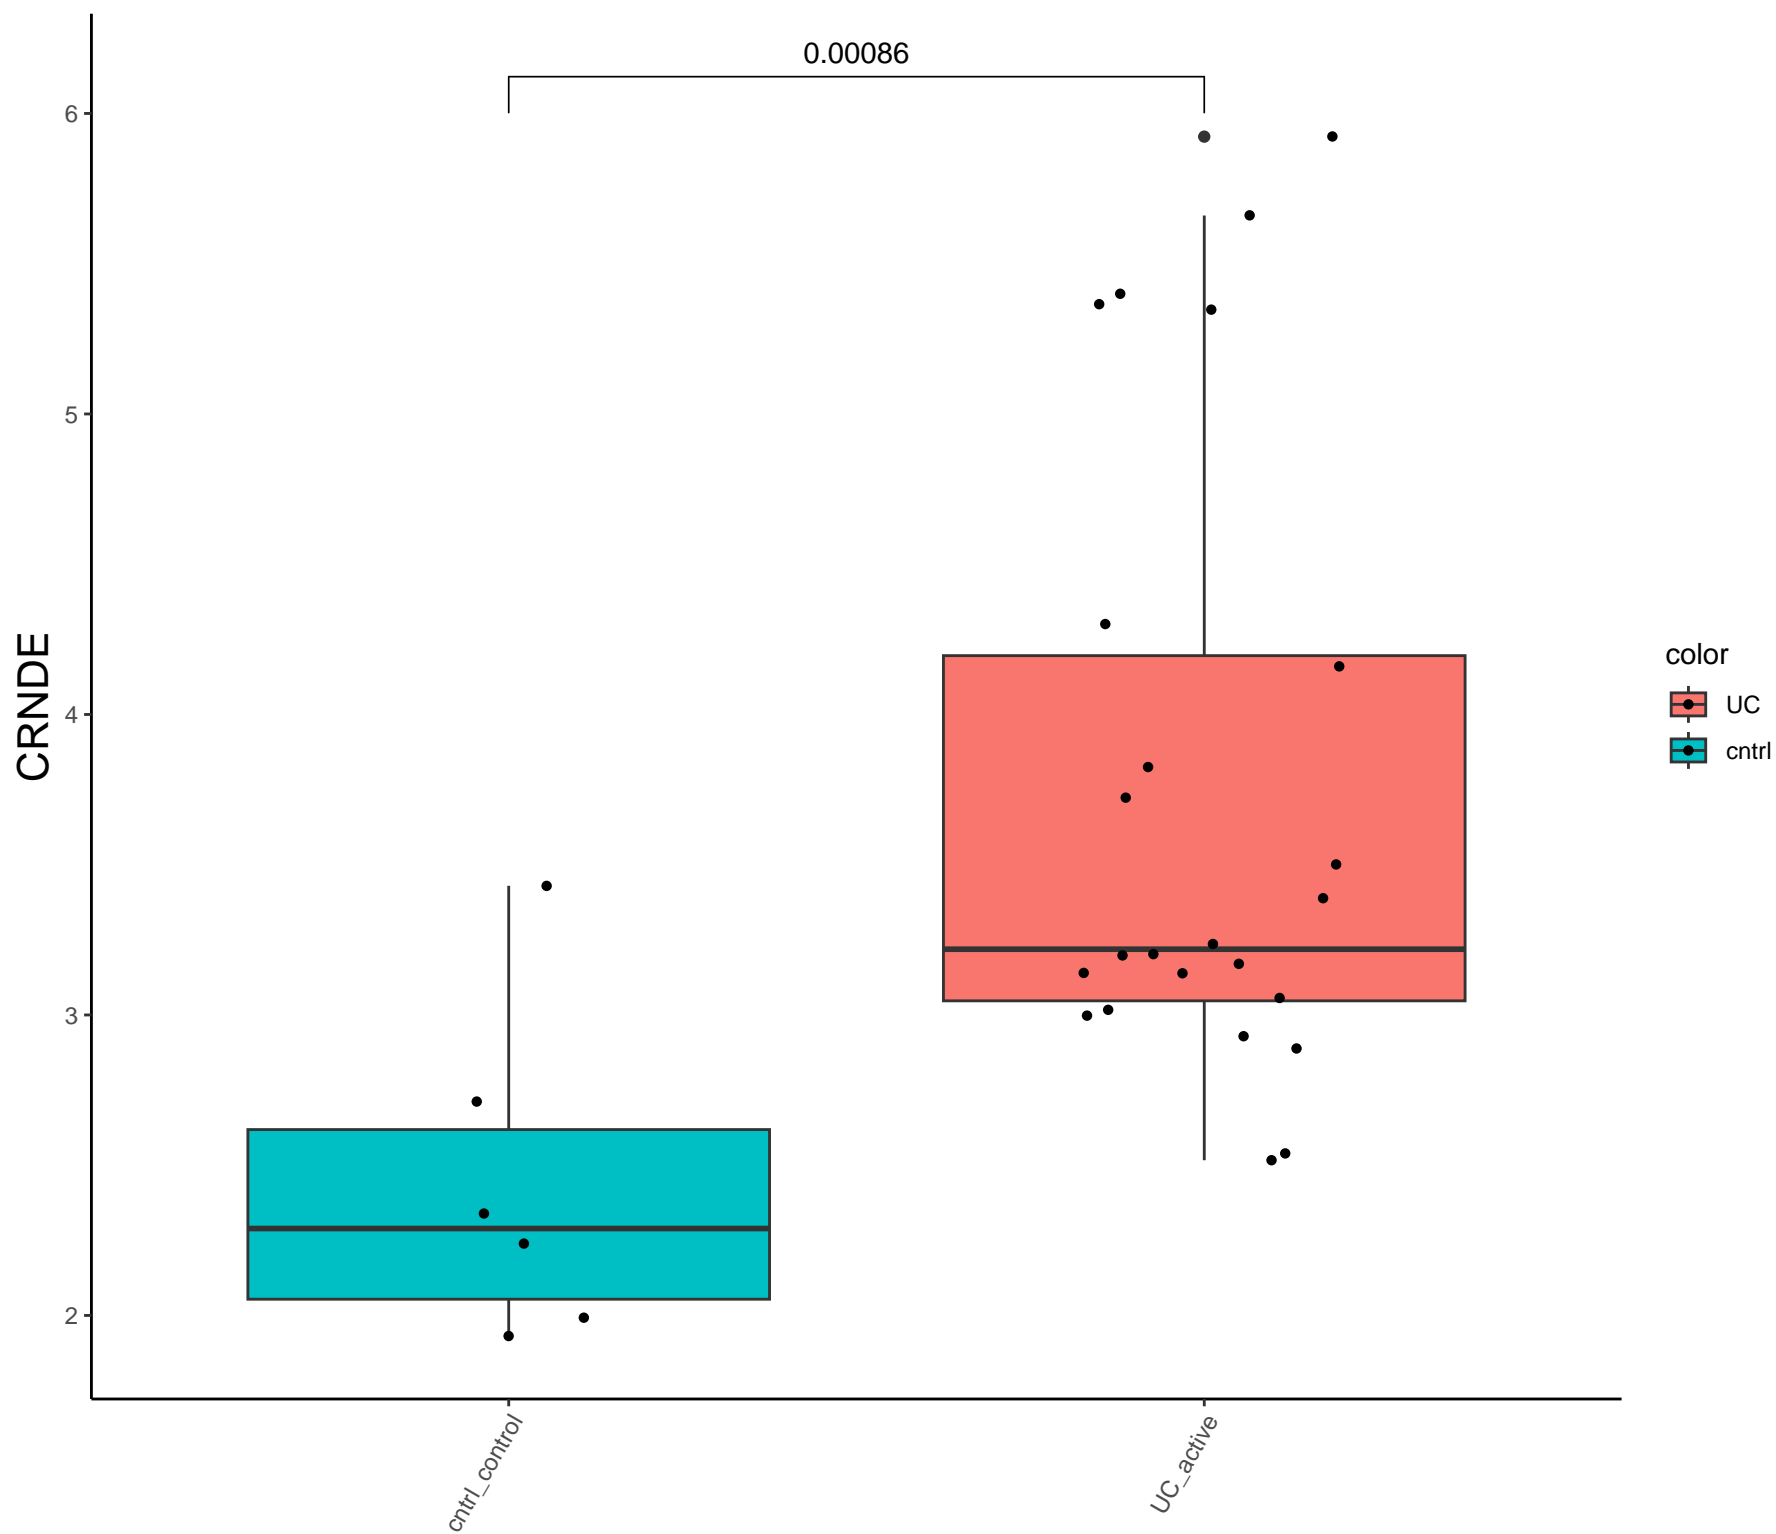

GSE206285

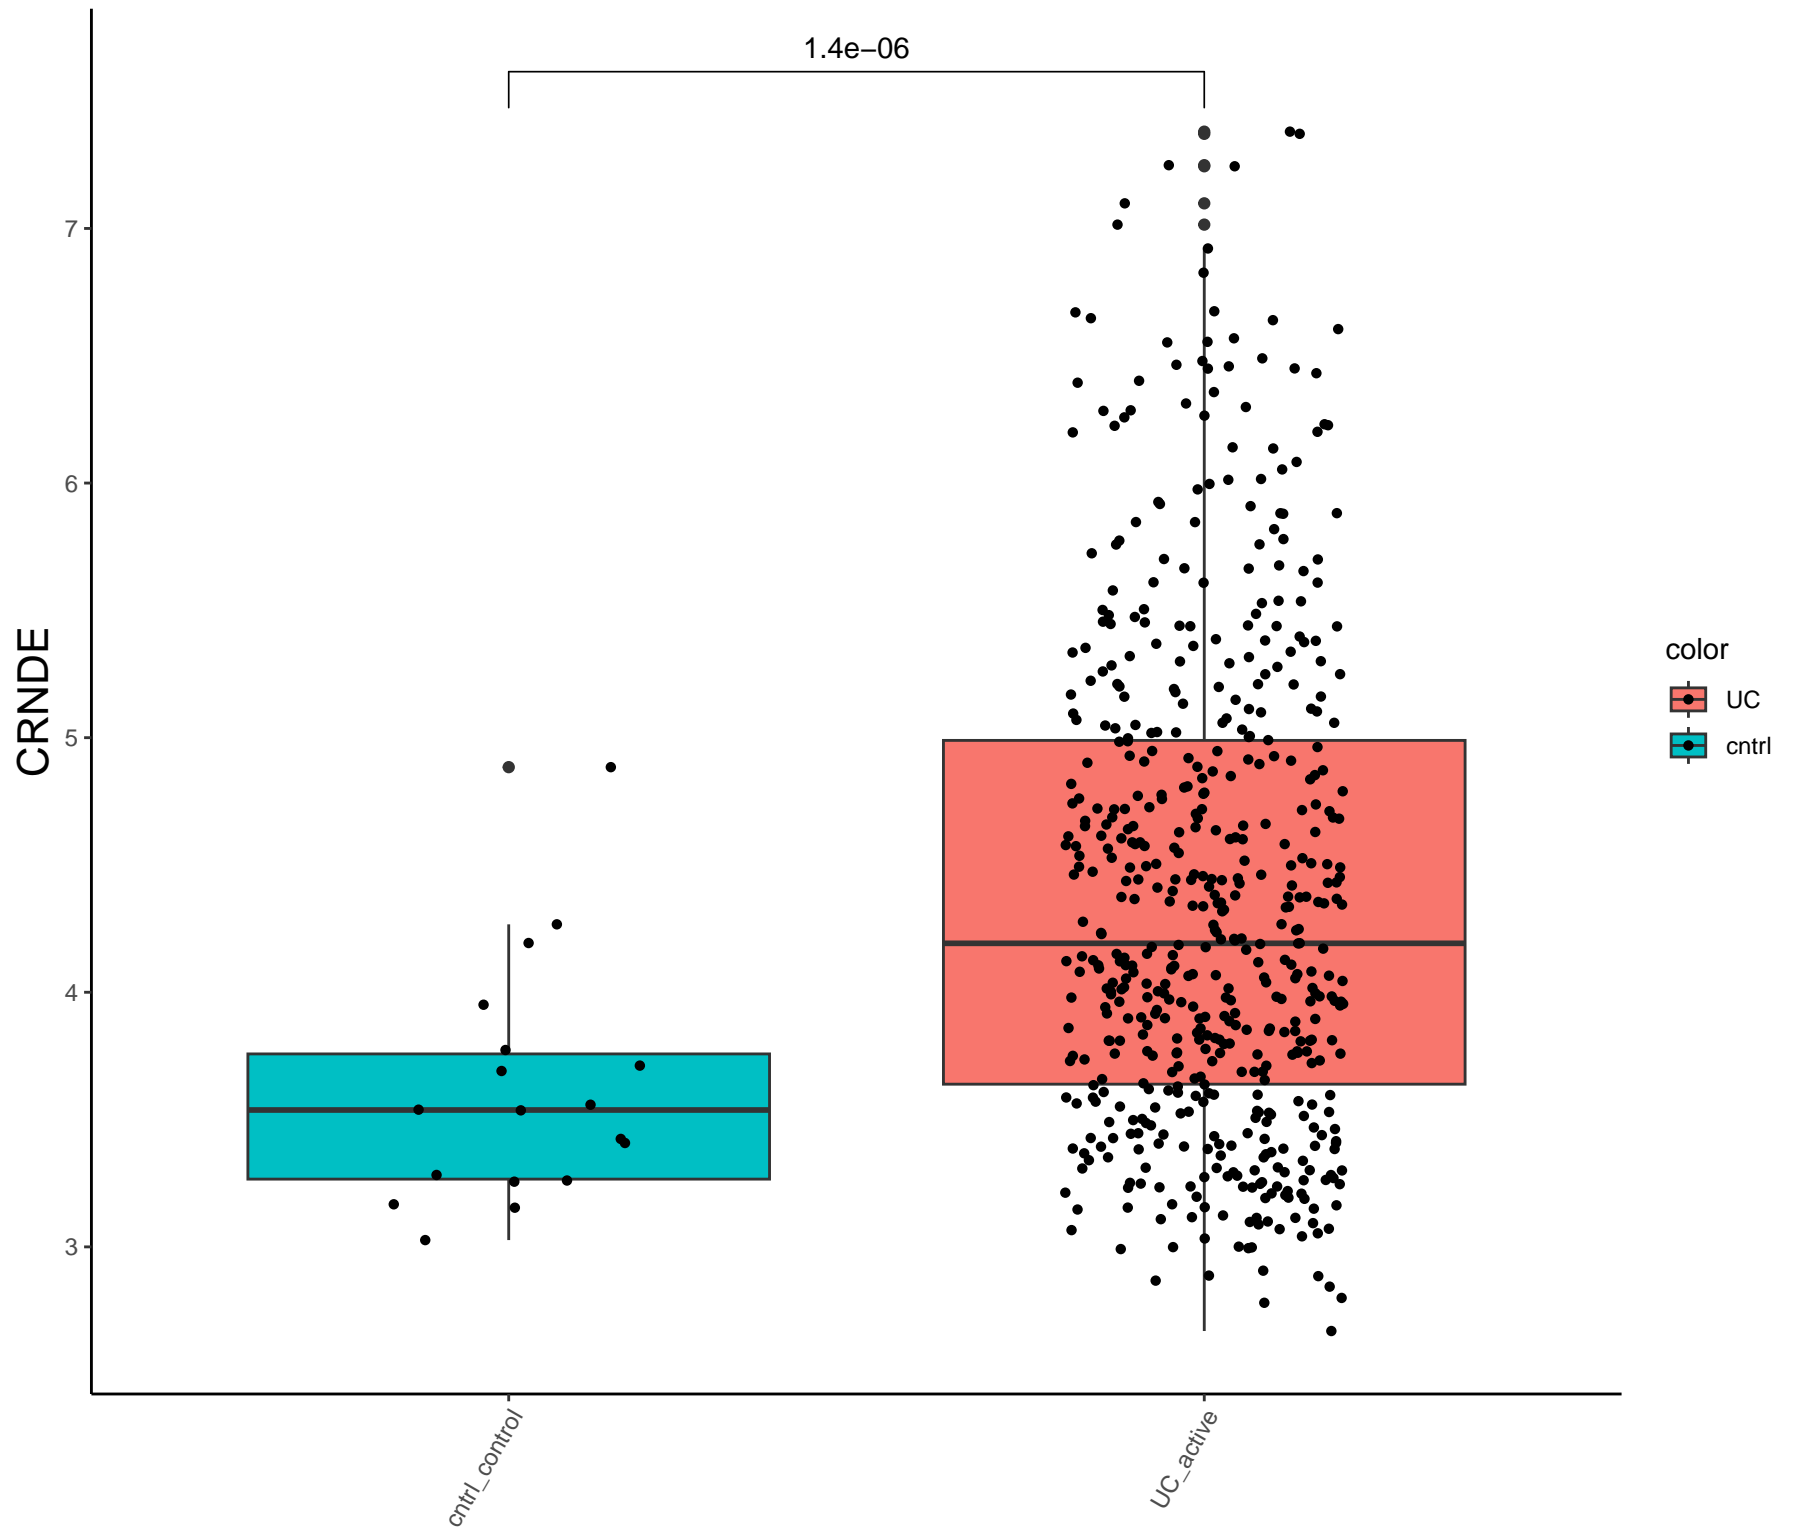

GSE92415

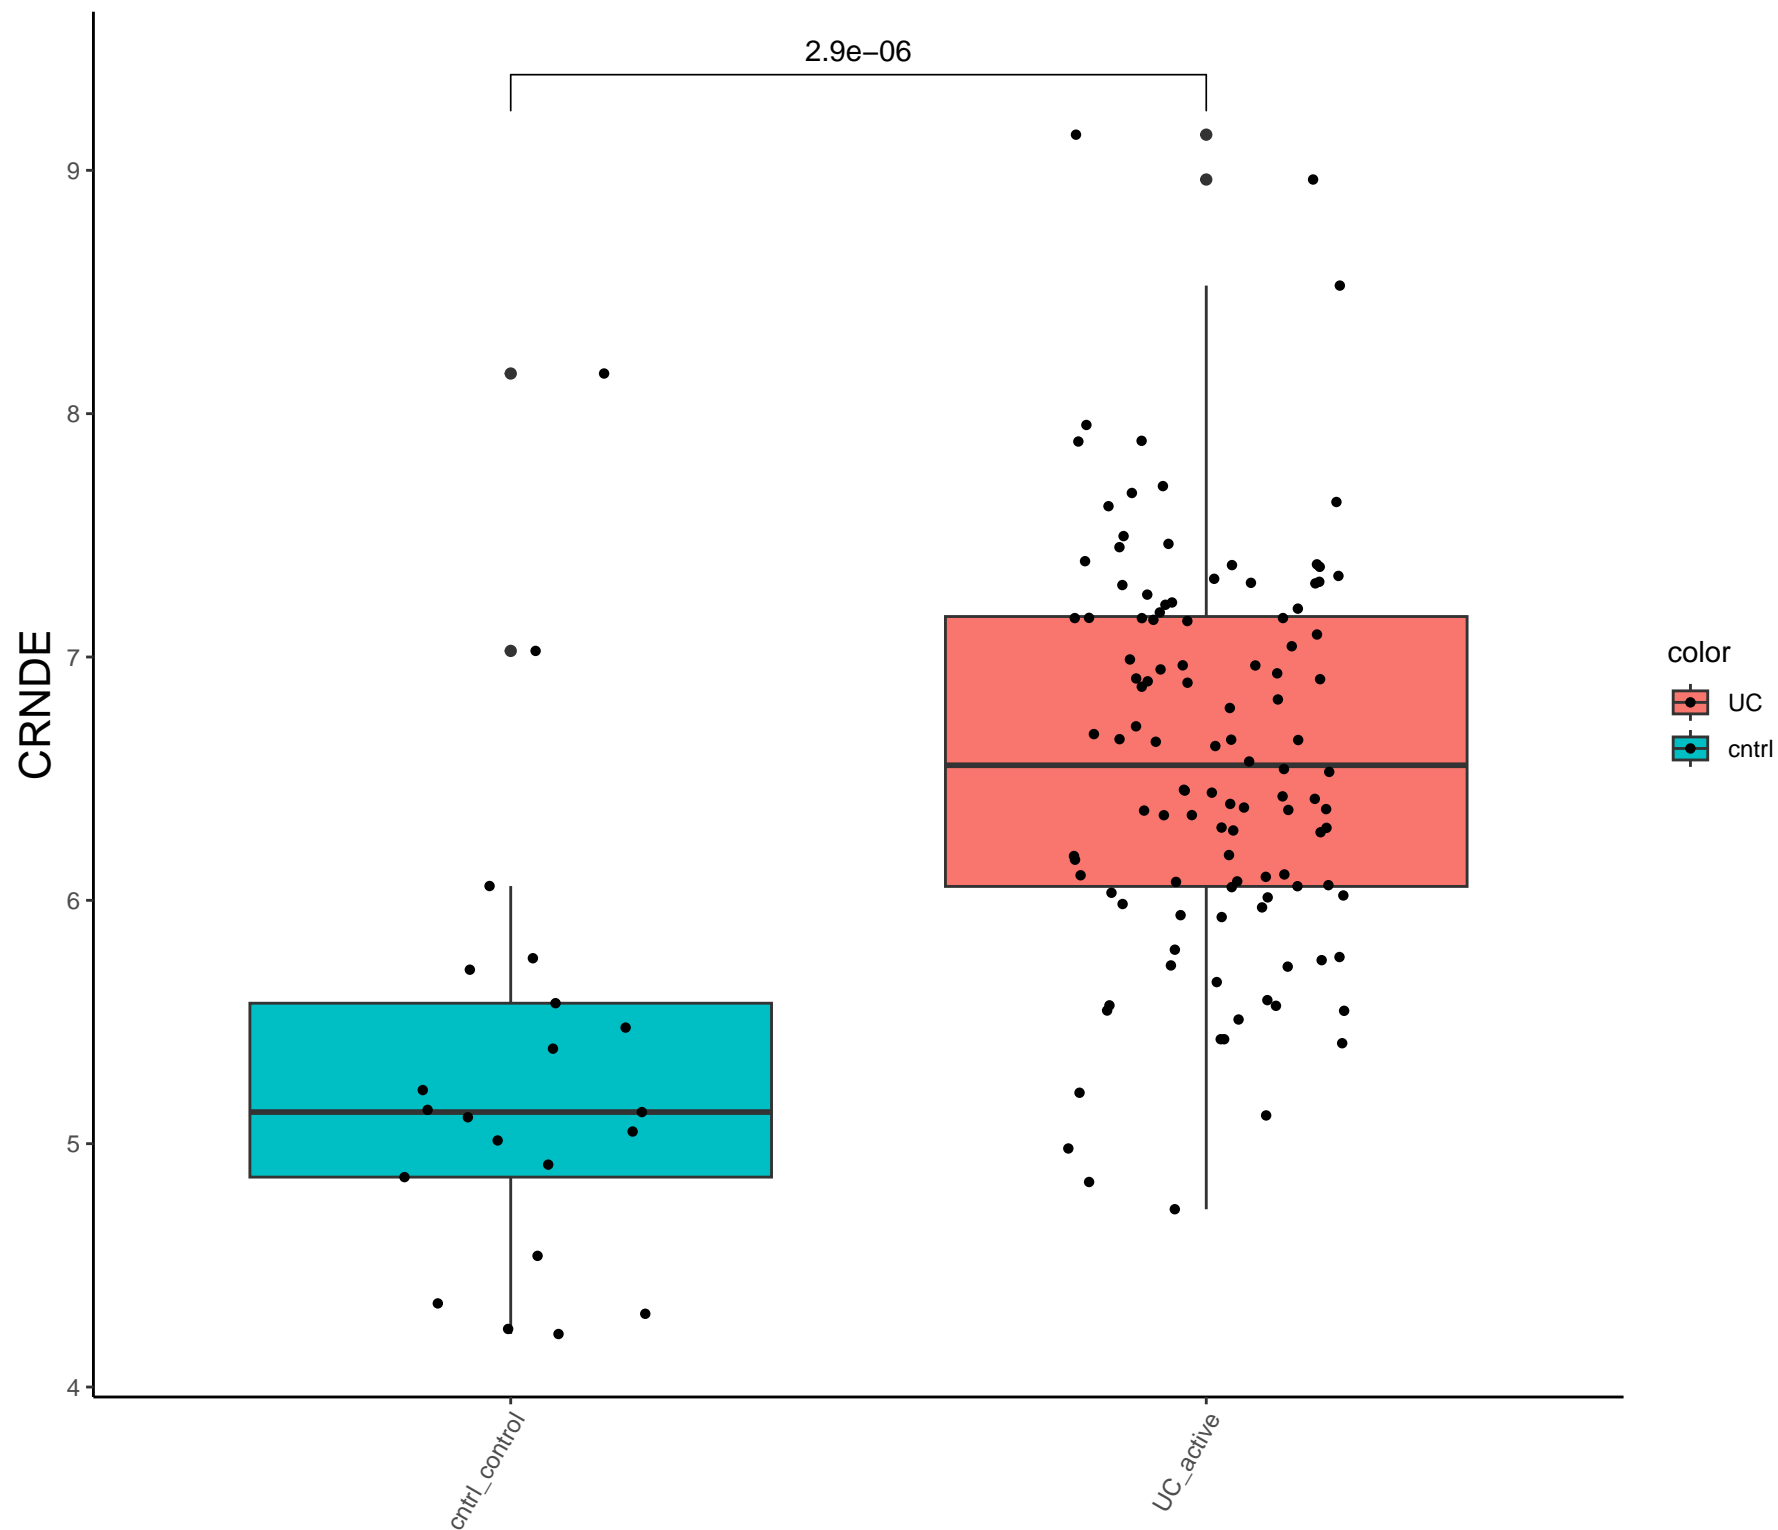

GSE107499

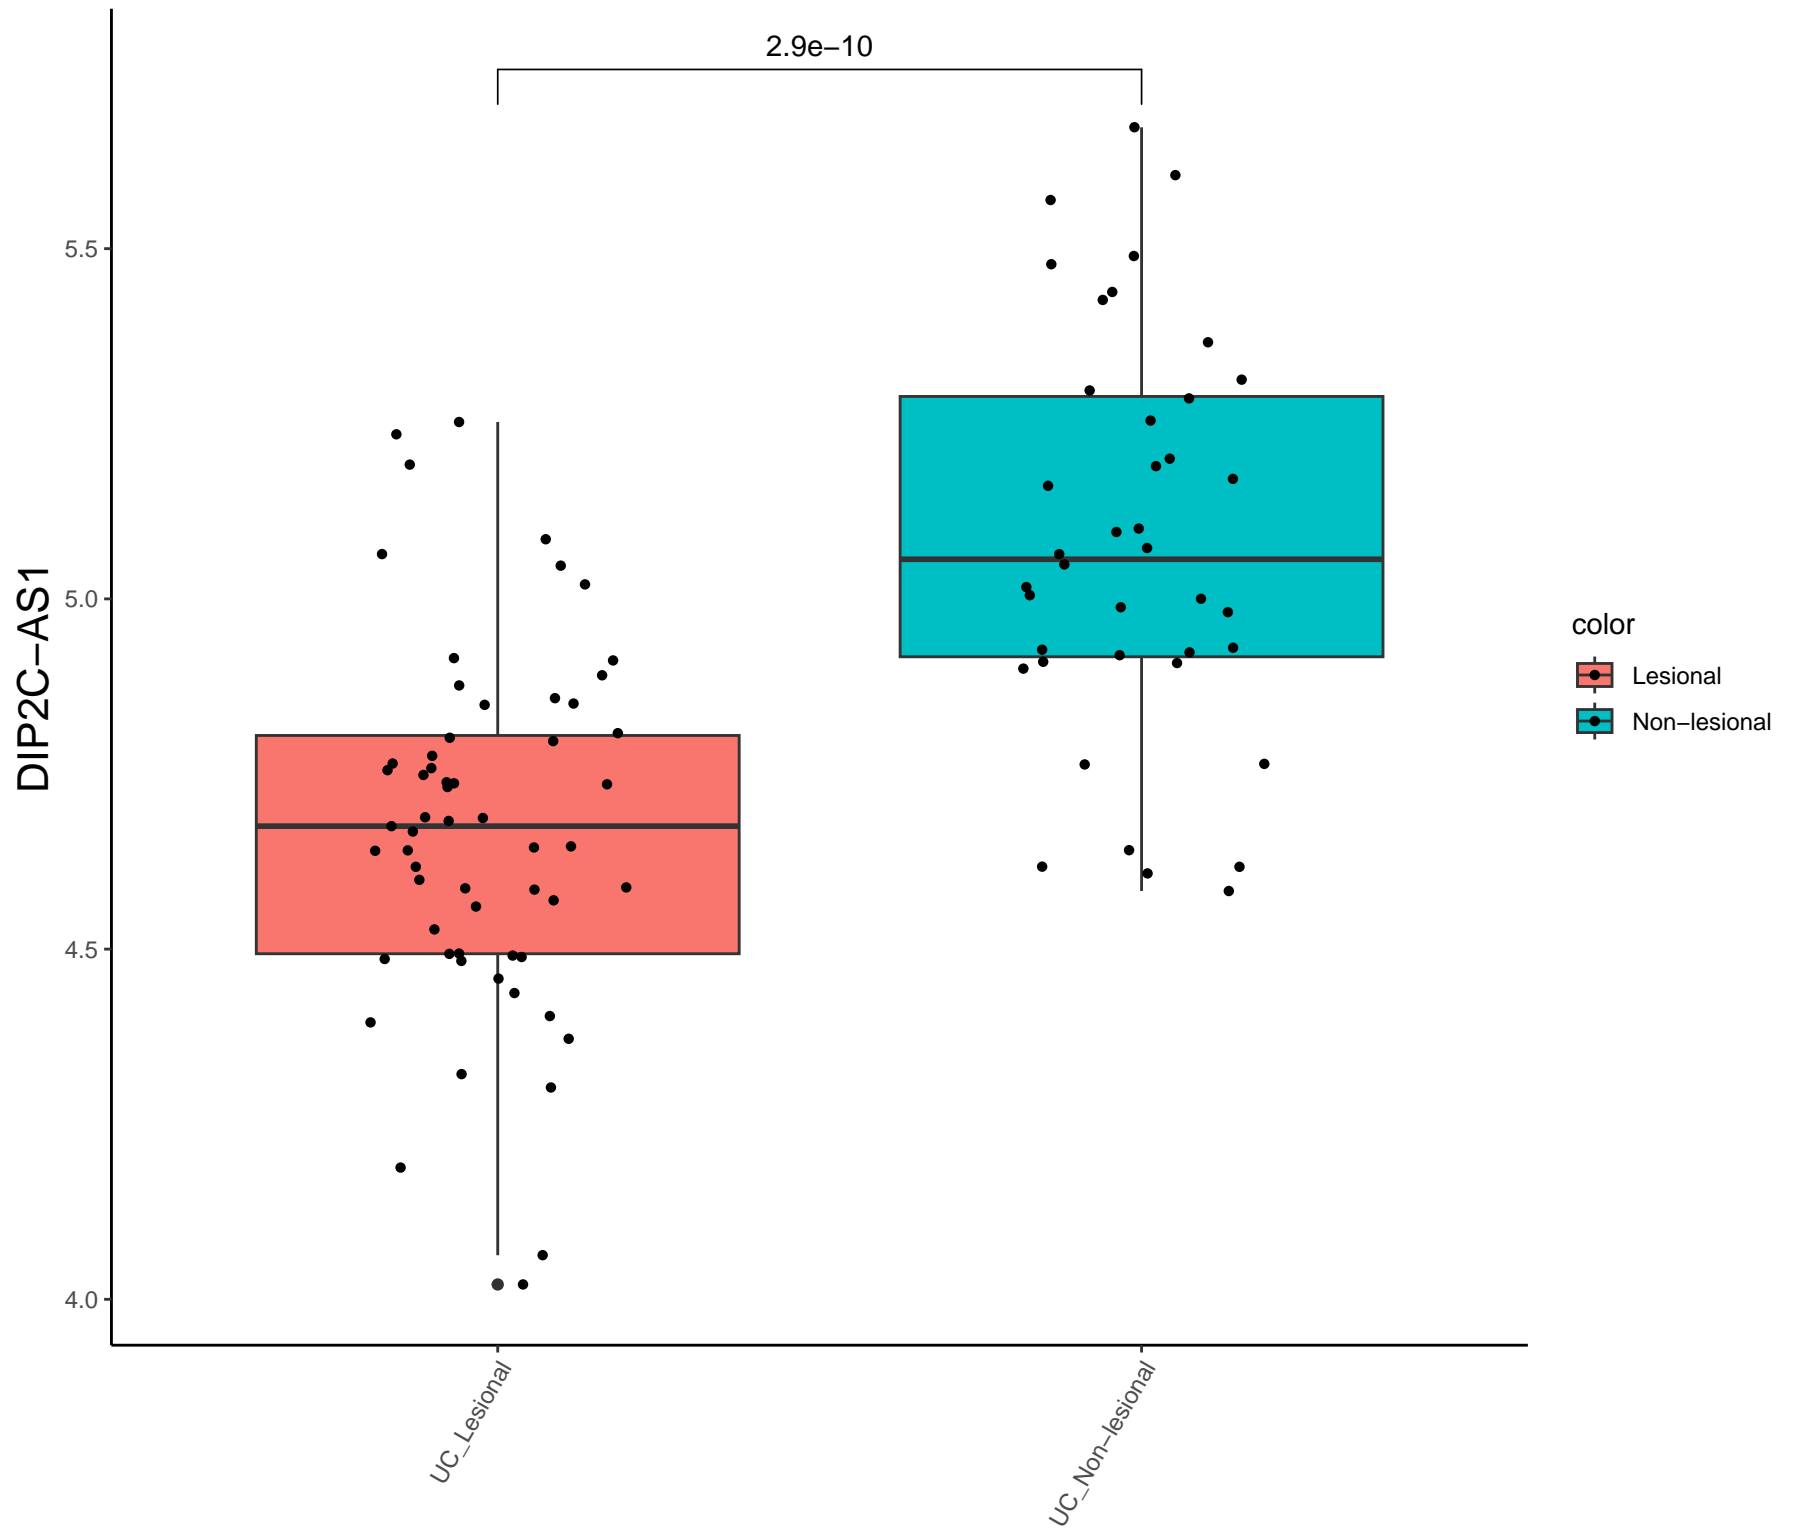

GSE109142

DIP2C-AS1

3.8e-06

color  
UC  
cntrl

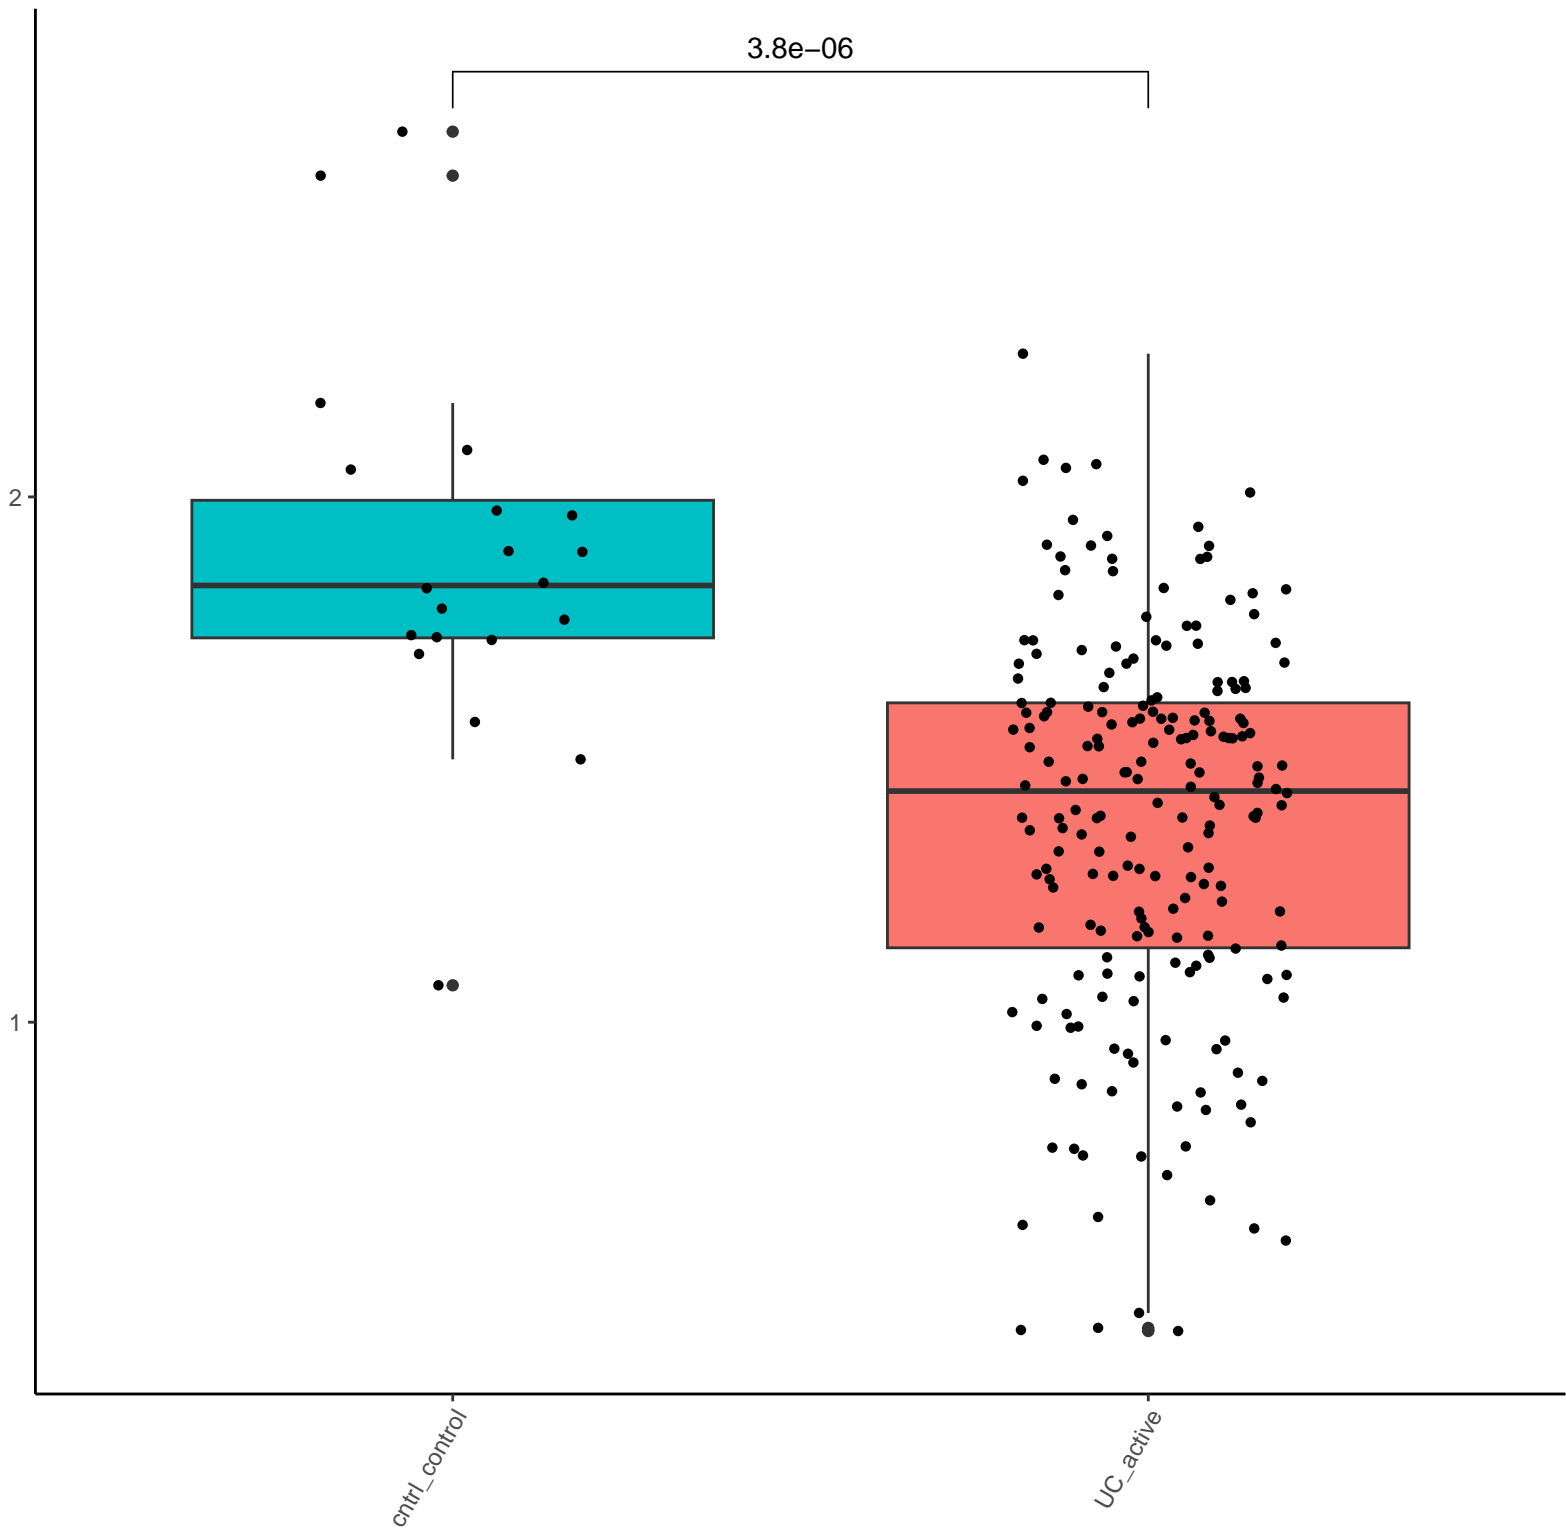



GSE128682

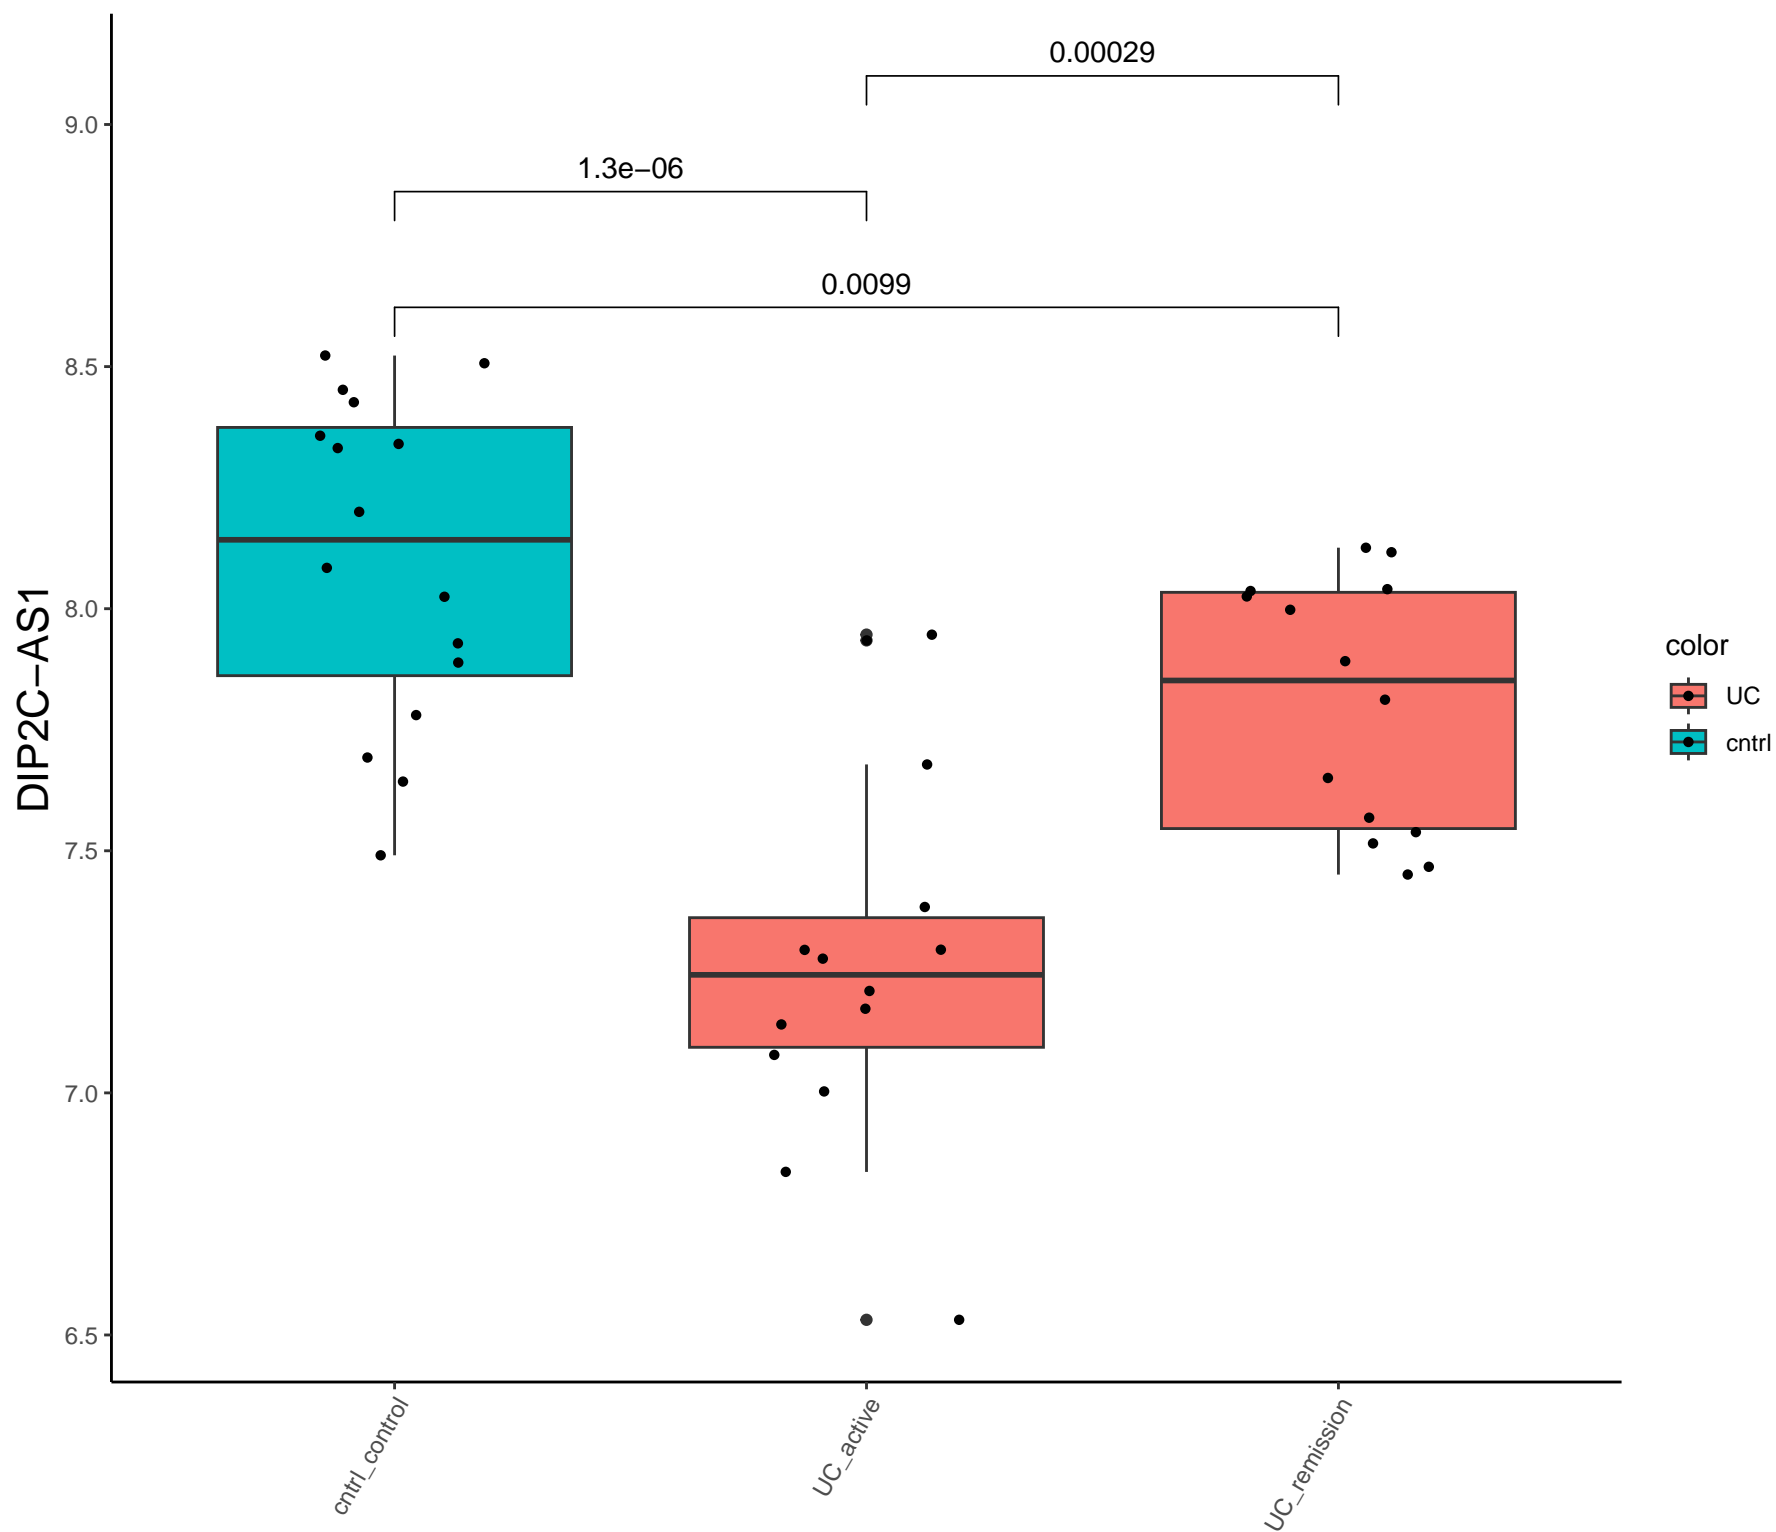

GSE16879

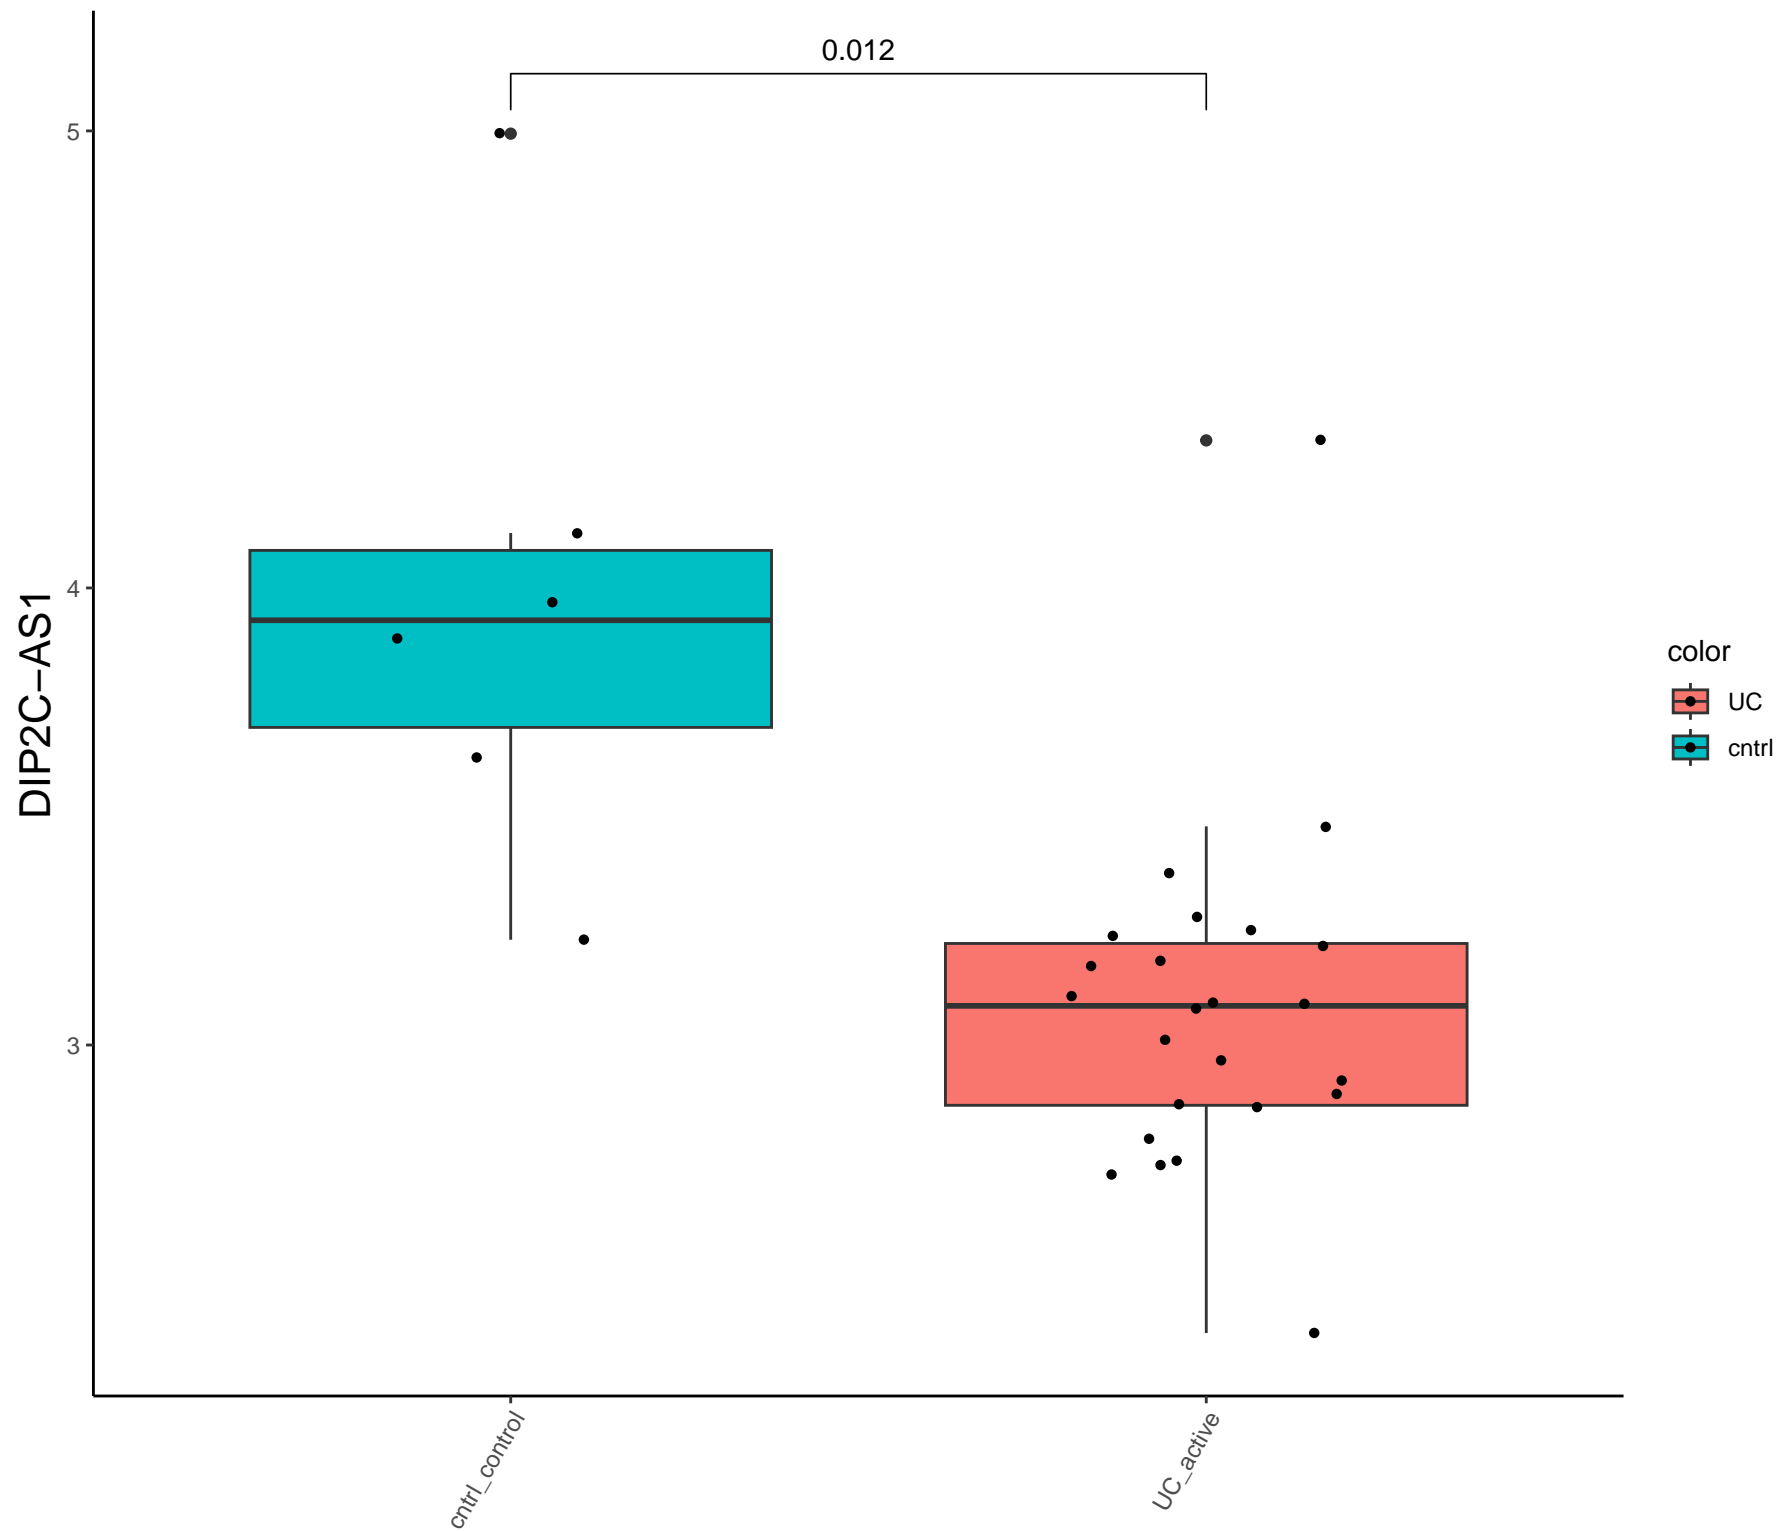

GSE206285

DIP2C-AS1

4.7e-11

color  
UC  
cntrl

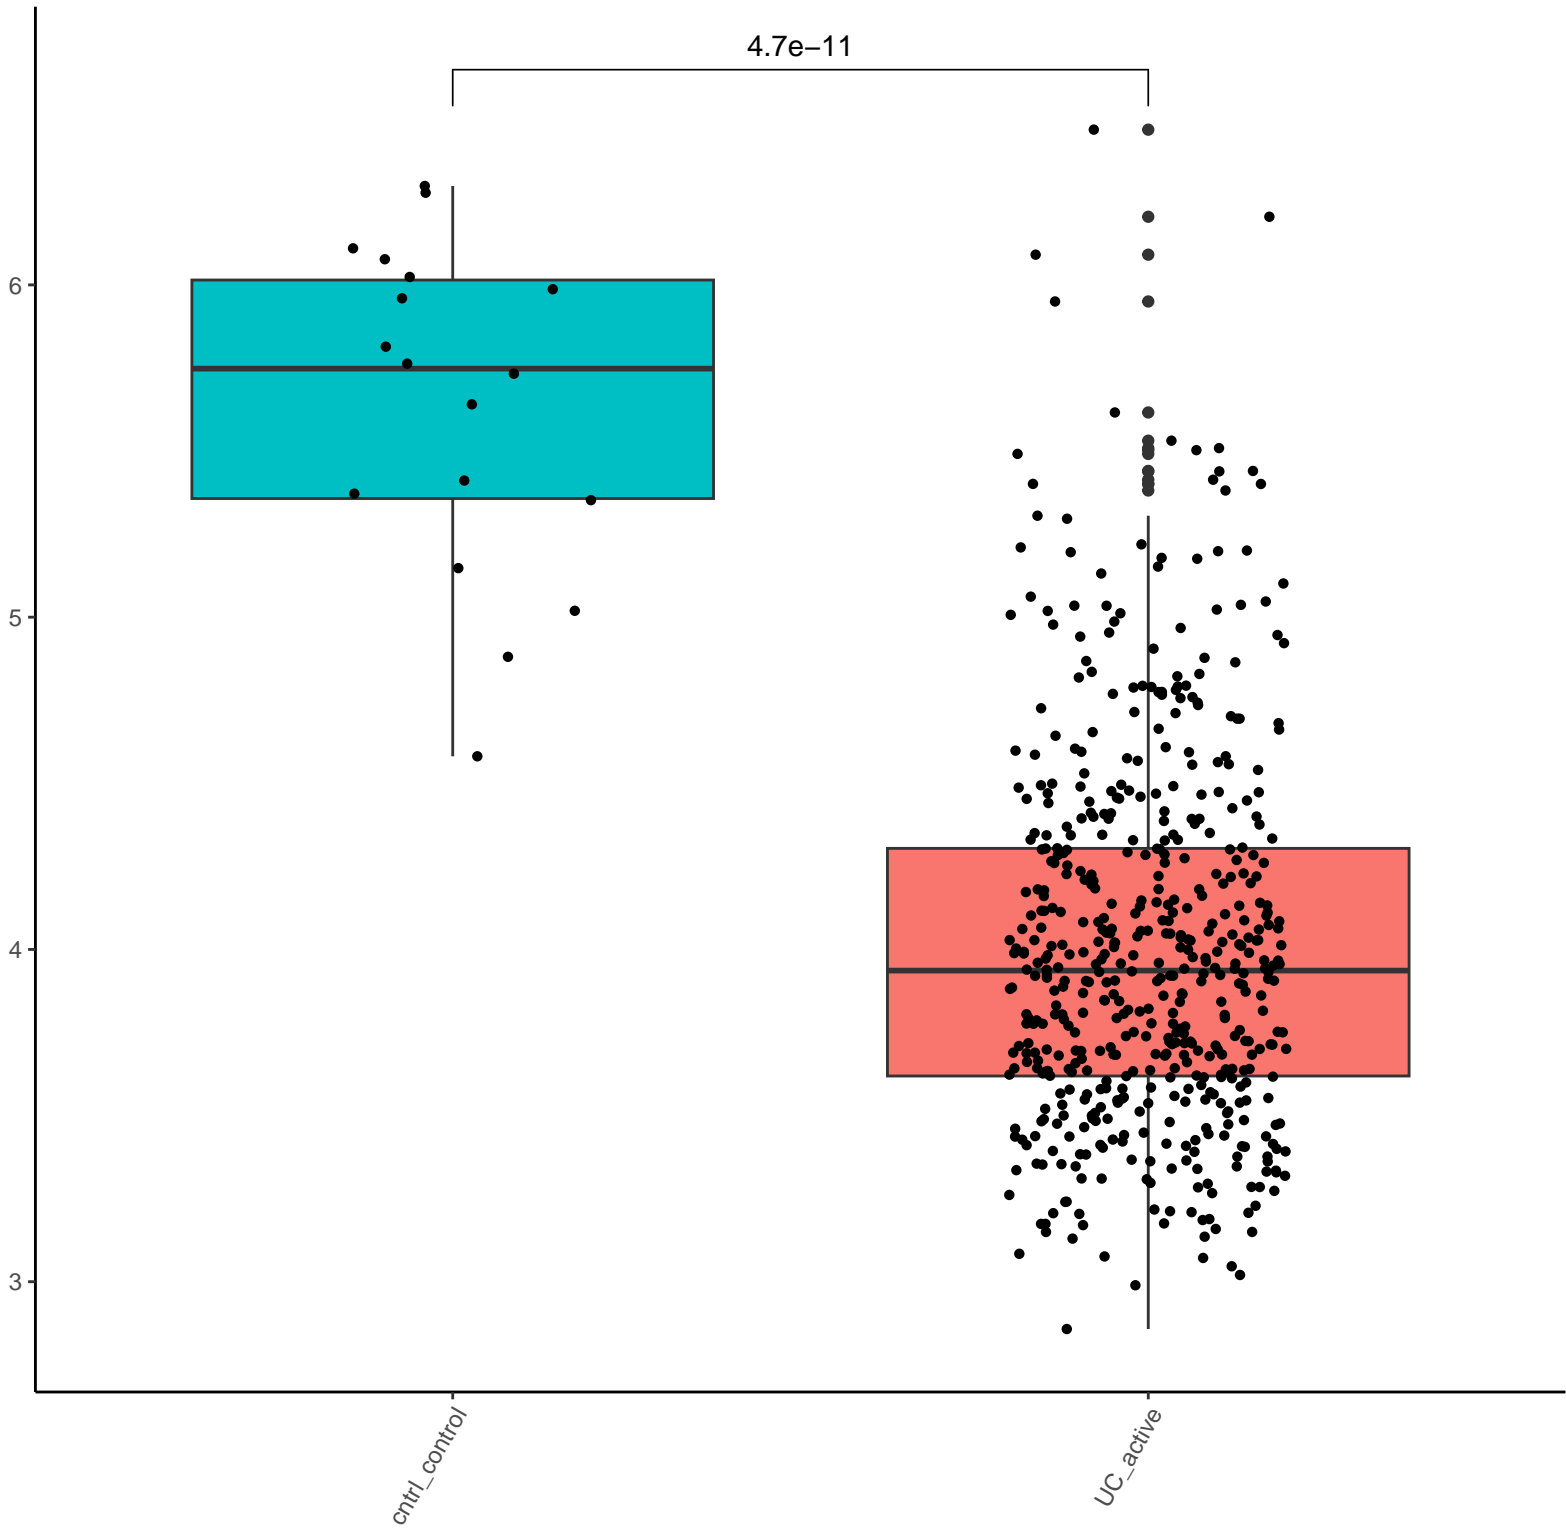

GSE59071

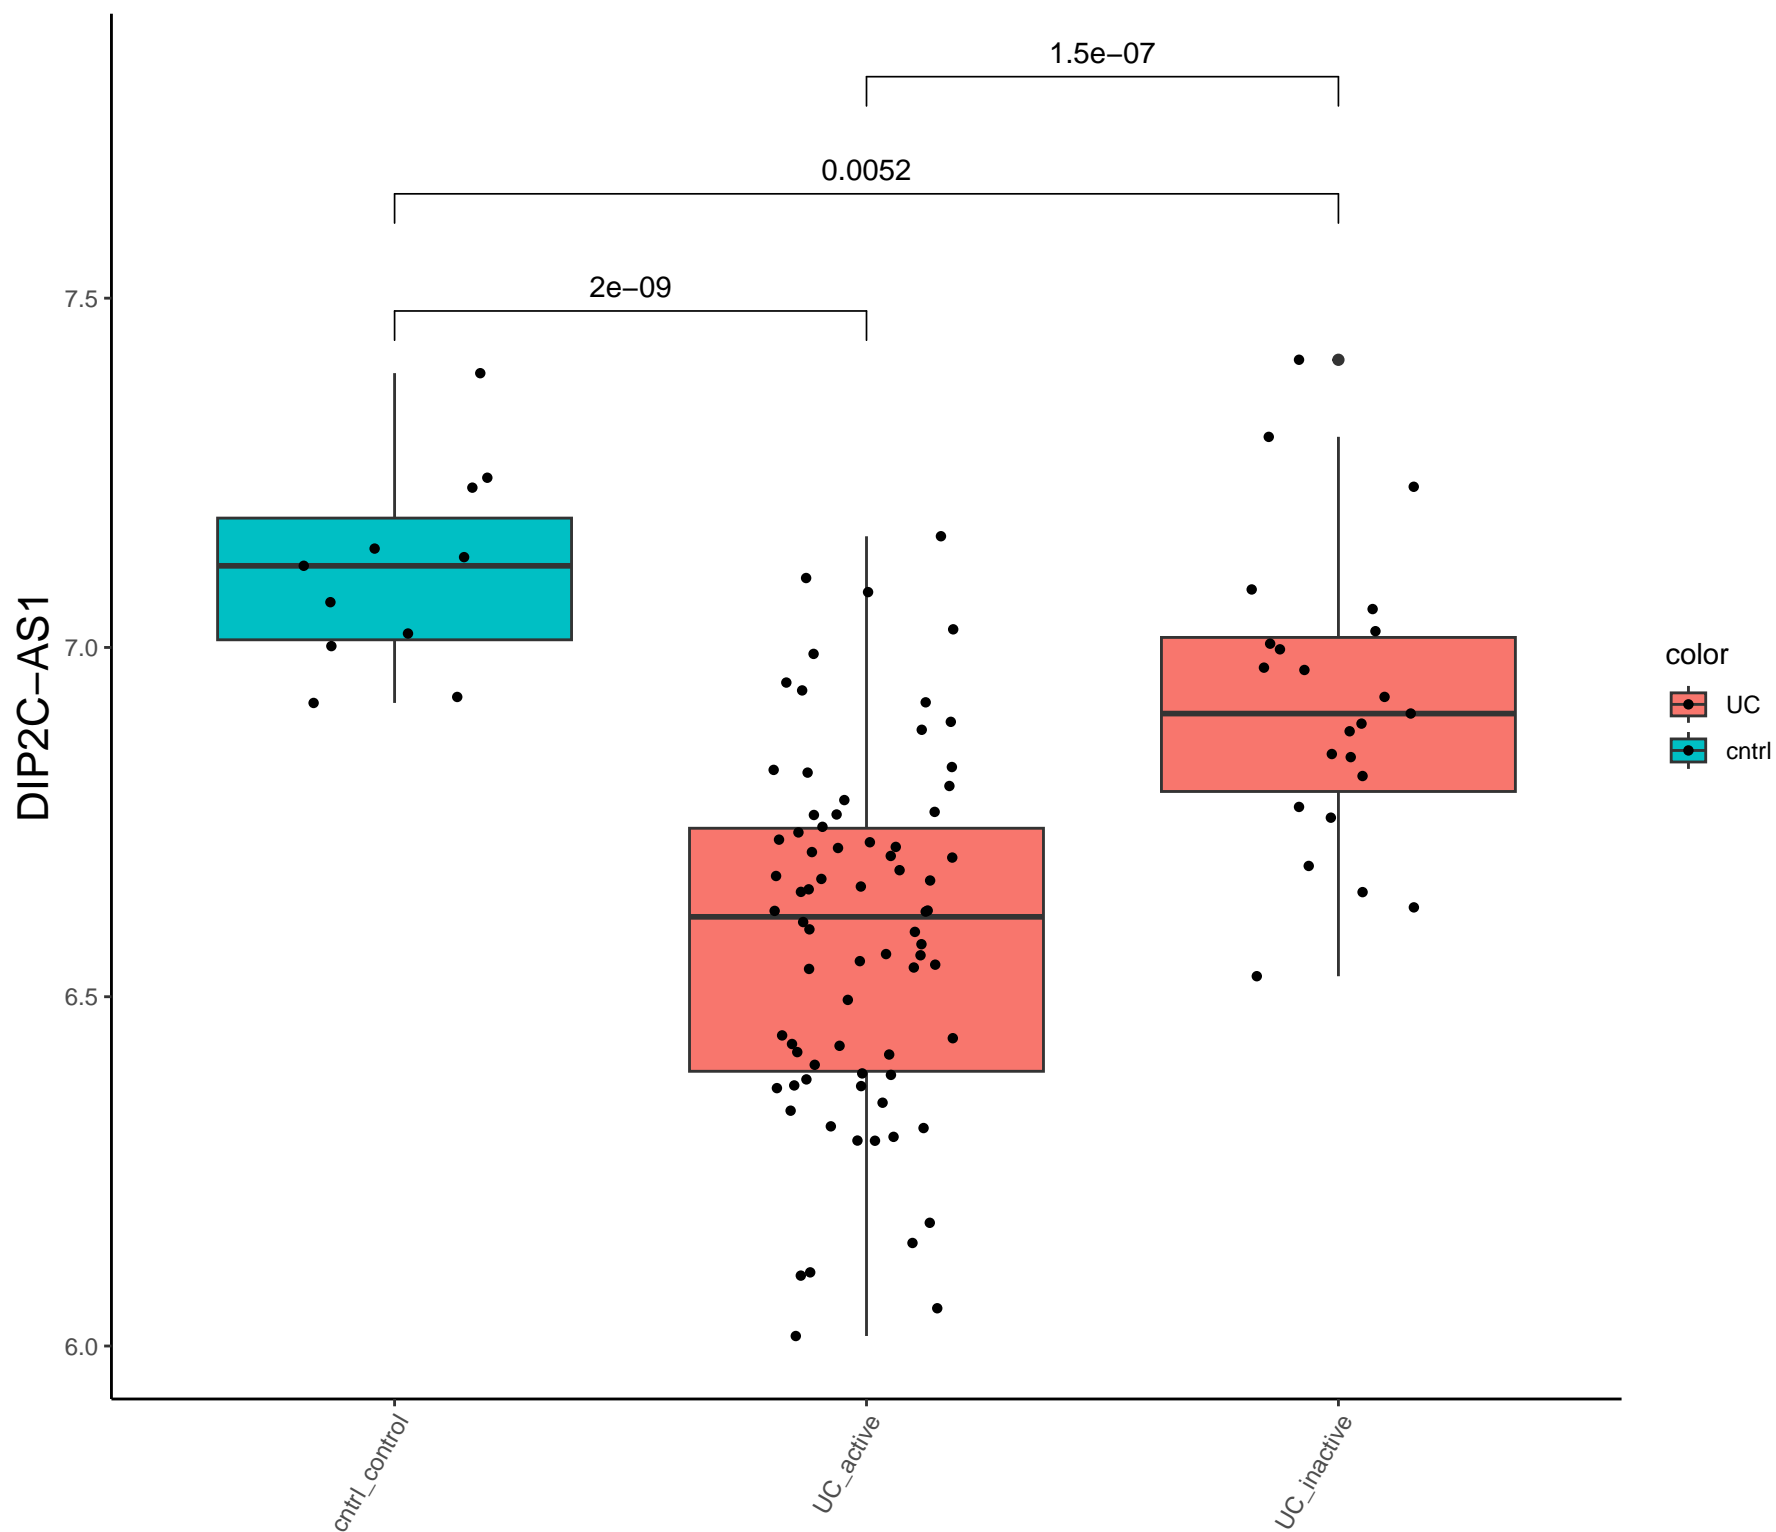

GSE92415

$p < 2.22\text{e-}16$

DIP2C-AS1

cntrl\_control

UC\_active

color

UC  
cntrl

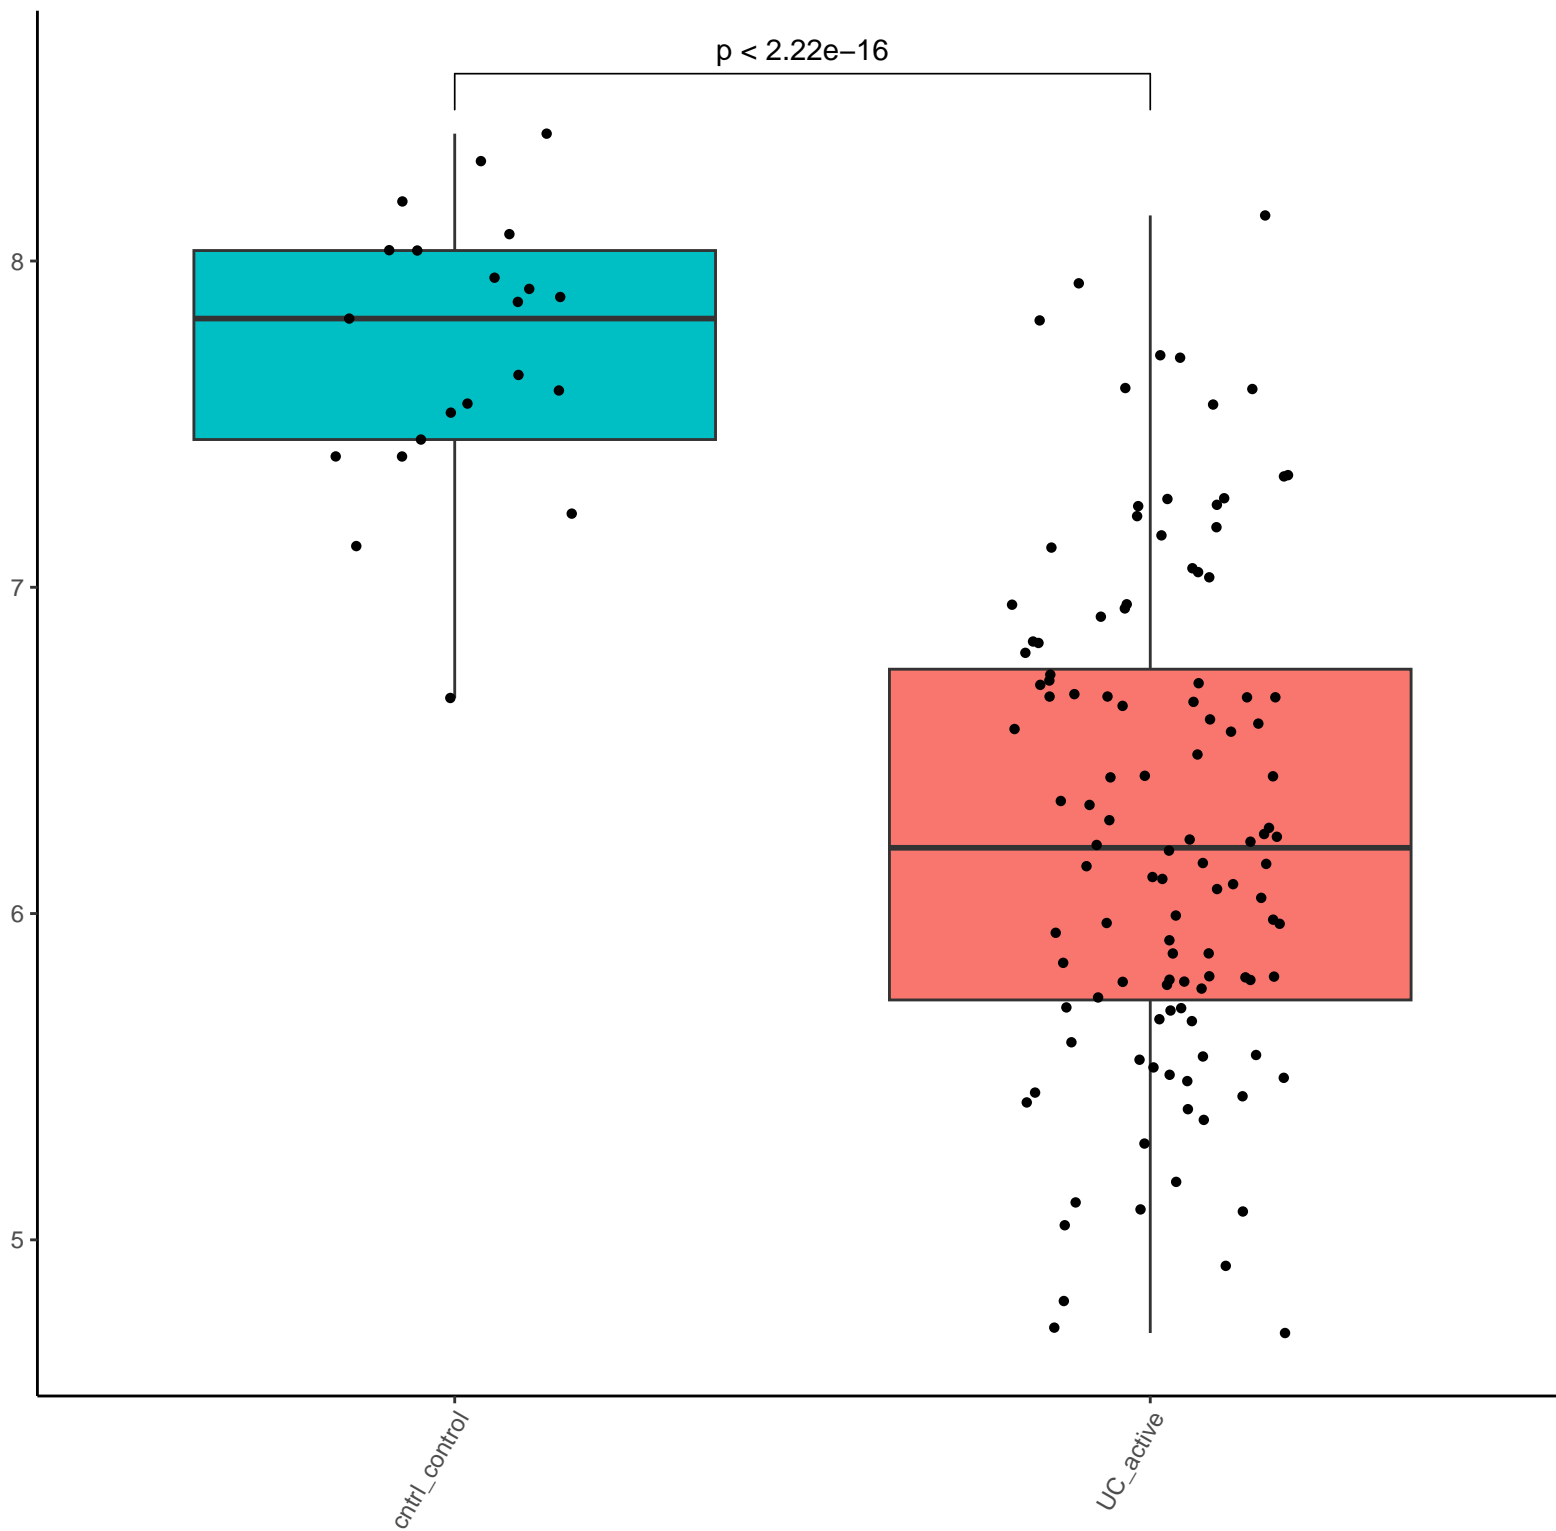

GSE109142

DPP10-AS1

$p < 2.22e-16$

color

UC

cntrl

cntrl\_control

UC\_active

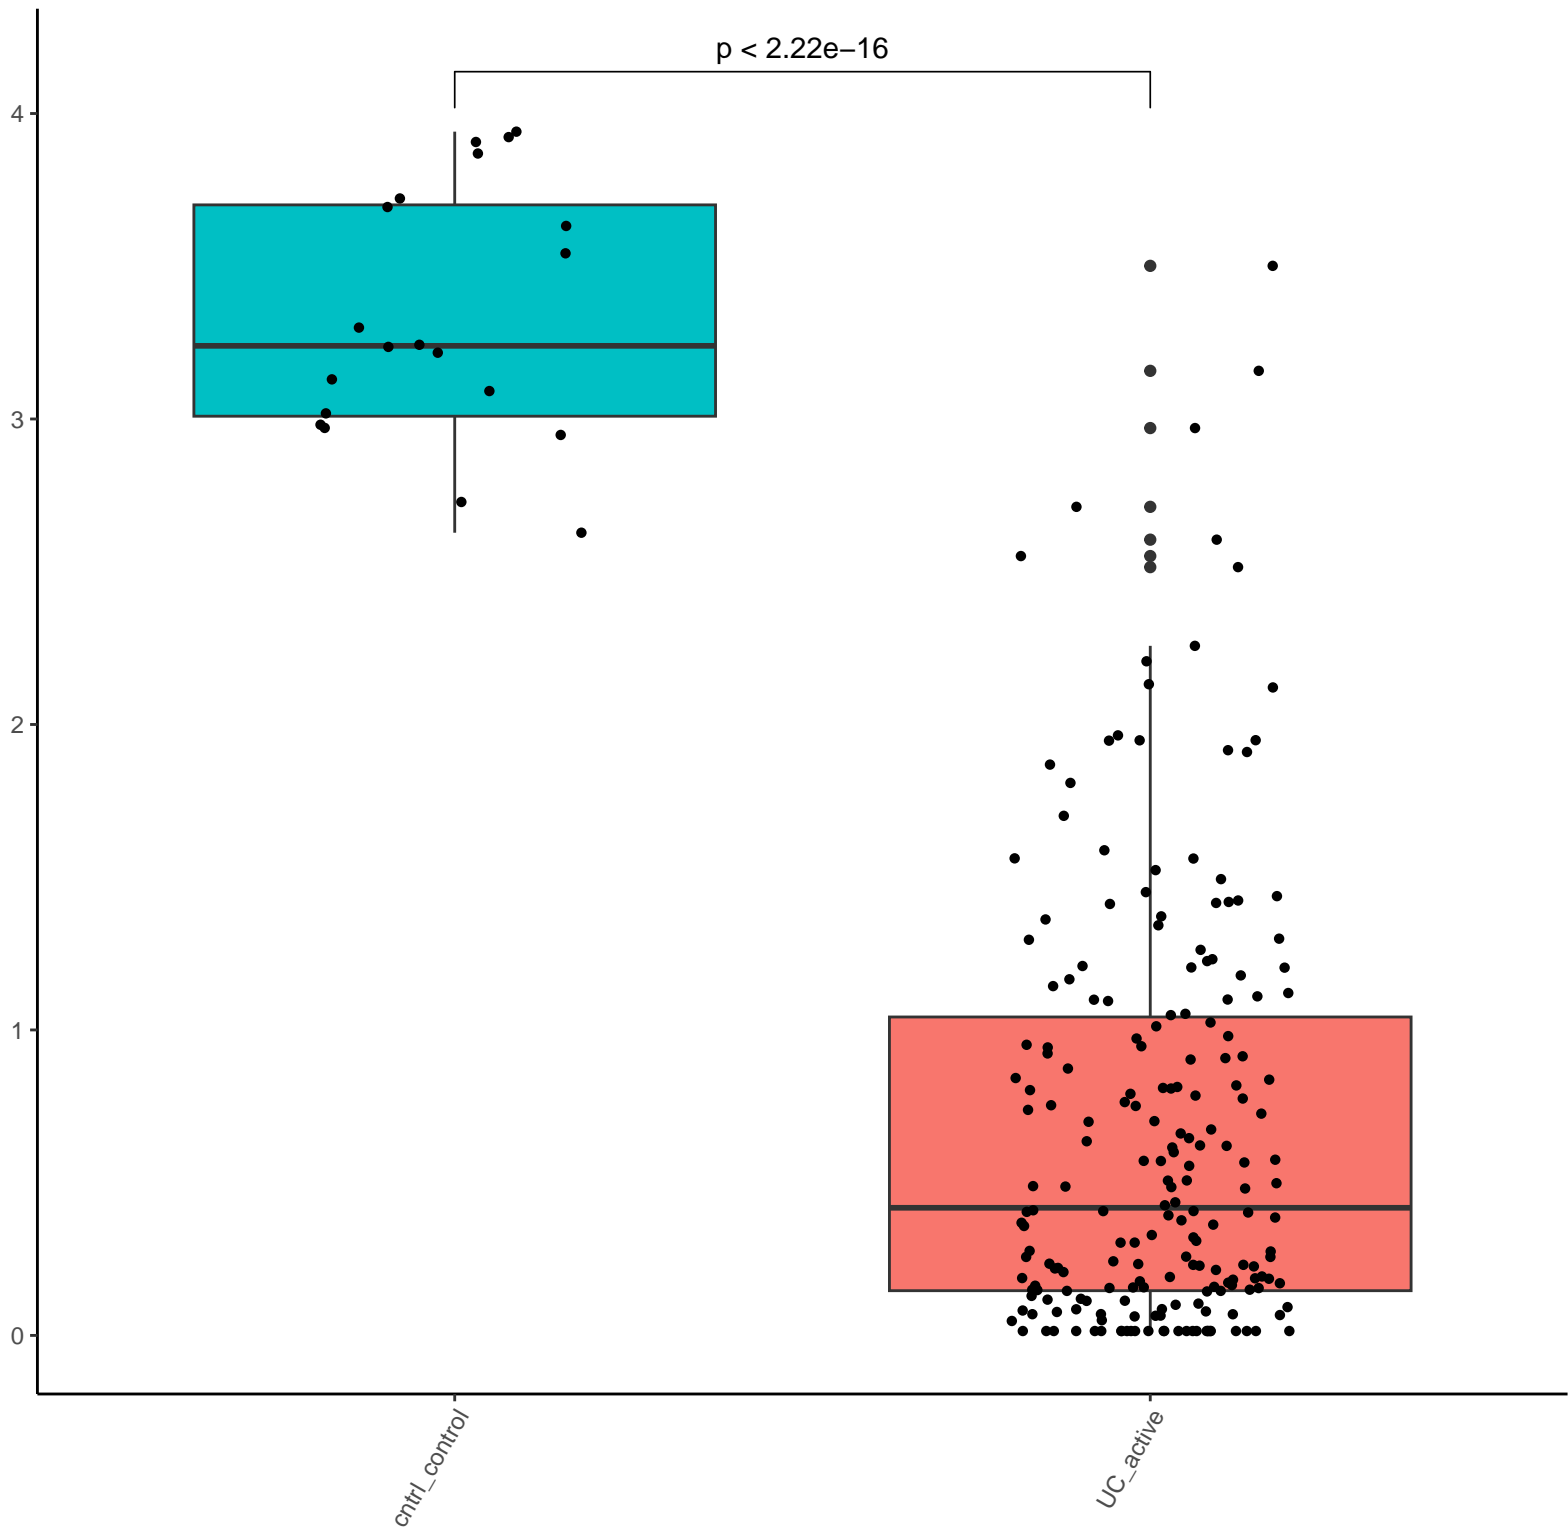

GSE128682

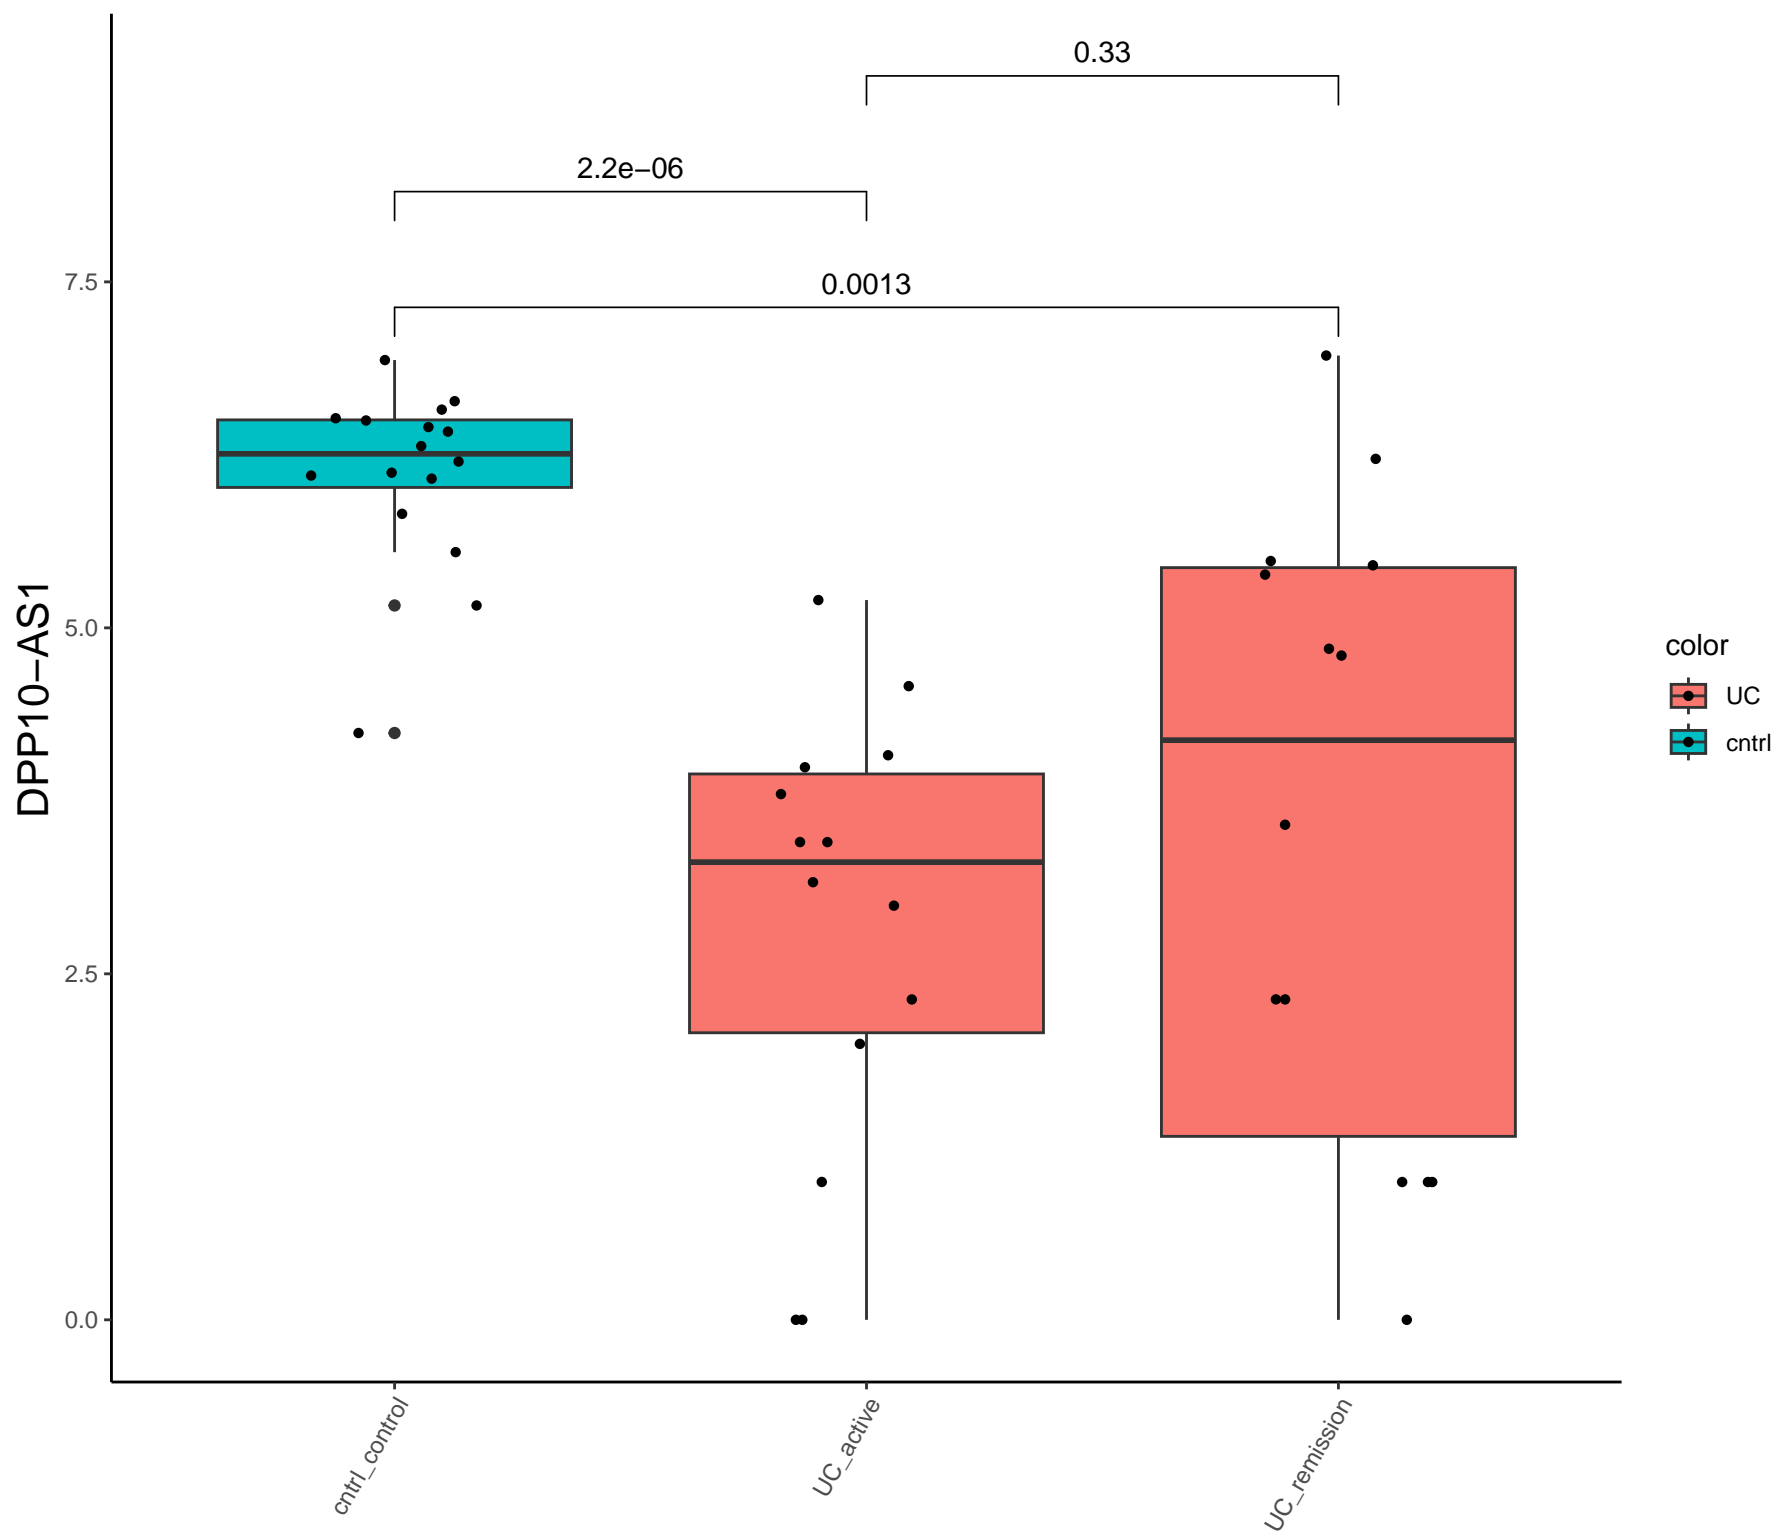

GSE16879

DPP10-AS1

0.0039

color

UC  
cntrl

cntrl\_control

UC\_active

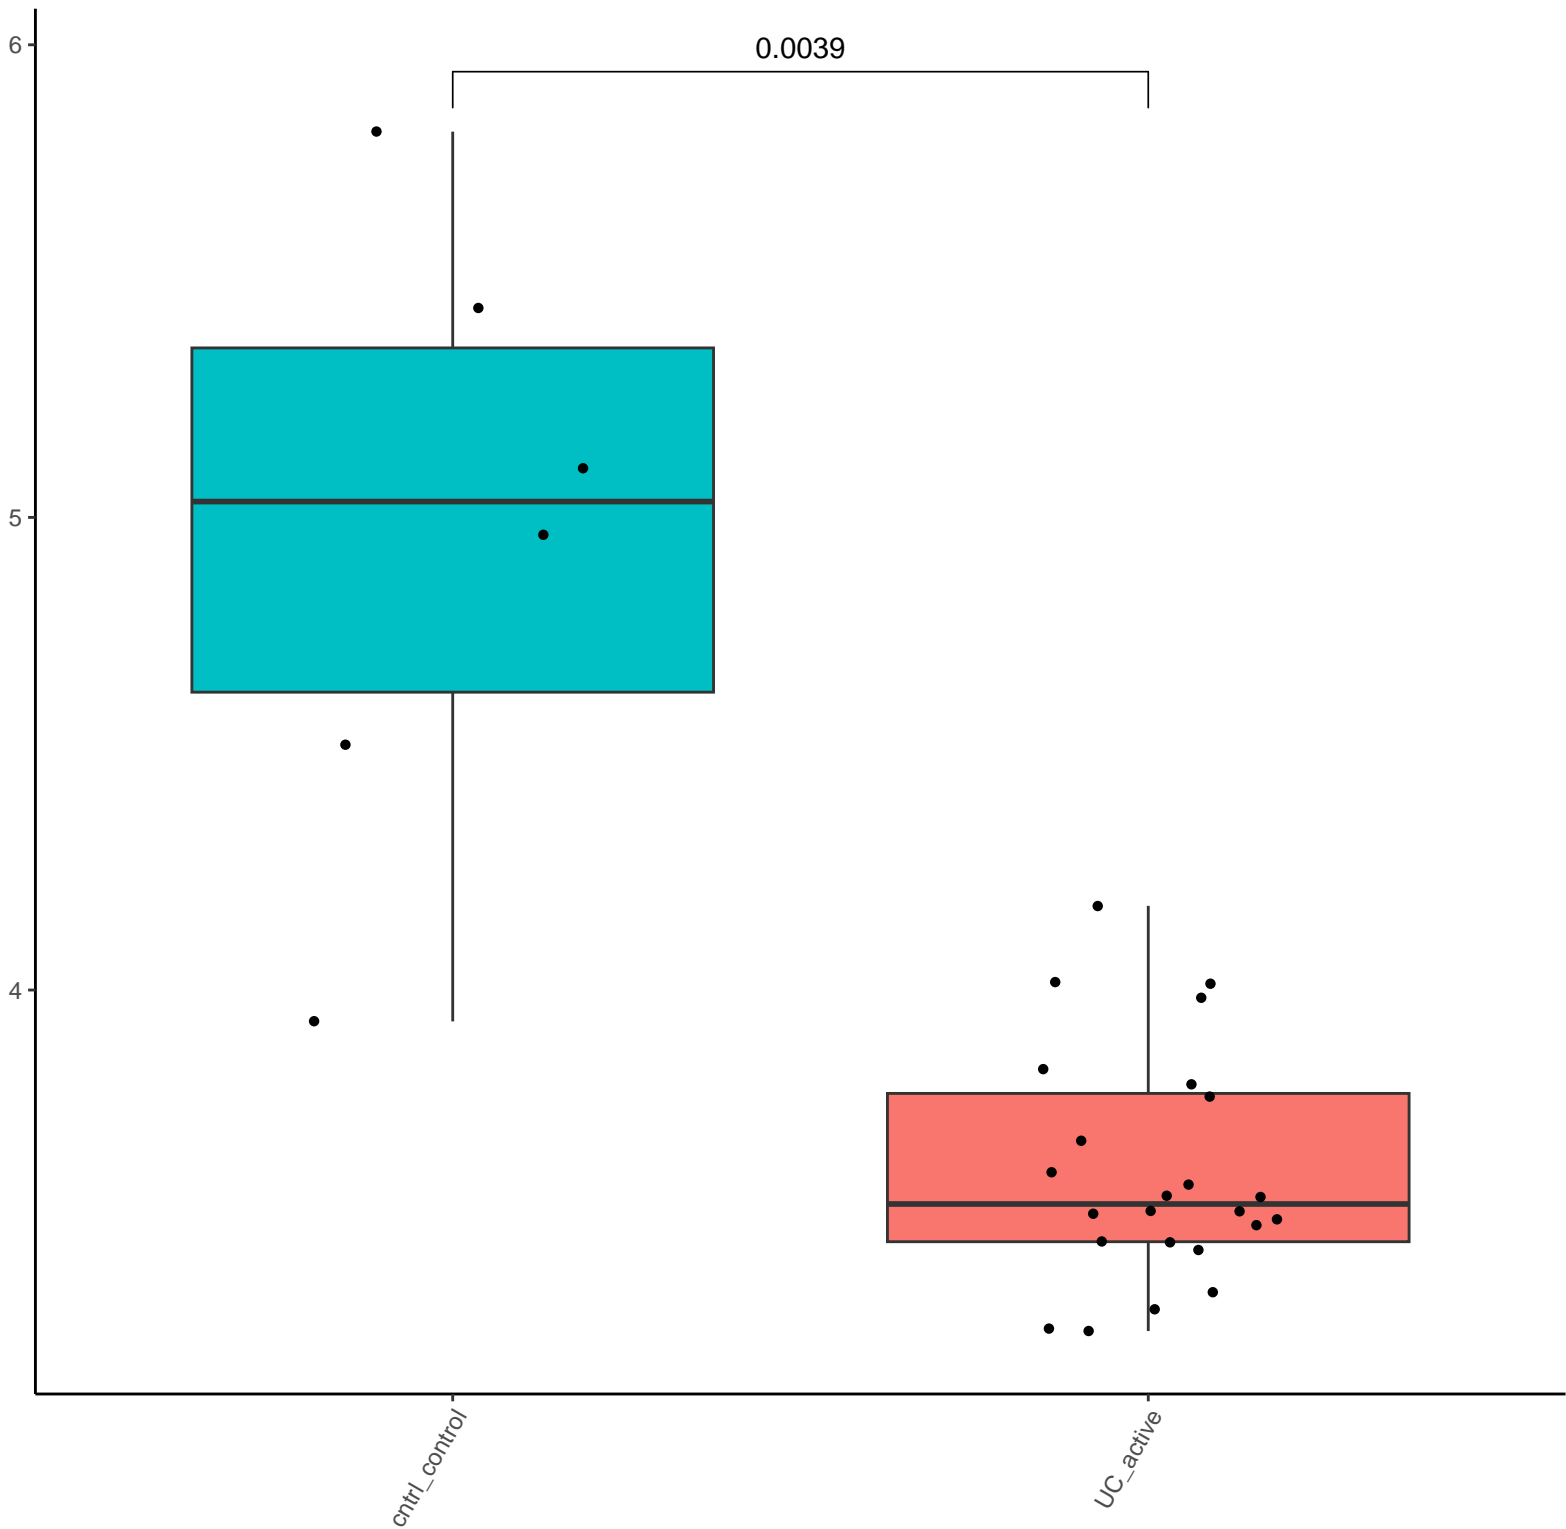



GSE206285

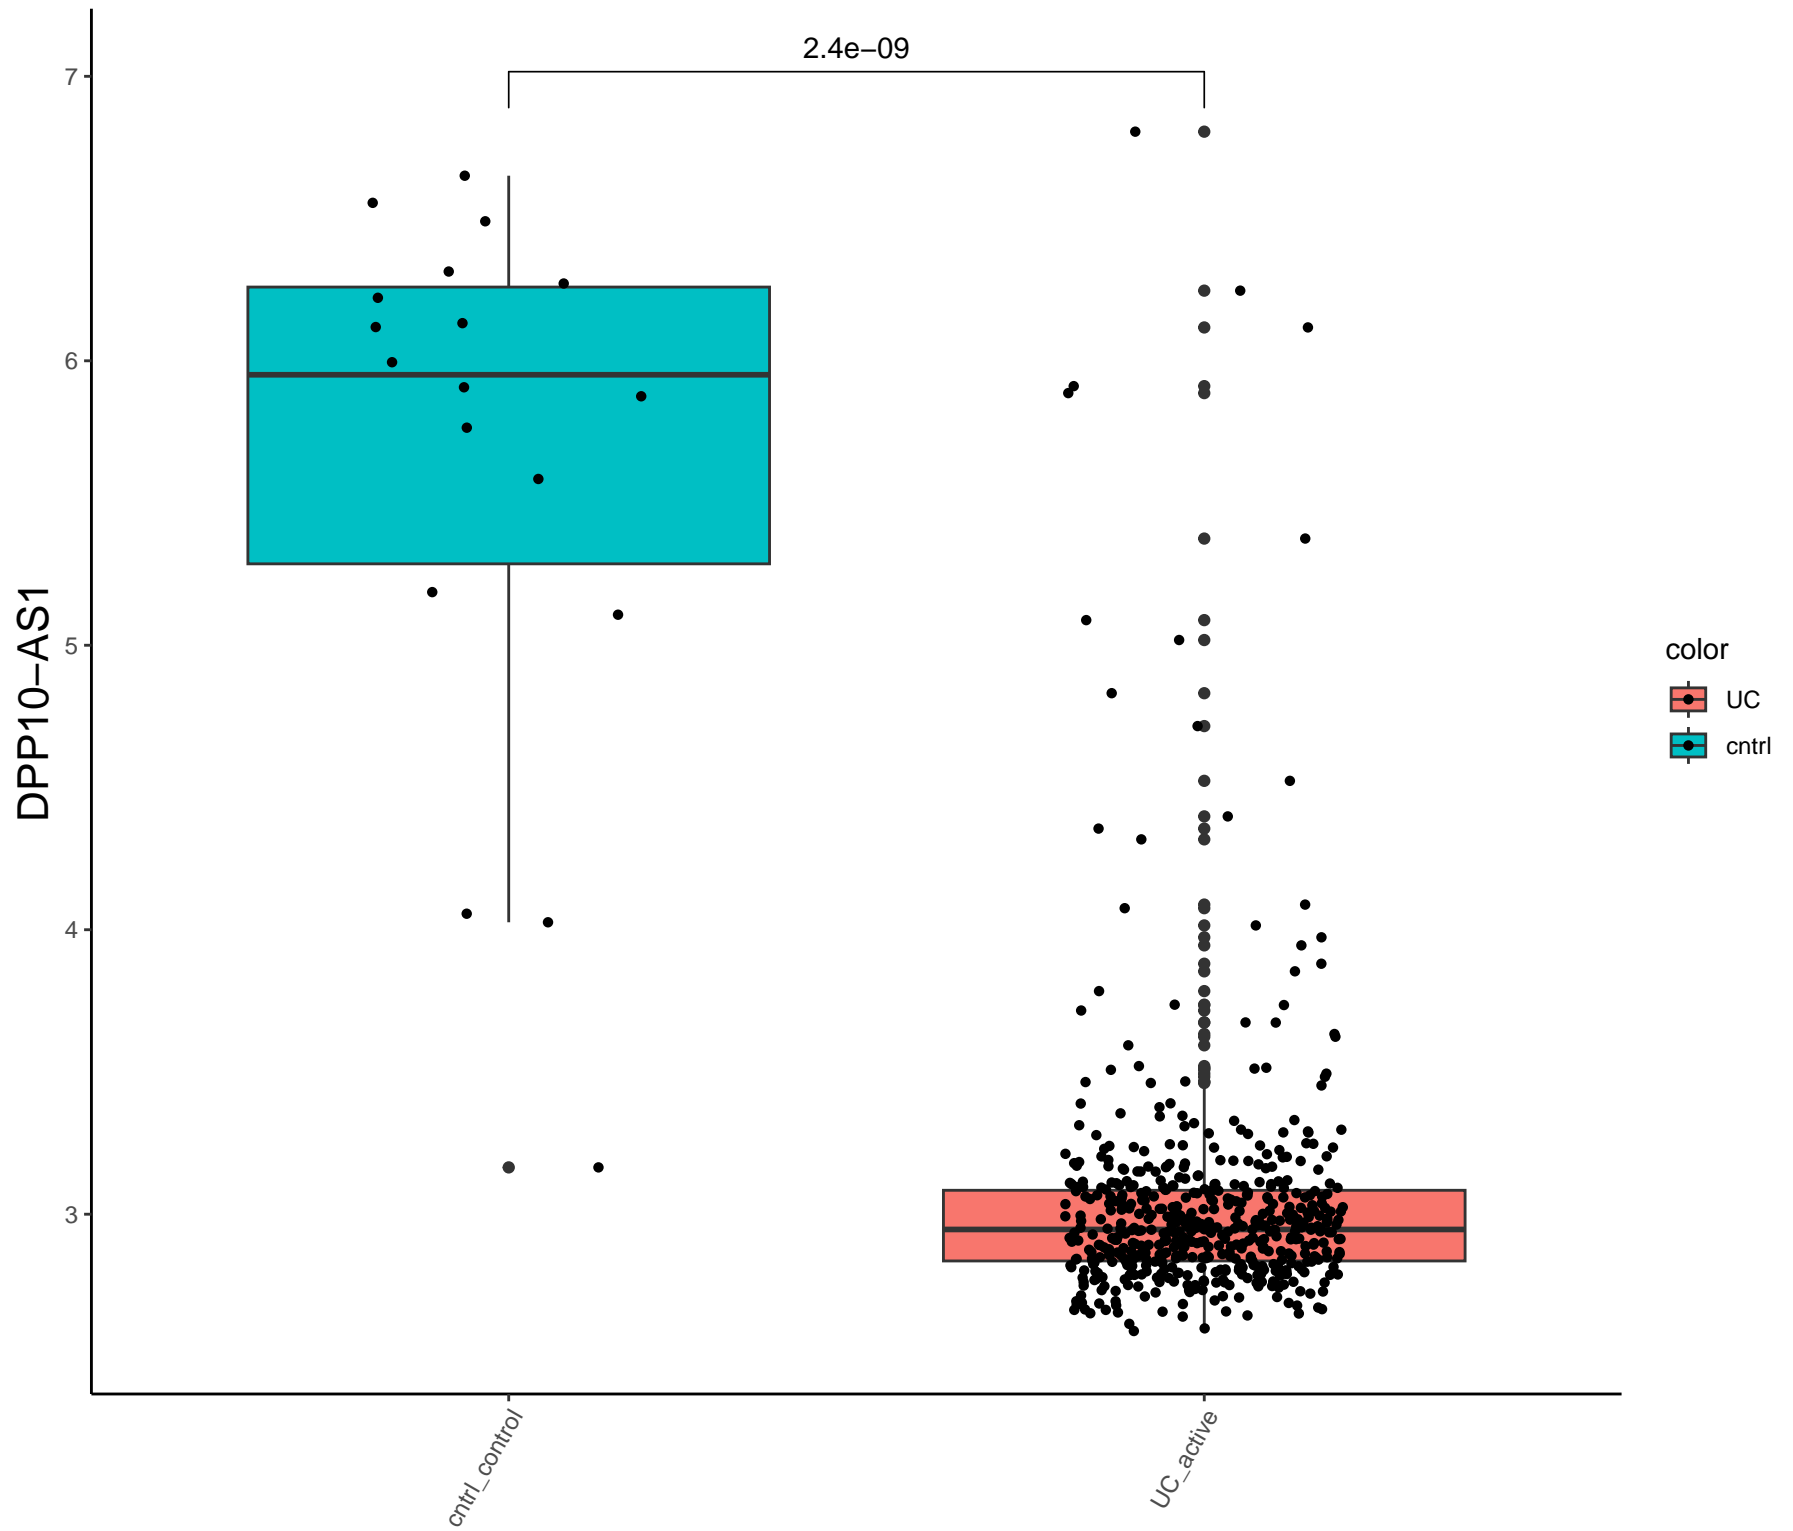

GSE47908

DPP10-AS1

1e-15

color

UC  
cntrl

cntrl\_control

UC\_active

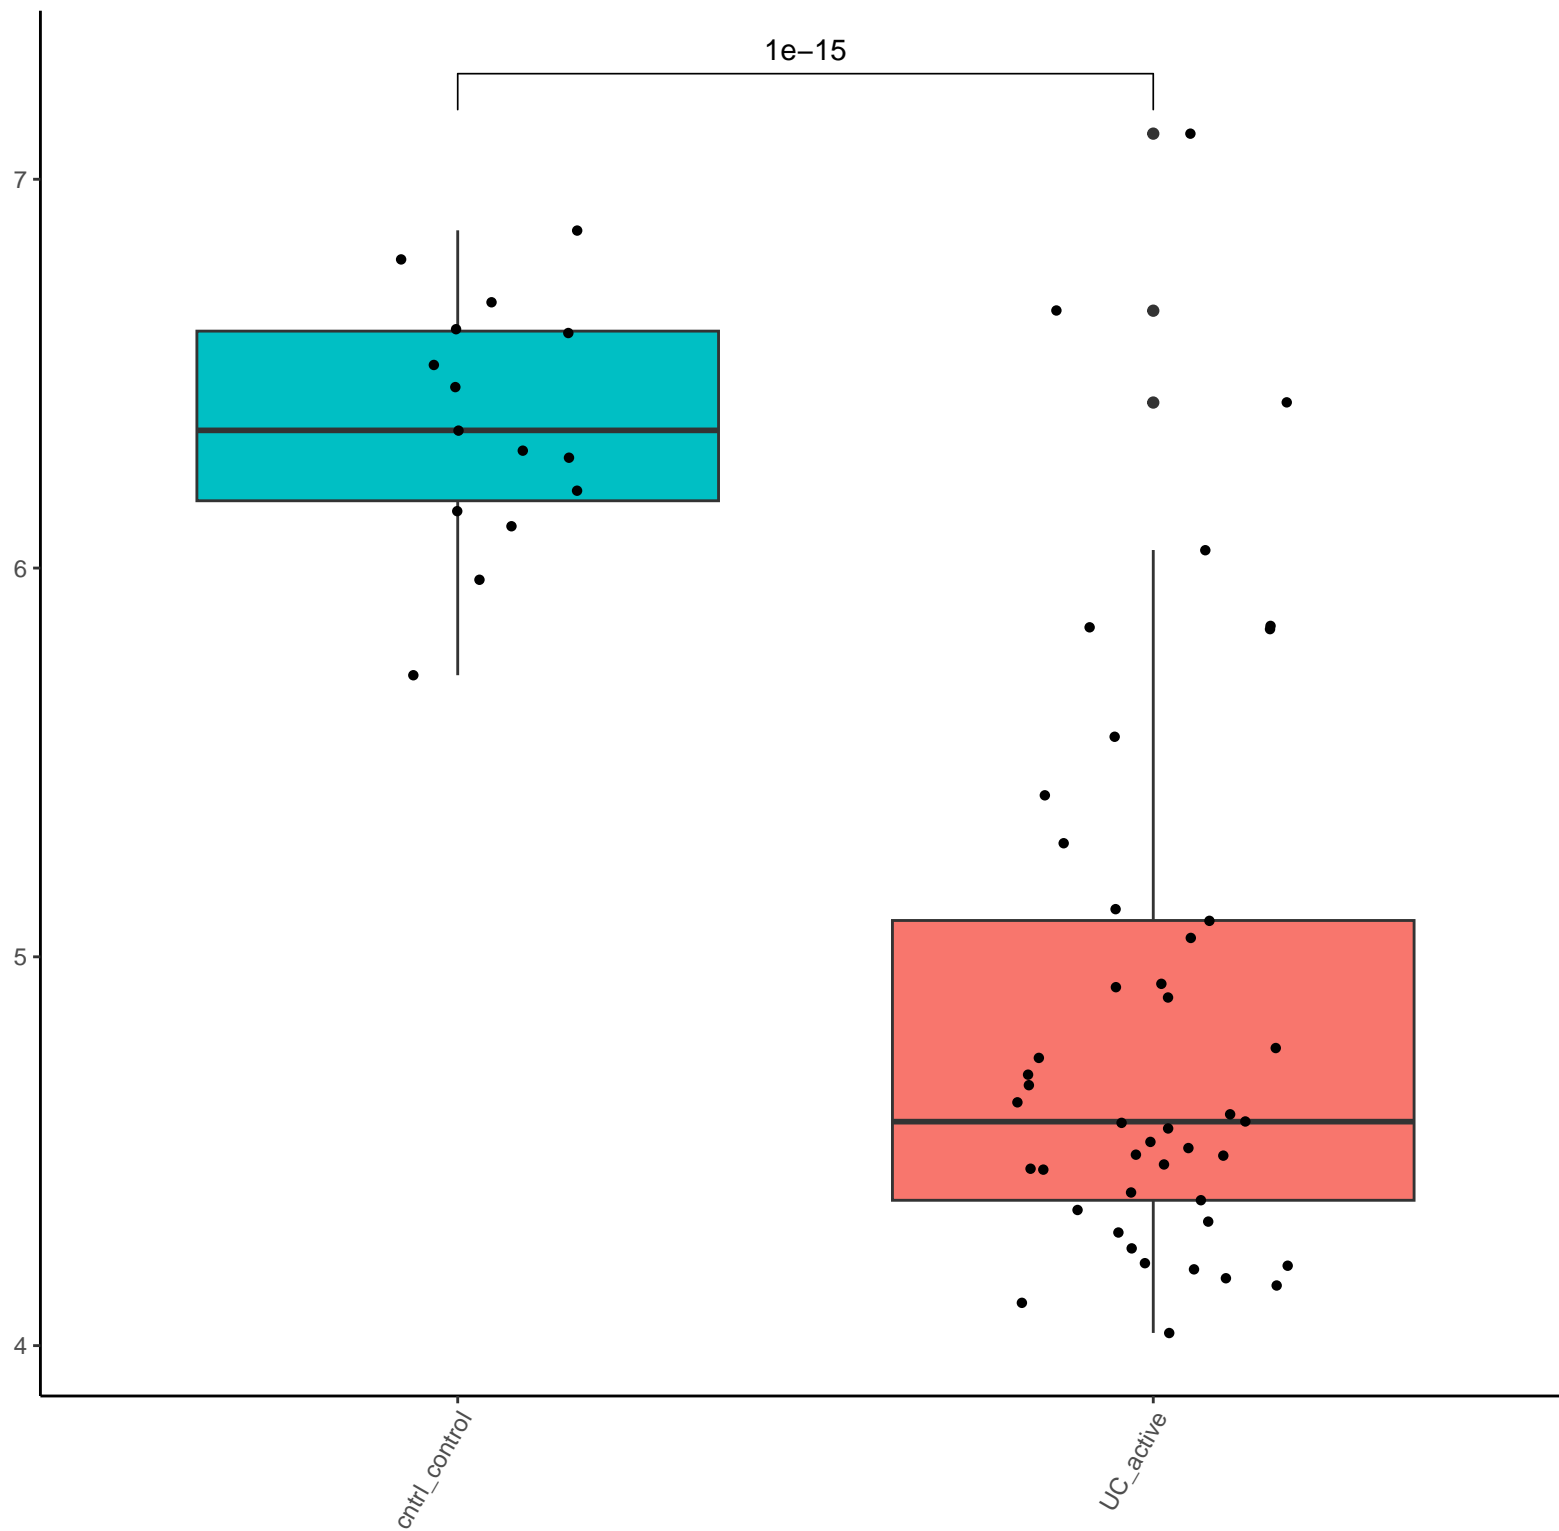

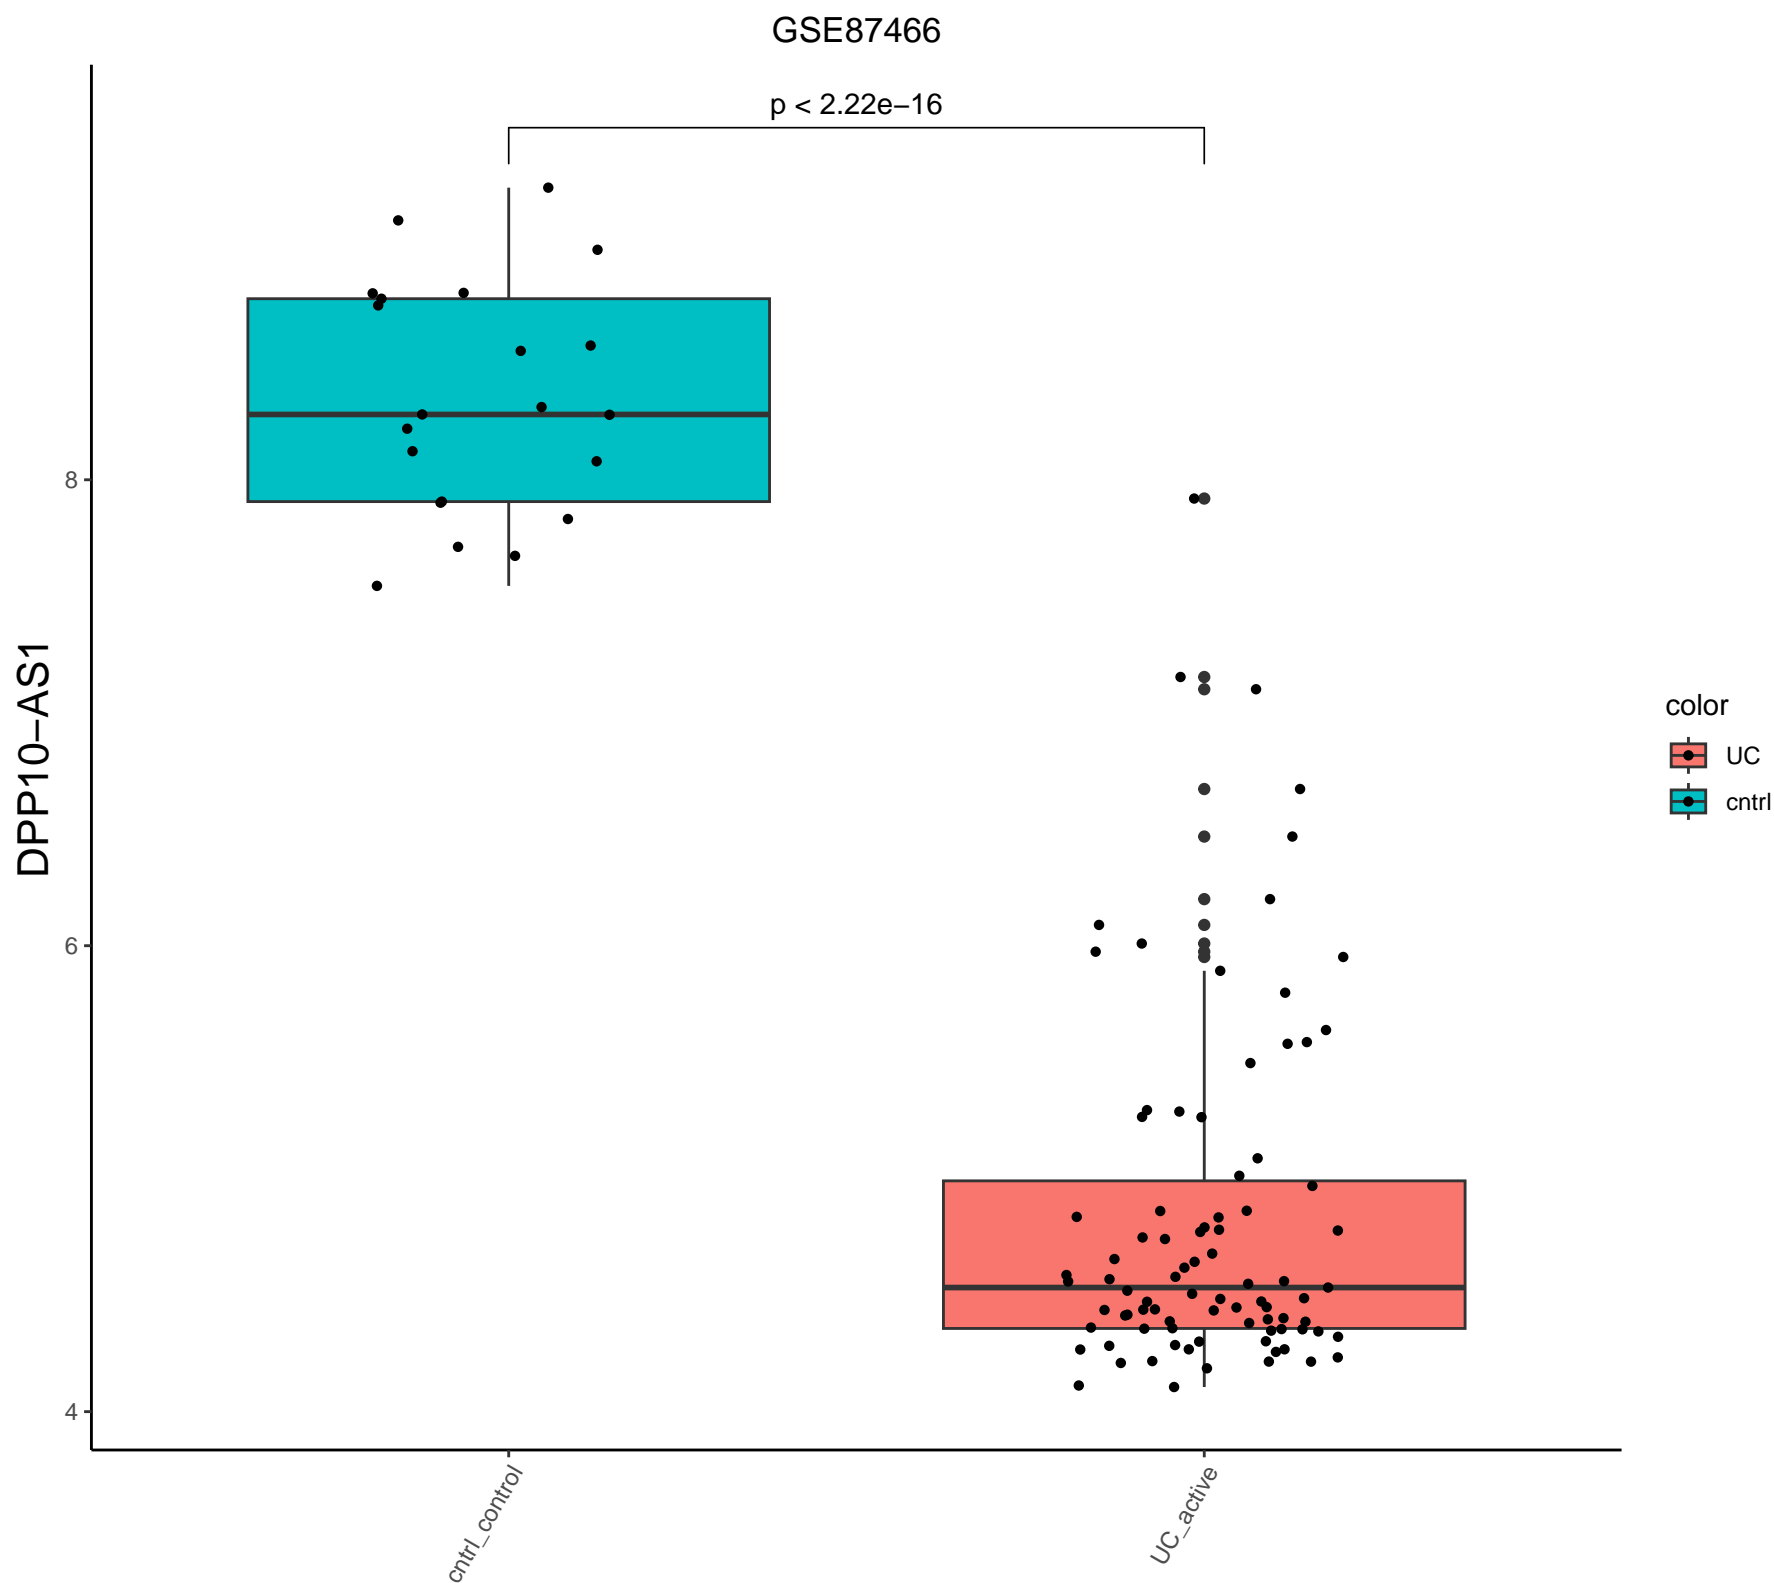

GSE107499

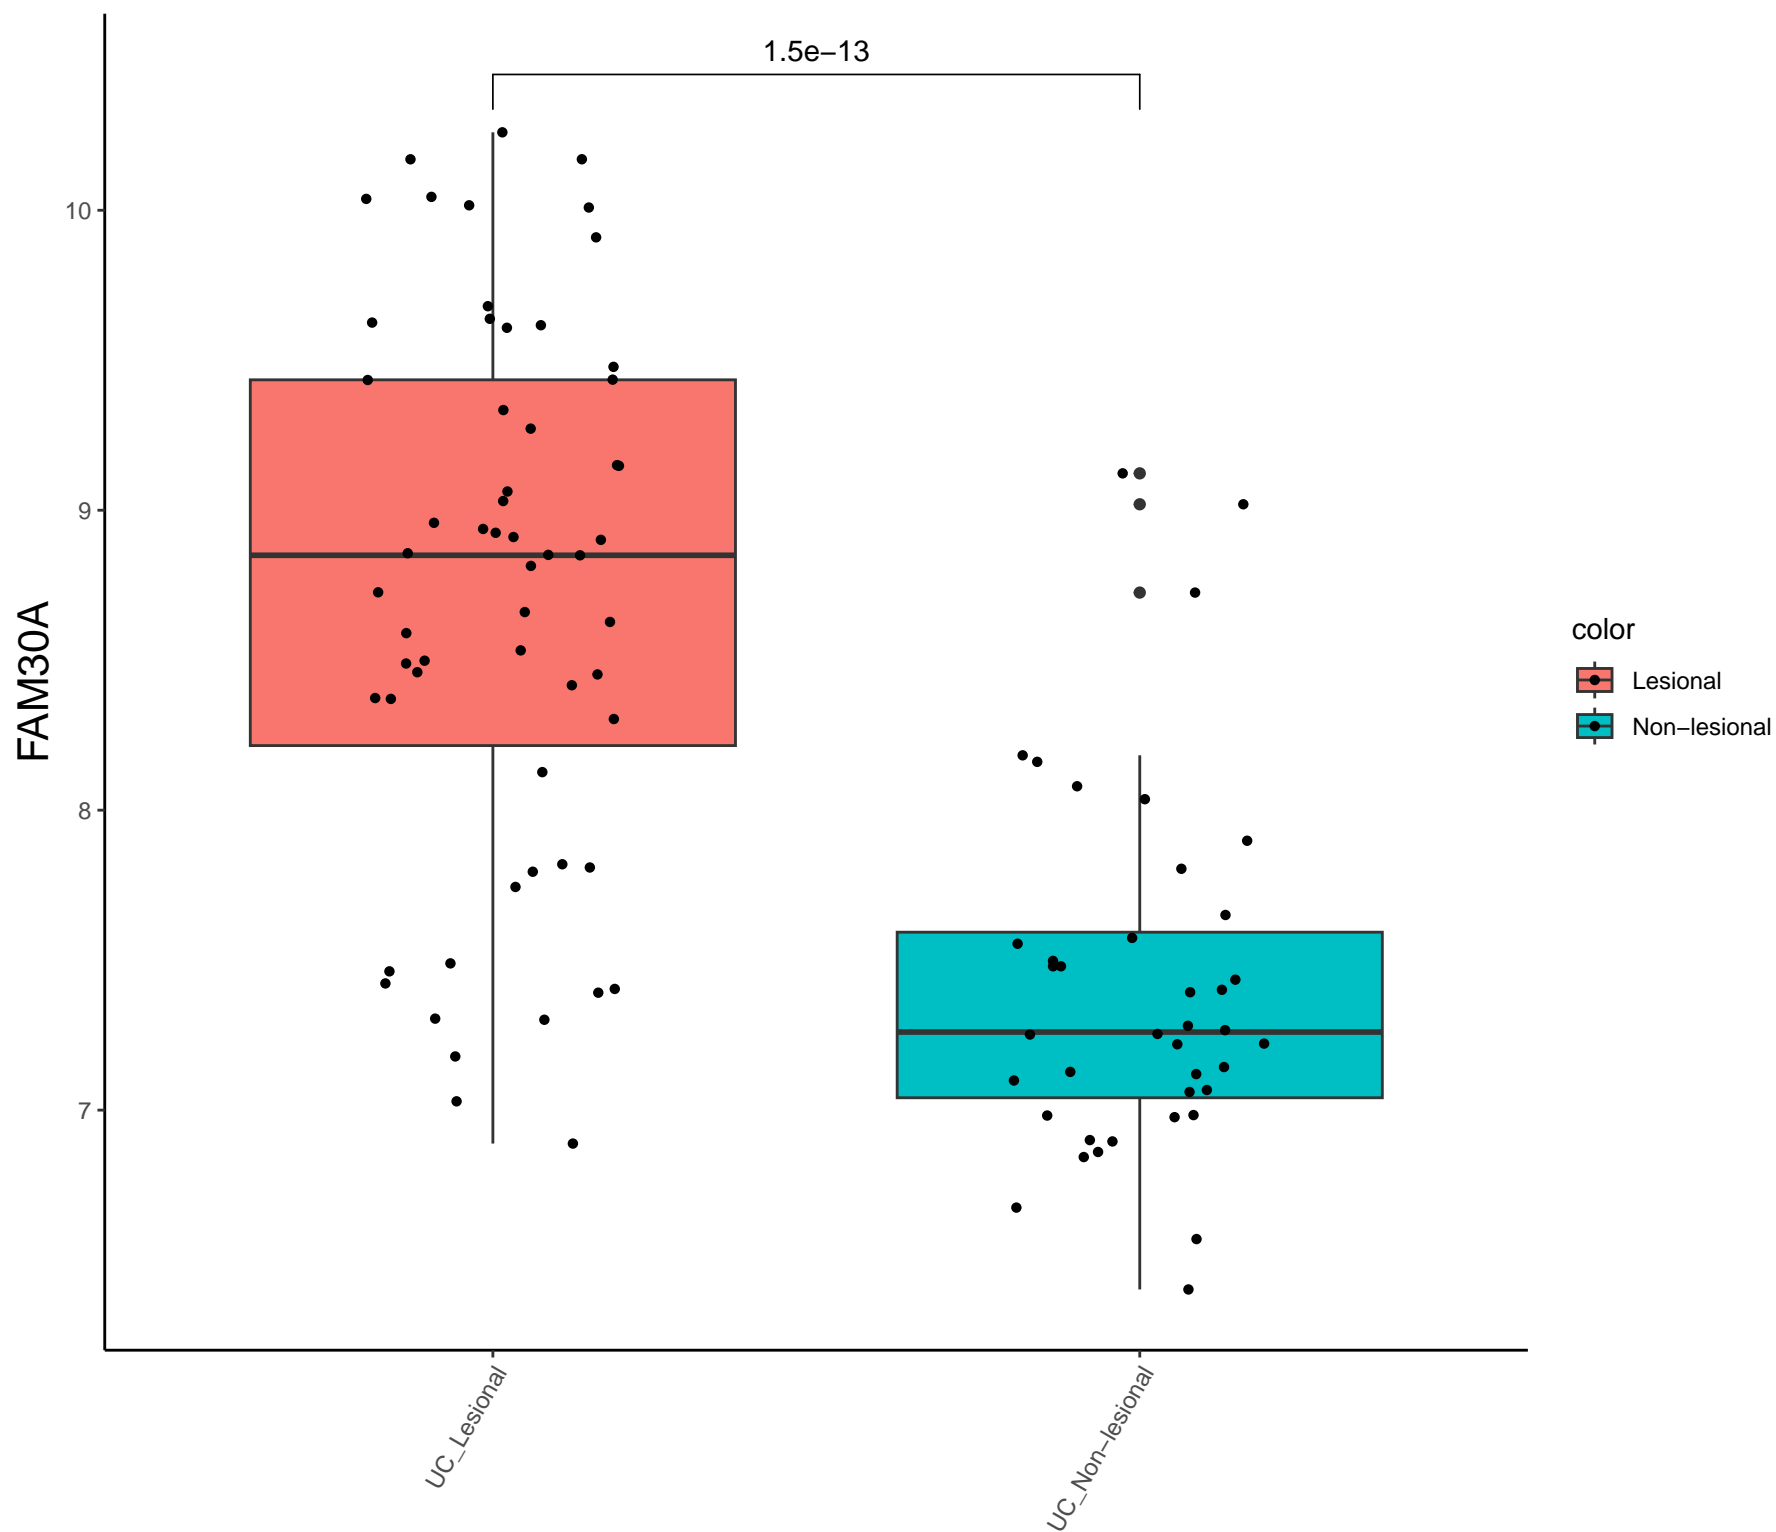

GSE109142

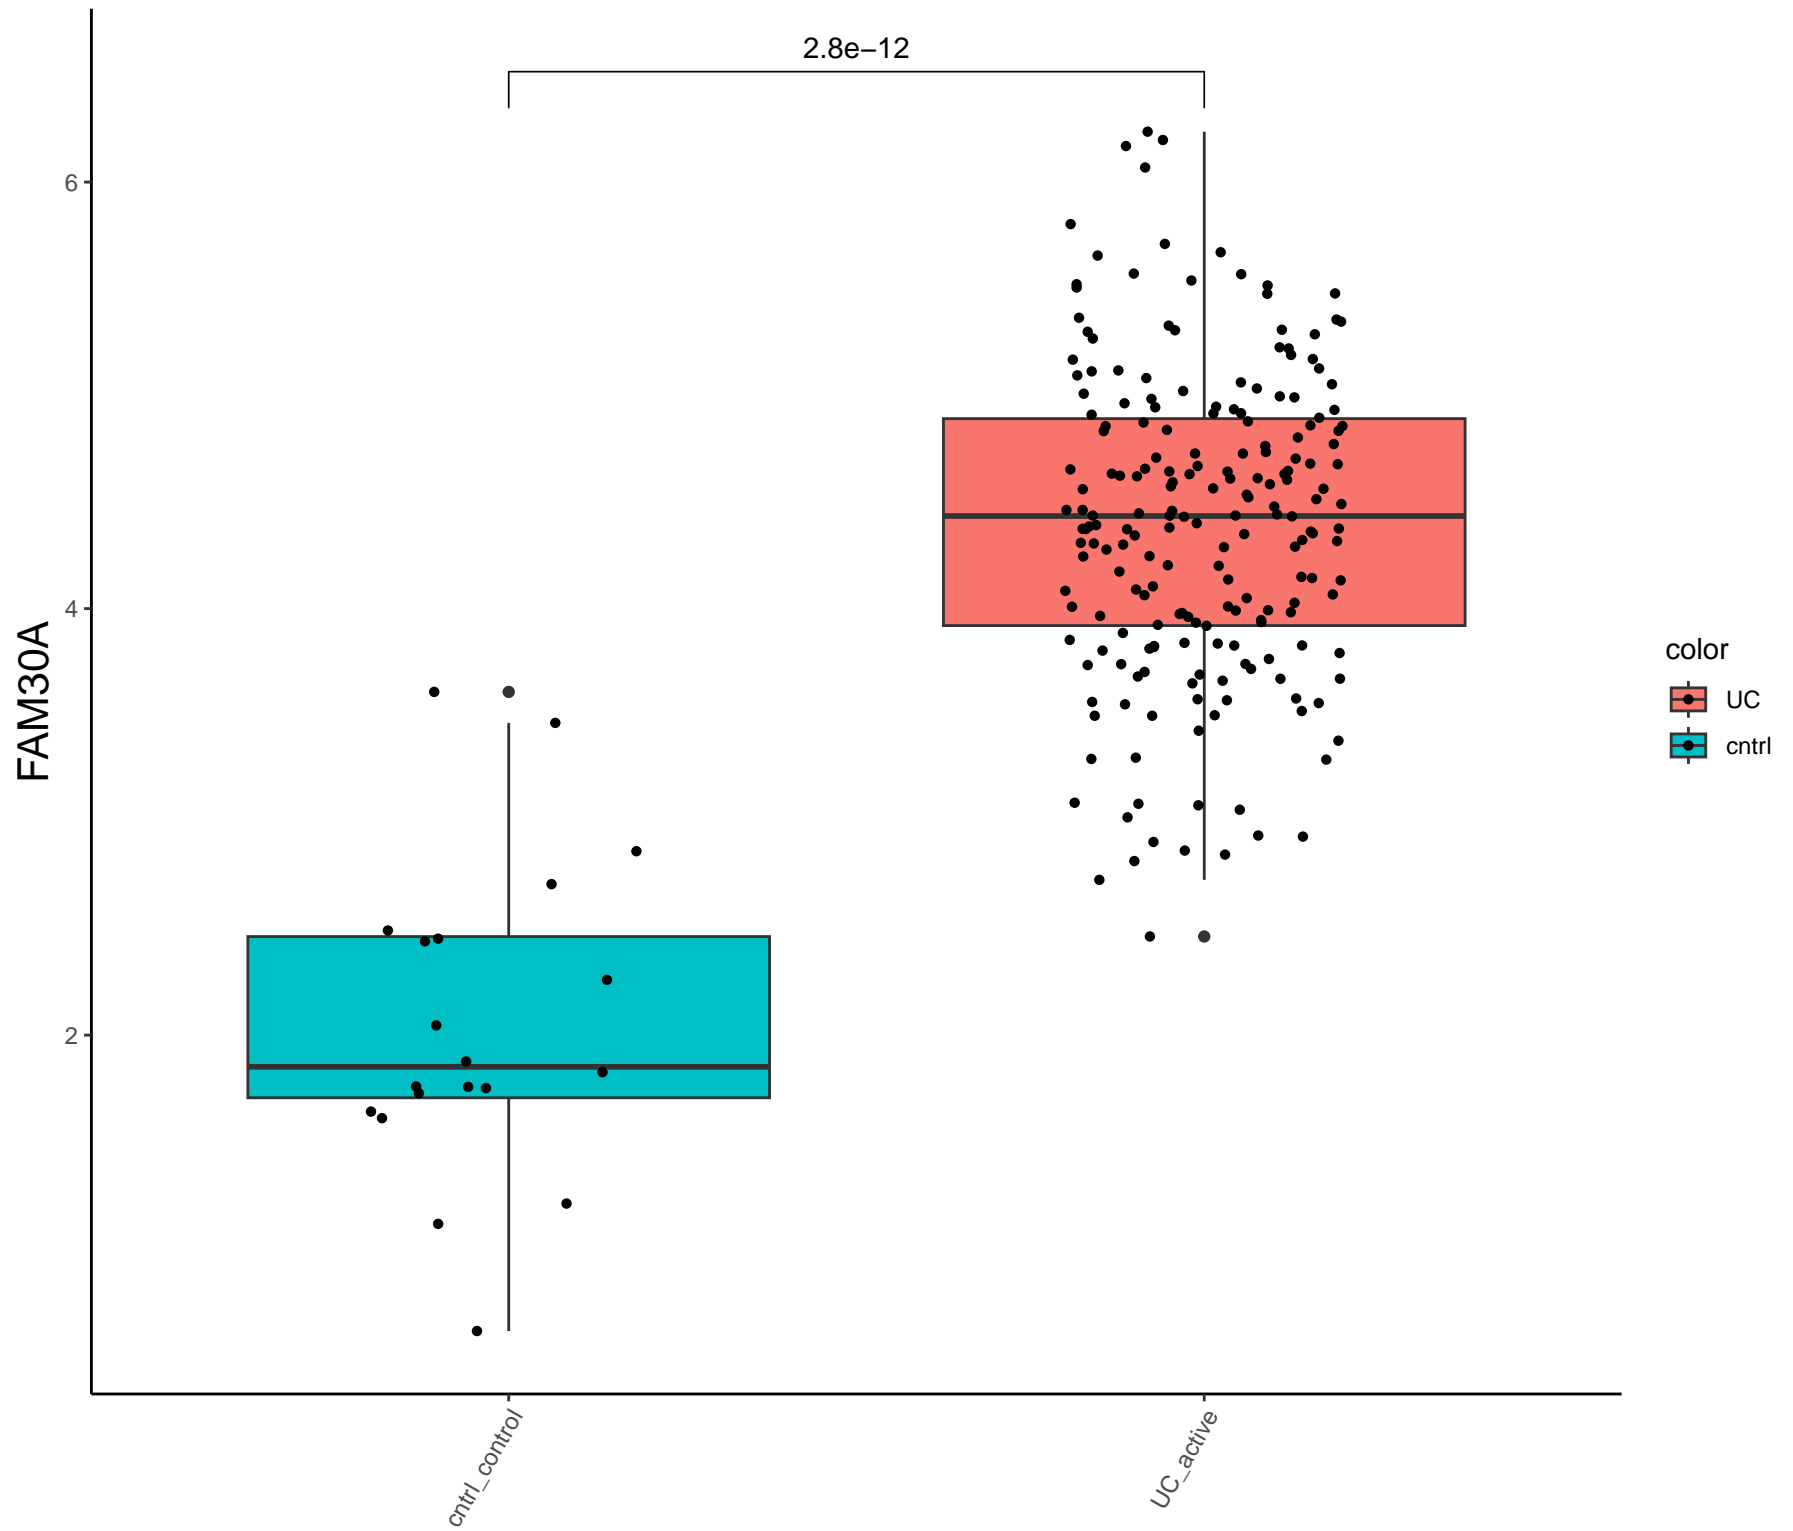

GSE128682

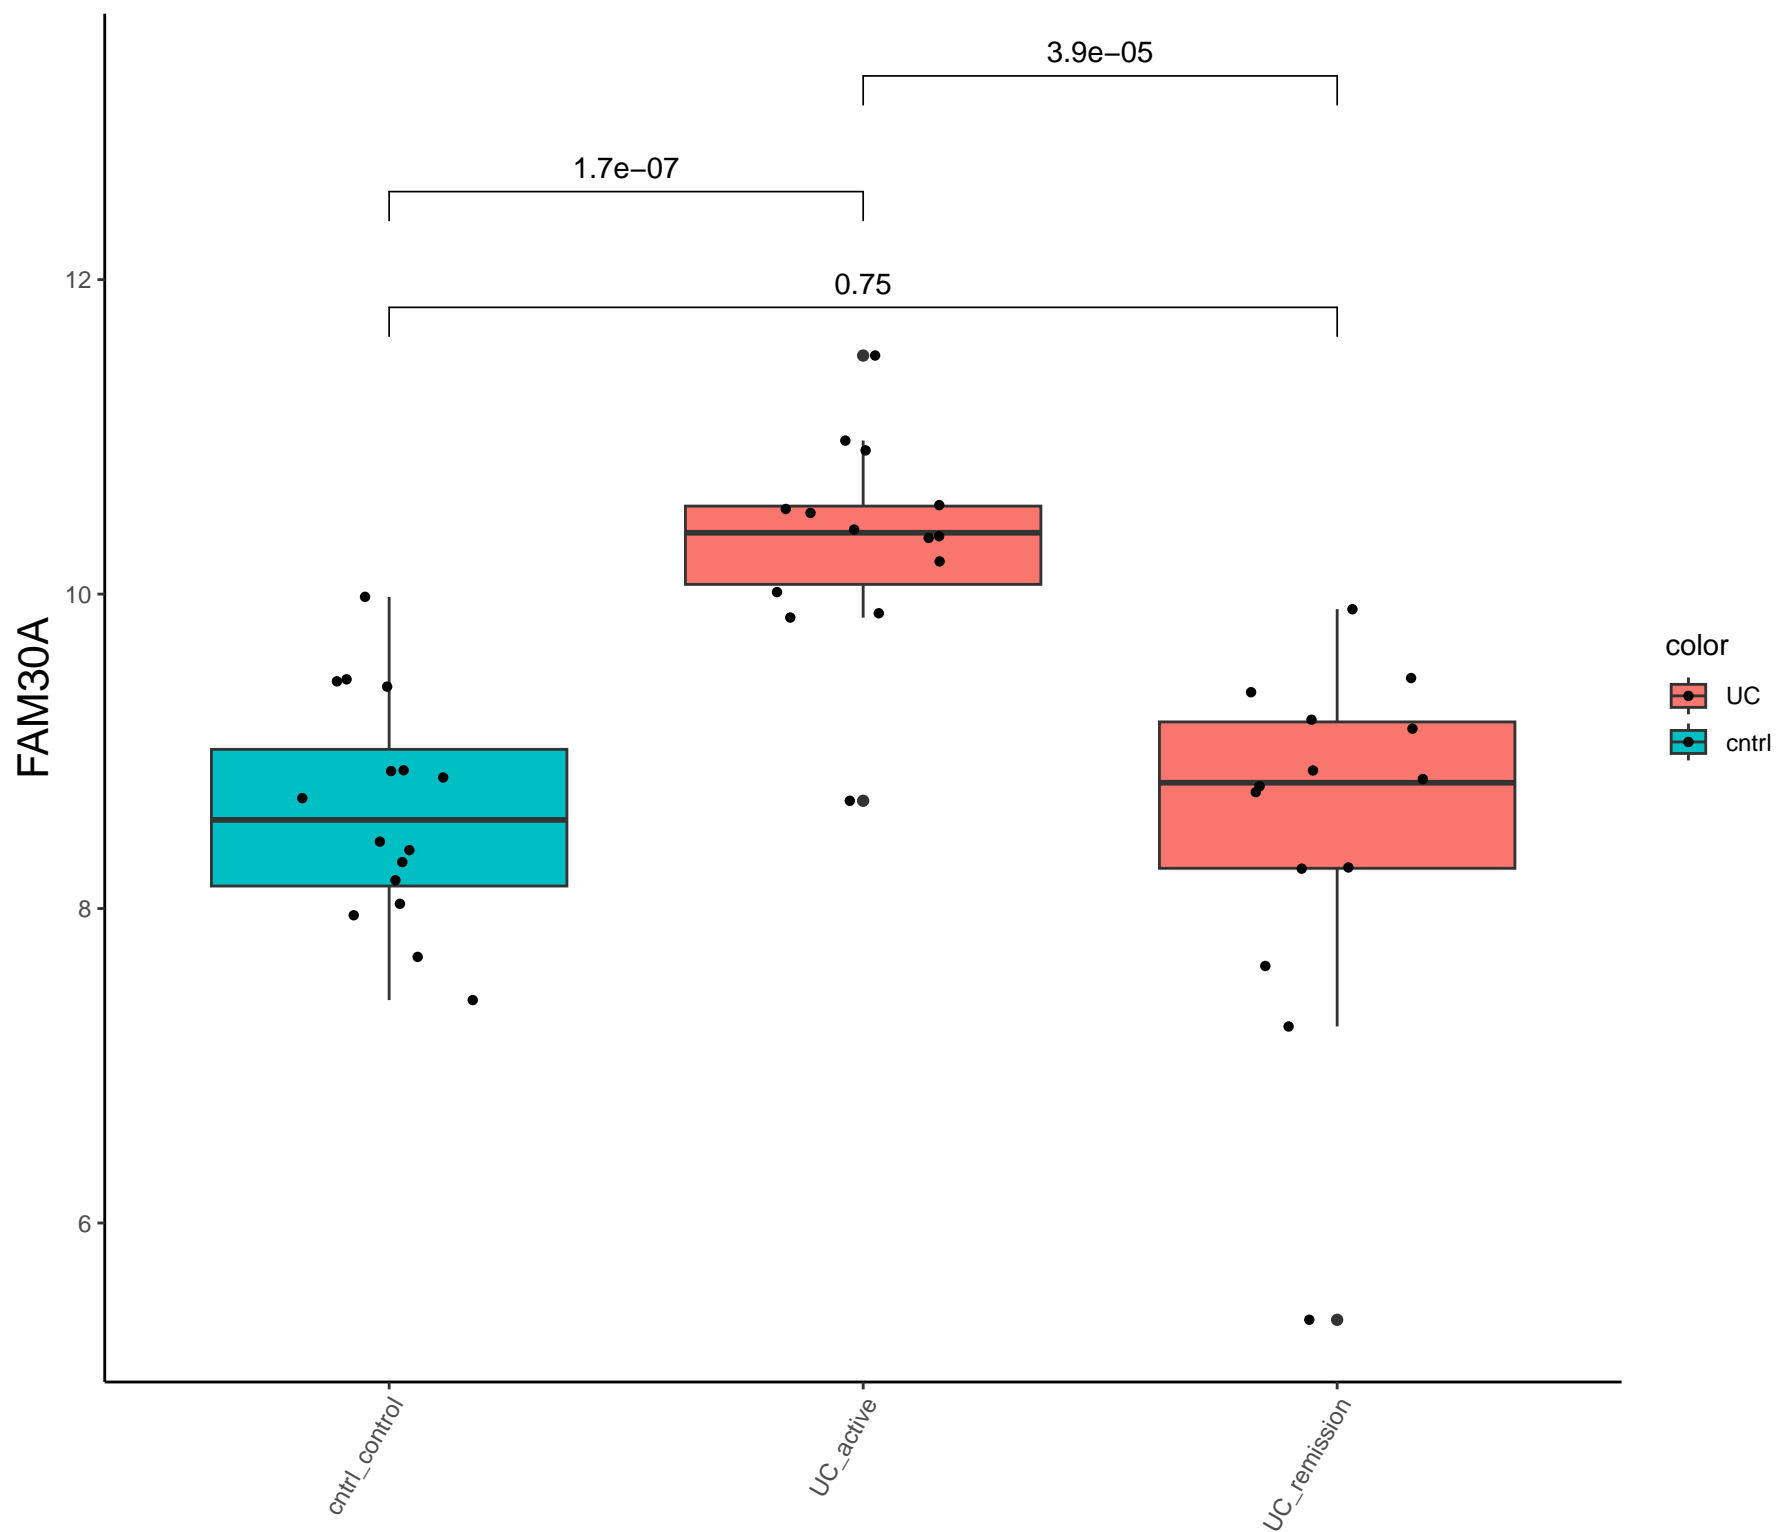

GSE16879

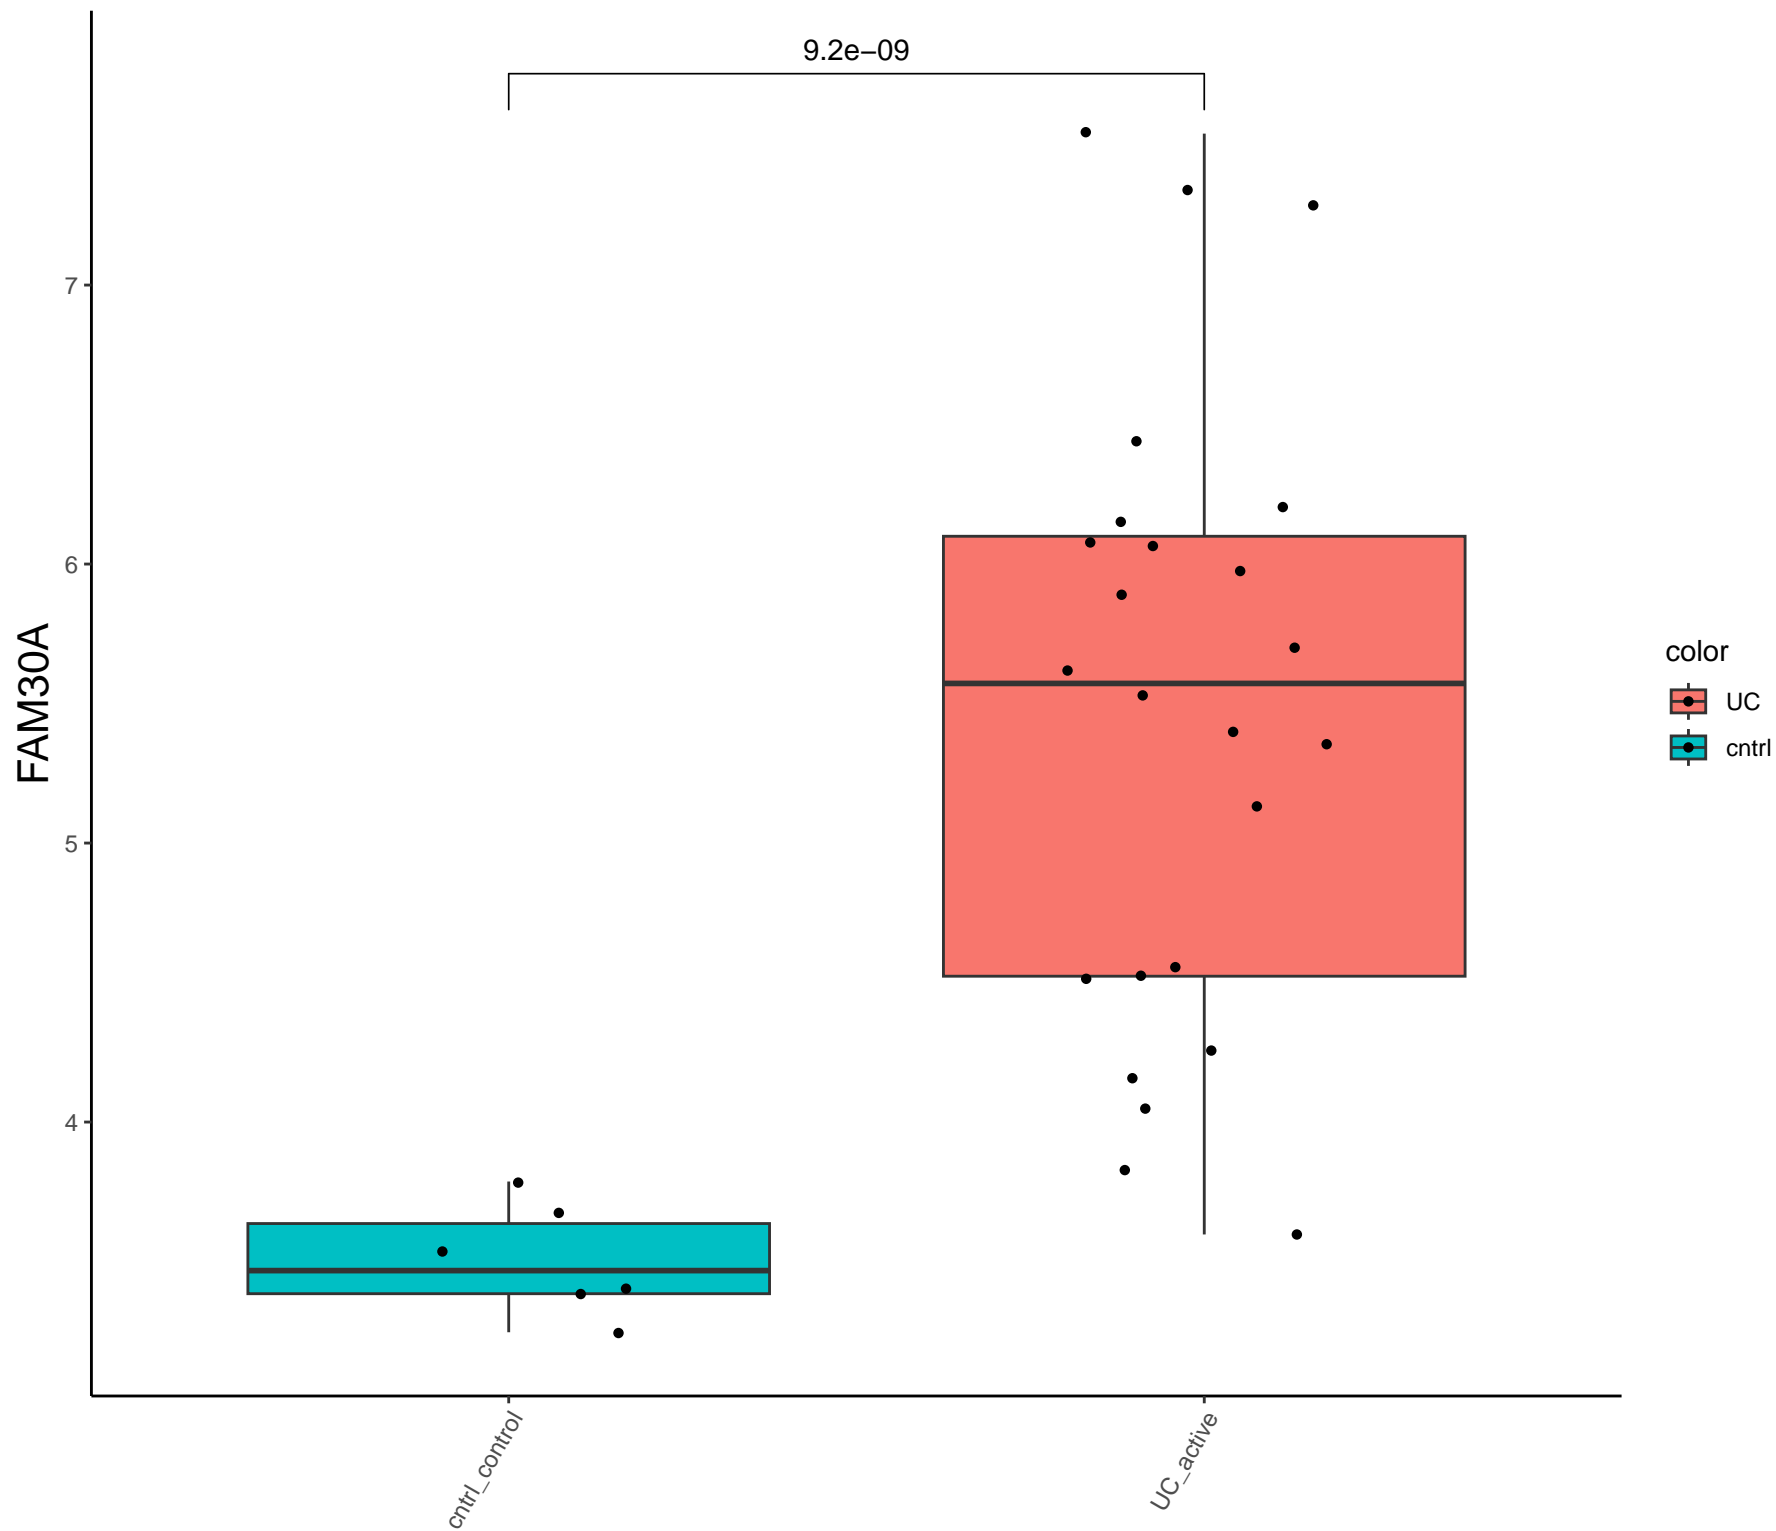

GSE206285

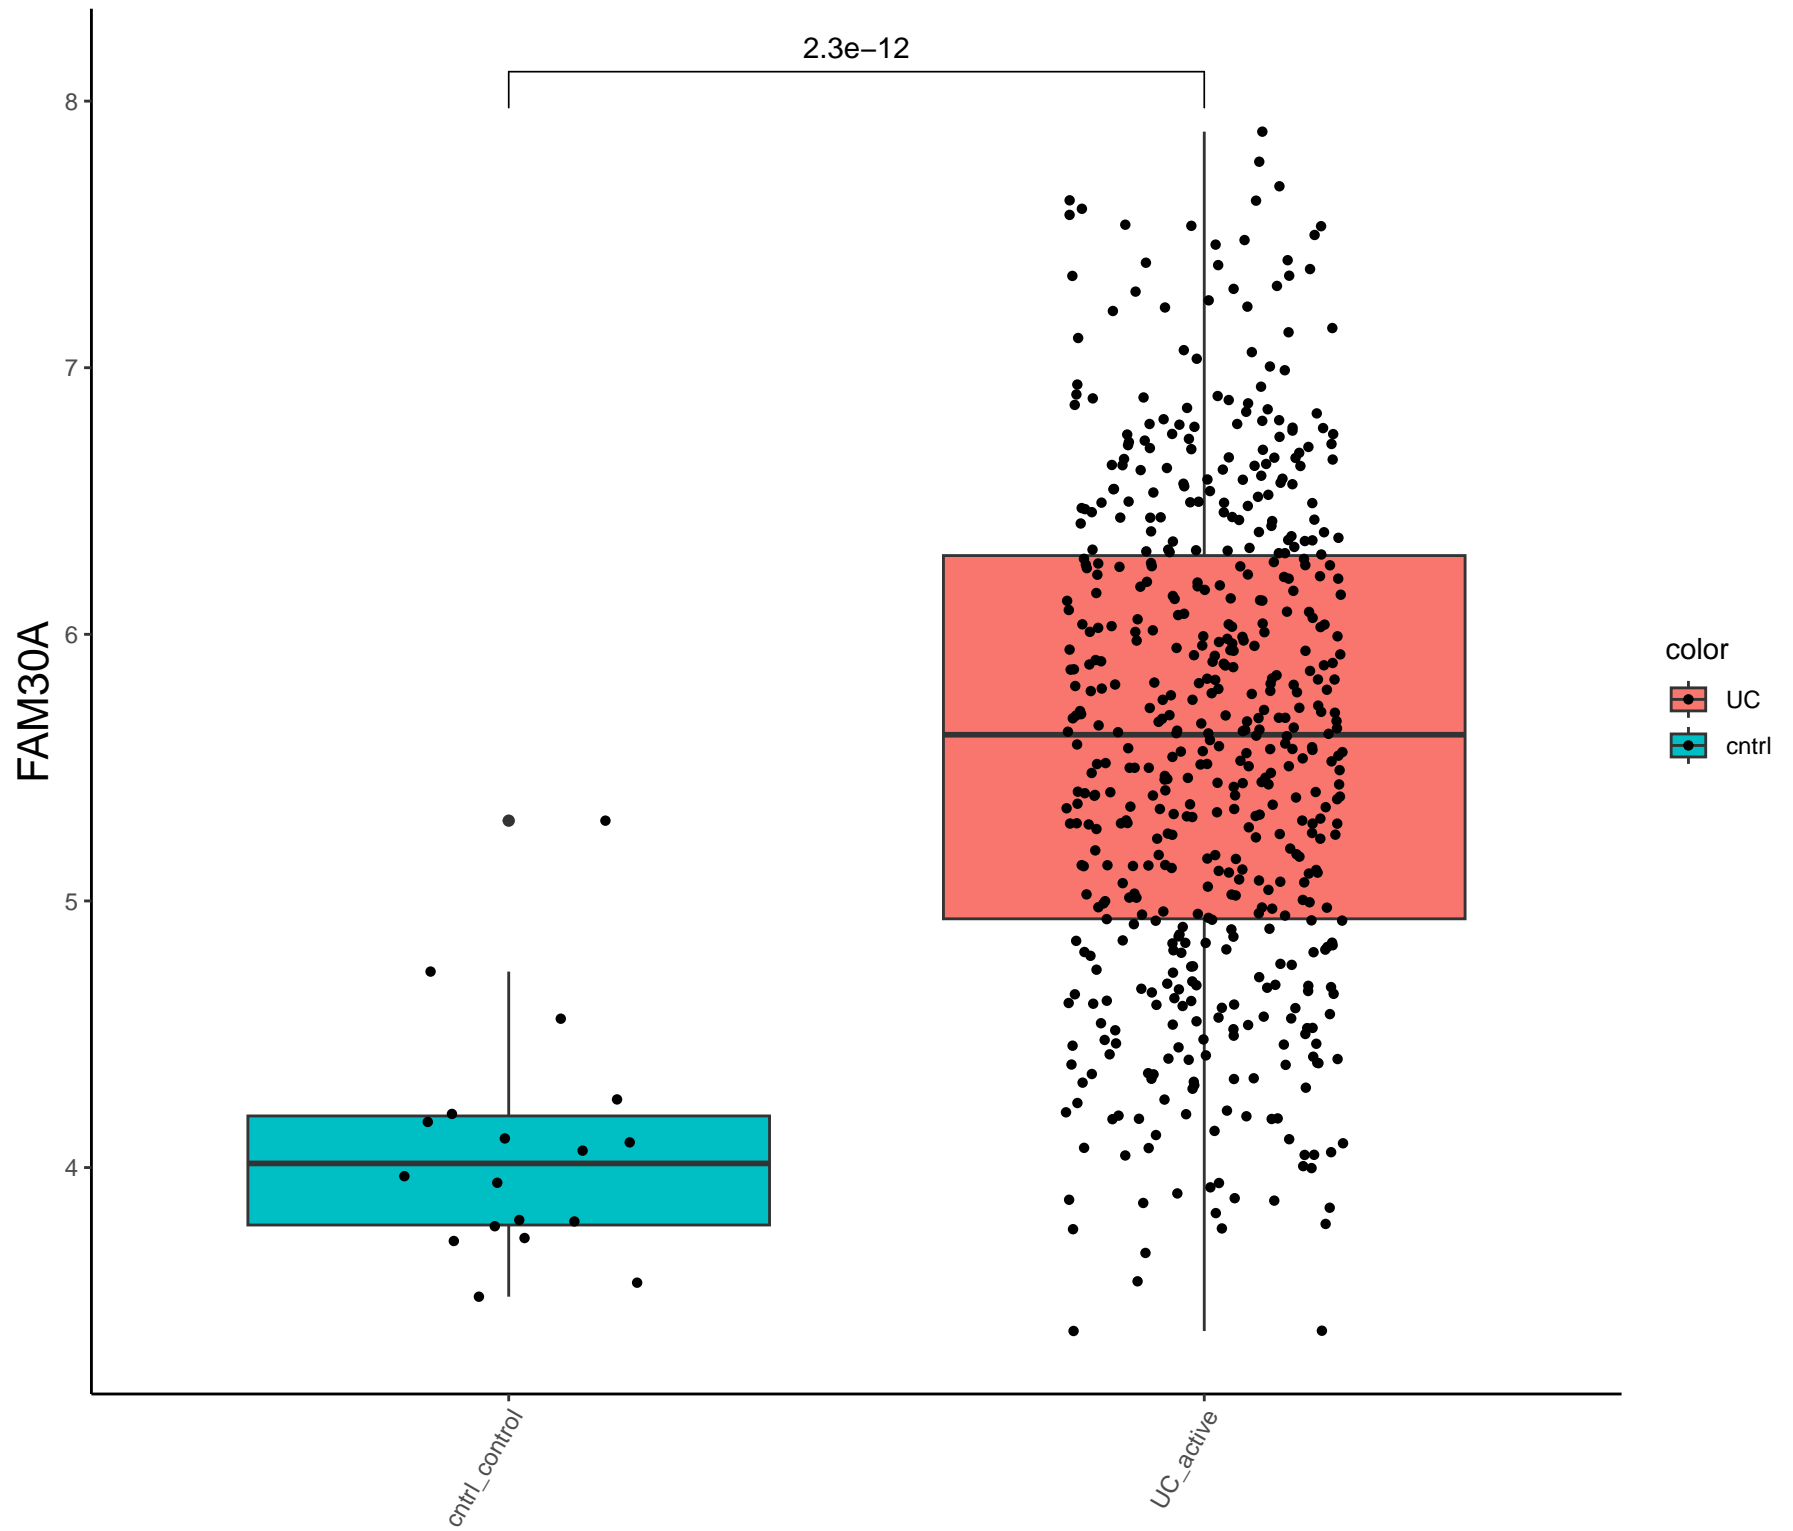



GSE47908

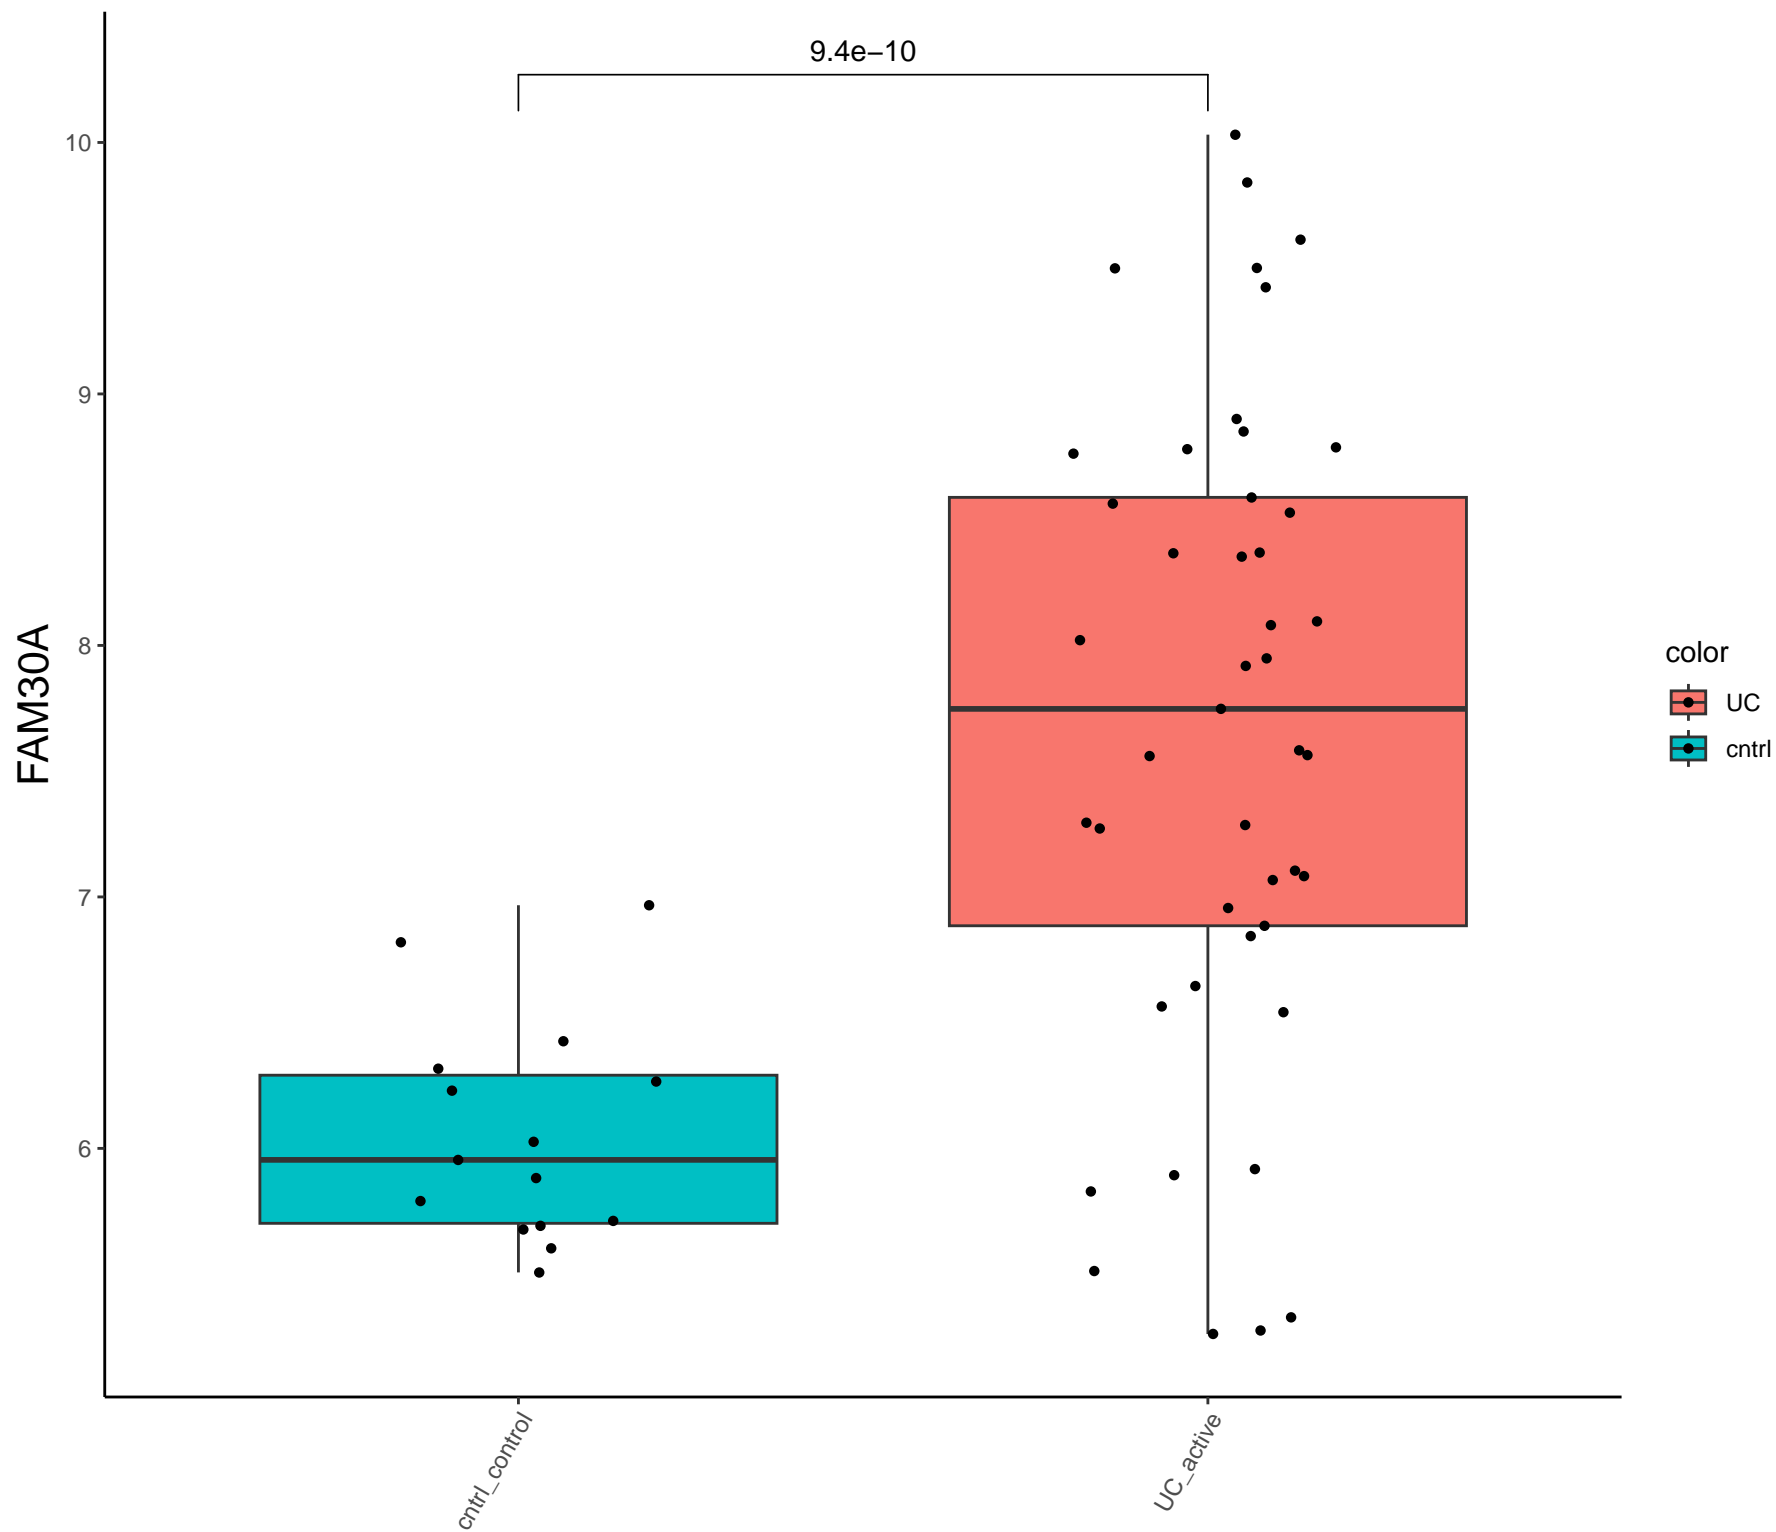

GSE59071

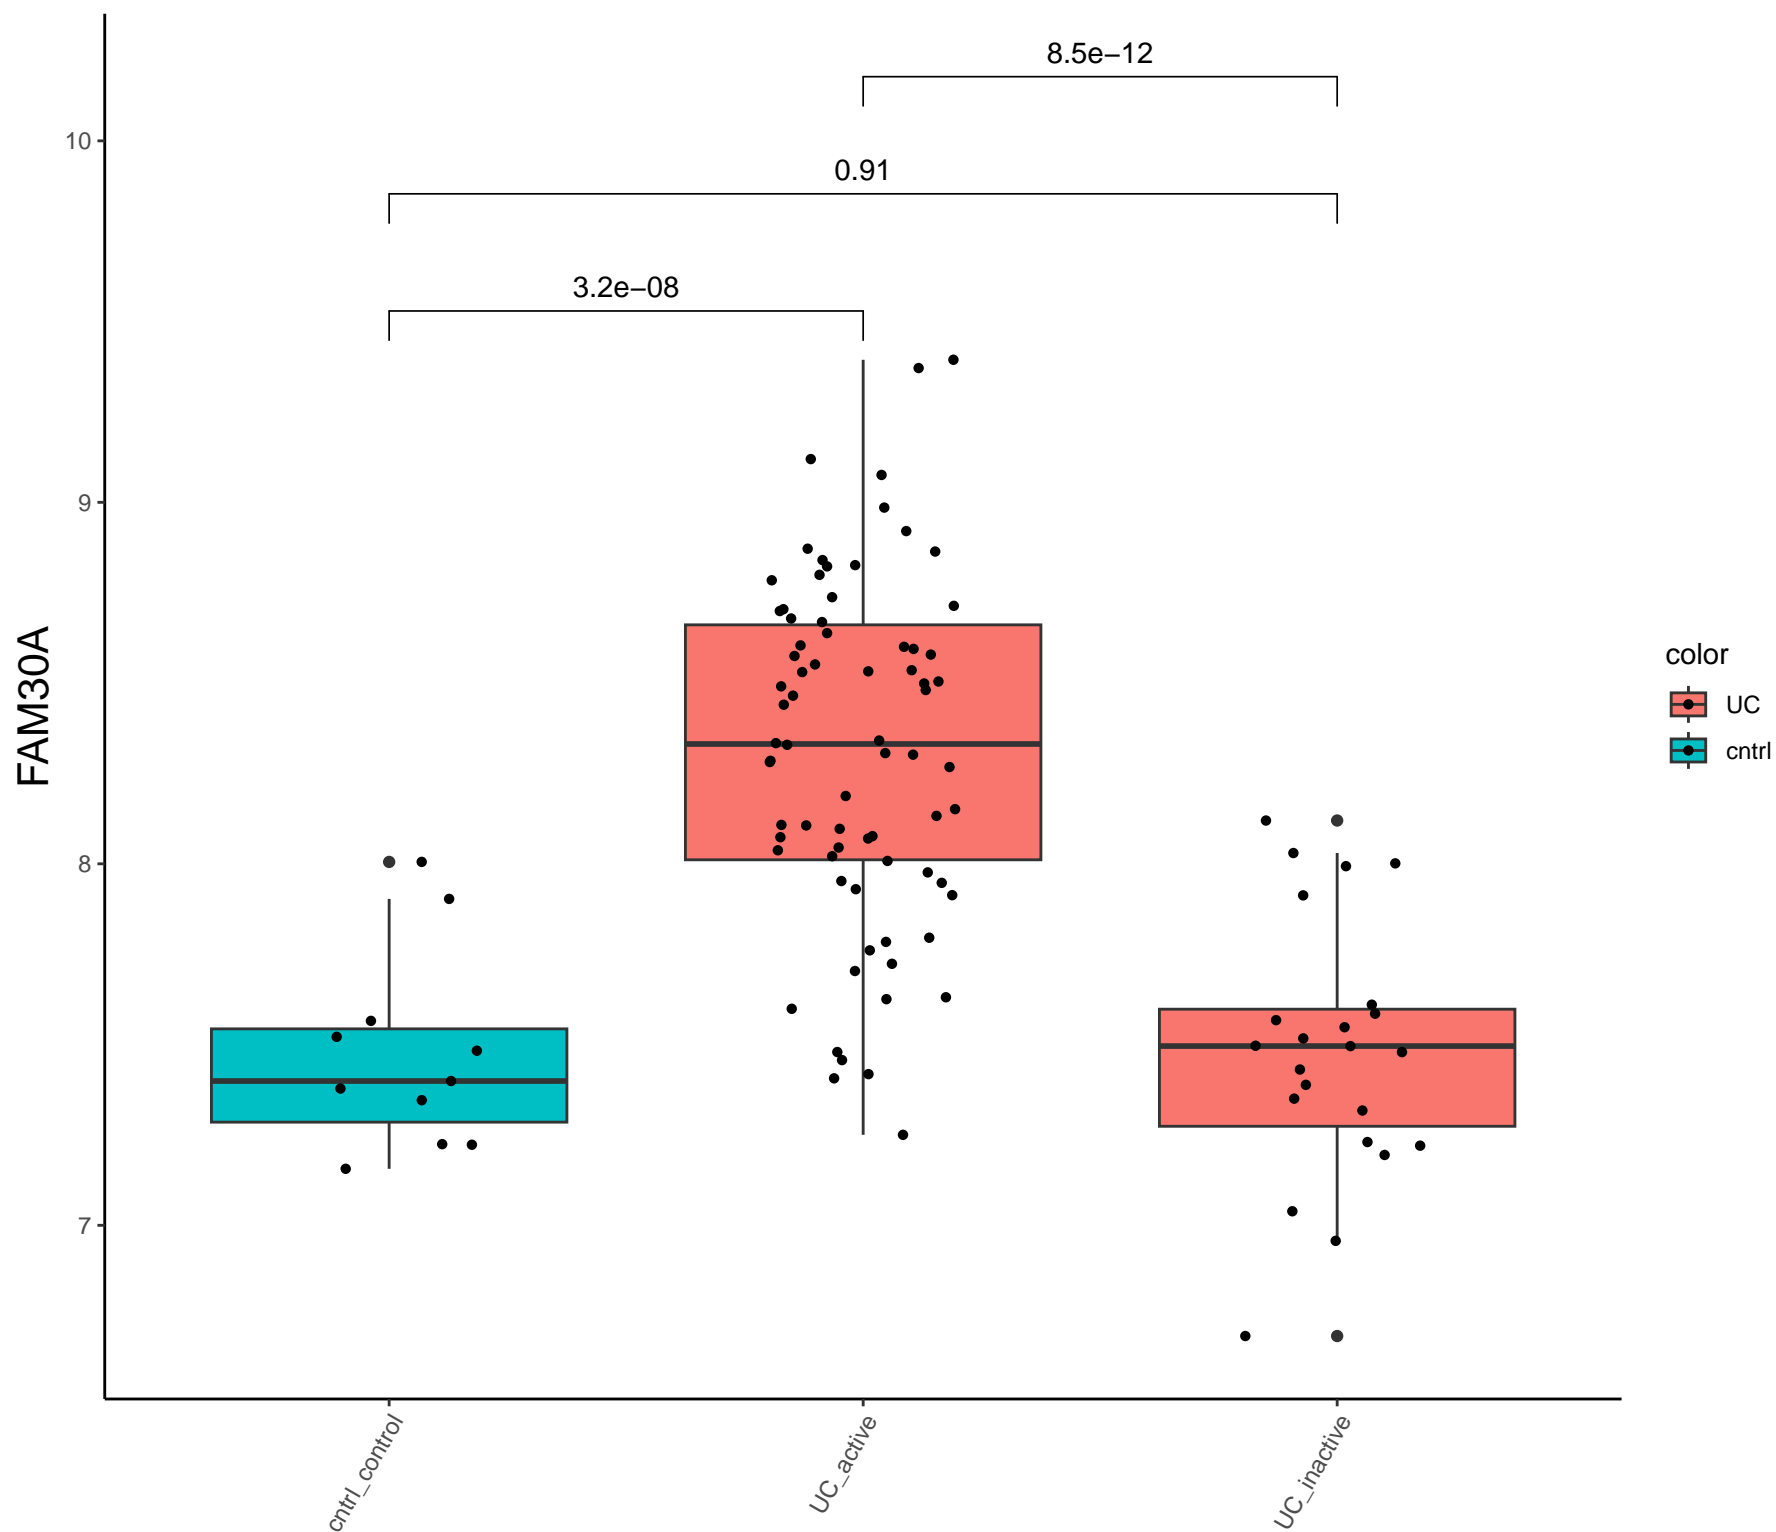

GSE87466

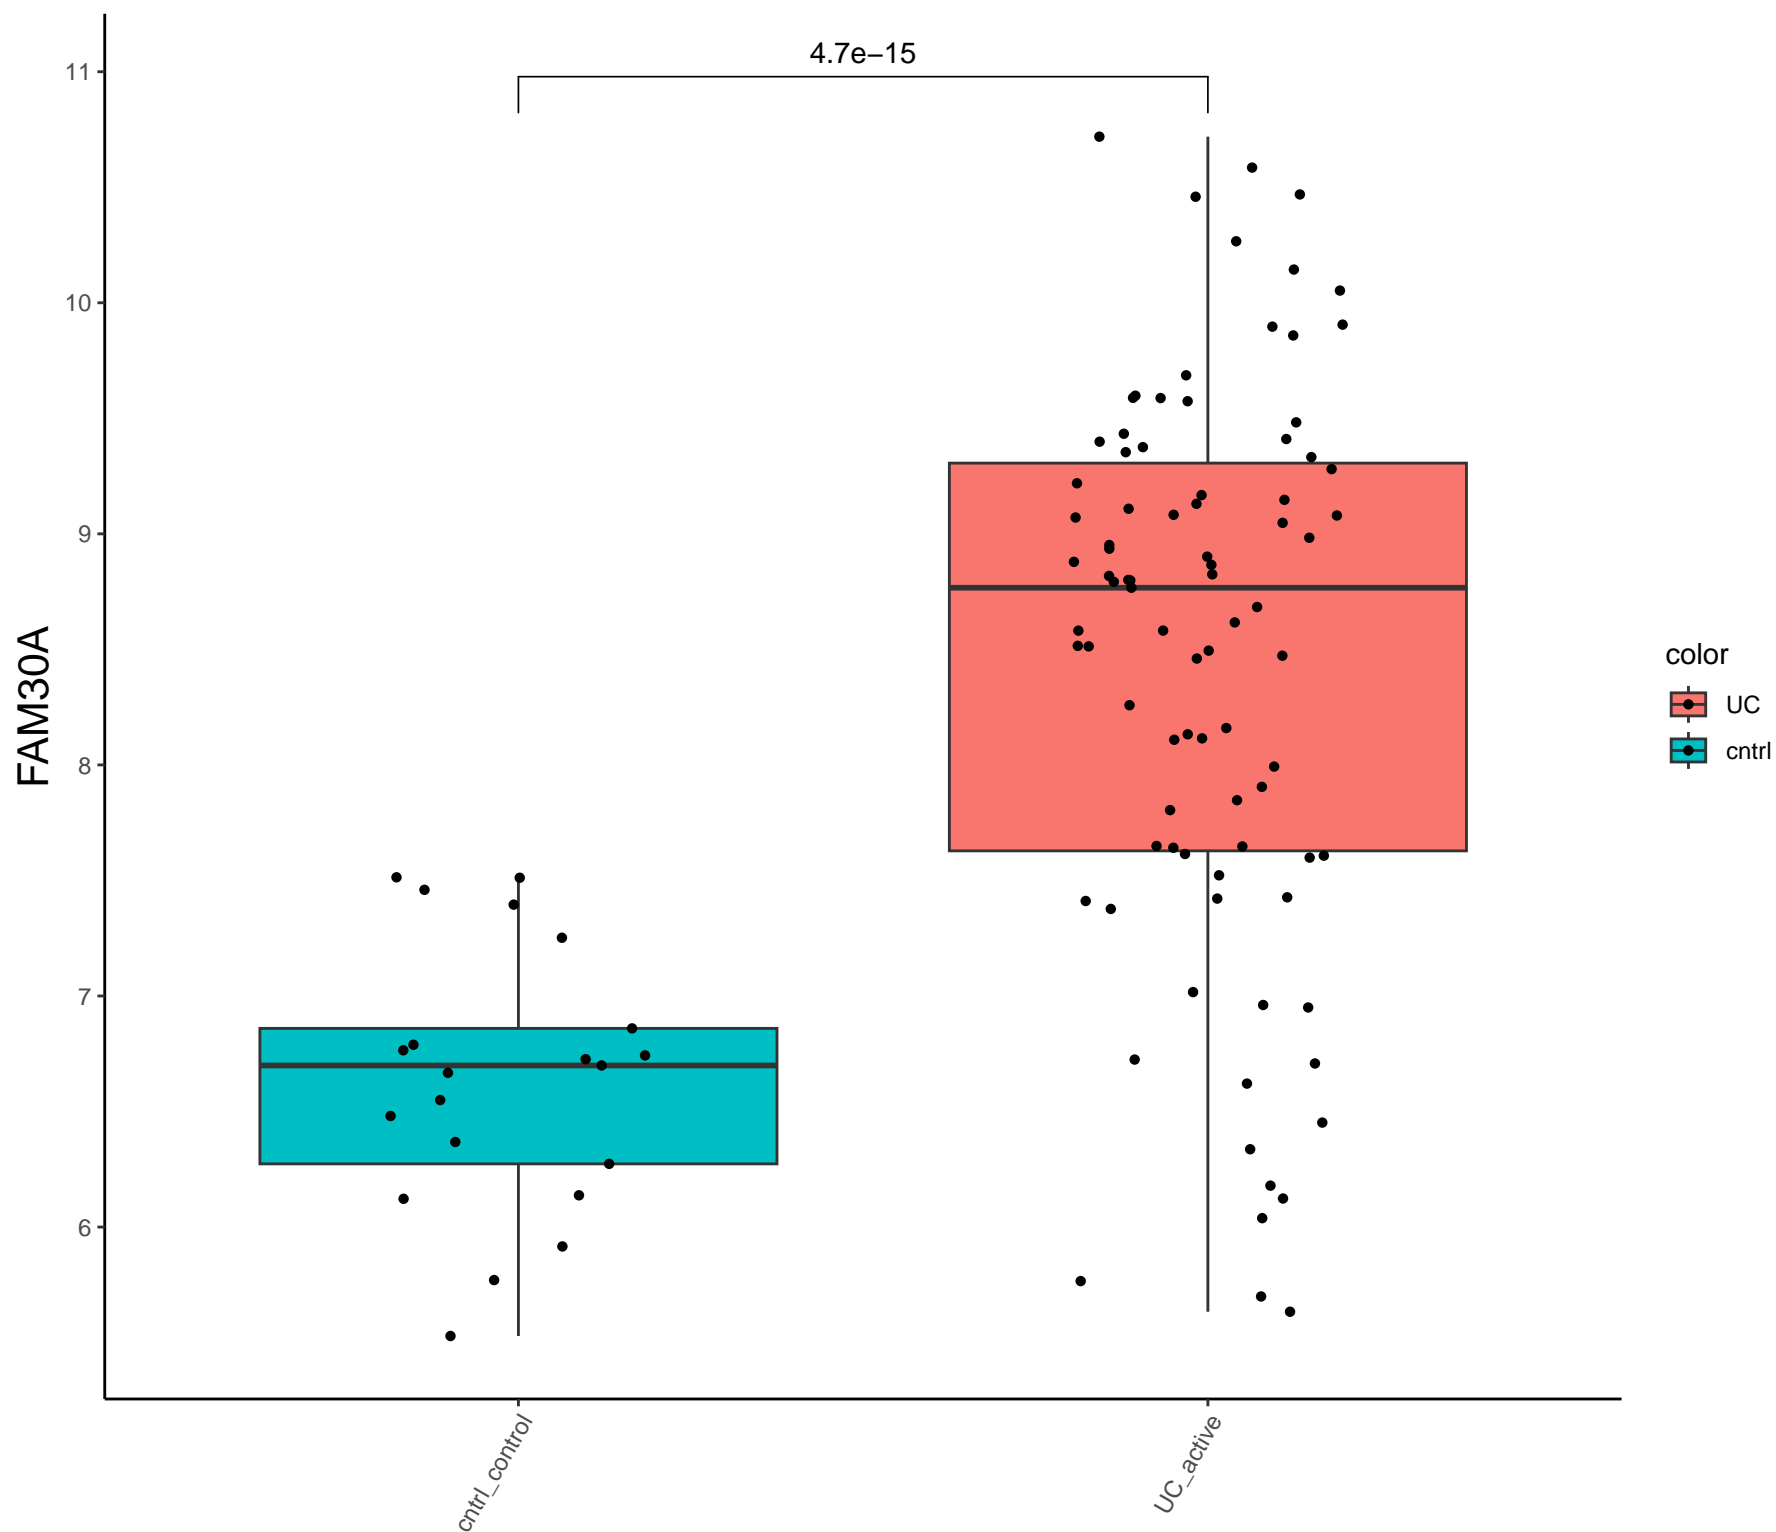

GSE92415

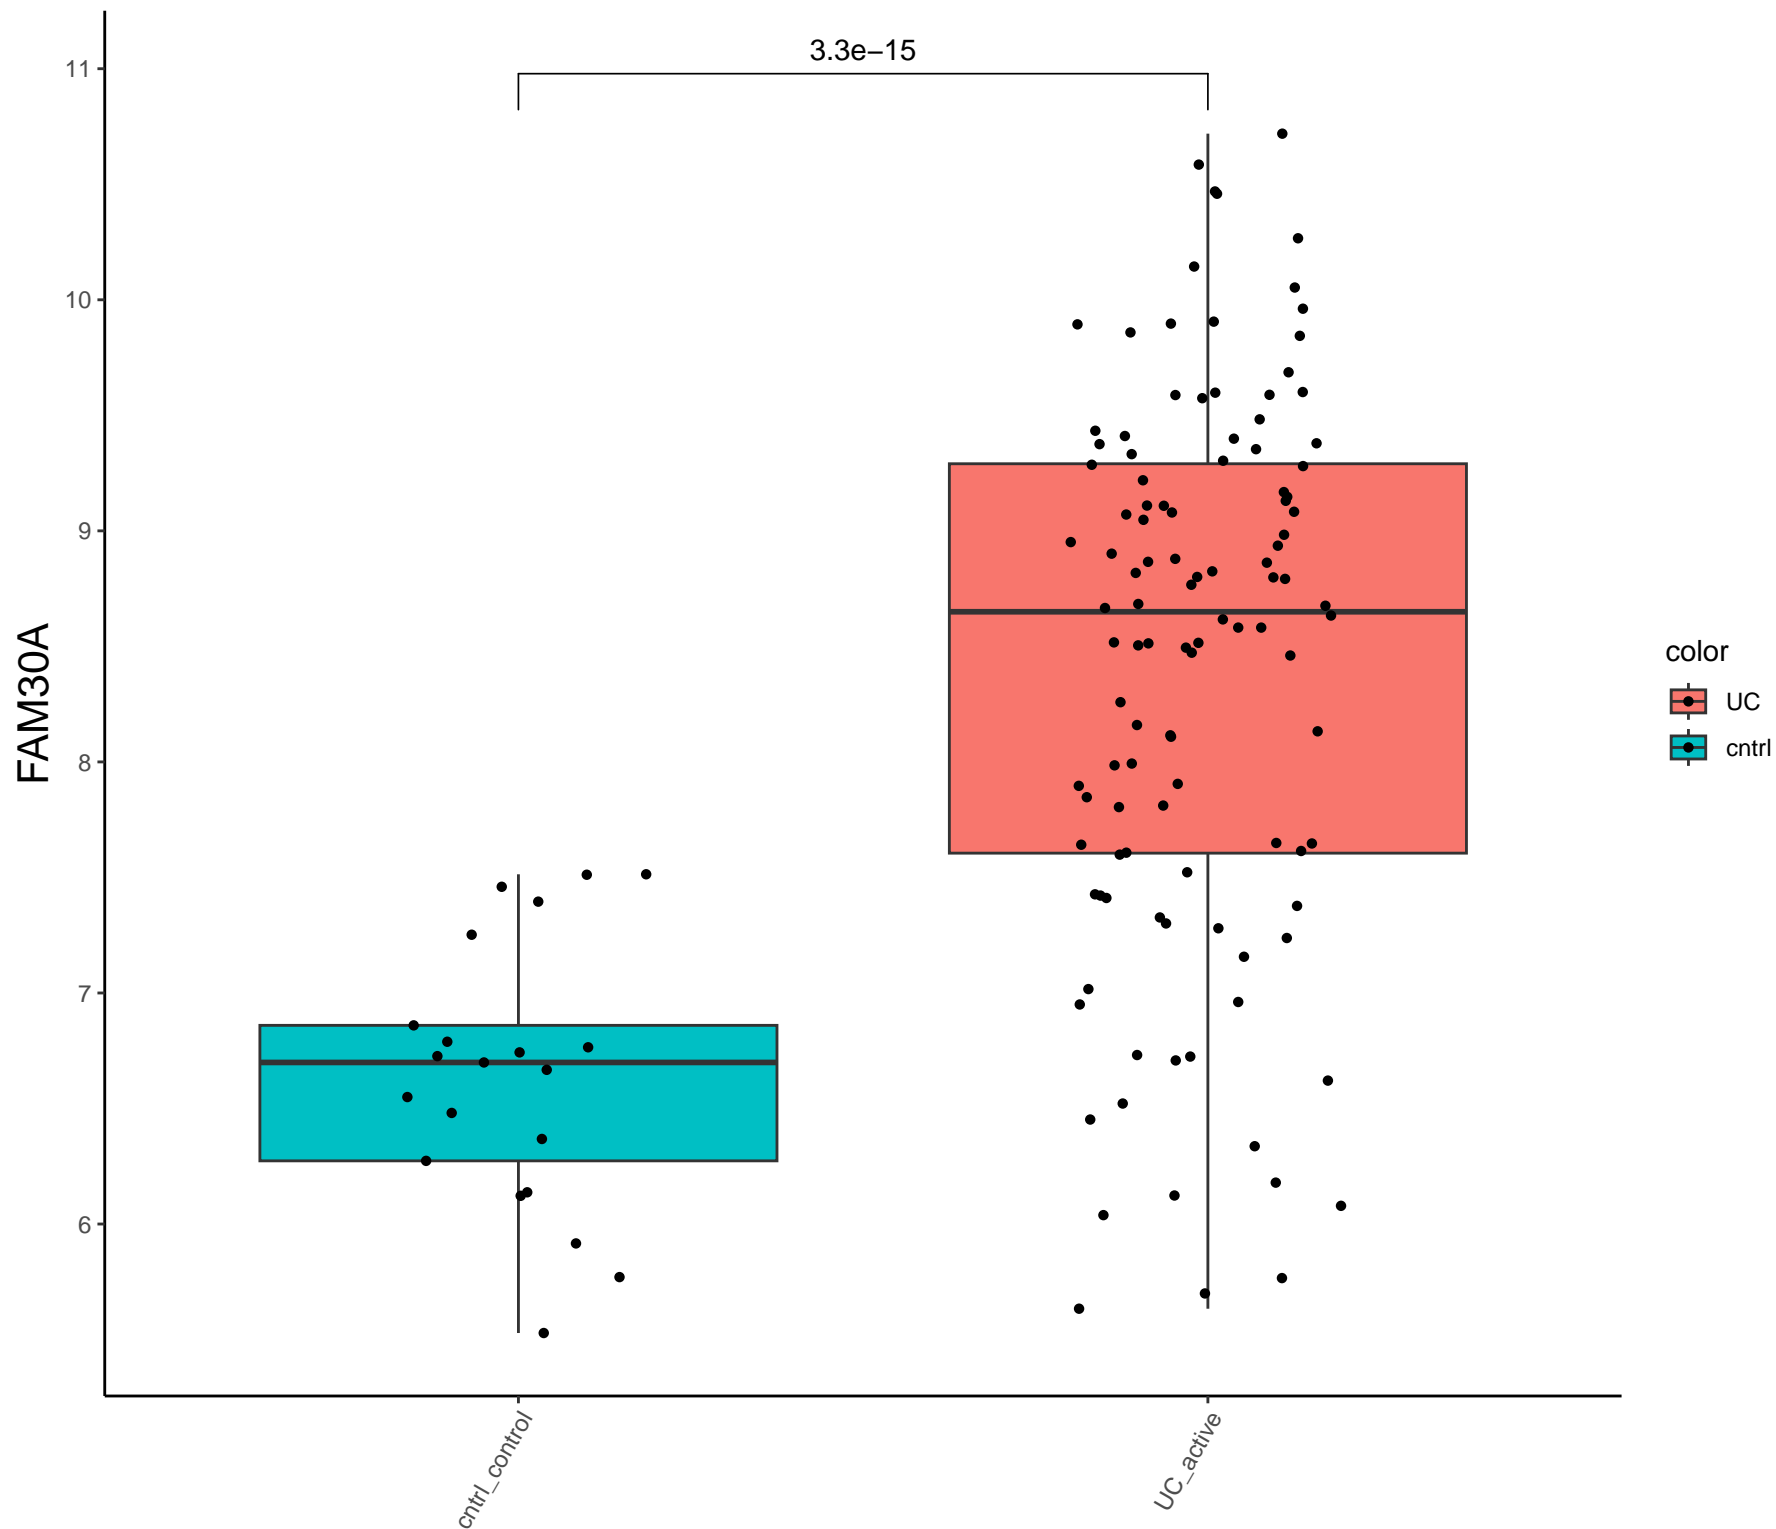

GSE128682

FLJ32255

9  
8  
7  
6  
5

cntrl\_control

UC\_active

UC\_remission

$3.5e-08$

0.44

$2.3e-05$

color

UC  
cntrl

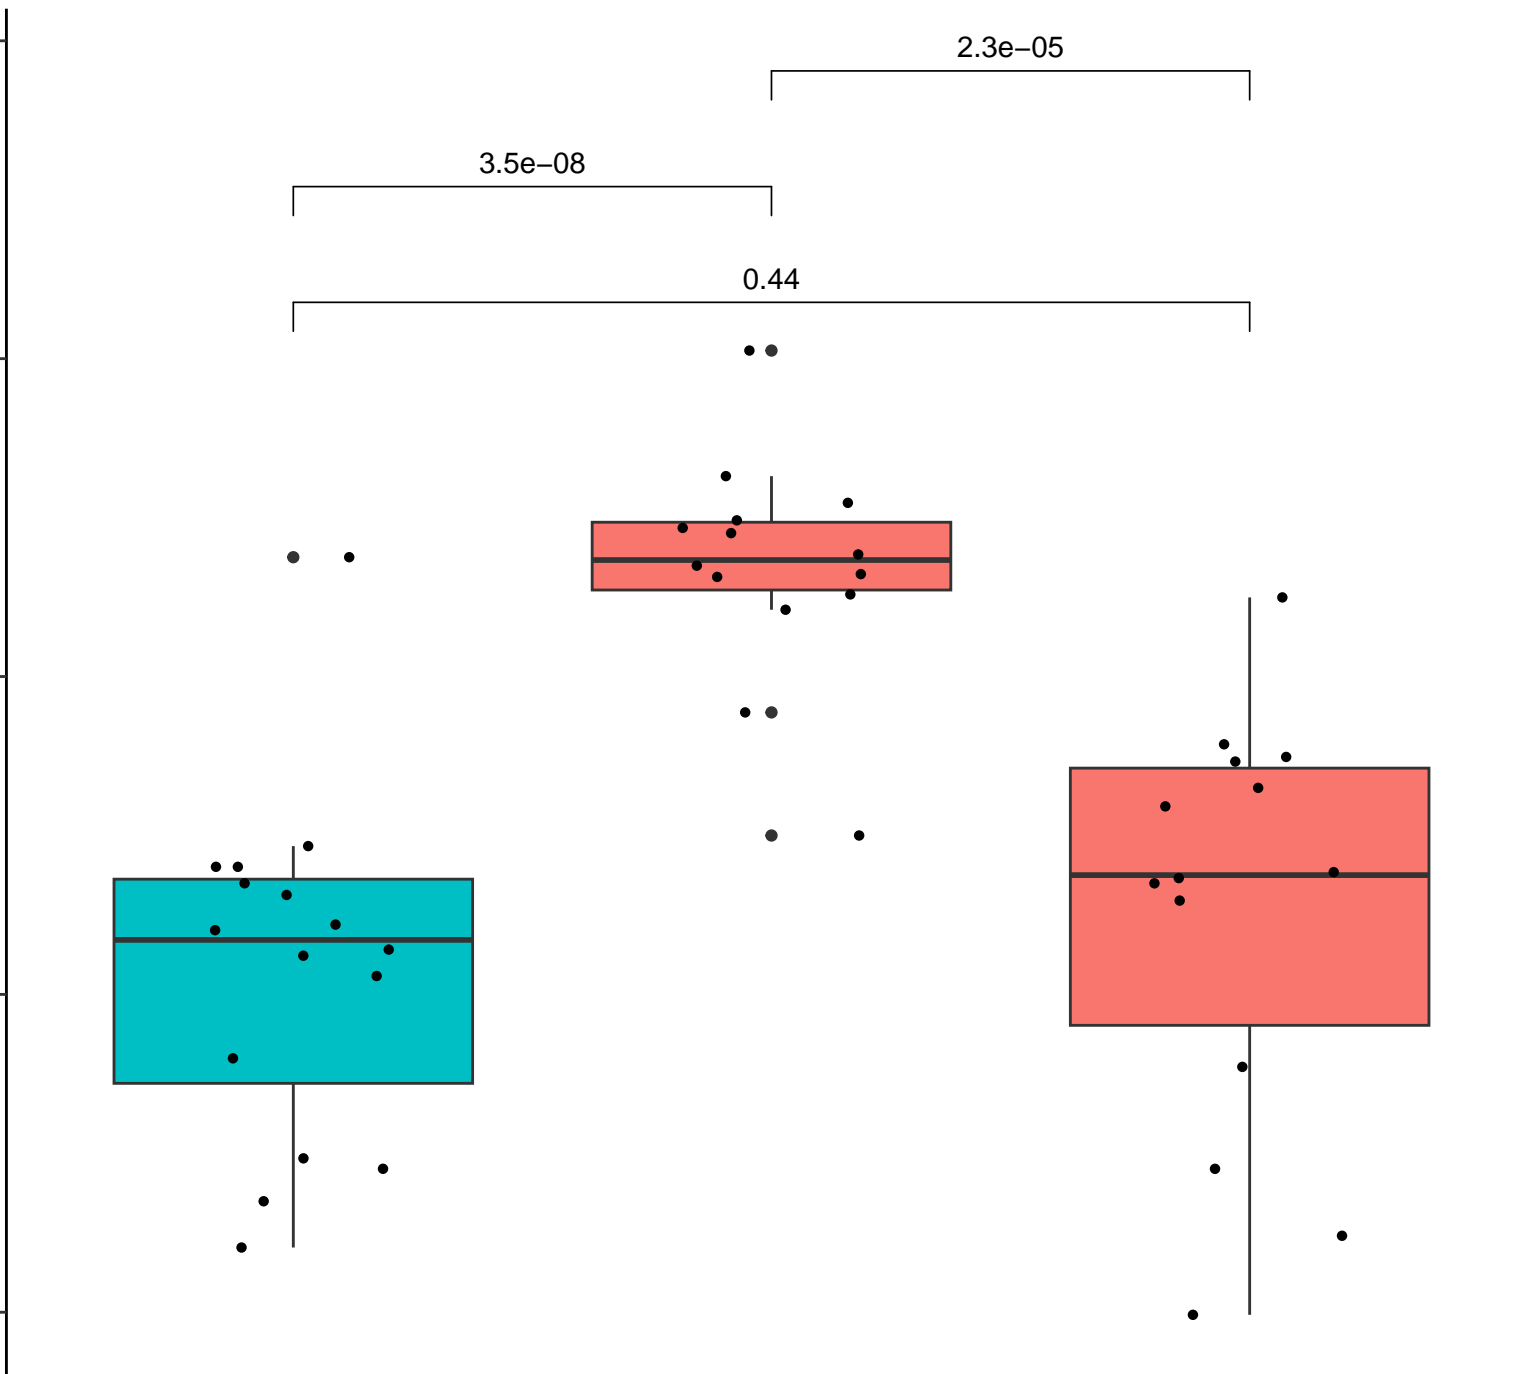

GSE16879

FLJ32255

1e-06

color

UC  
cntrl

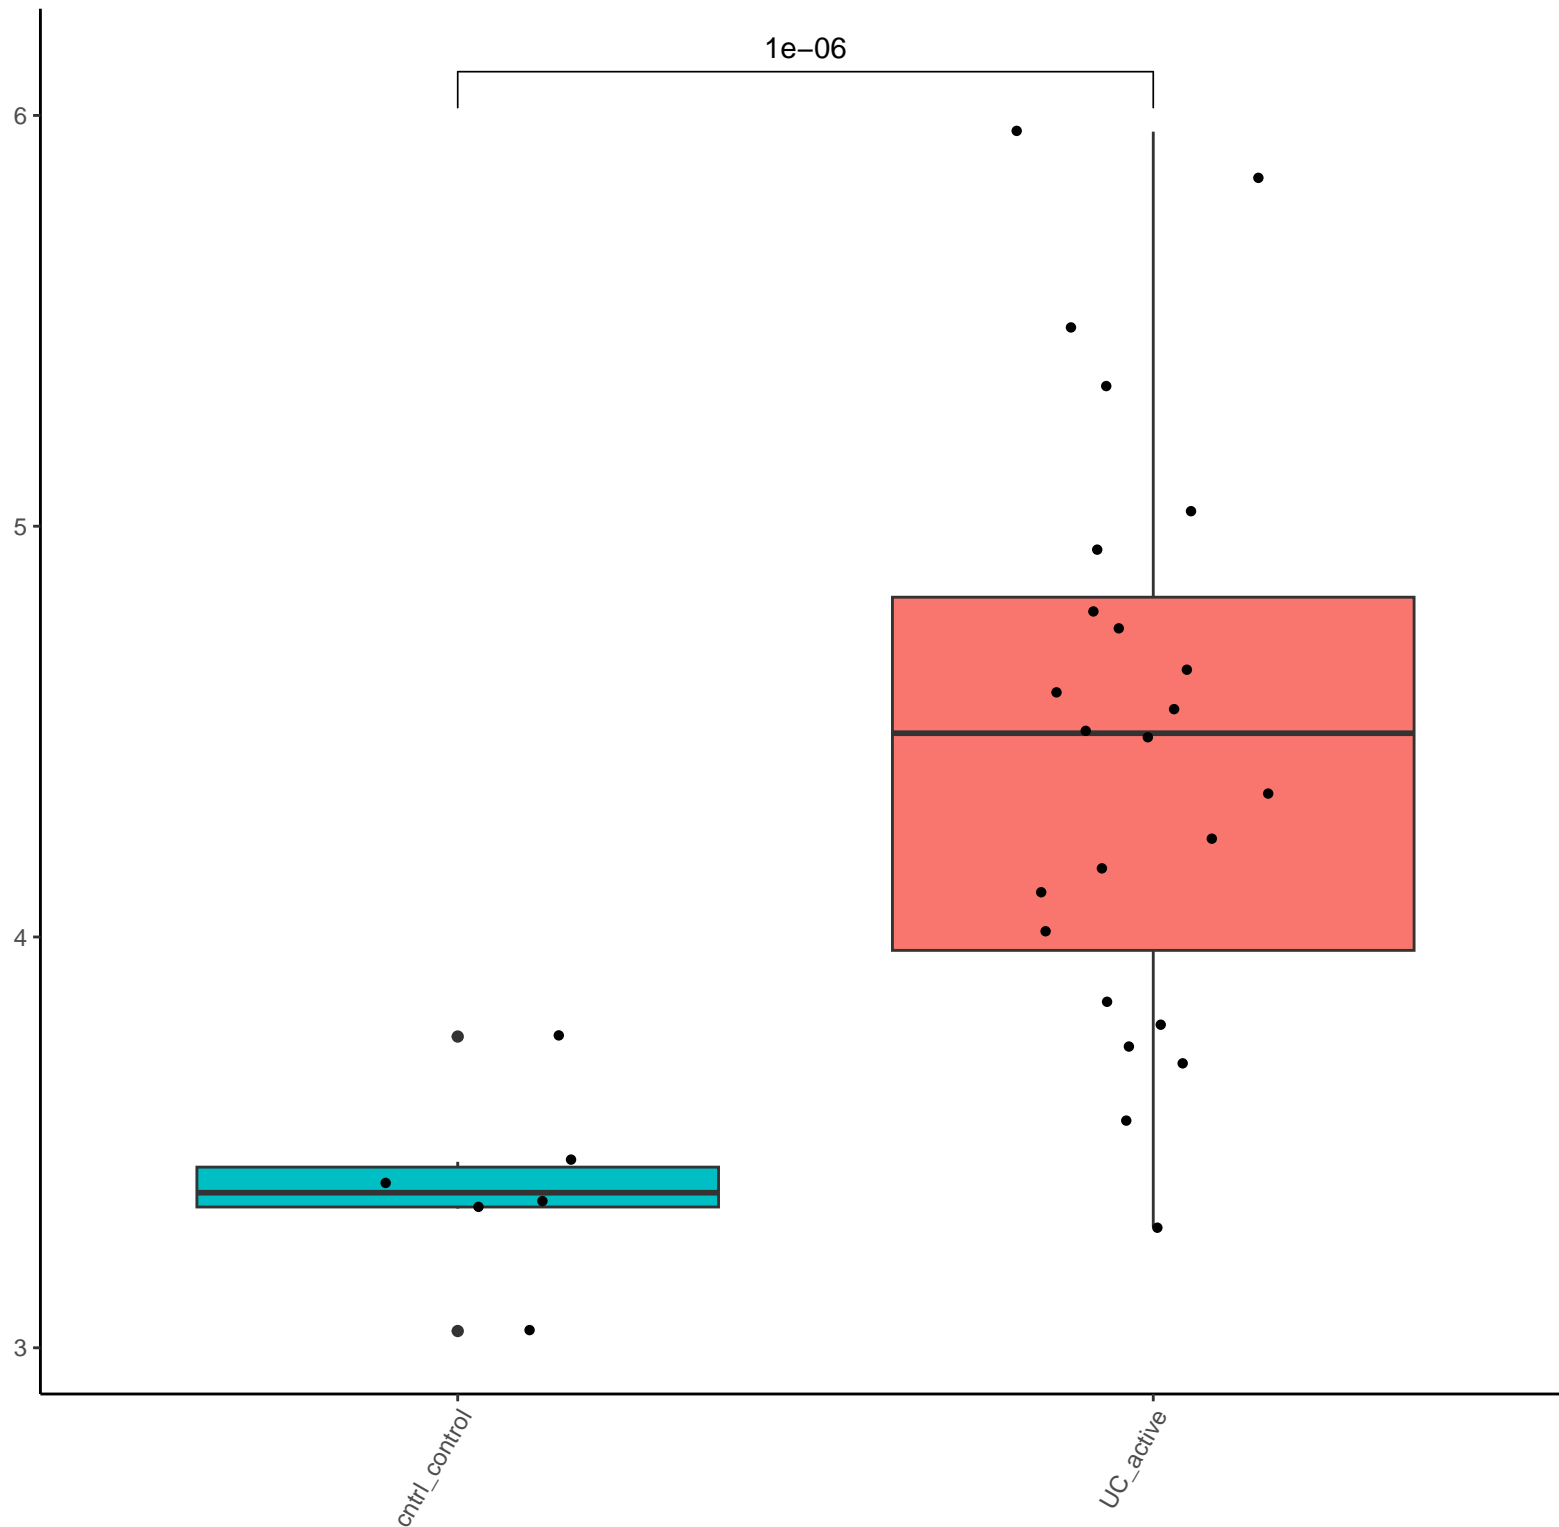

GSE206285

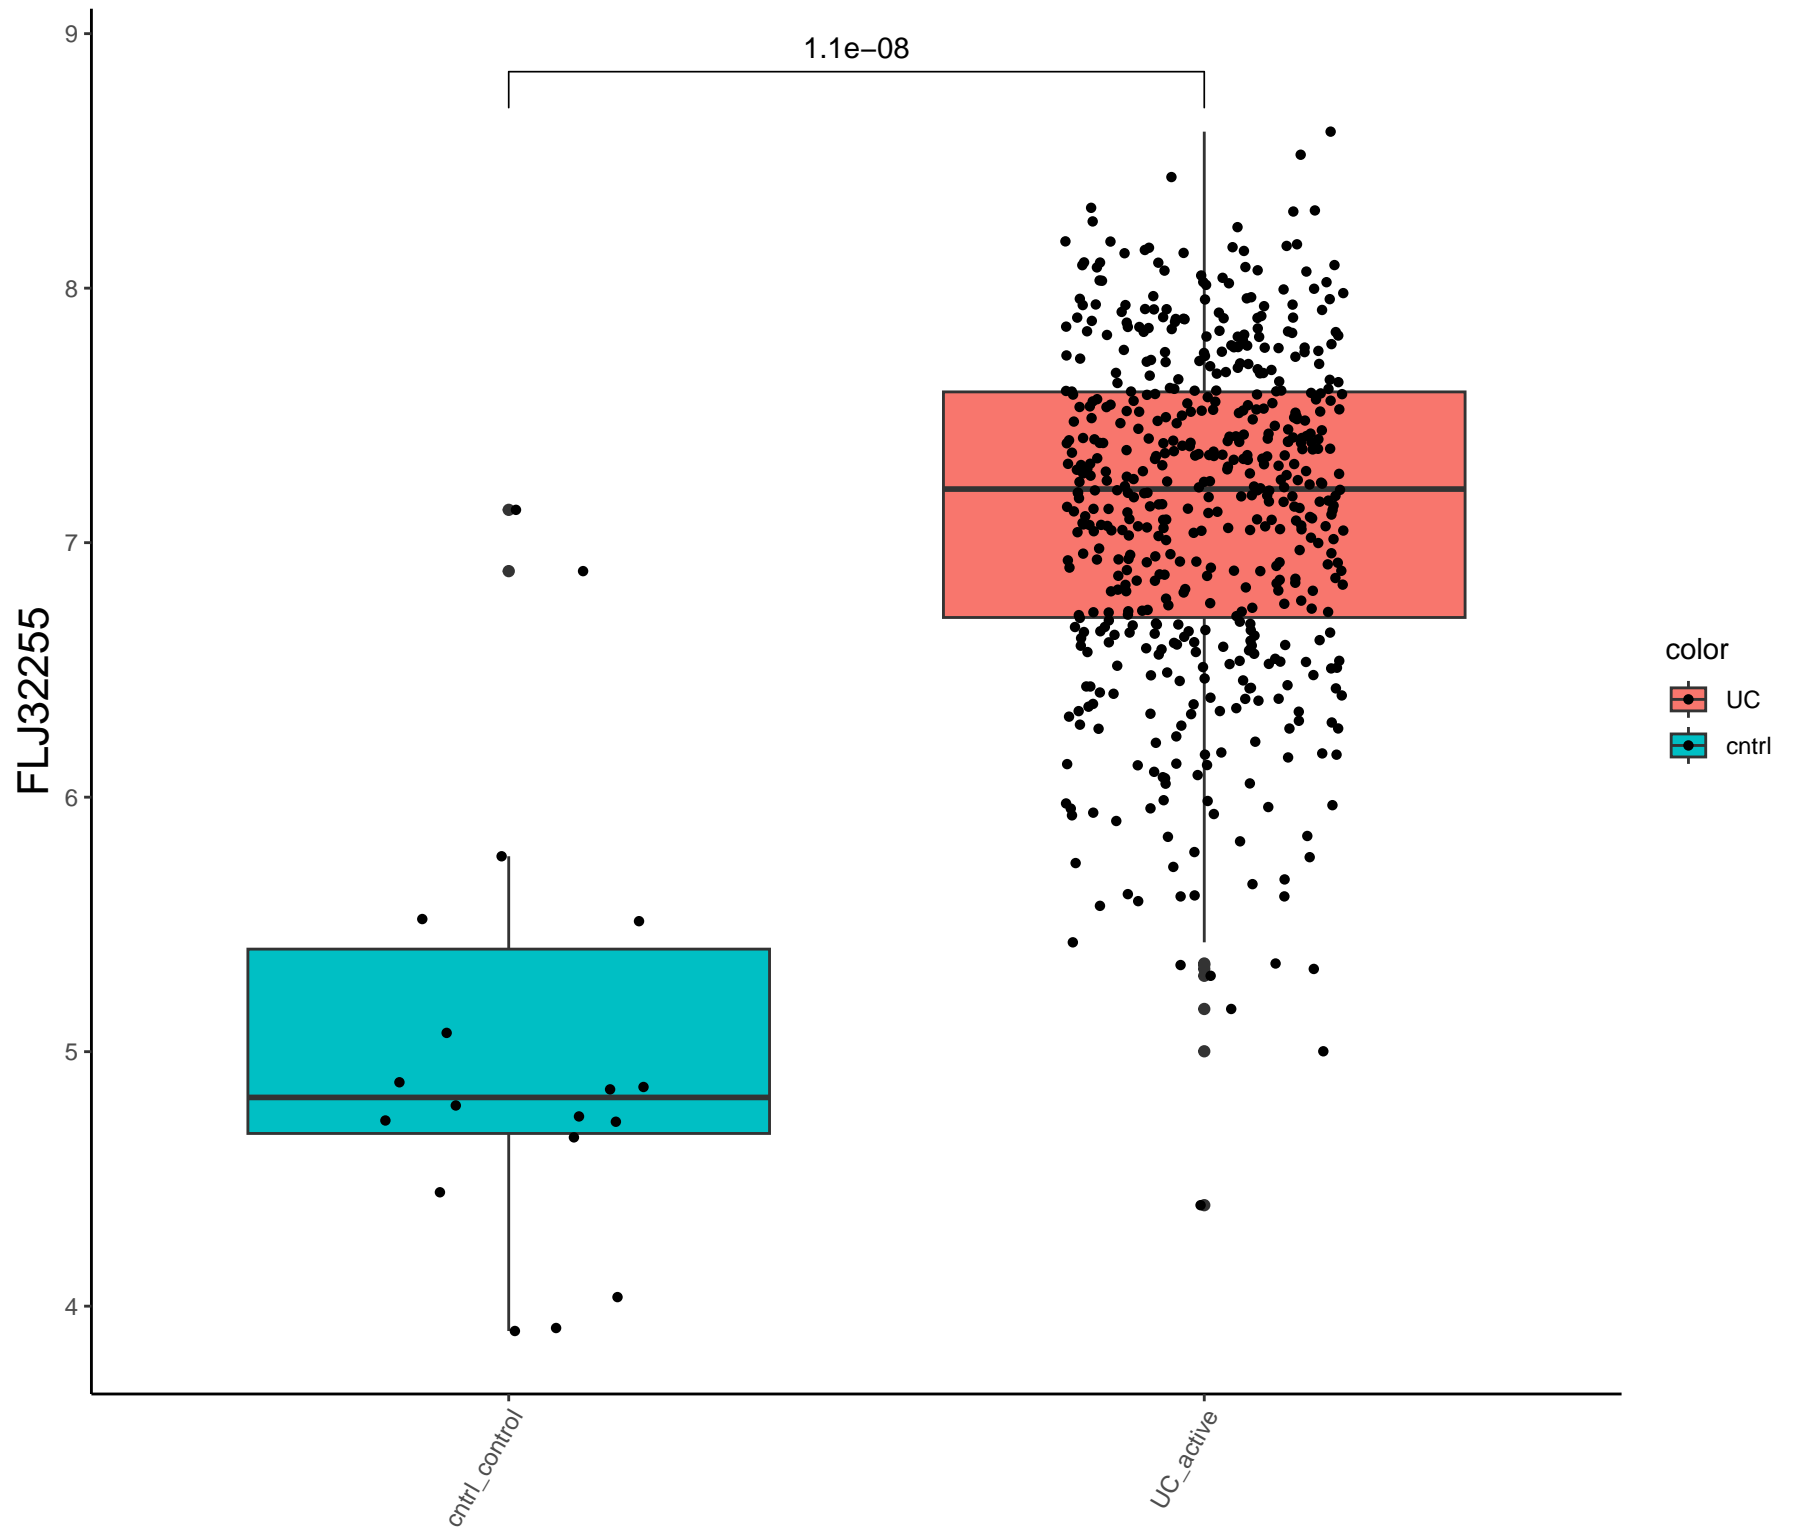

GSE47908

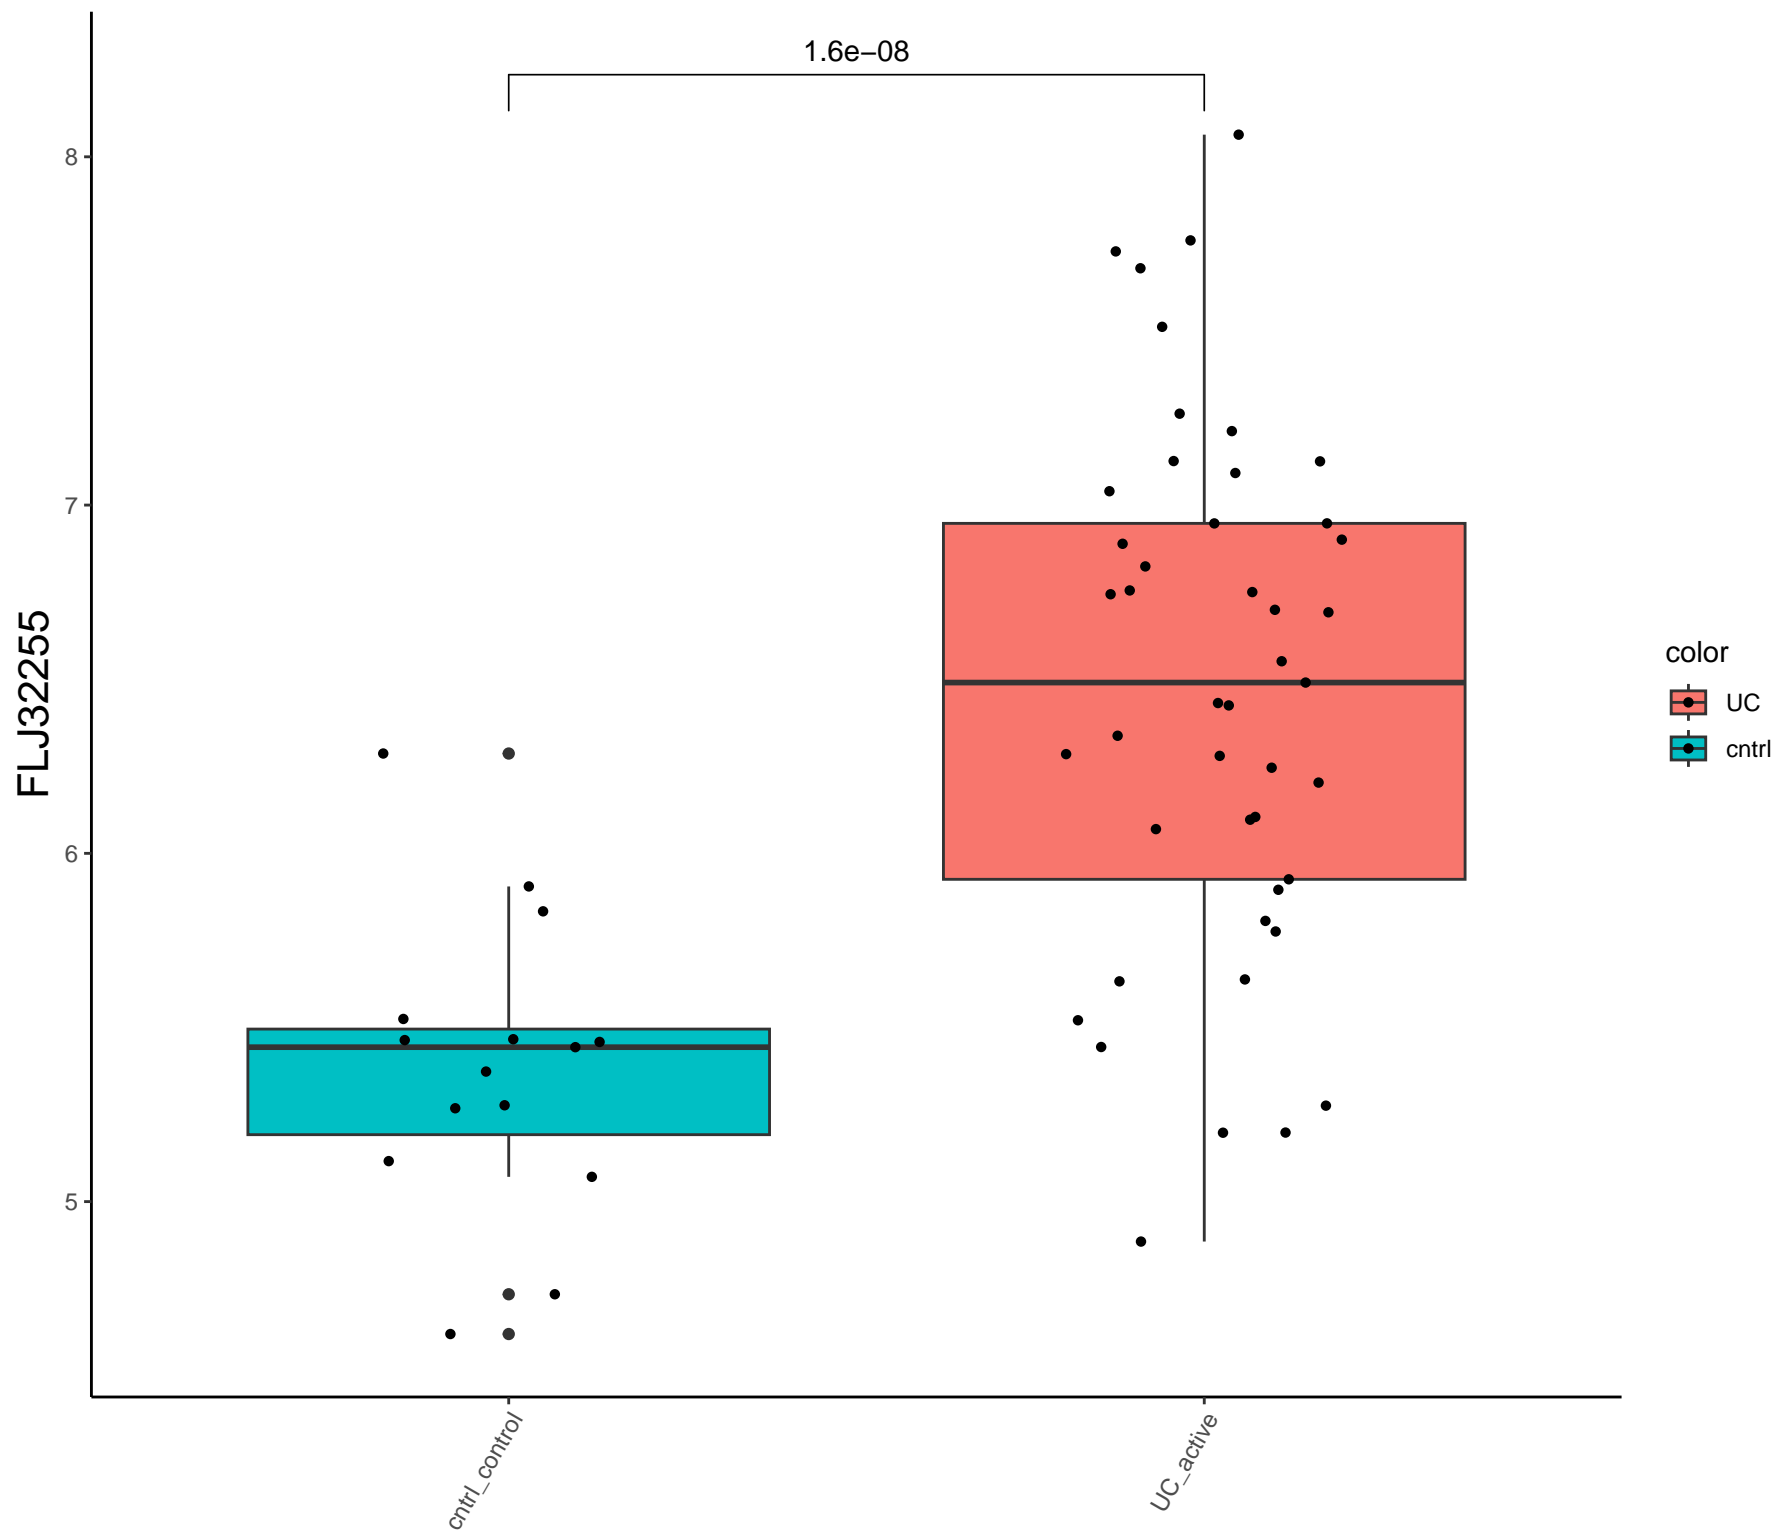



GSE87466

FLJ32255

$9.9\text{e-}16$

color

UC  
cntrl

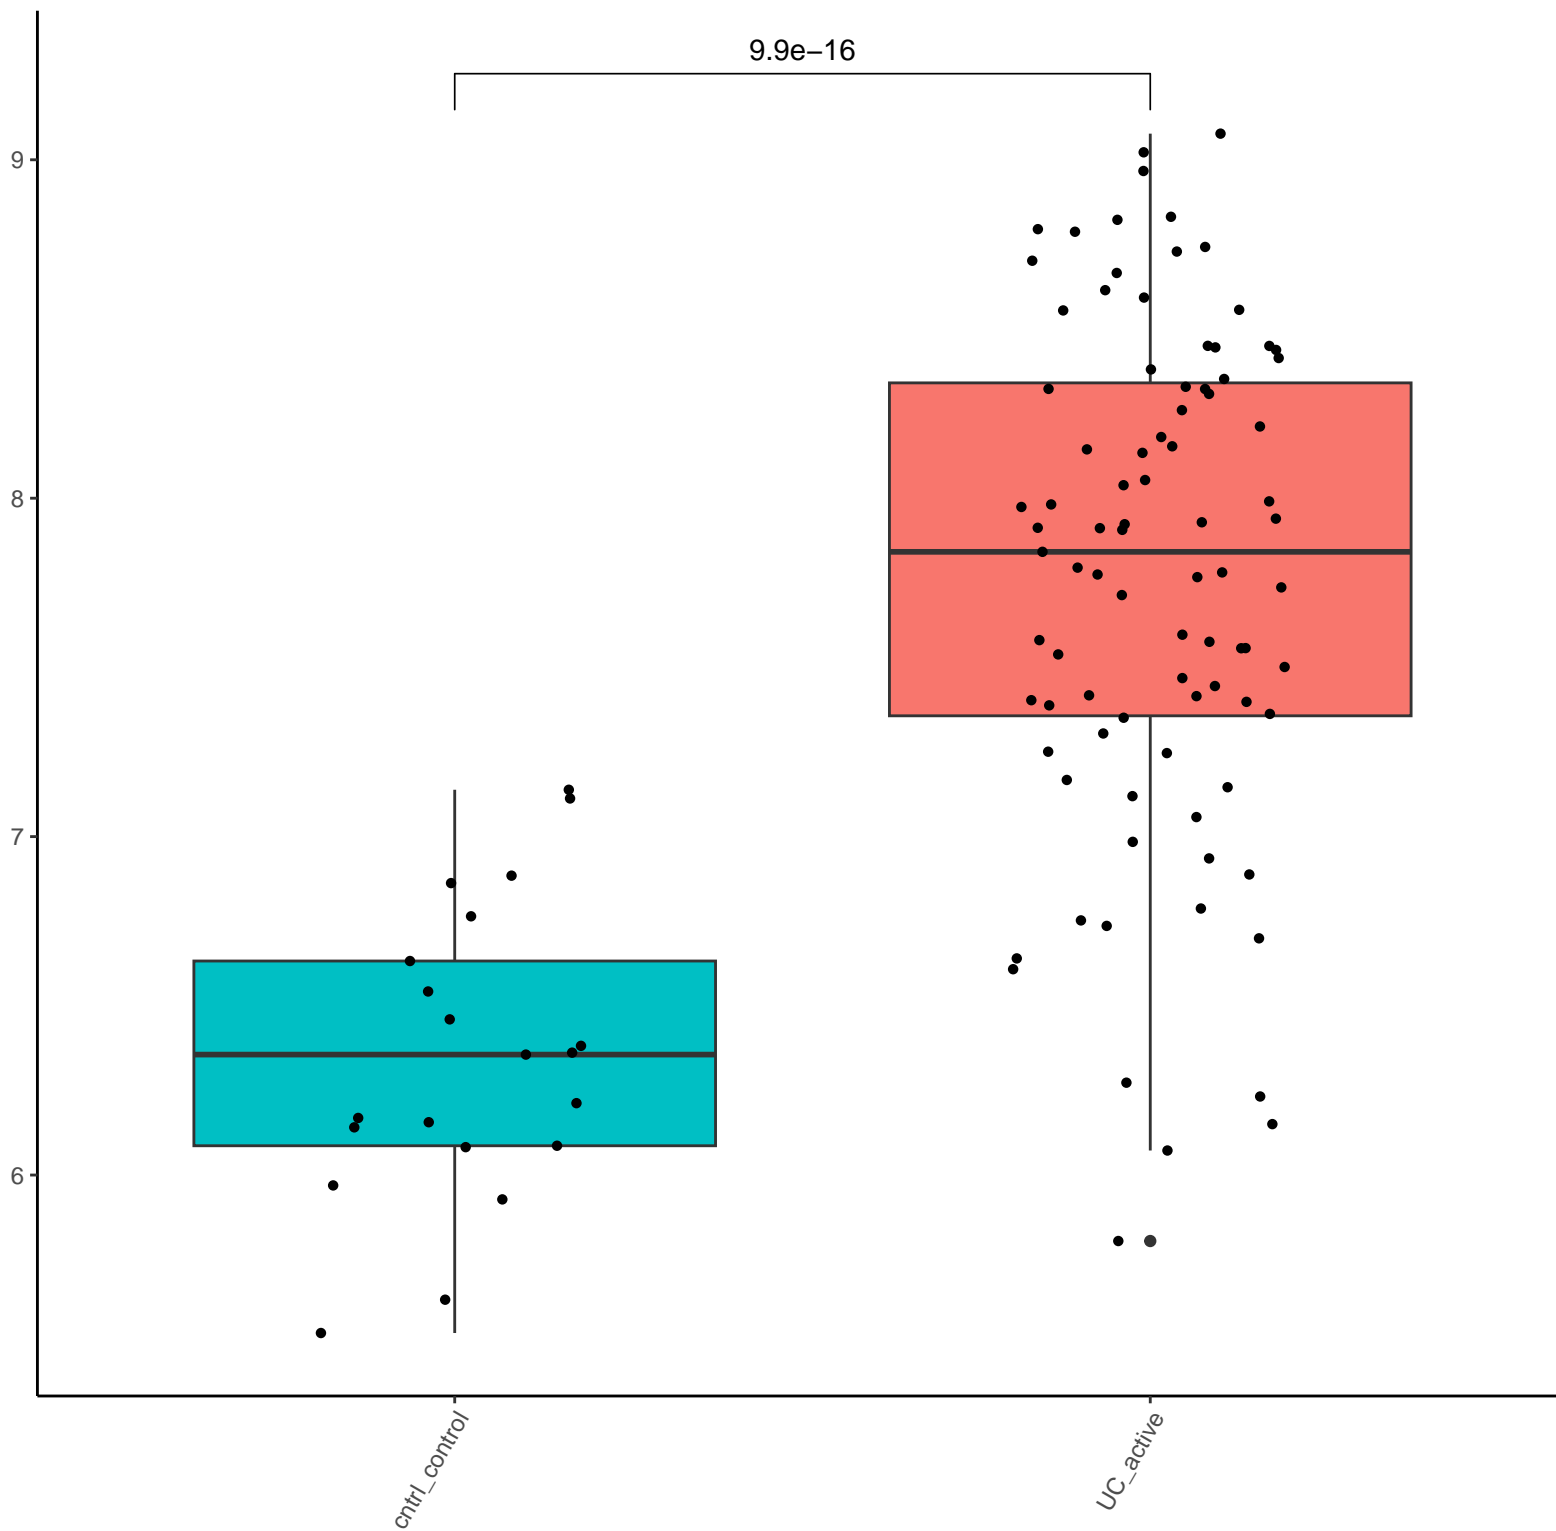

GSE92415

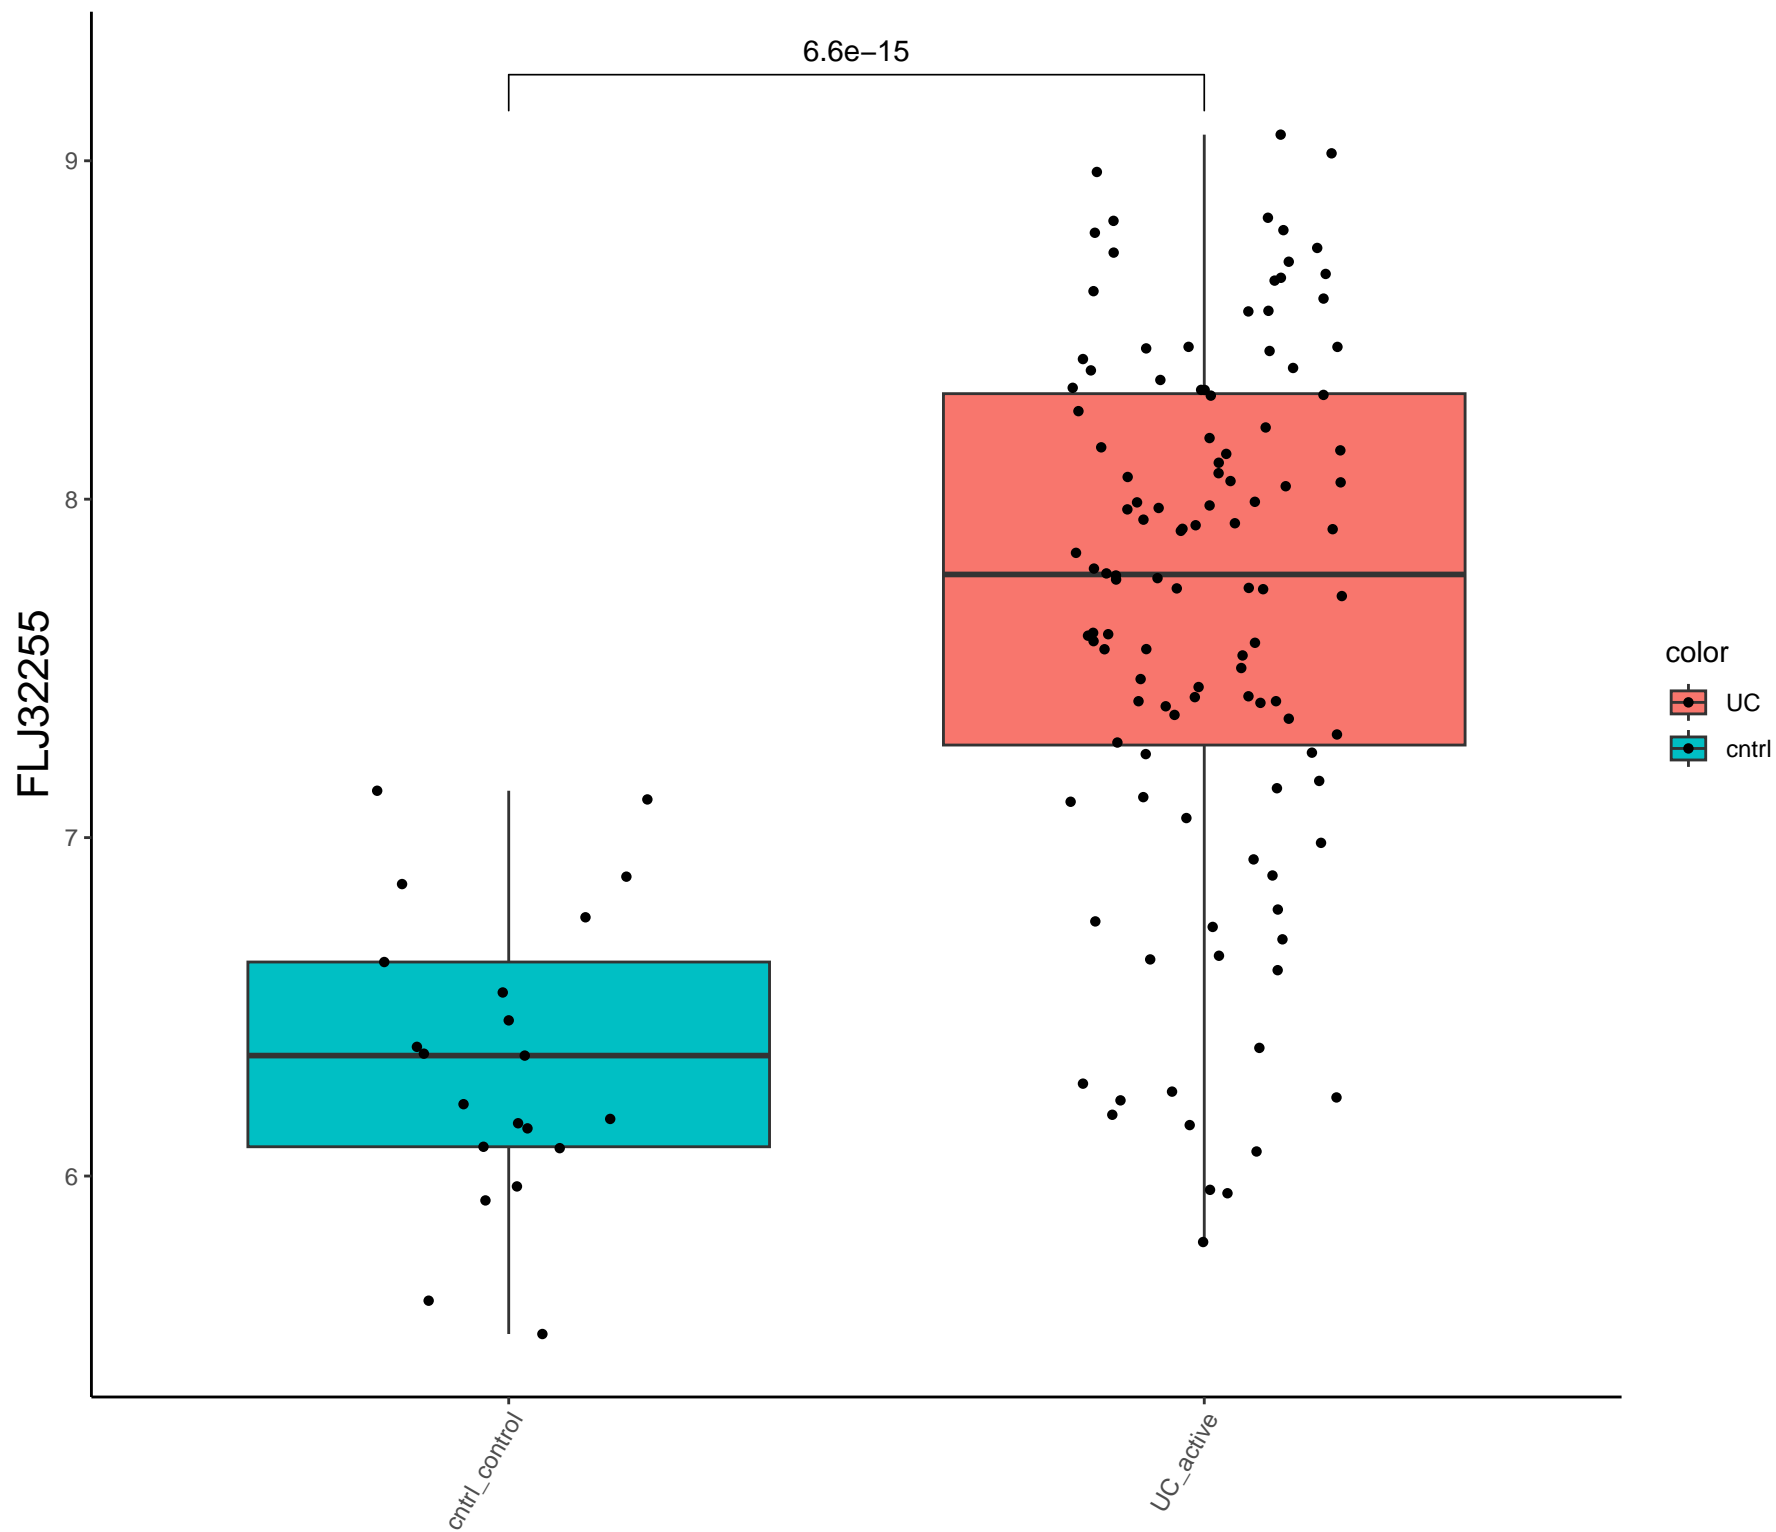

GSE109142

FOXD2-AS1

$3.9\text{e-}10$

cntrl\_control

UC\_active

color

- UC
- cntrl

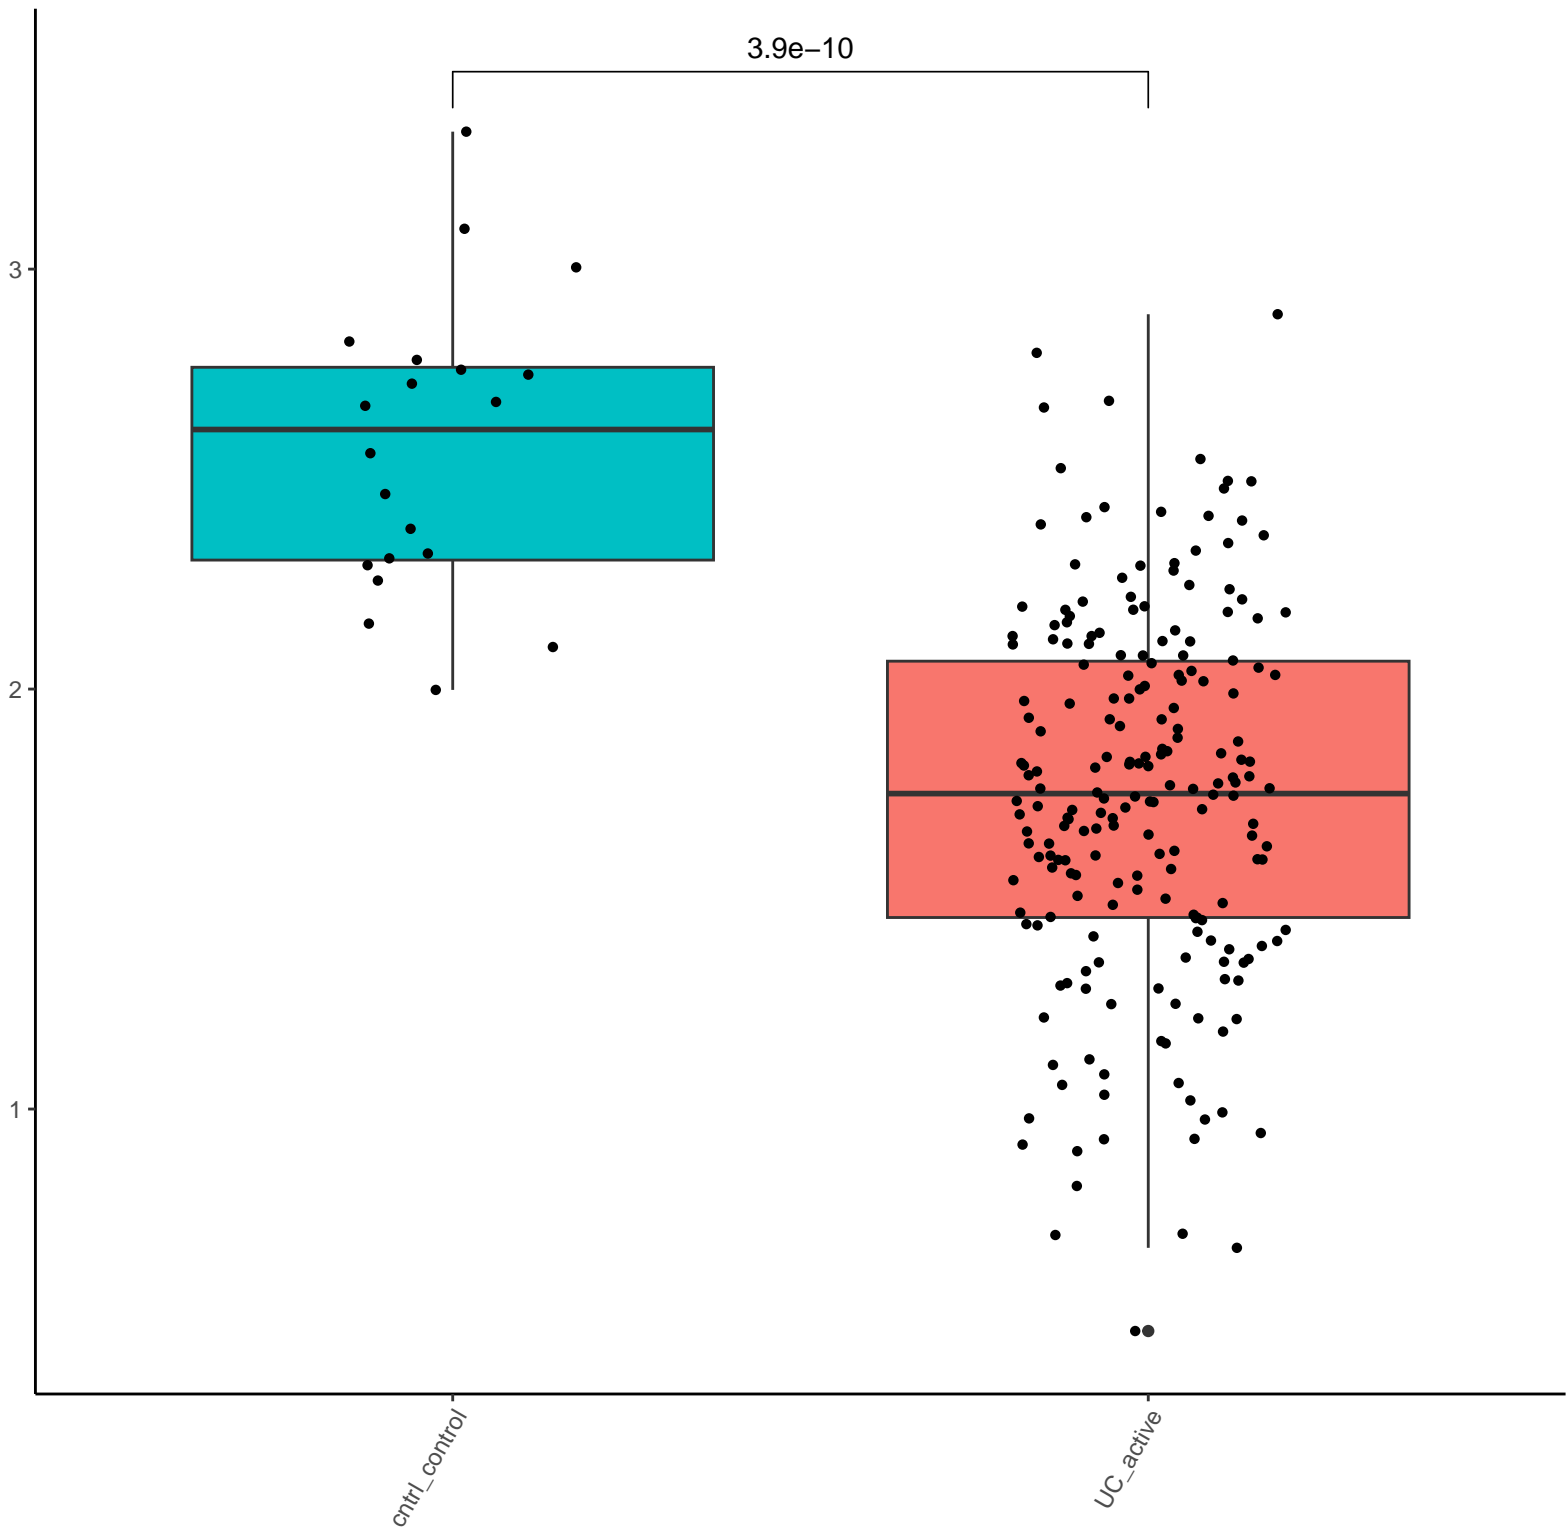

GSE128682

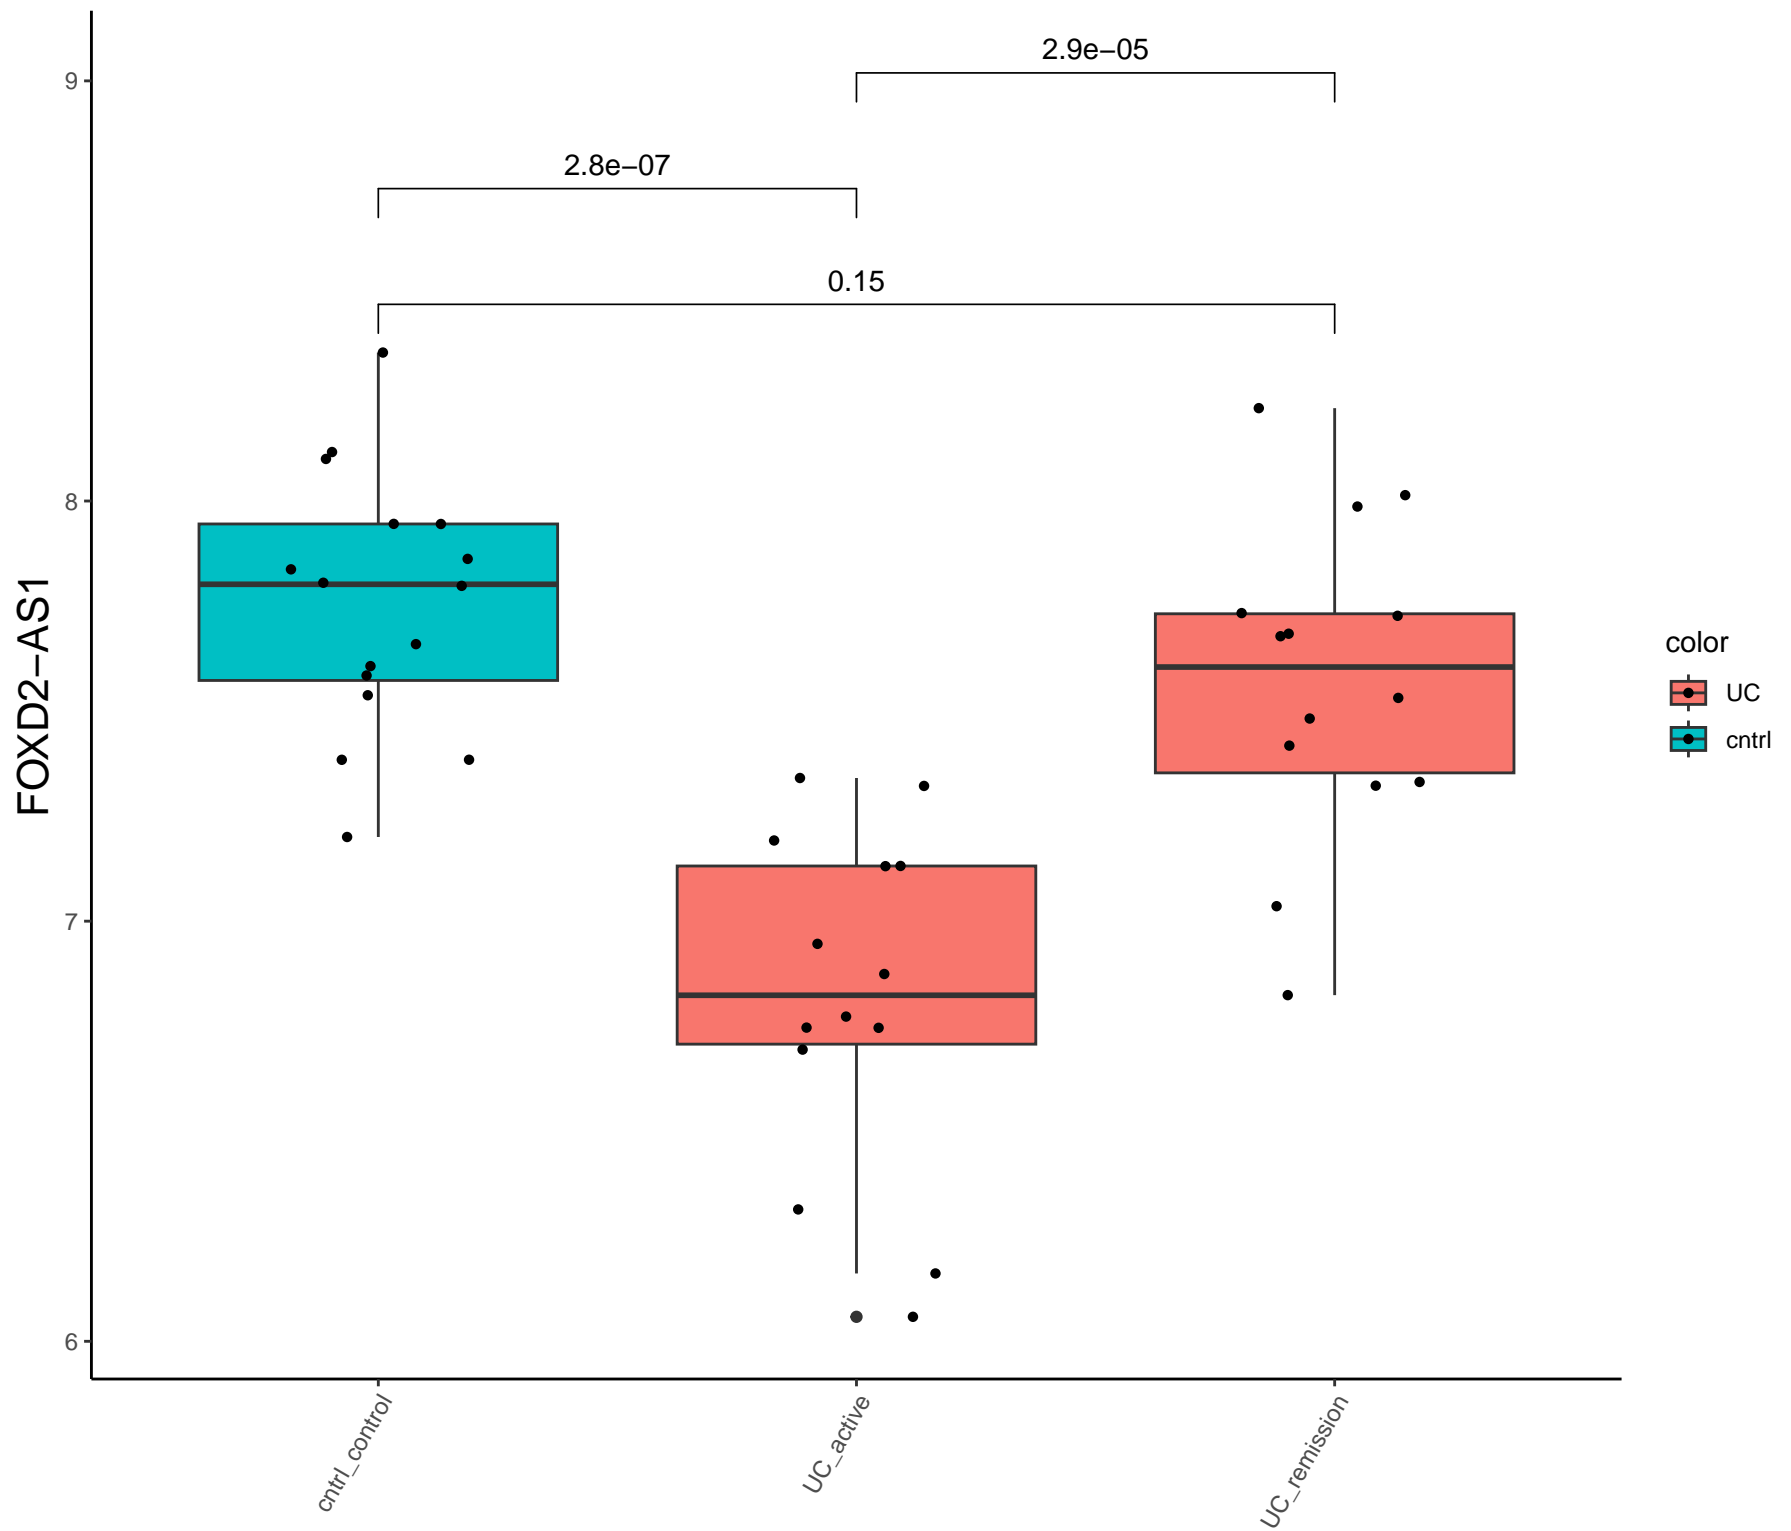

GSE16879

FOXD2-AS1

3.7e-05

color  
UC  
cntrl

cntrl\_control

UC\_active

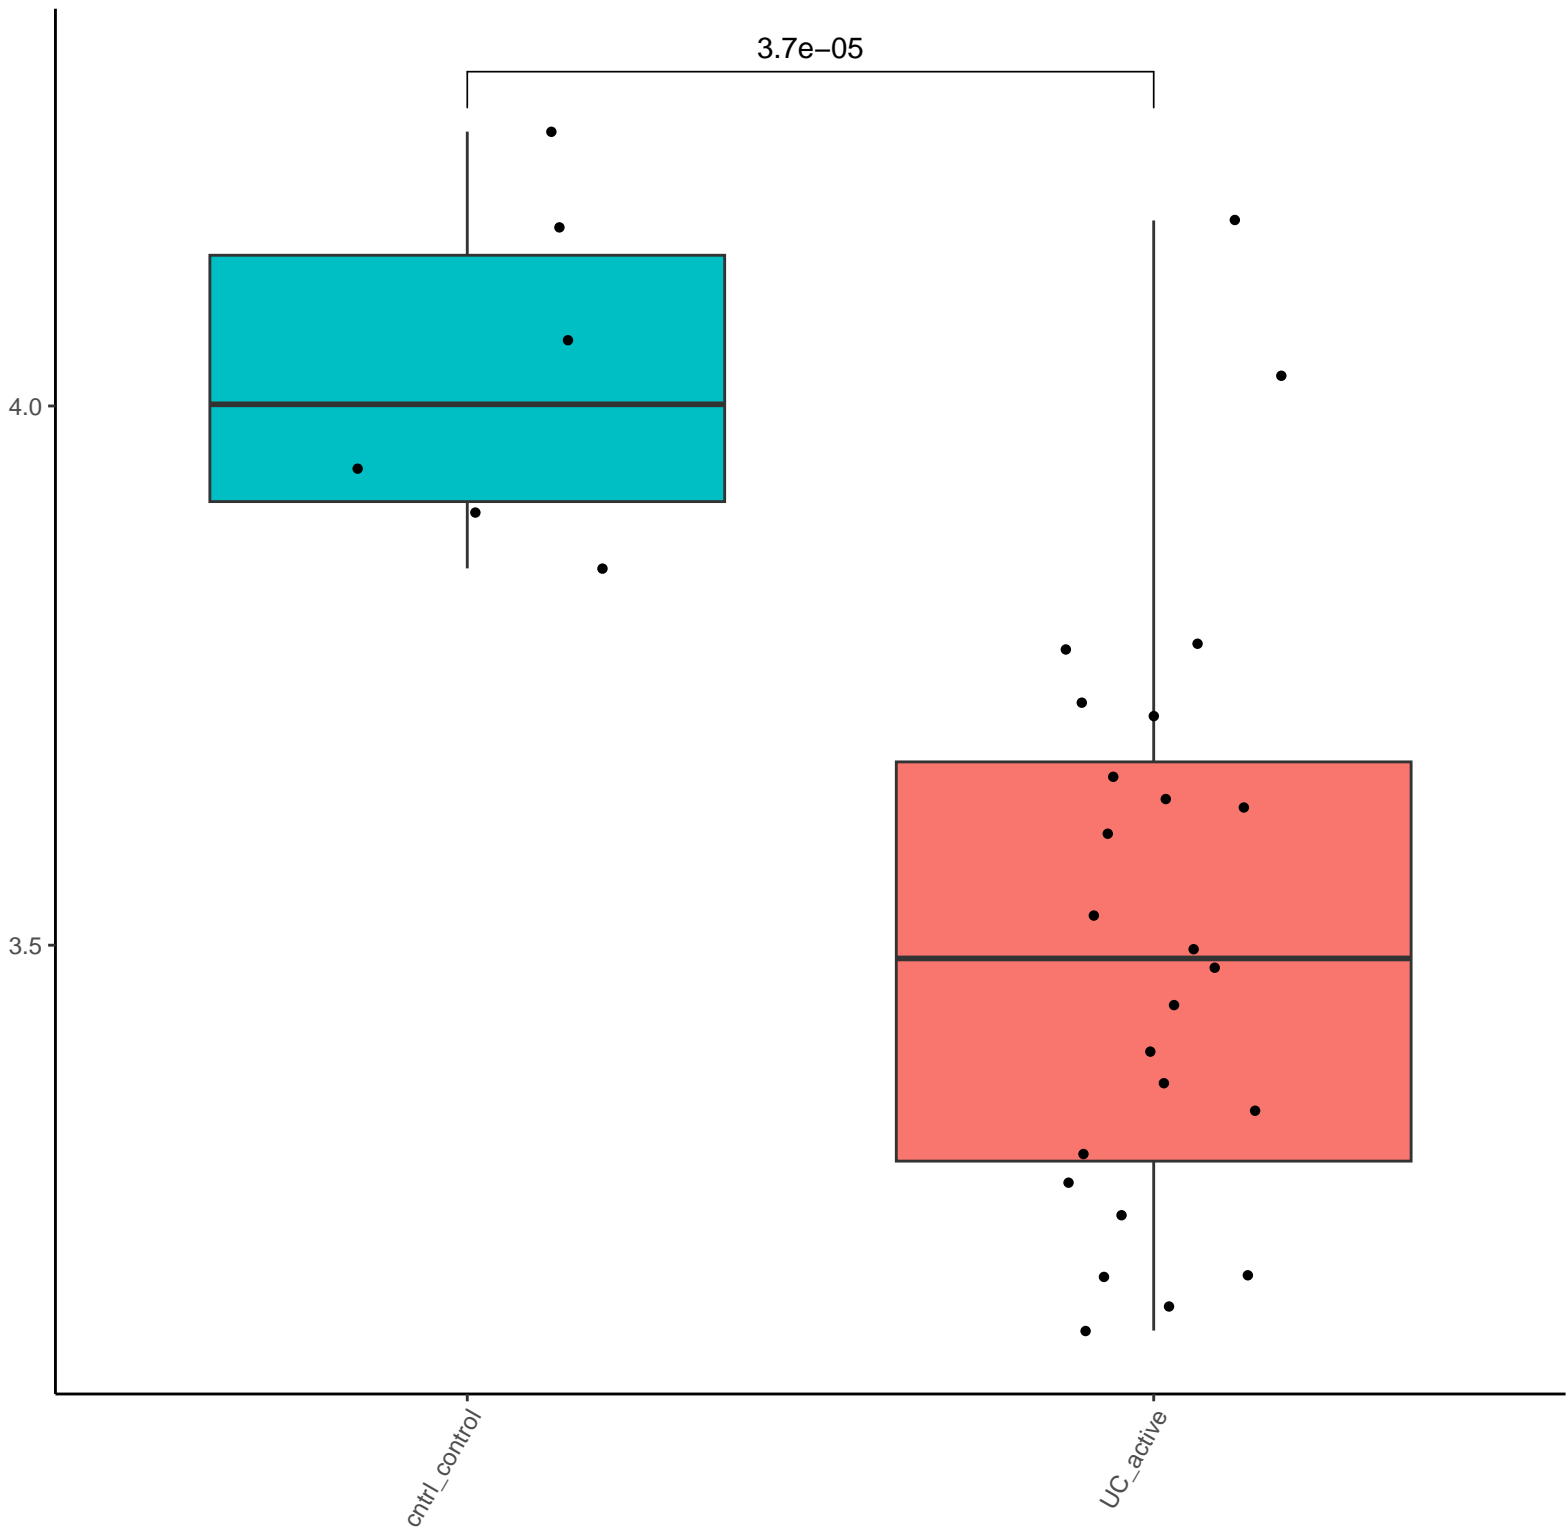

GSE206285

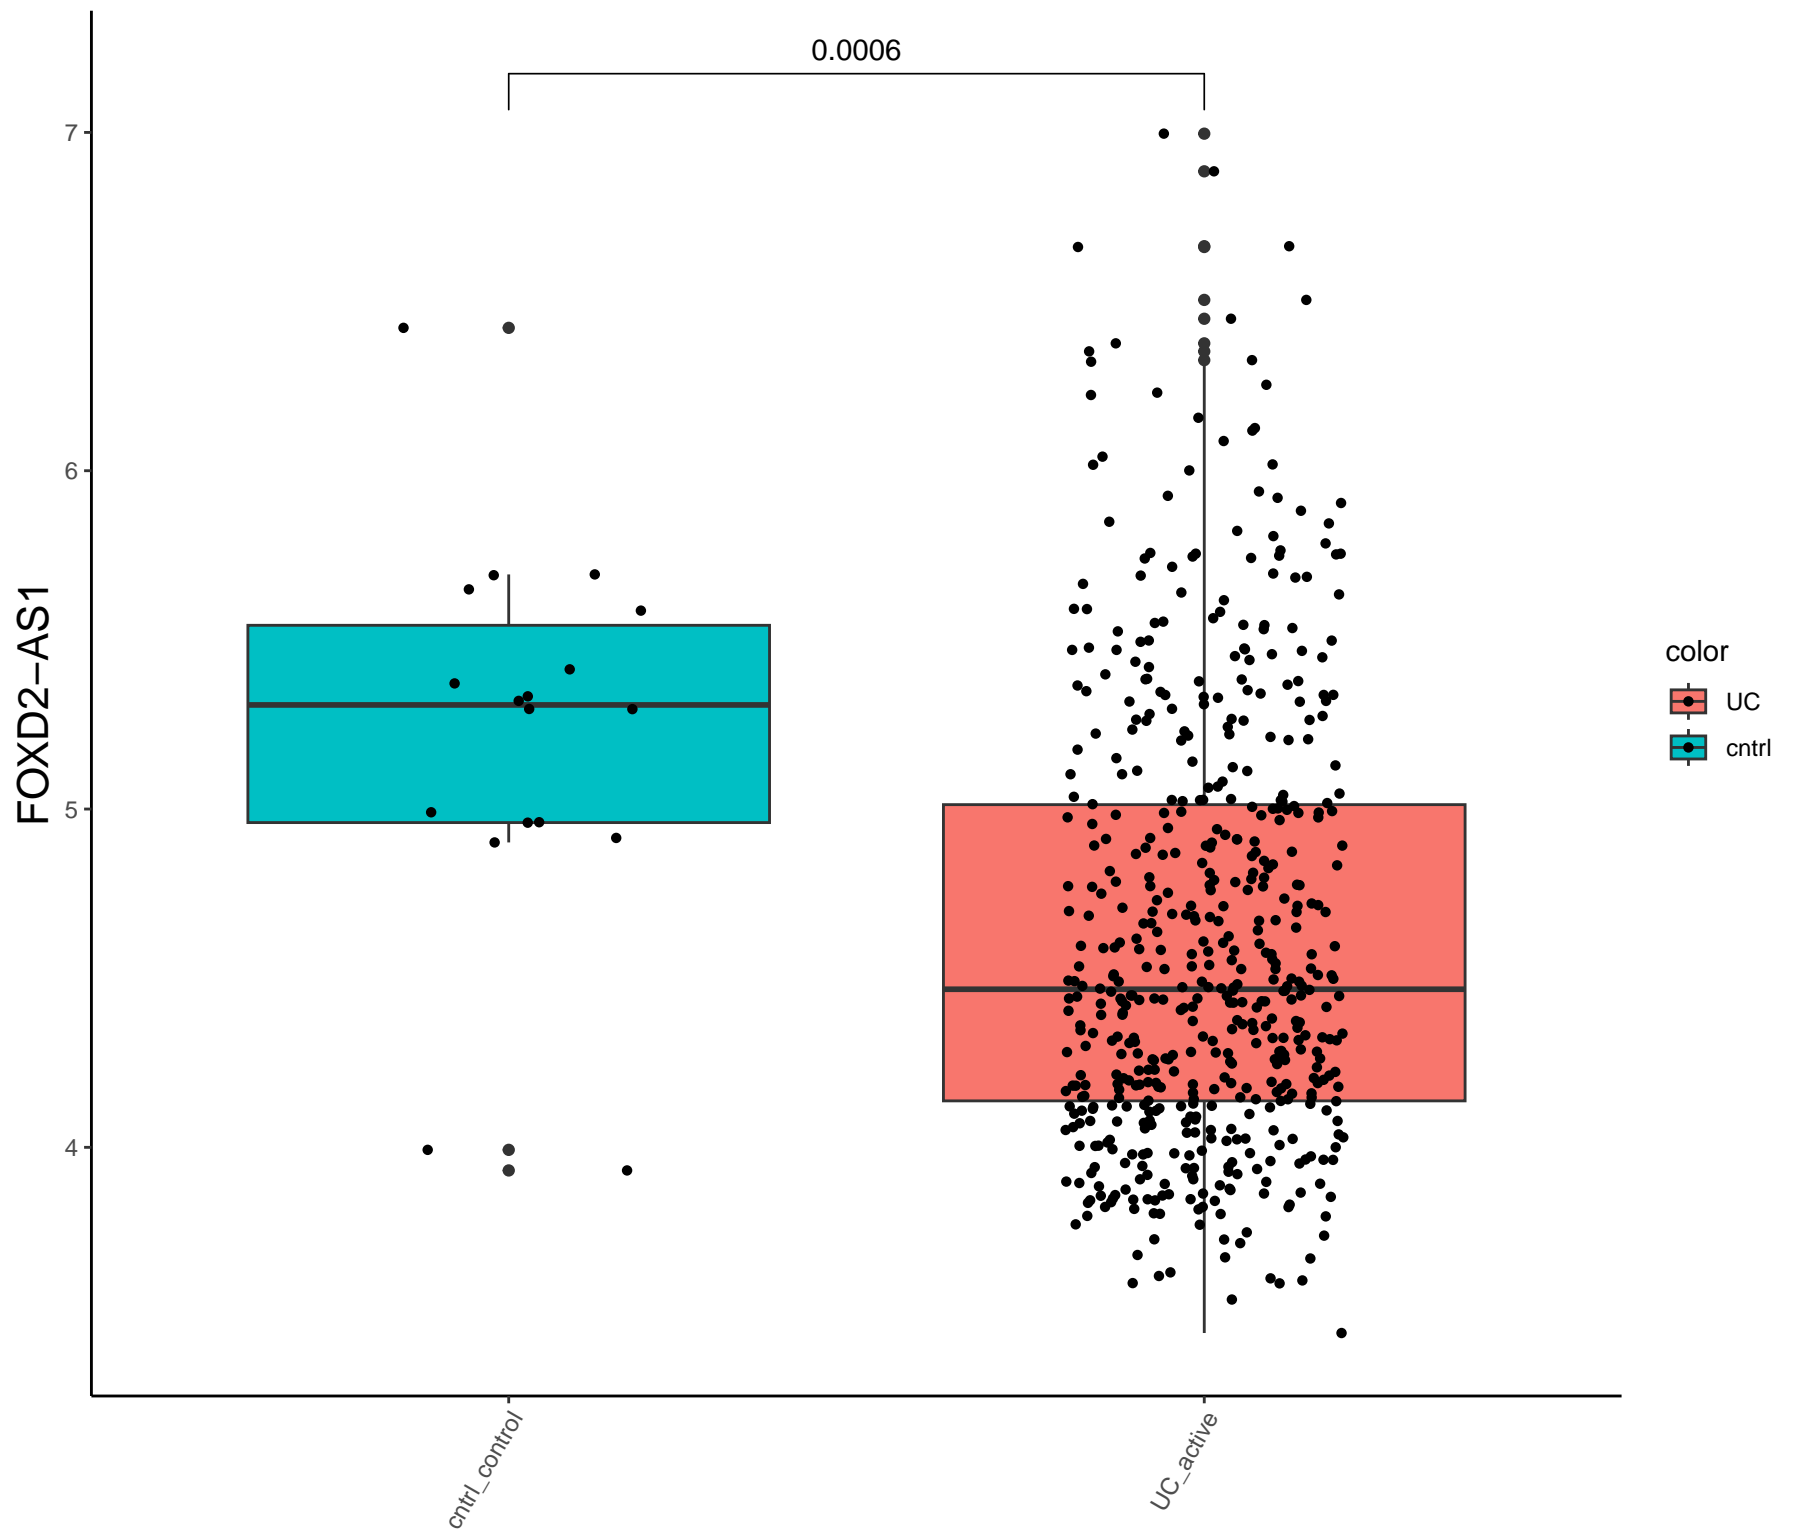

GSE47908

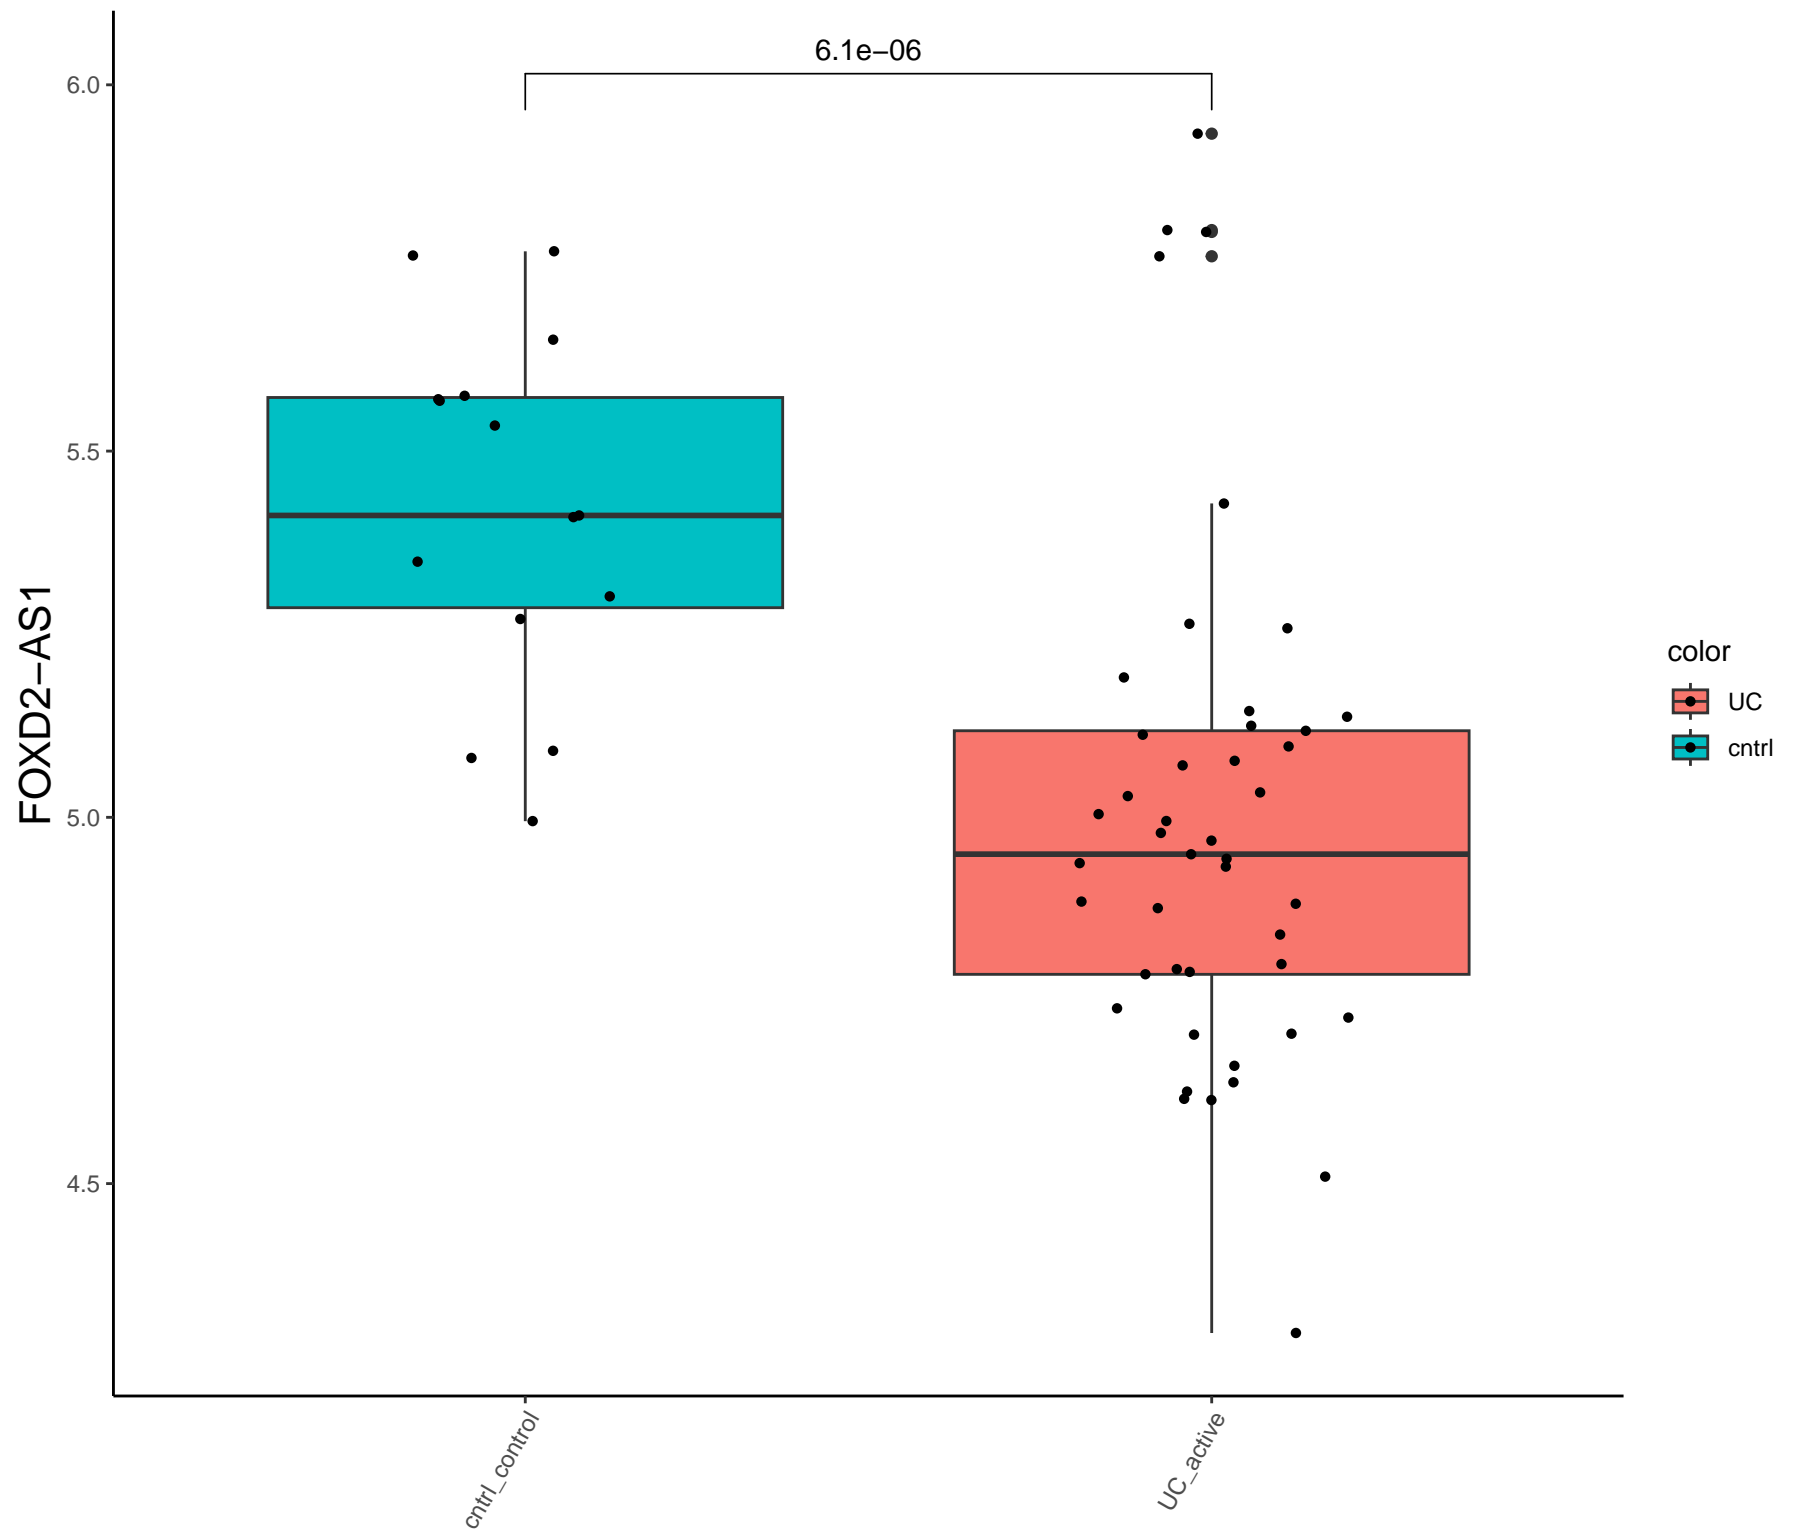

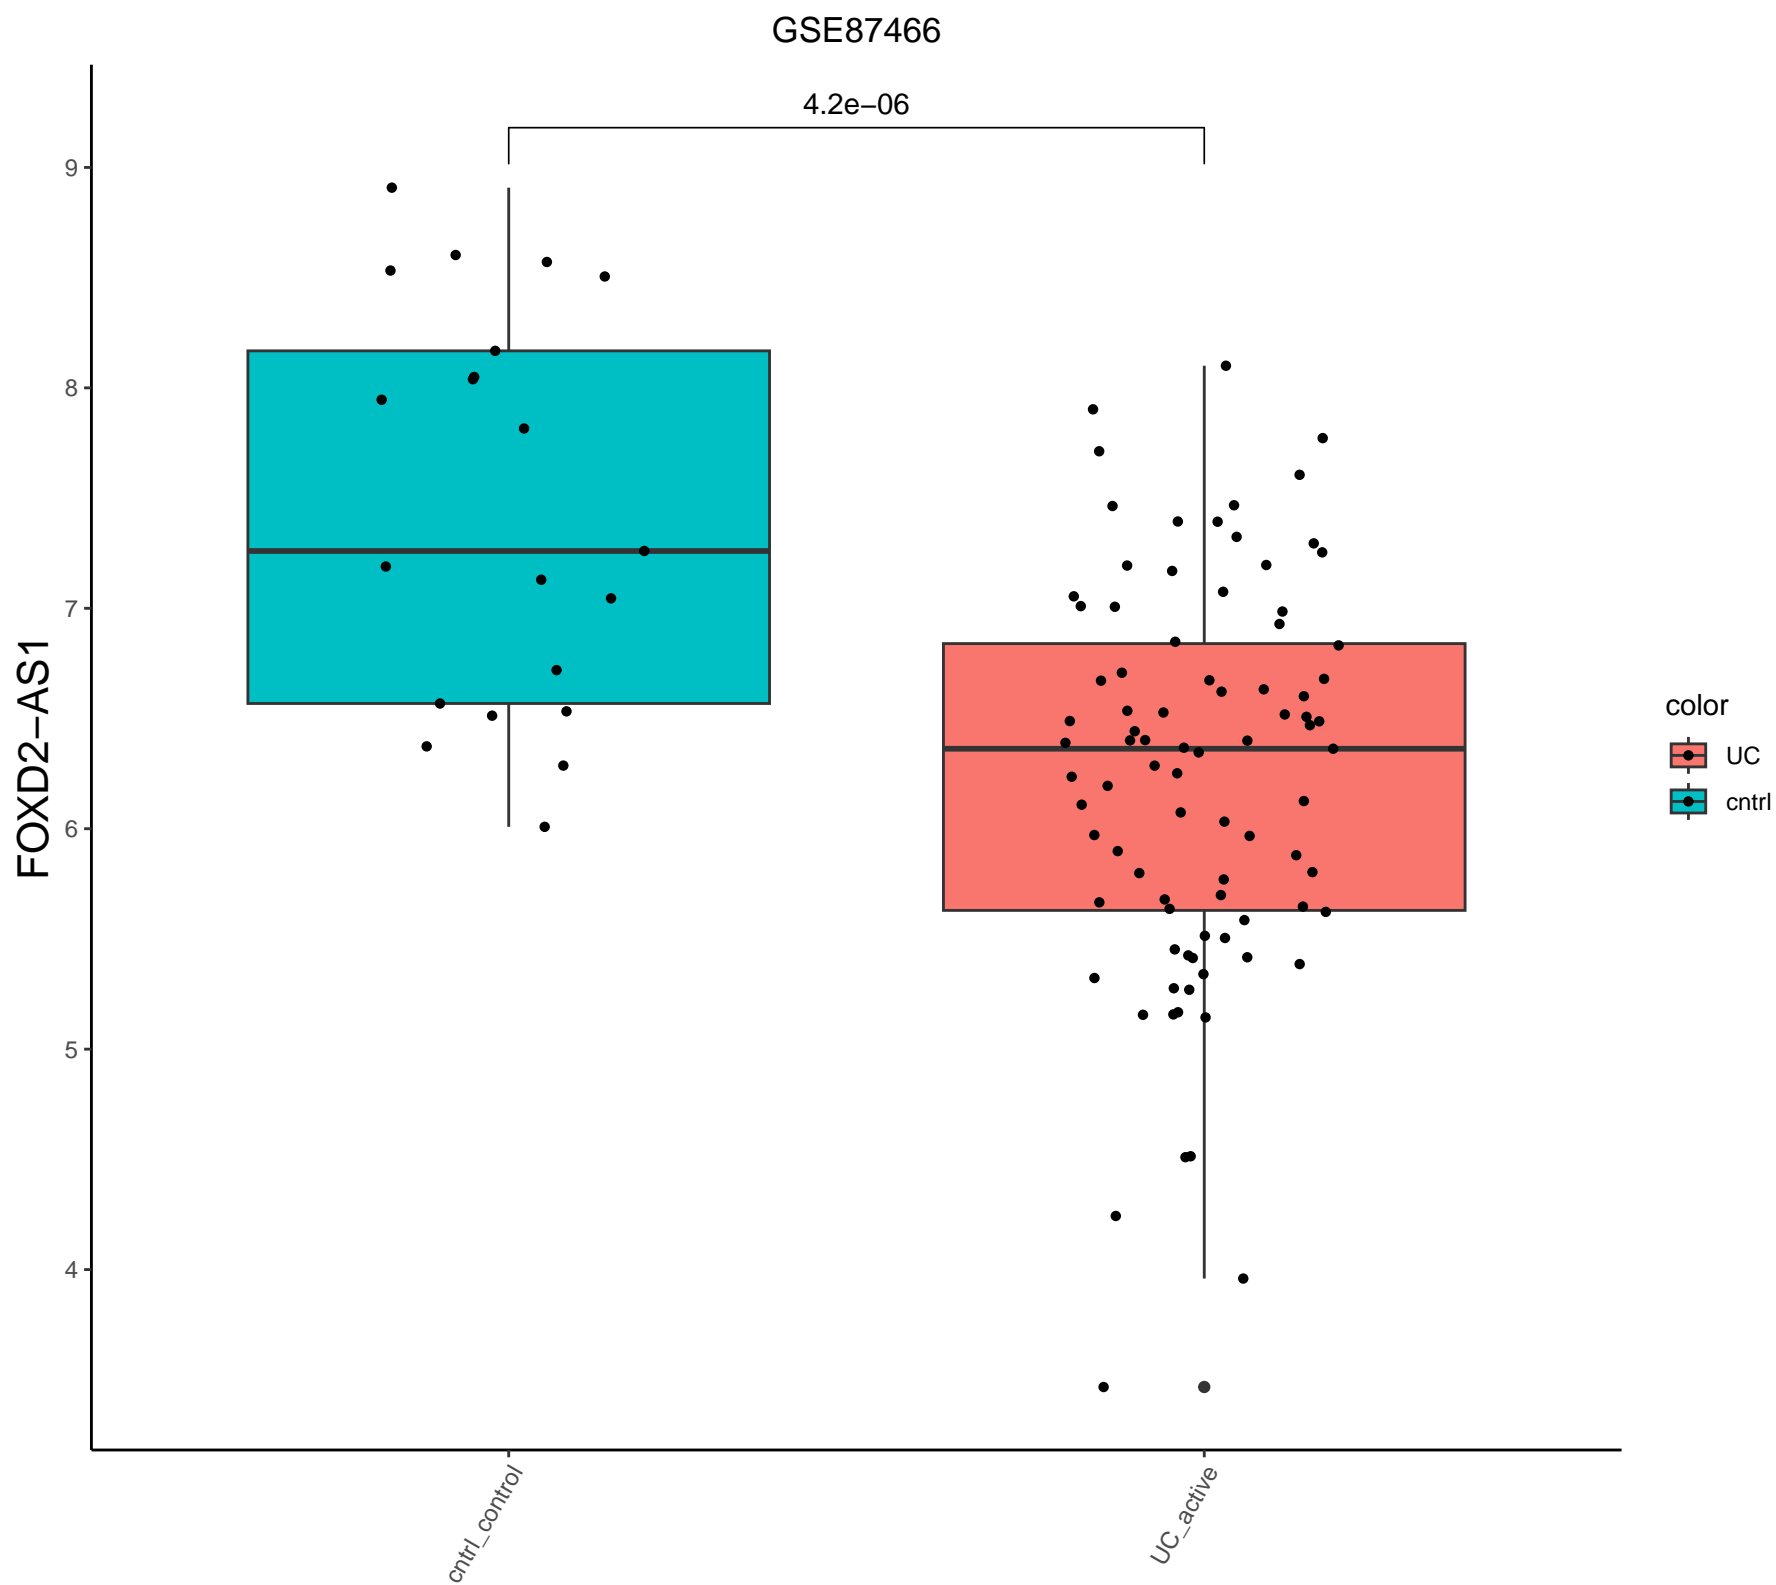



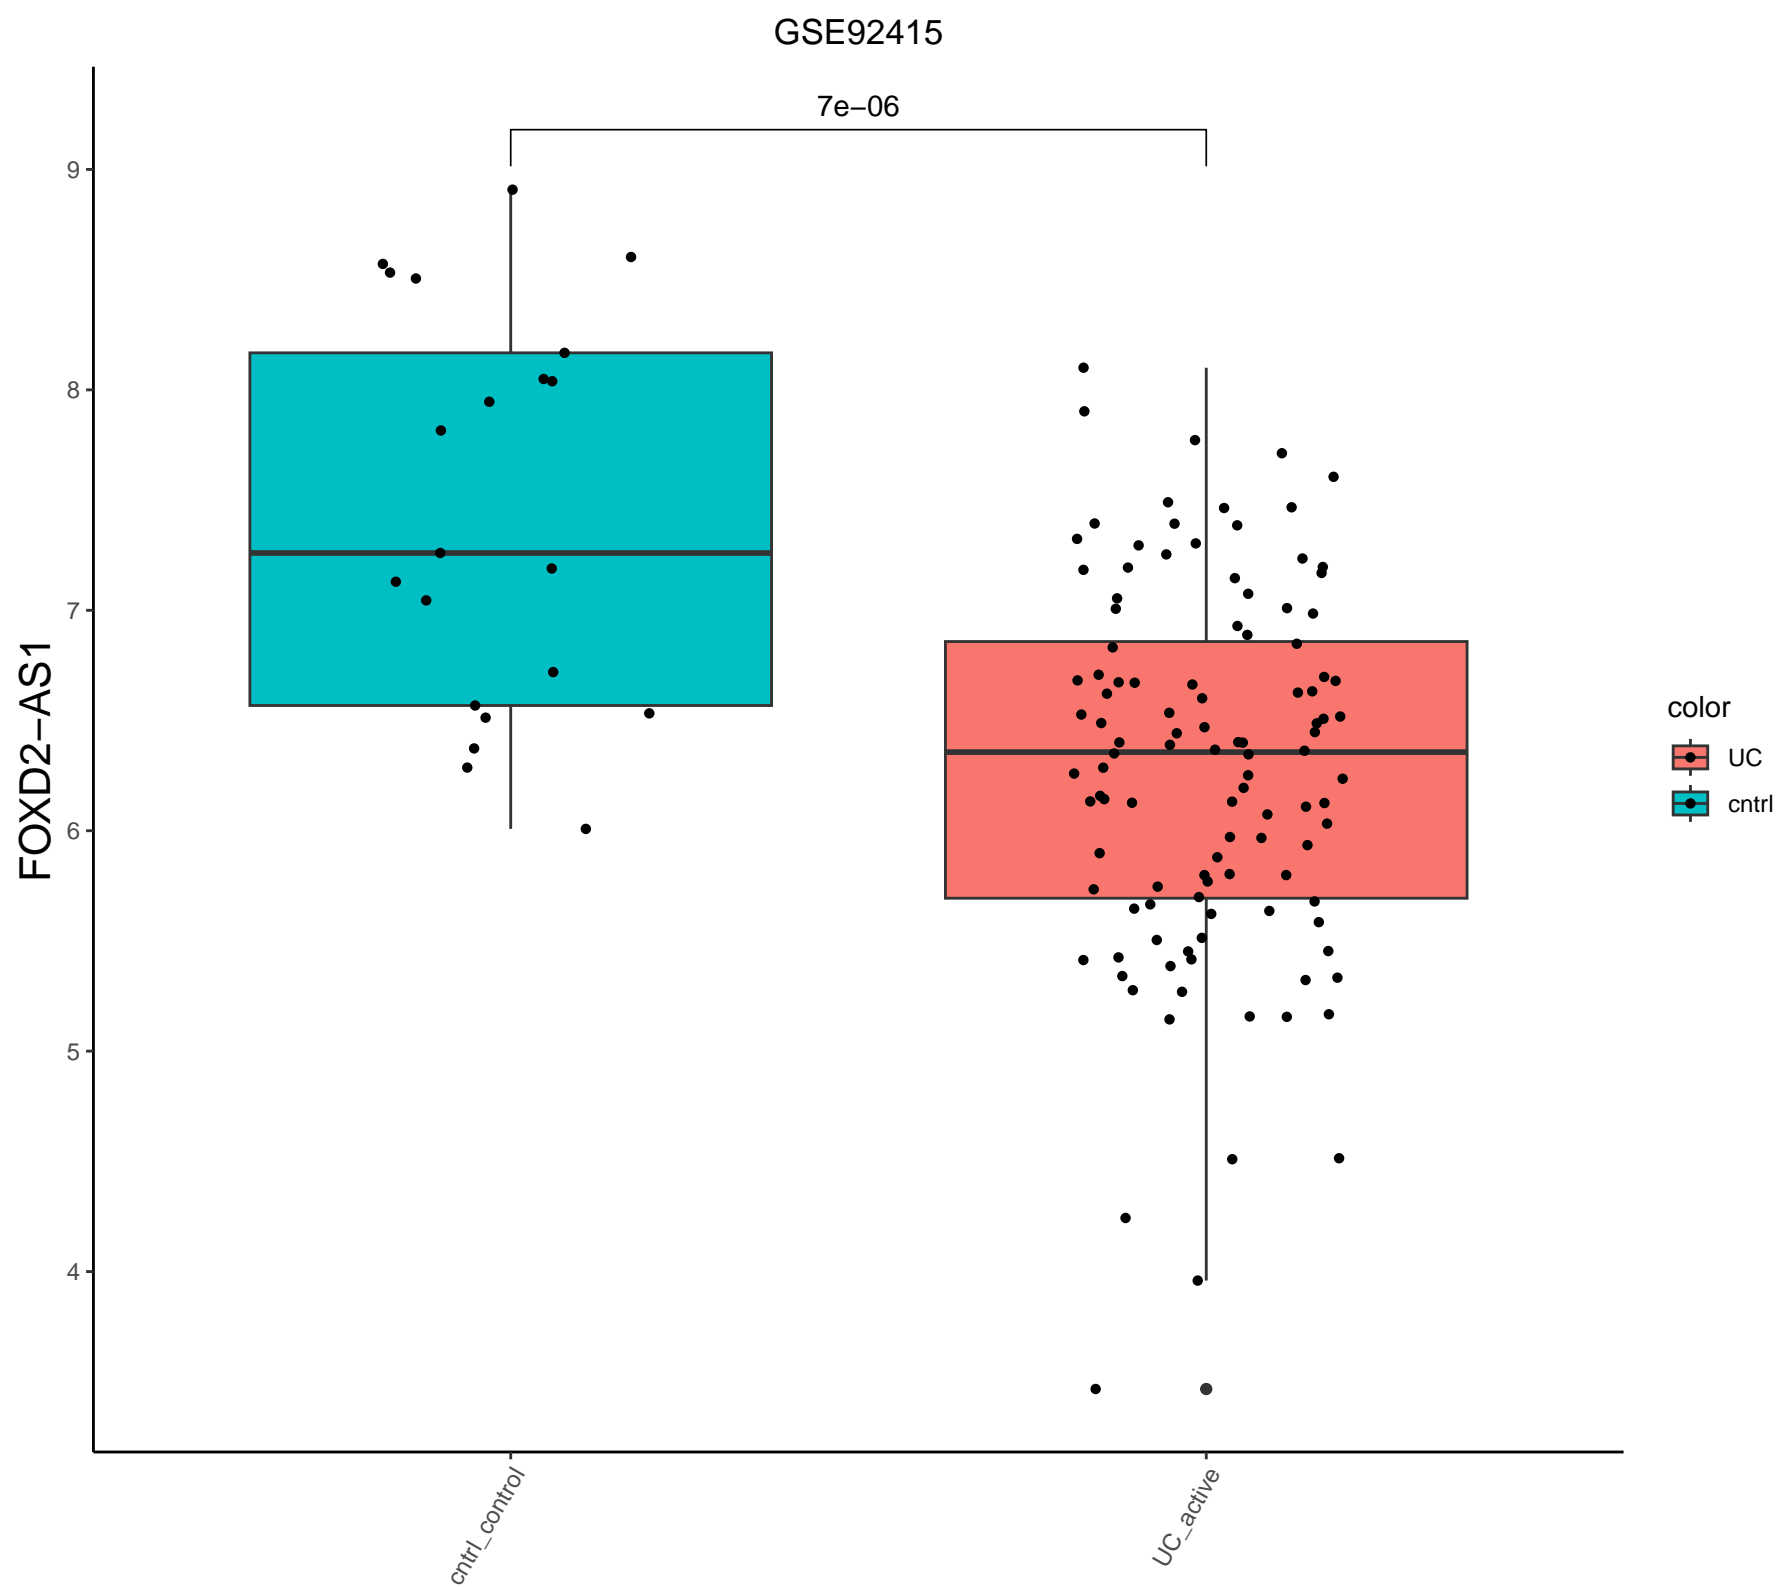

GSE109142

GATA6-AS1

1.4e-06

cntrl\_control

UC\_active

color

UC

cntrl

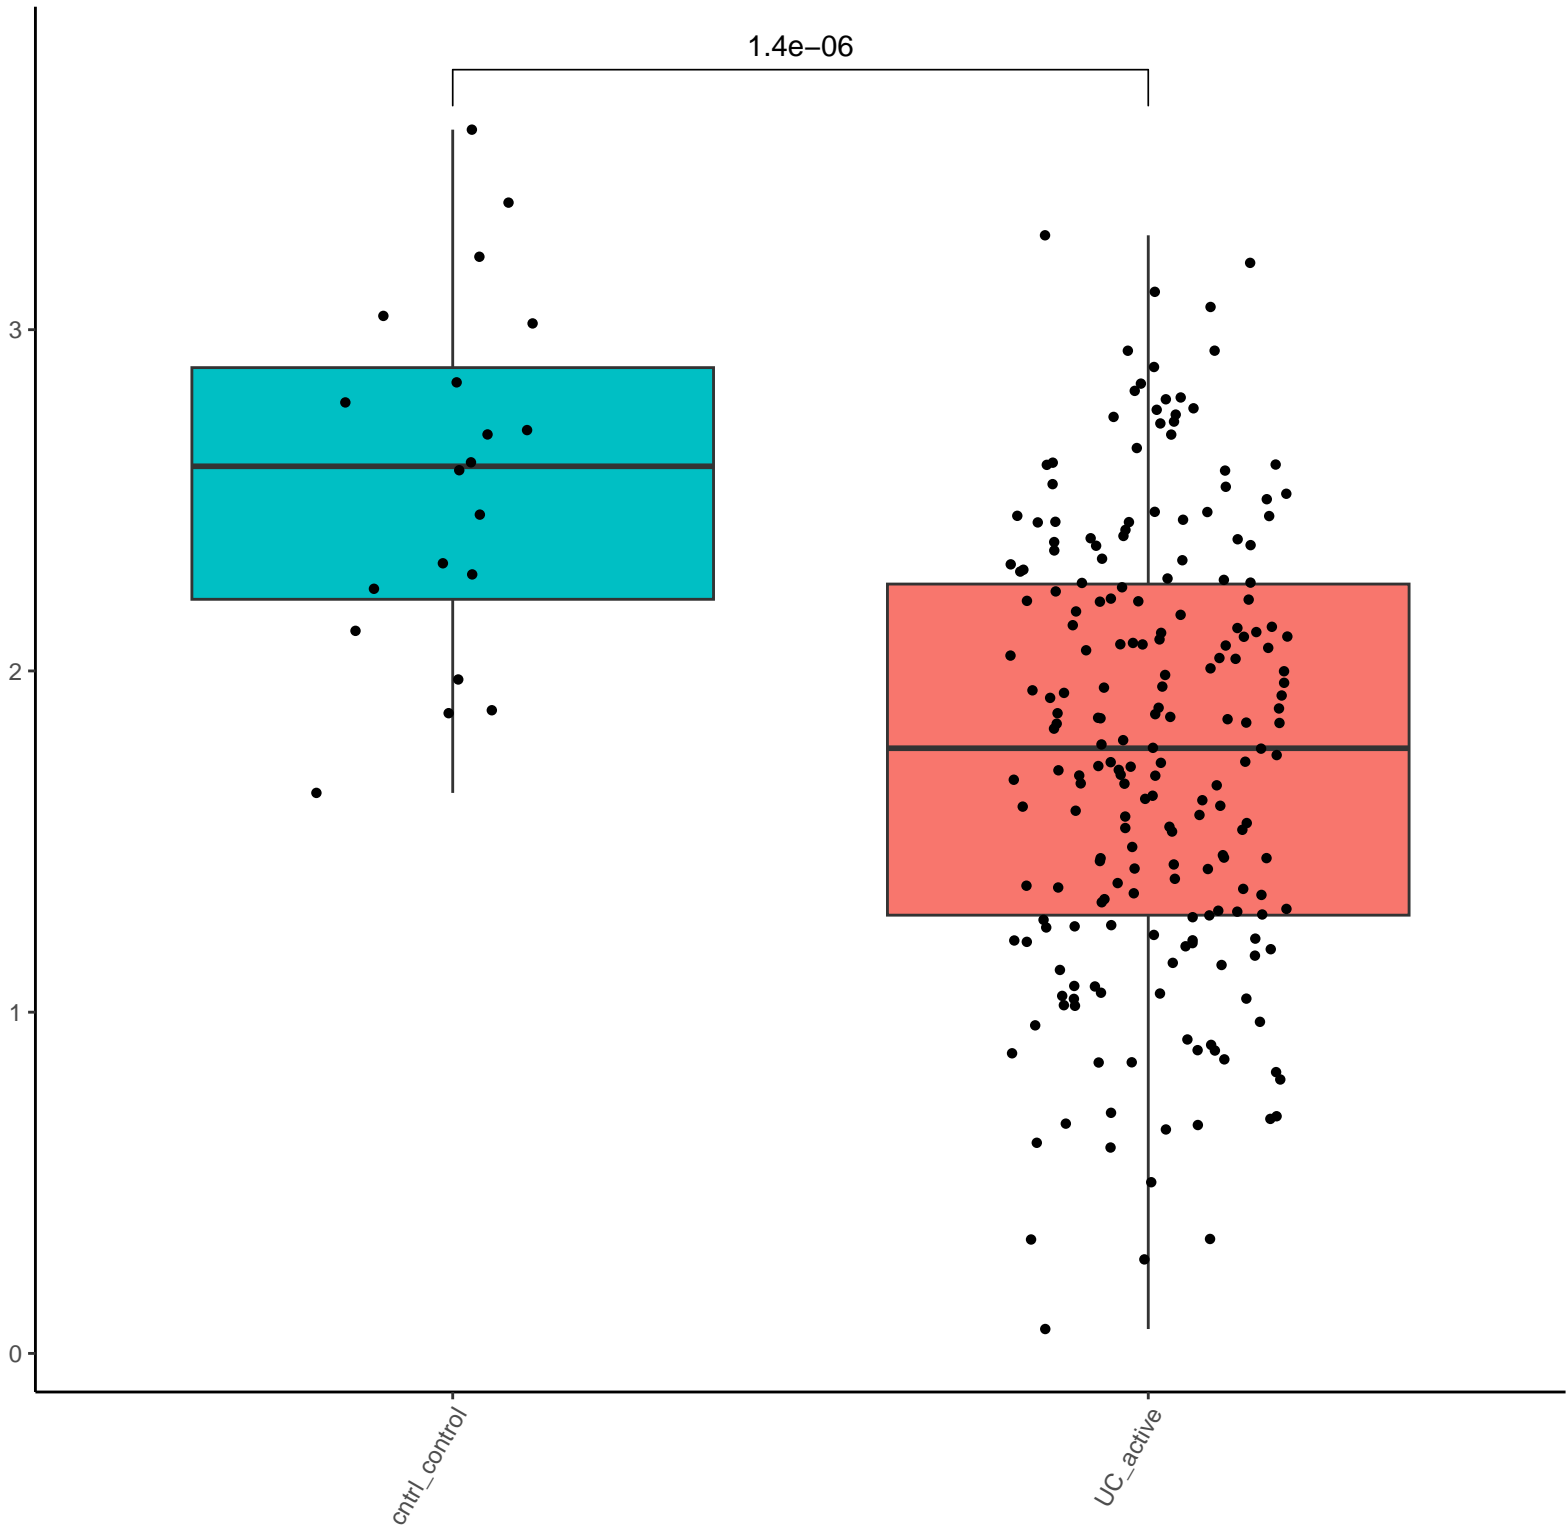

GSE128682

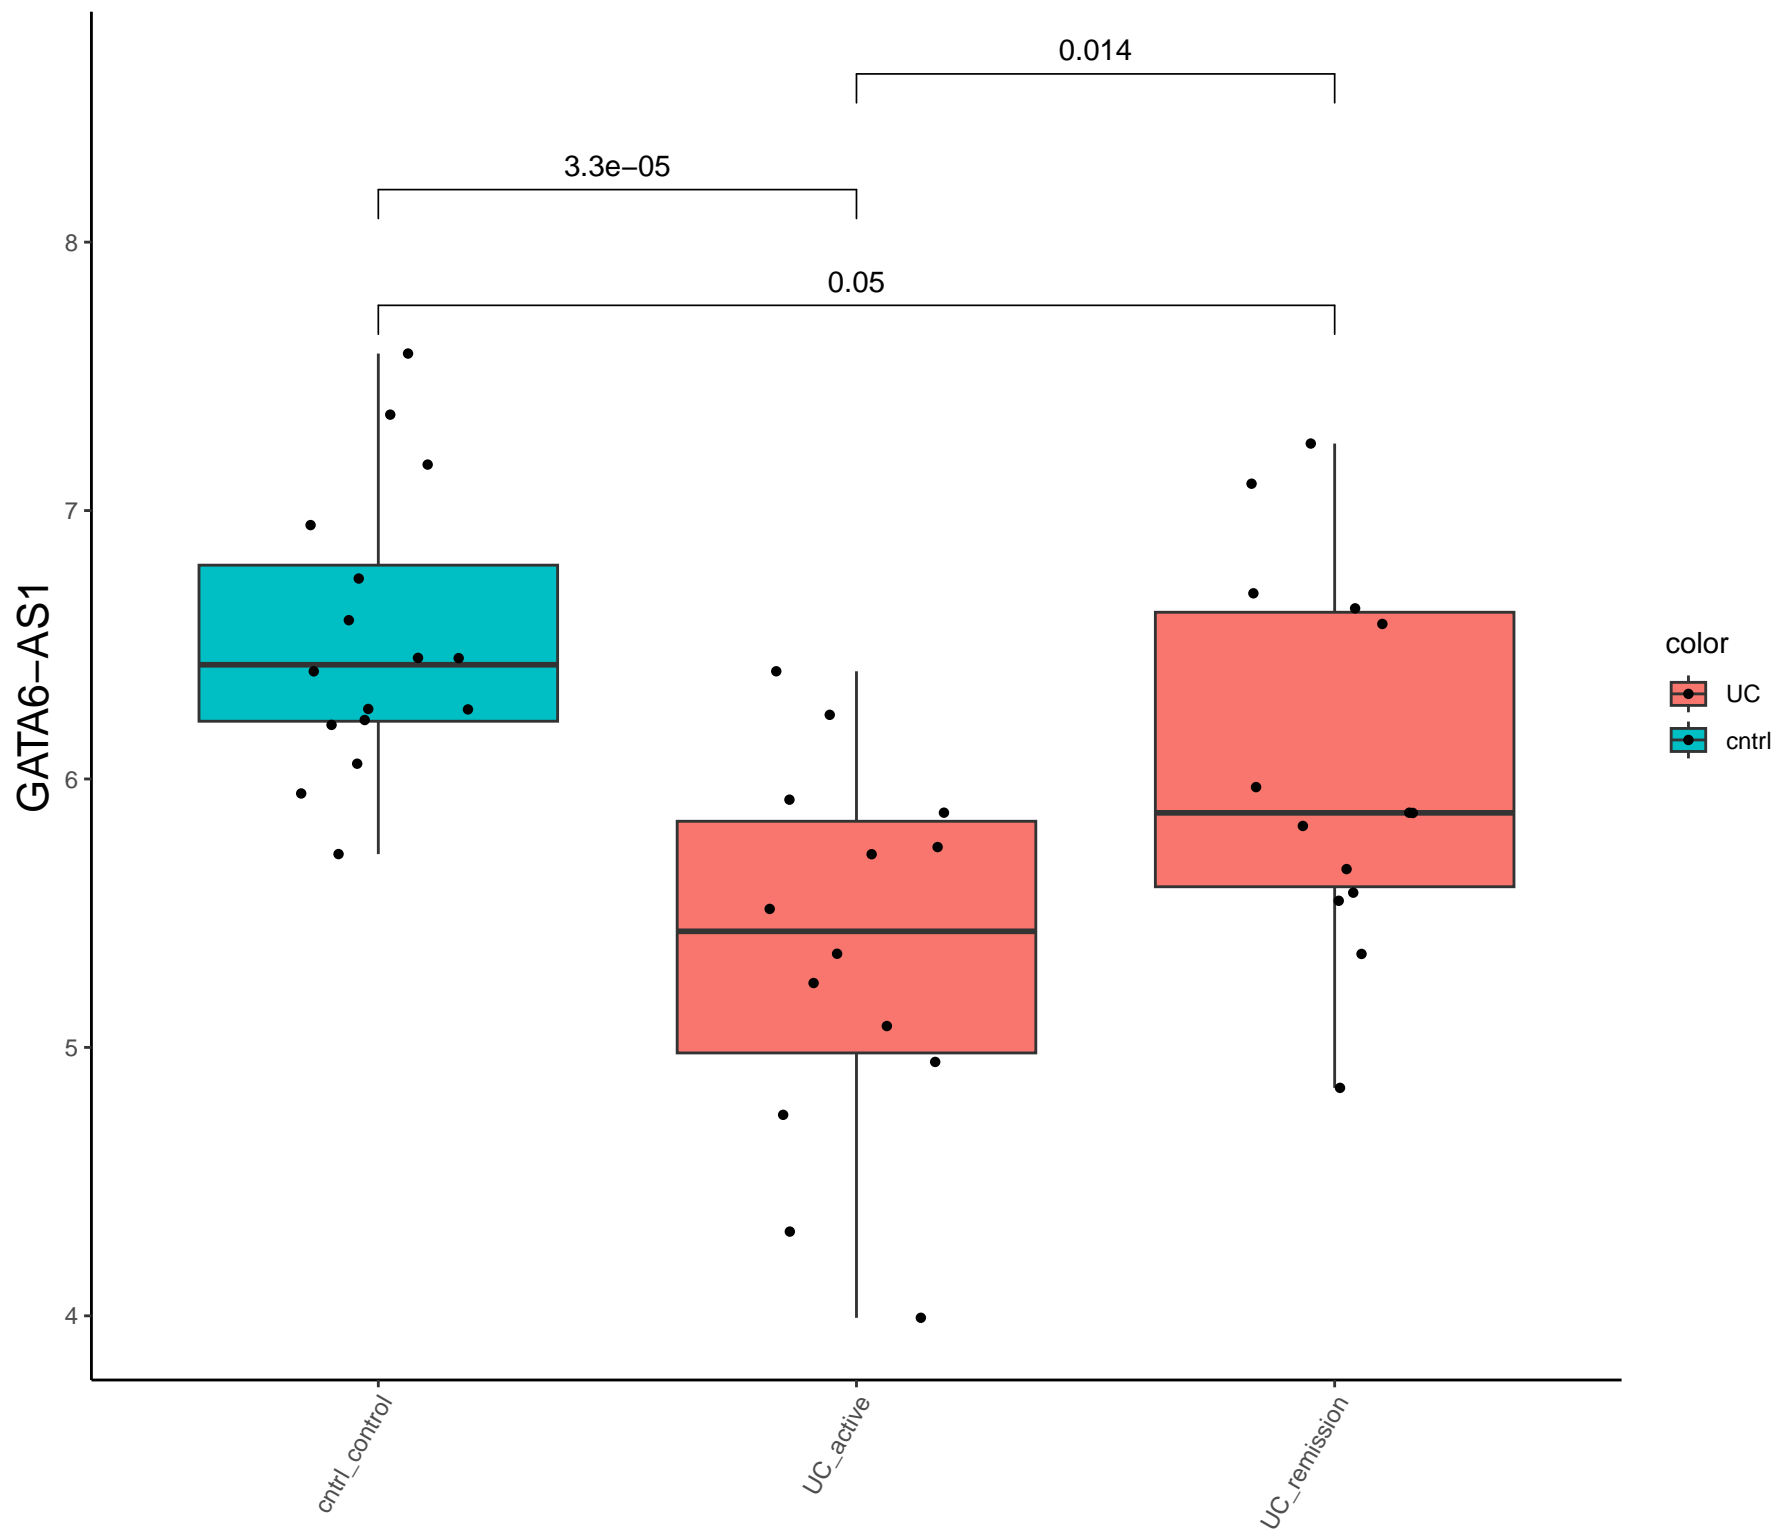

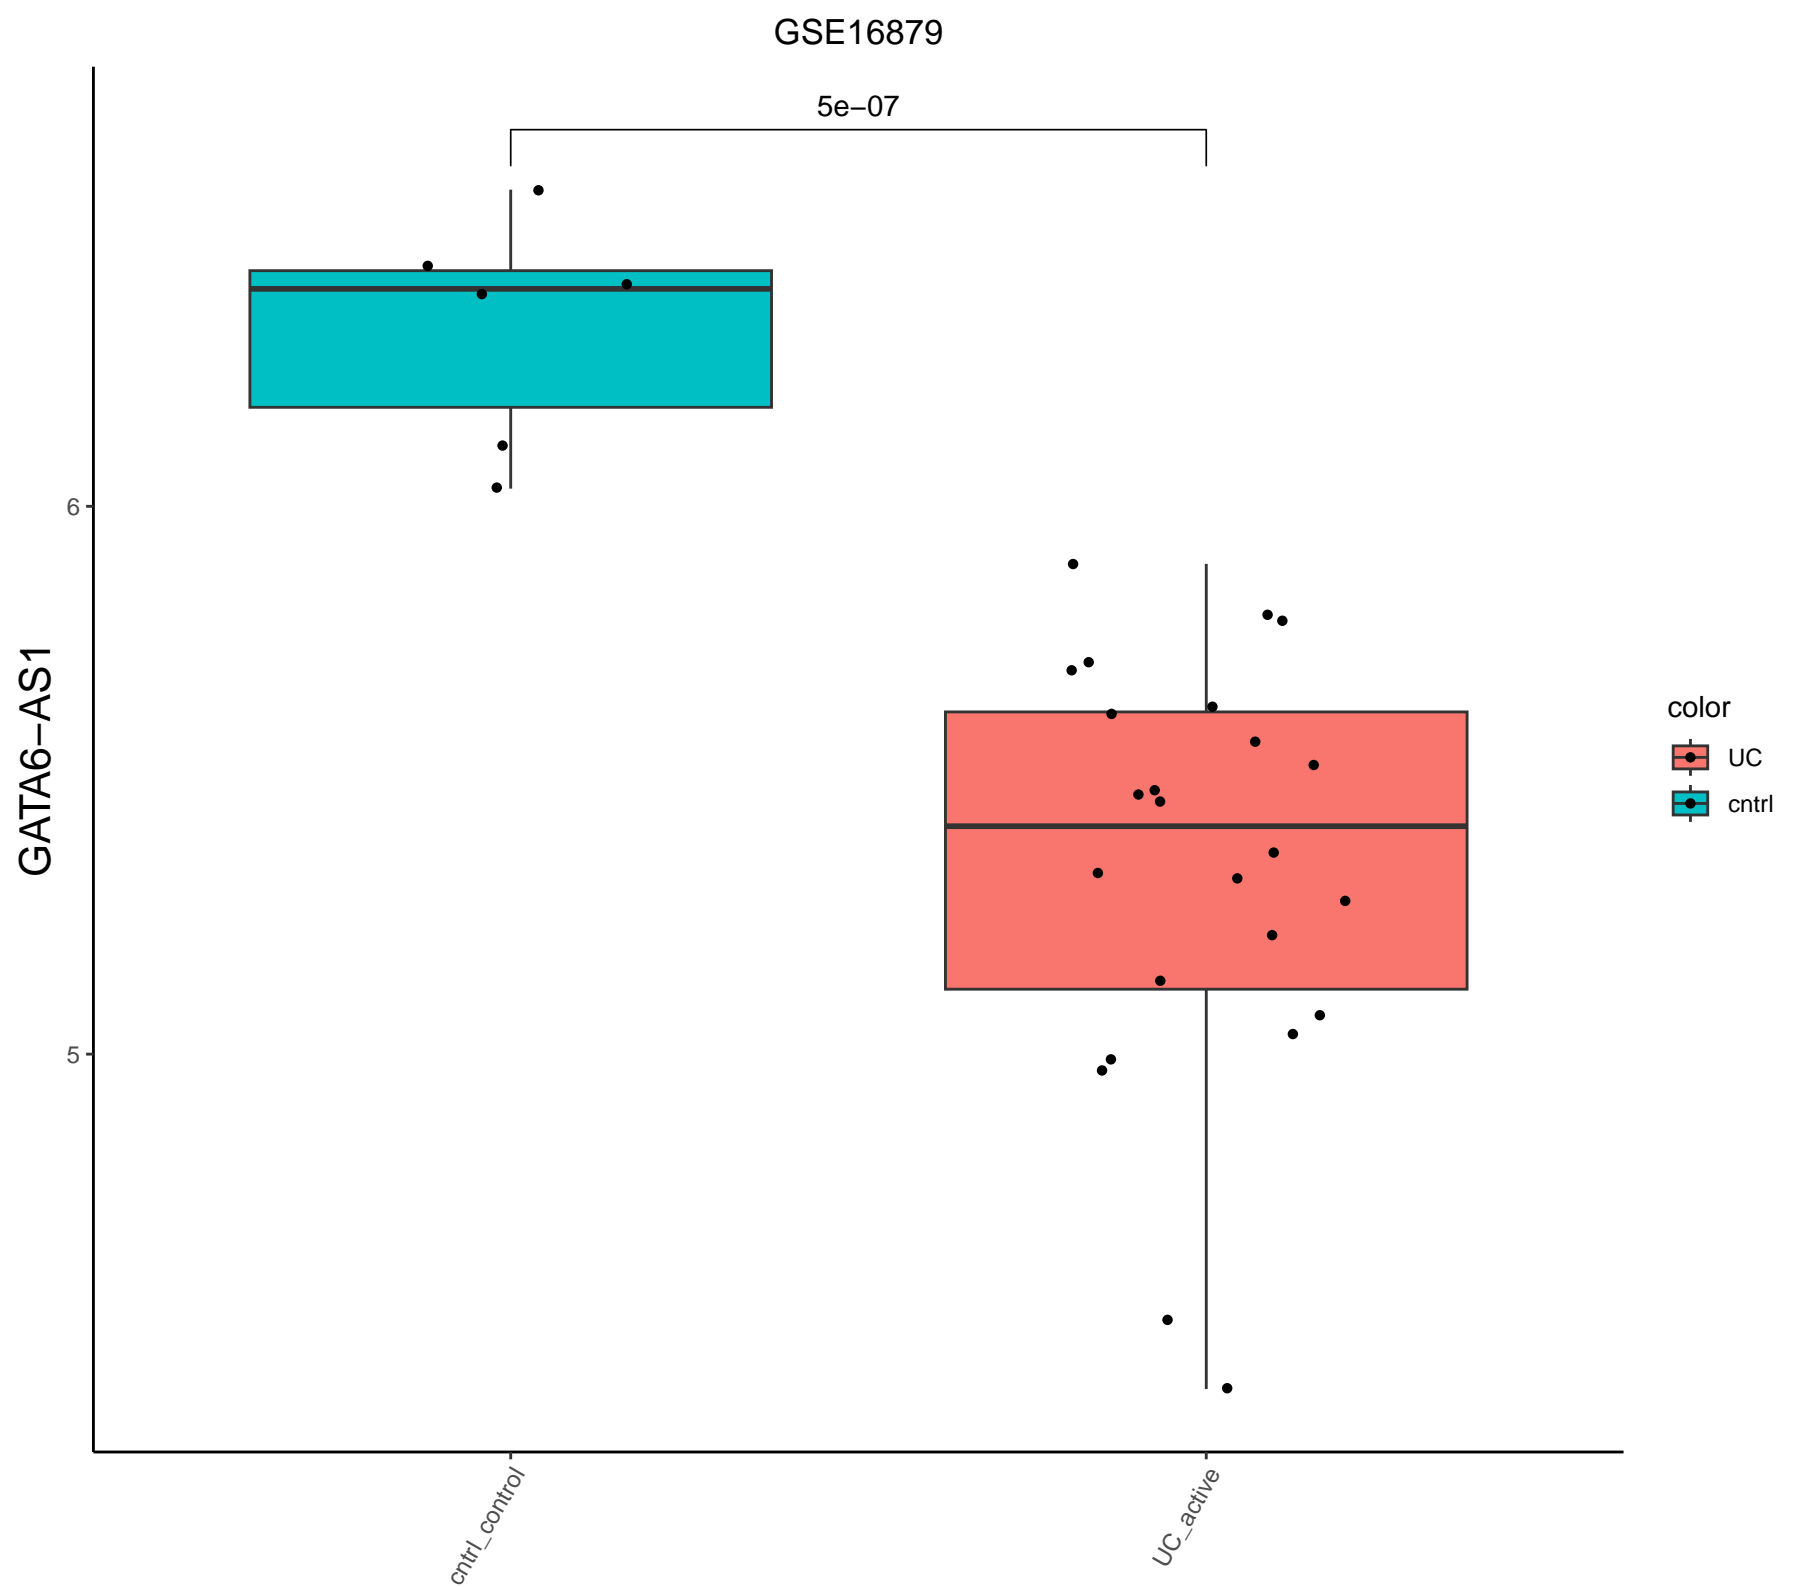

GSE206285

GATA6-AS1

$6.4 \times 10^{-13}$

cntrl\_control

UC\_active

color

UC

cntrl

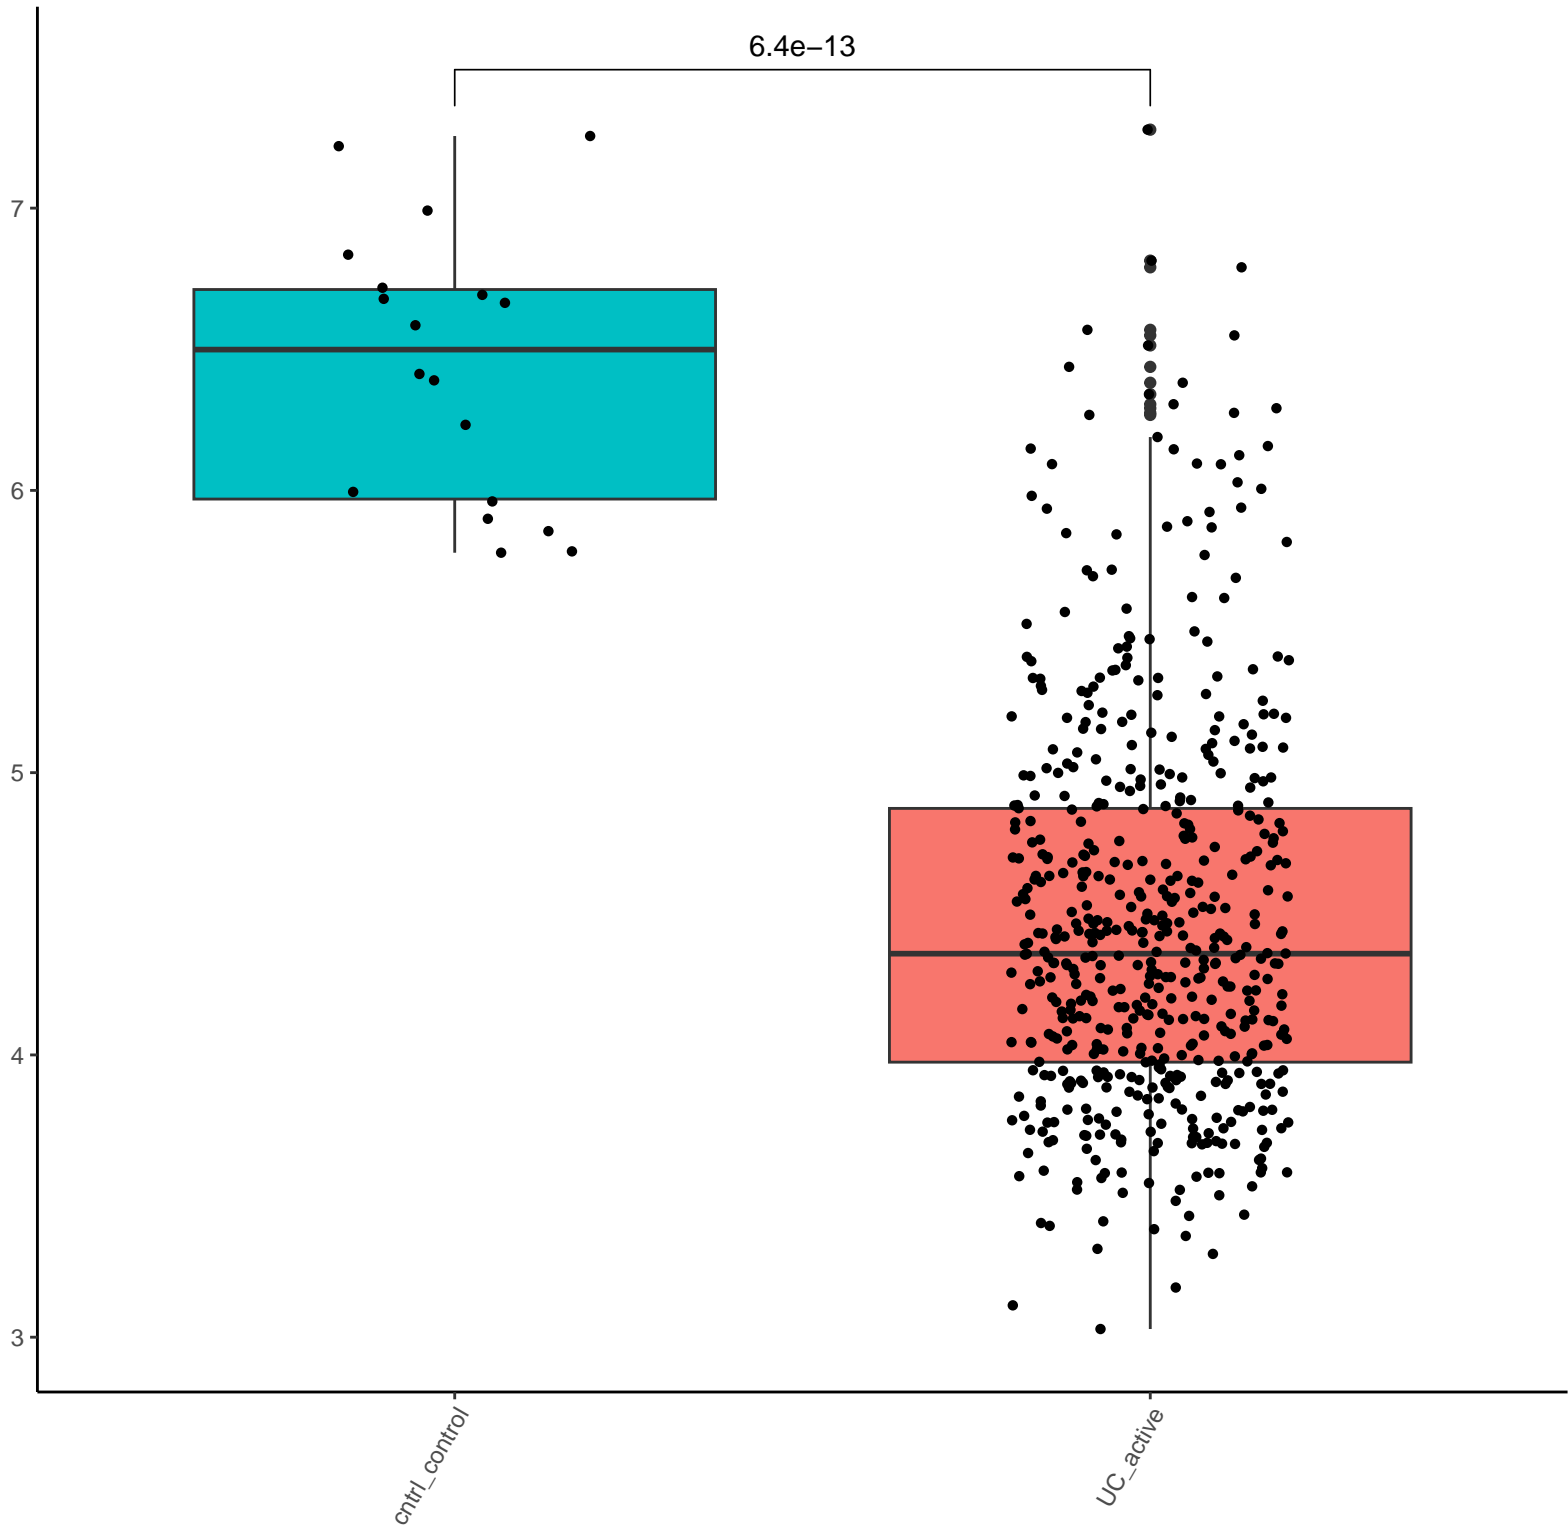

GSE47908

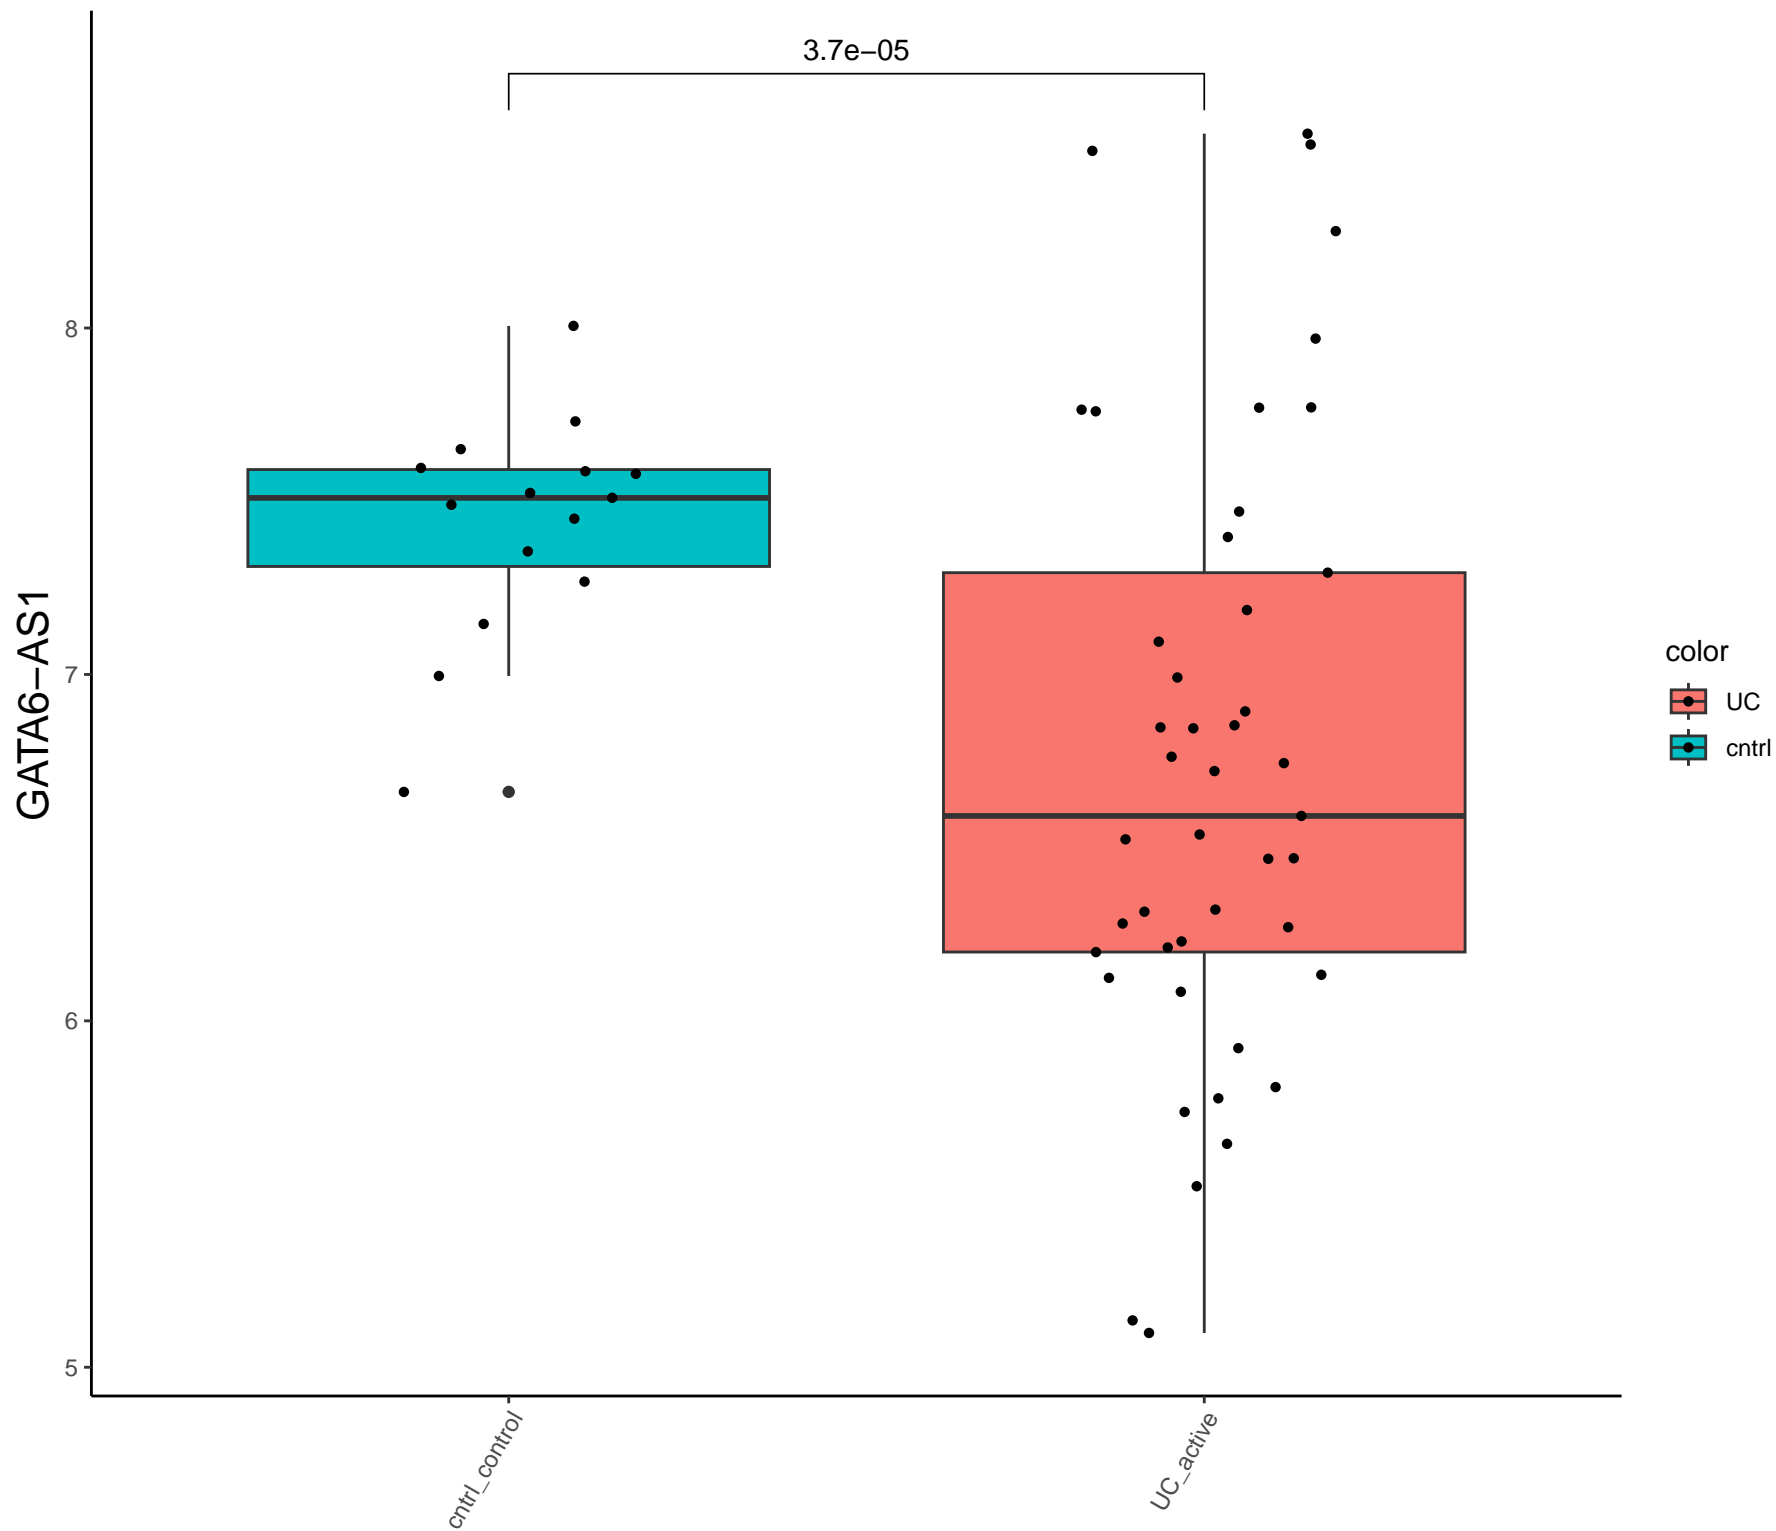

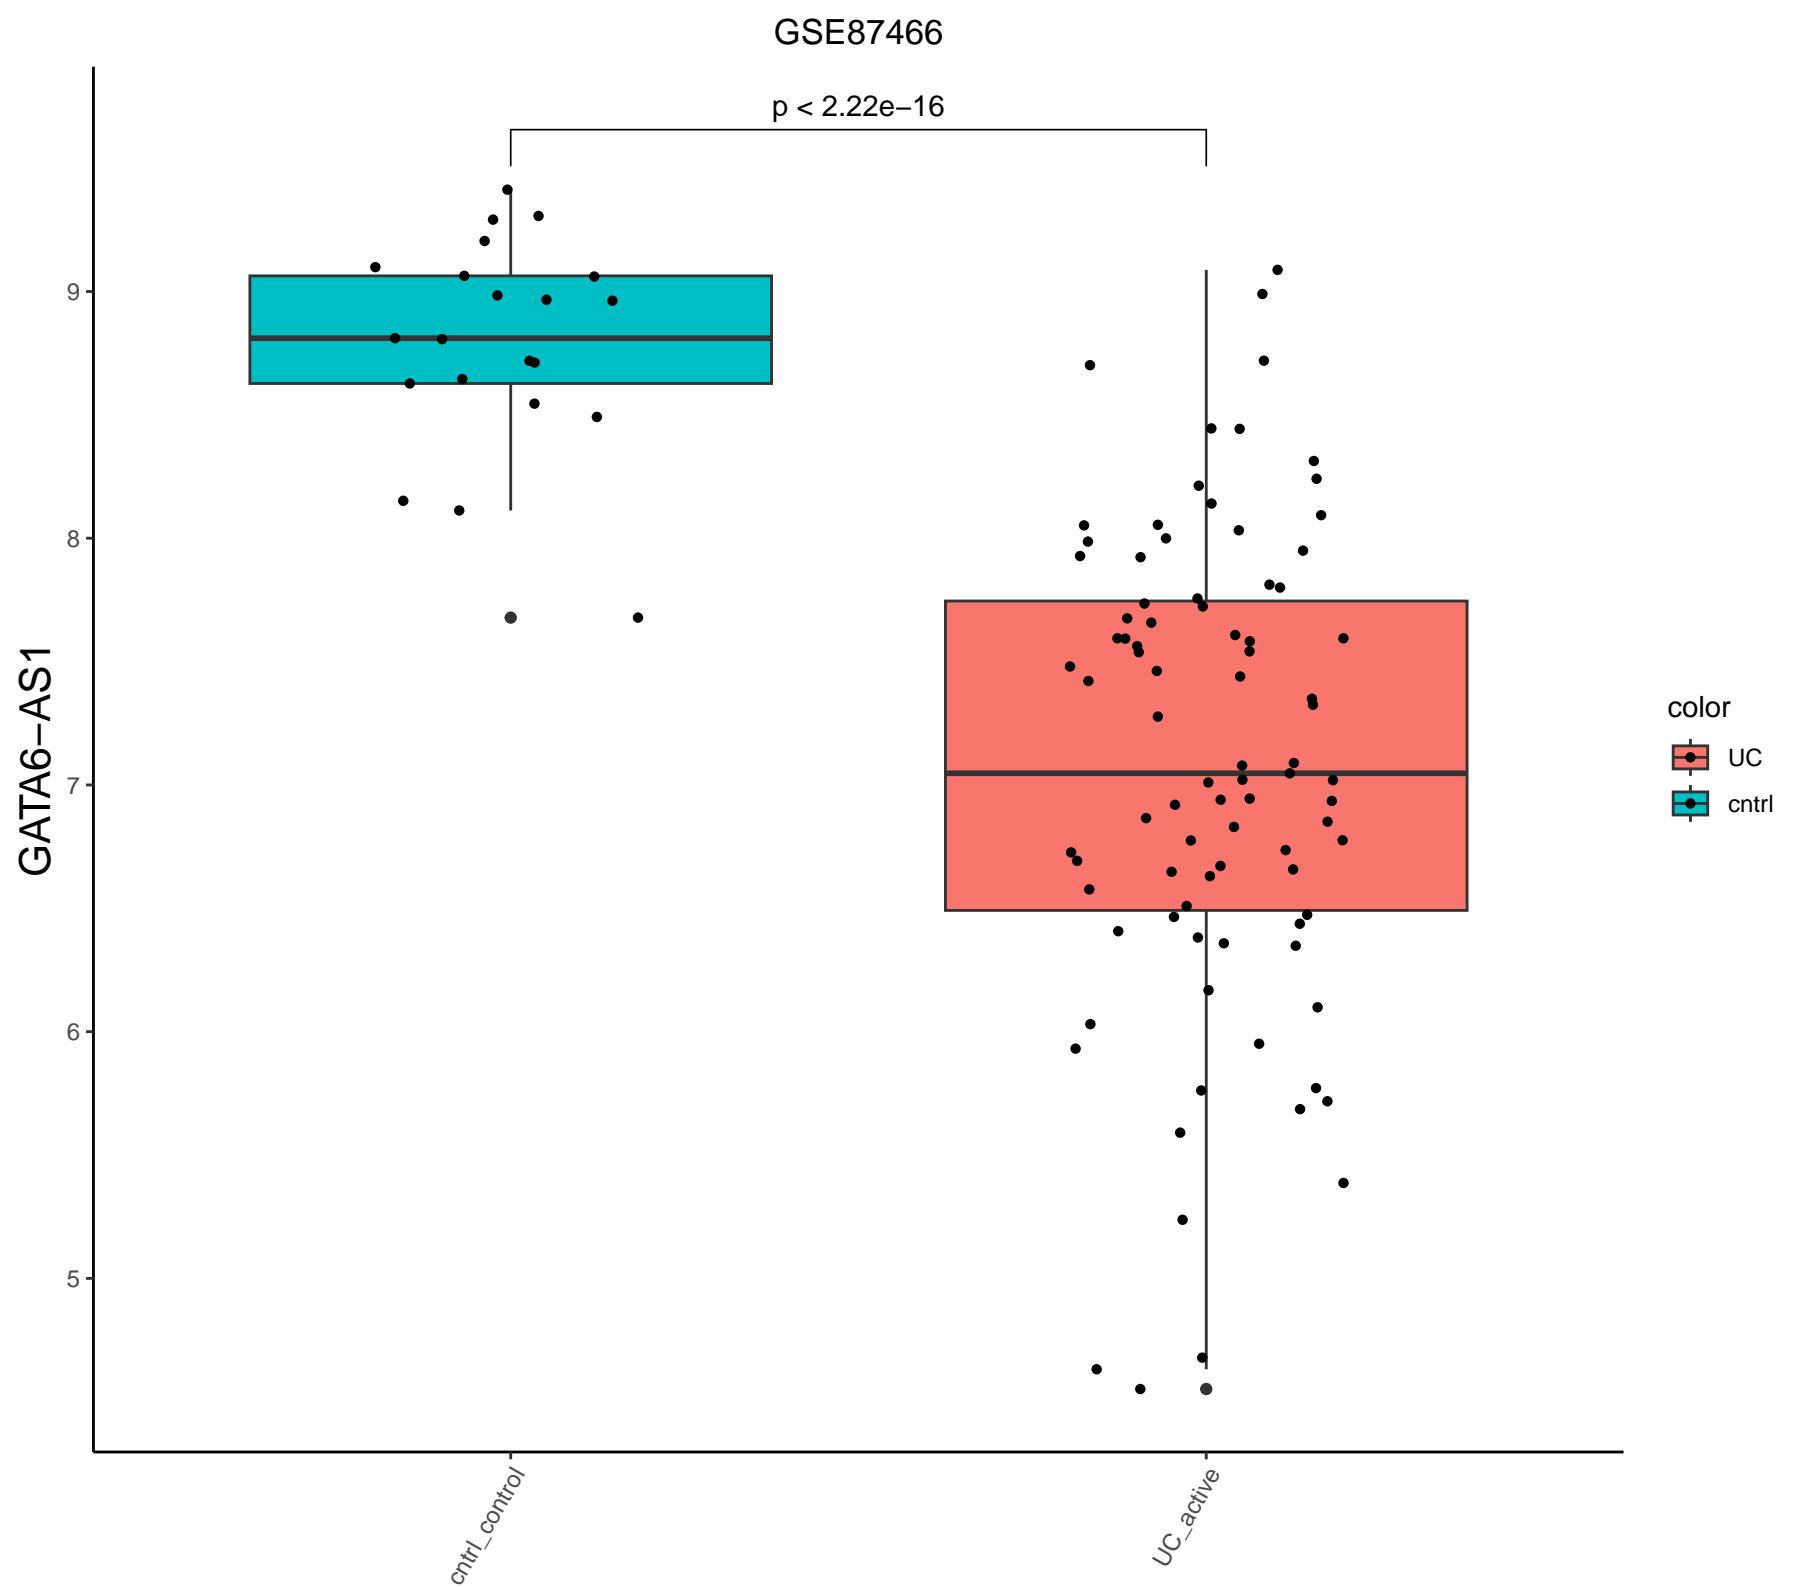

GSE109142

LINC01215

$4e-07$

color

UC

cntrl

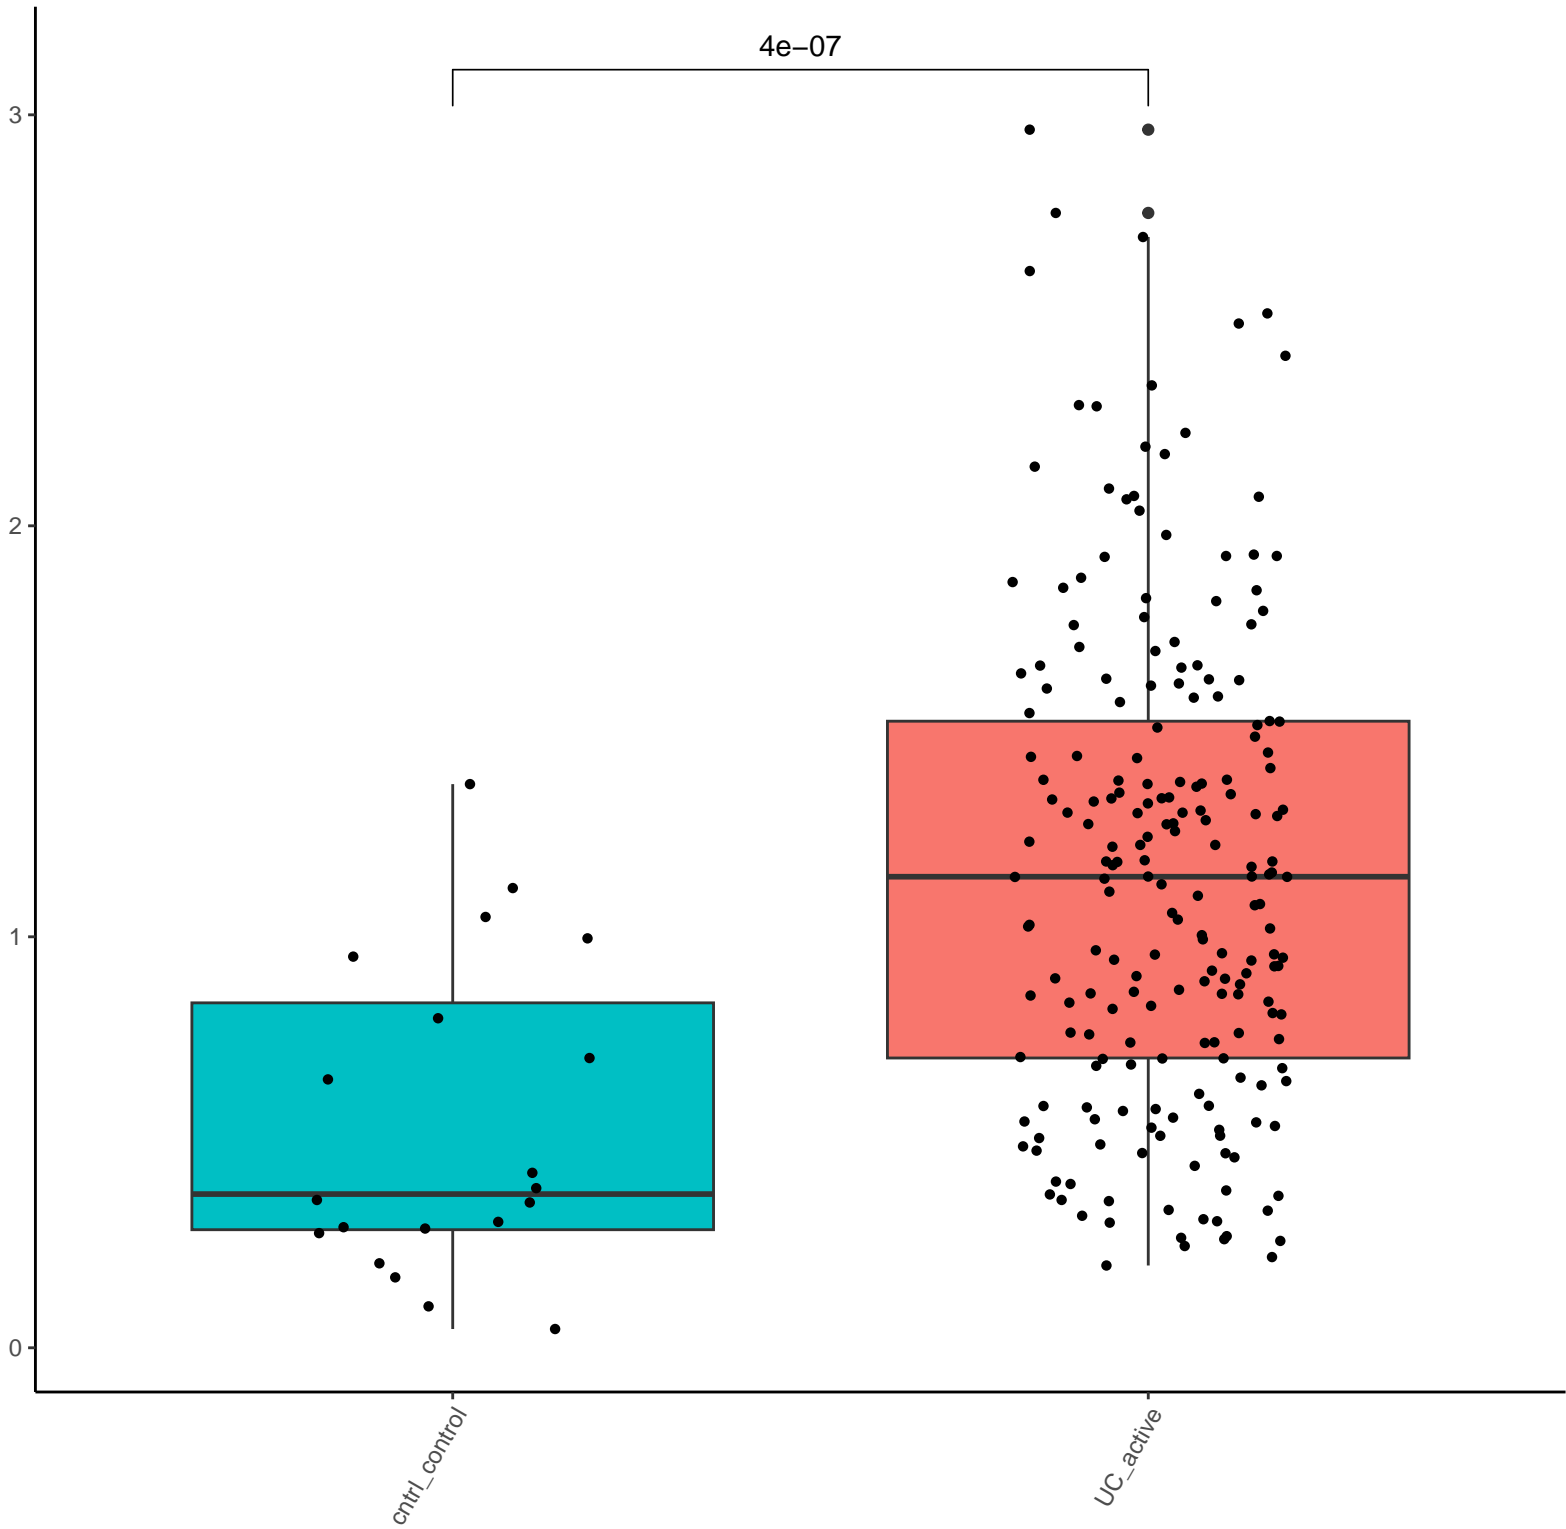



GSE128682

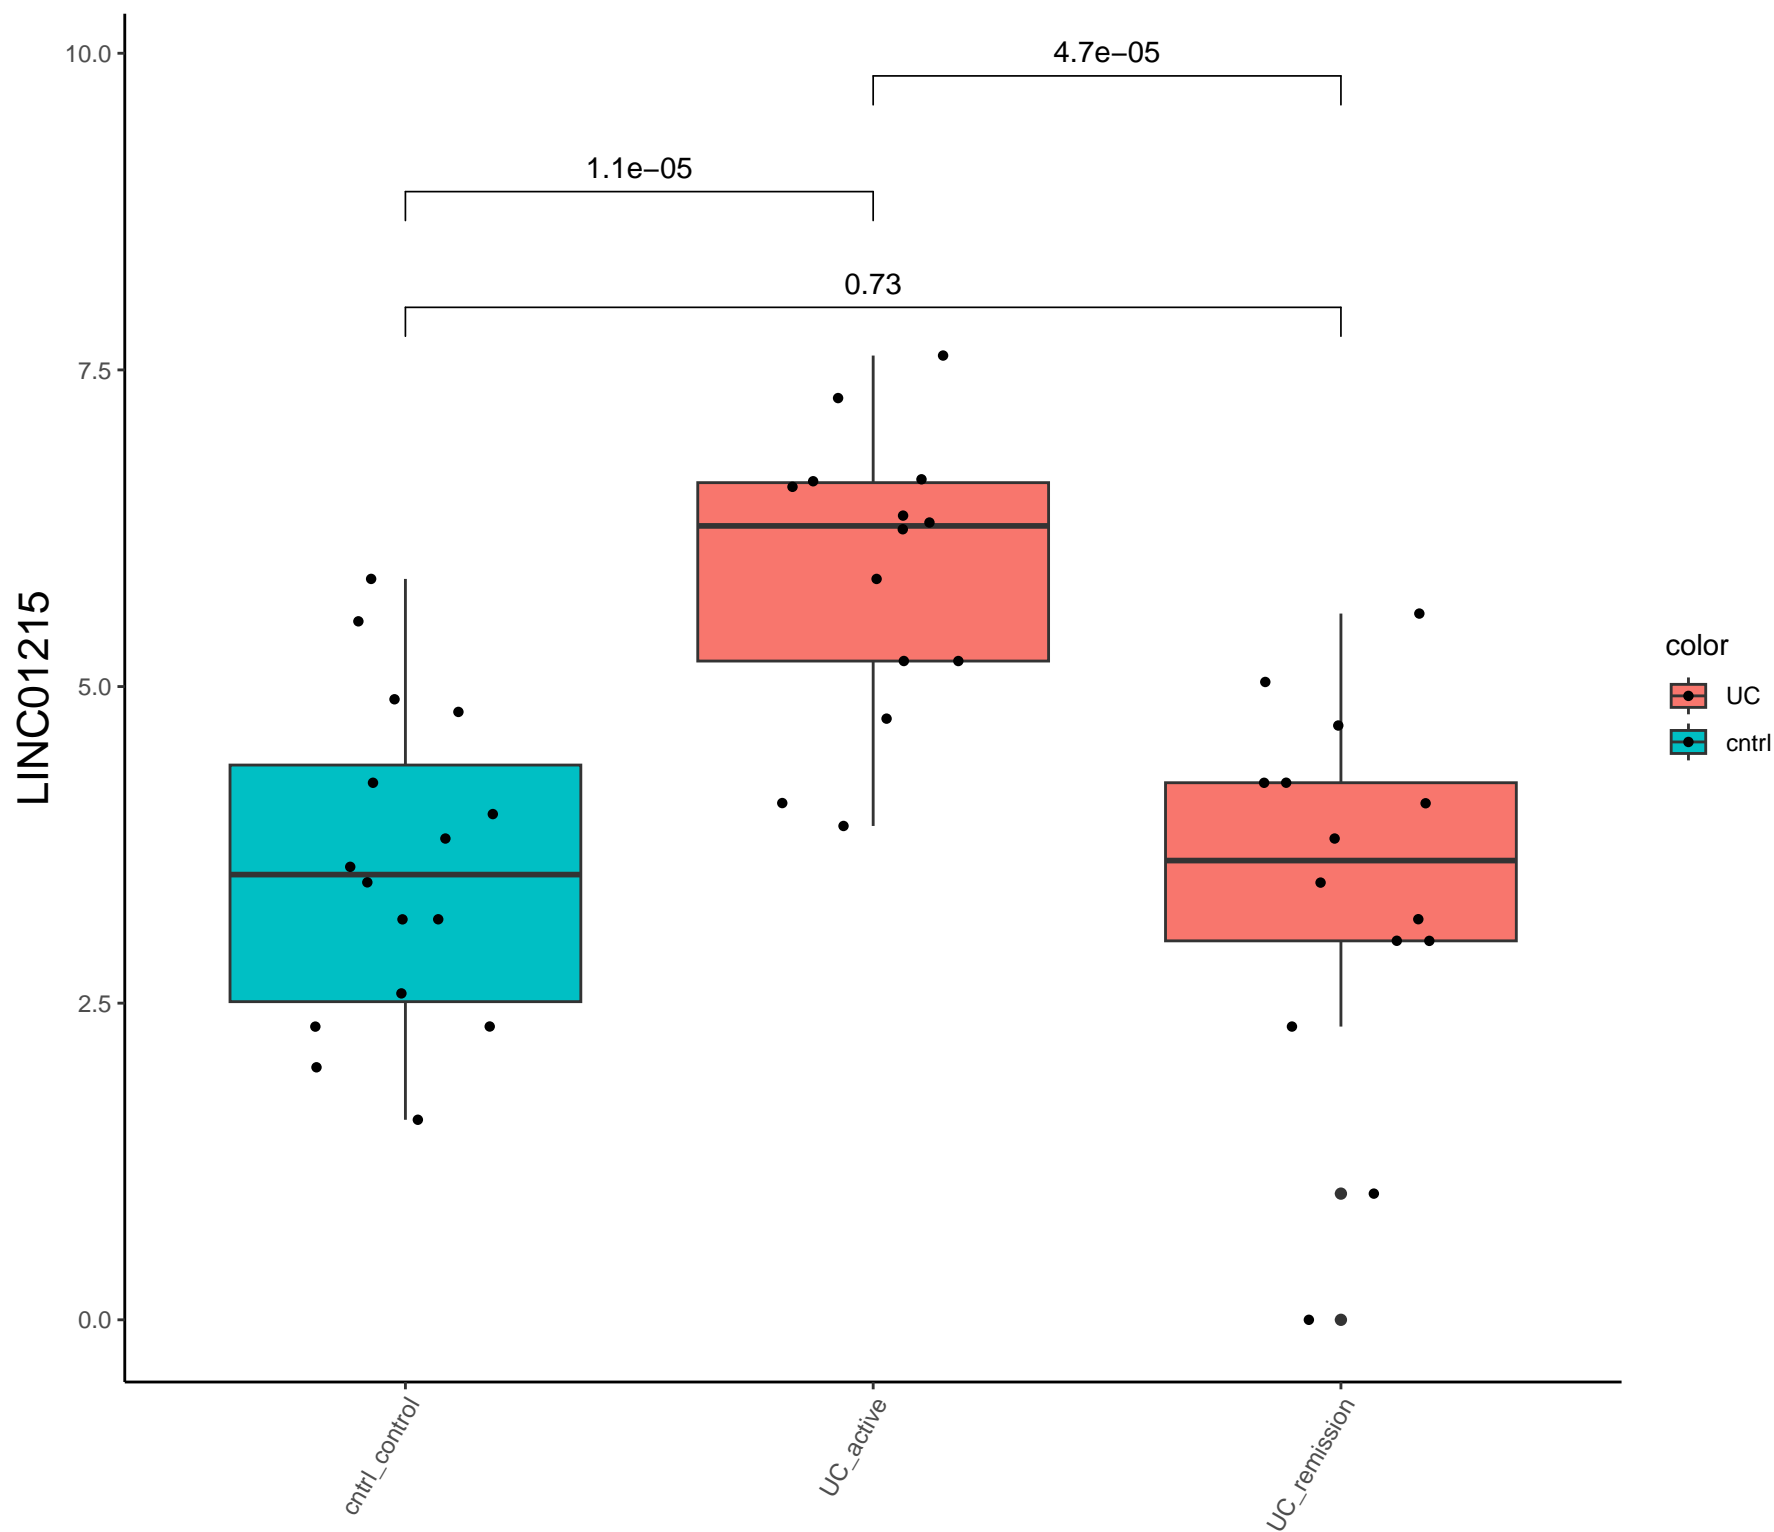

0.00018

cntrl\_control

UC\_active



UC

cntrl

GSE206285

LINC01215

0.99

color  
UC  
cntrl

cntrl\_control

UC\_active

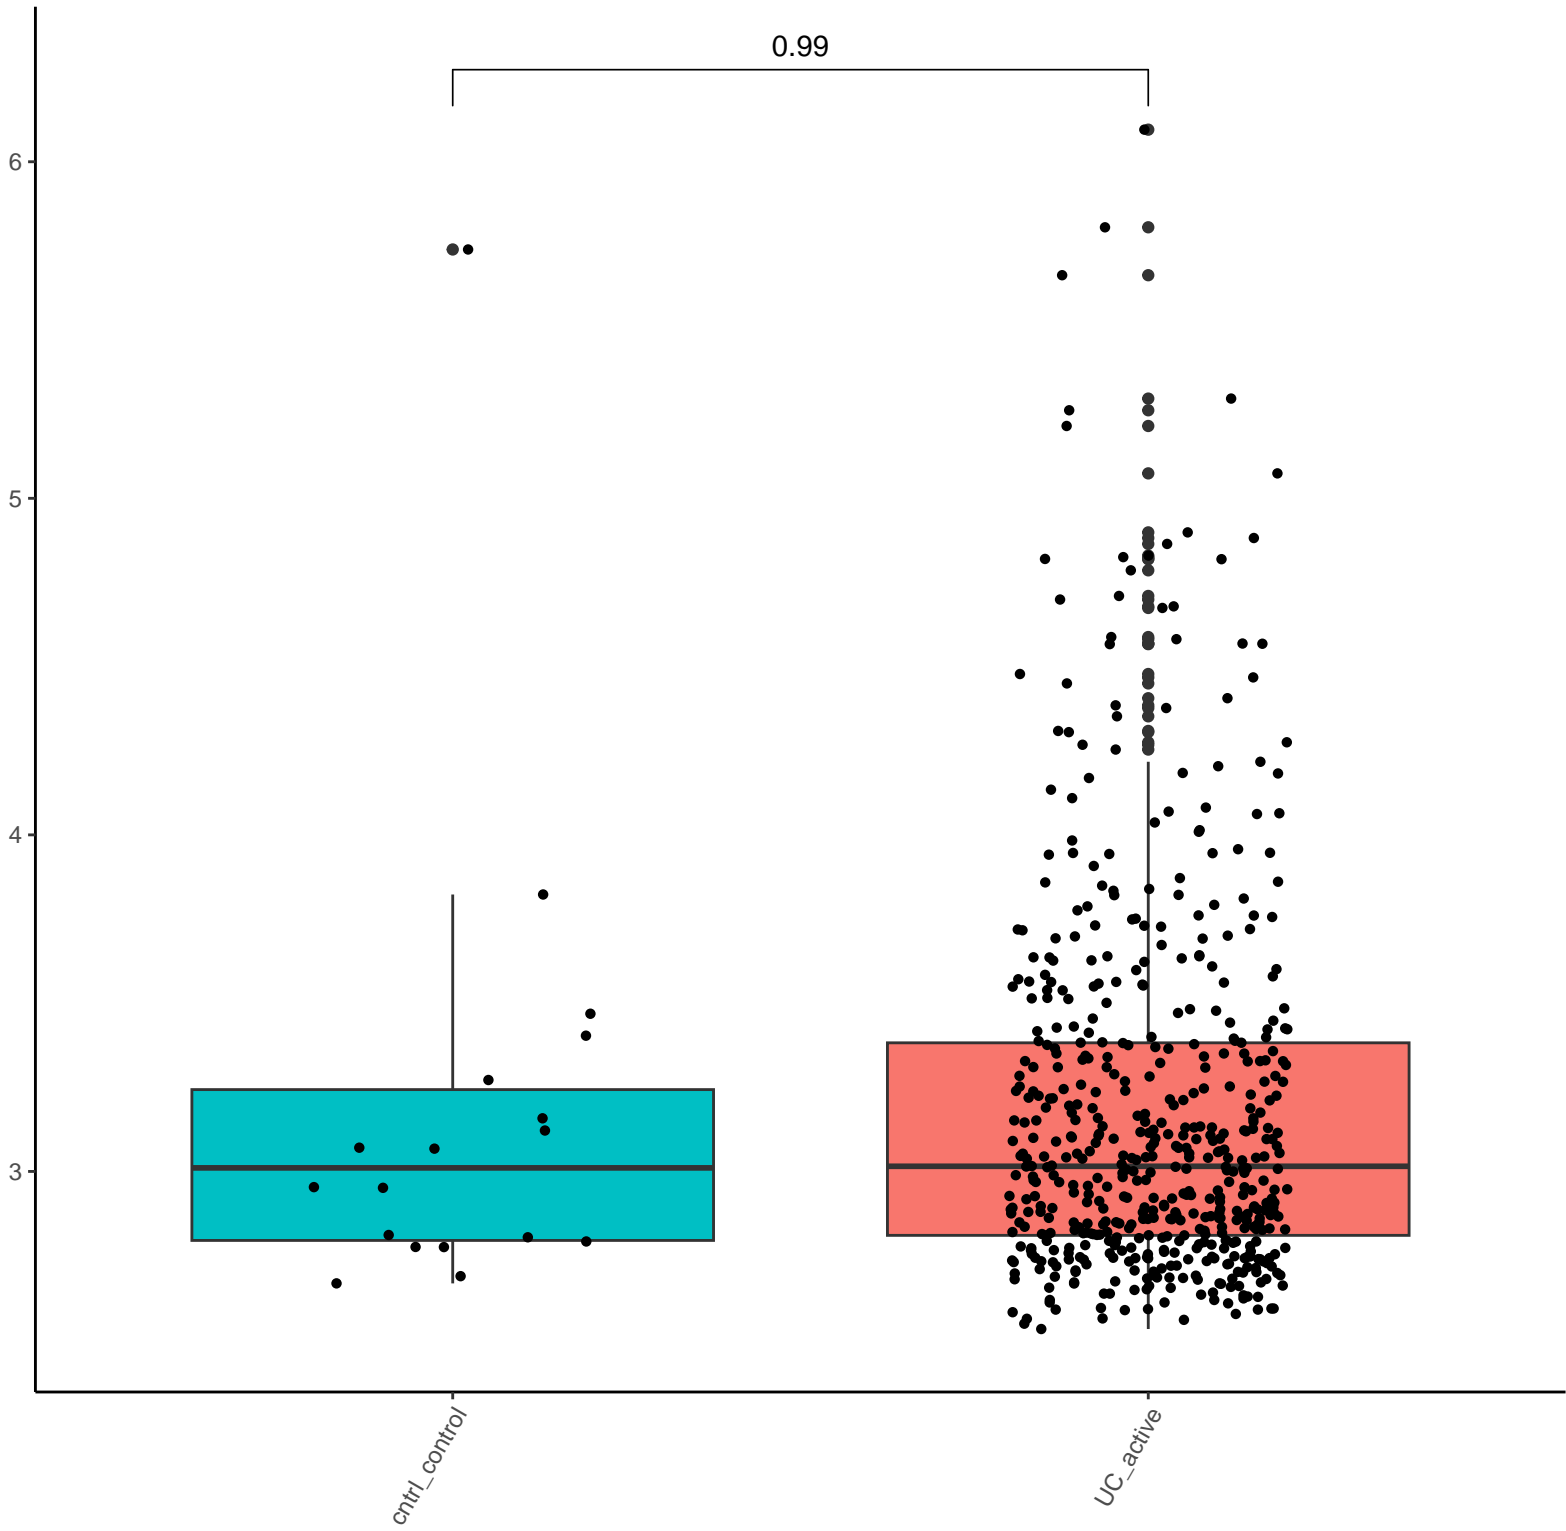

GSE47908

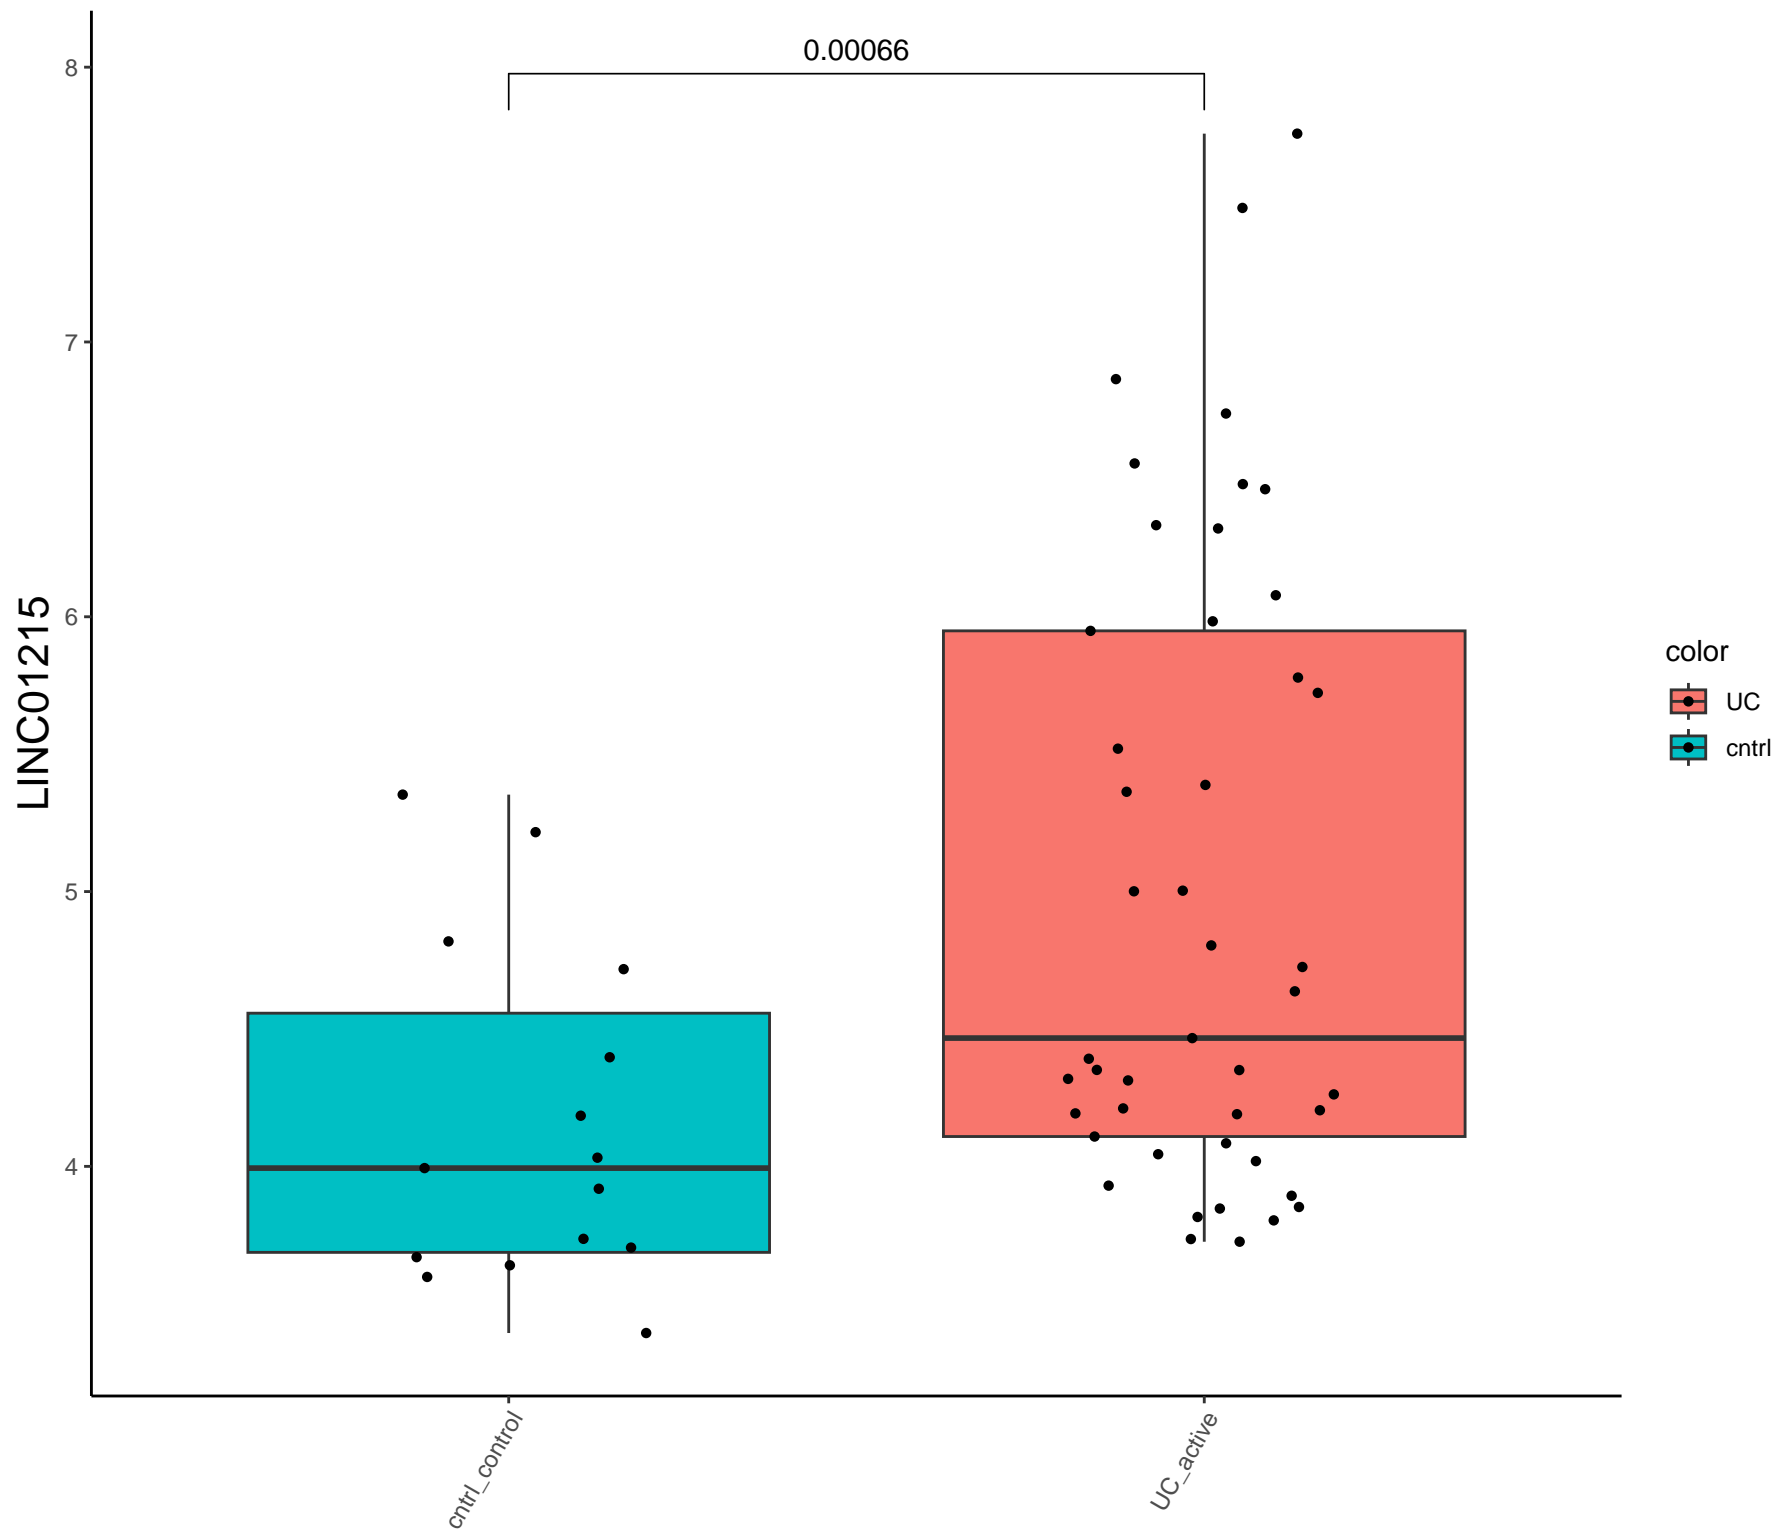

GSE87466

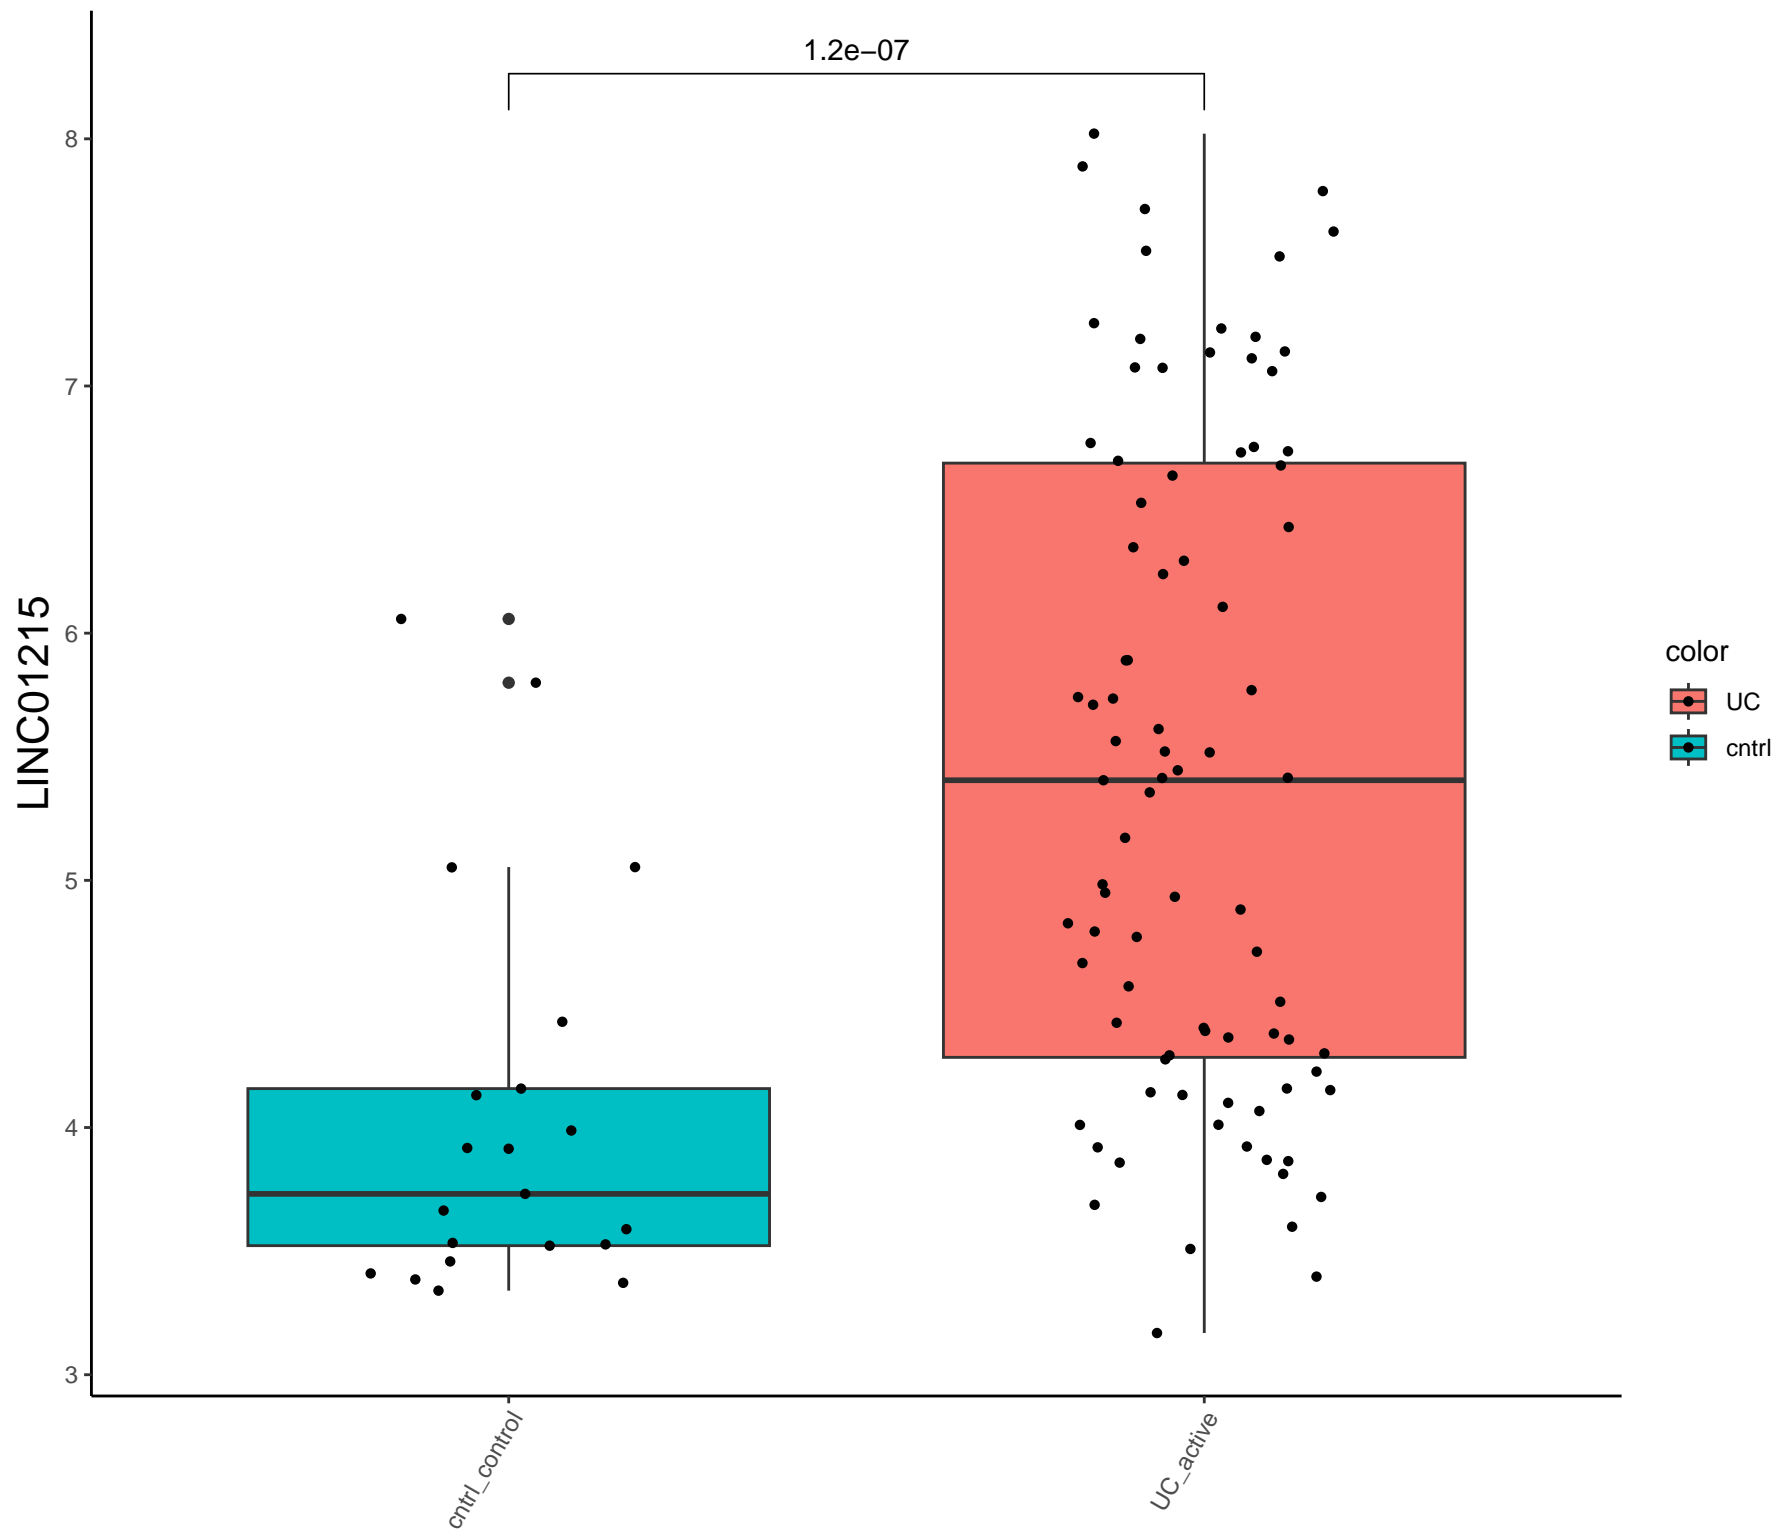

GSE109142

LINC01224

1.5e-08

cntrl\_control

UC\_active

color  
UC  
cntrl

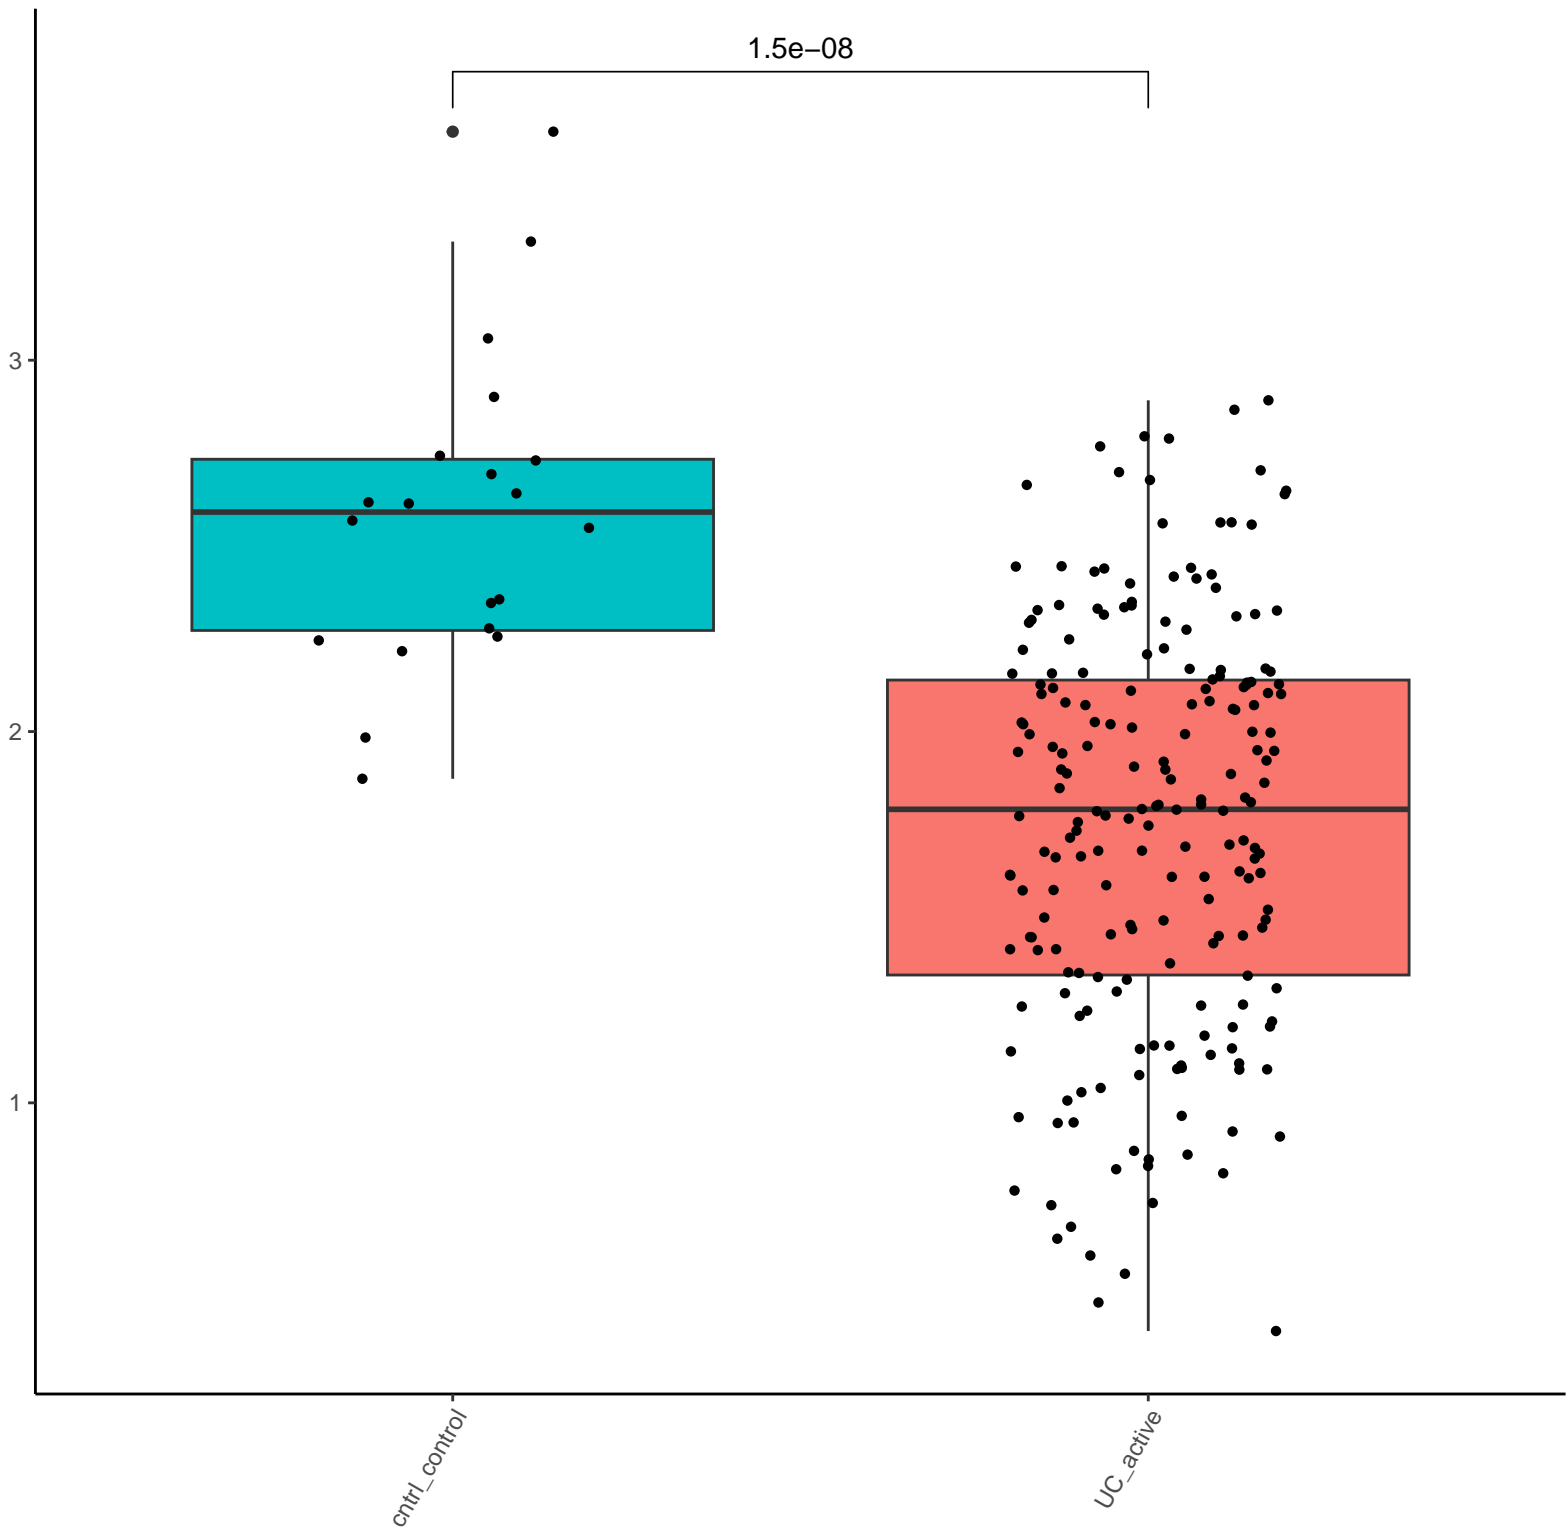

GSE128682

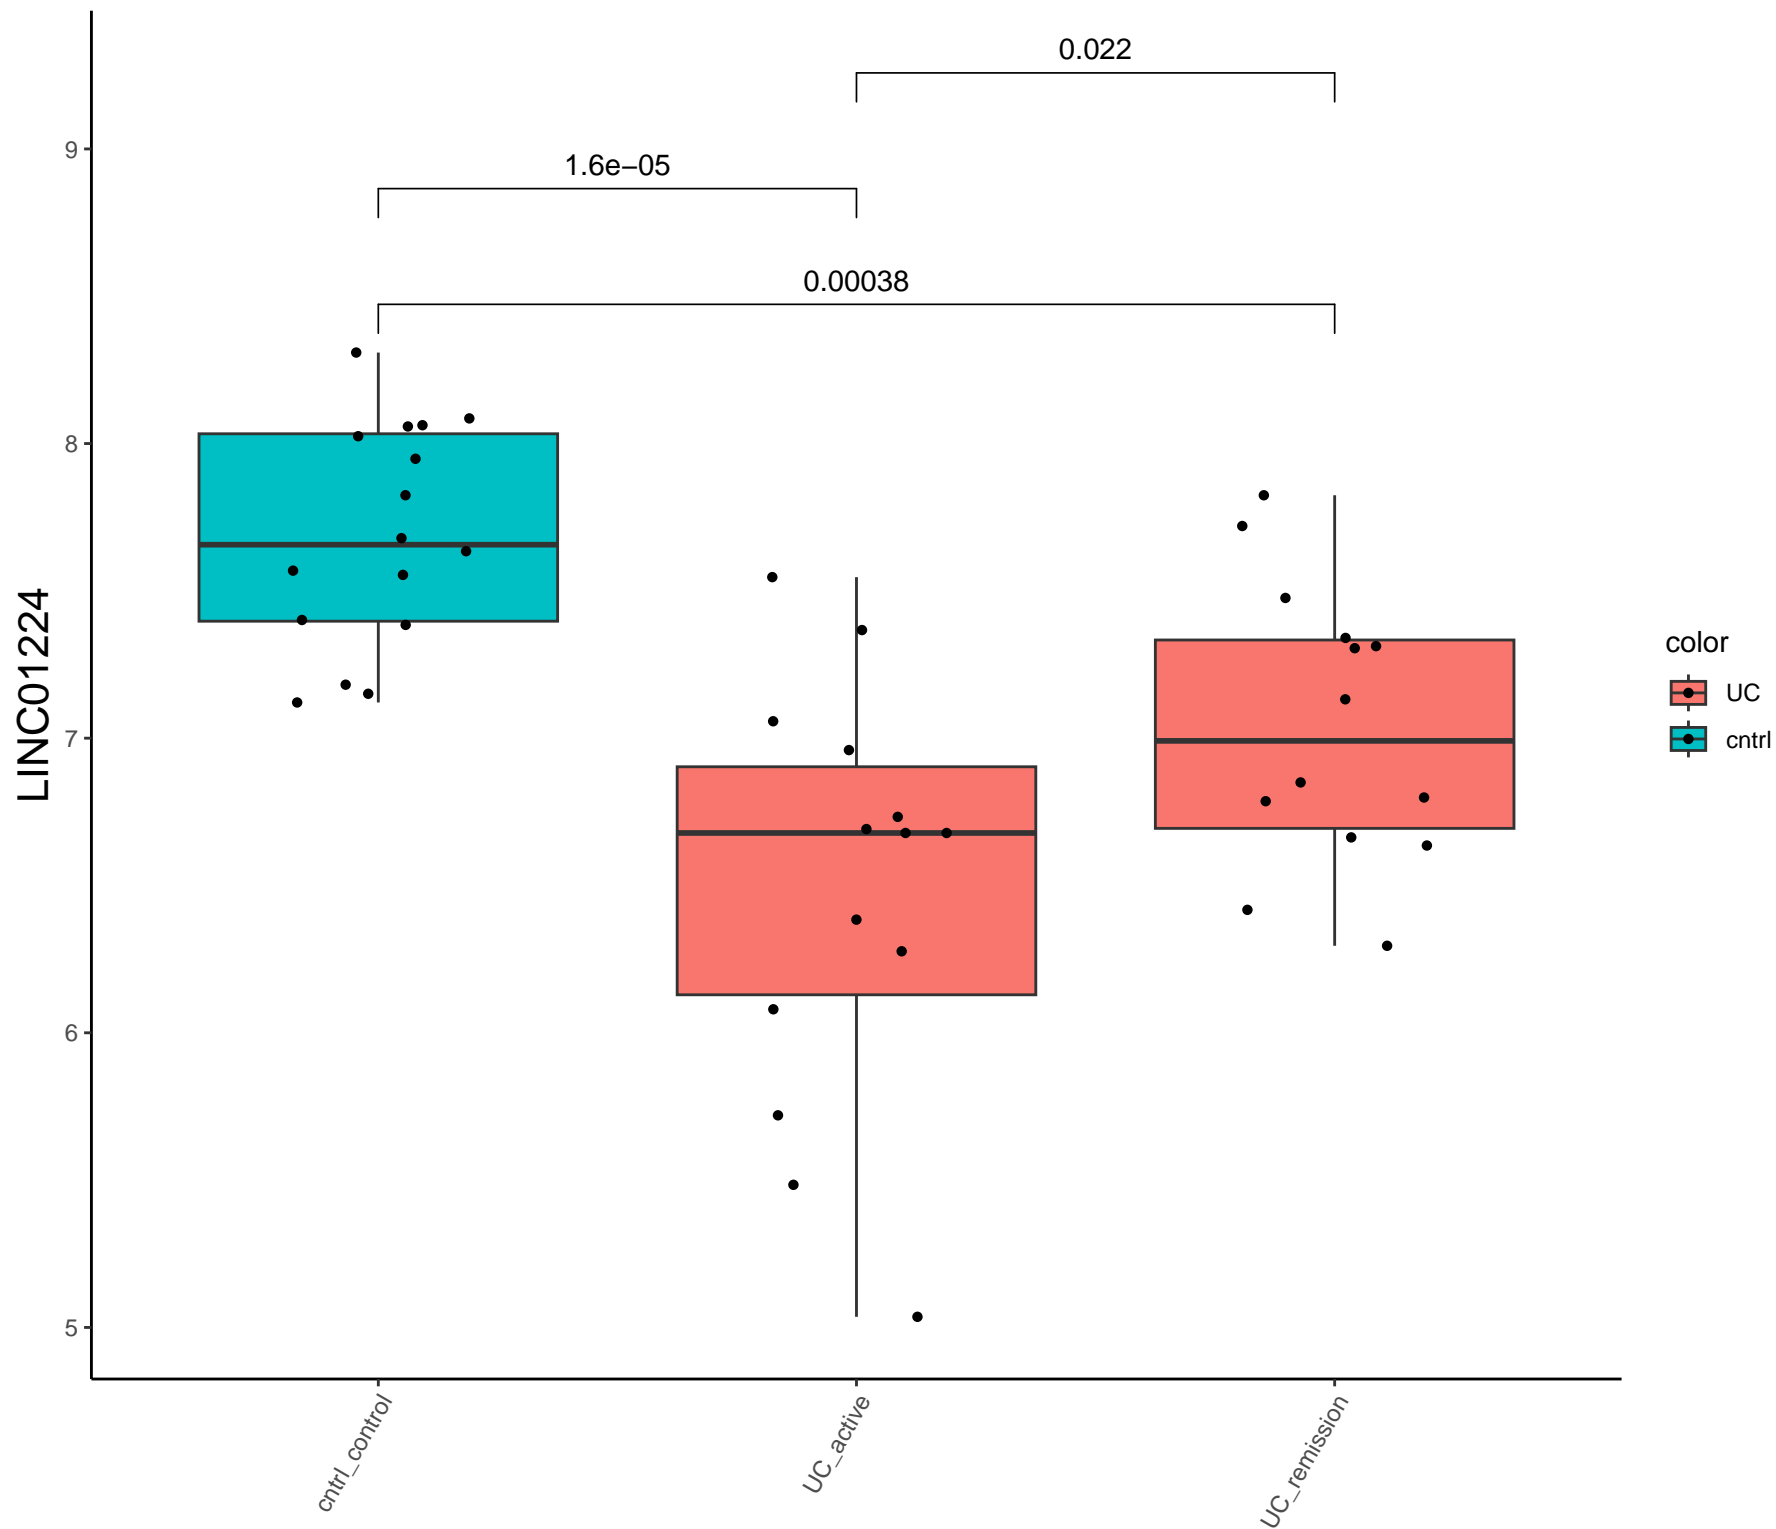

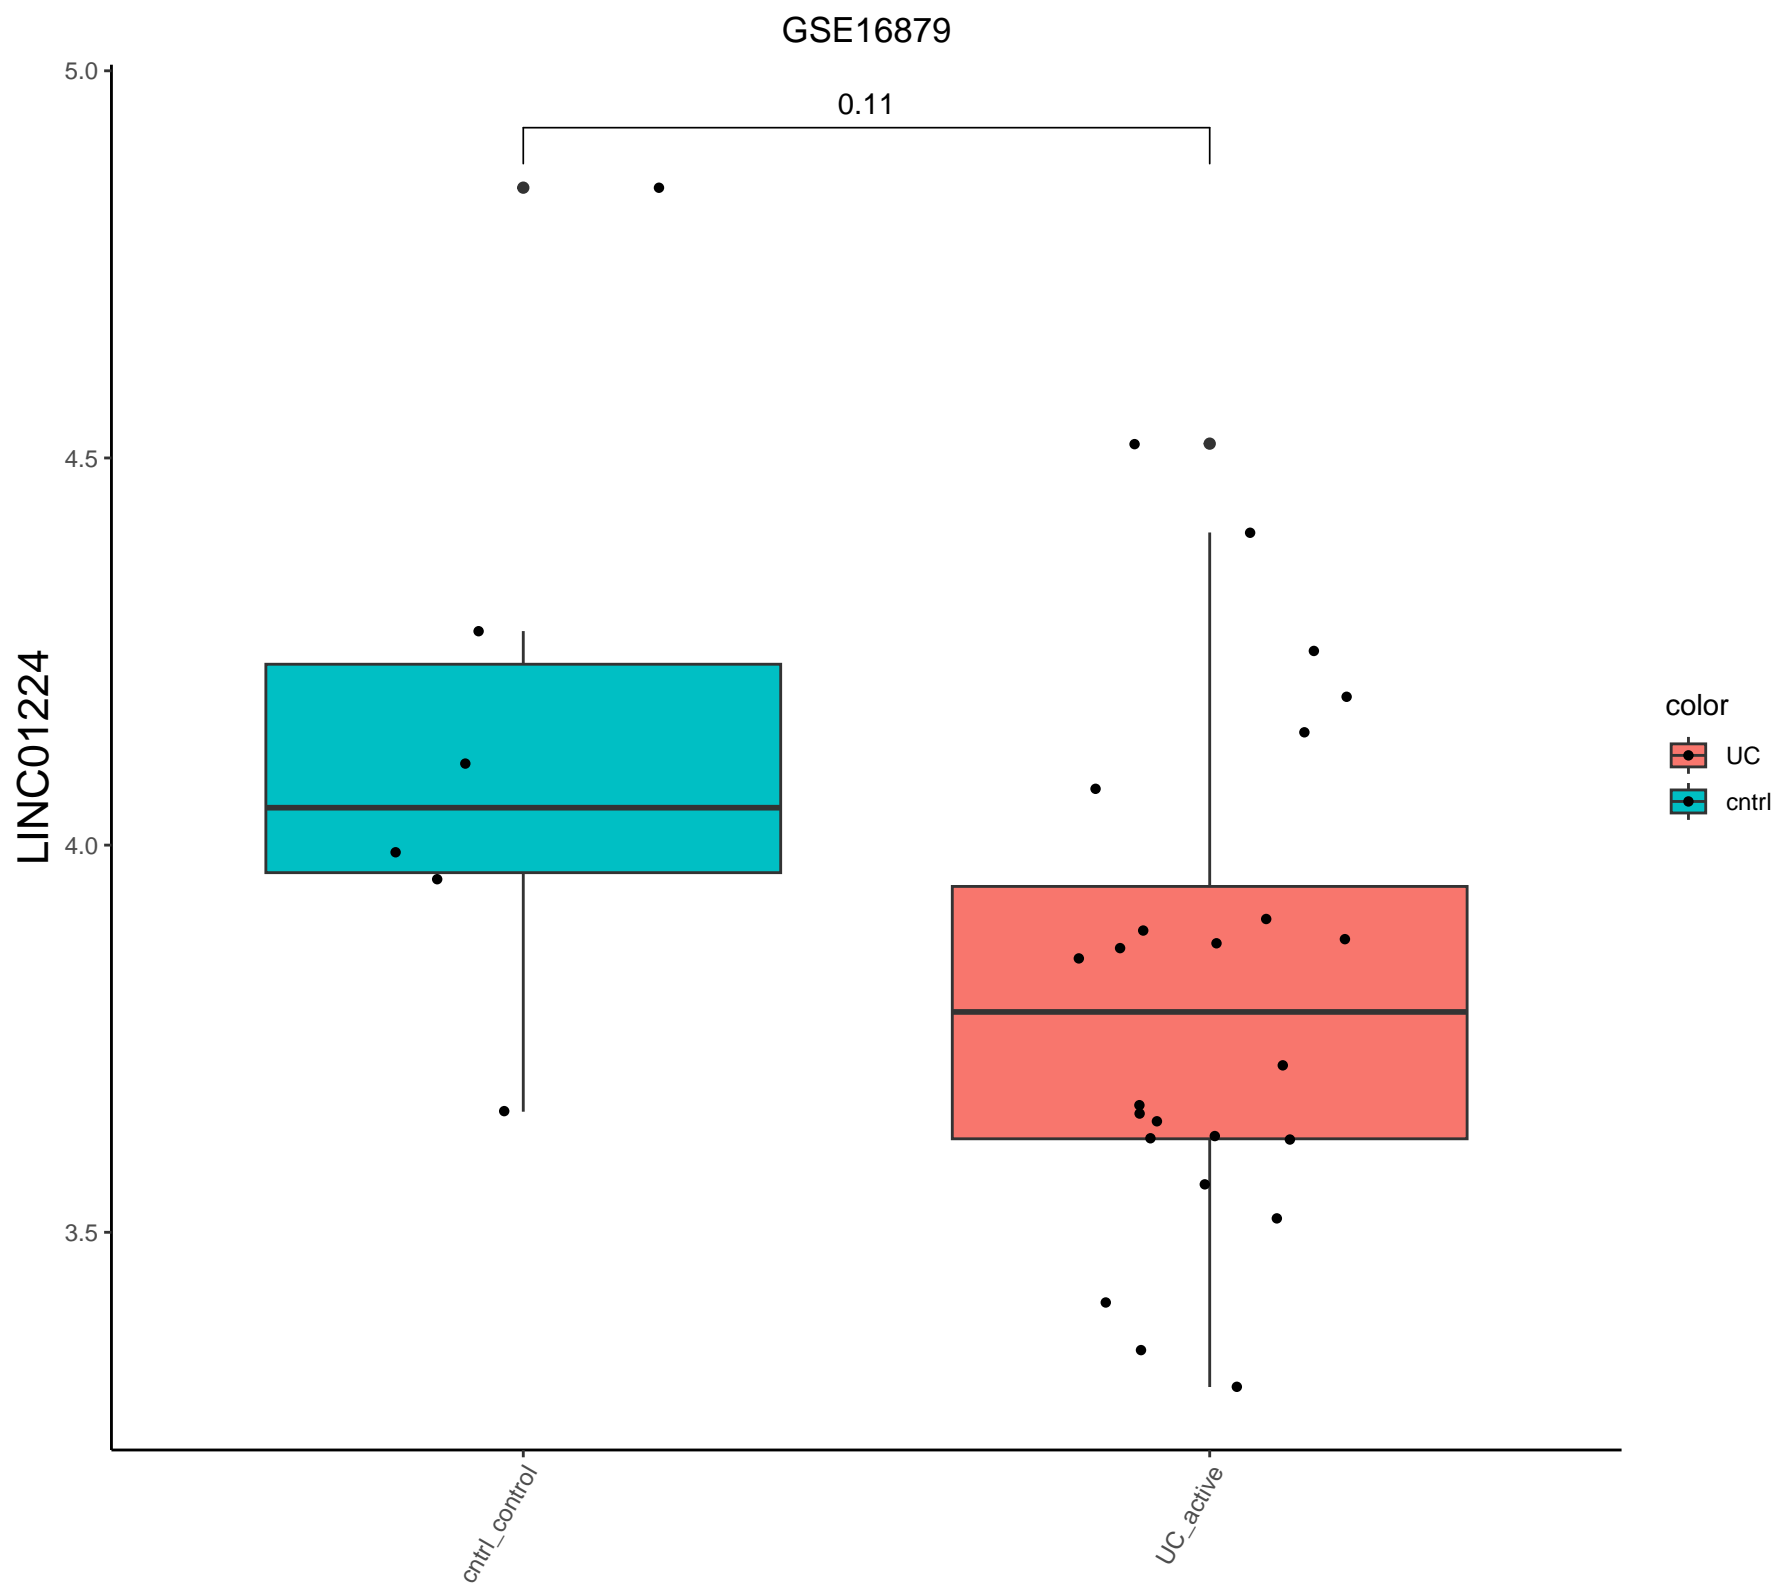



GSE206285

LINC01224

9.7e-09

cntrl\_control

UC\_active

color  
UC  
cntrl

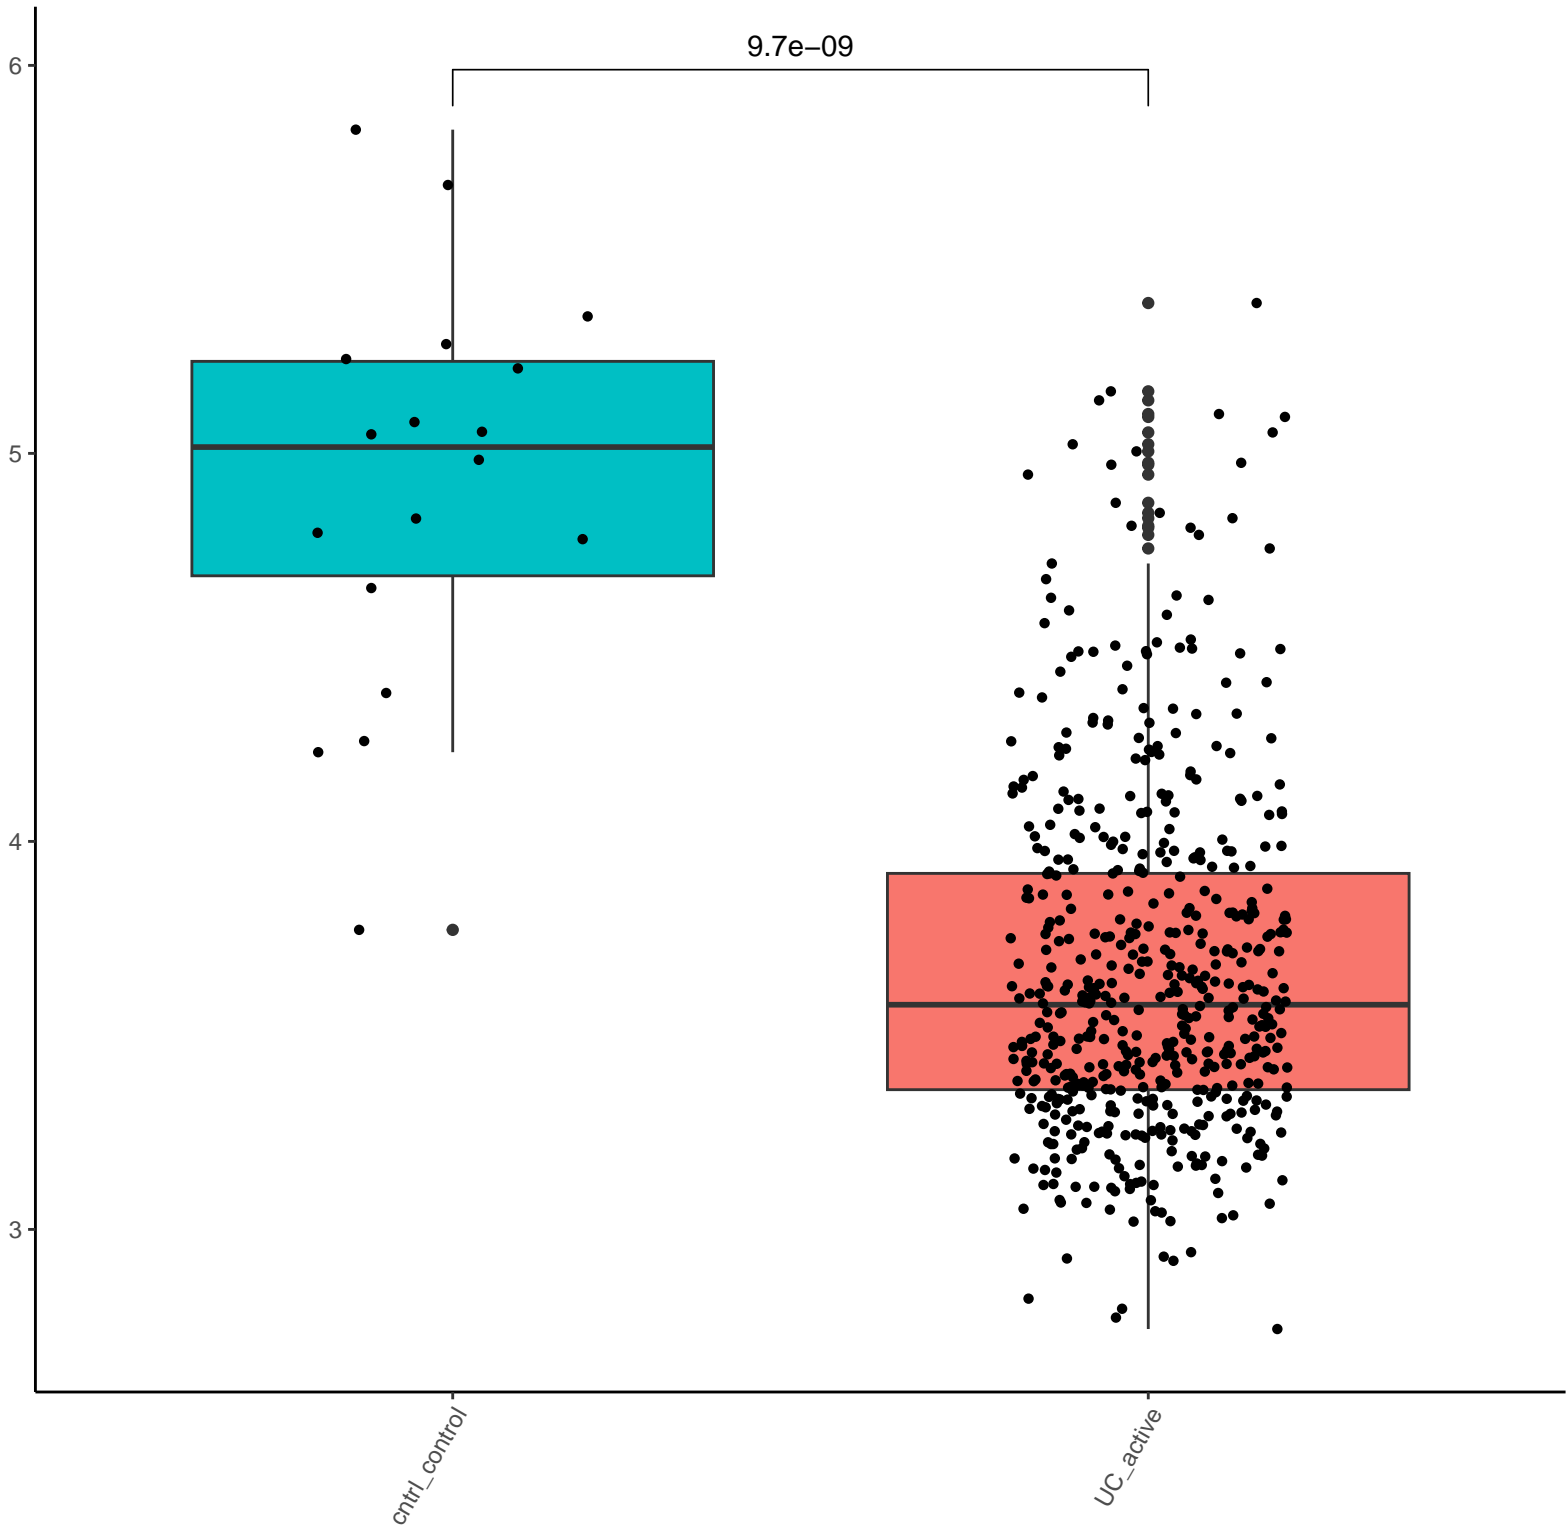

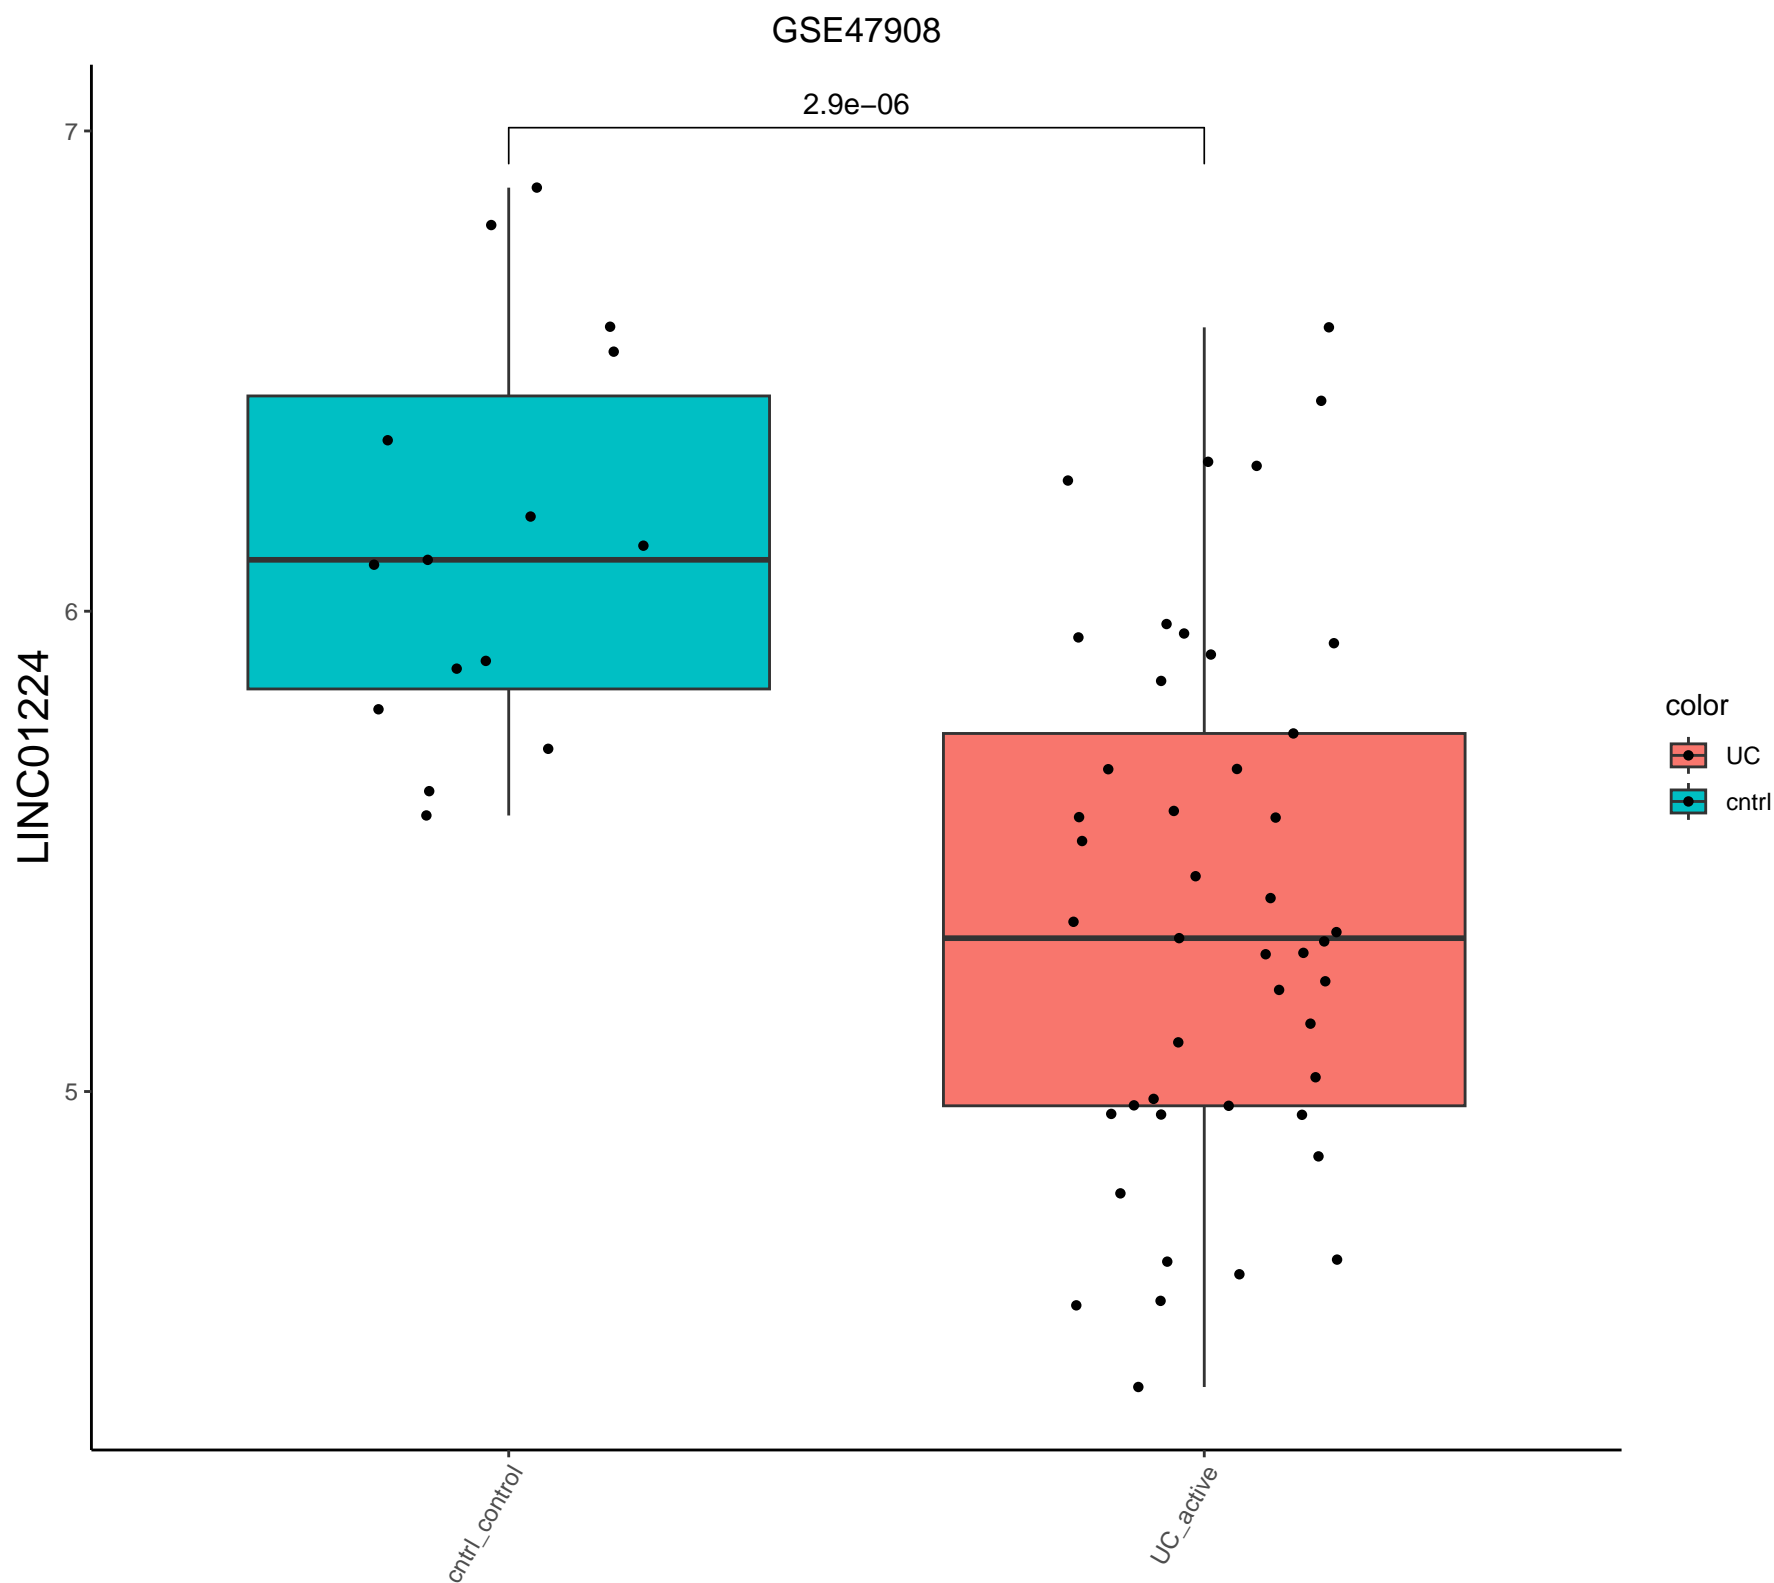

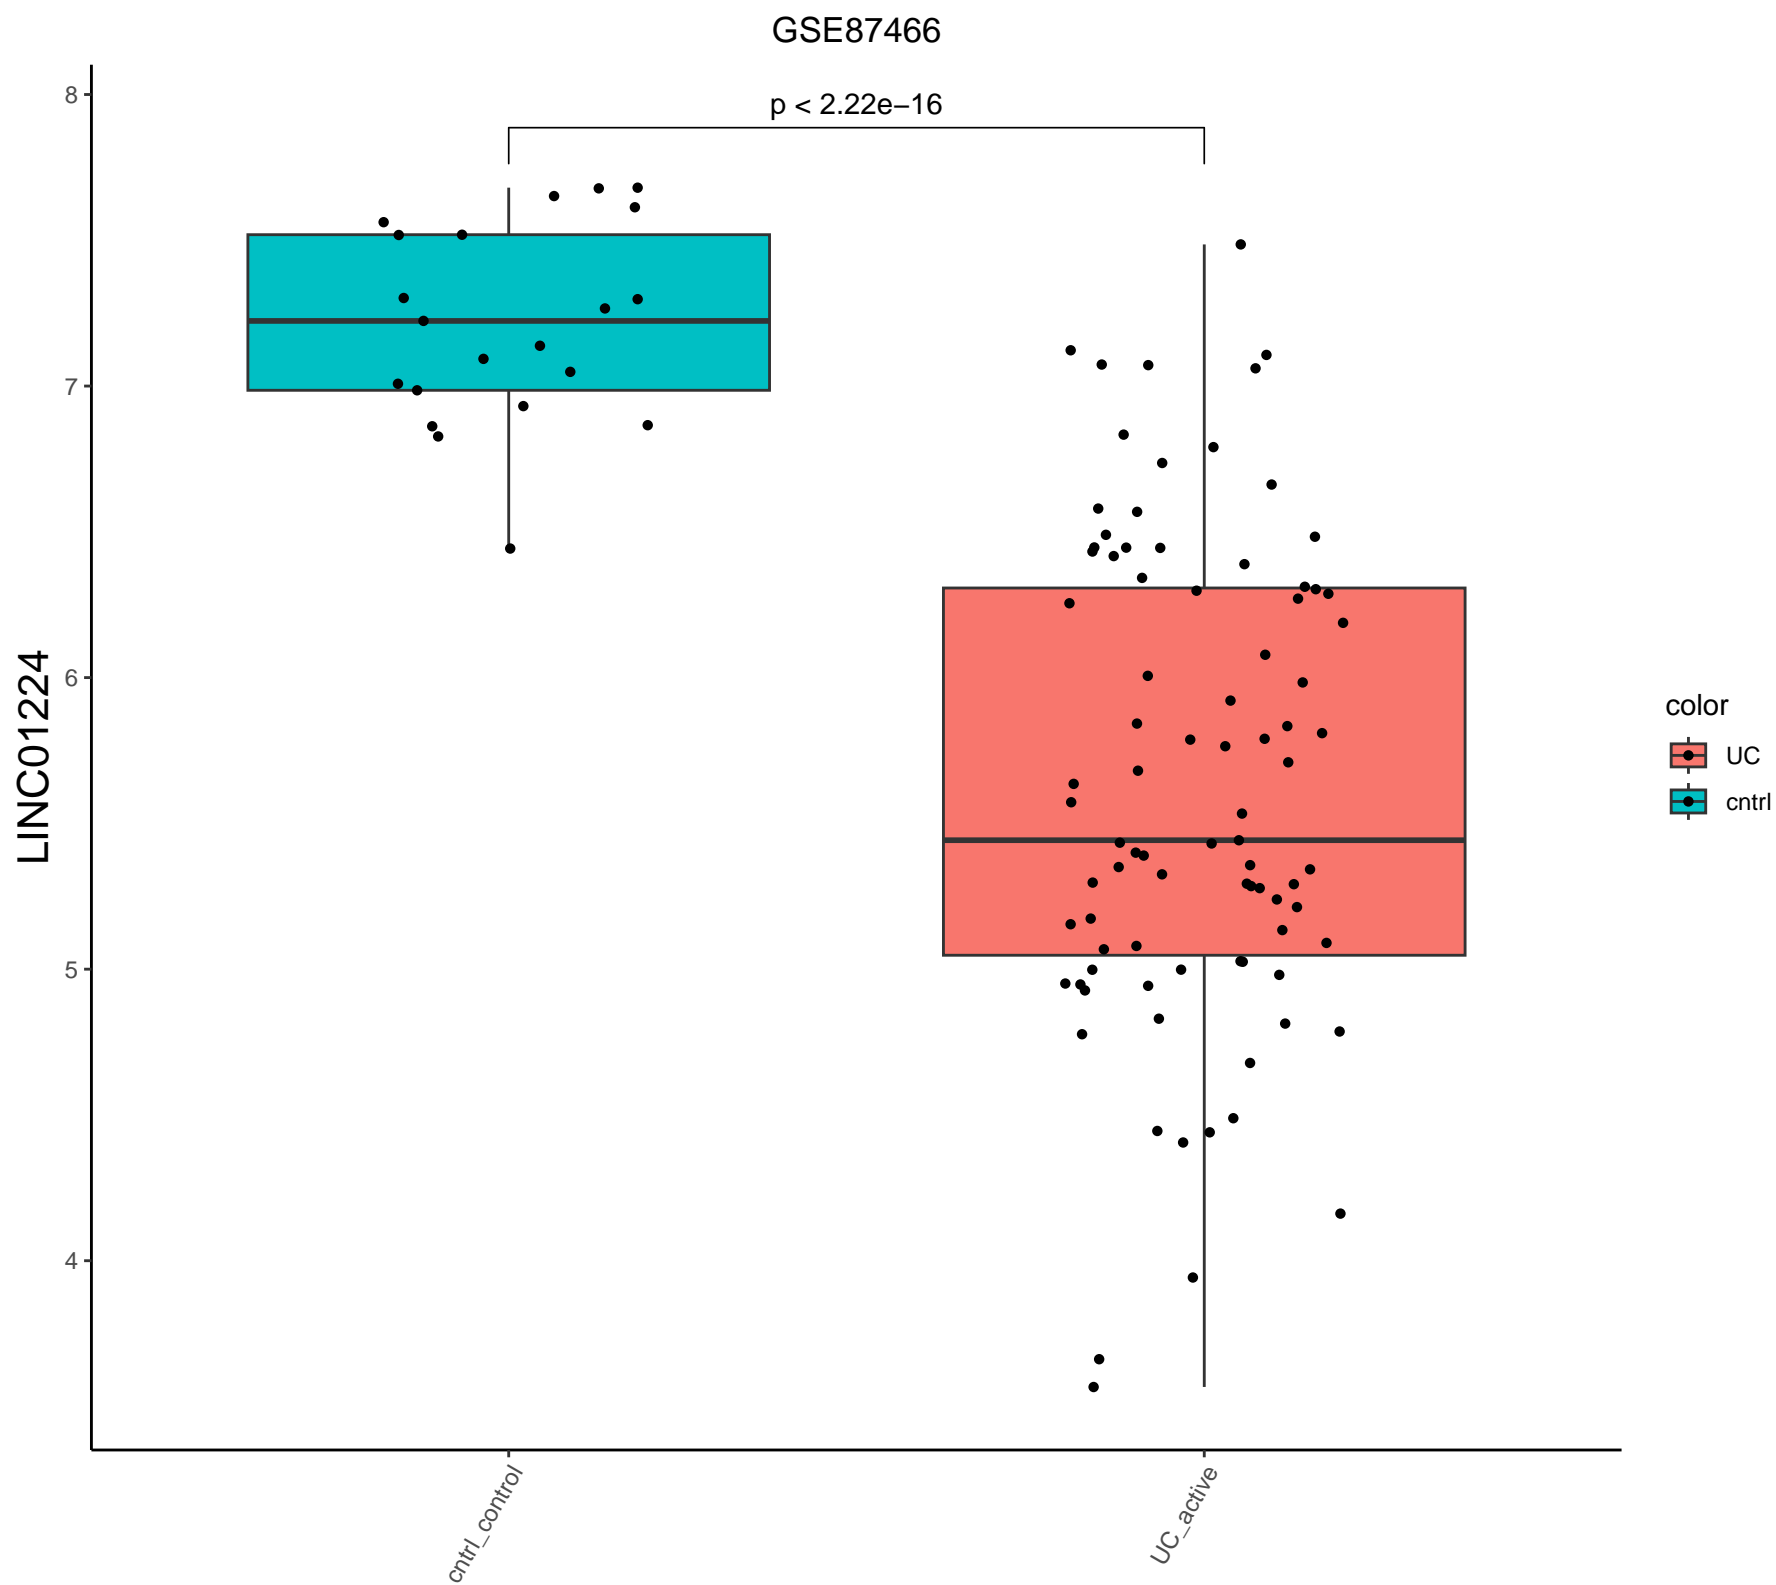

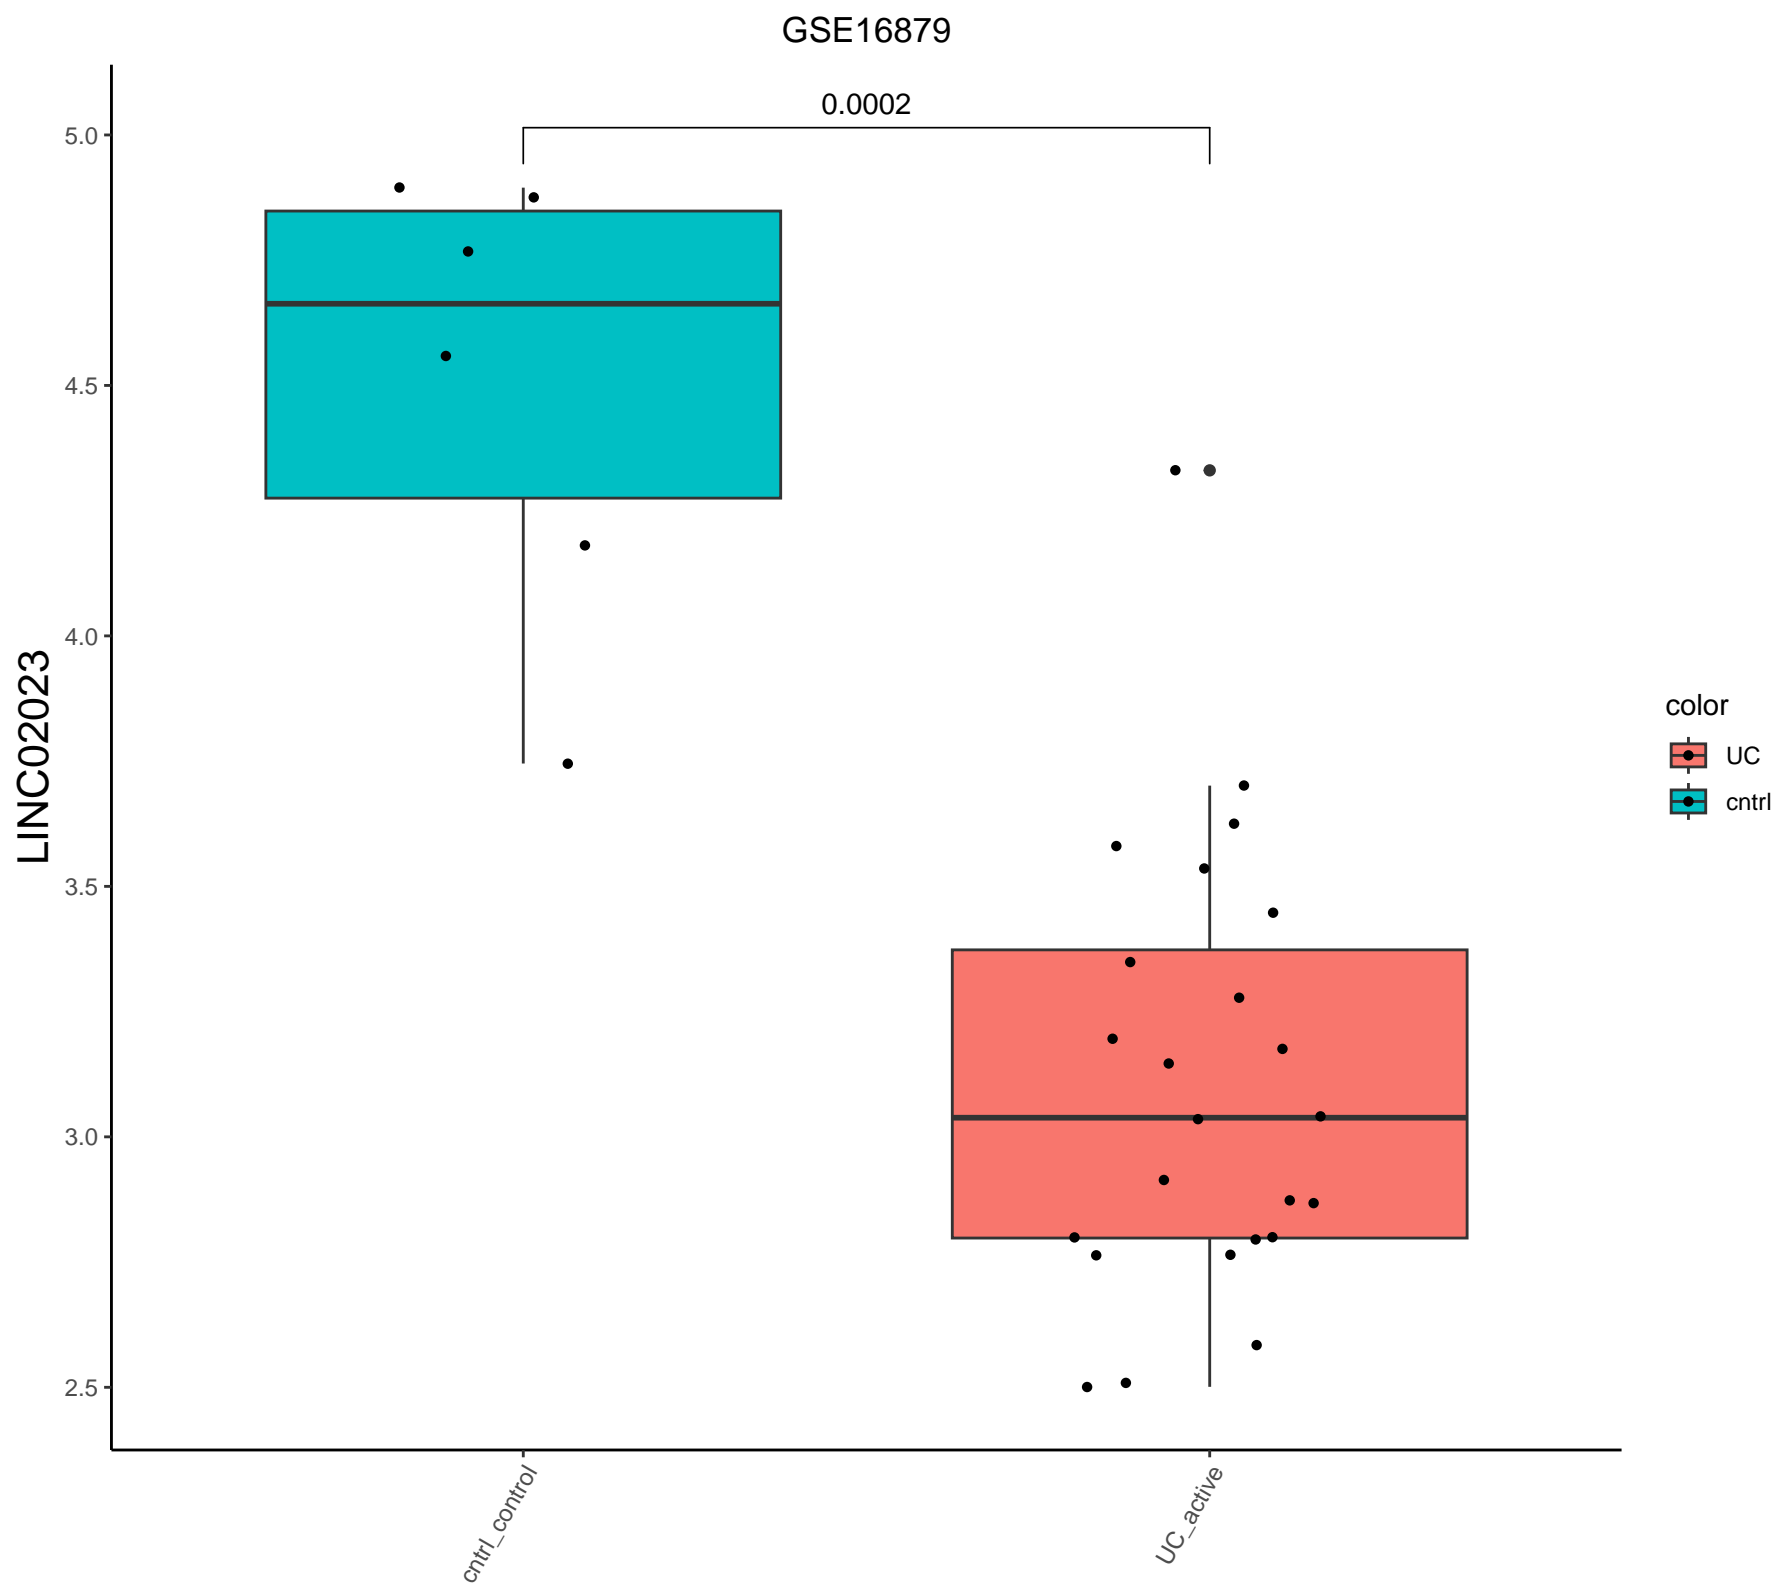

GSE206285

LINC02023

1.1e-06

color  
UC  
cntrl

cntrl\_control

UC\_active

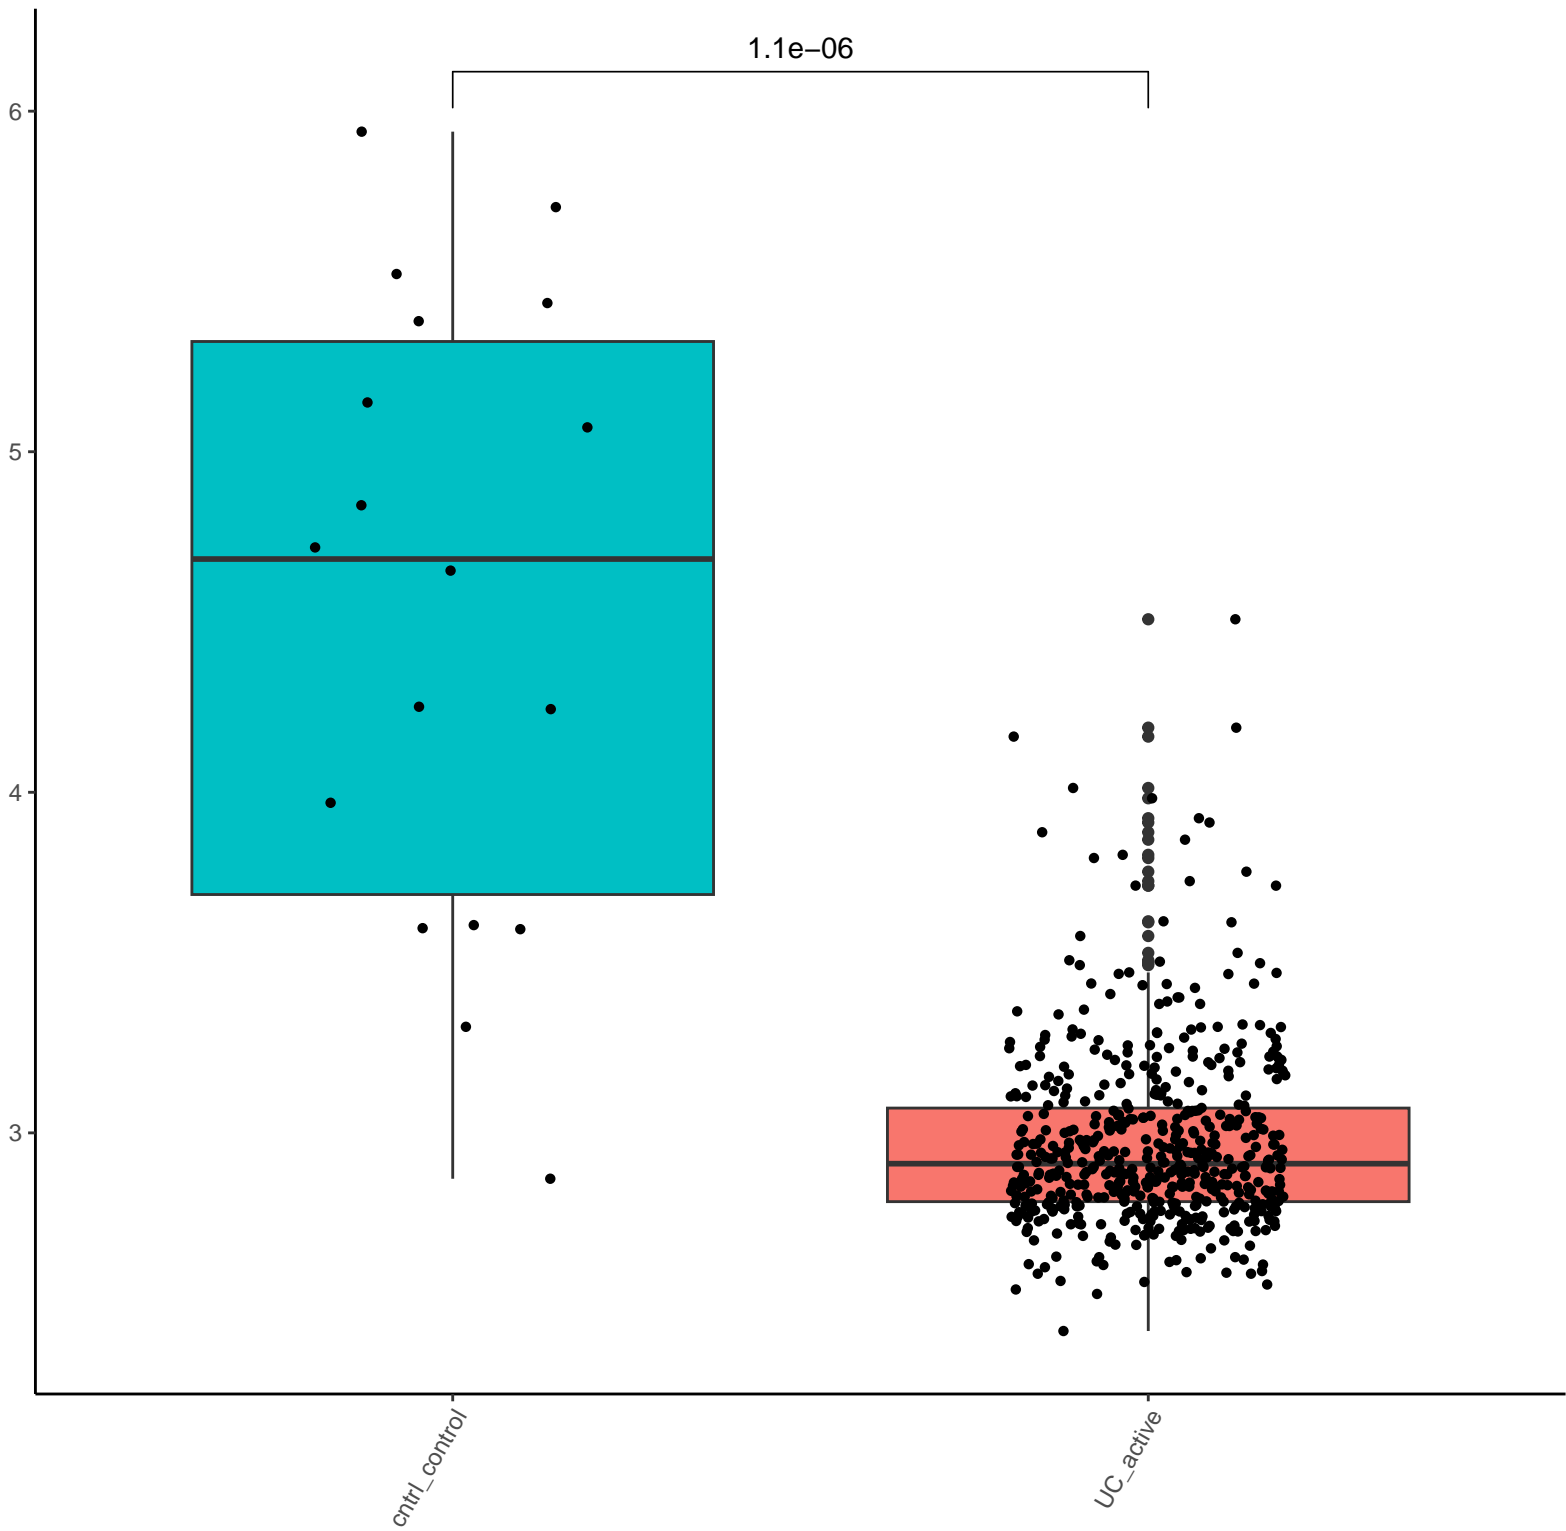

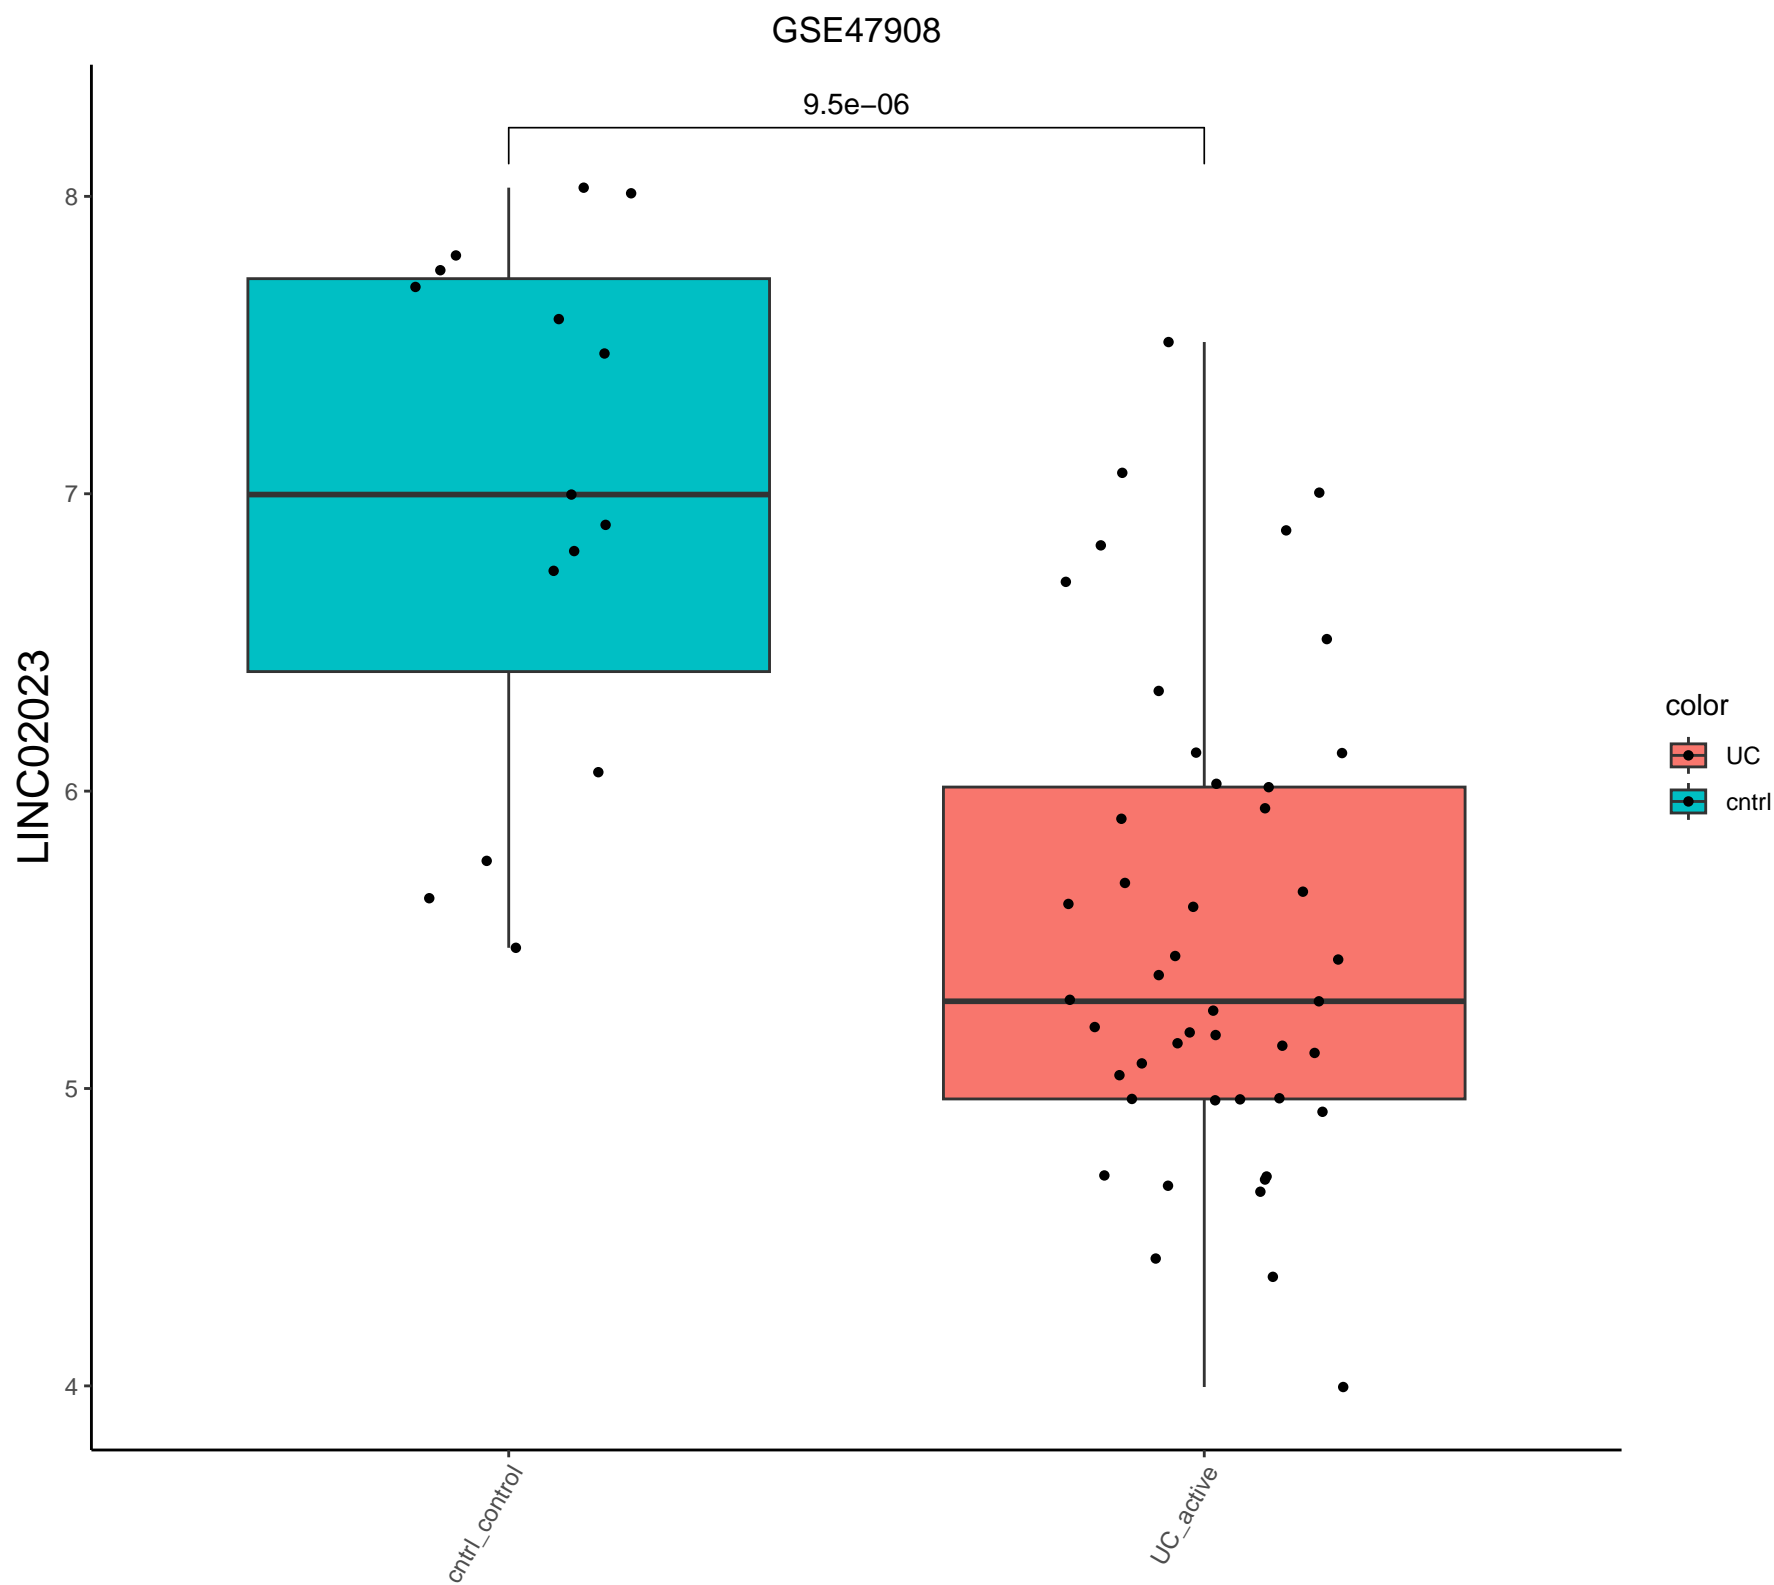

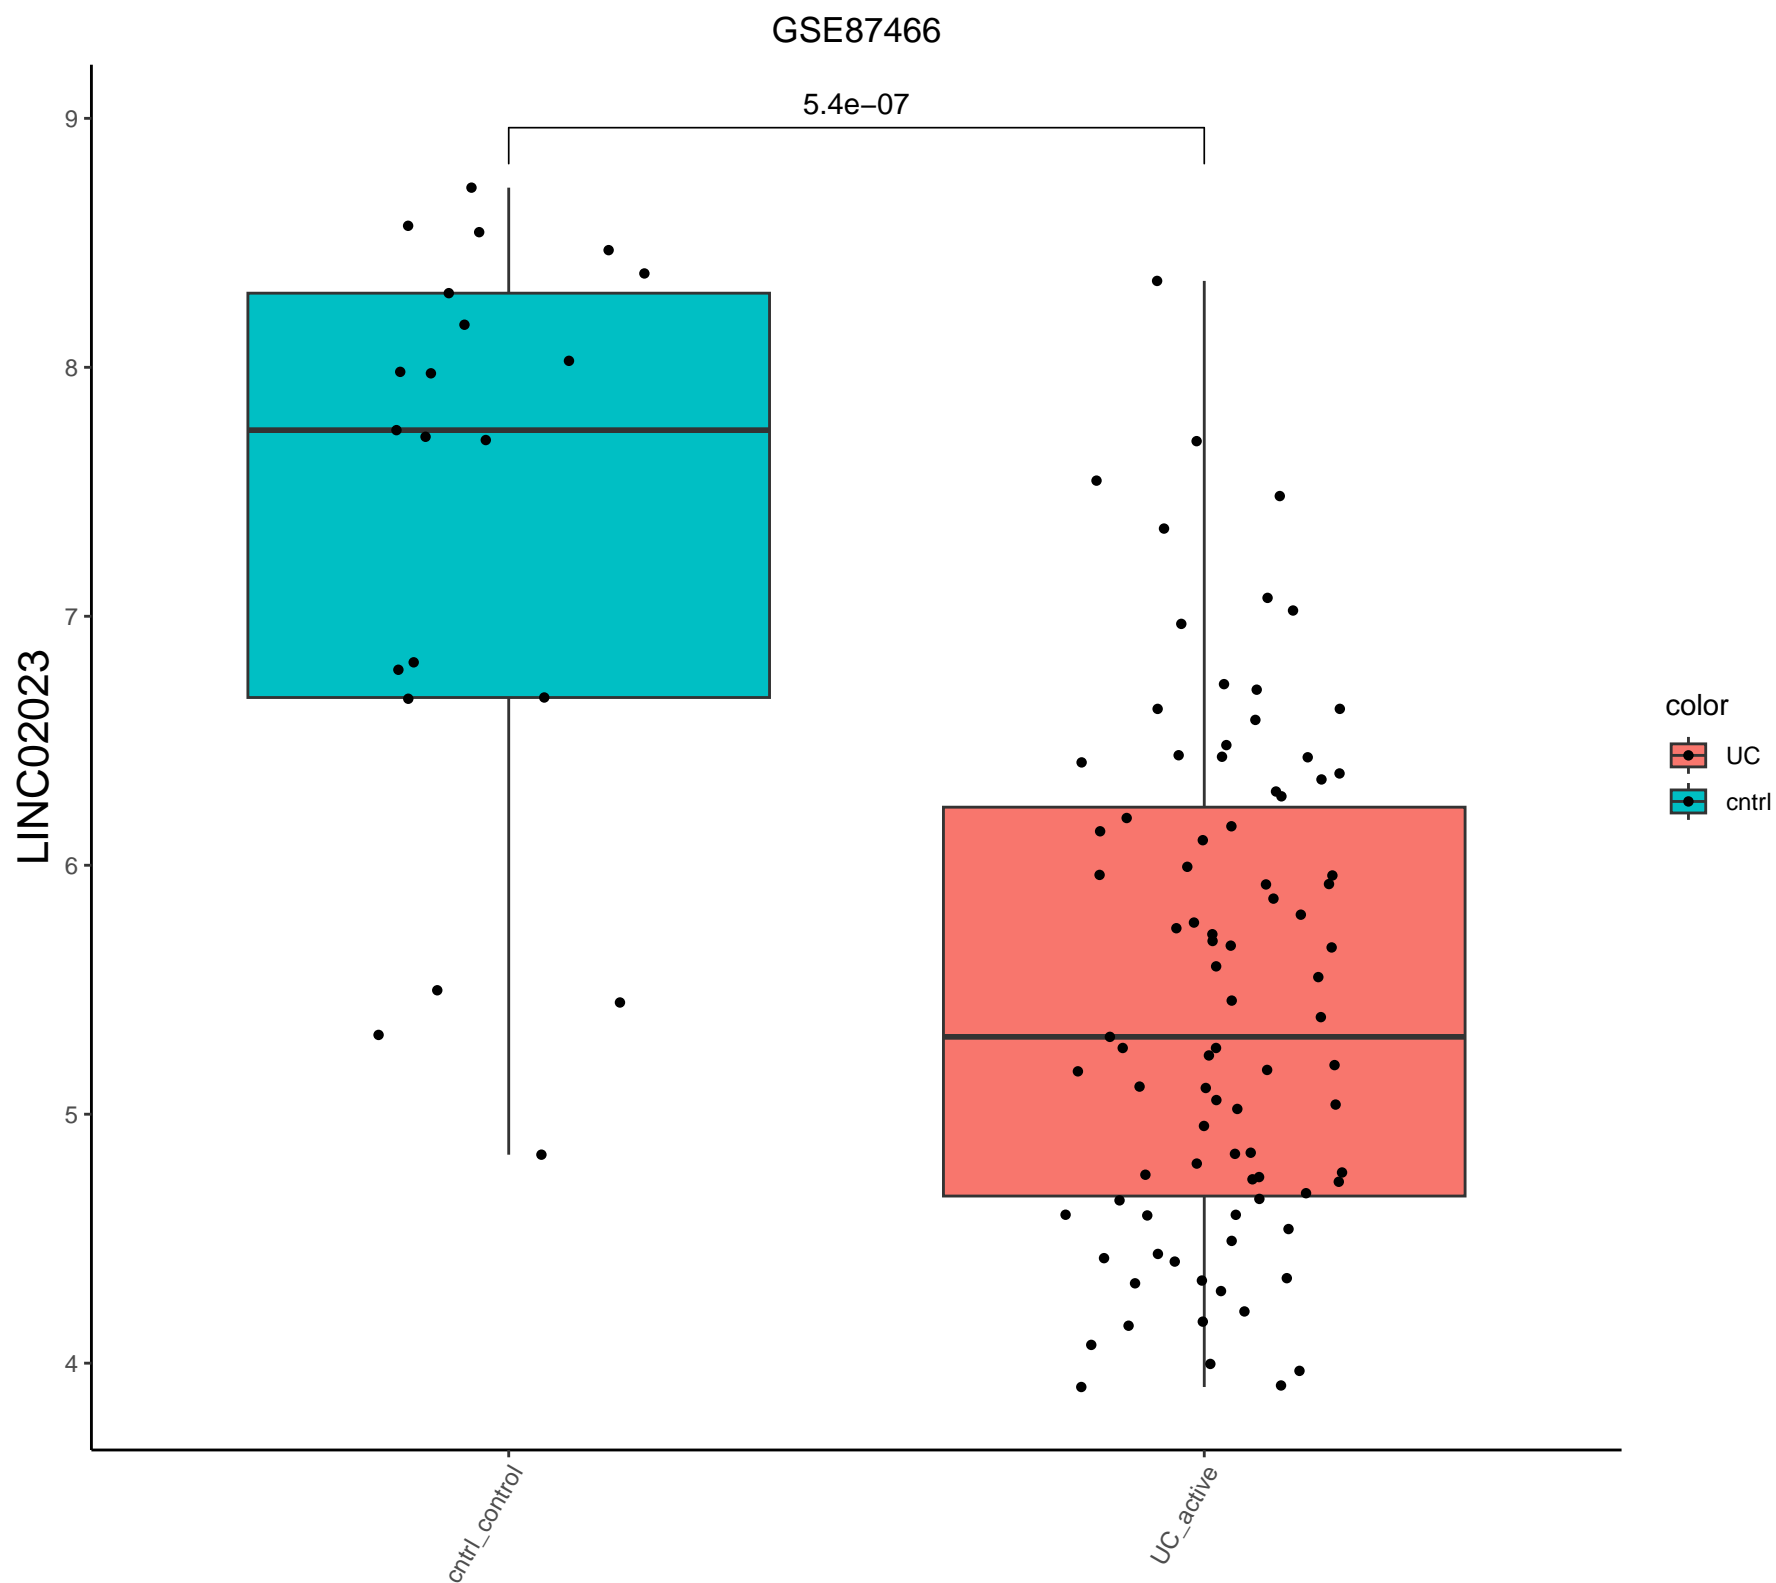

GSE107499

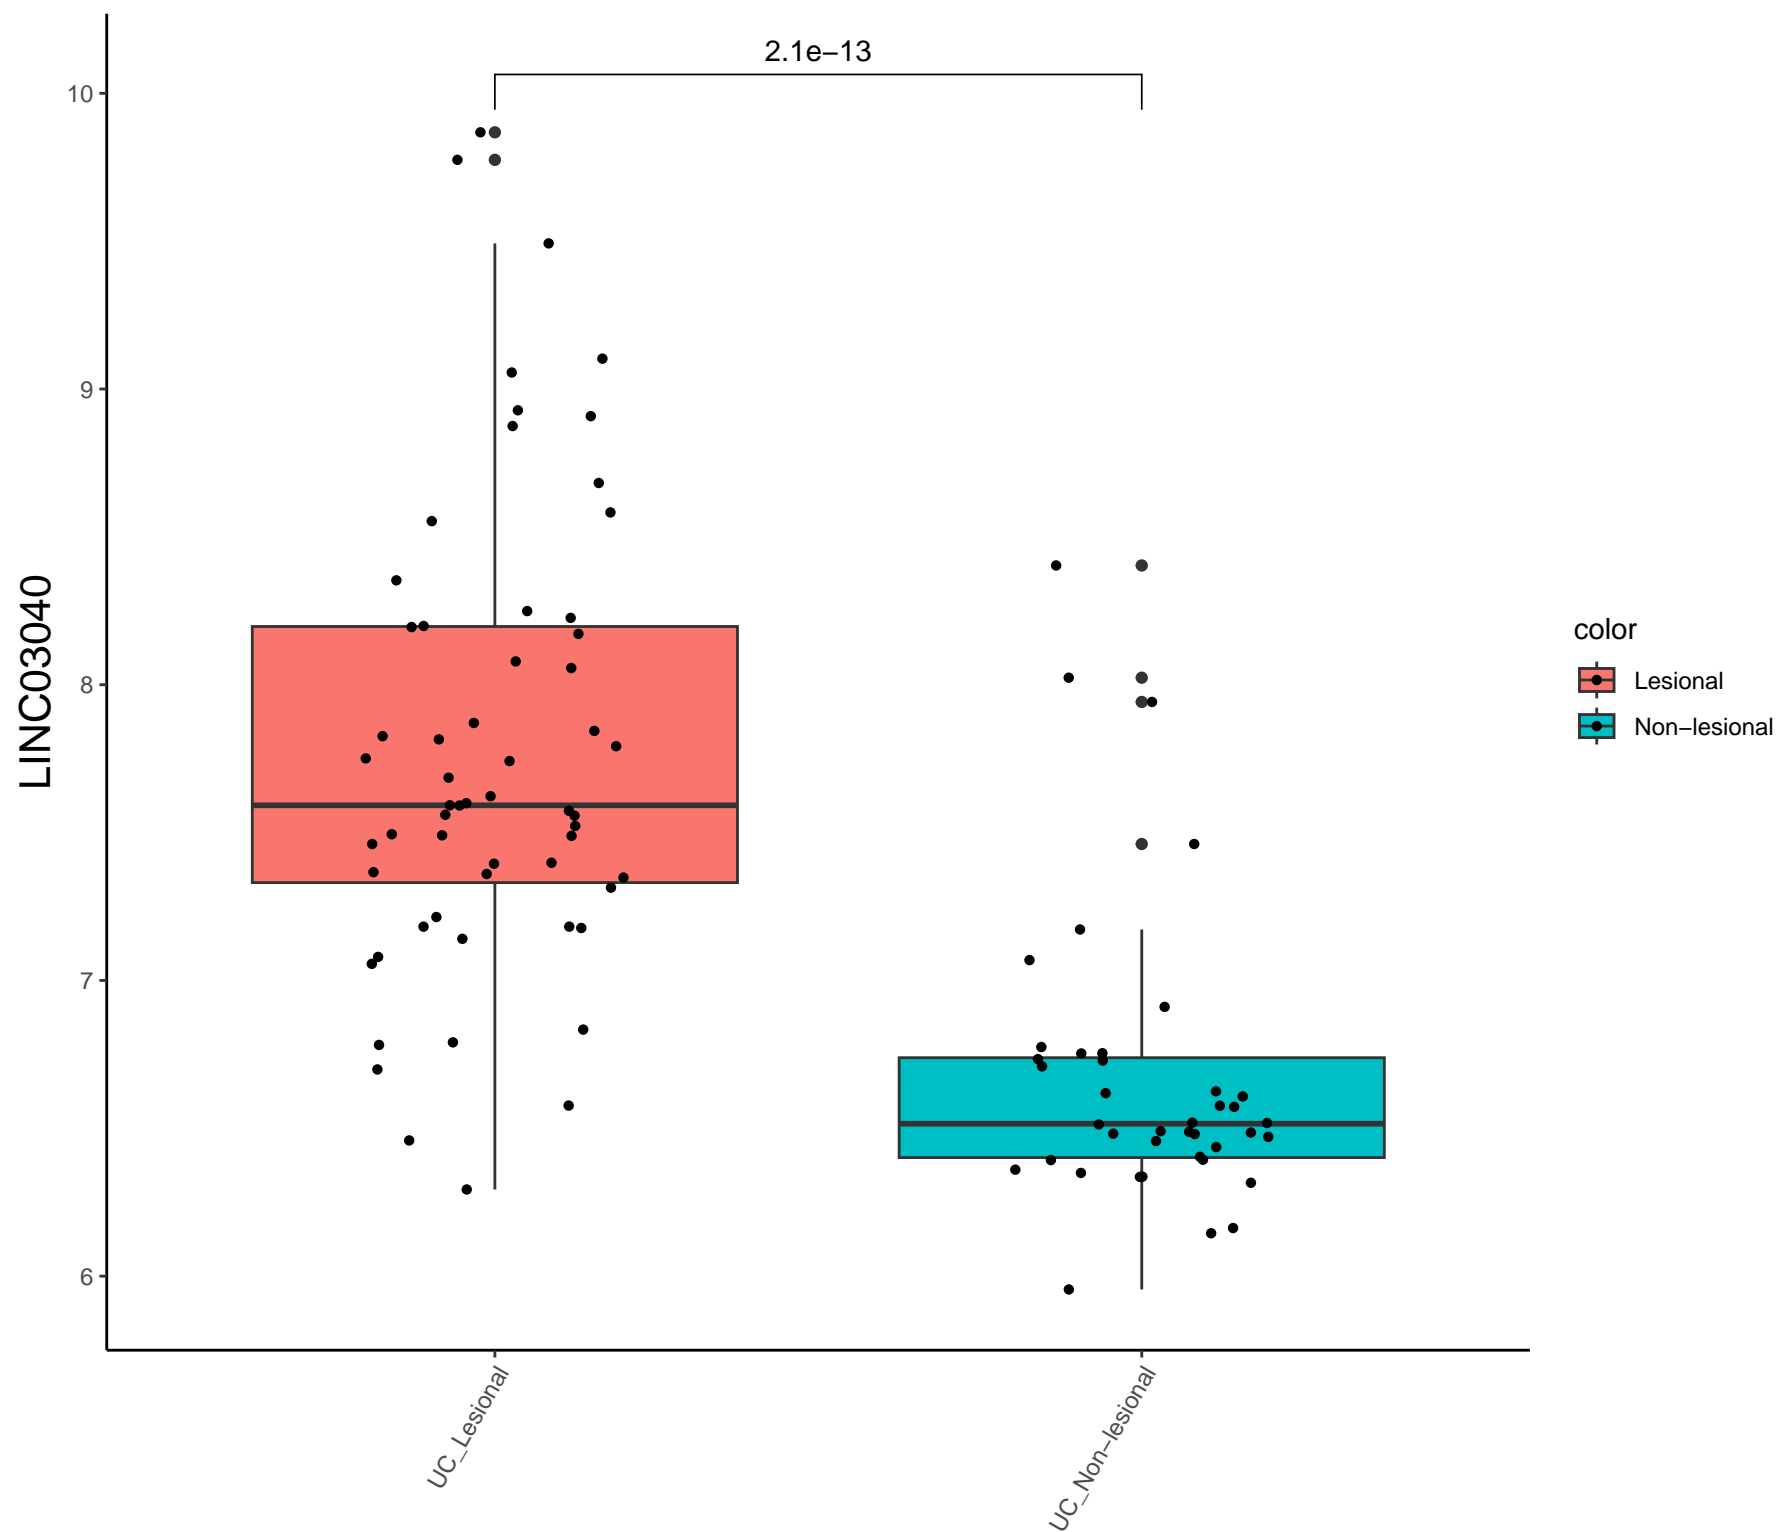



GSE109142

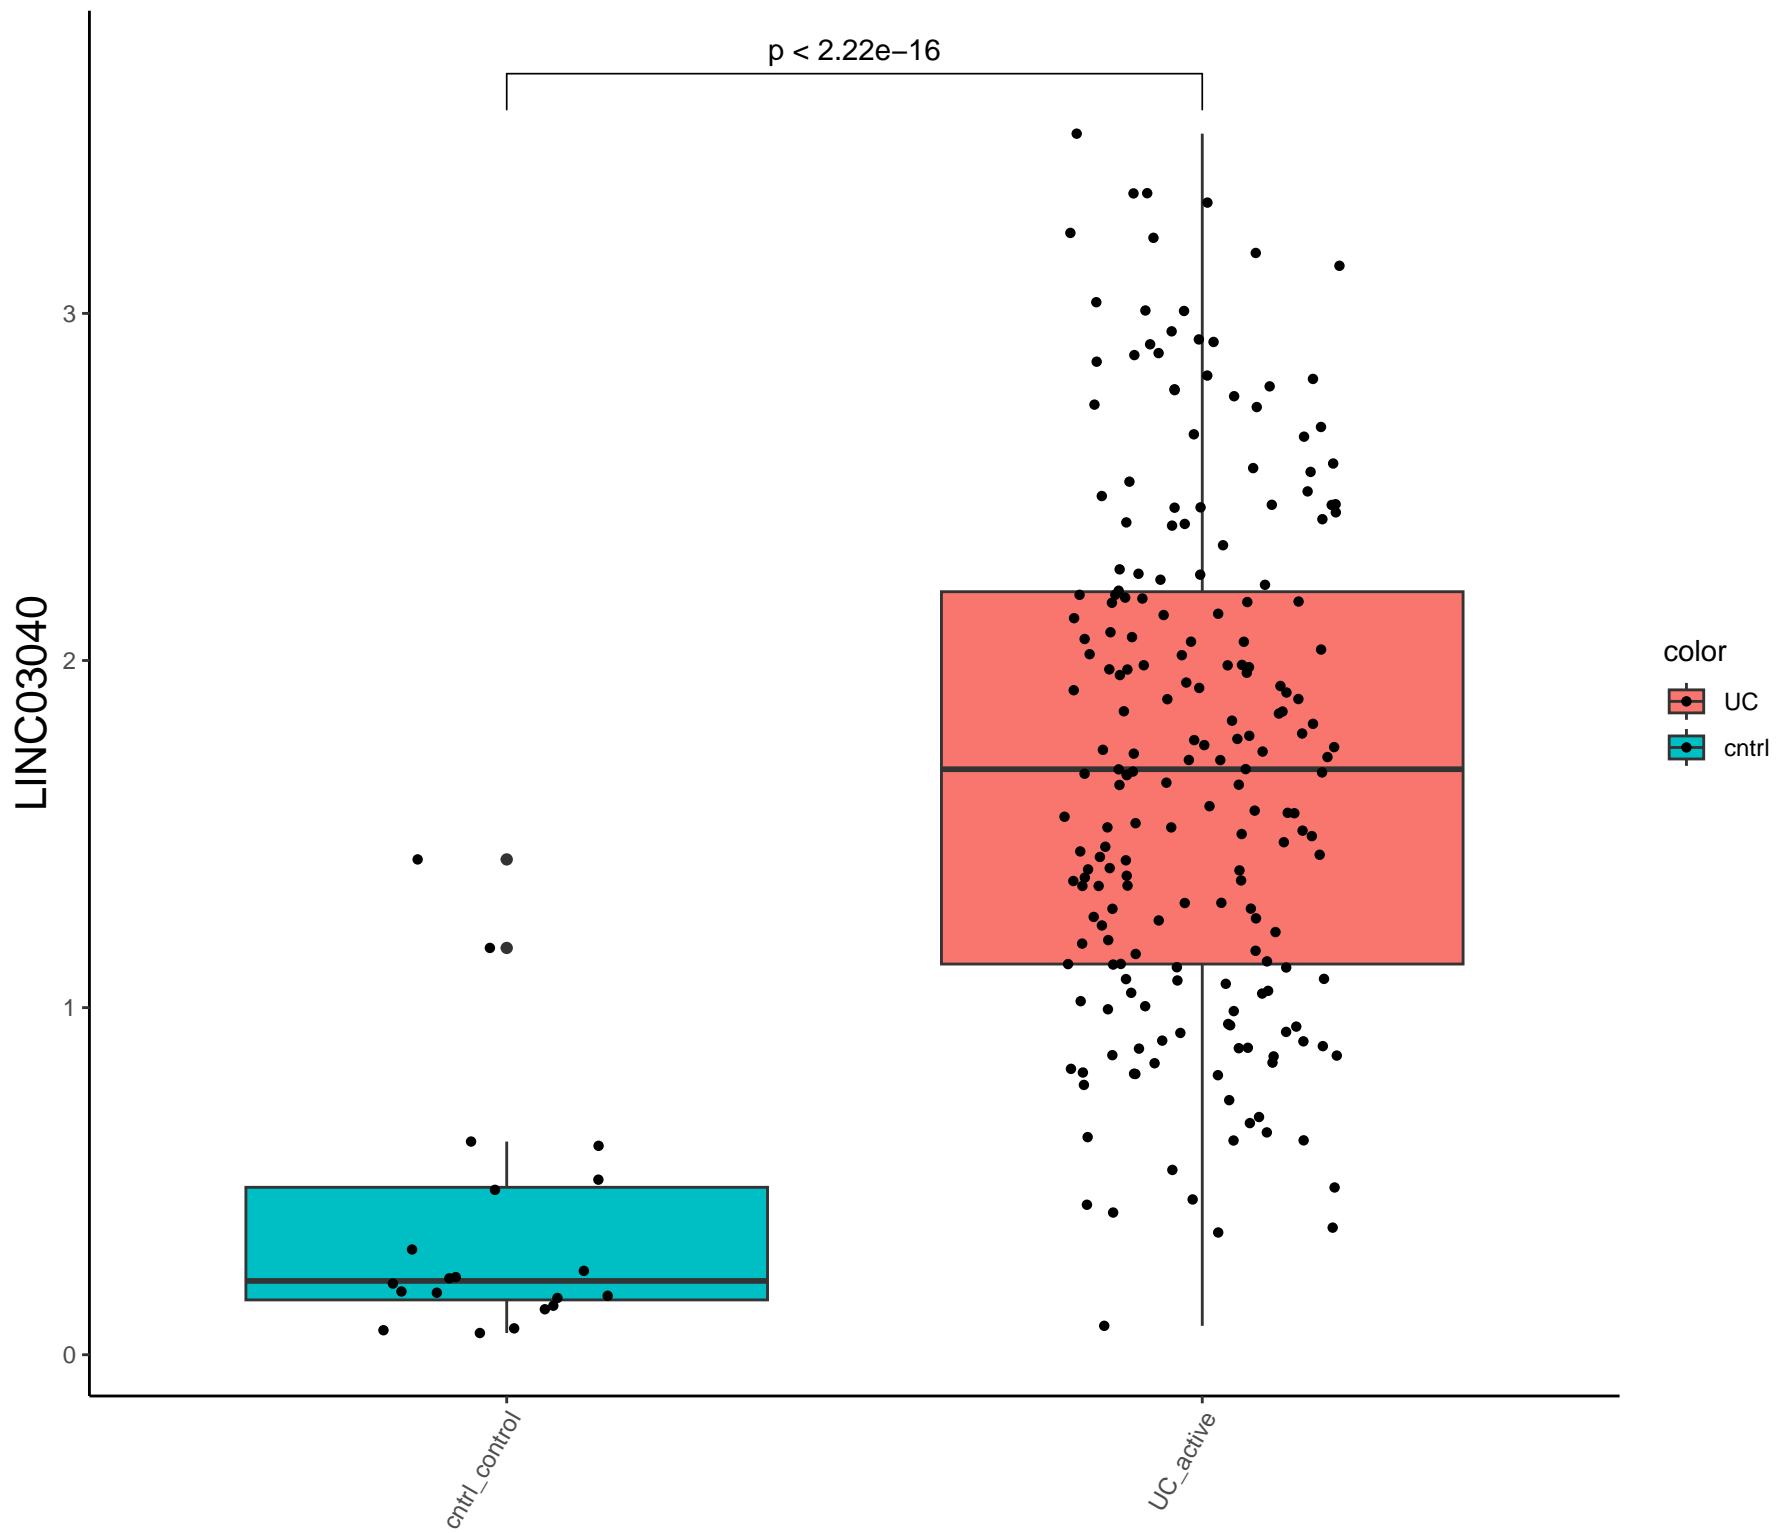

GSE128682

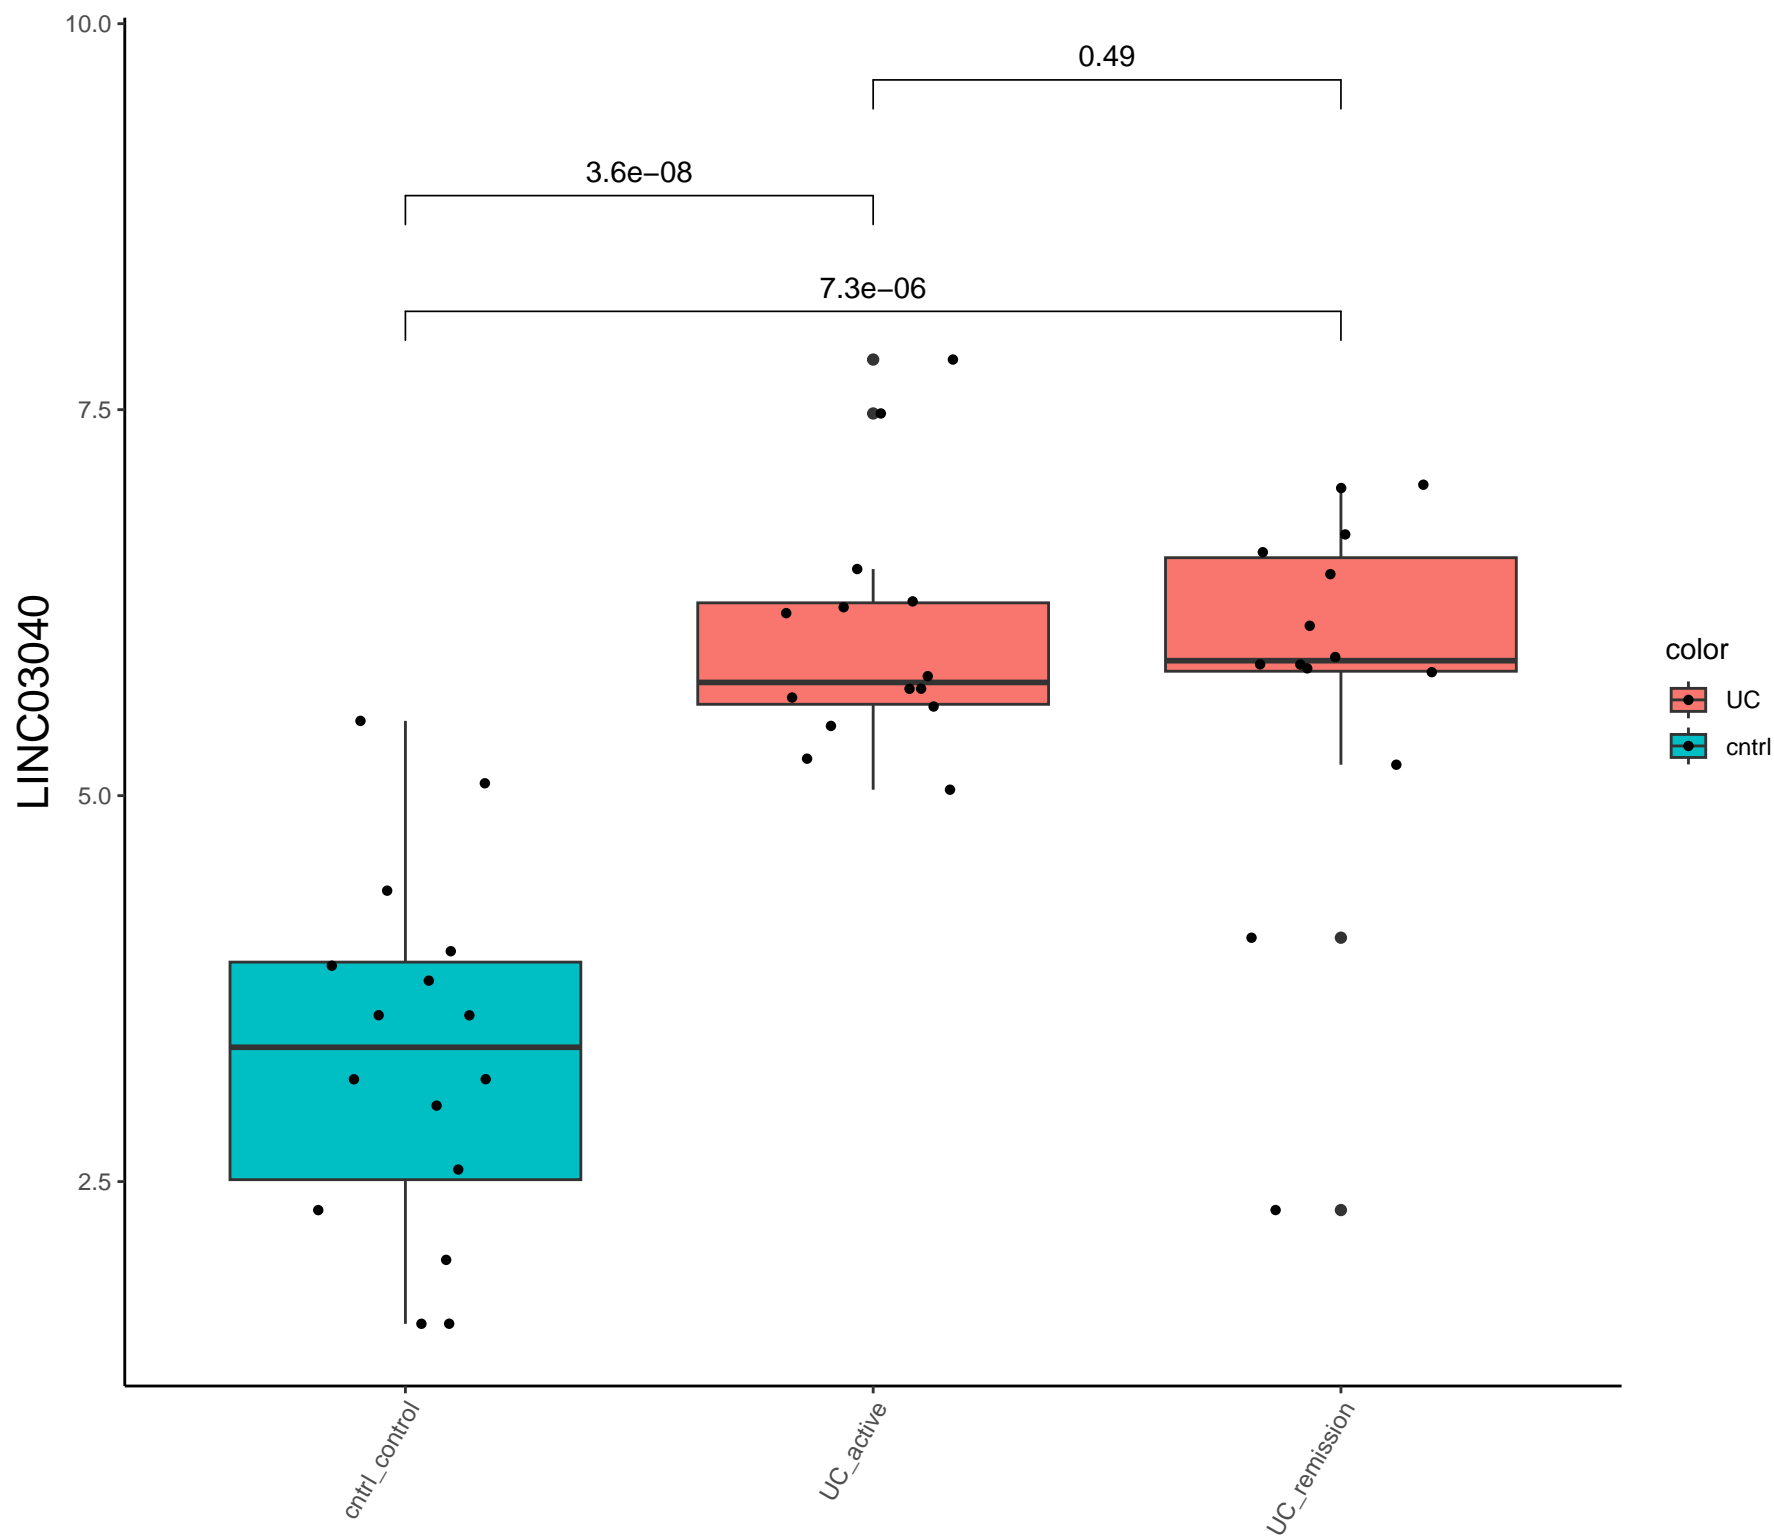

GSE16879

LINC03040

0.0014

color

UC  
cntrl

cntrl\_control

UC\_active

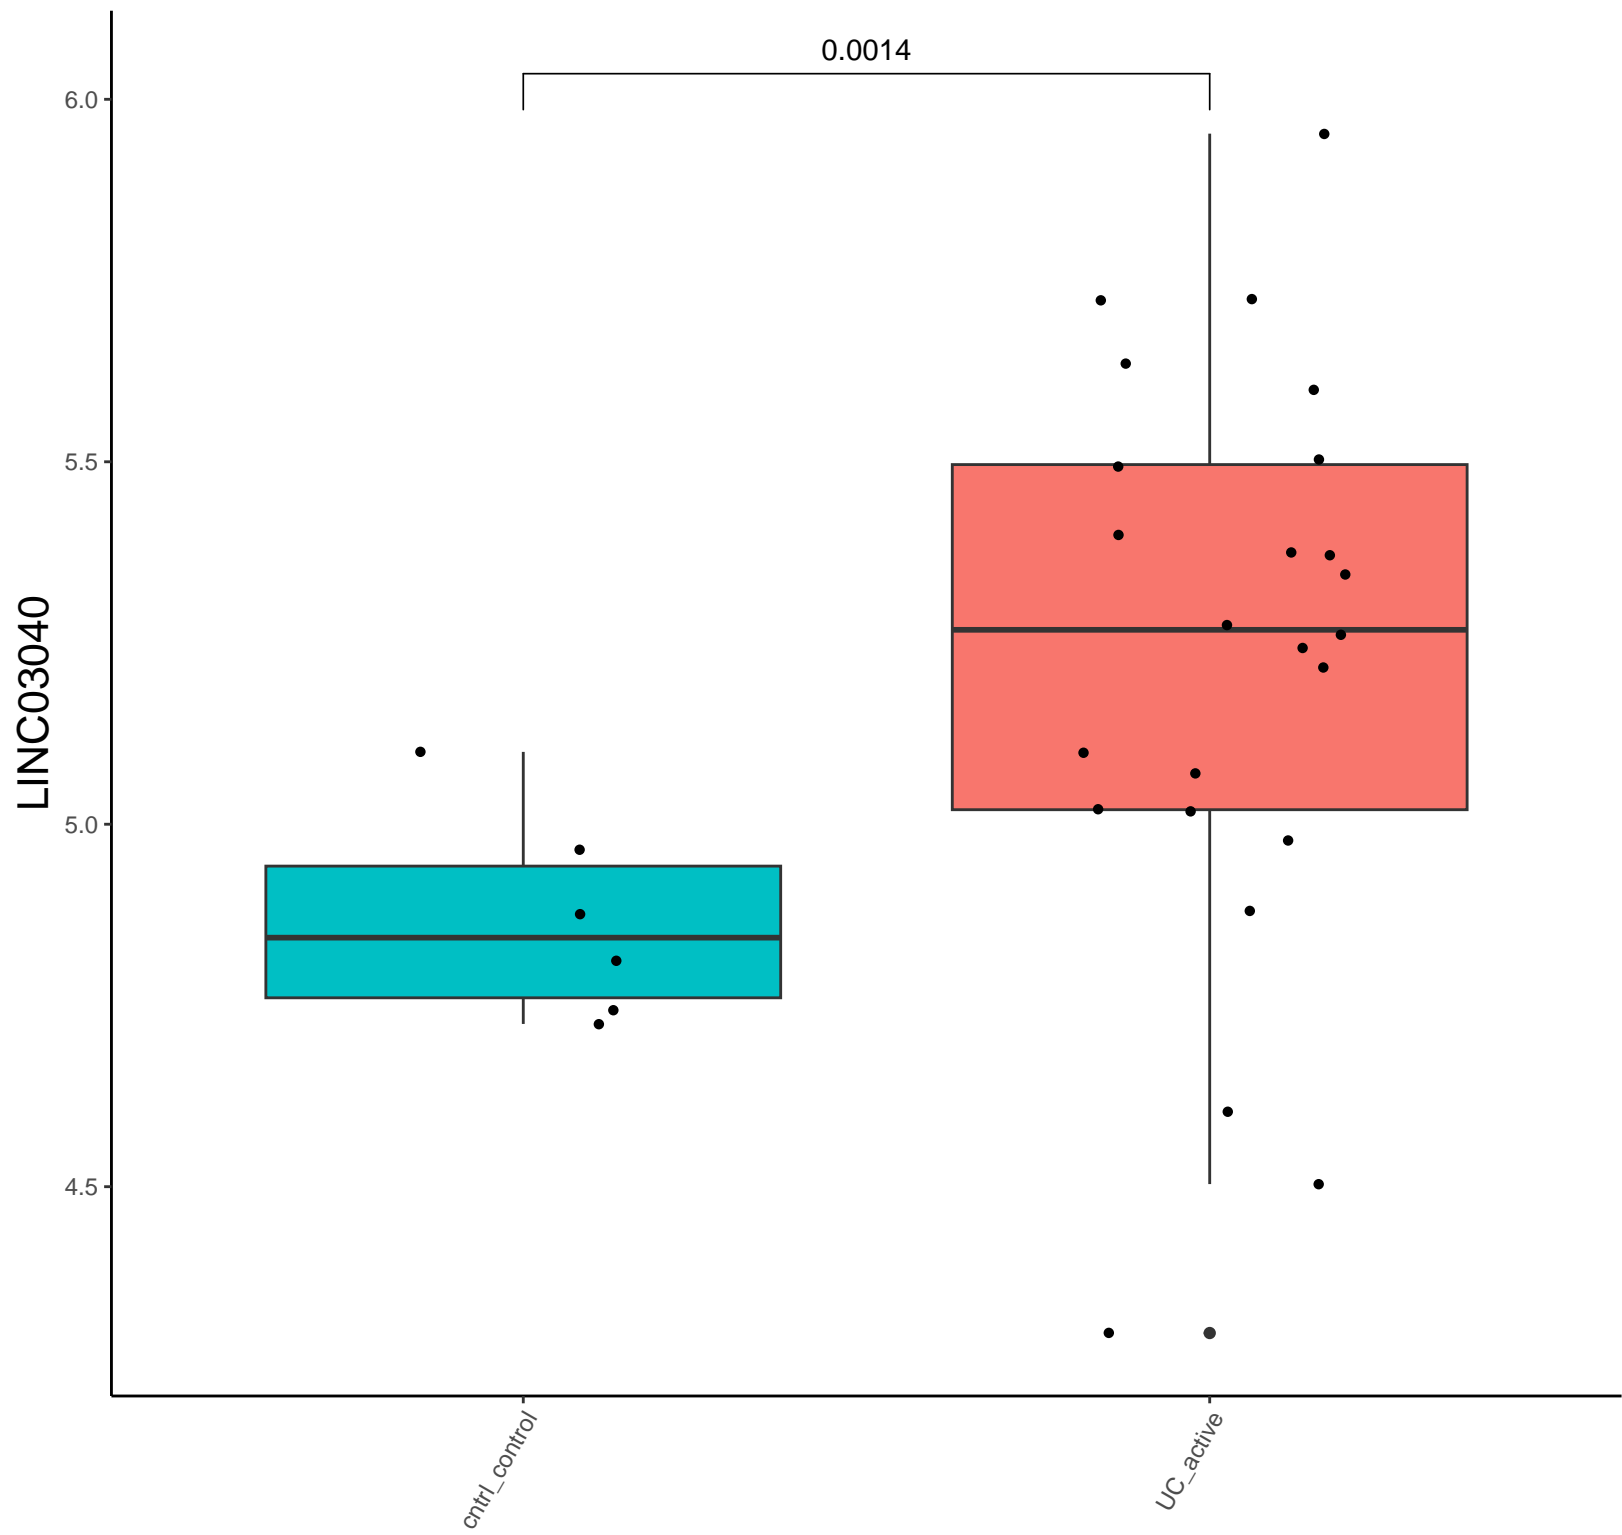

GSE206285

LINC03040

$8.7e-07$

color

- UC
- cntrl

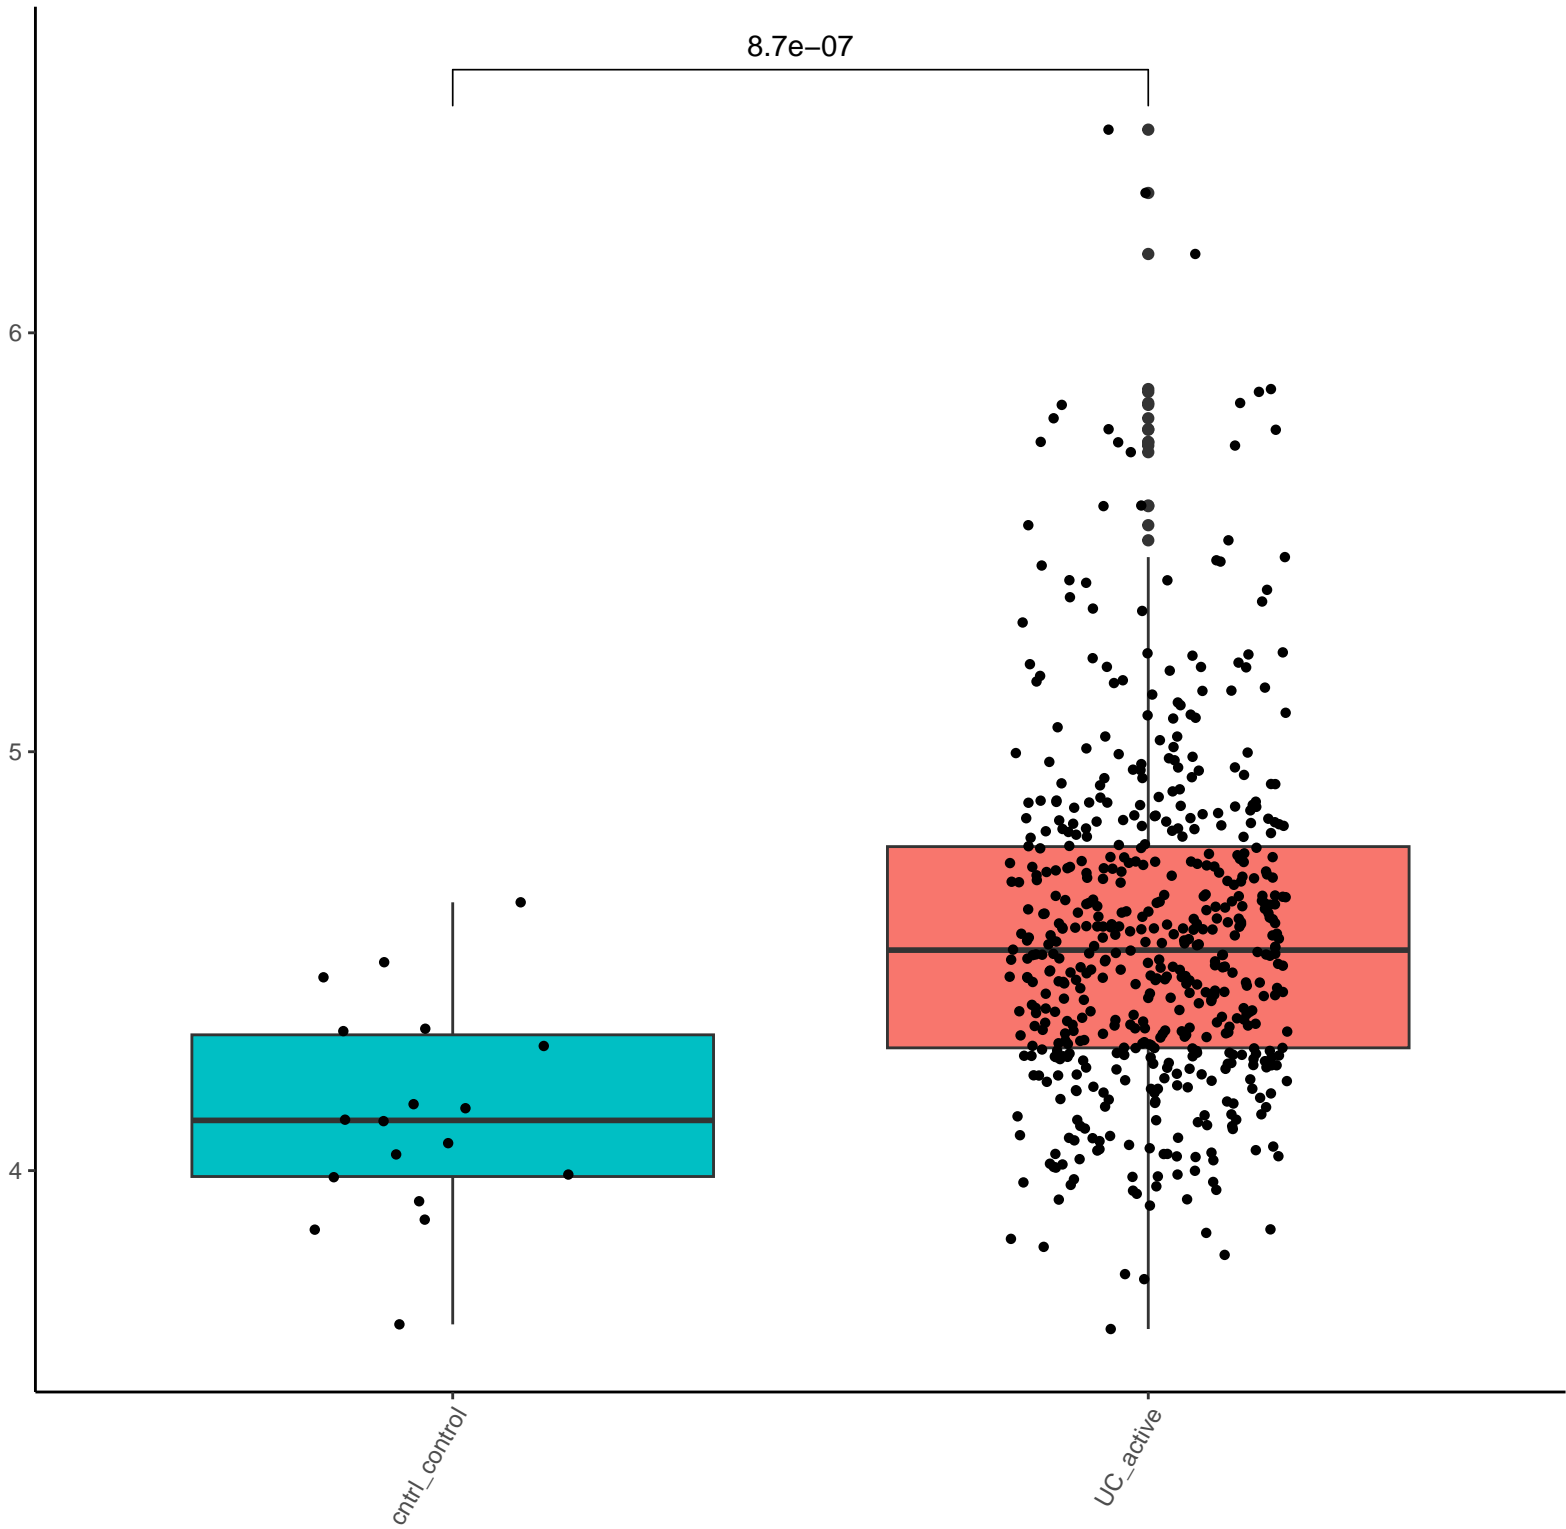

GSE47908

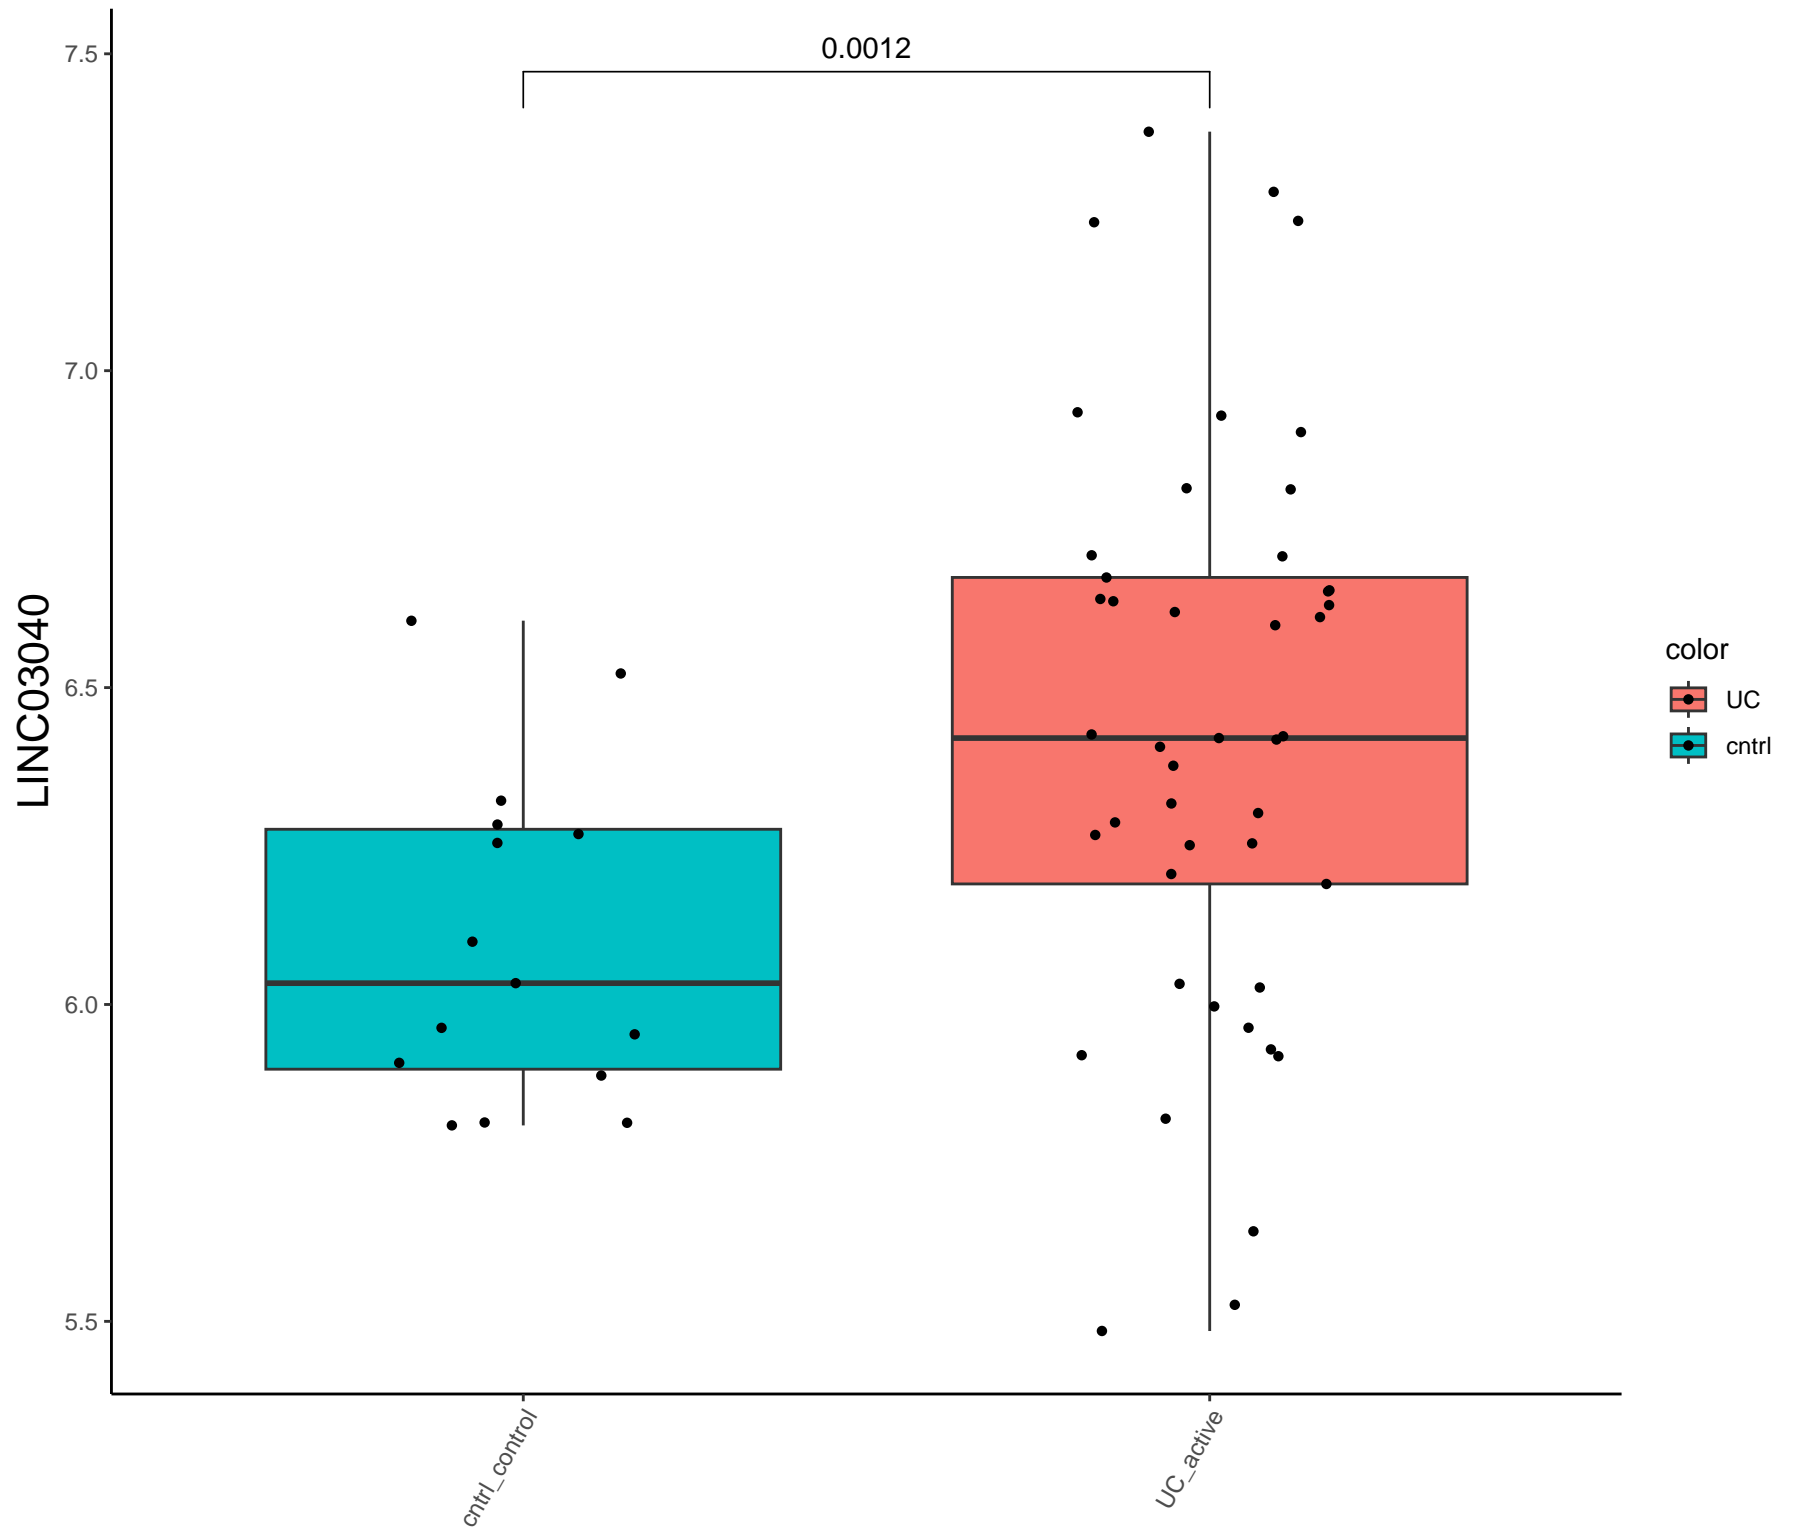

GSE59071

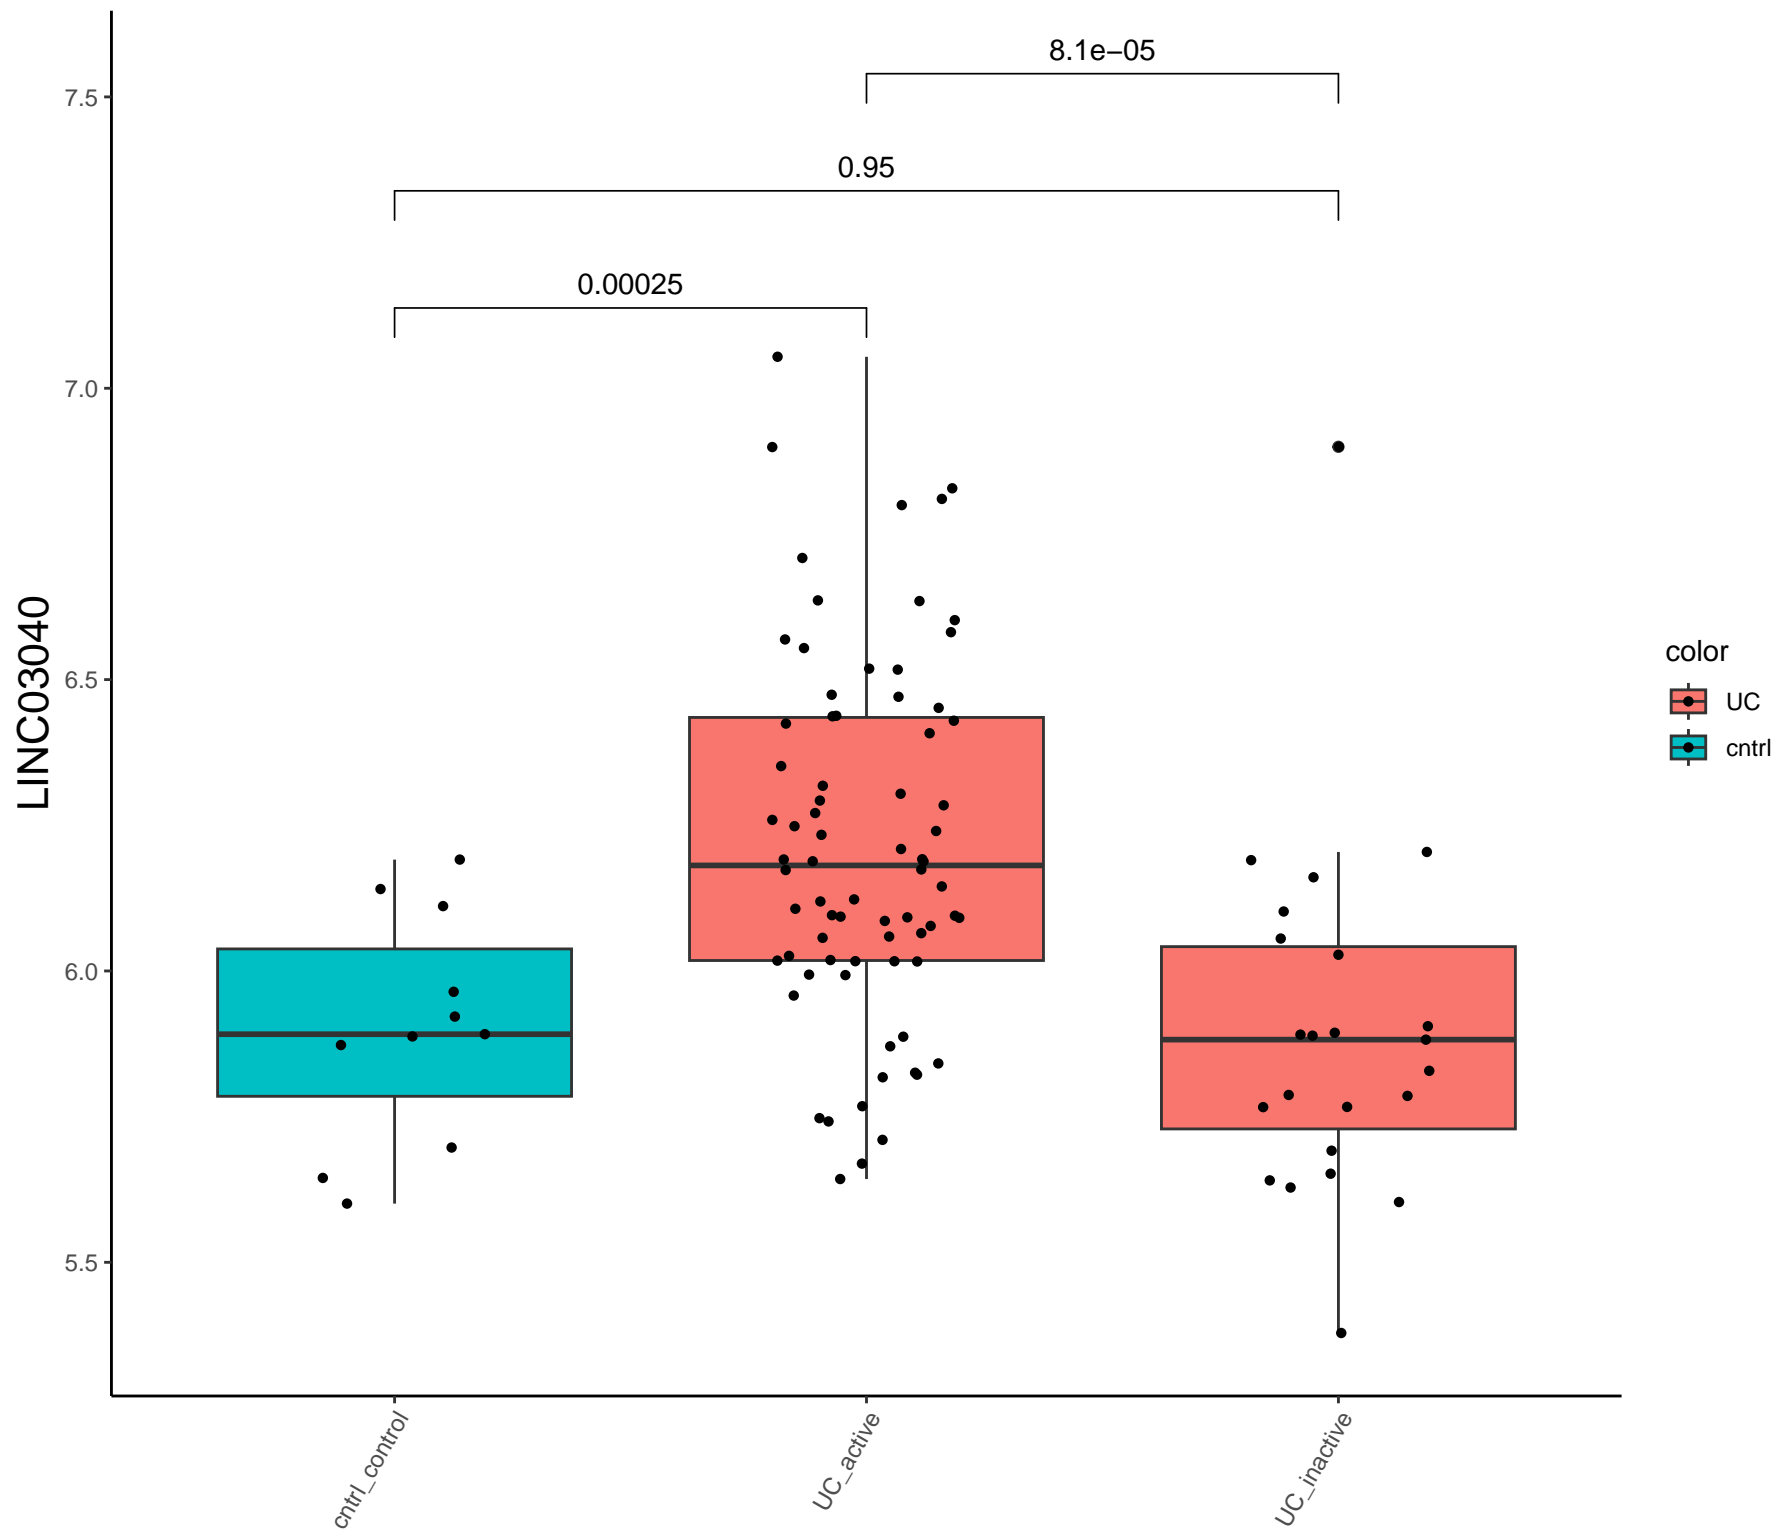

GSE87466

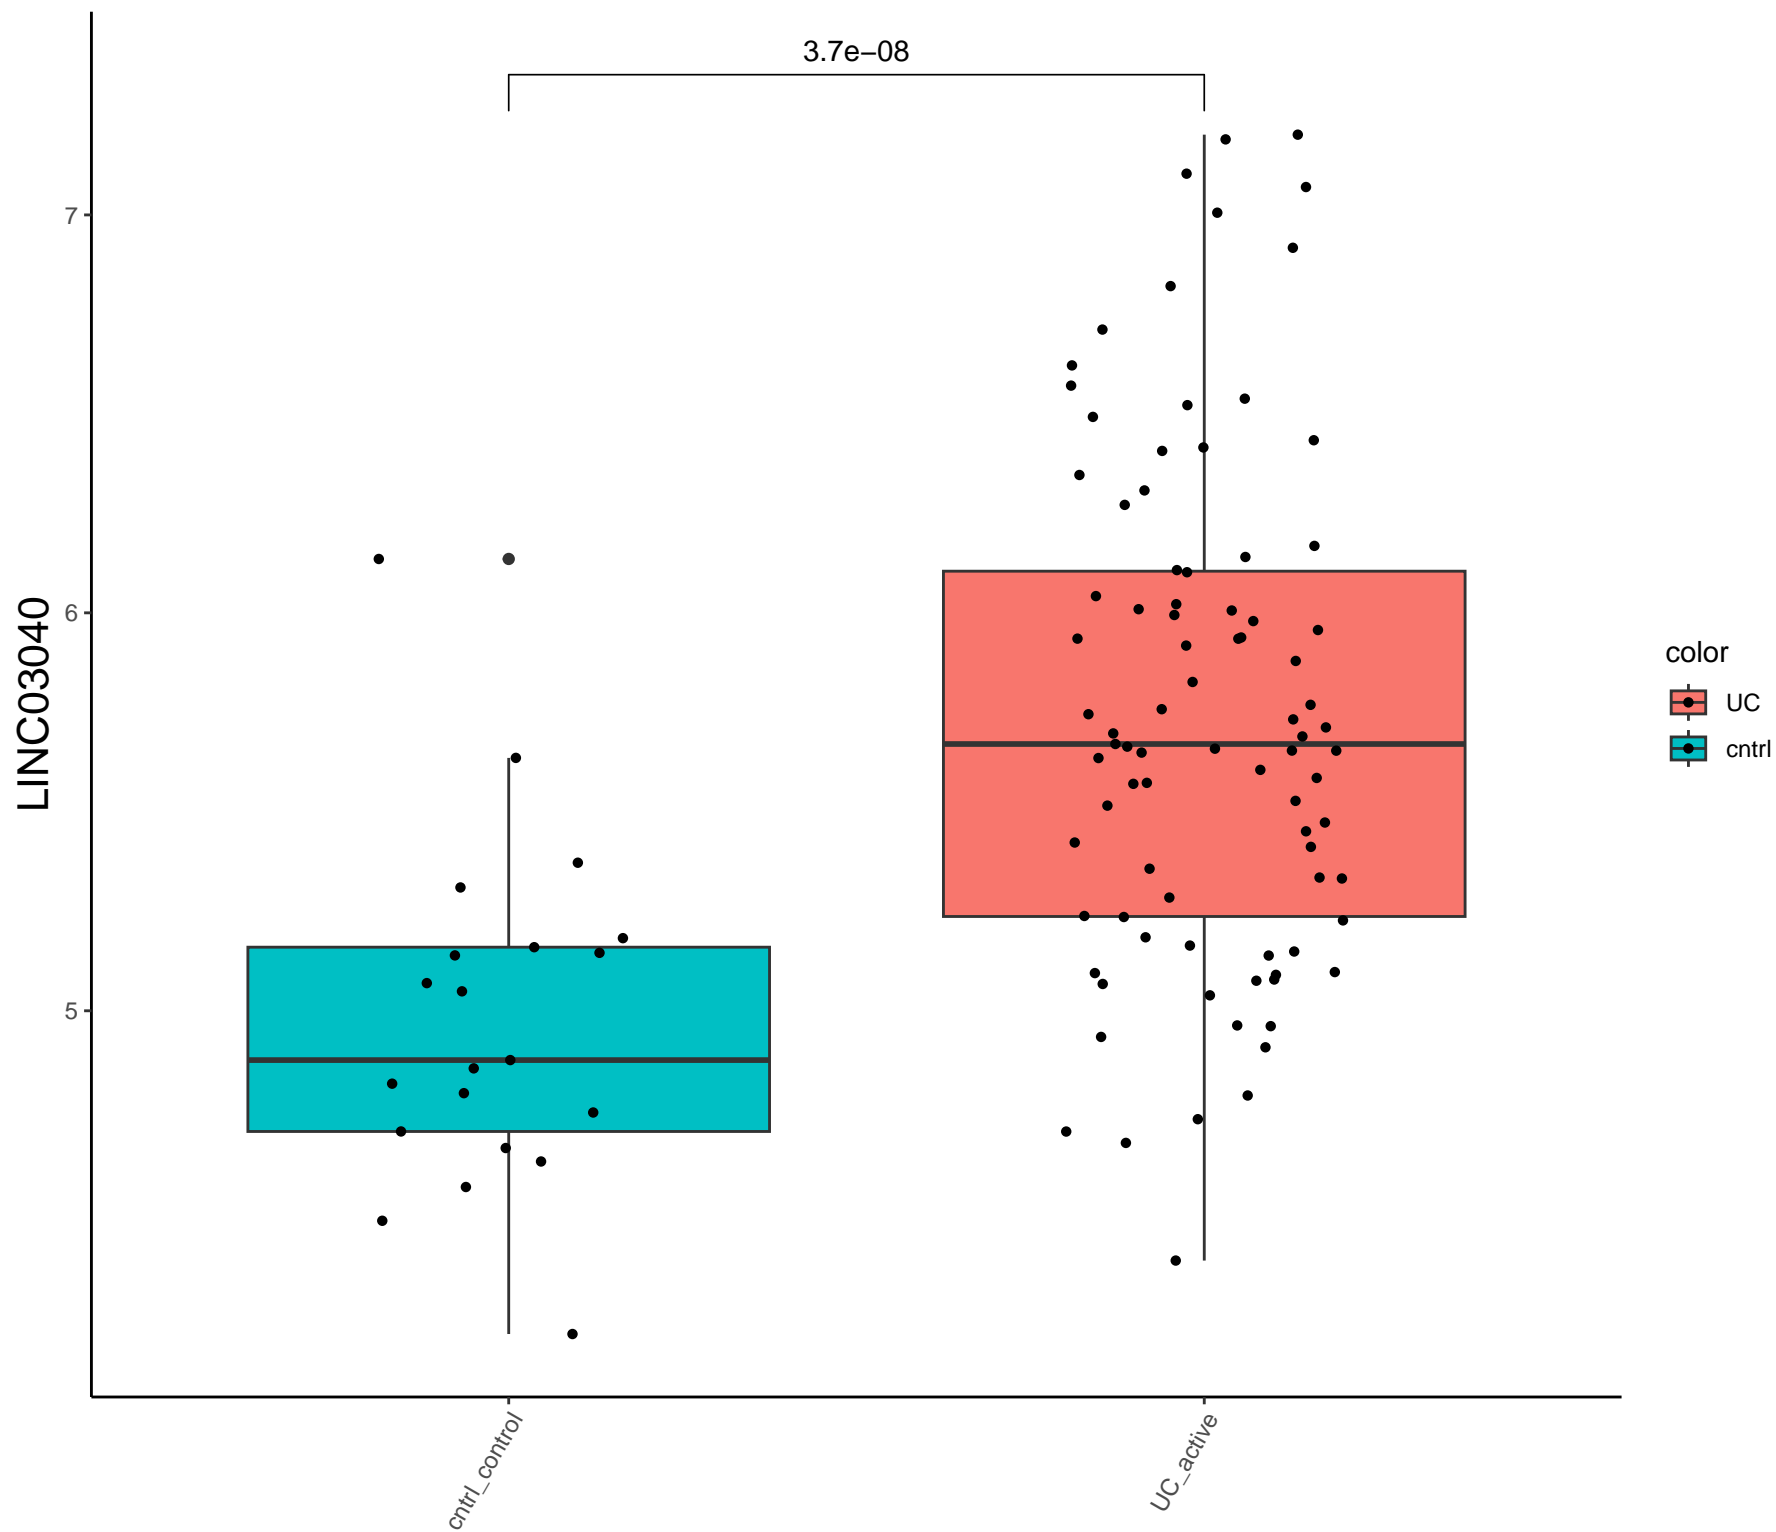

GSE92415

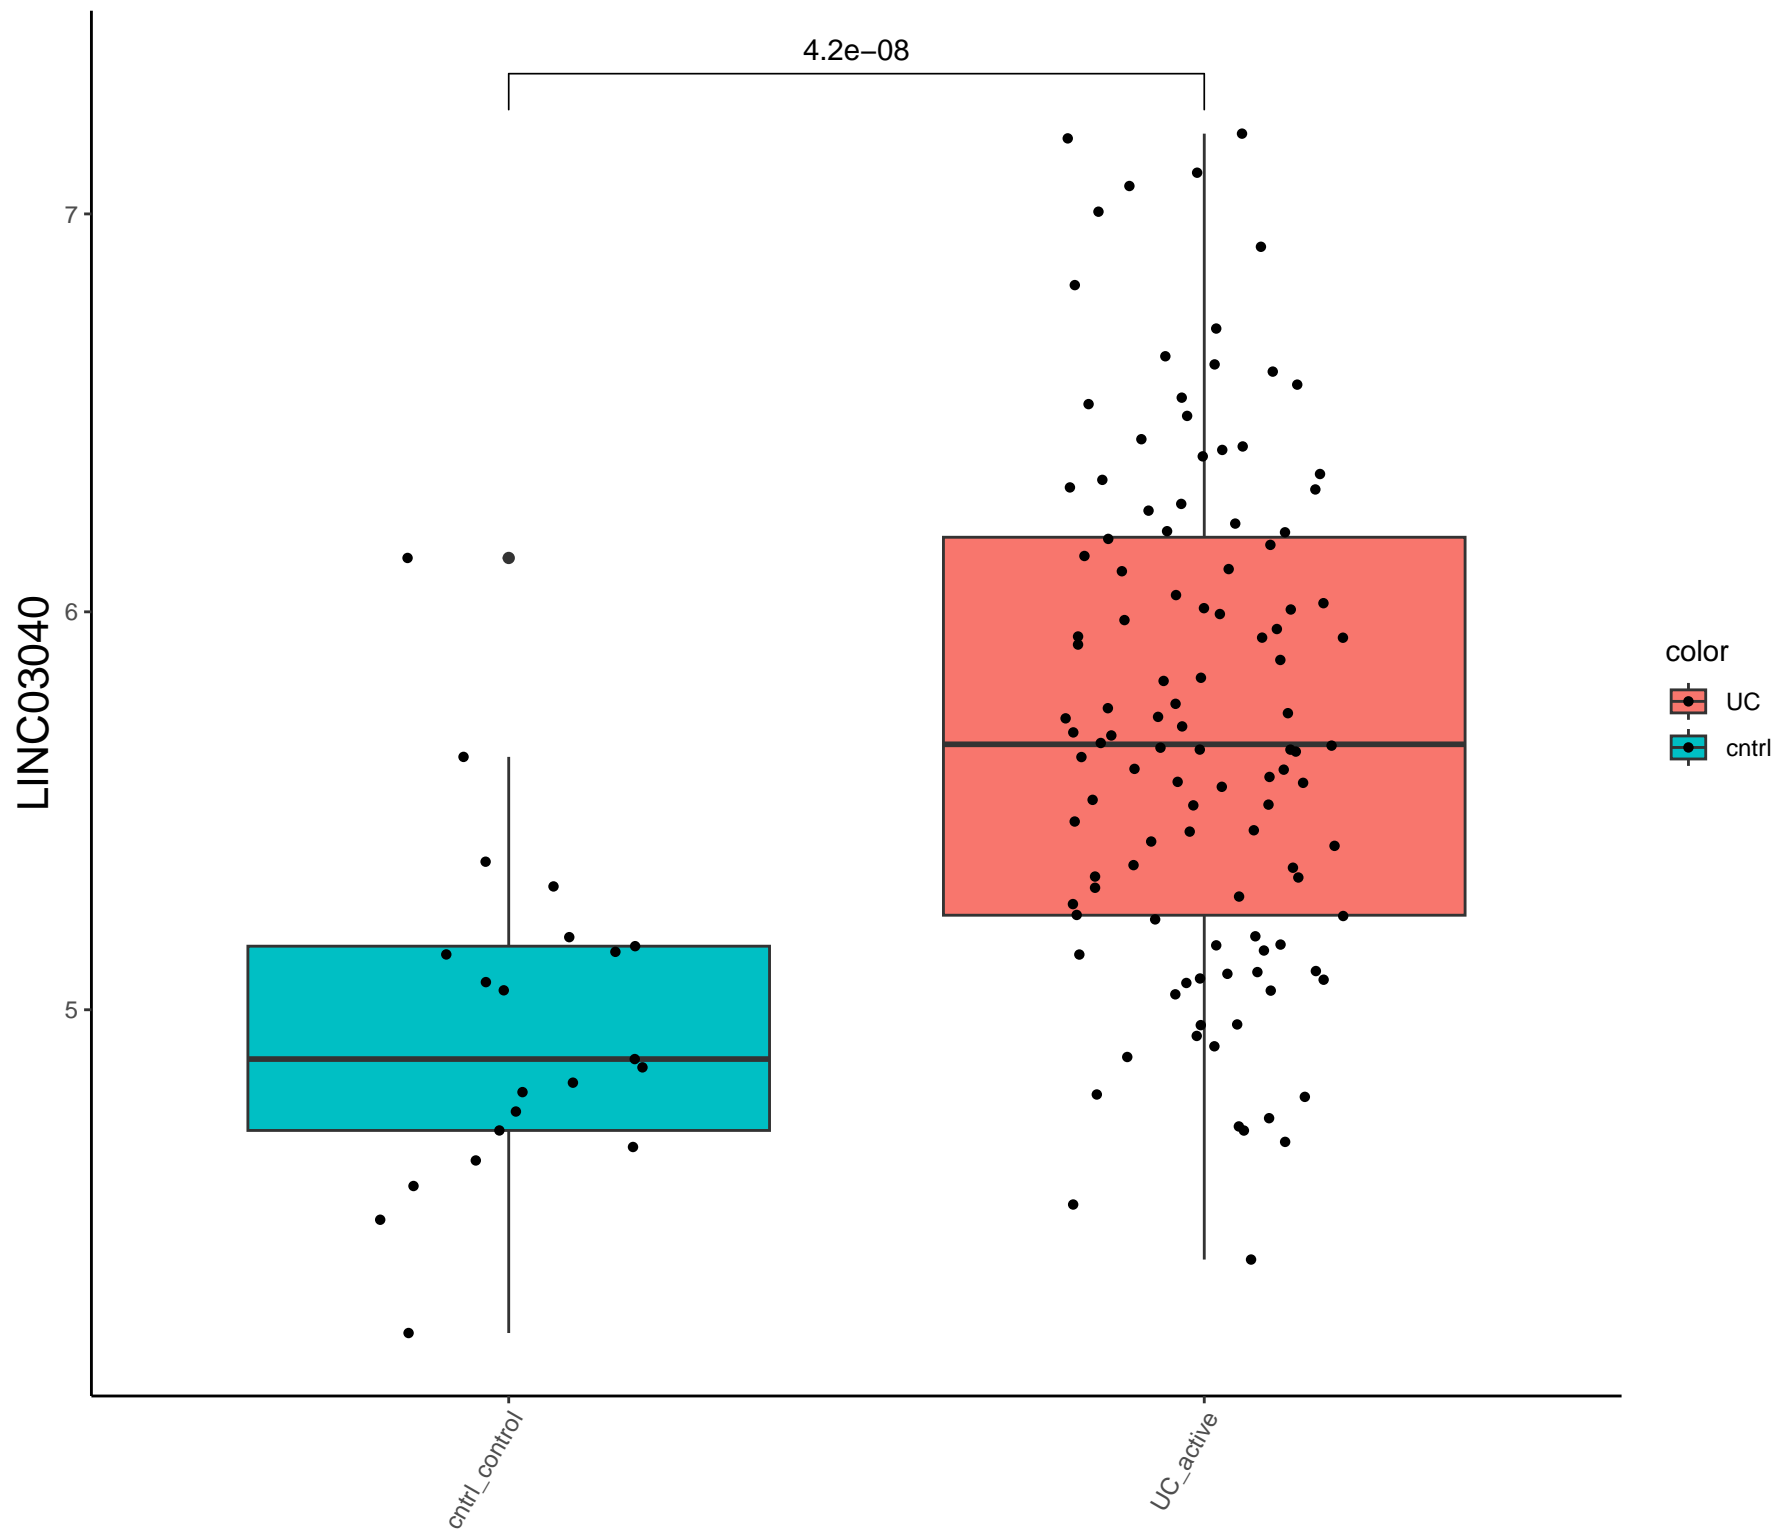



GSE109142

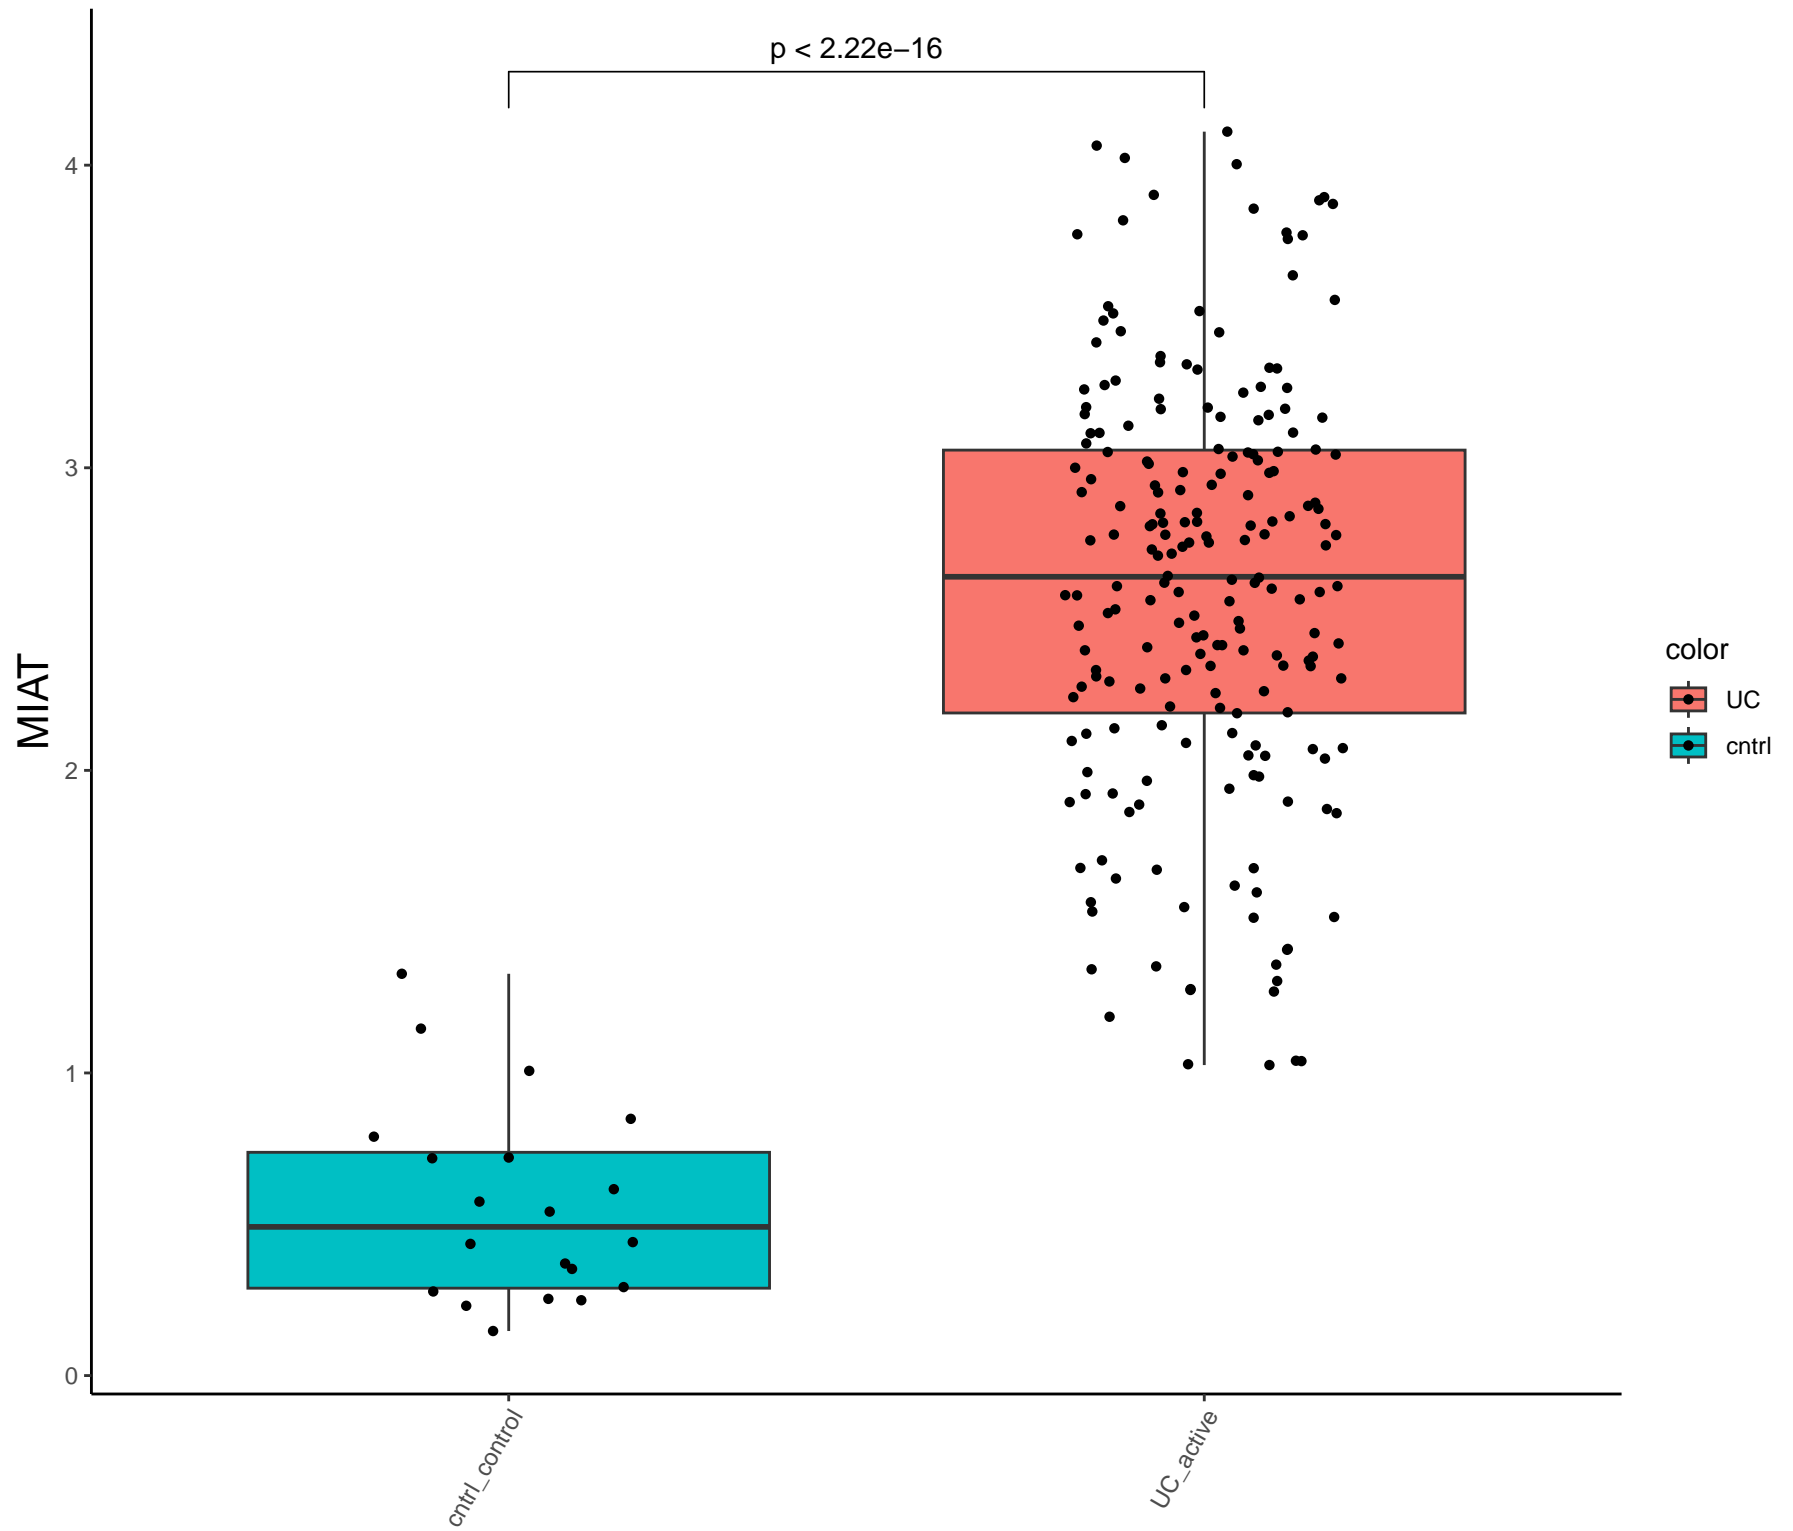

GSE128682

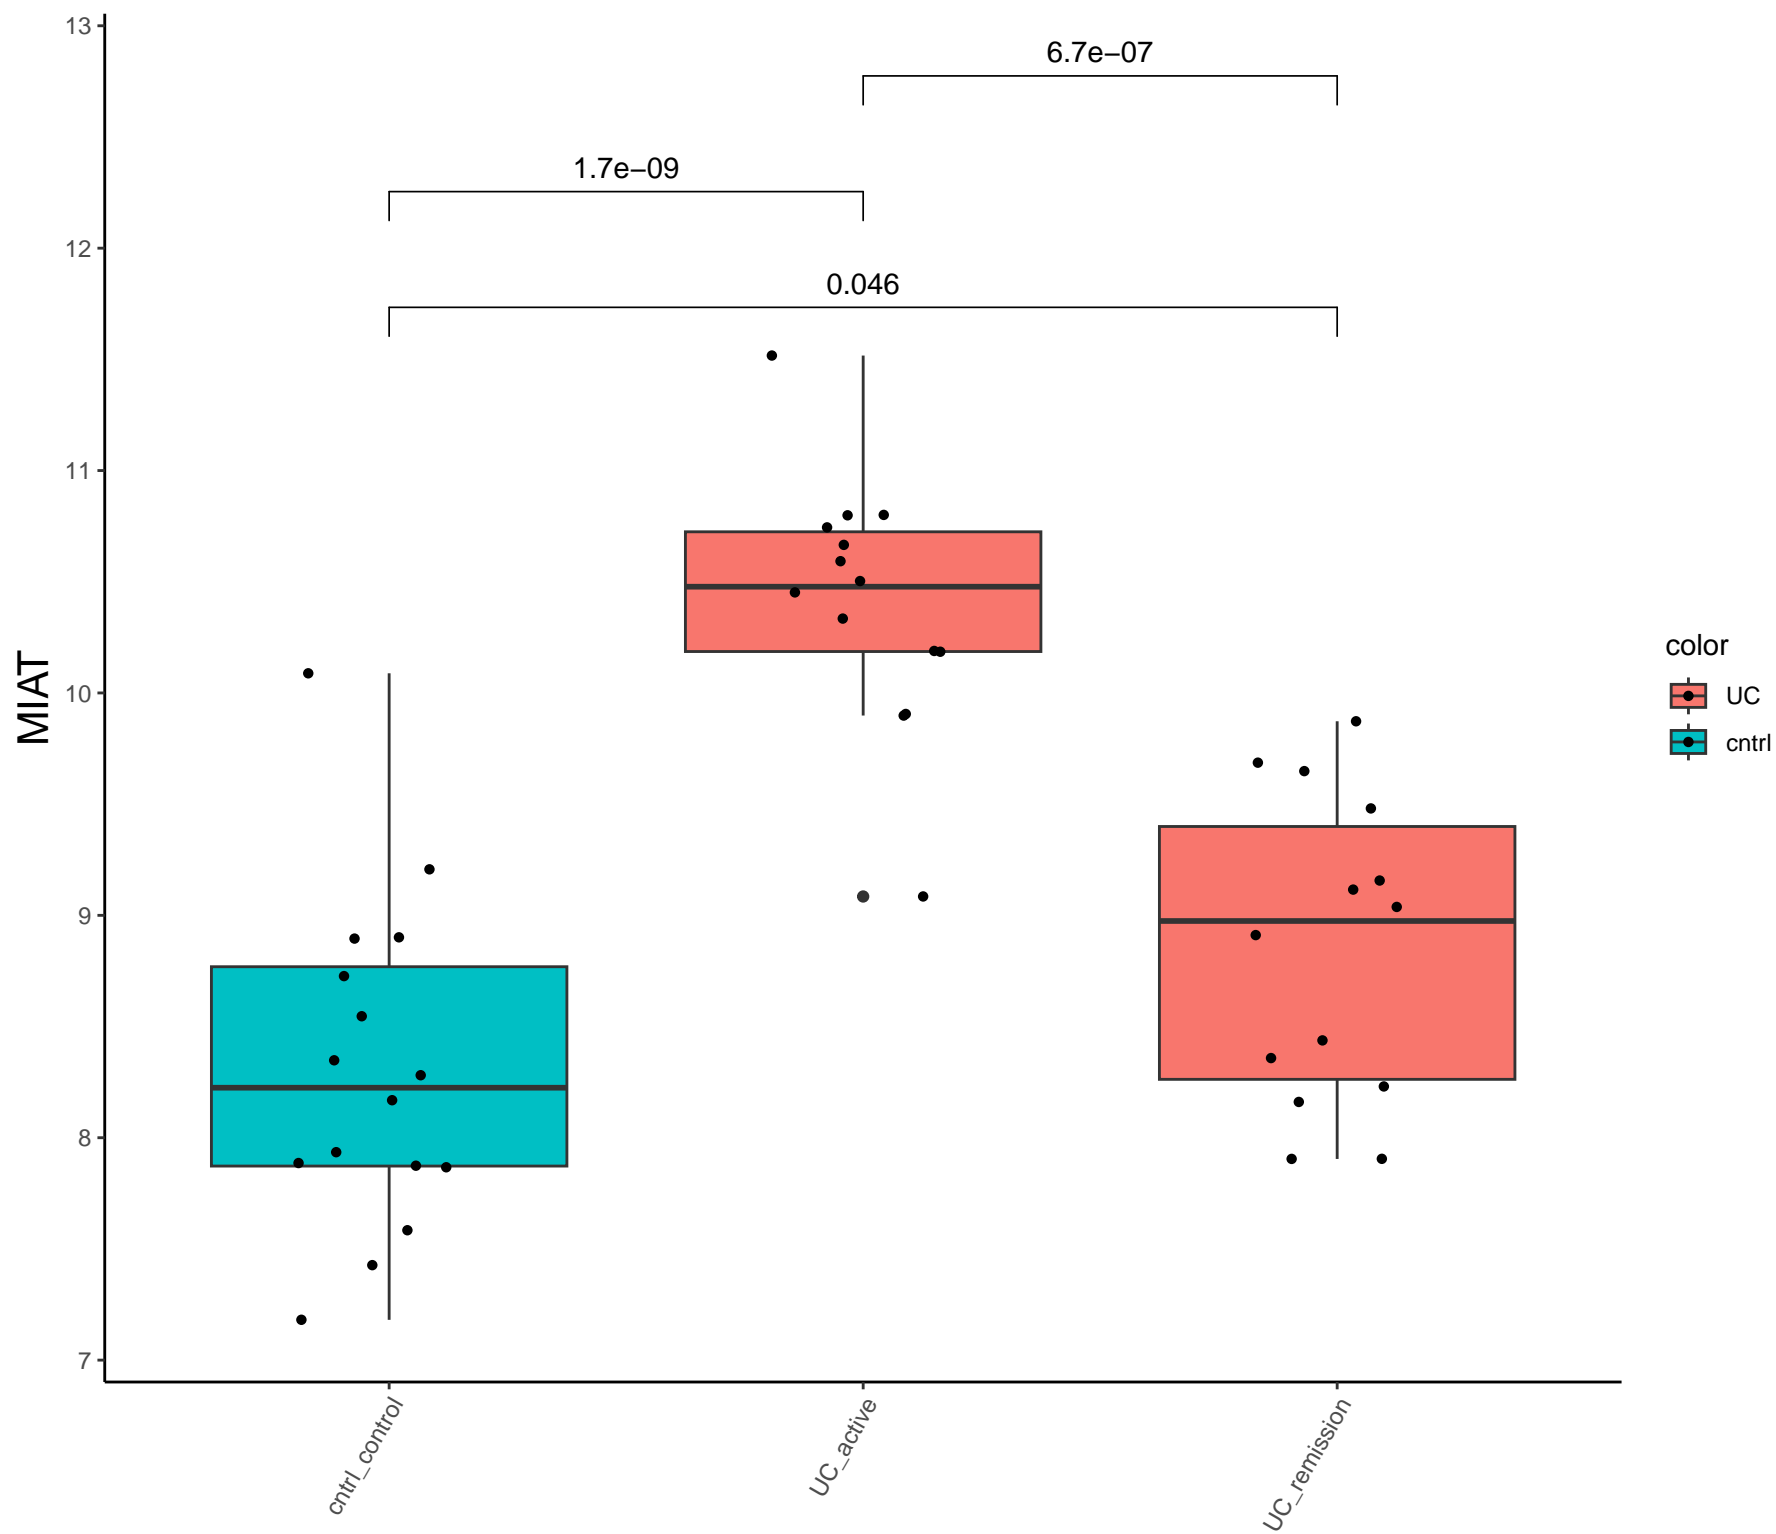

GSE16879

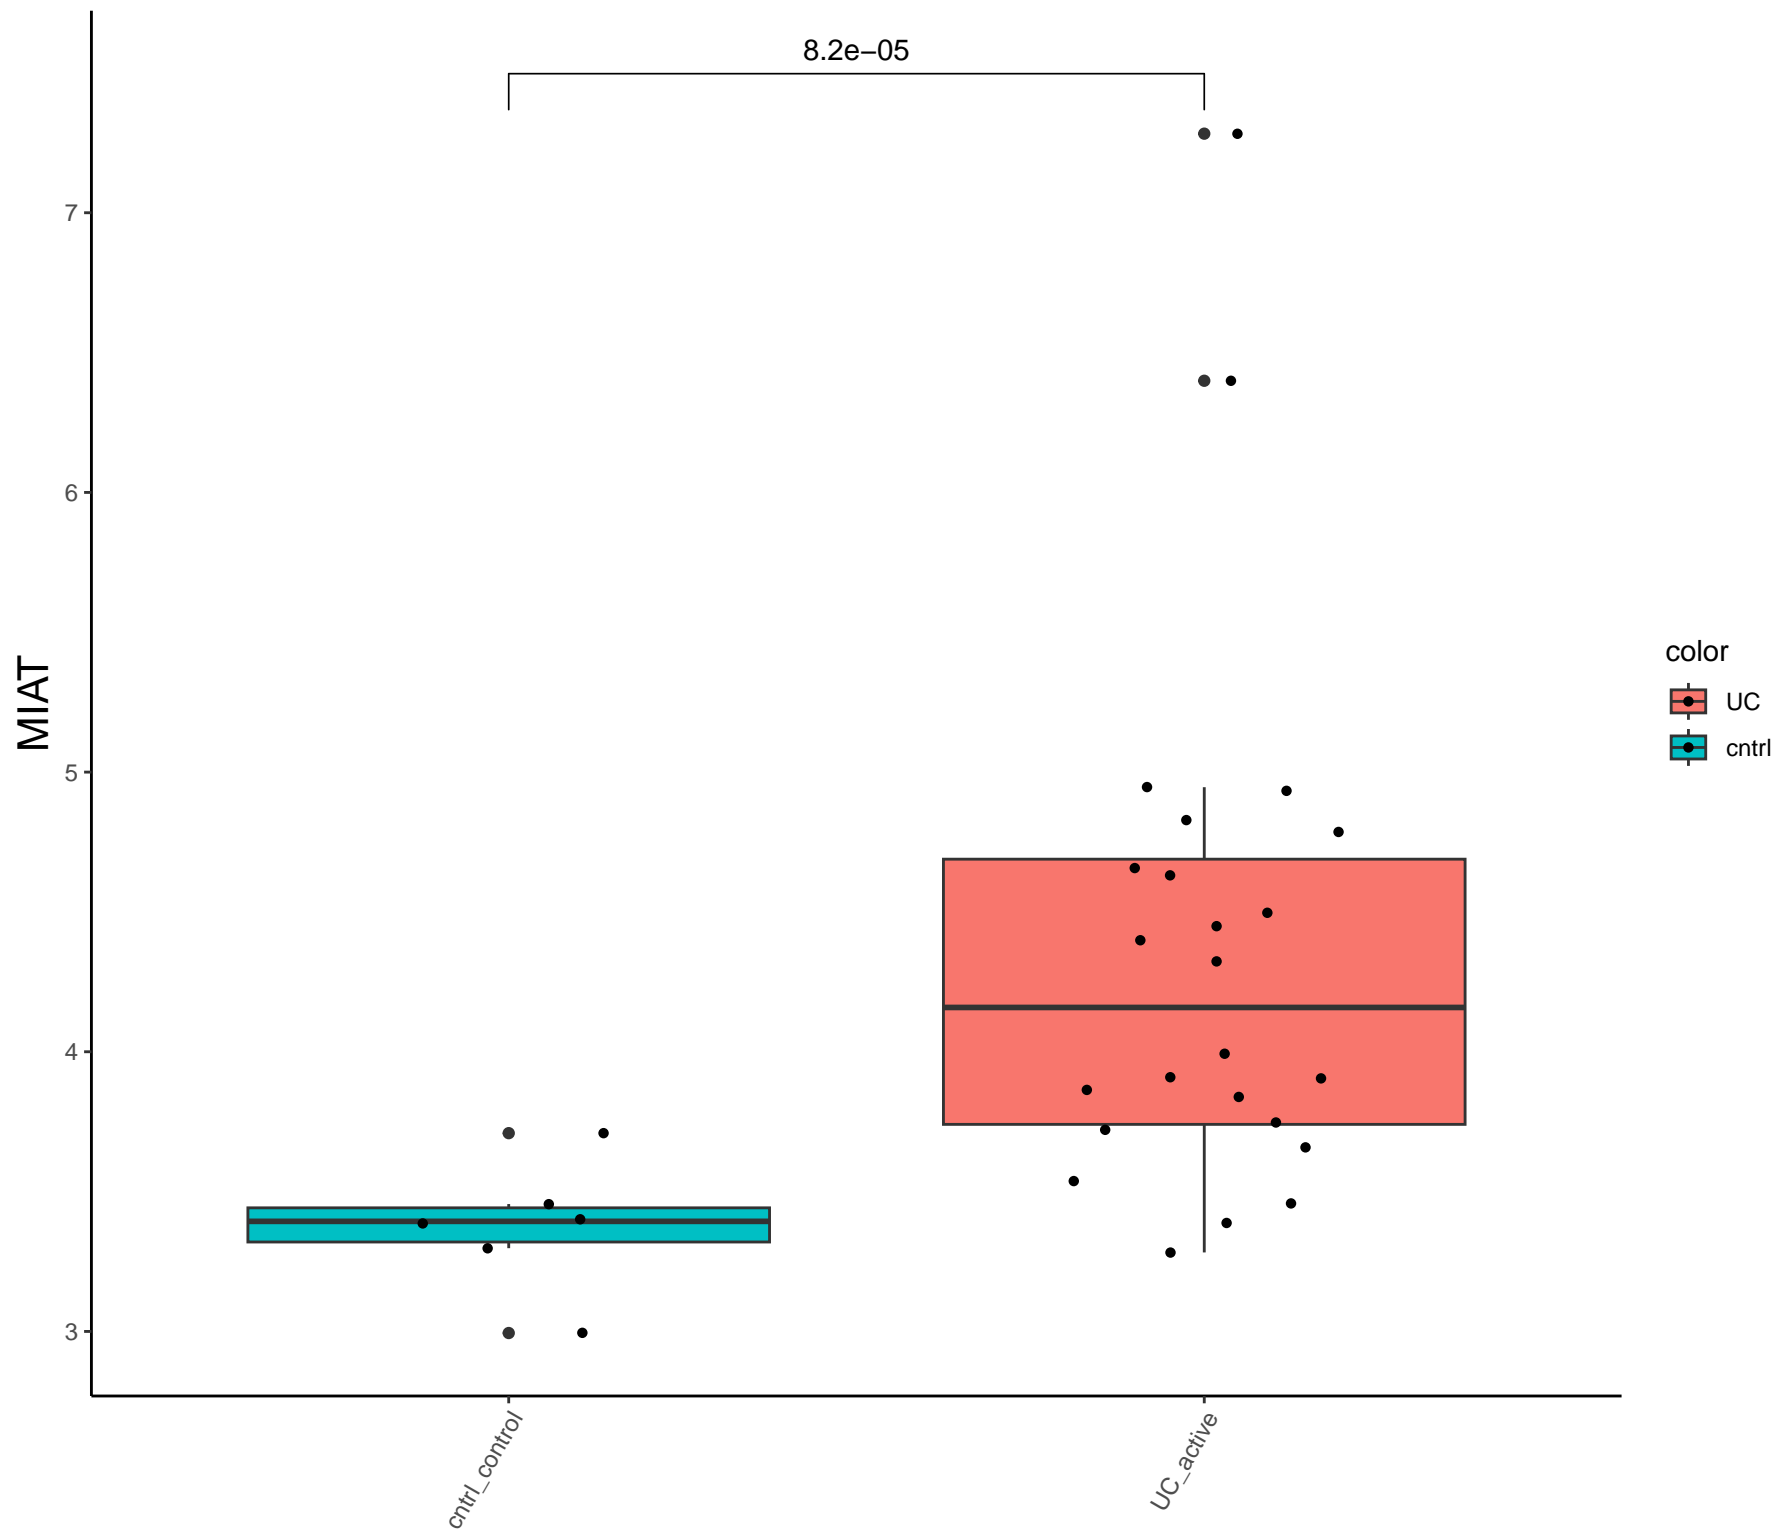

GSE206285

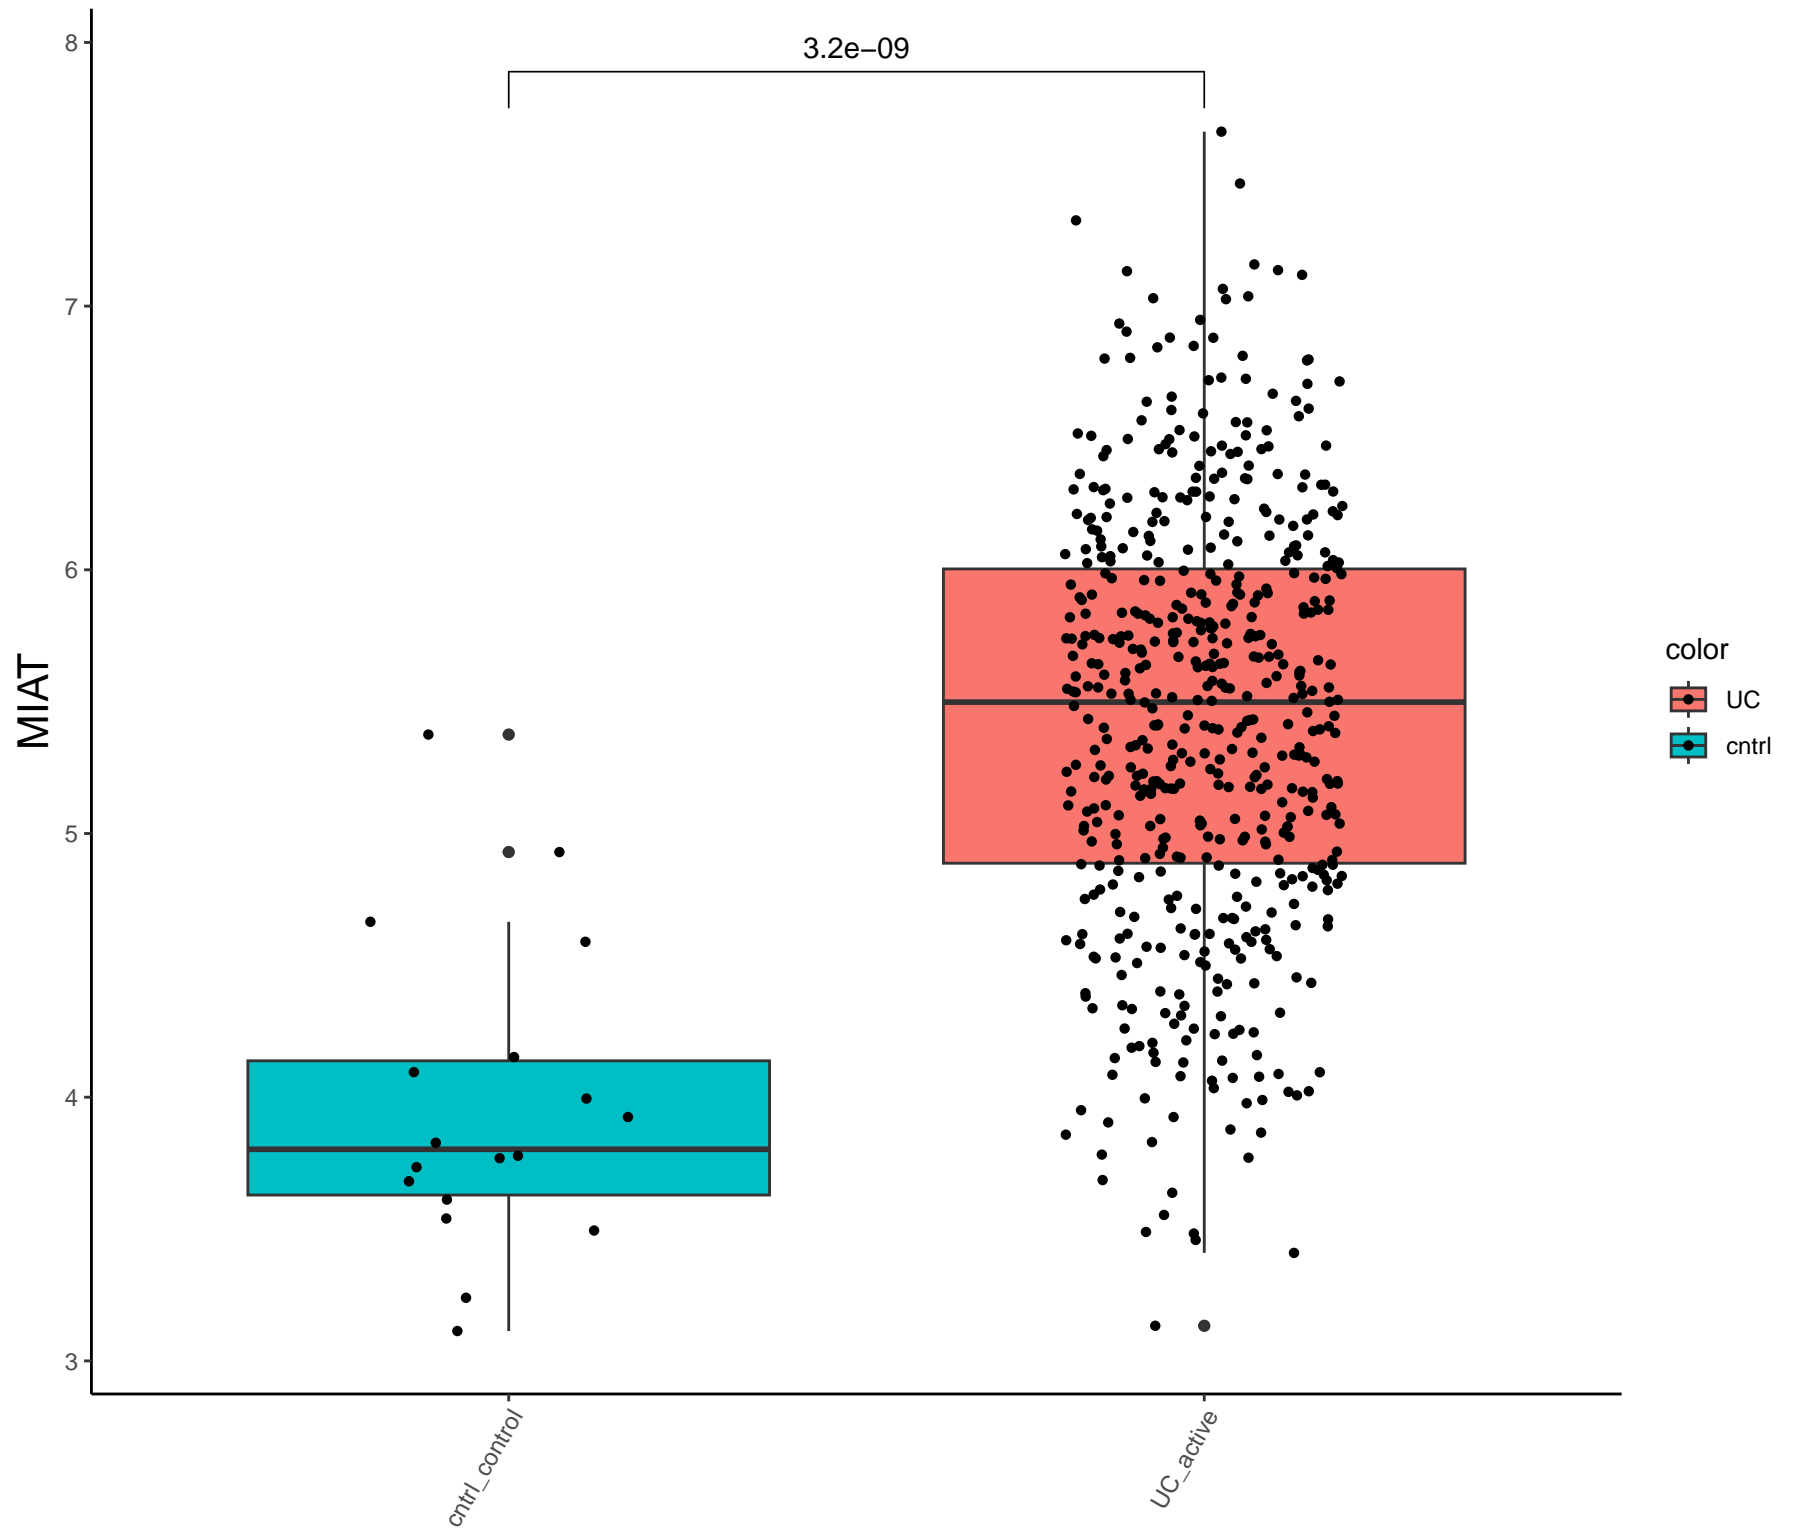

GSE47908

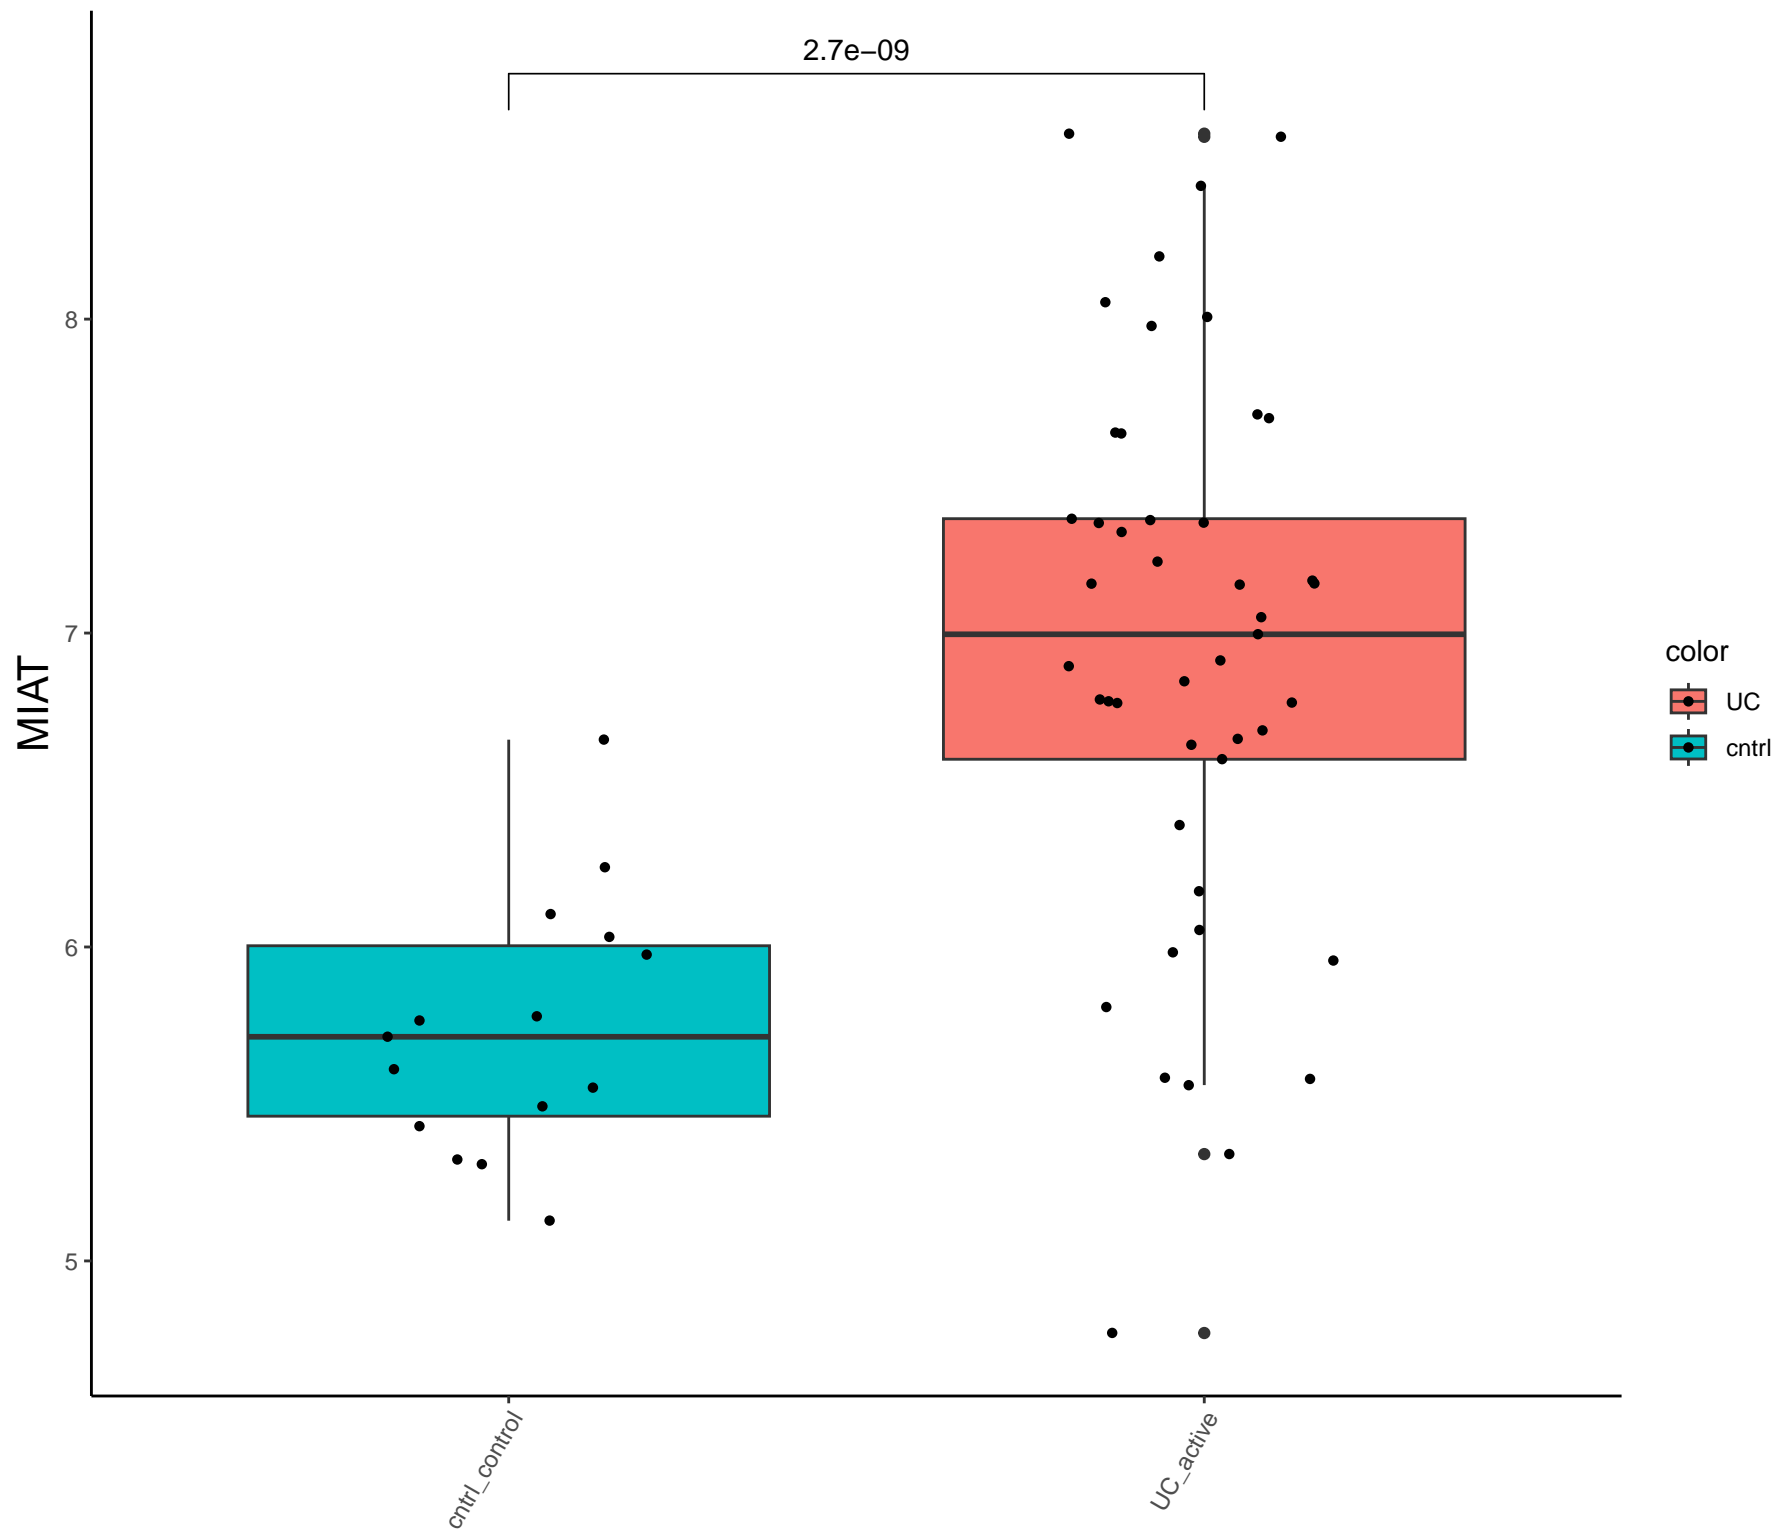

GSE87466

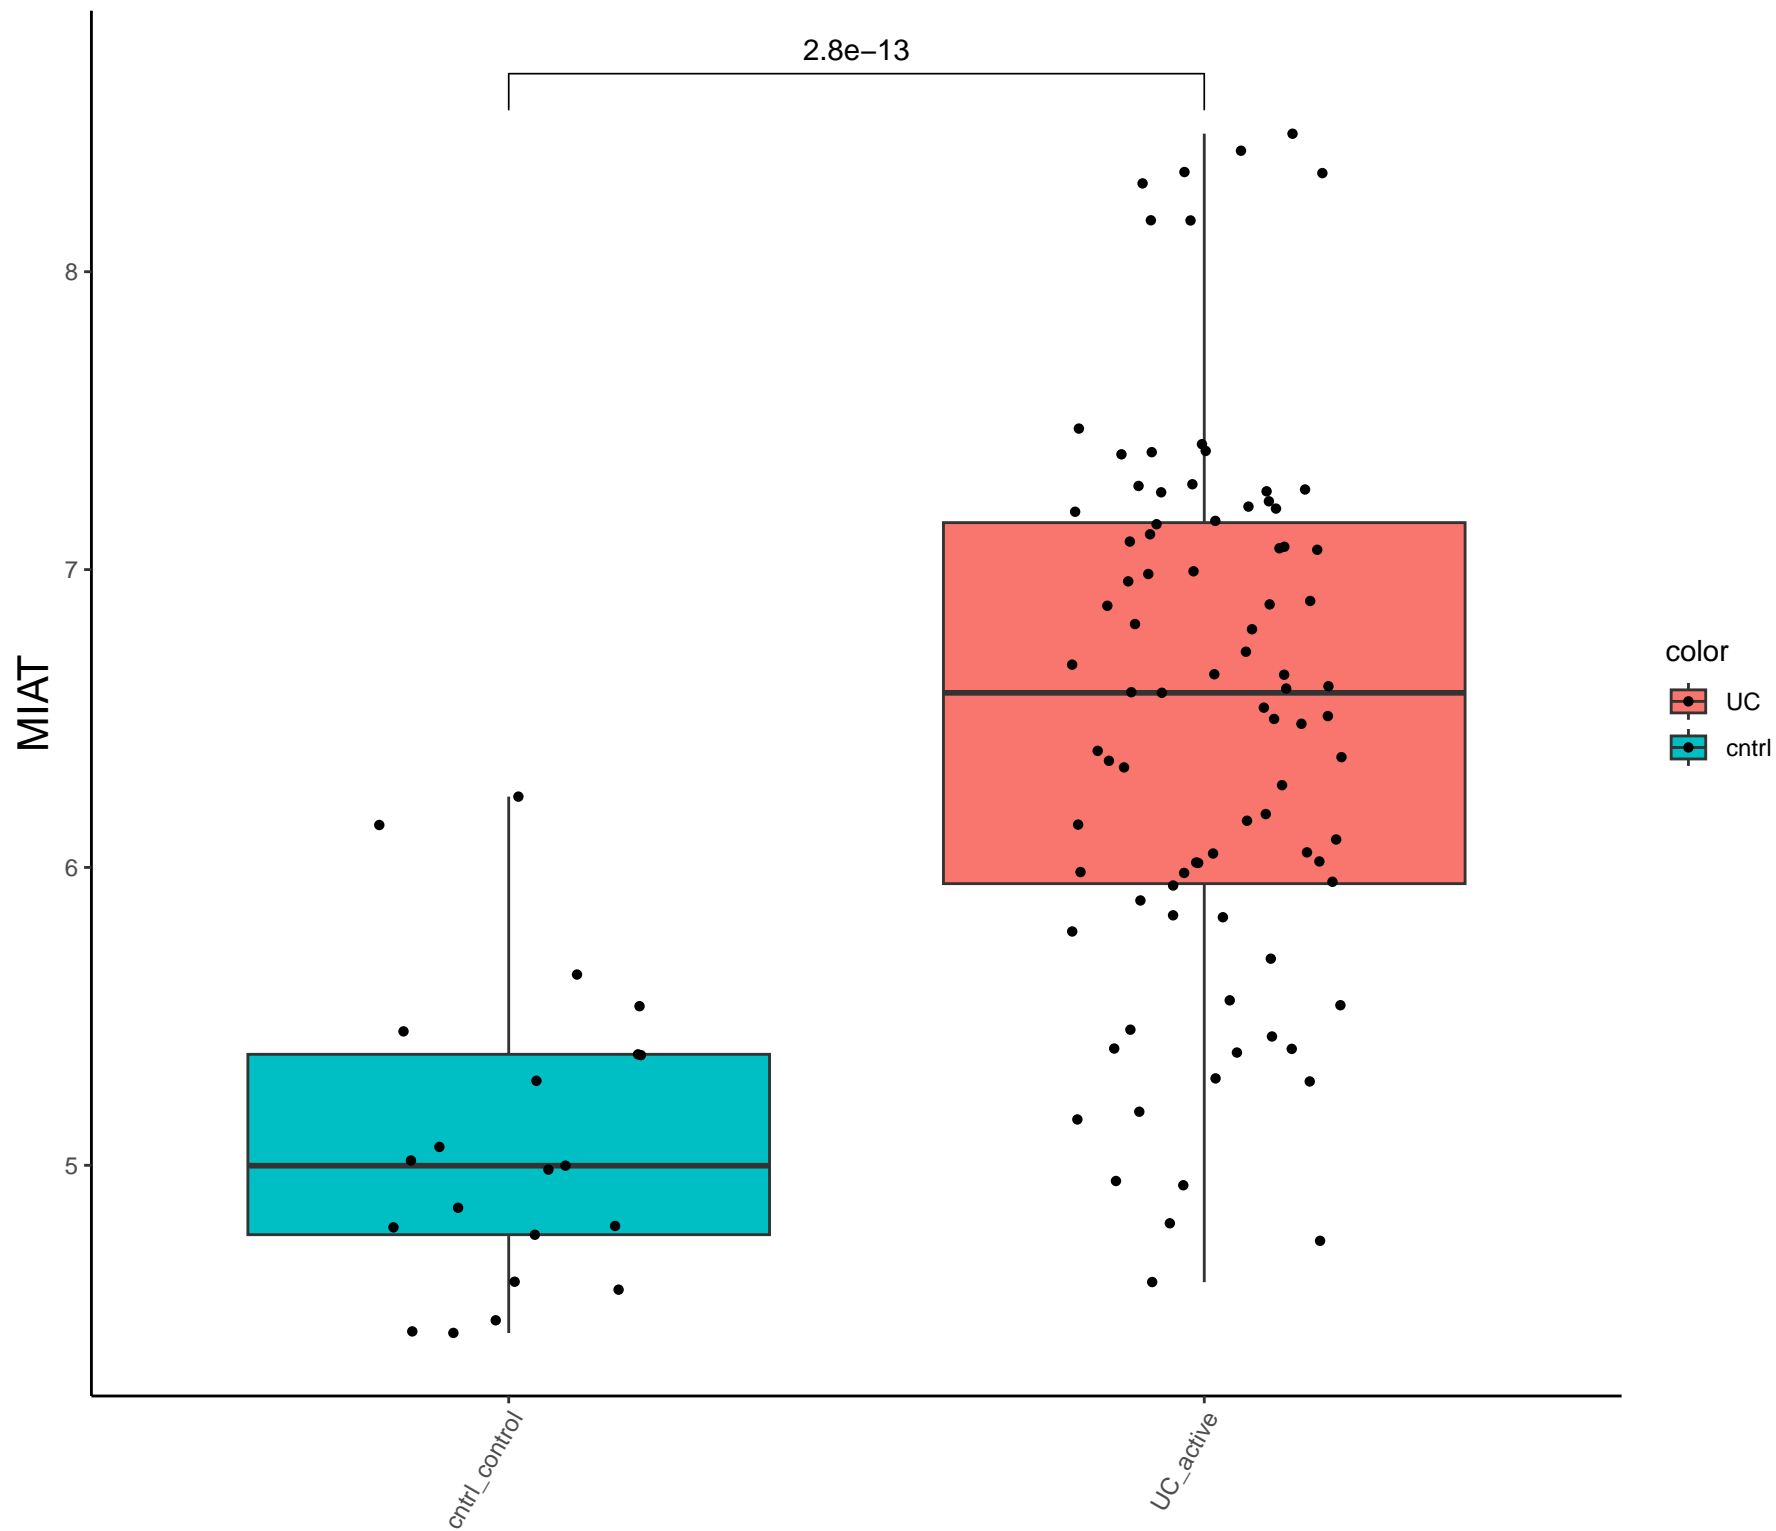

GSE92415

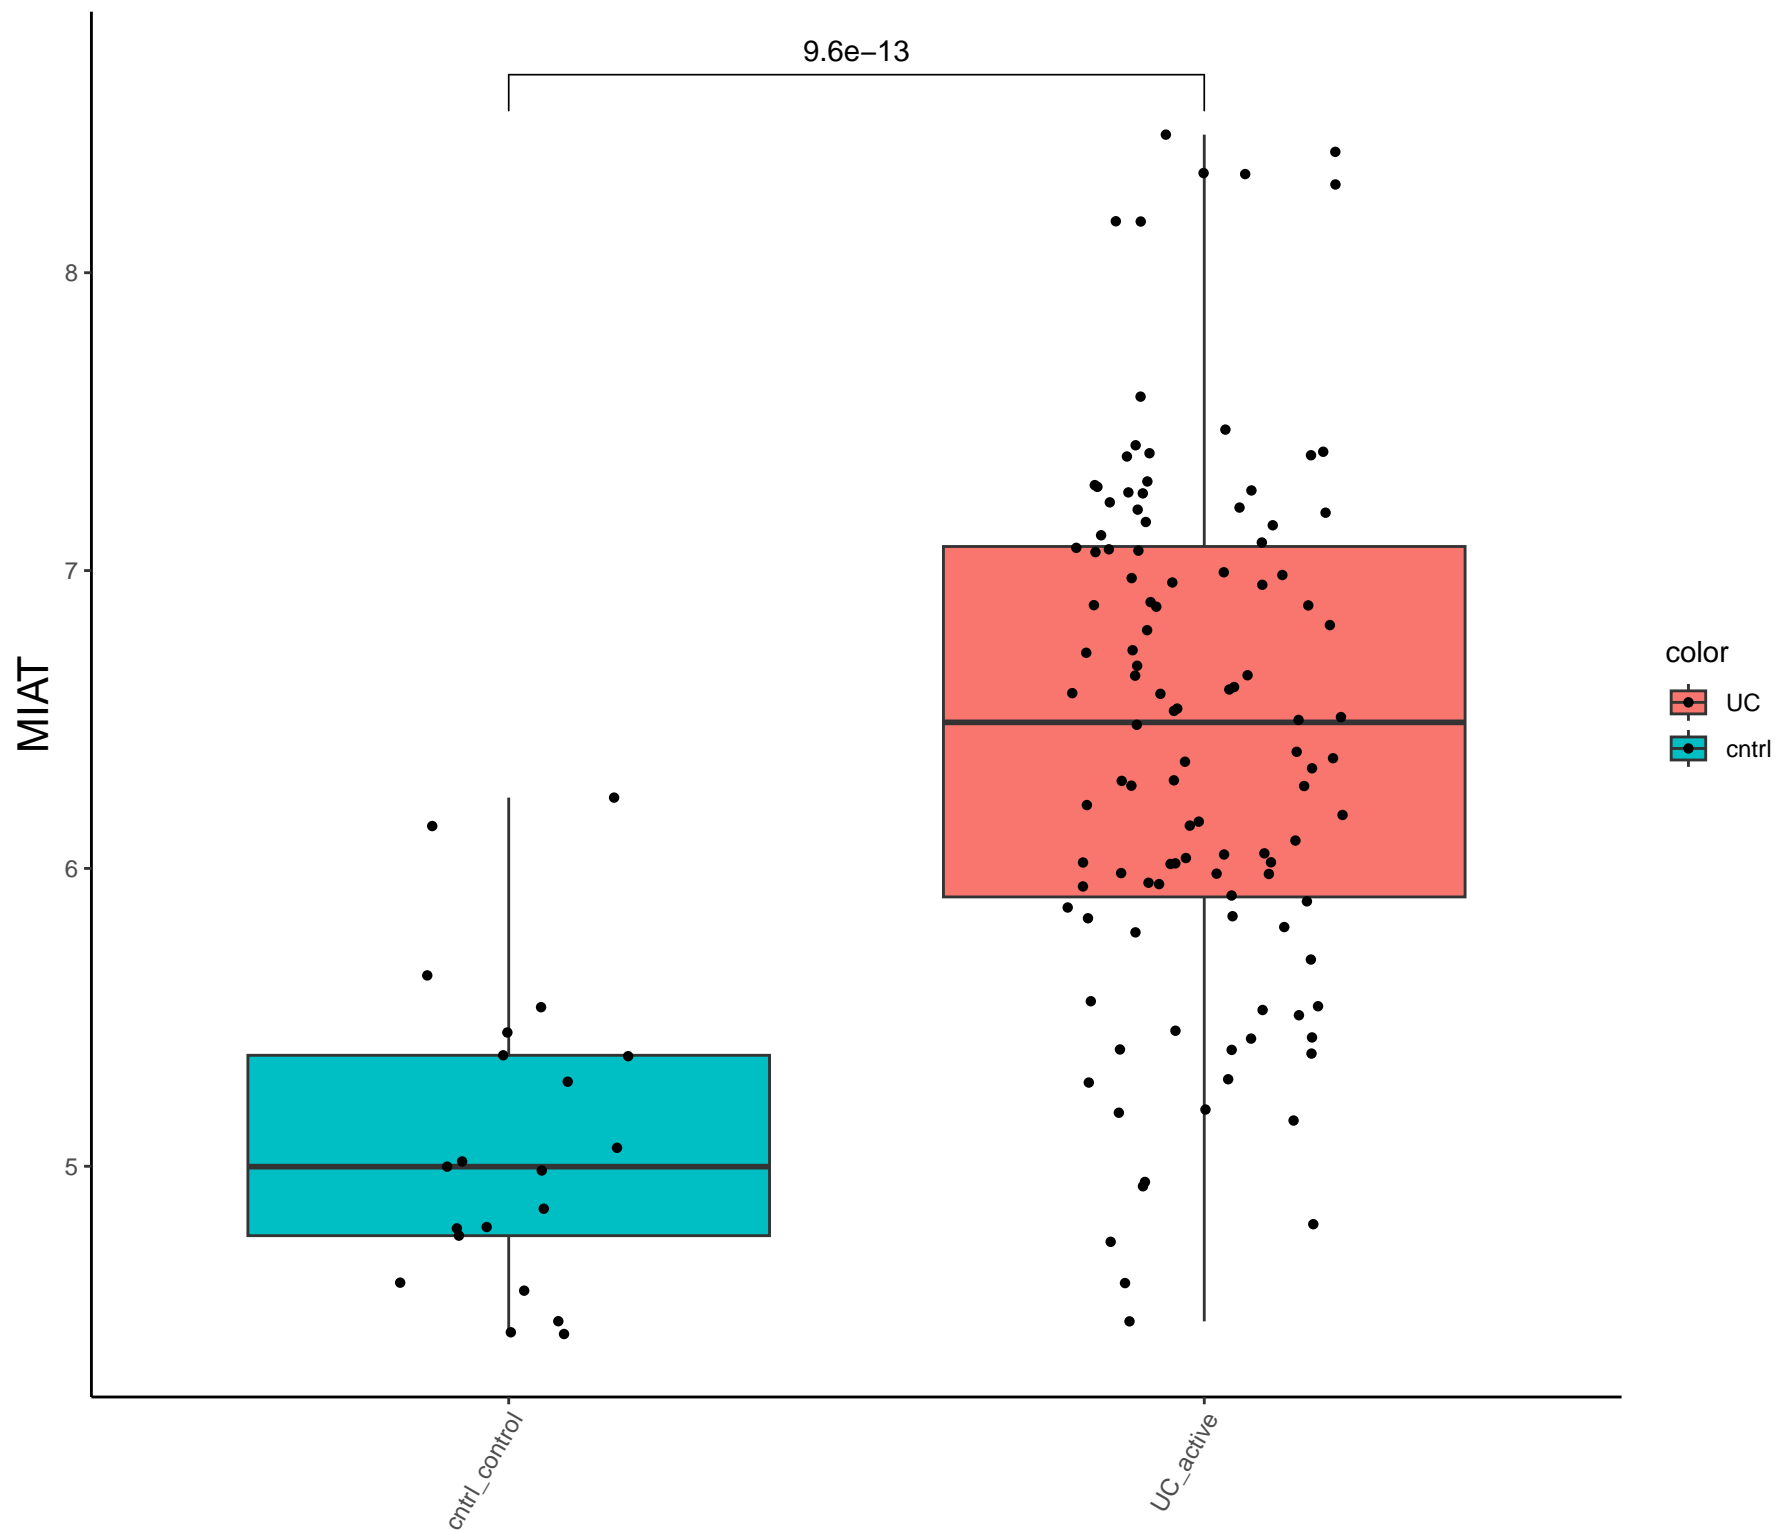

GSE109142

MIR155HG

$p < 2.22e-16$

color

UC

cntrl

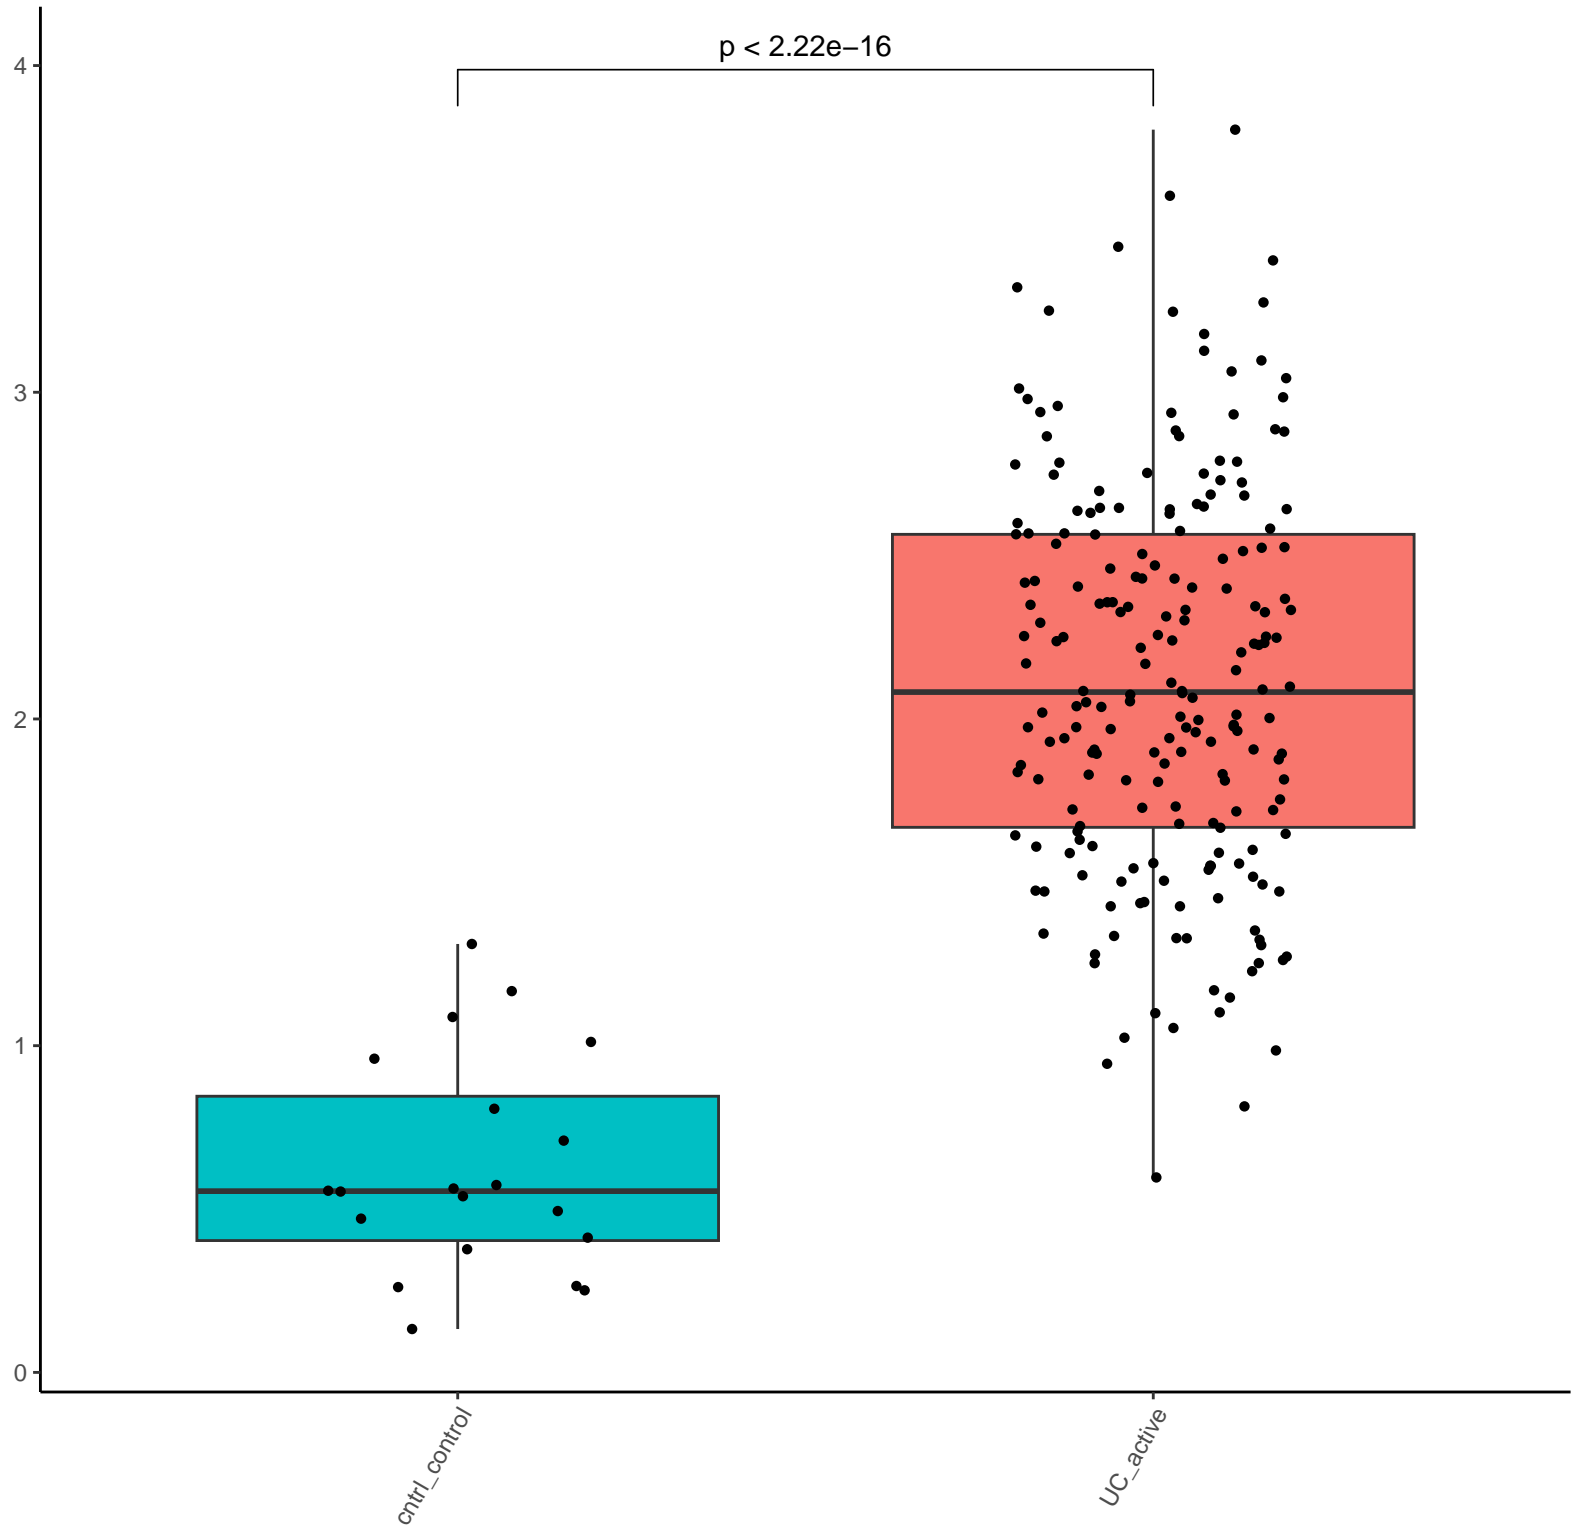



GSE128682

MIR155HG

$3.5 \times 10^{-5}$

$2.9 \times 10^{-8}$

0.086

color

UC  
cntrl

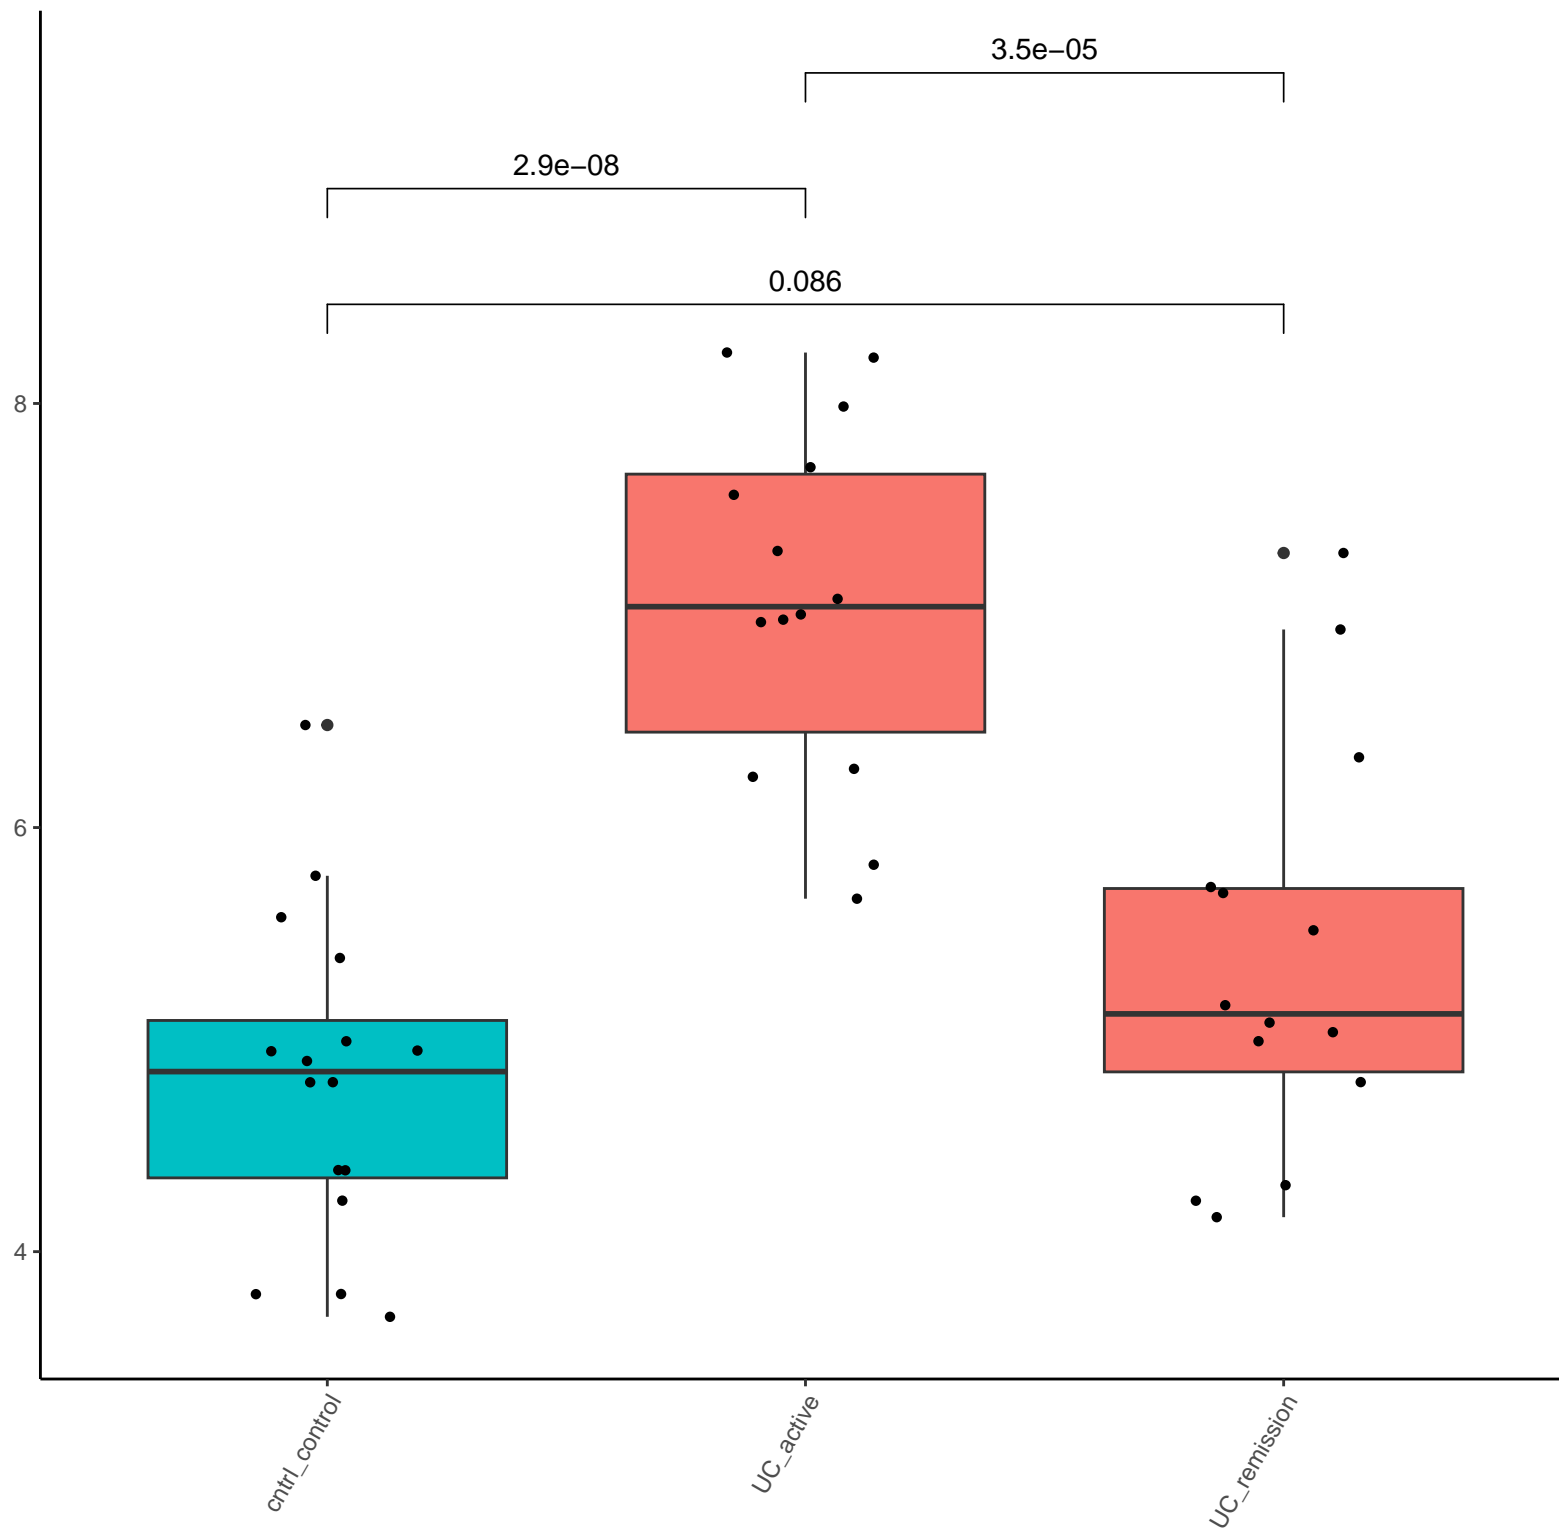

GSE47908

MIR155HG

0.00015

color

UC  
cntrl

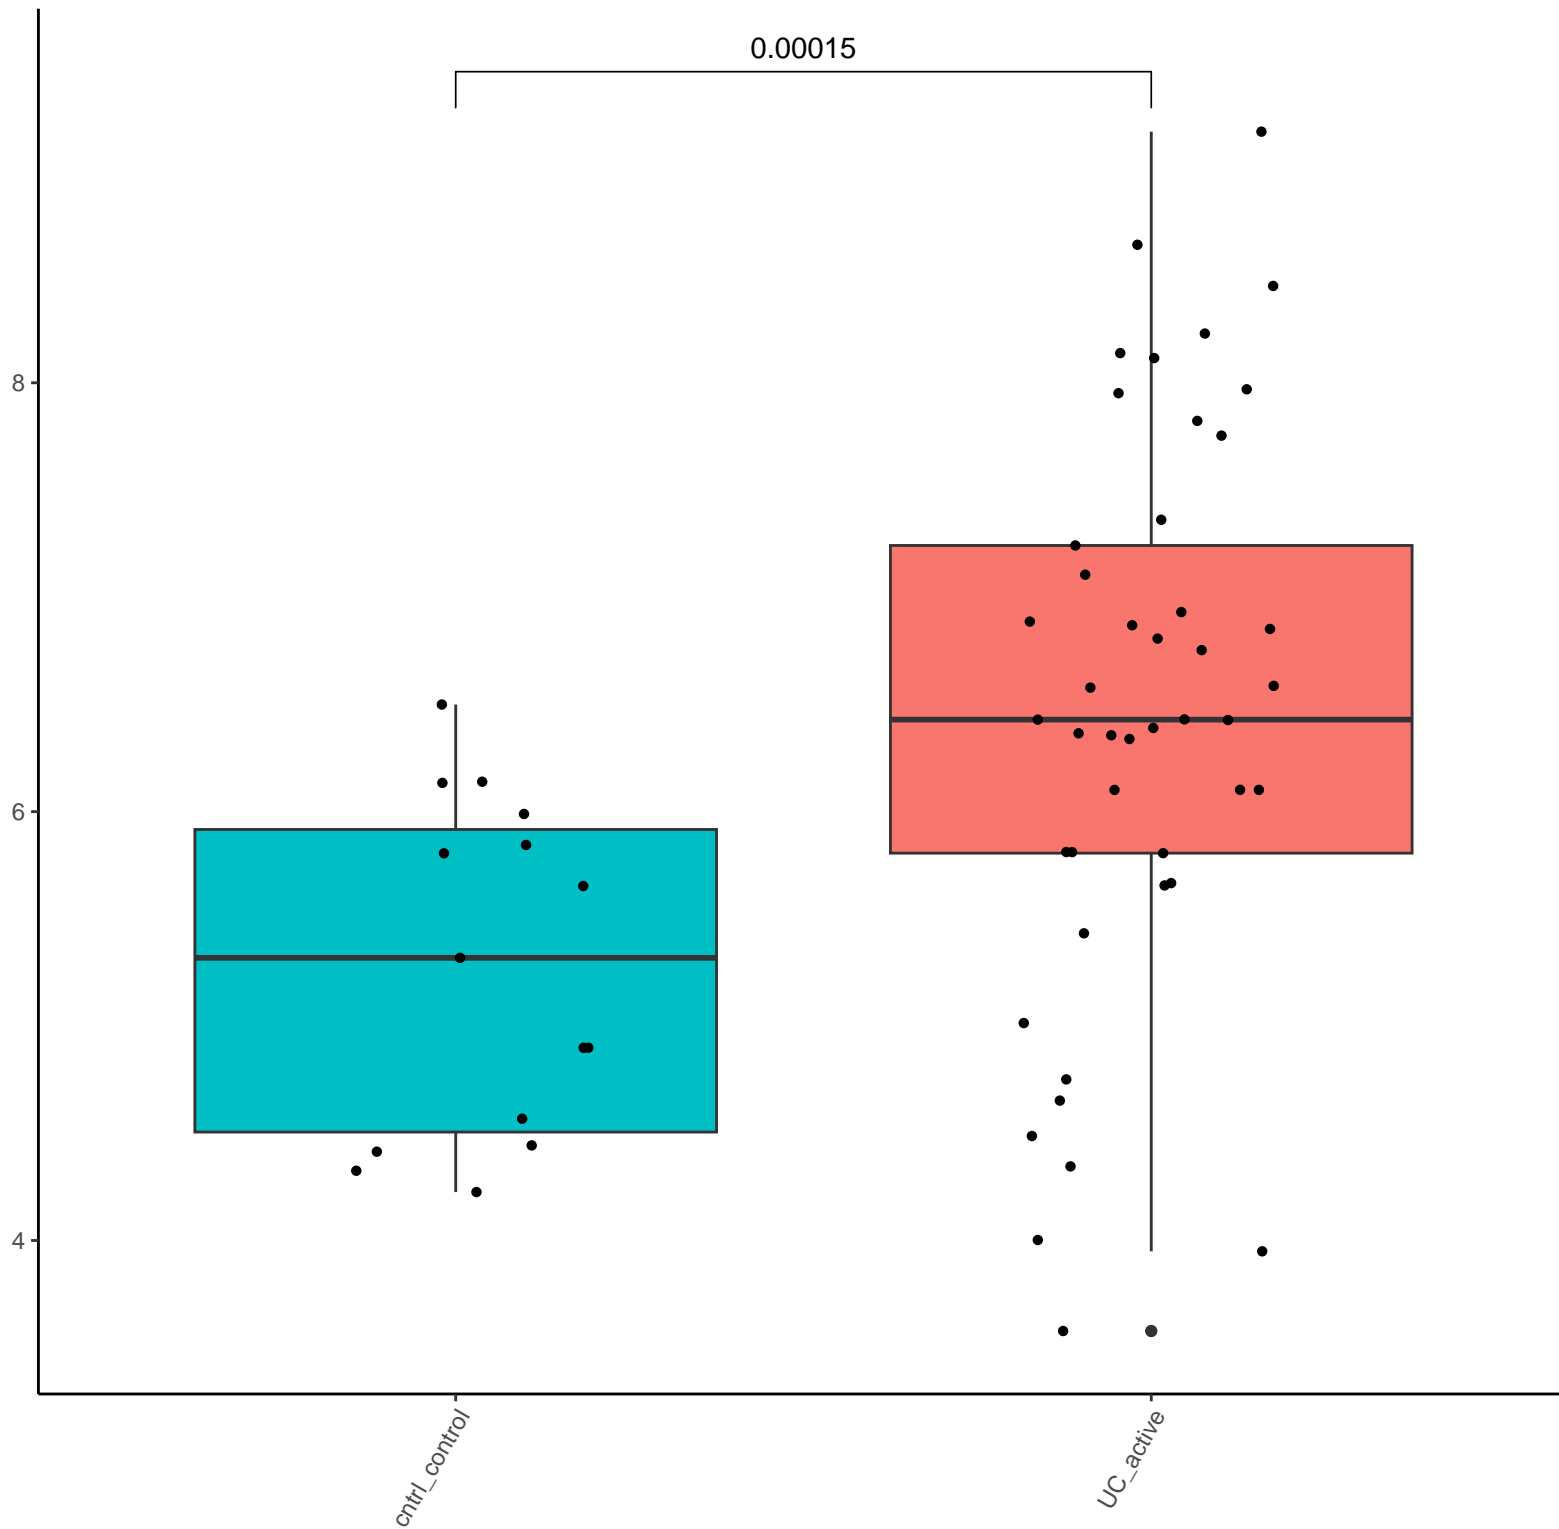

GSE92415

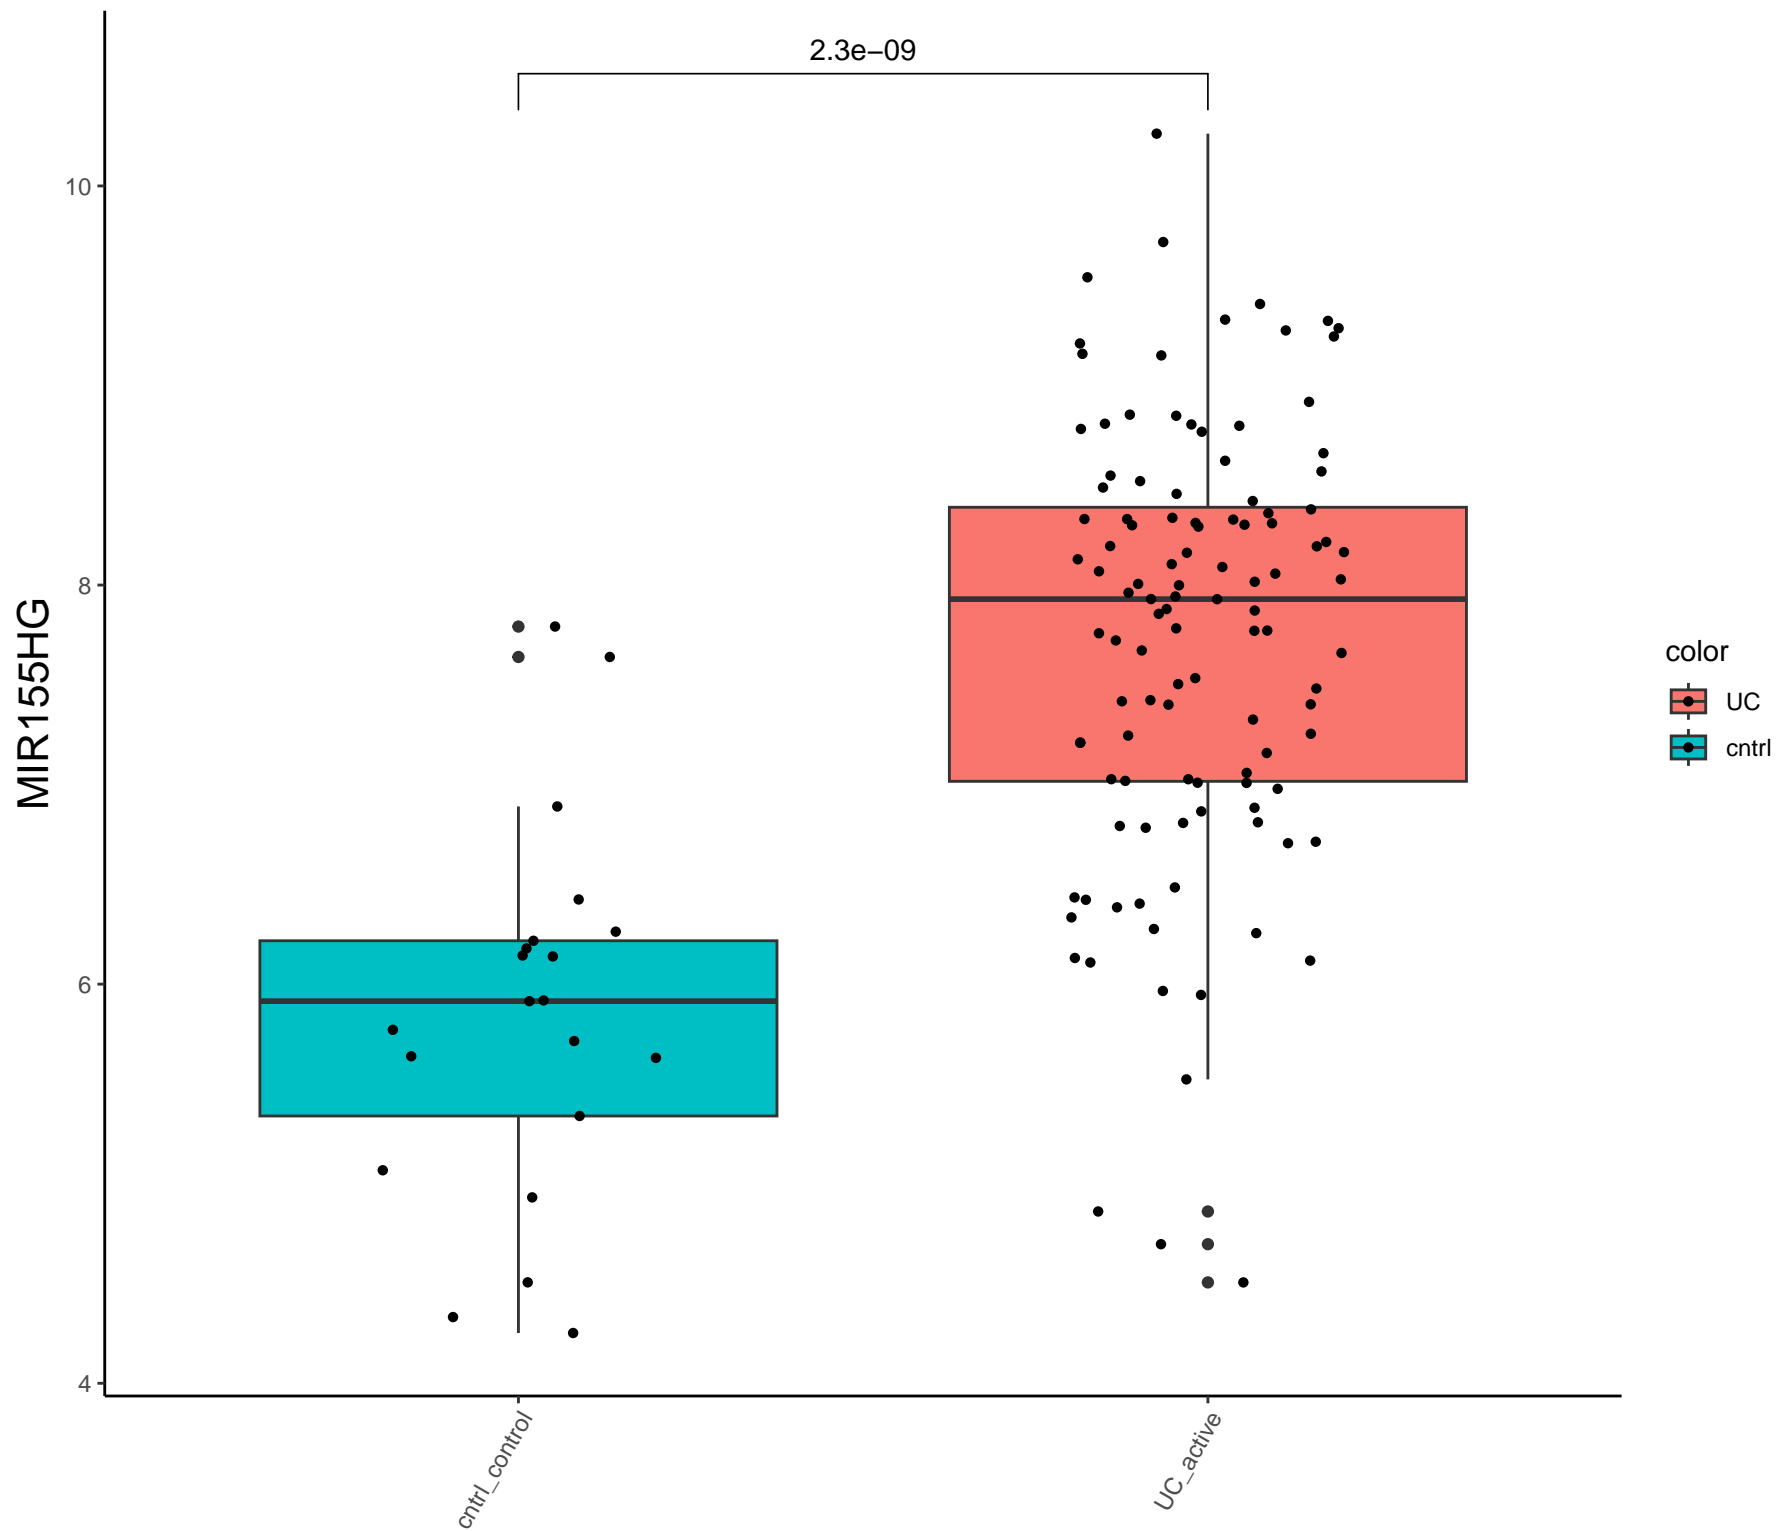

GSE109142

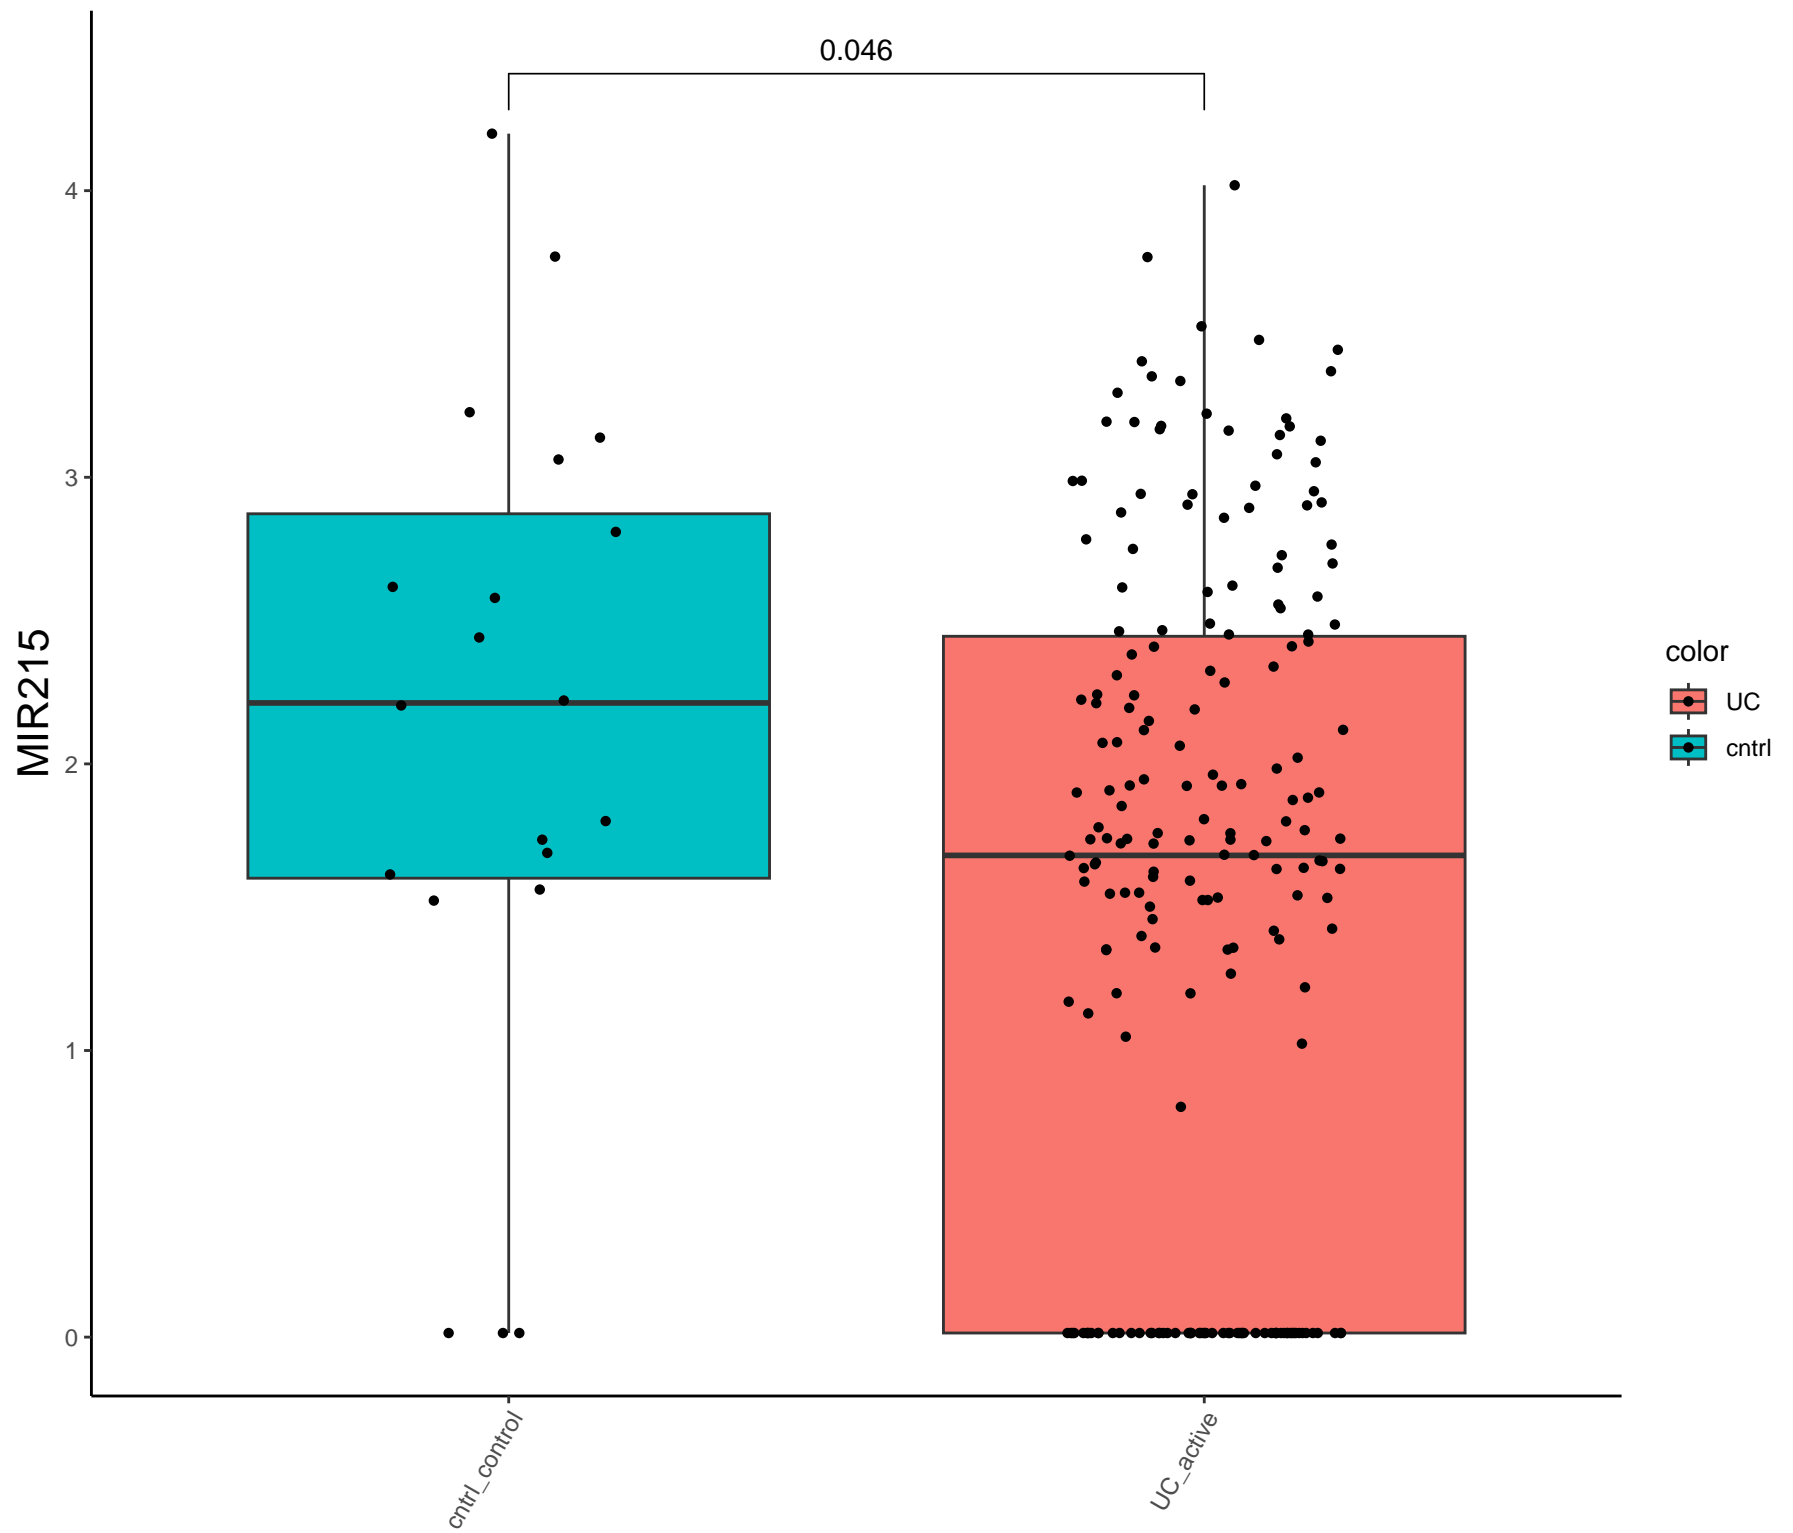

GSE128682

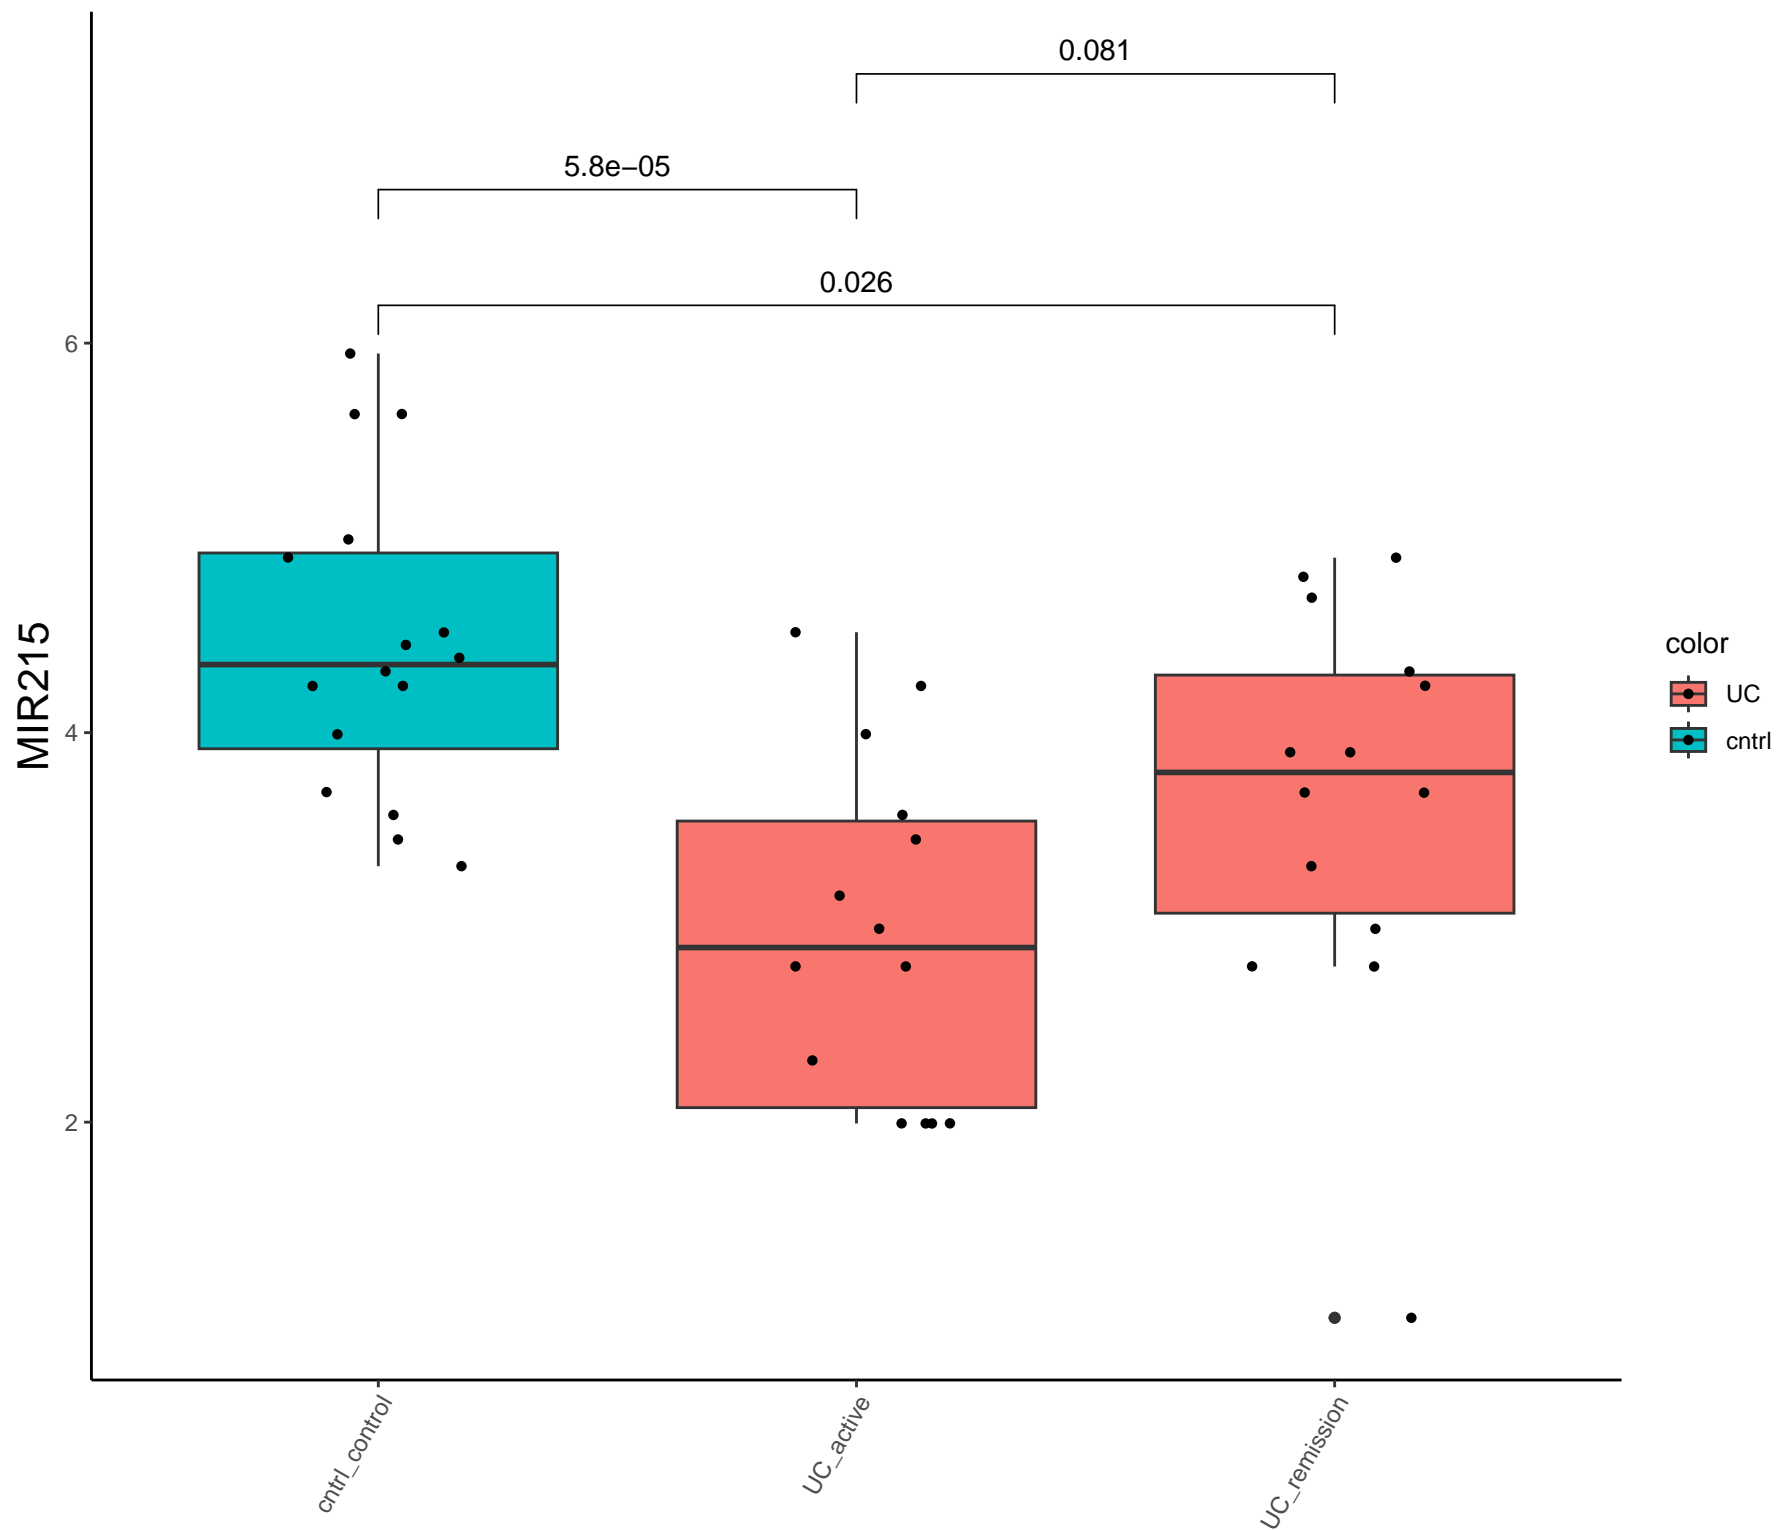

GSE59071

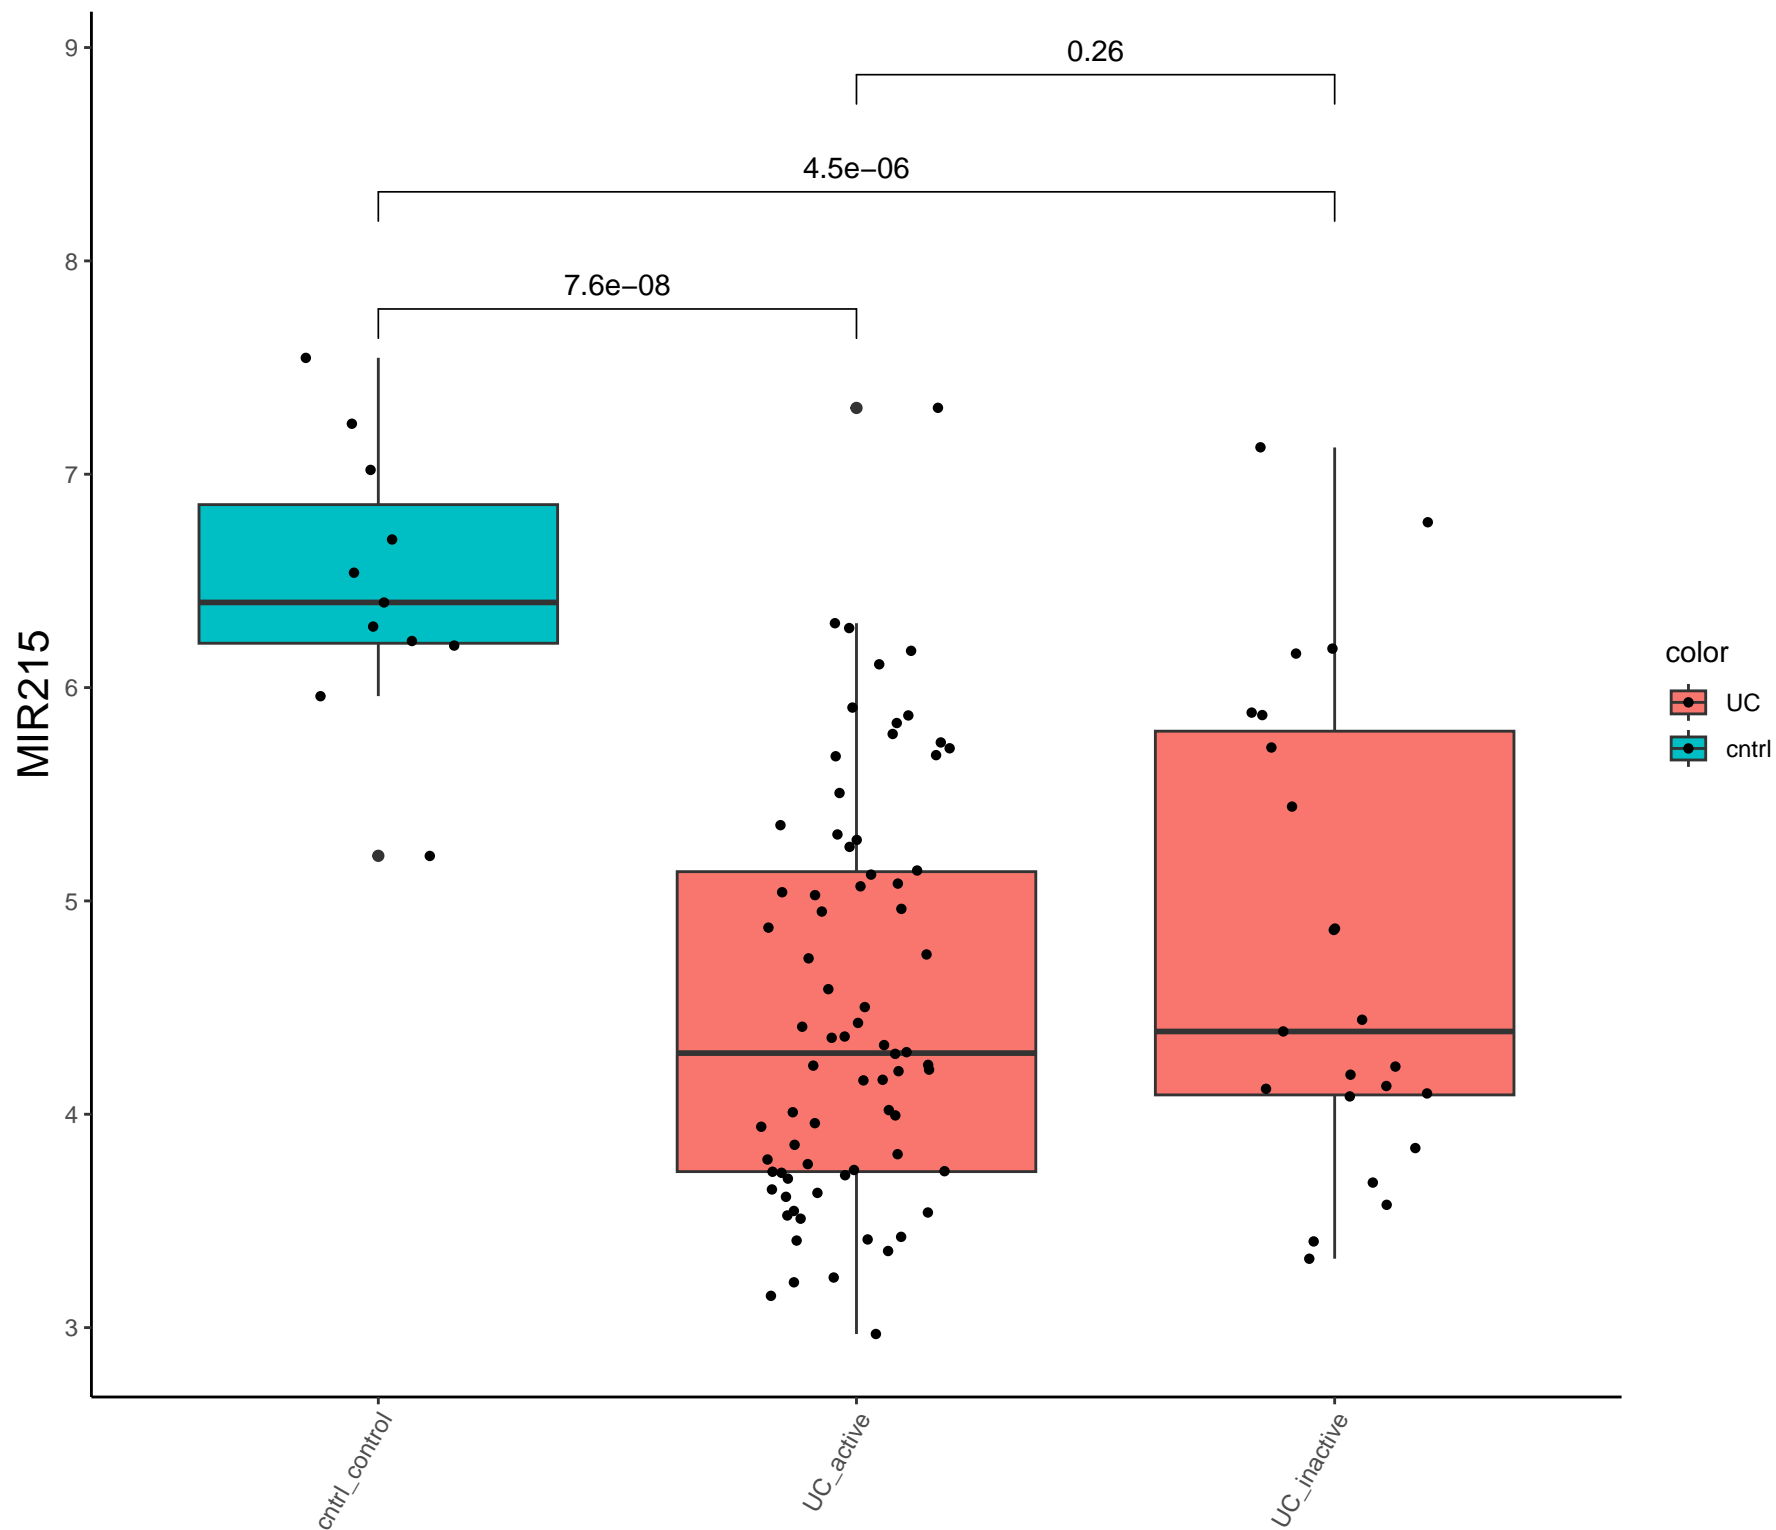

GSE128682

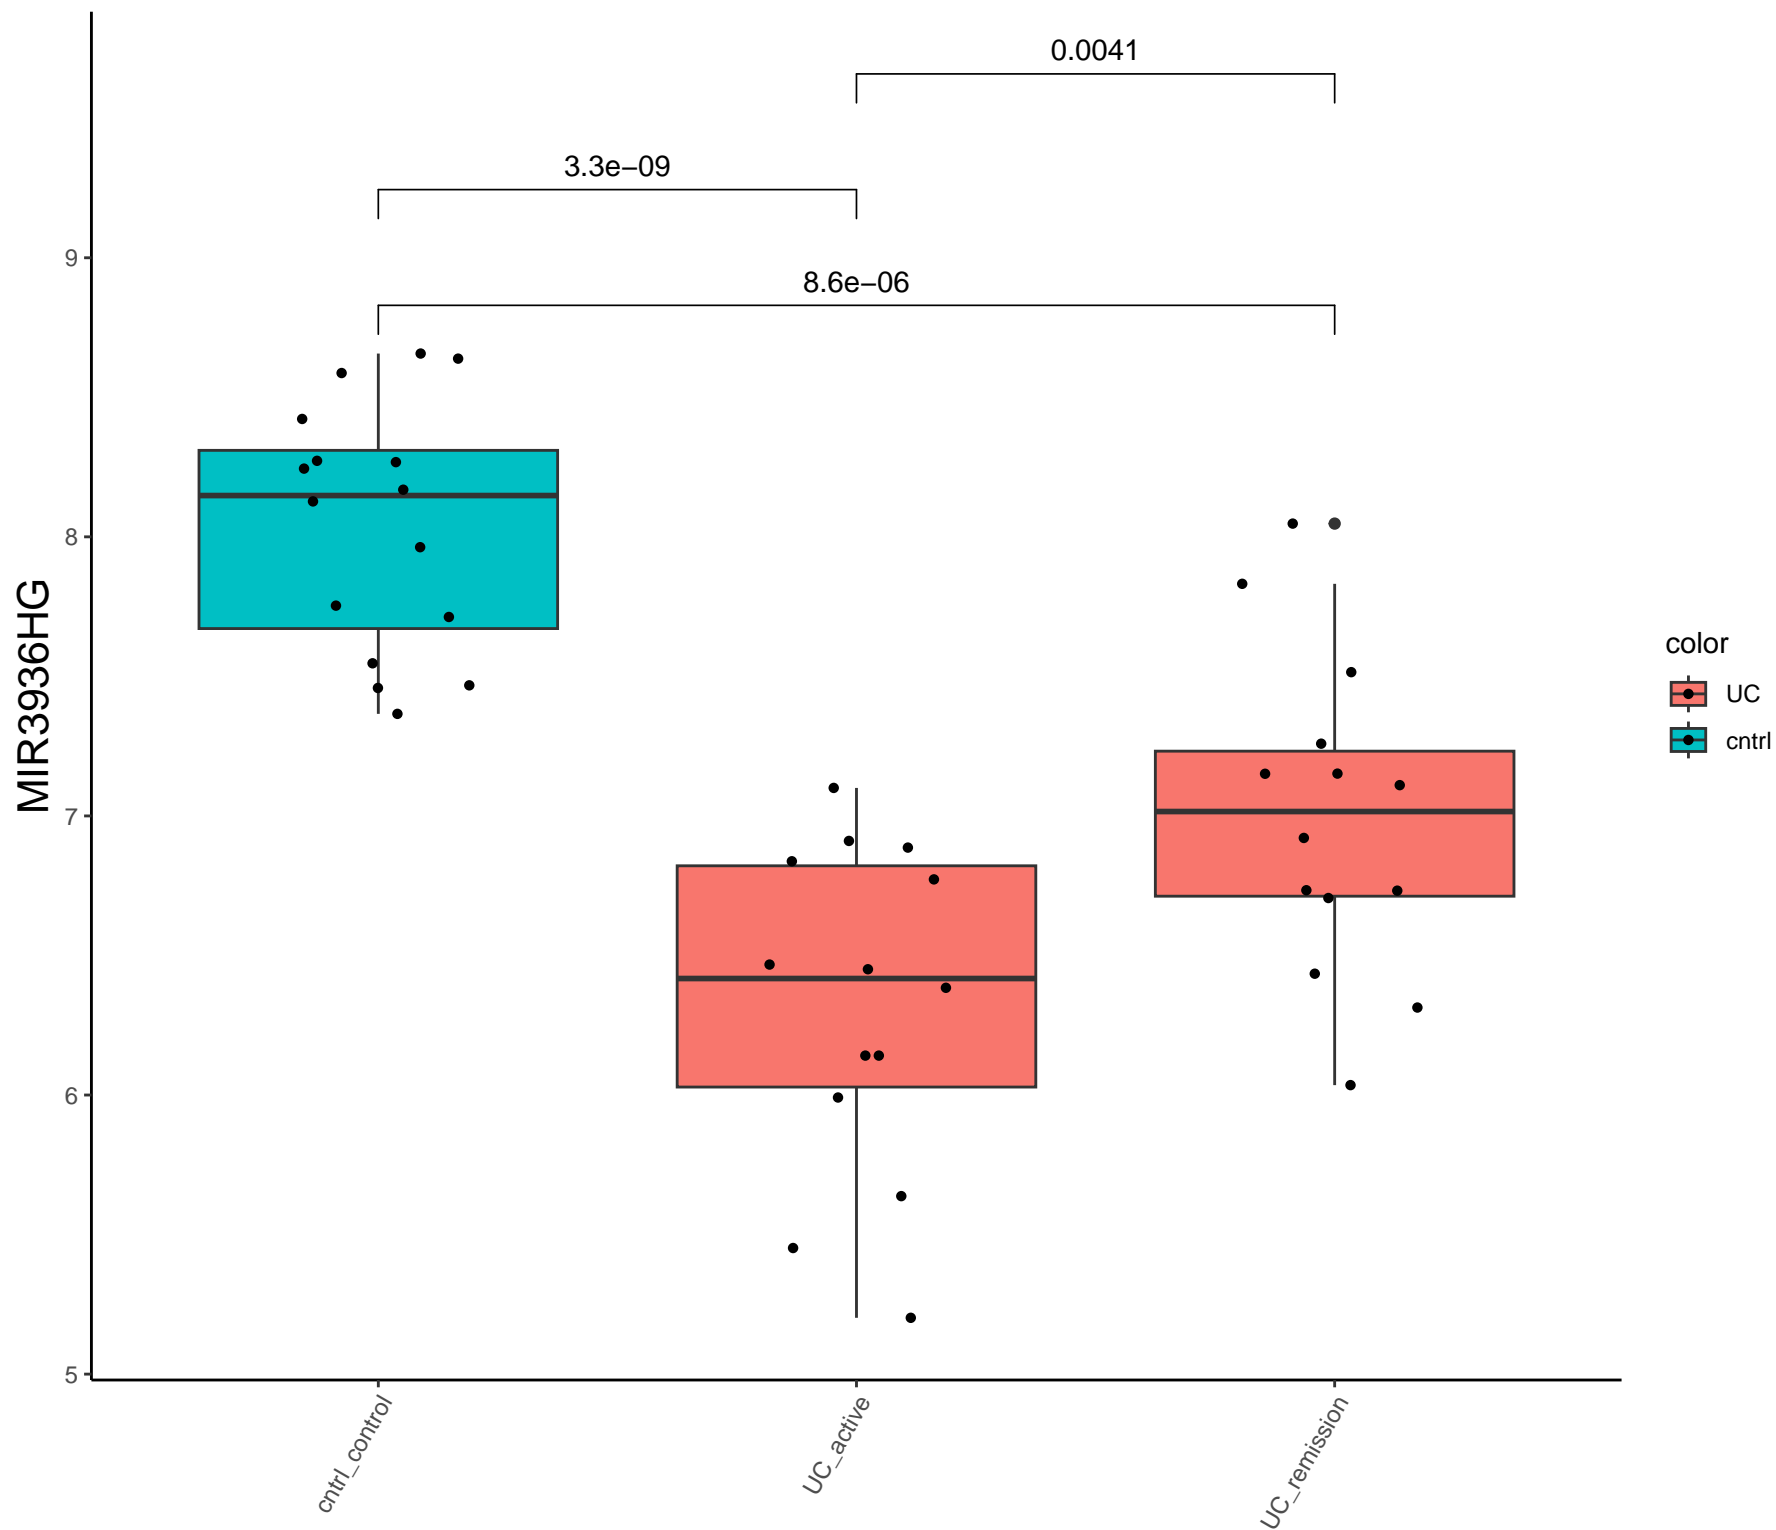

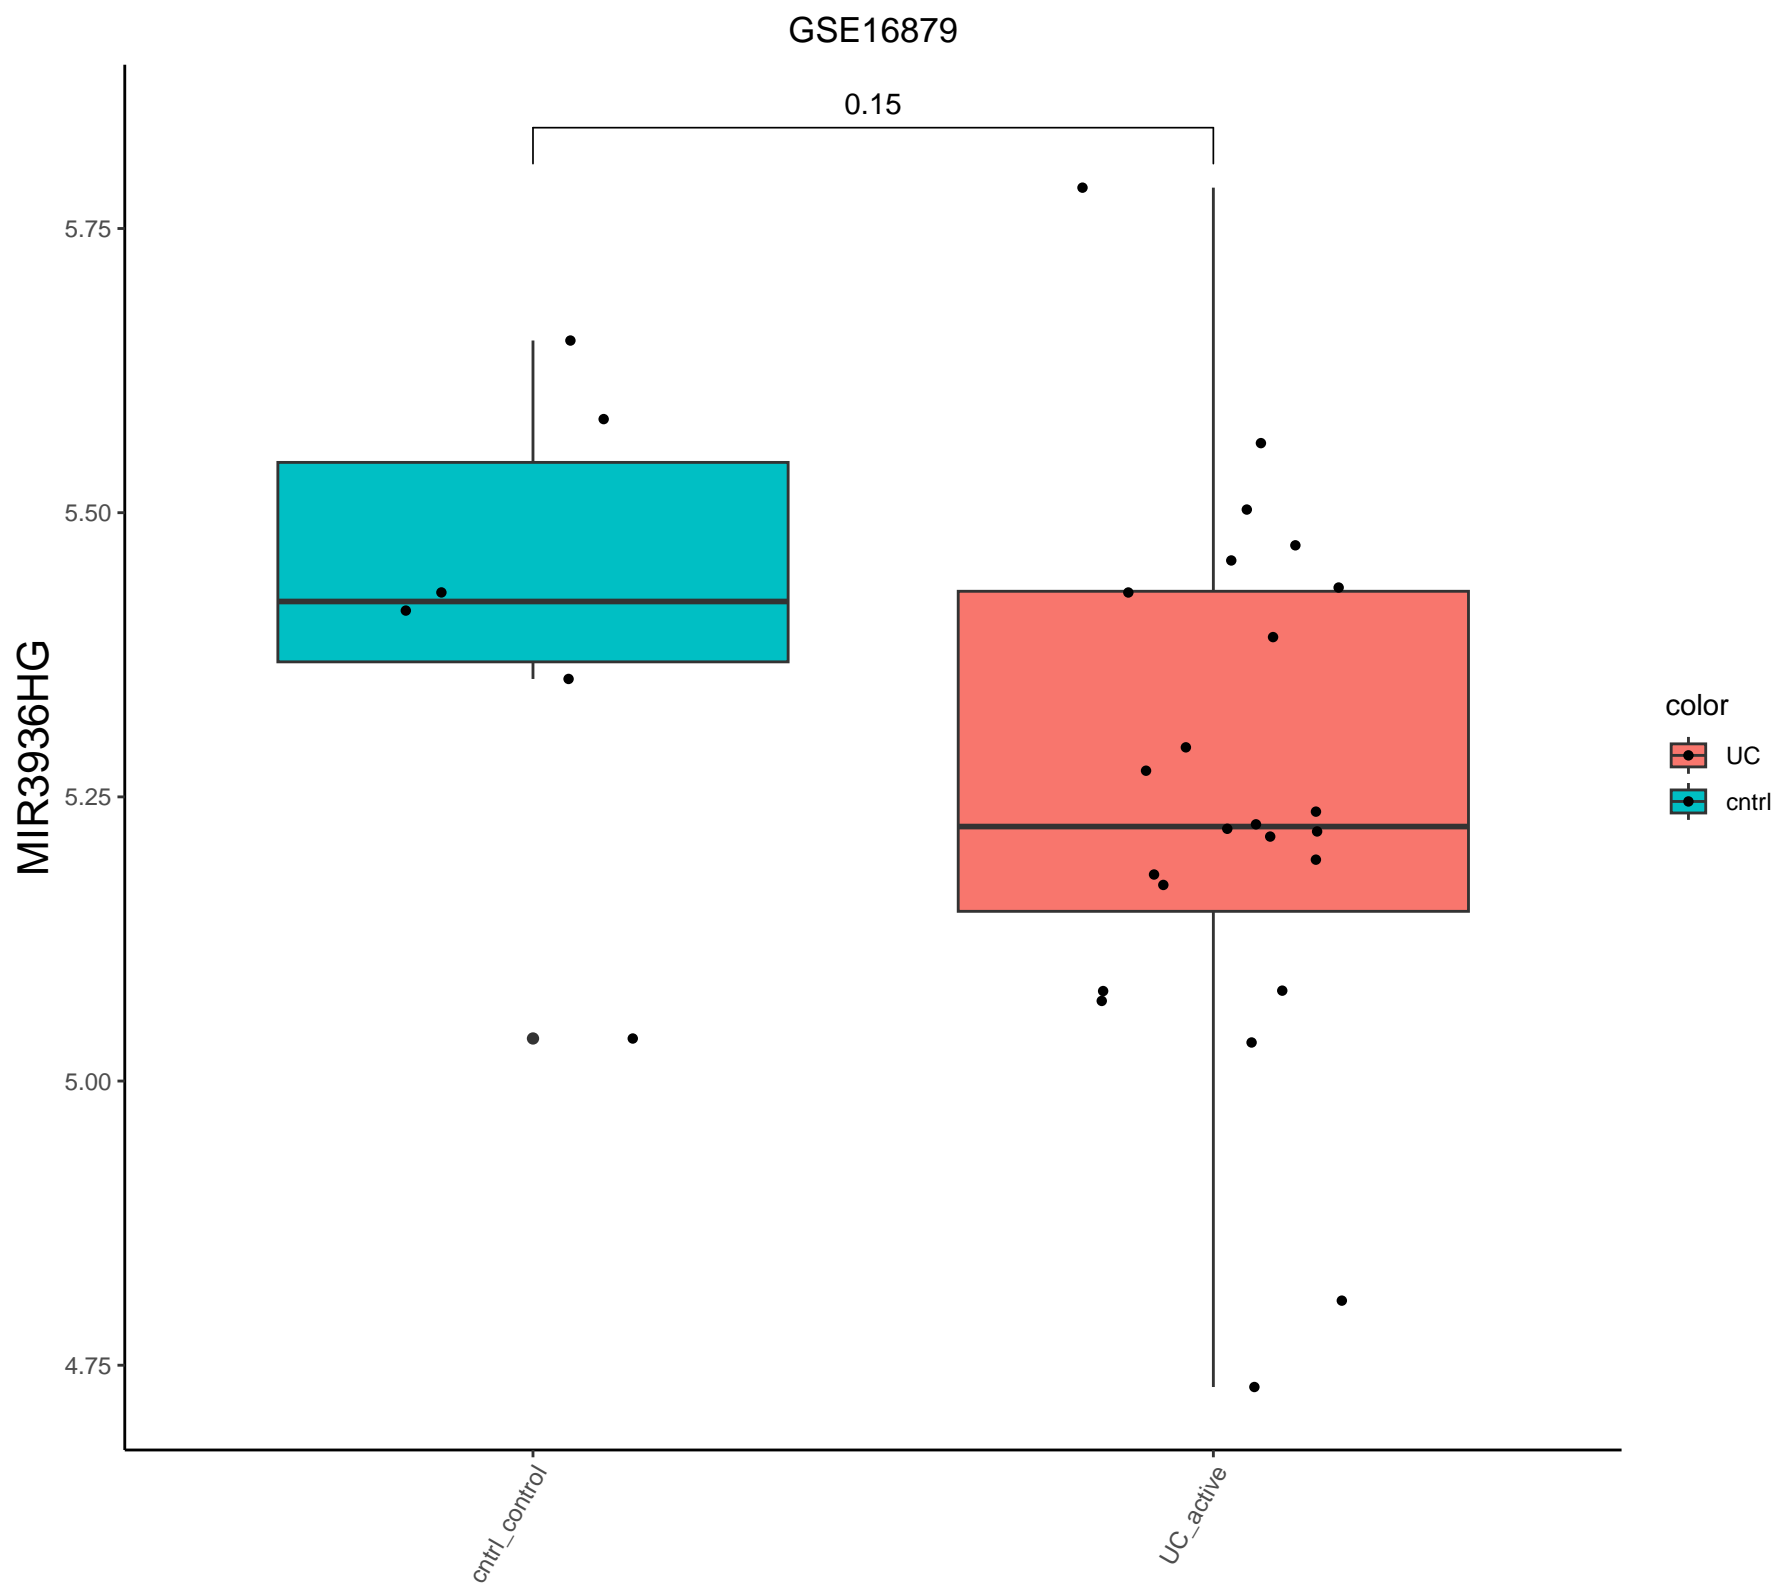



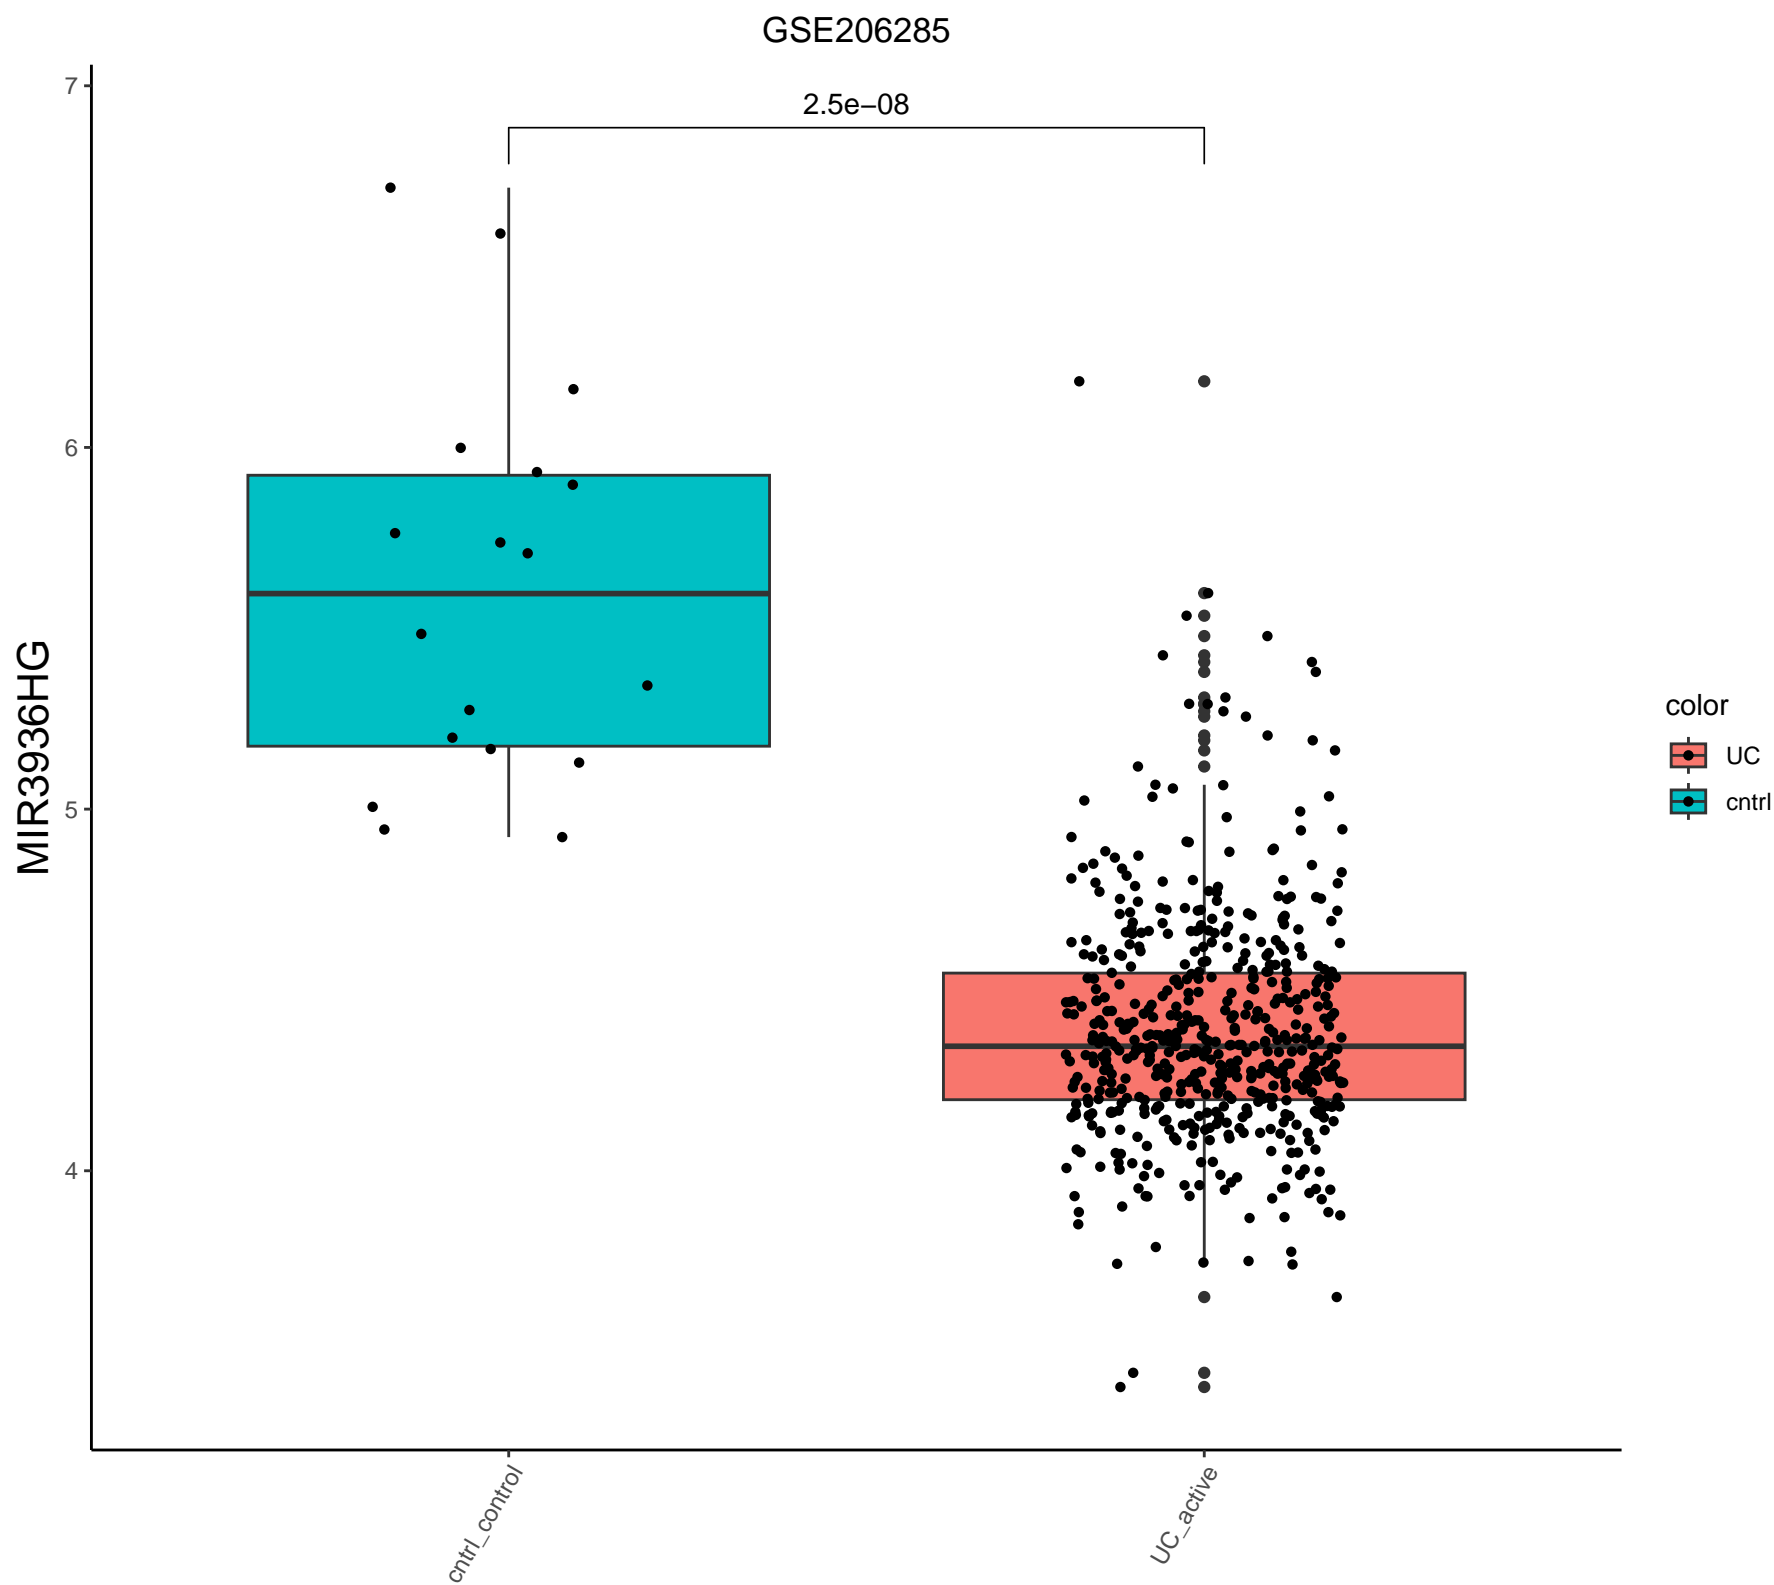

GSE47908

MIR3936HG

0.0023

color

UC  
cntrl

cntrl\_control

UC\_active

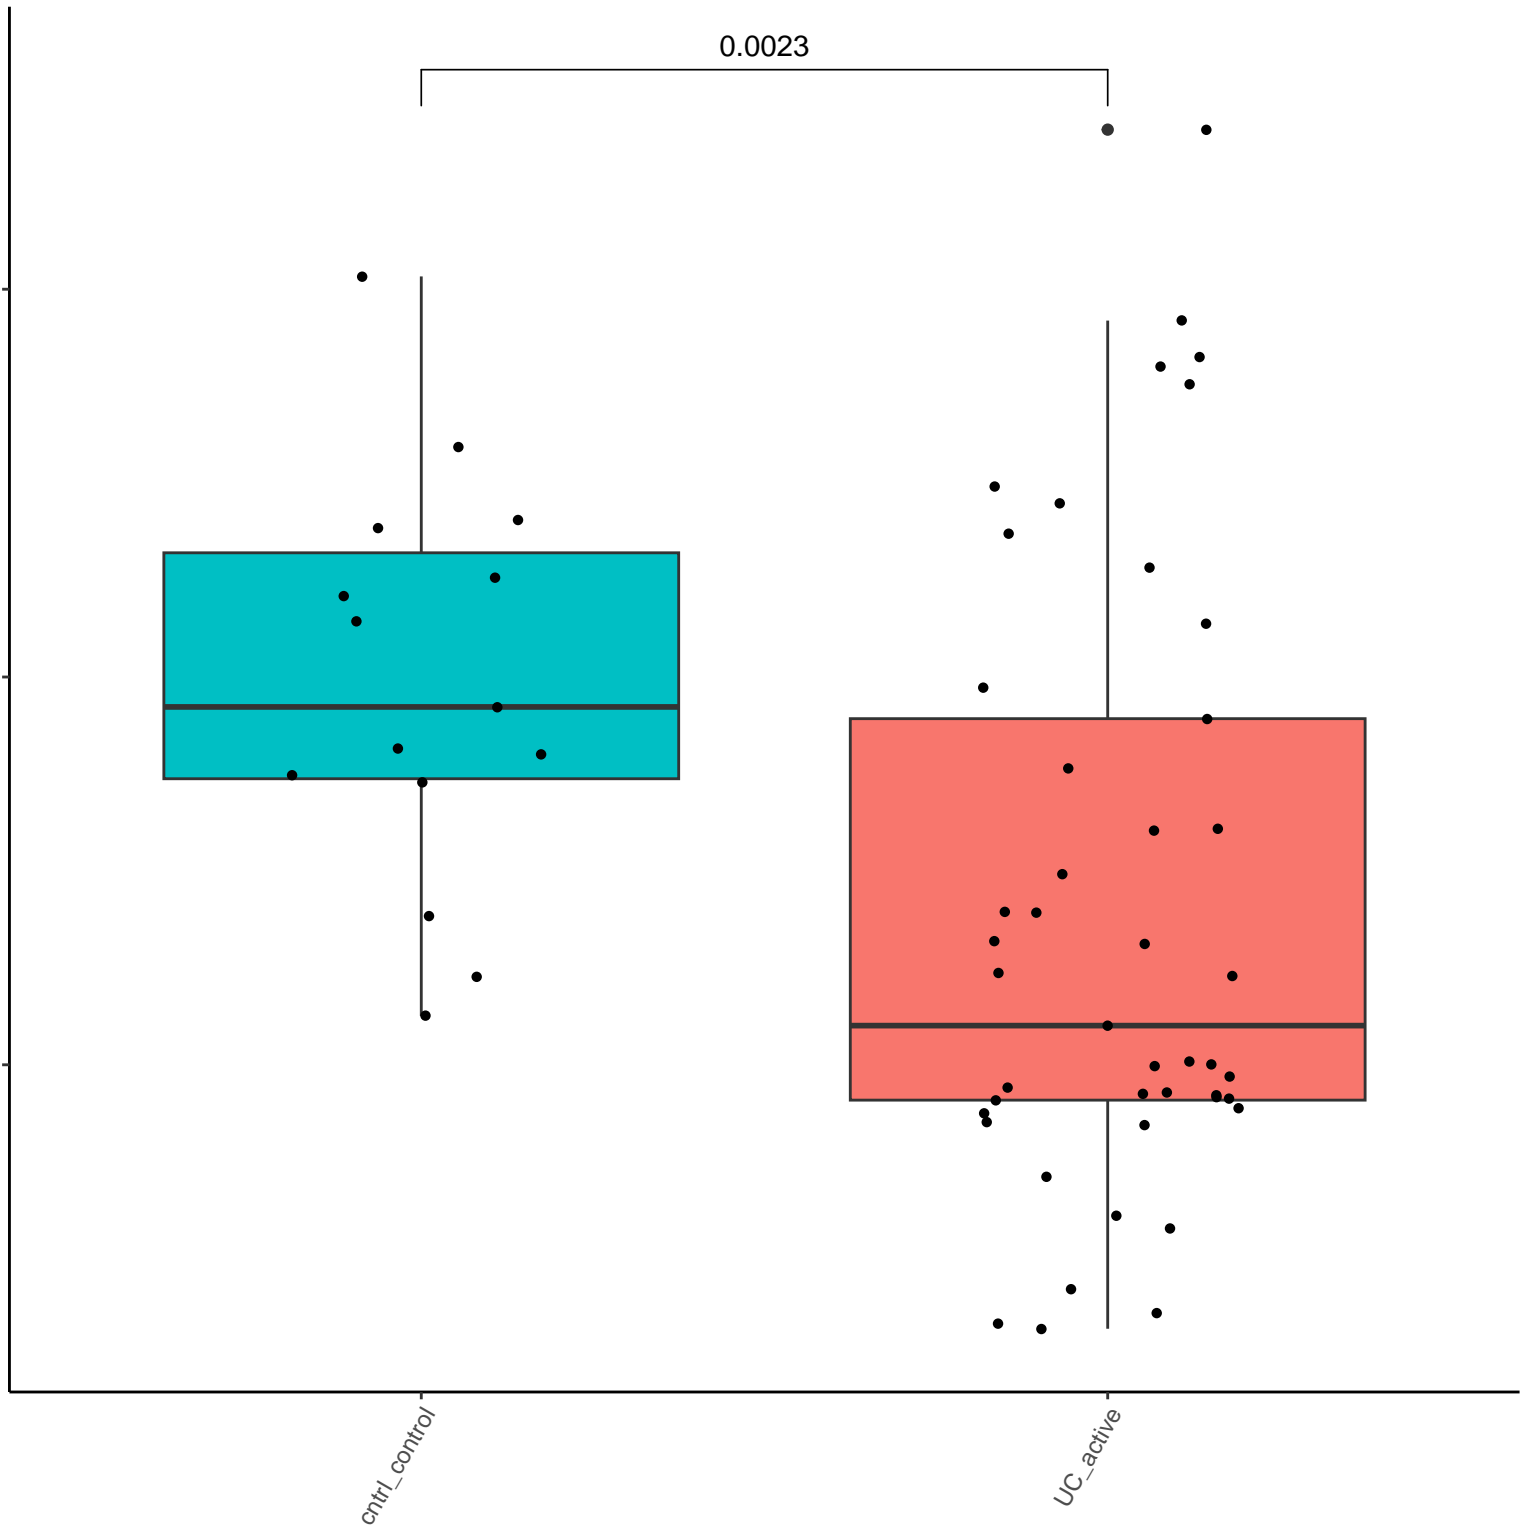

GSE87466

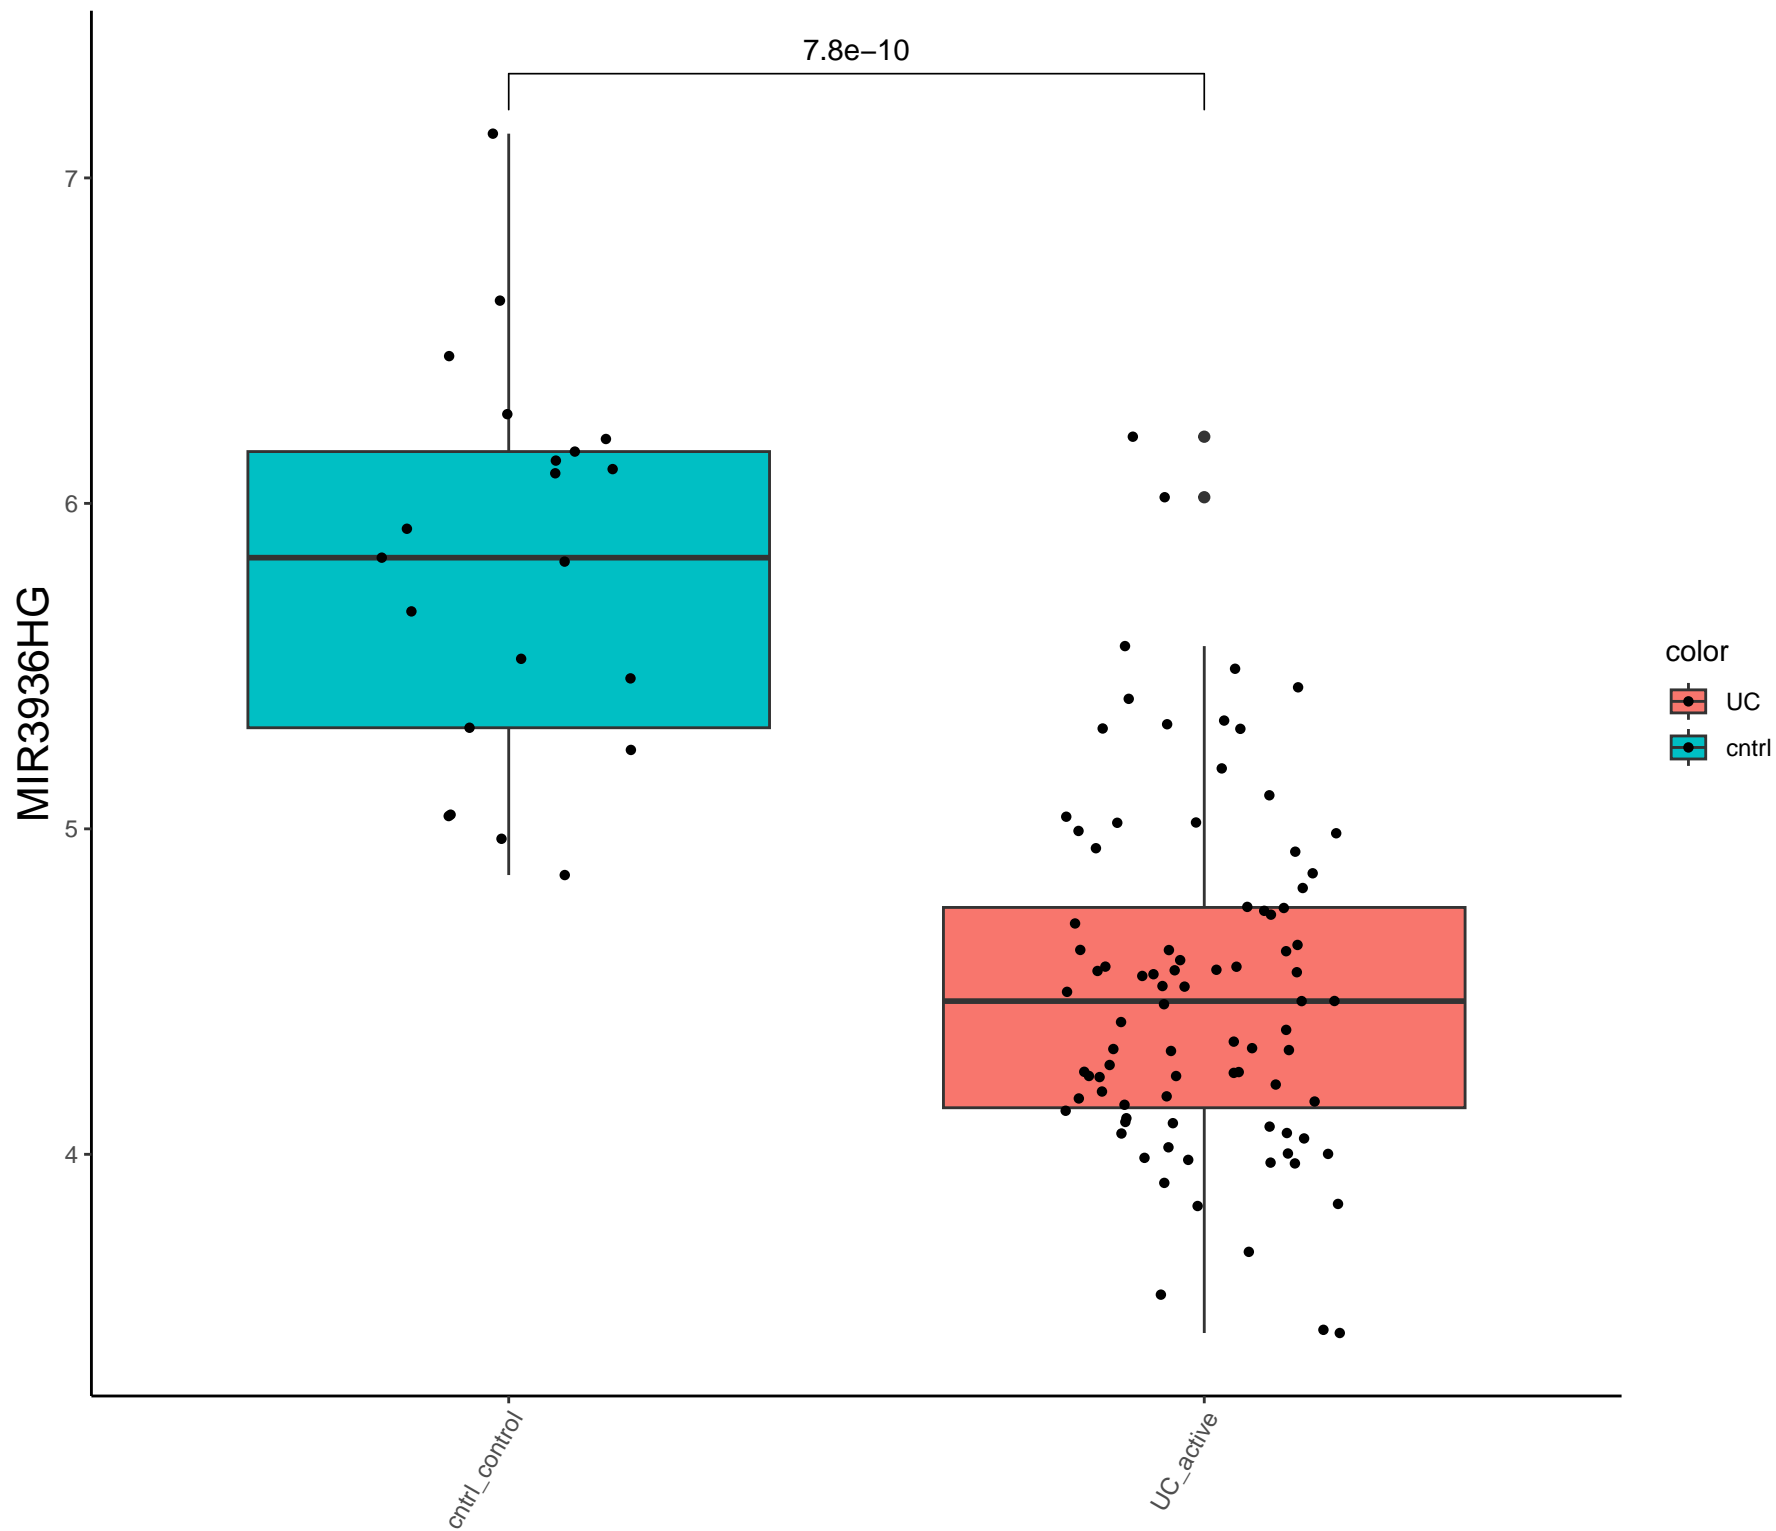

GSE92415

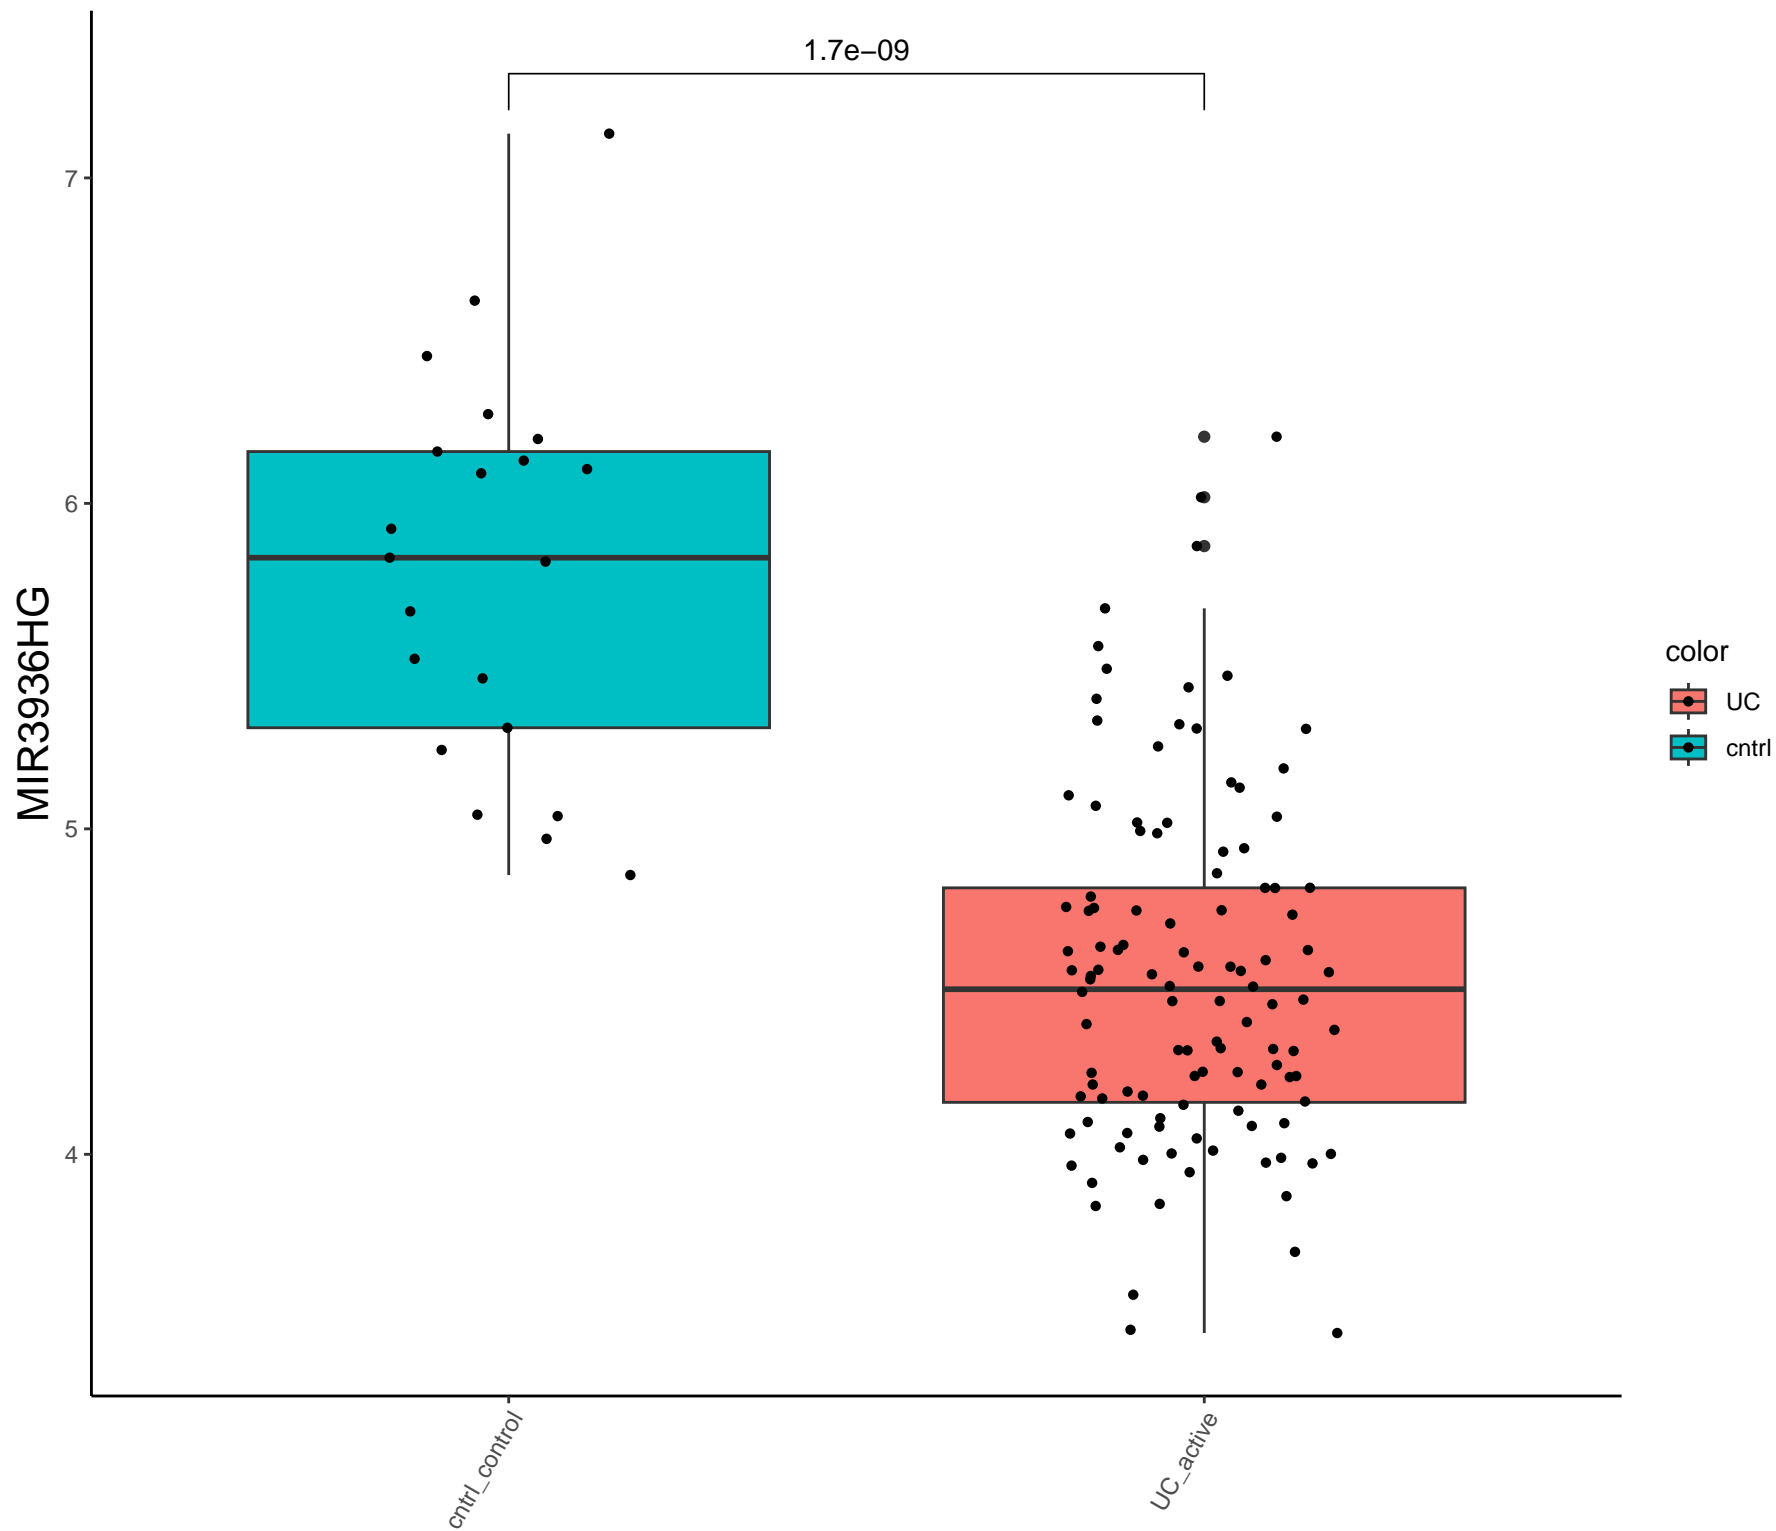

GSE107499

SATB2-AS1

$p < 2.22e-16$

color

Lesional  
Non-lesional

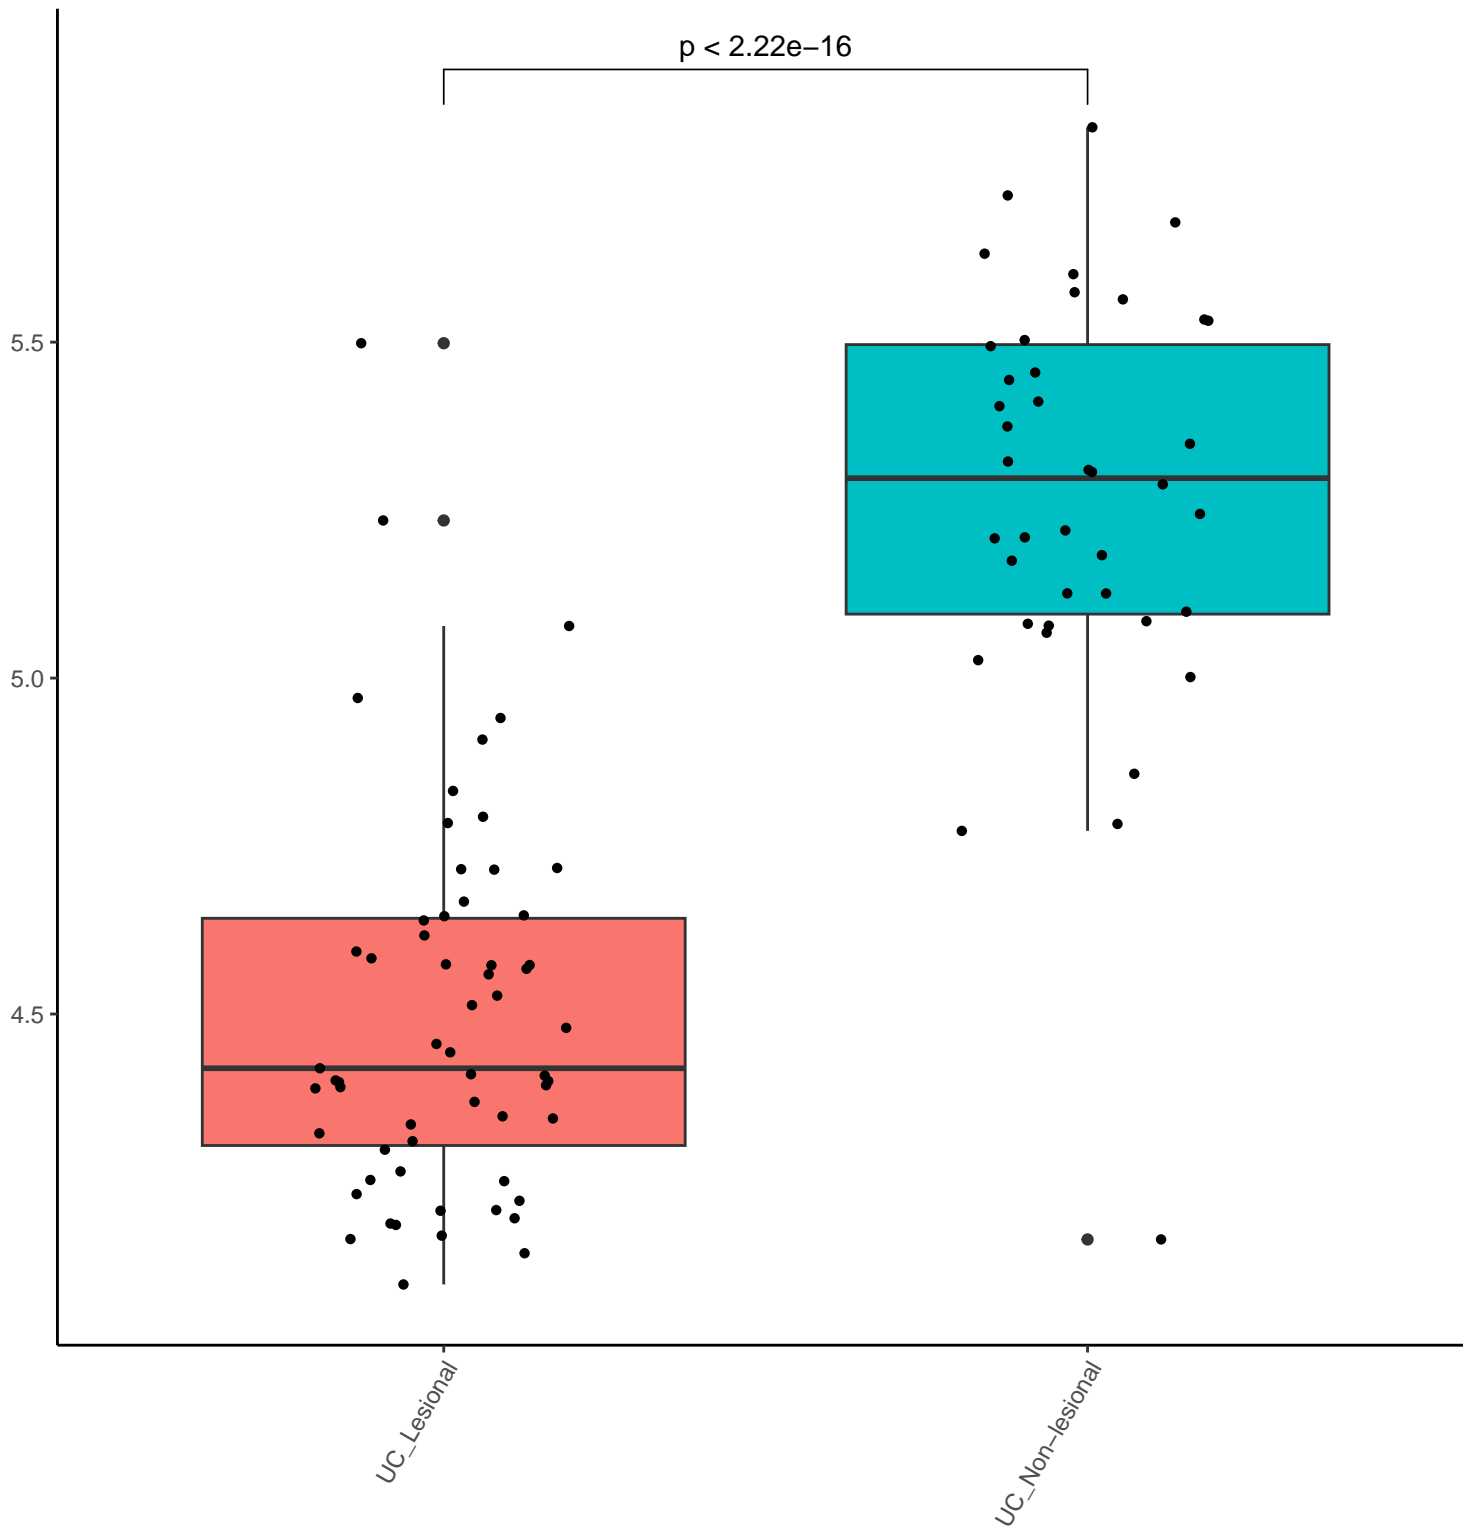

GSE109142

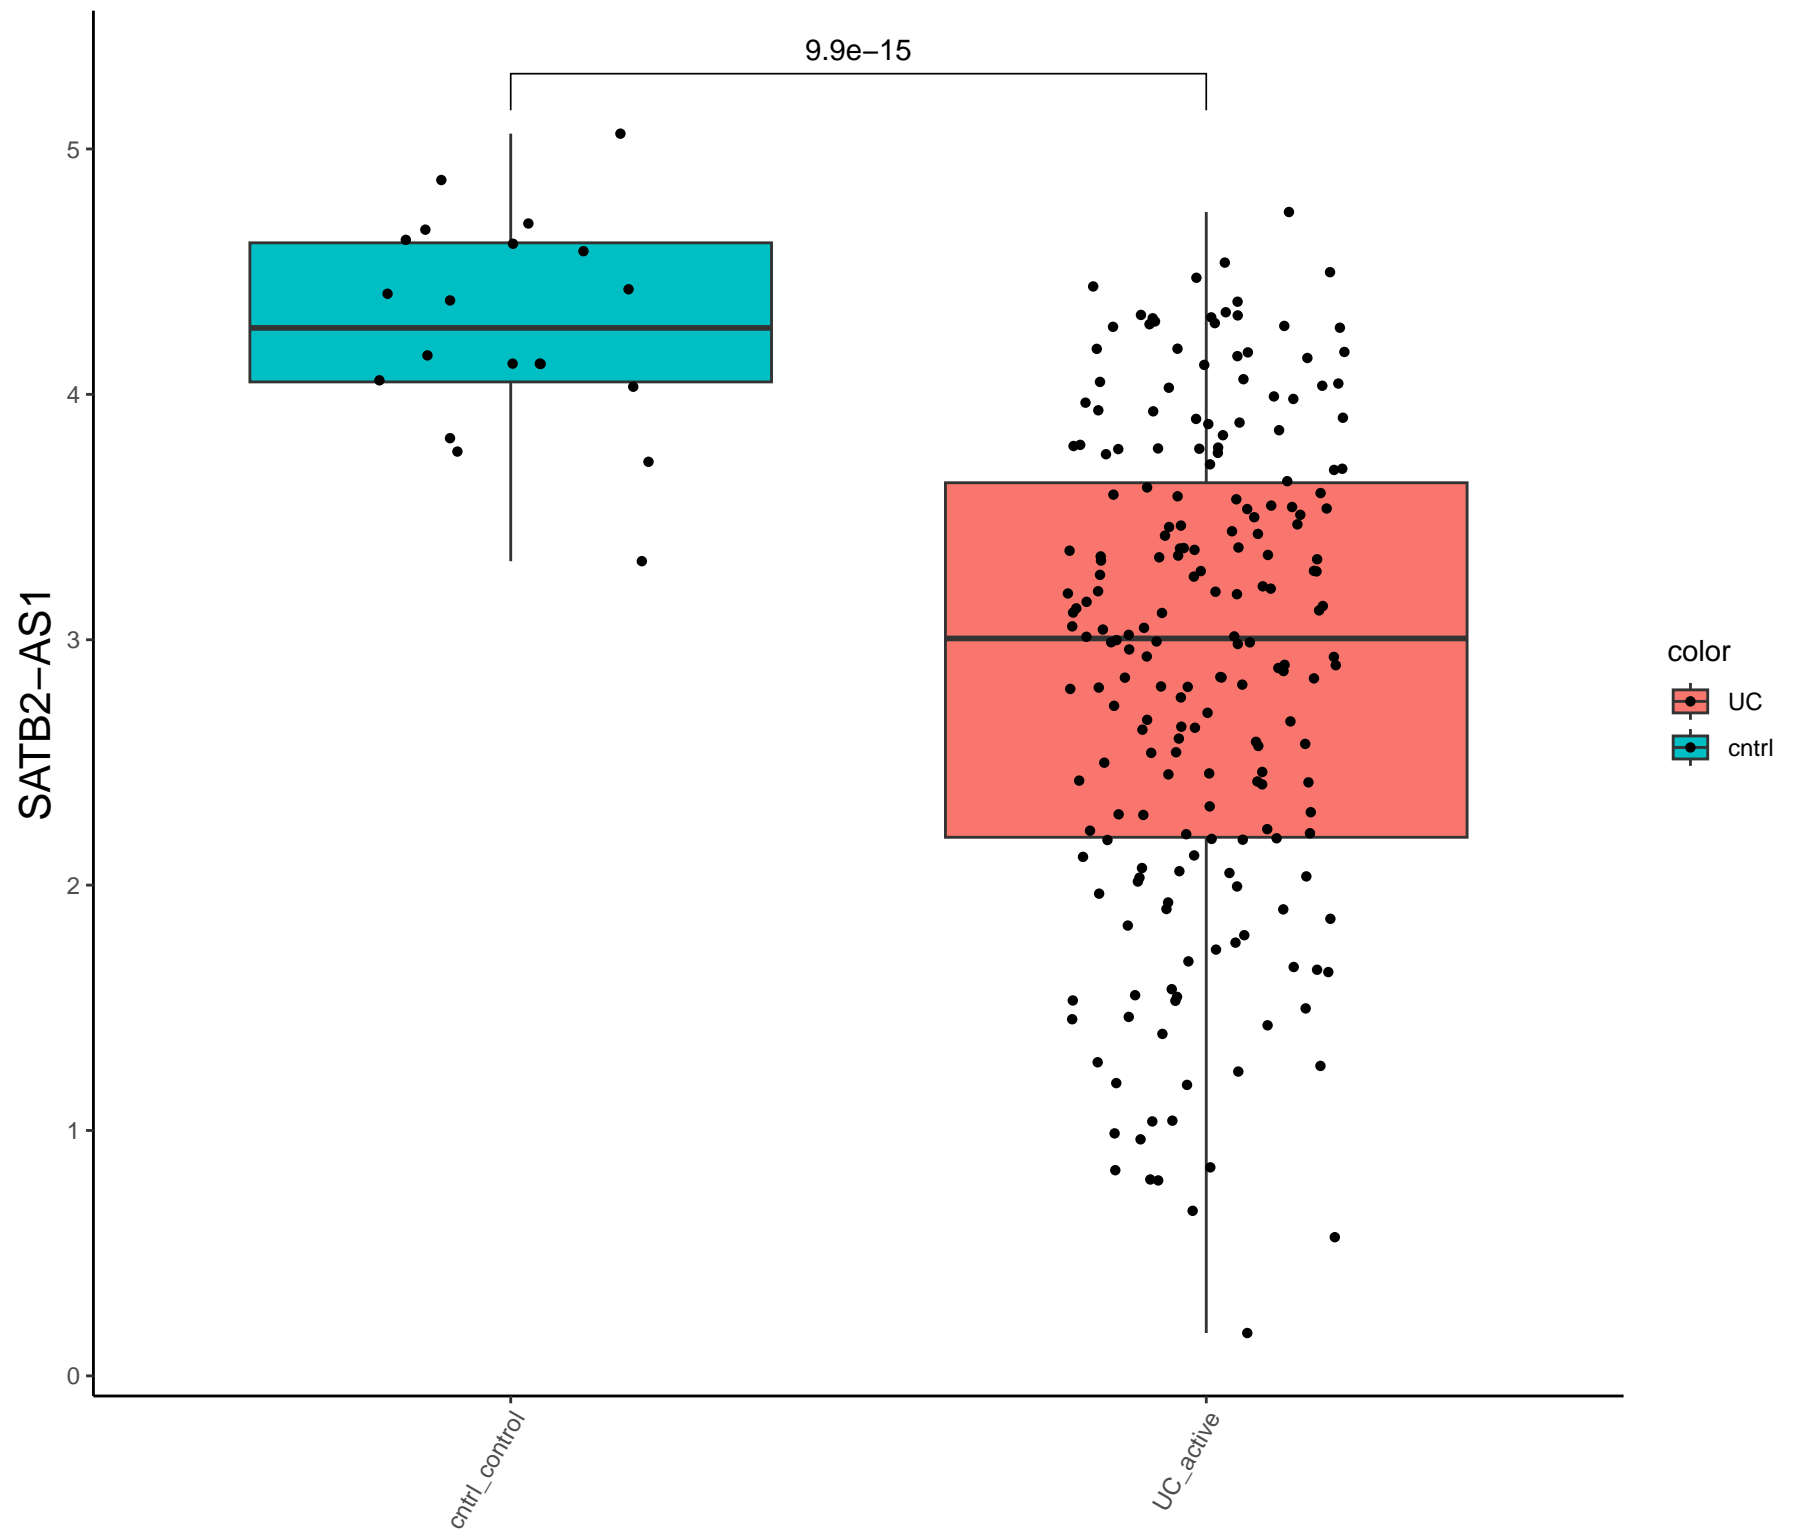

GSE128682

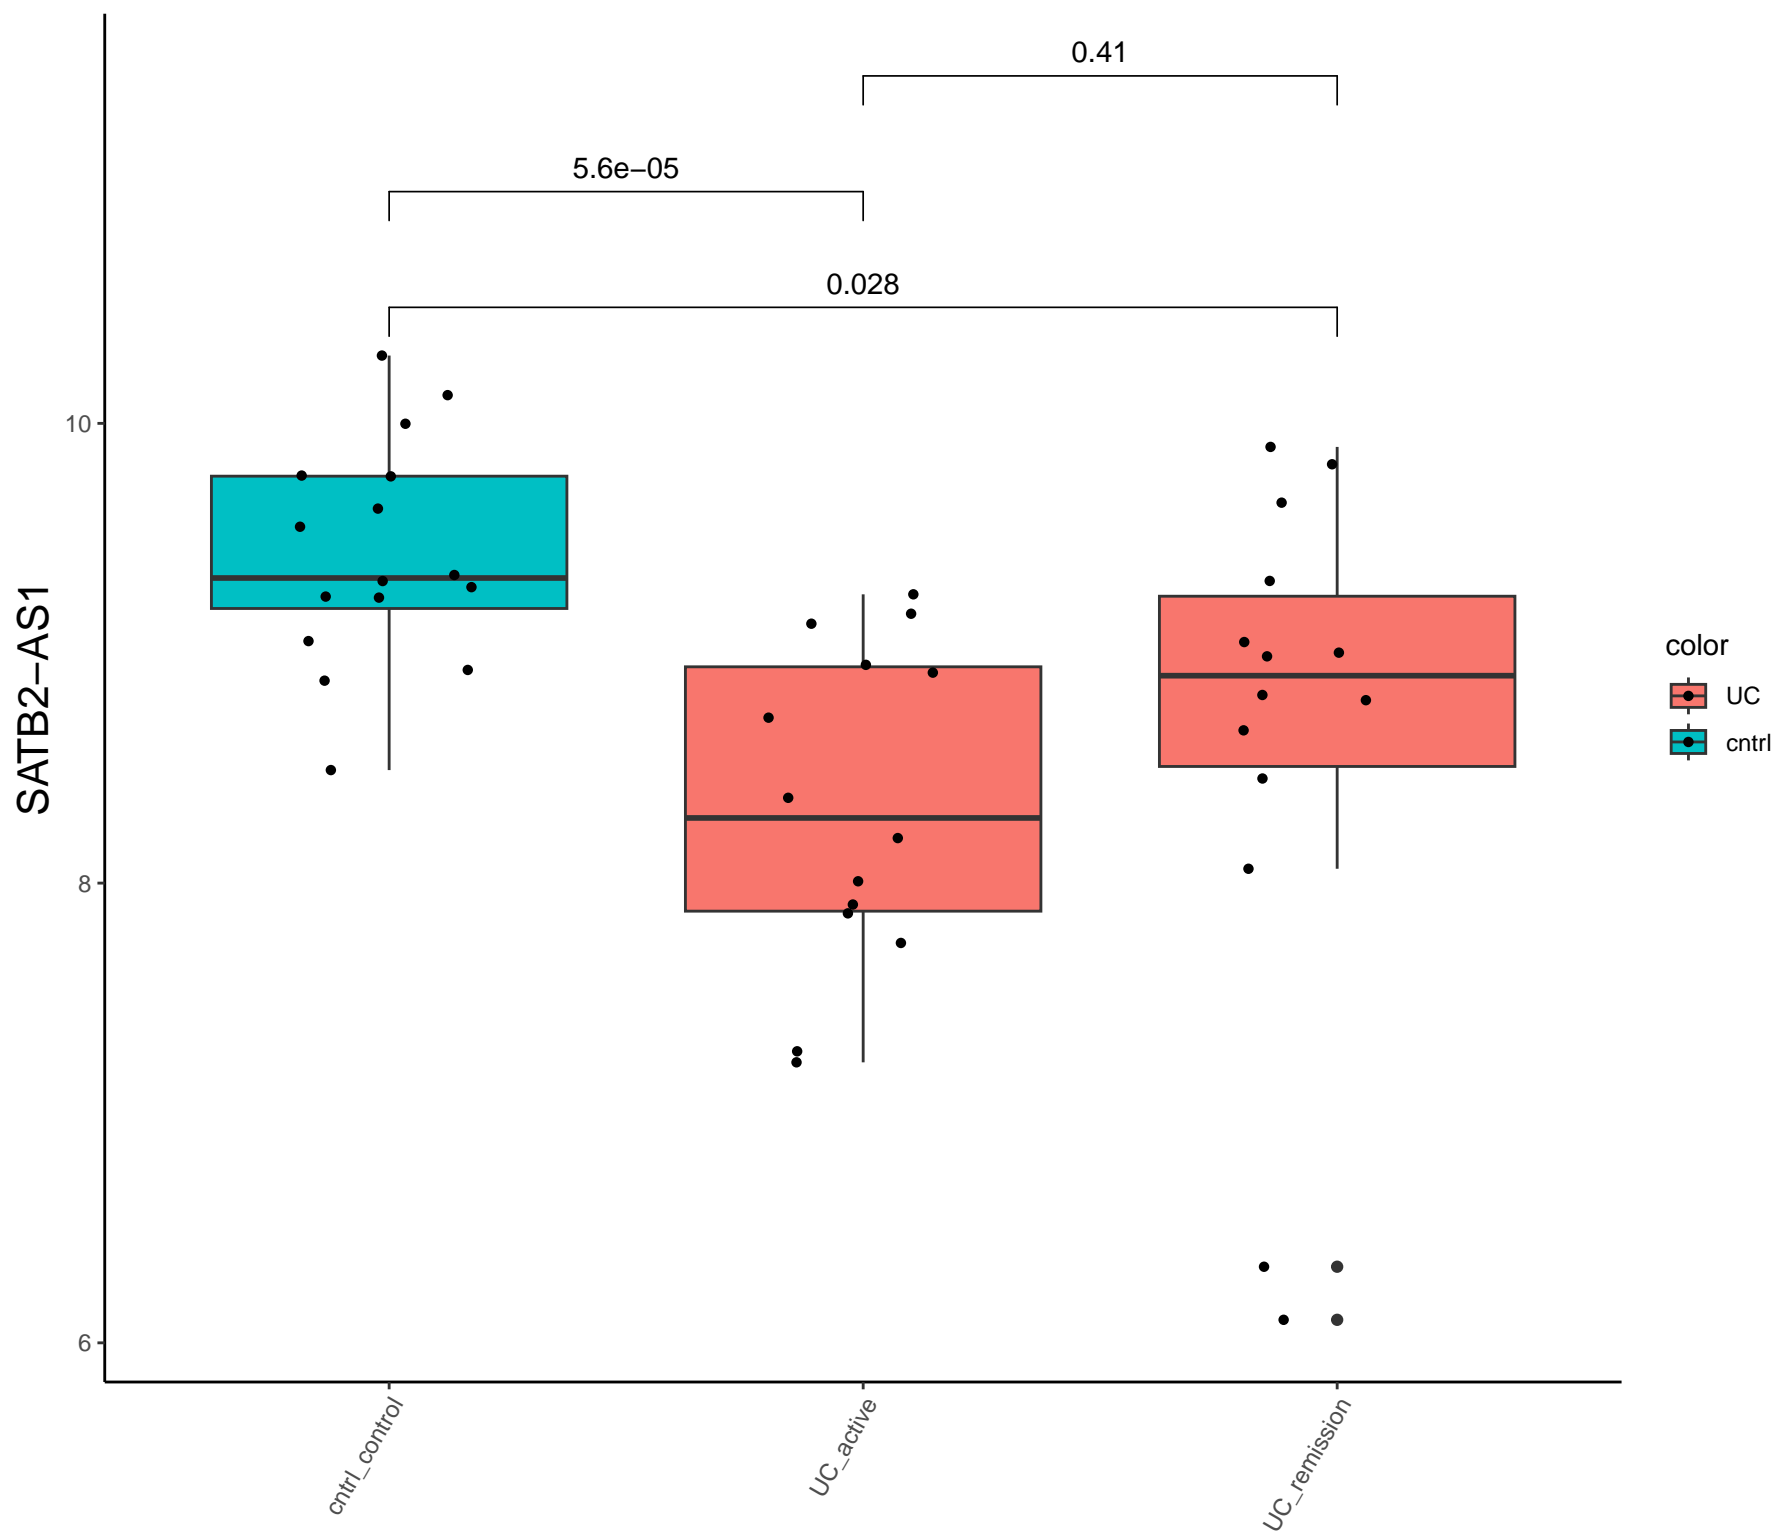

GSE16879

SATB2-AS1

4.1e-07

color

UC  
cntrl

cntrl\_control

UC\_active

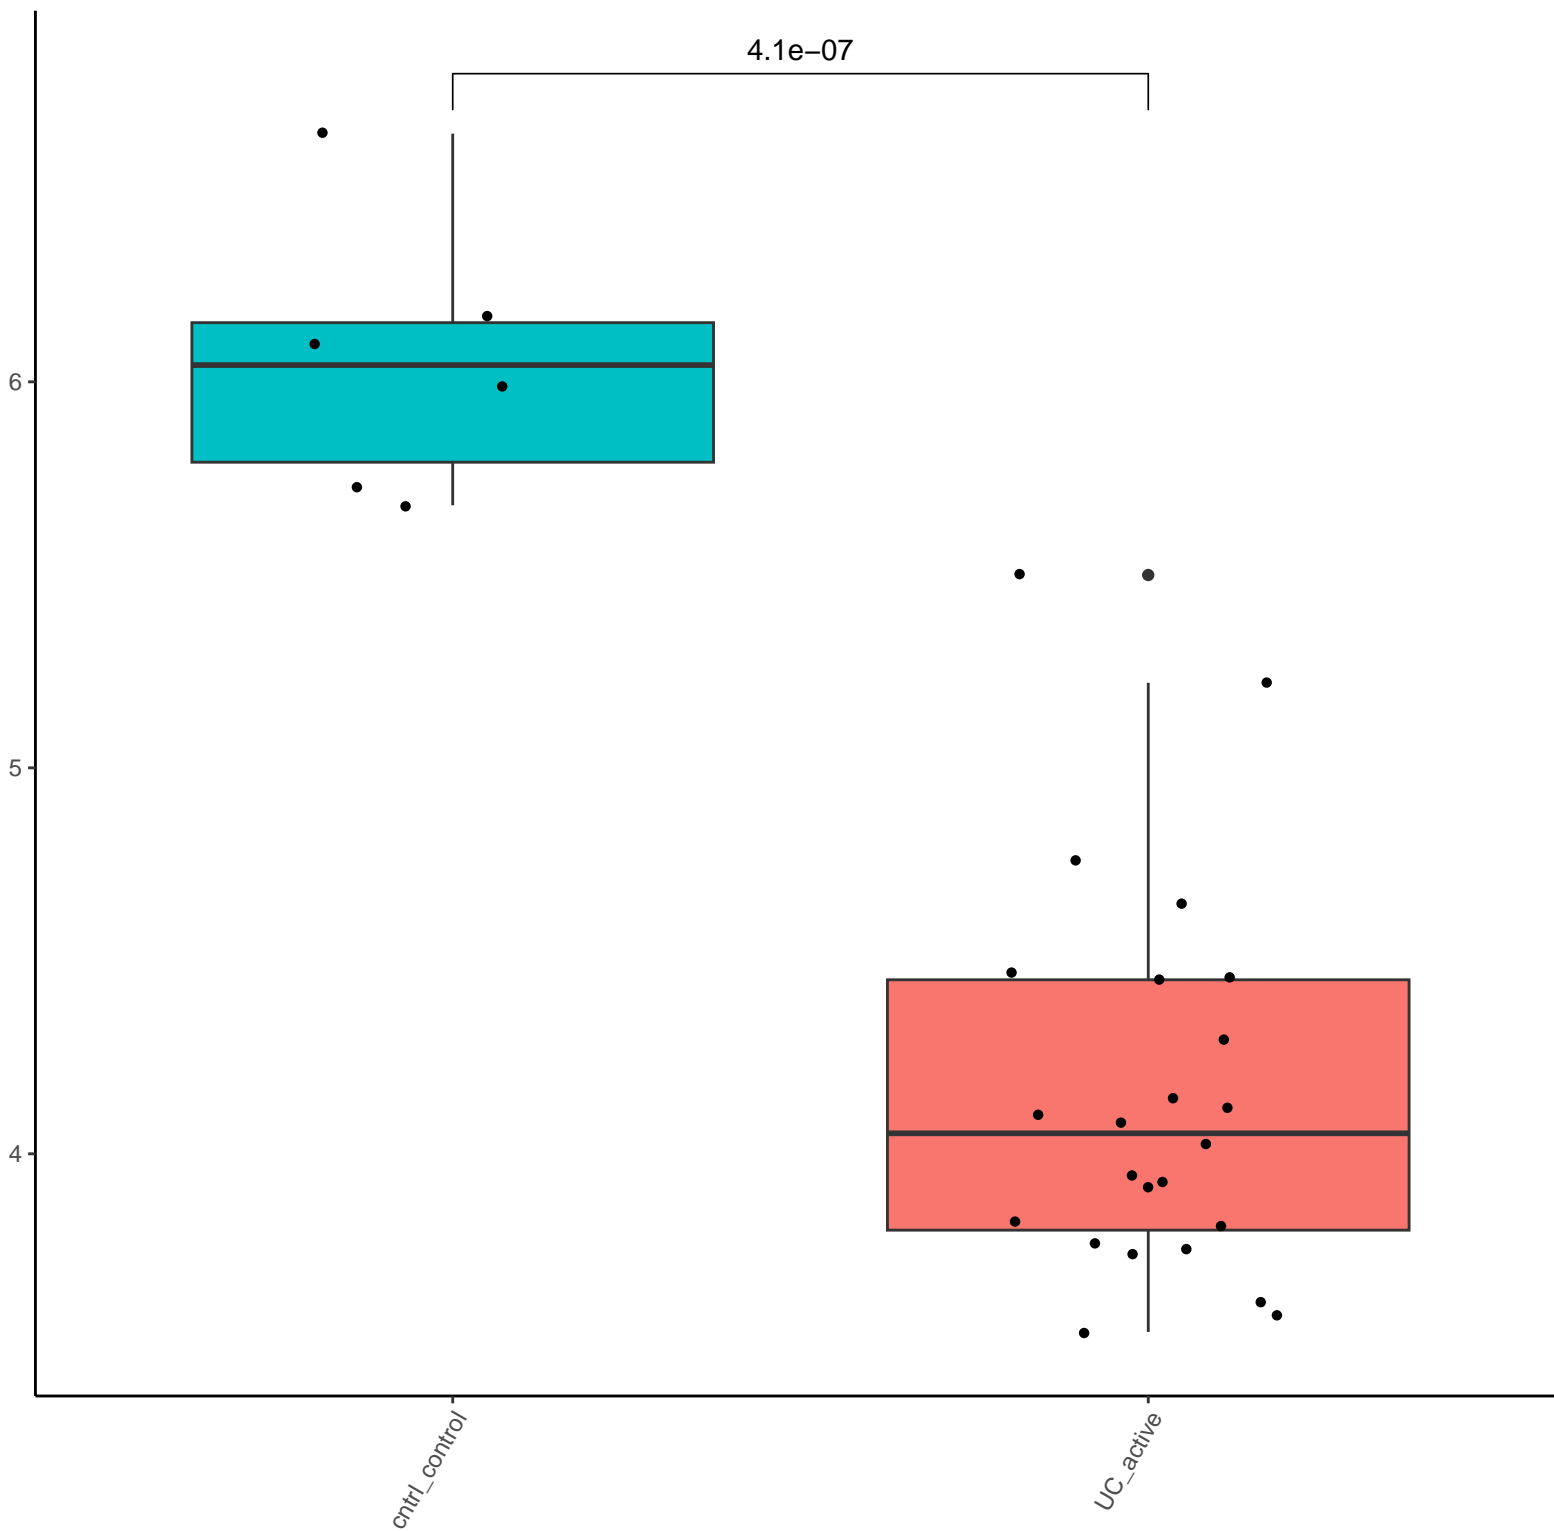



GSE206285

SATB2-AS1

5.3e-10

cntrl\_control

UC\_active

color

UC  
cntrl

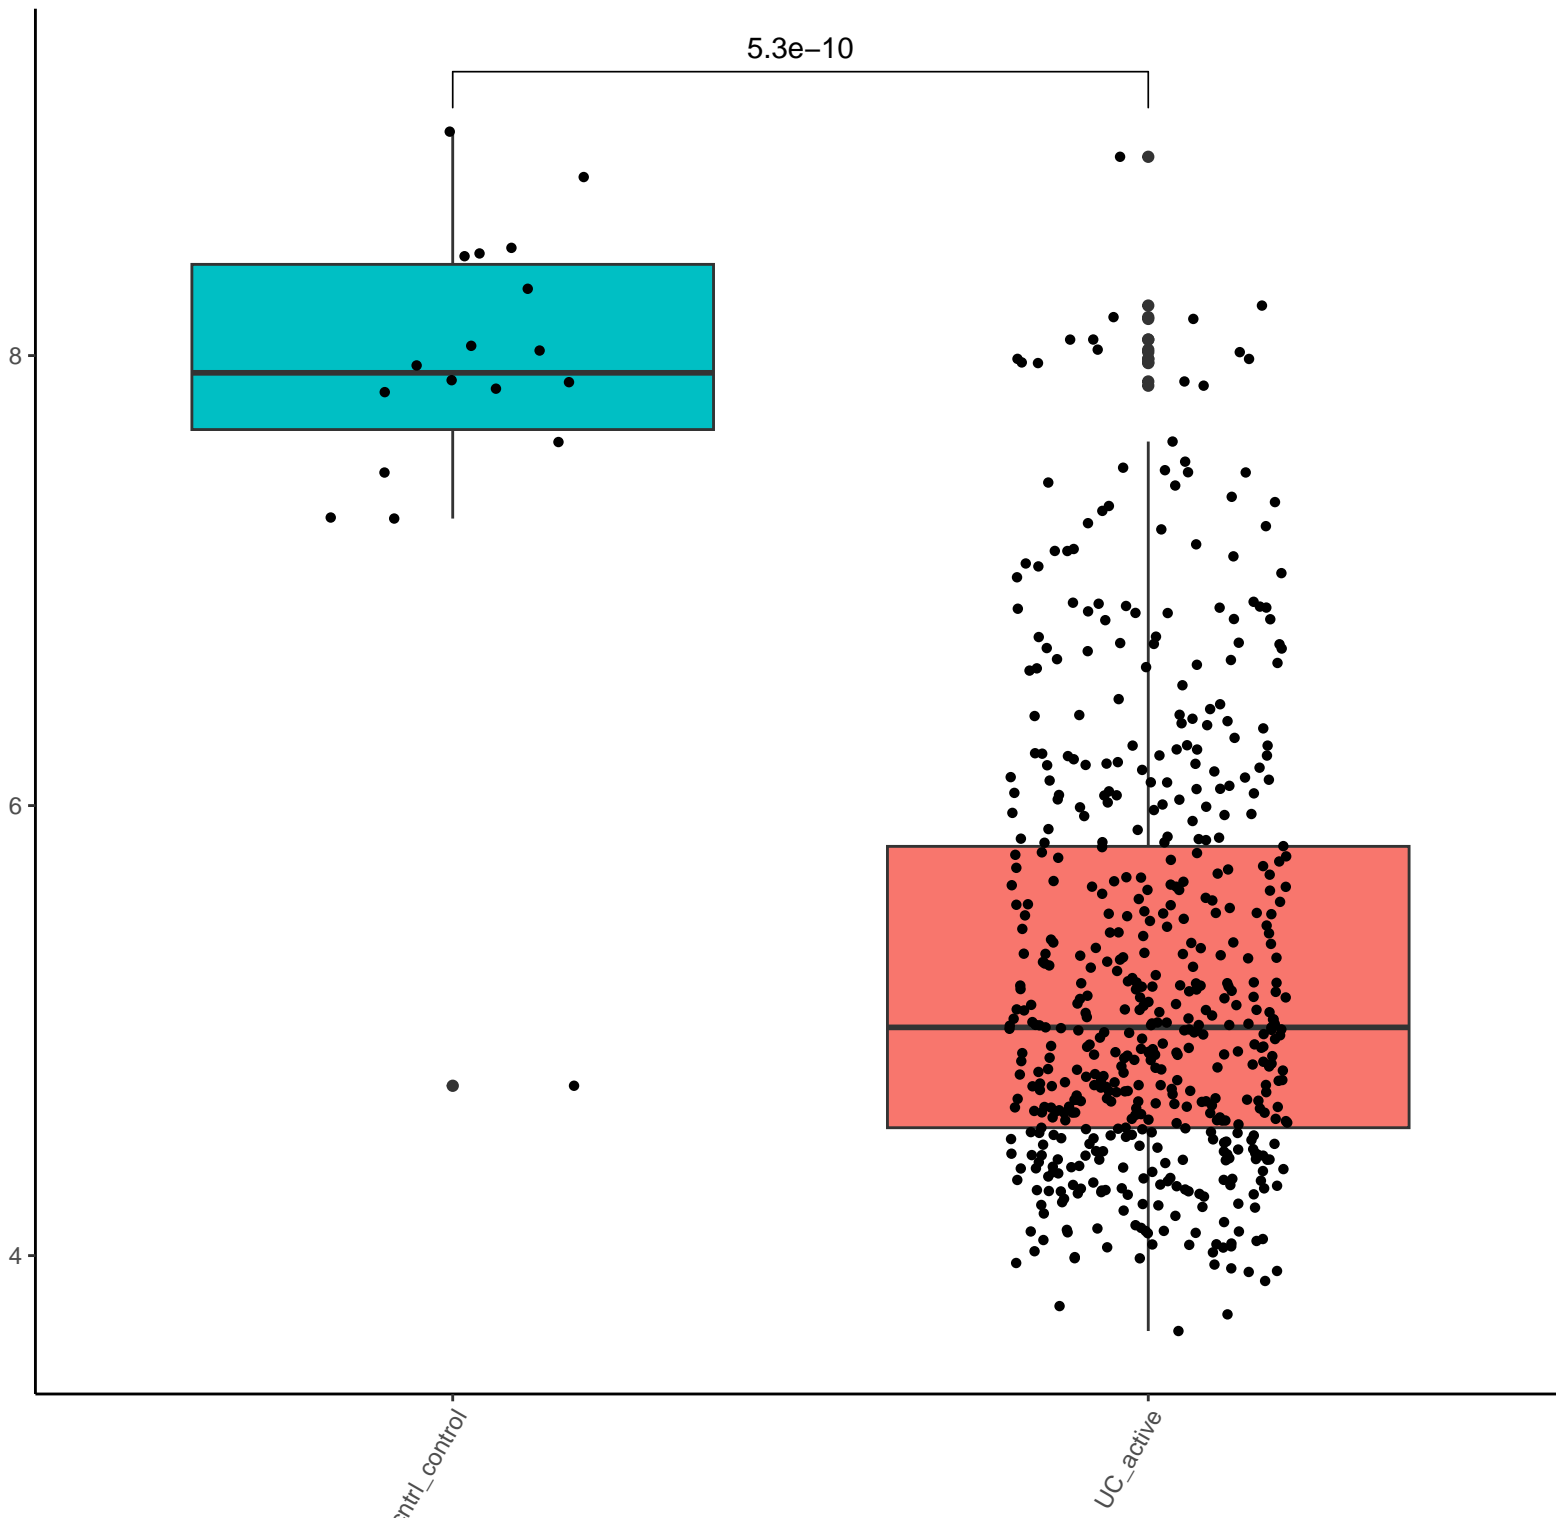

GSE47908

SATB2-AS1

3.9e-08

cntrl\_control

UC\_active

color

UC  
cntrl

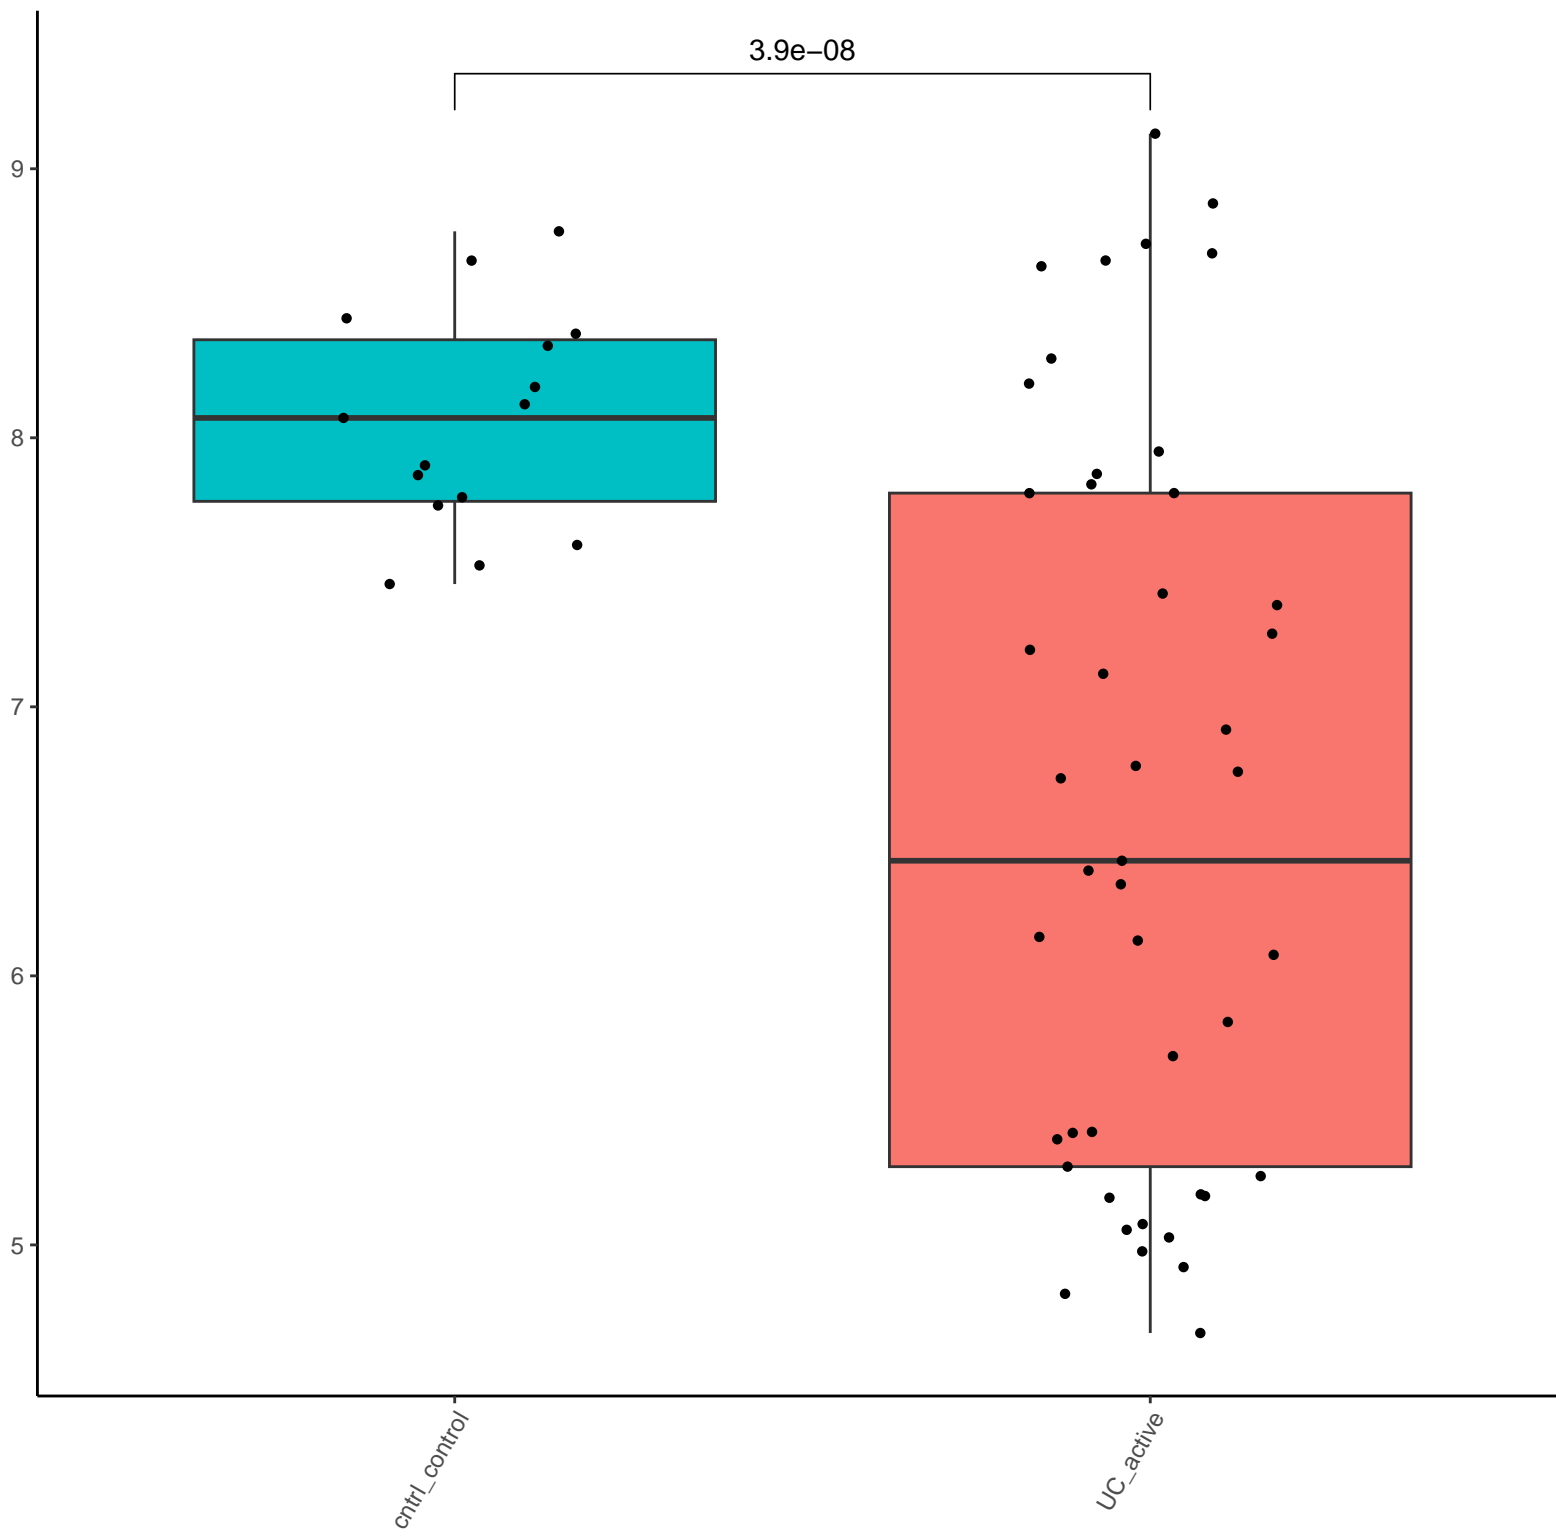

GSE59071

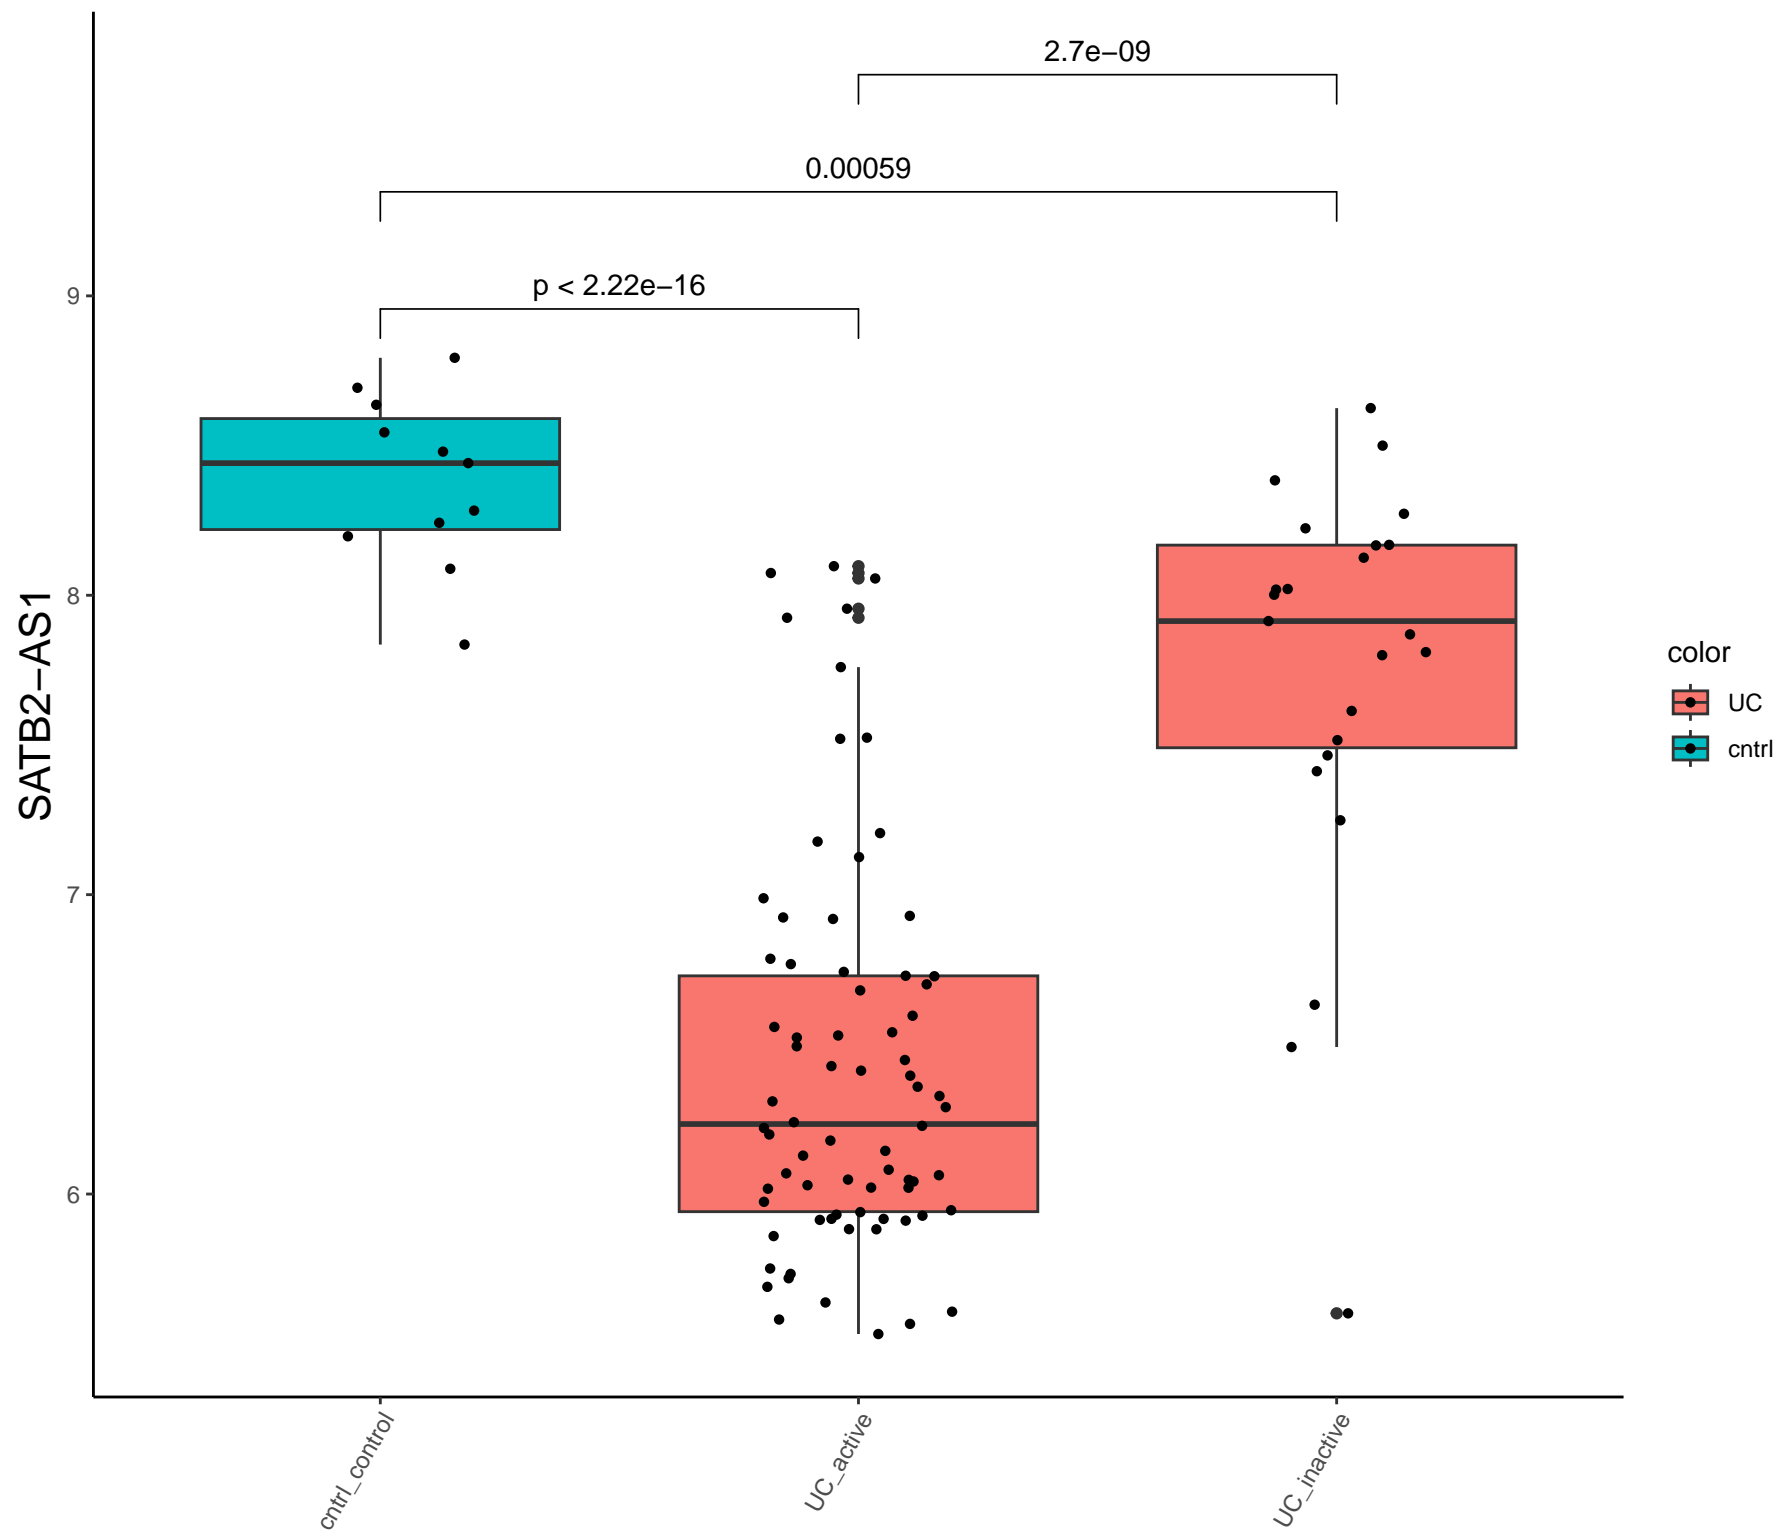

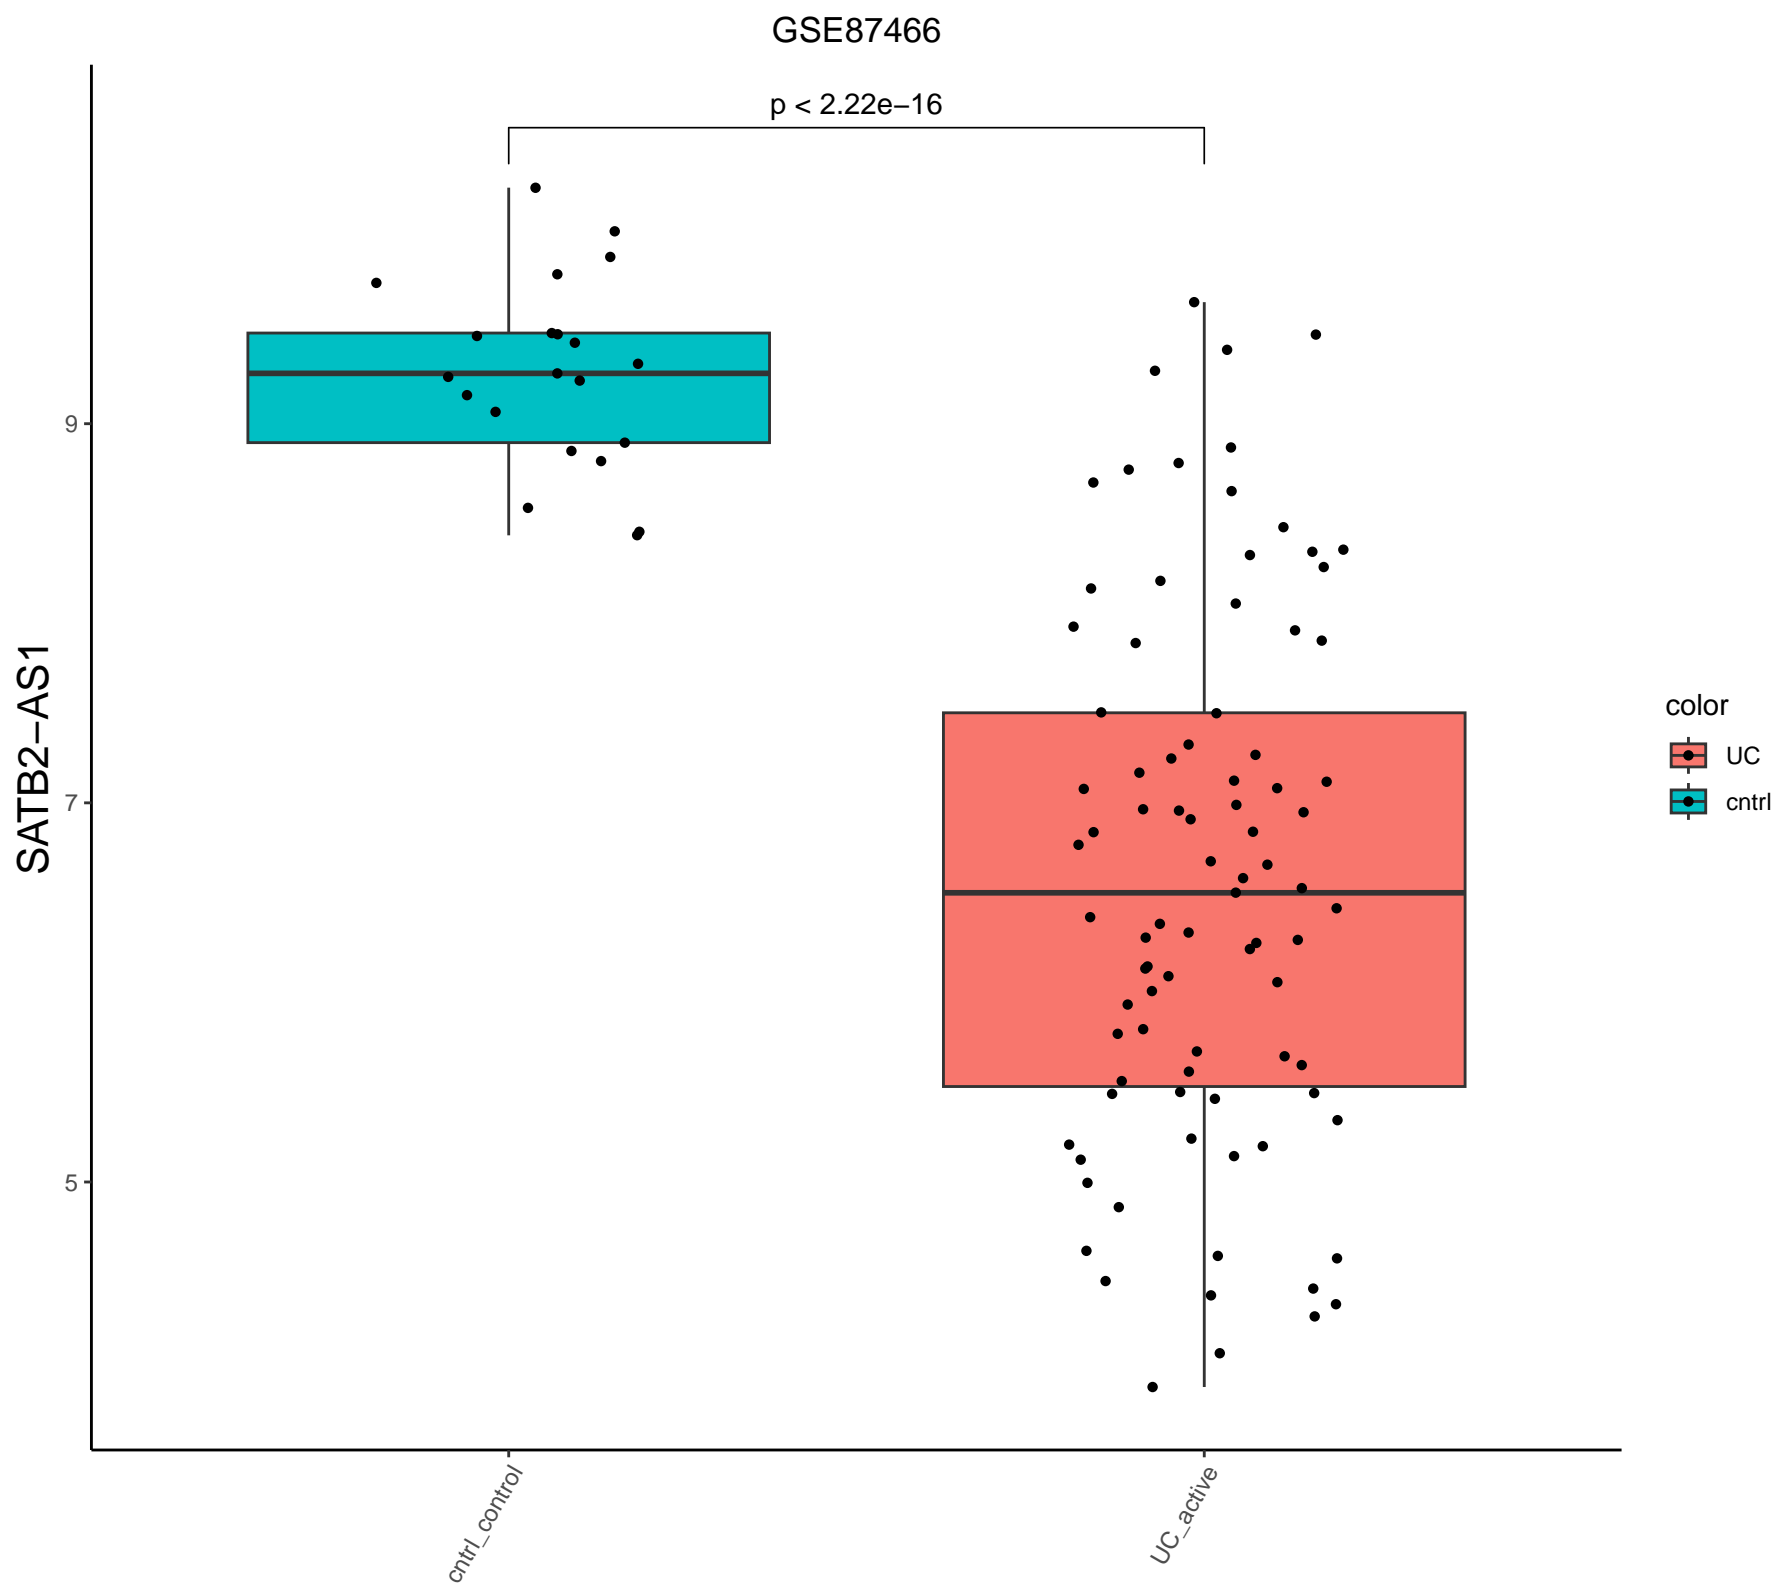

GSE107499

TP53TG1

1.2e-14

UC\_Lesional

UC\_Non-lesional

color

Lesional  
Non-lesional

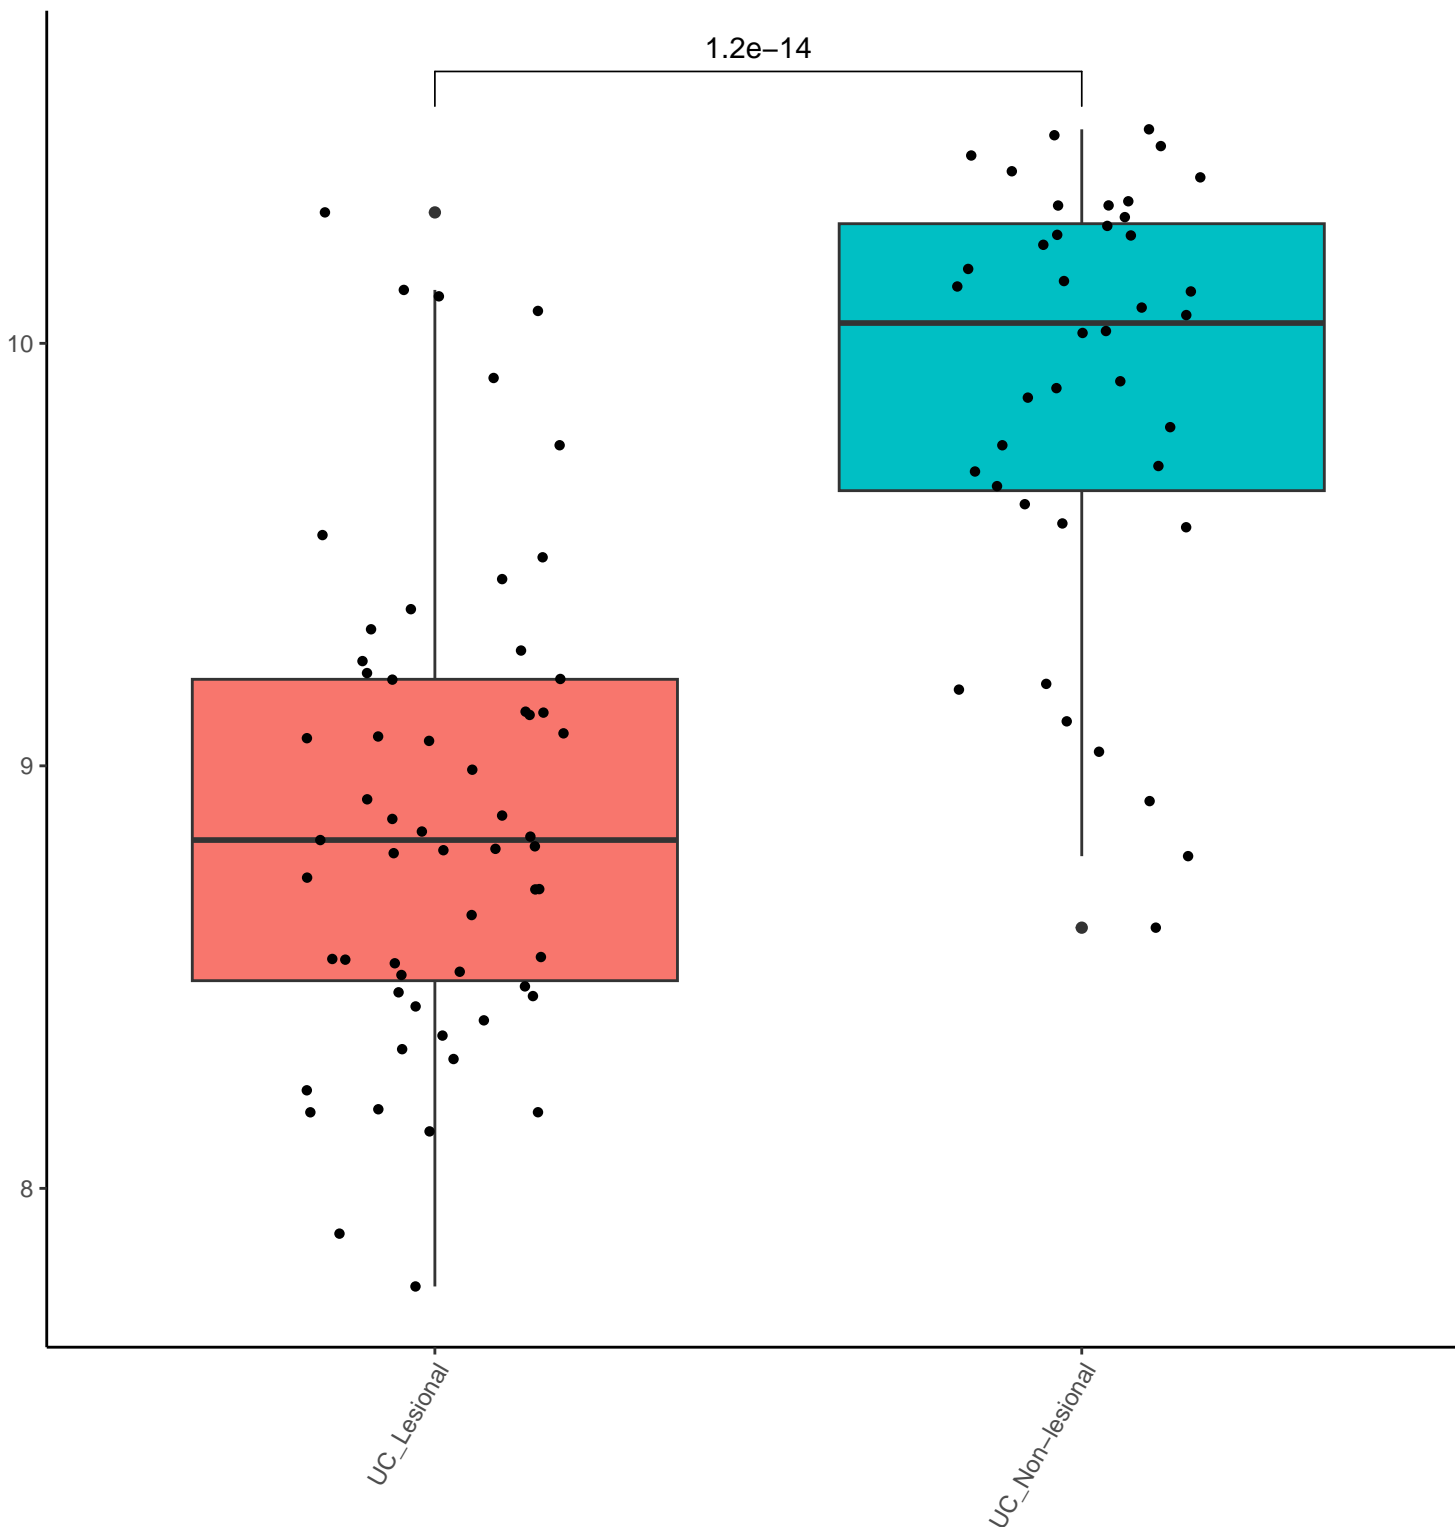

GSE109142

TP53TG1

8.3e-11

color

UC

cntrl

cntrl\_control

UC\_active

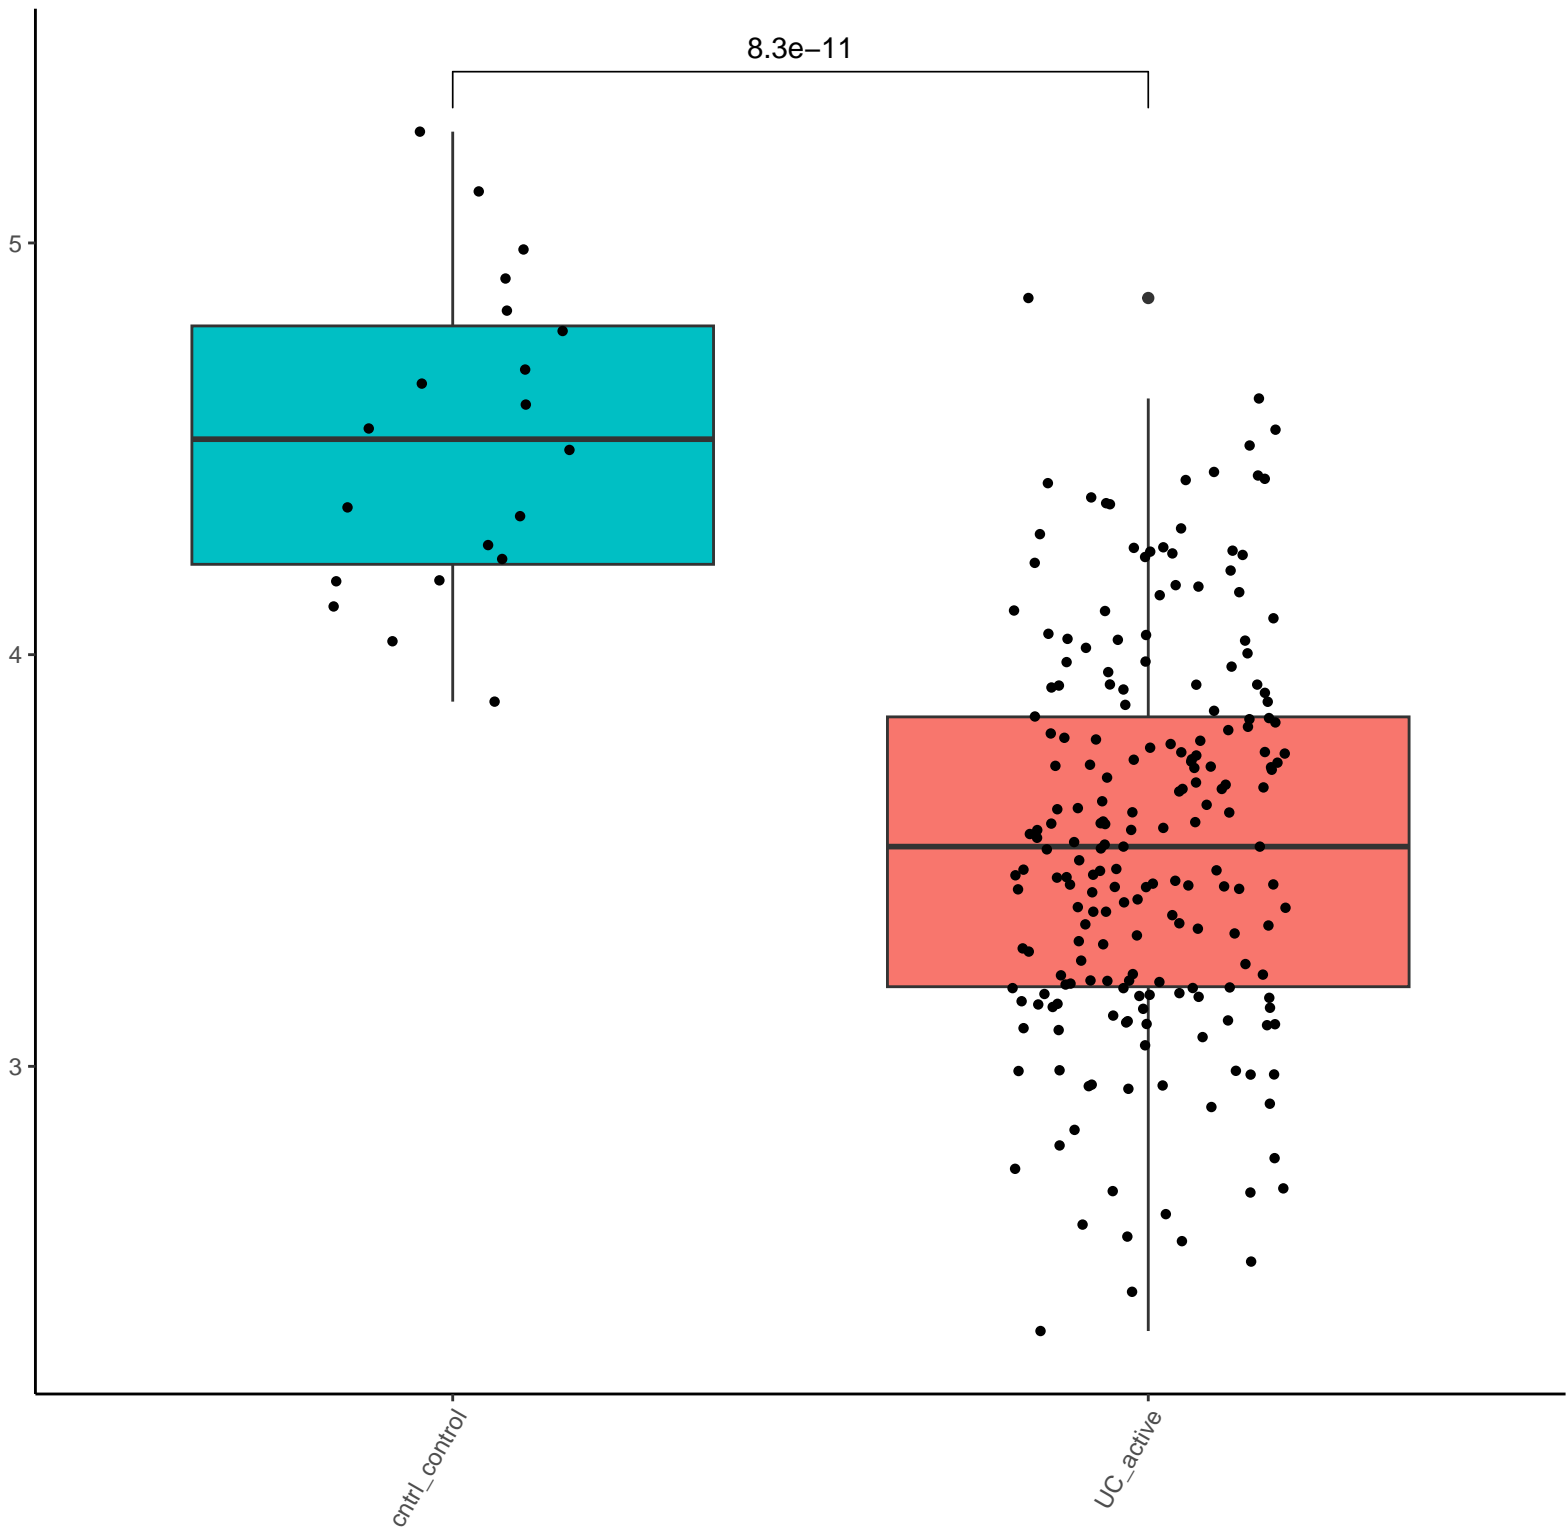

GSE128682

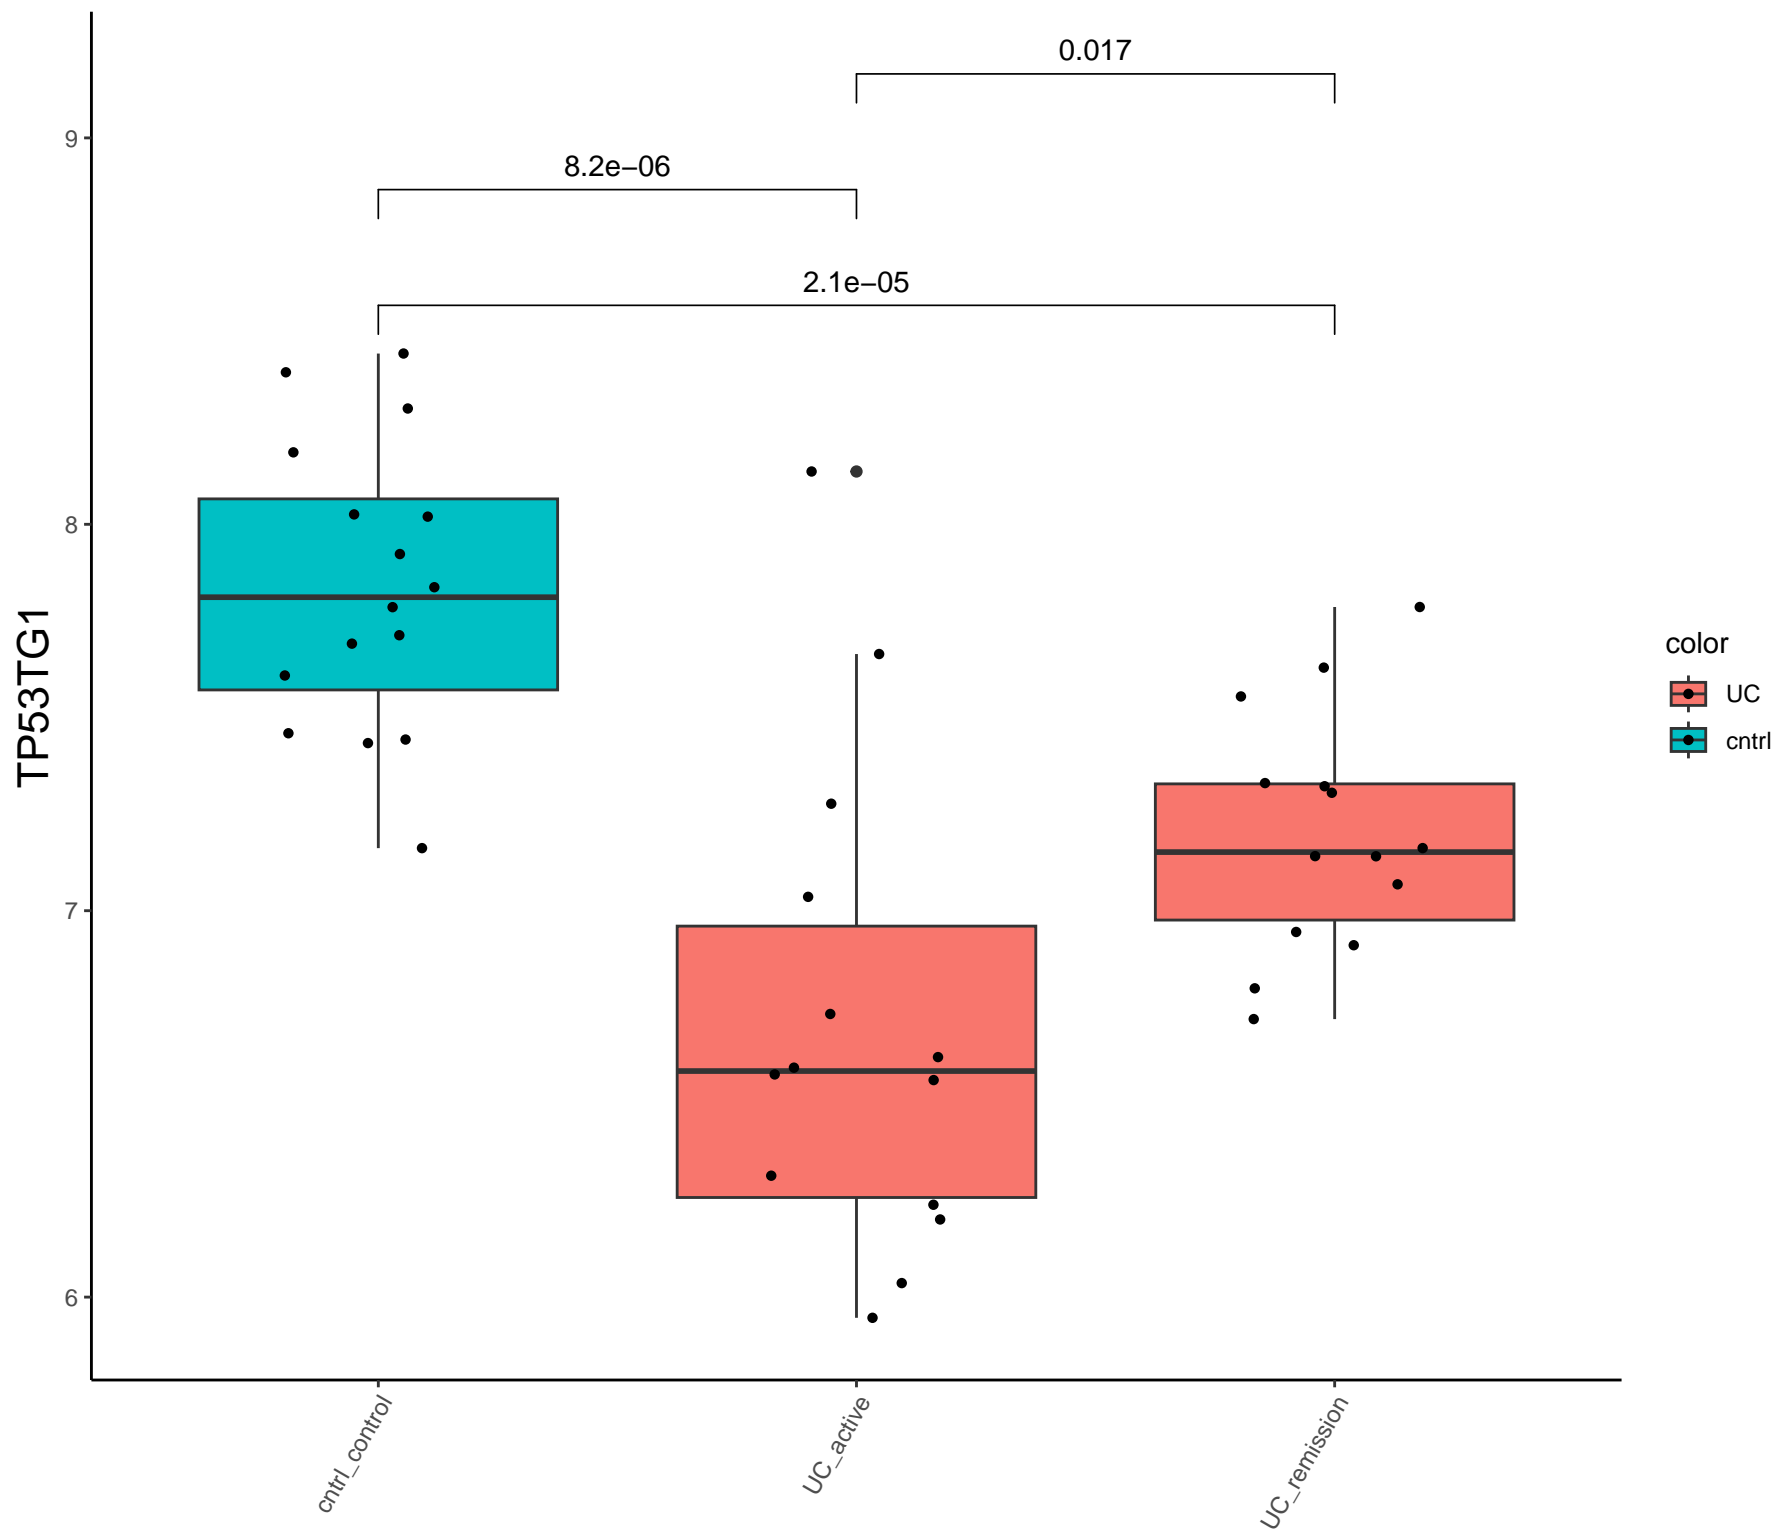

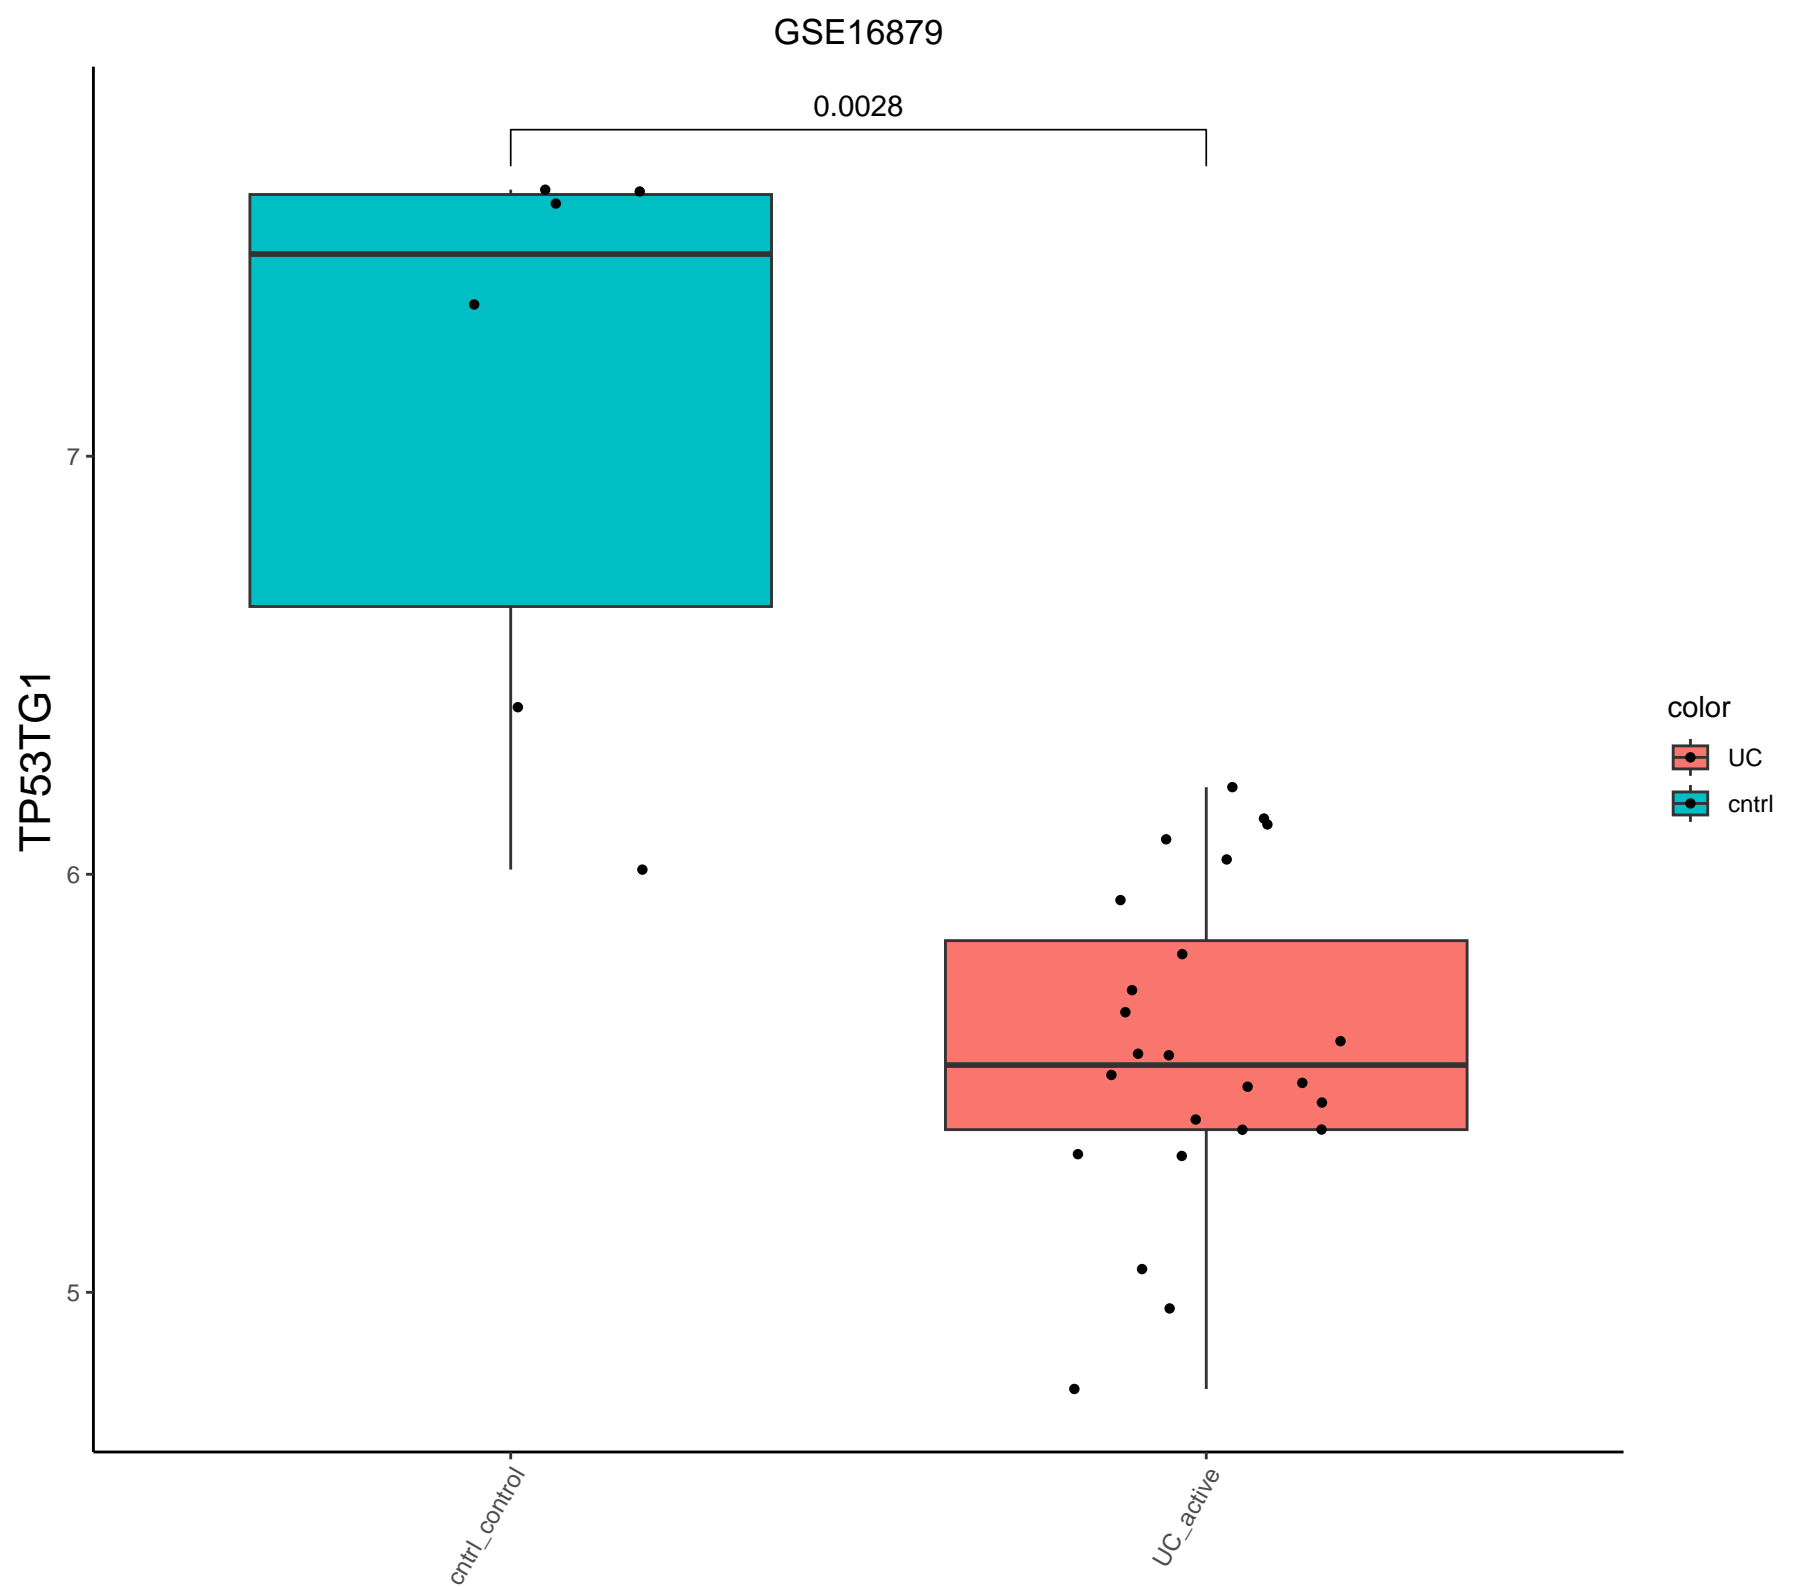



GSE206285

TP53TG1

0.055

color

UC  
cntrl

cntrl\_control

UC\_active

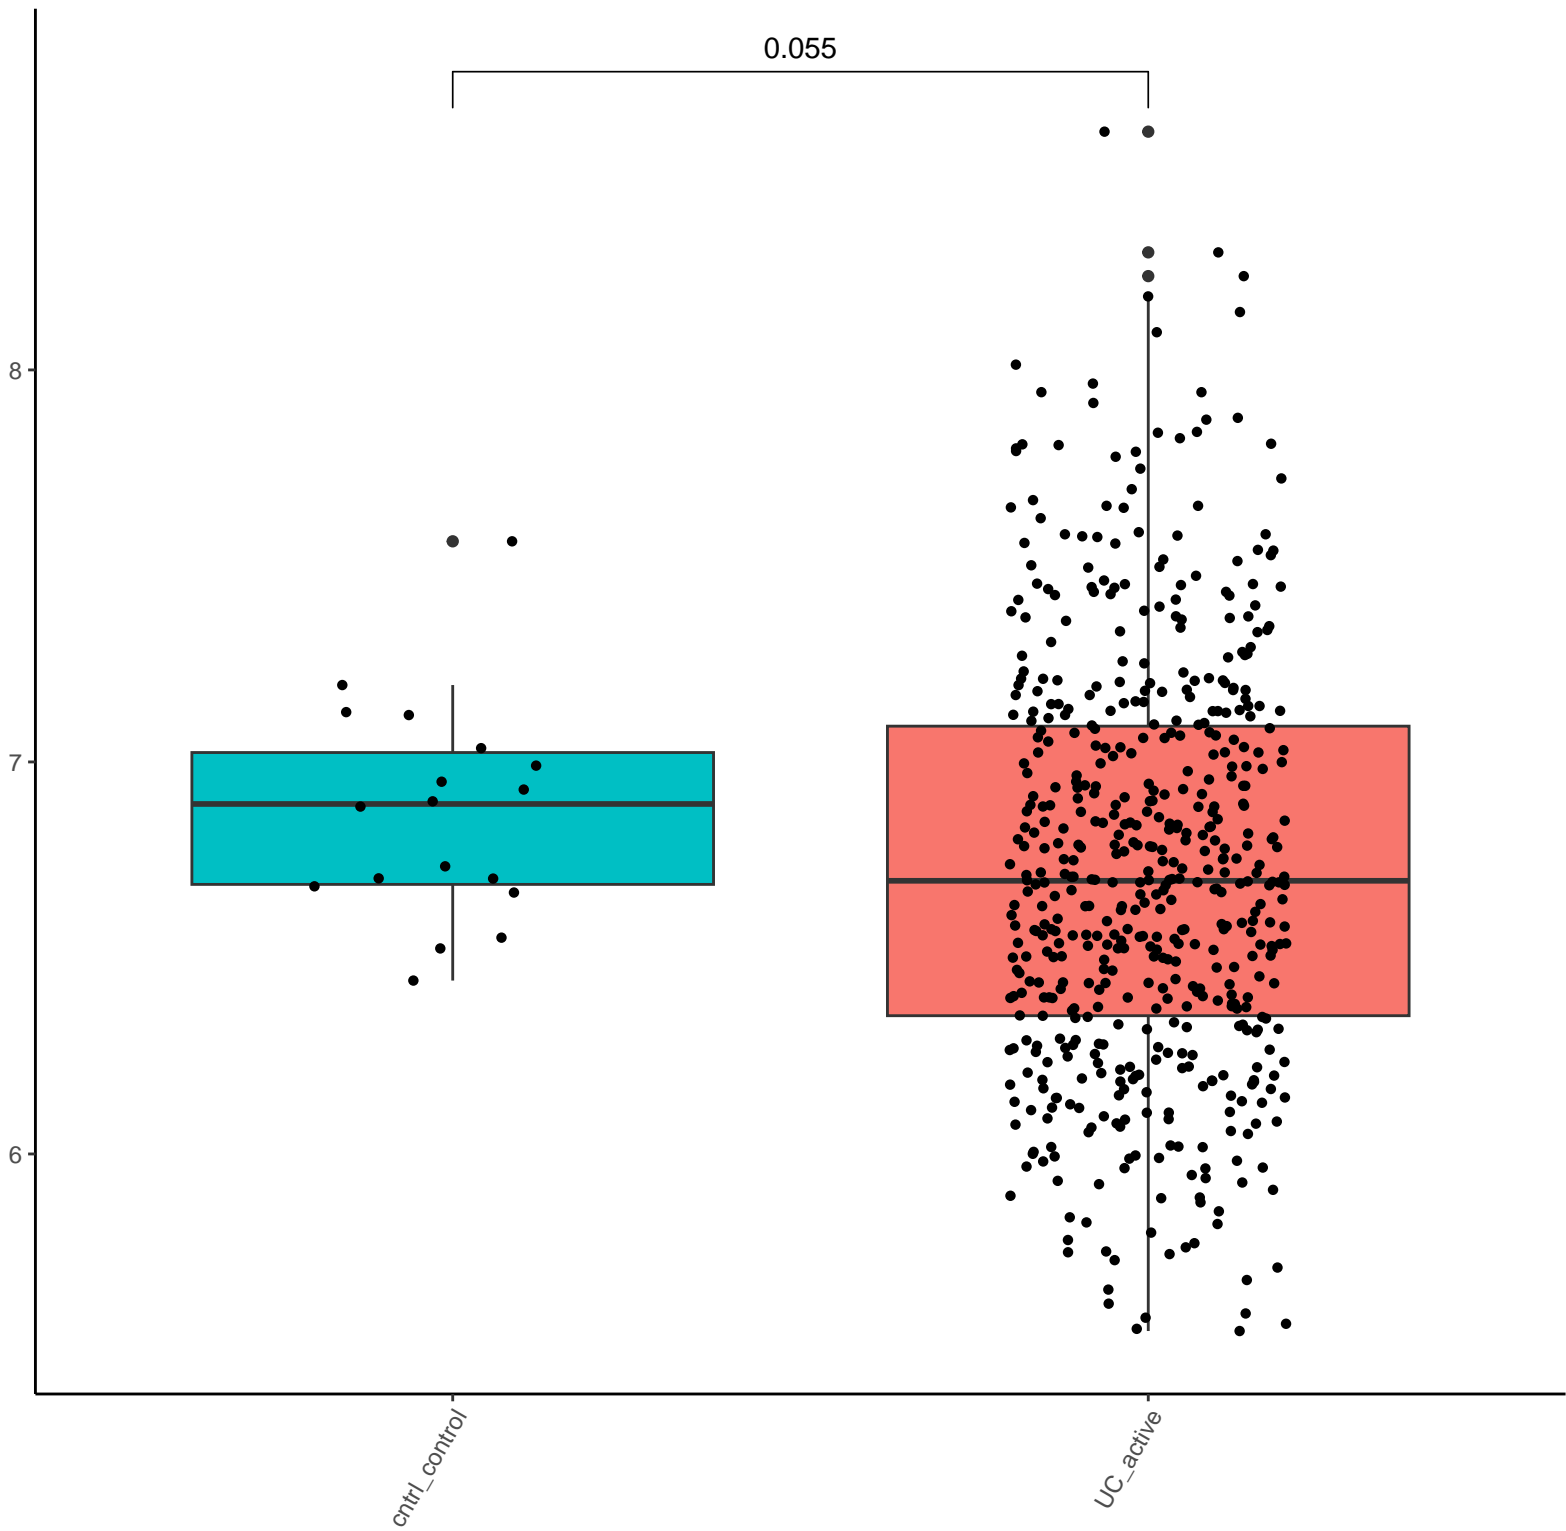

GSE47908

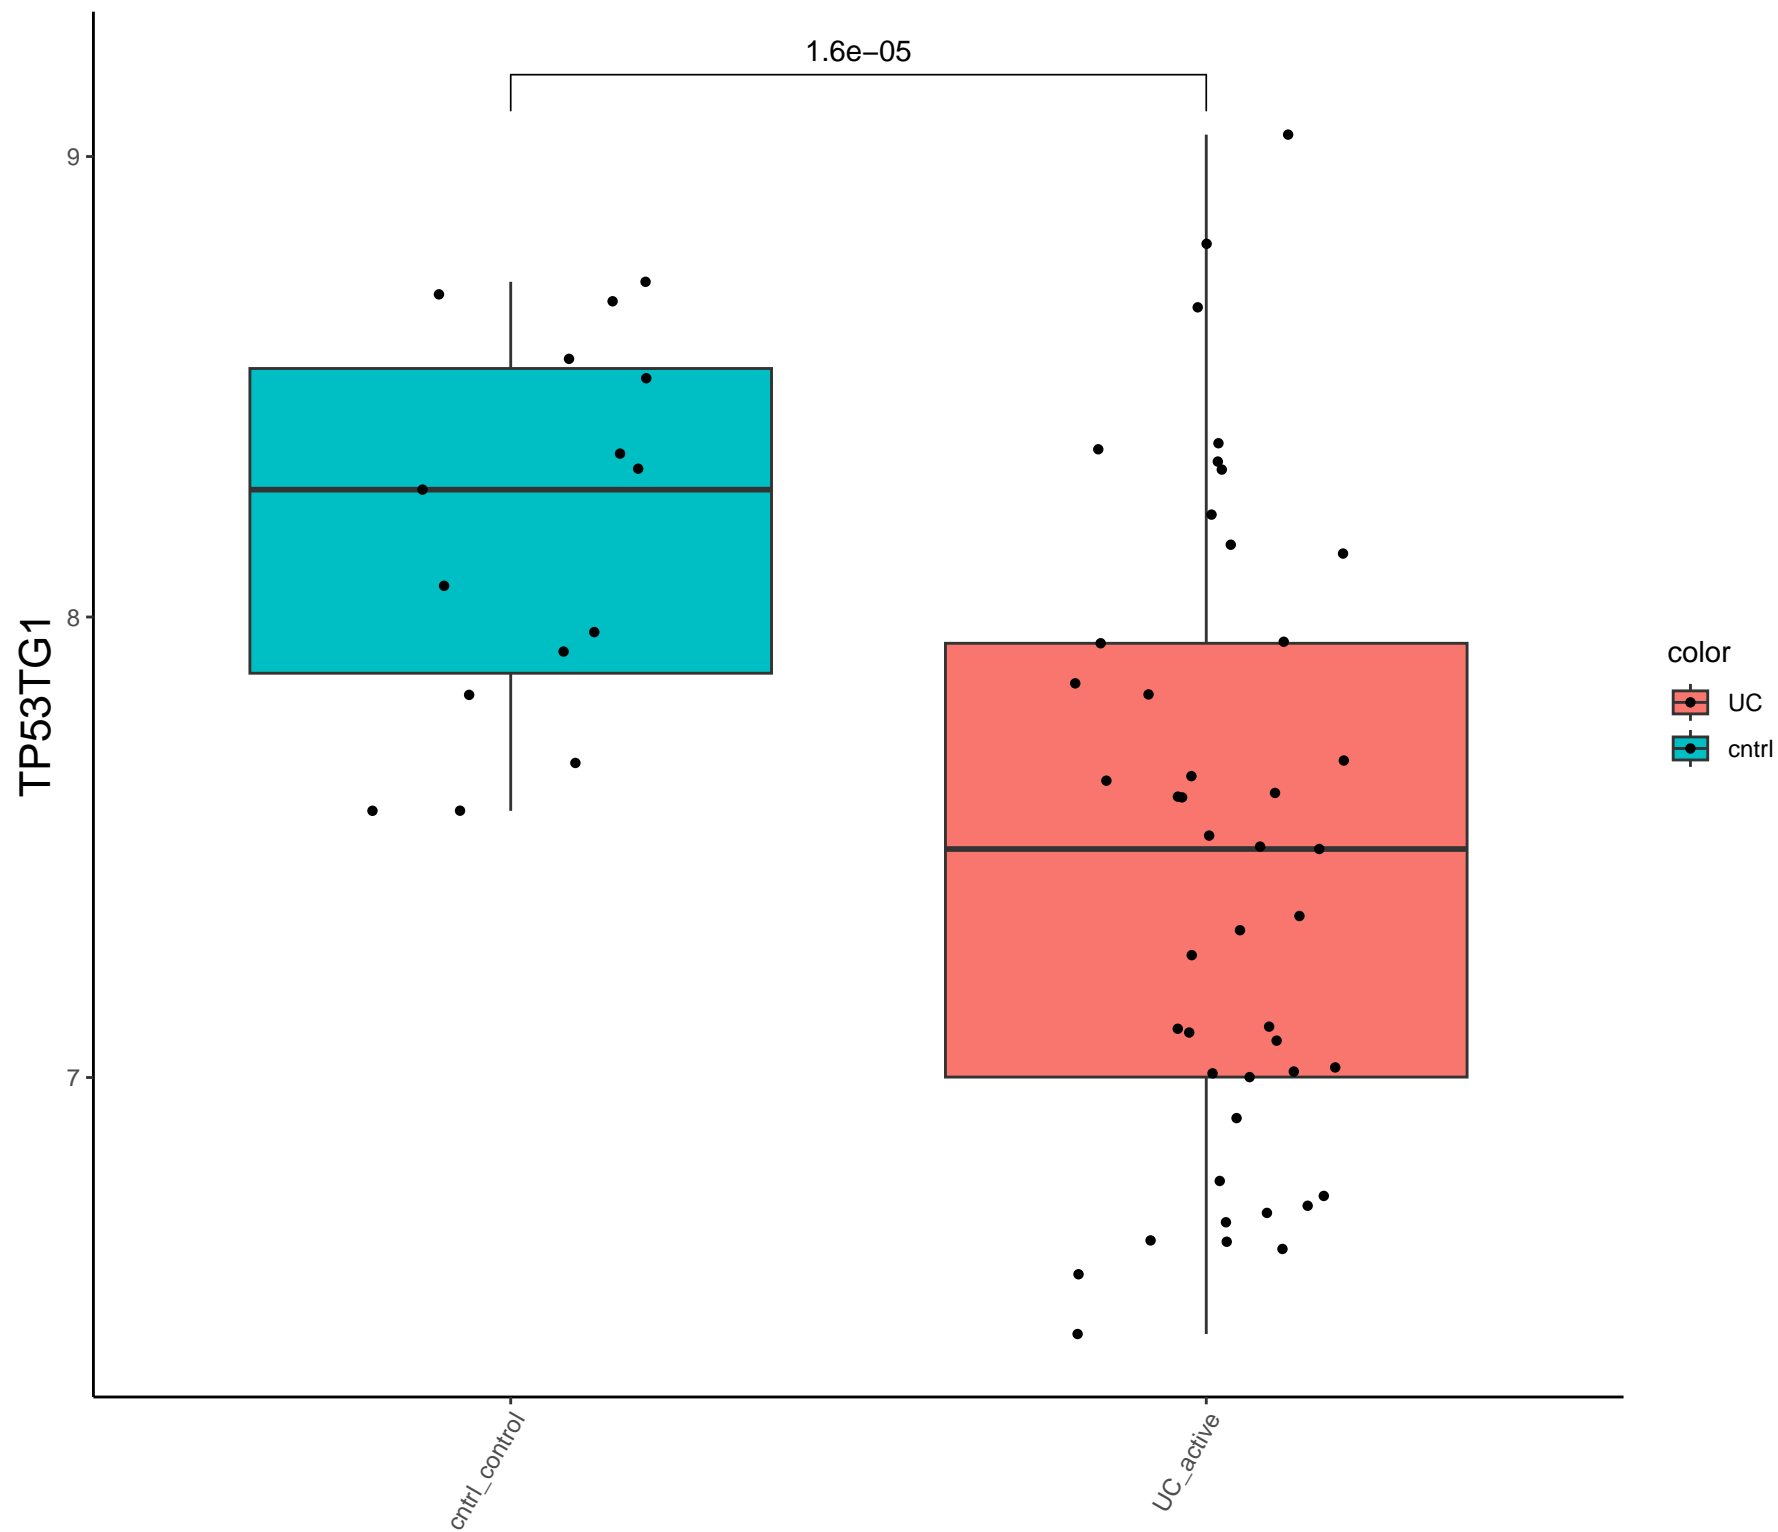

GSE59071

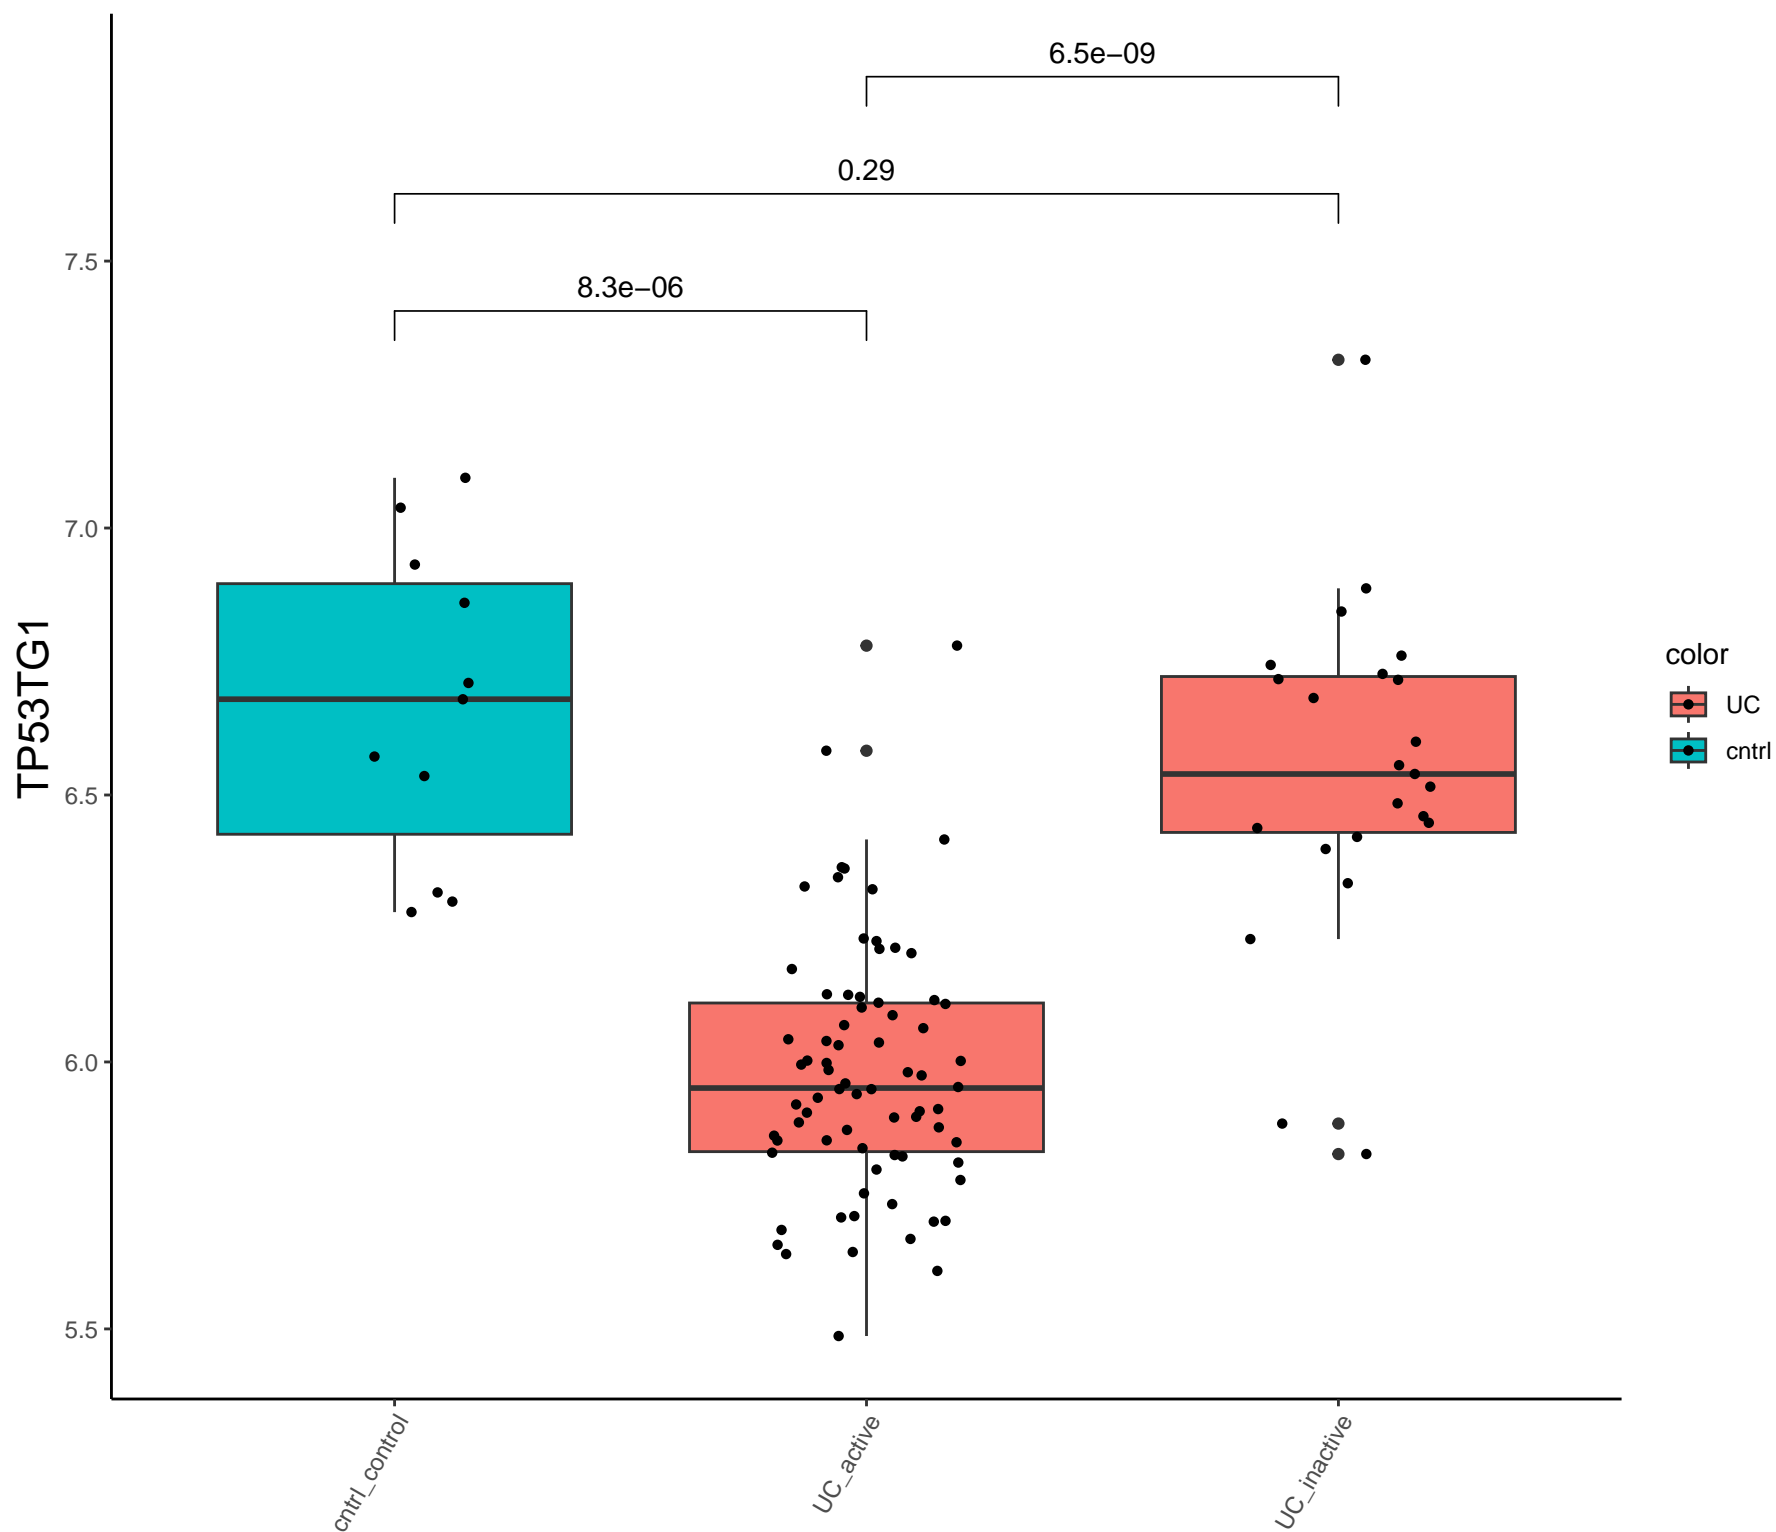

GSE87466

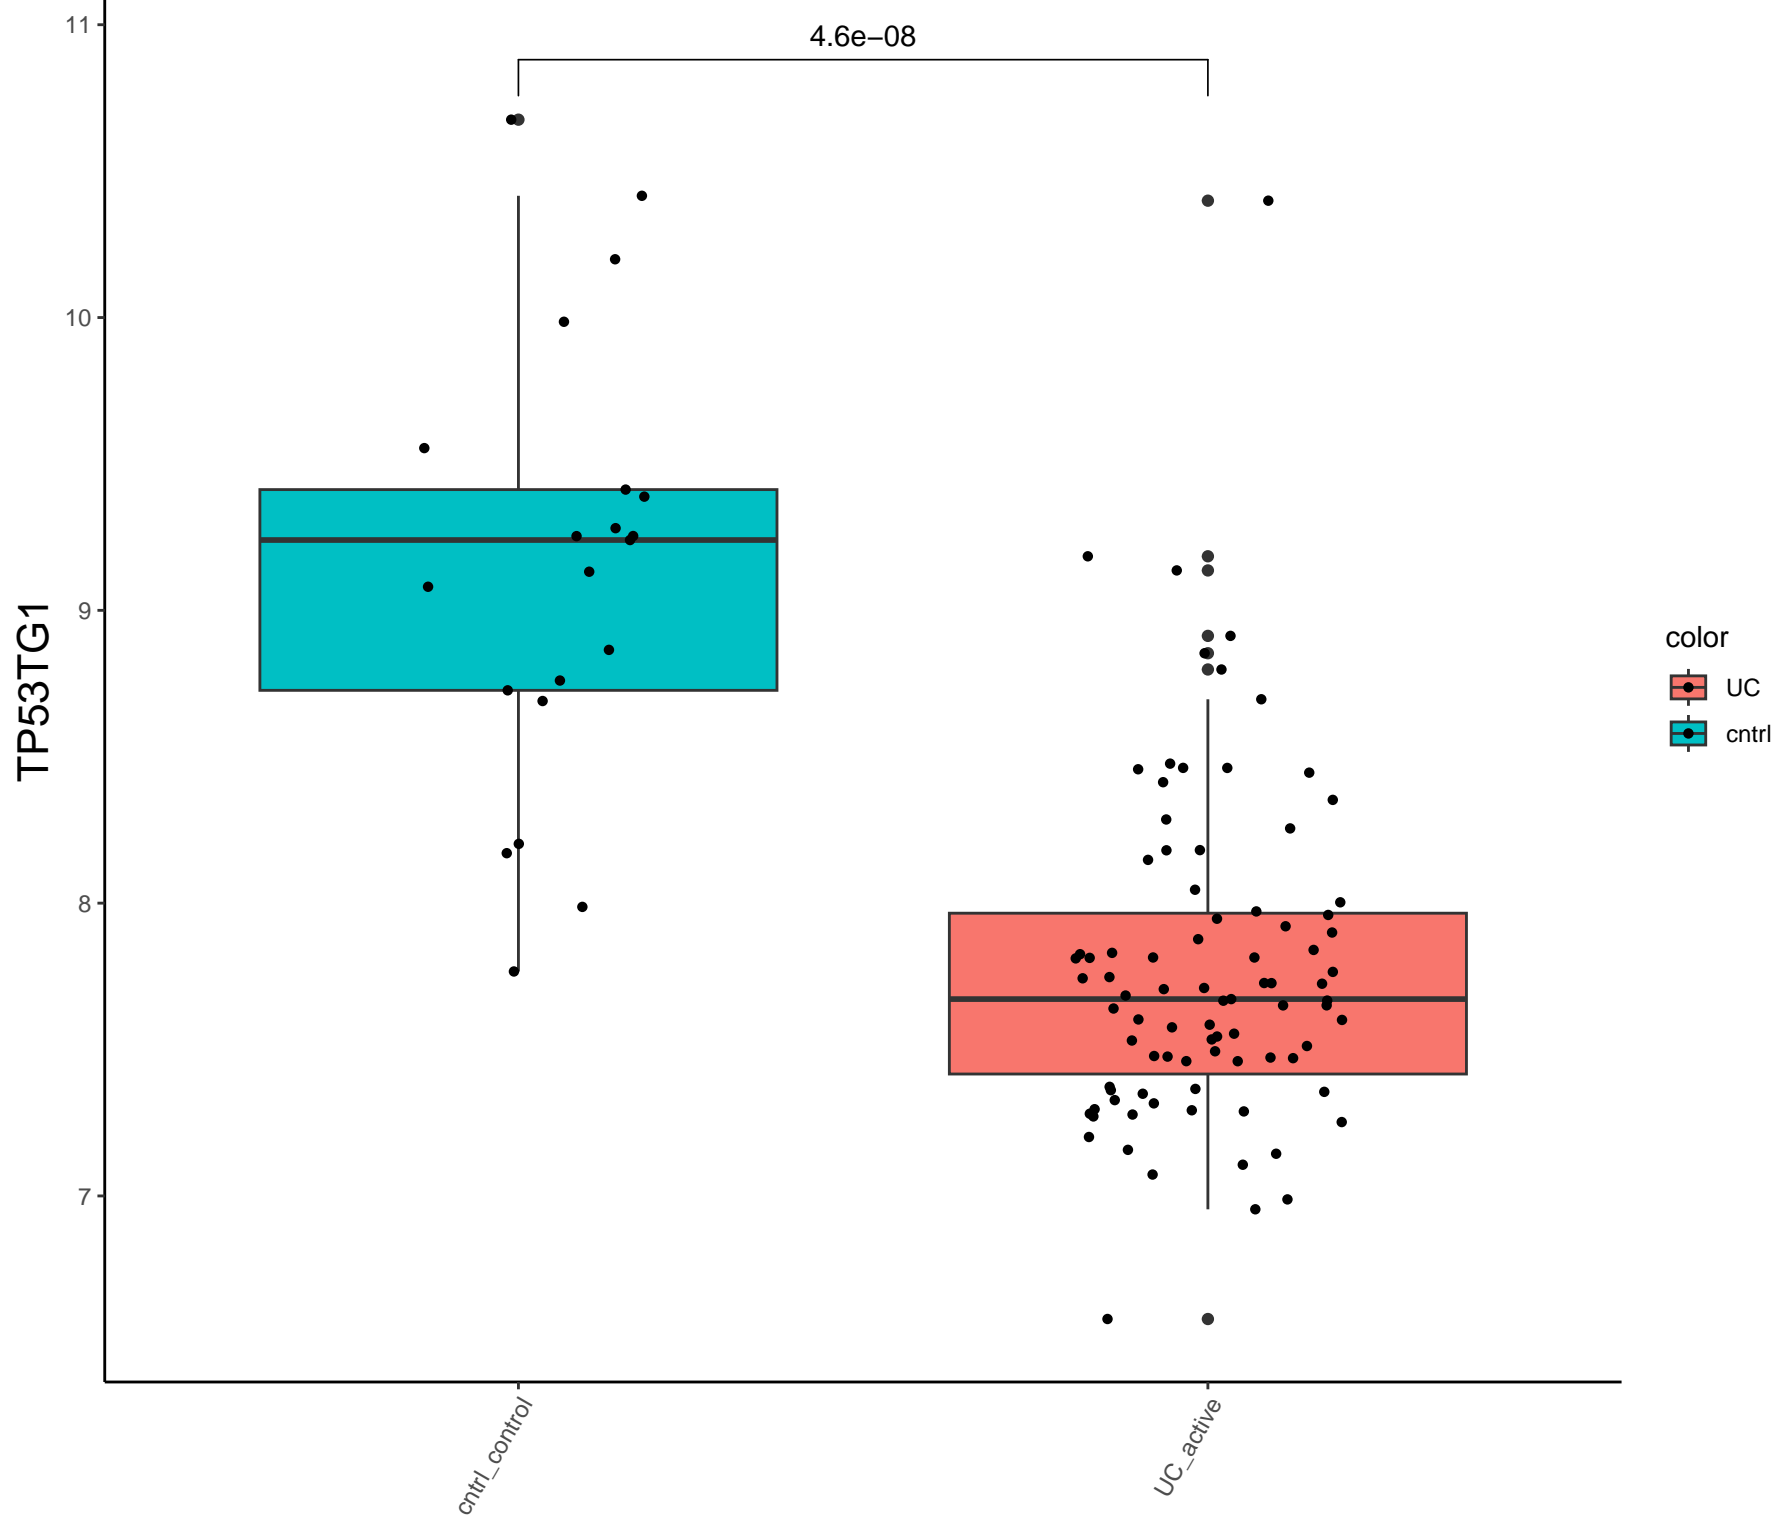

GSE92415

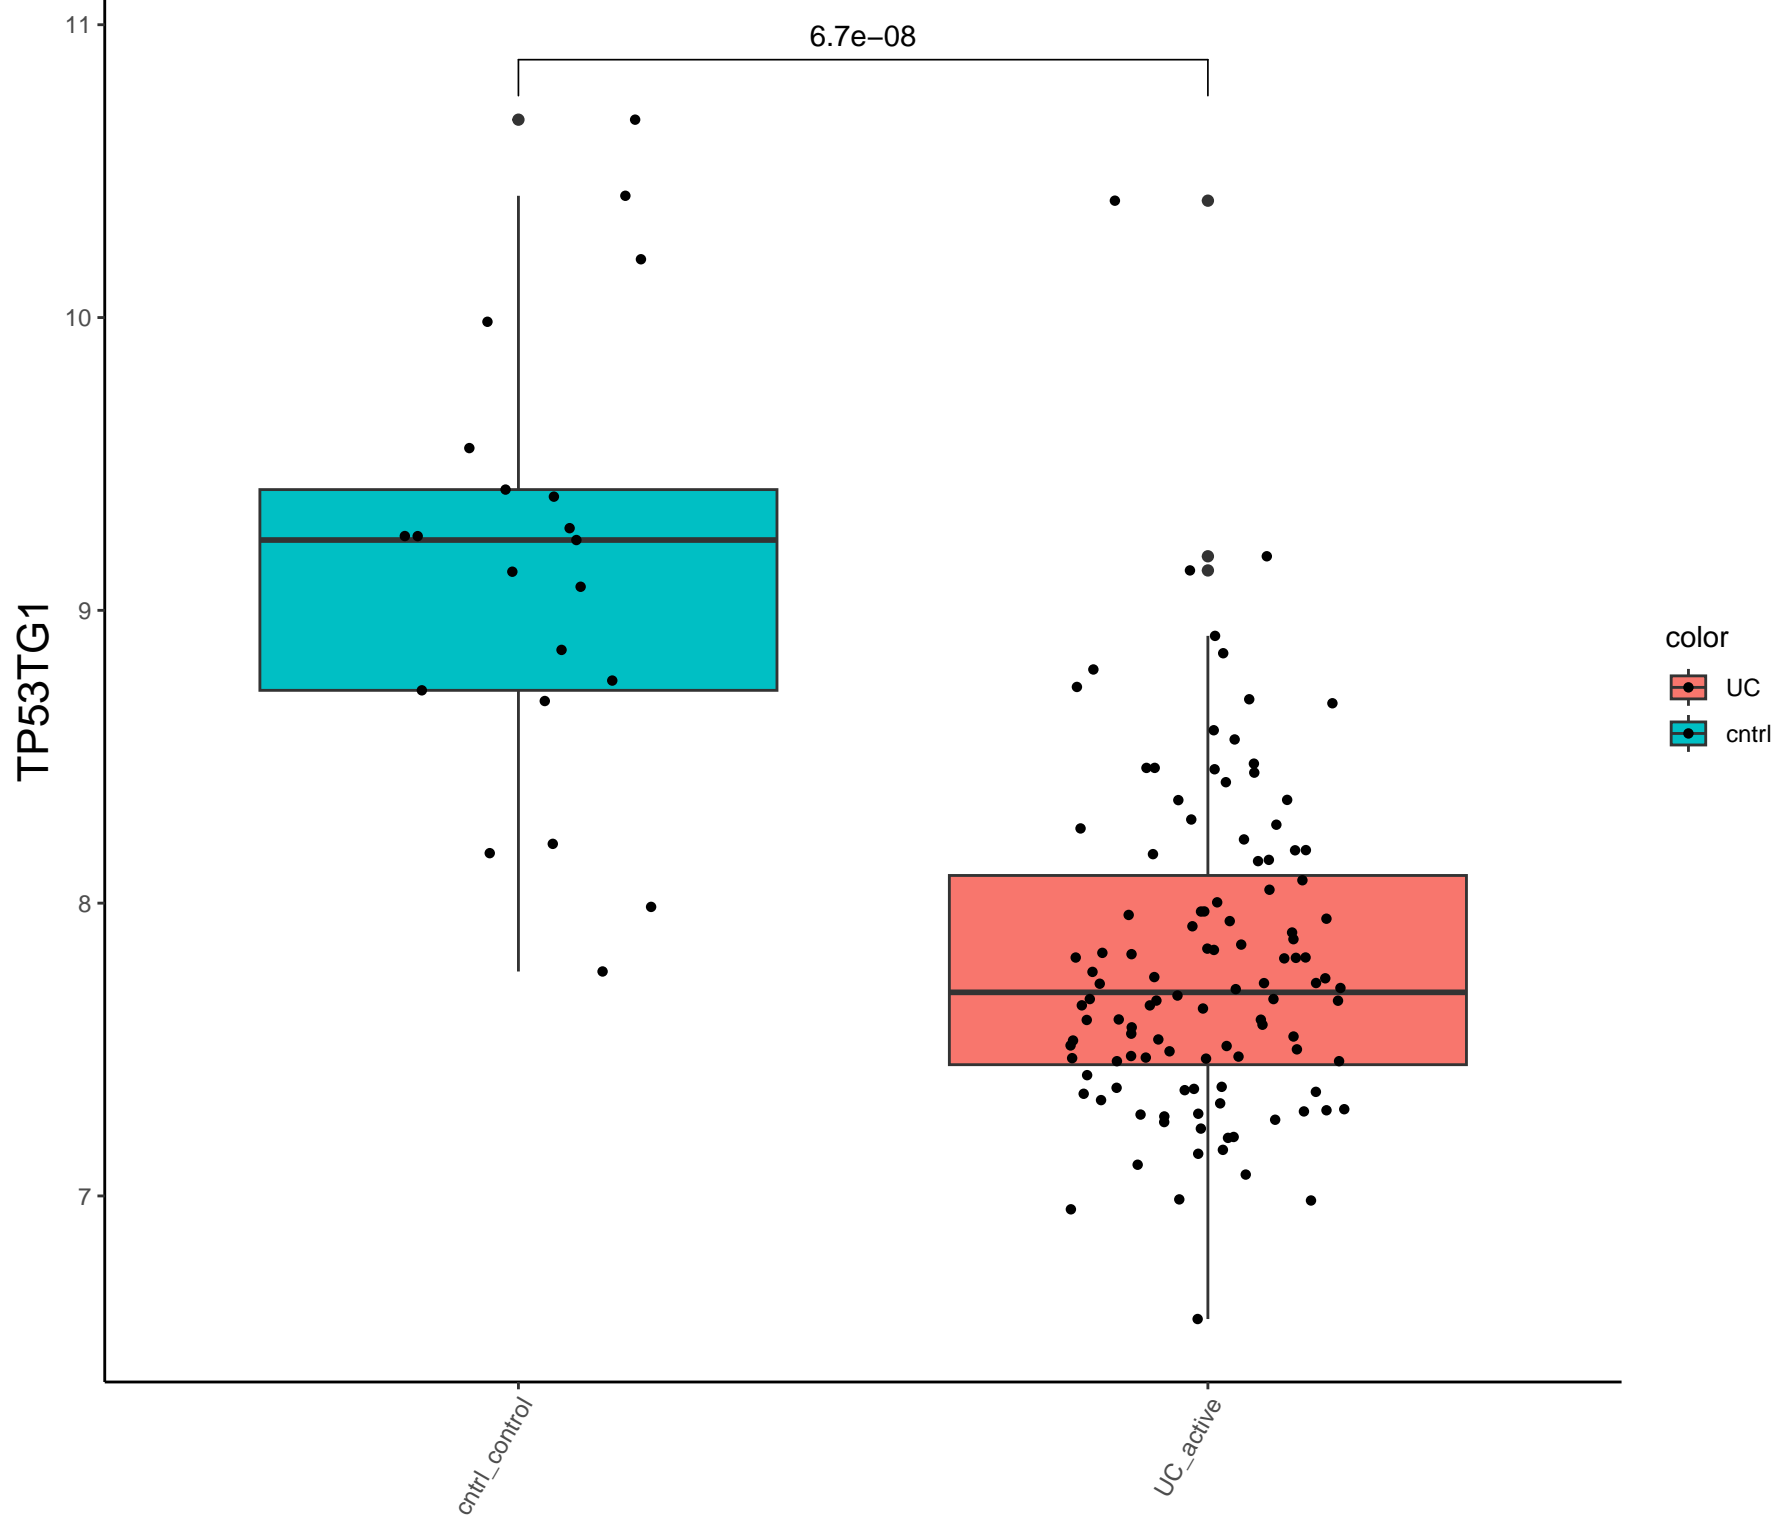

GSE109142

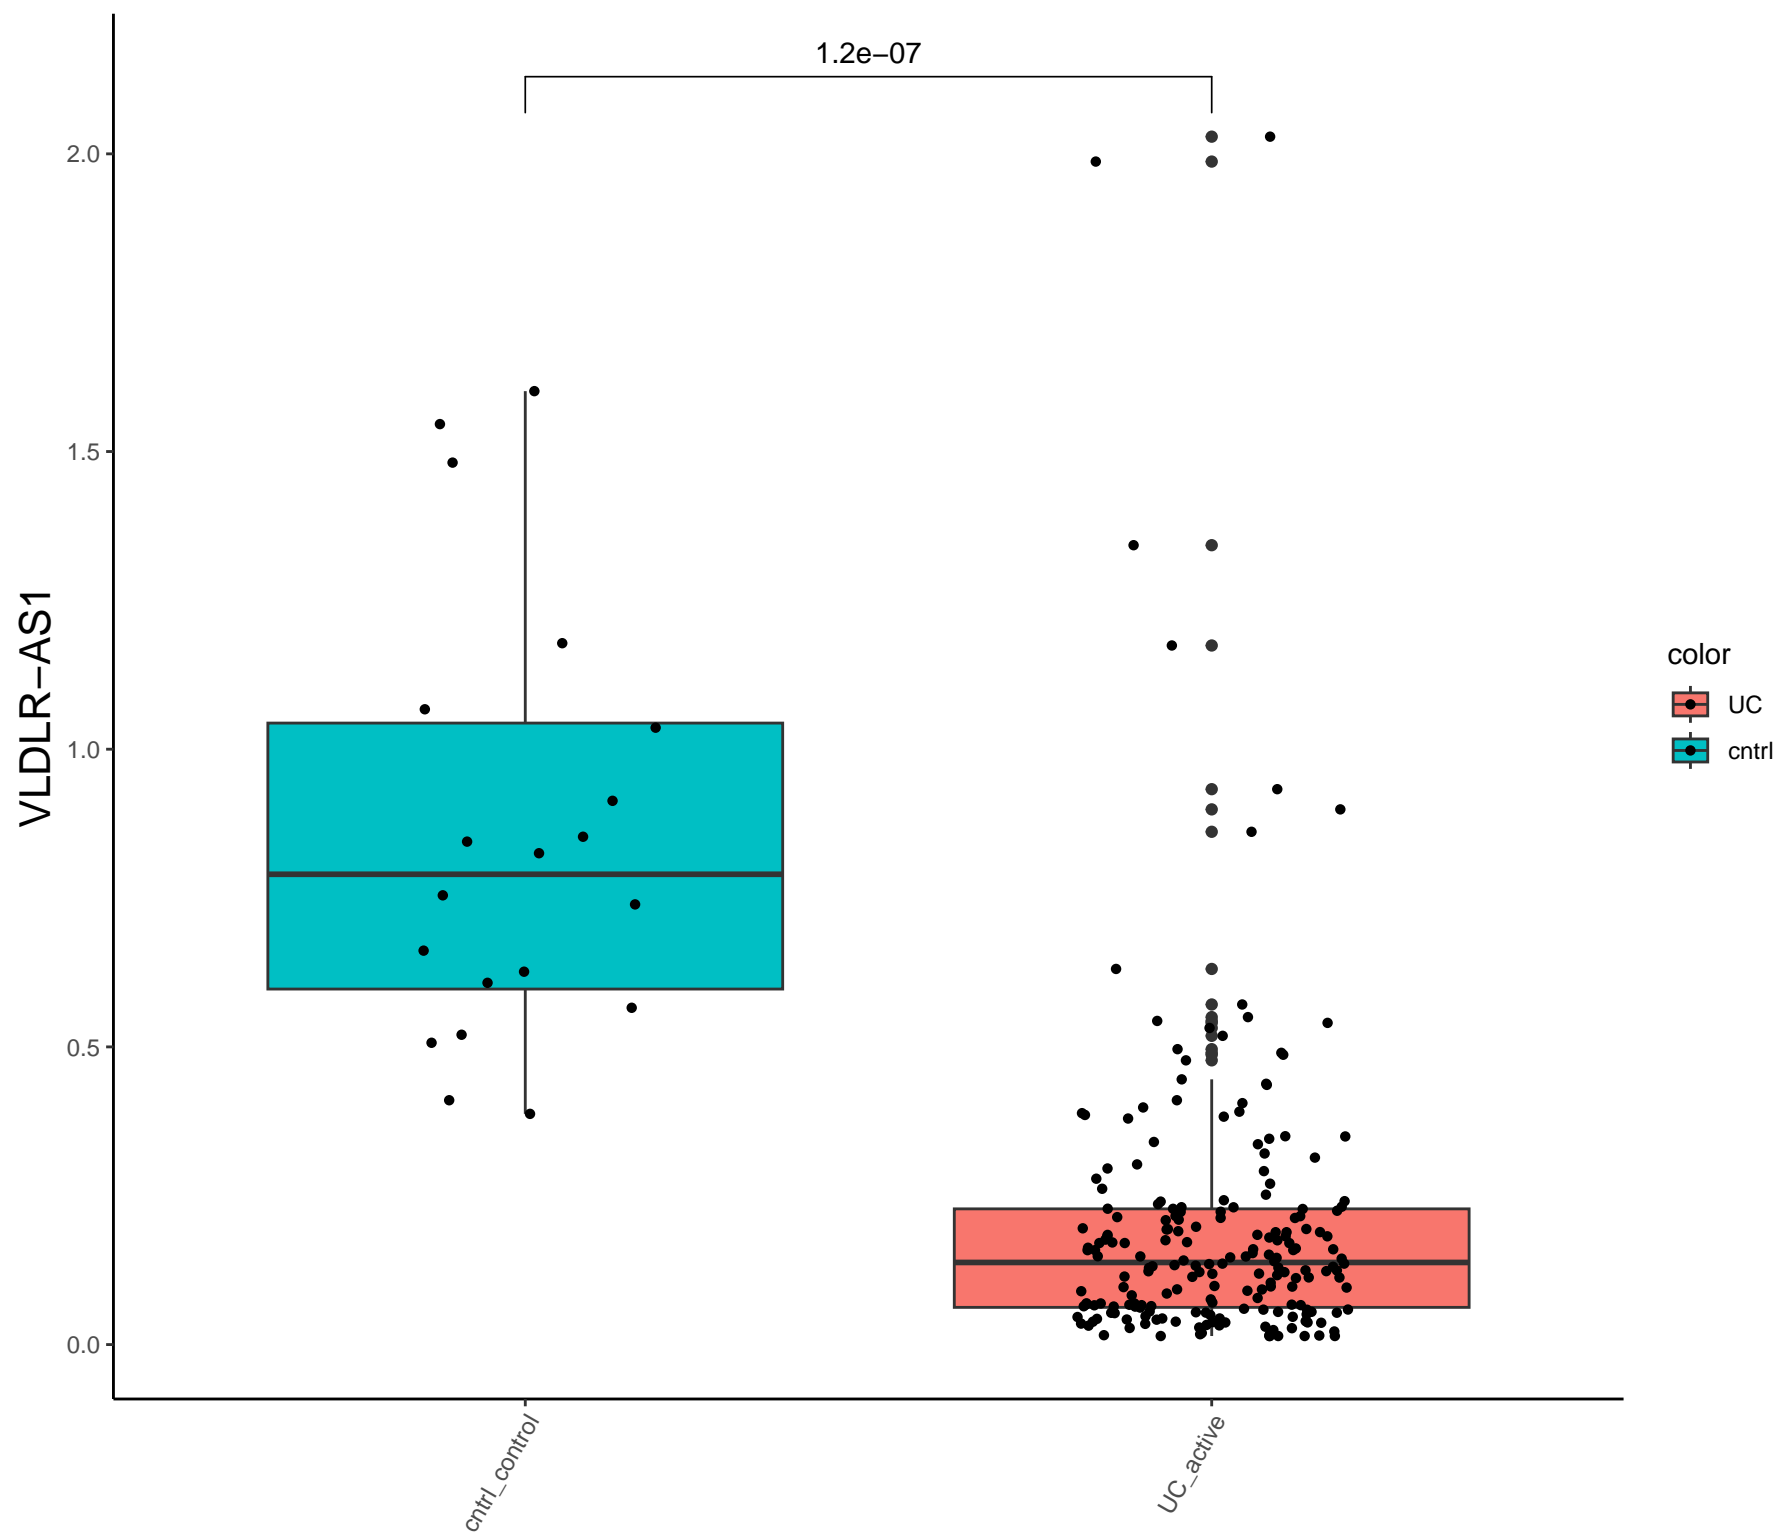

GSE128682

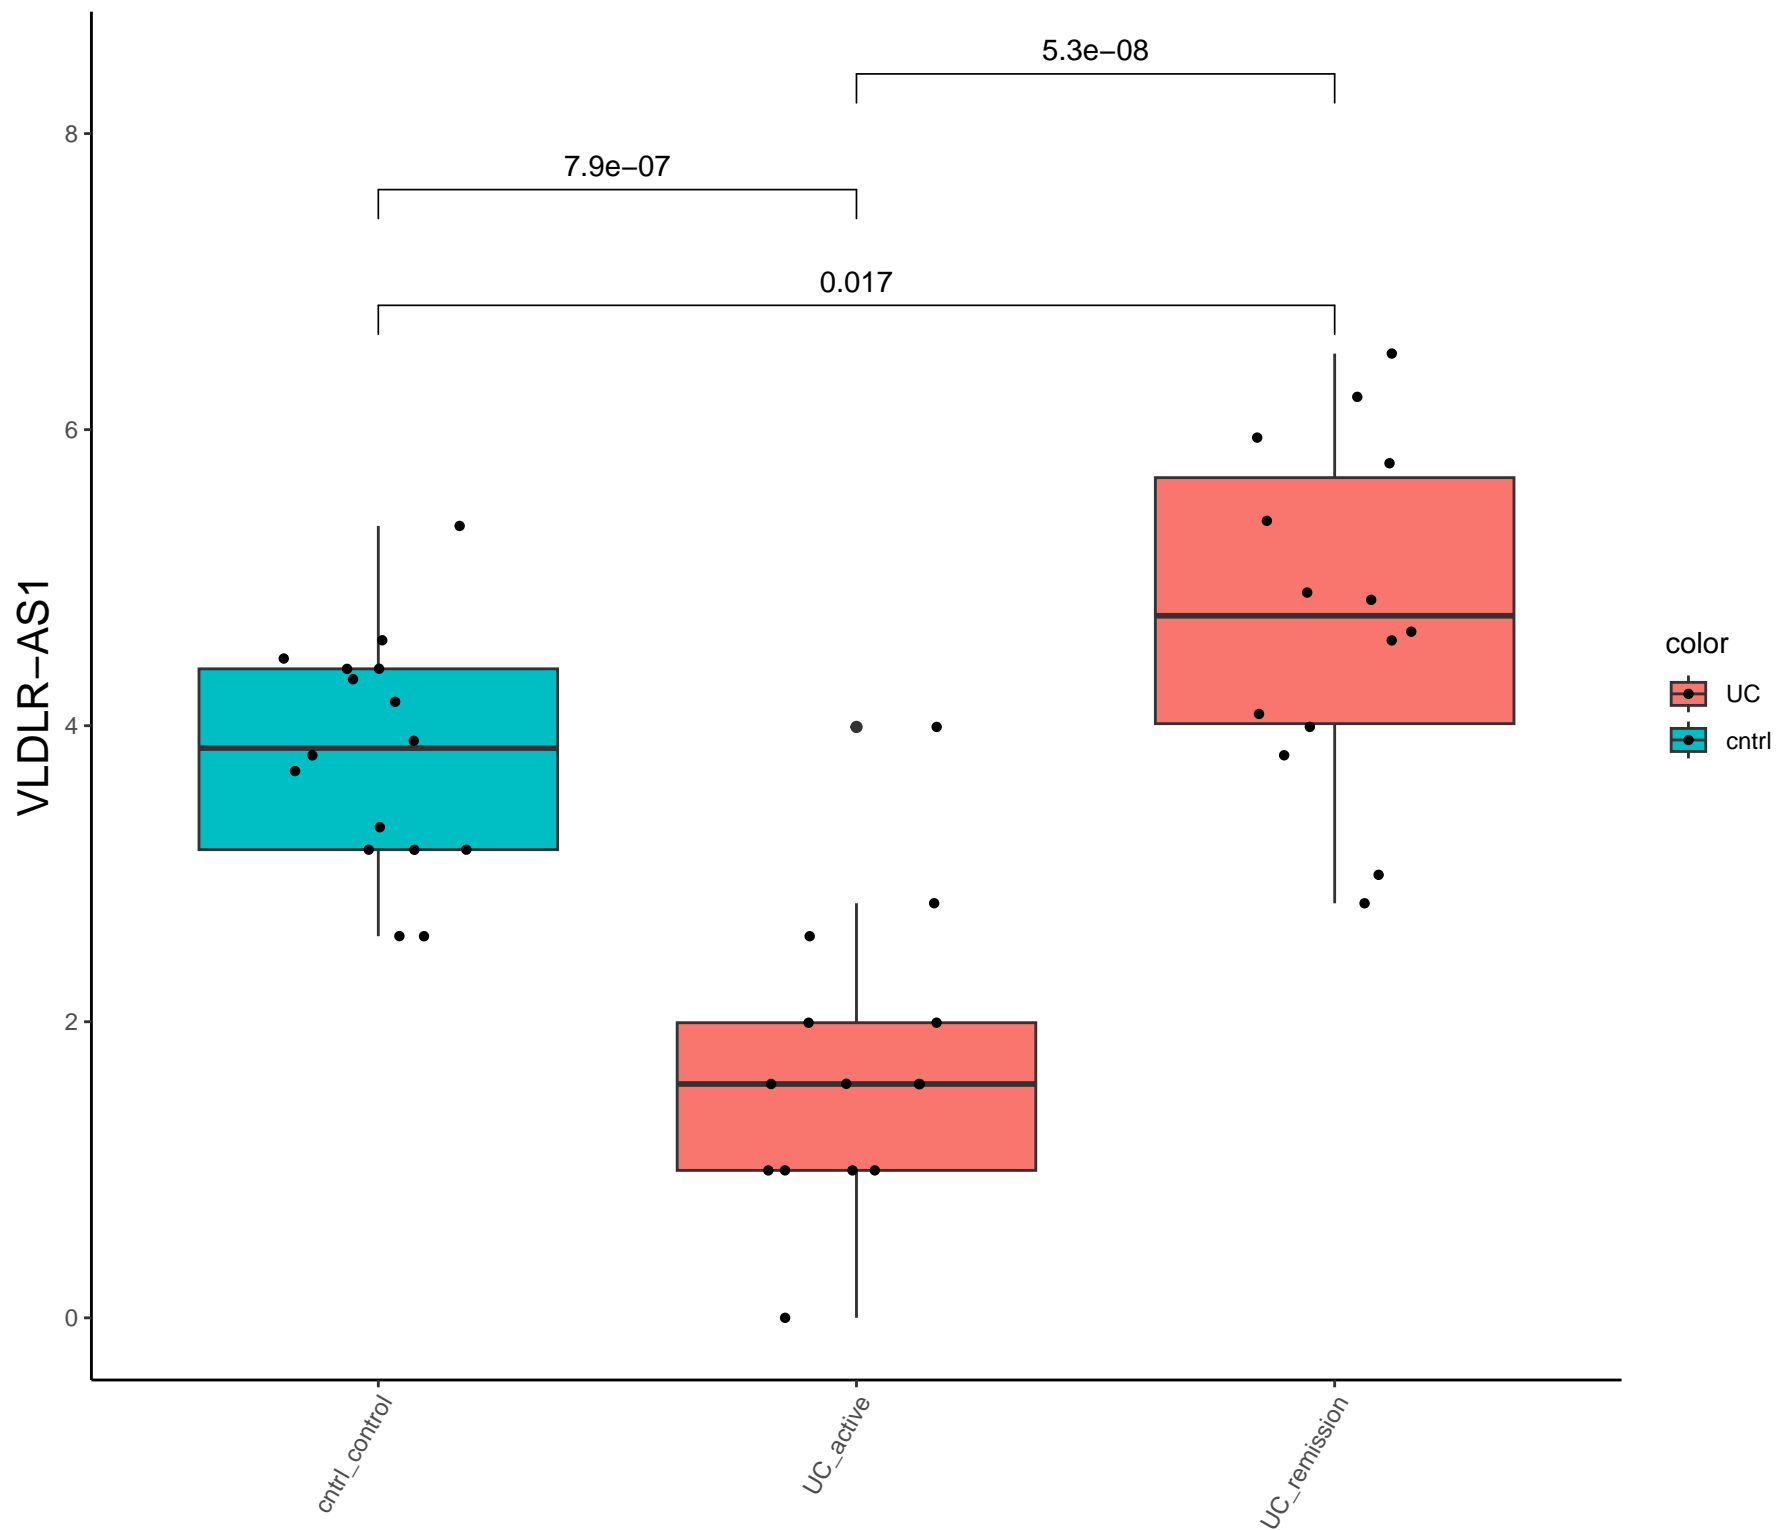

GSE47908

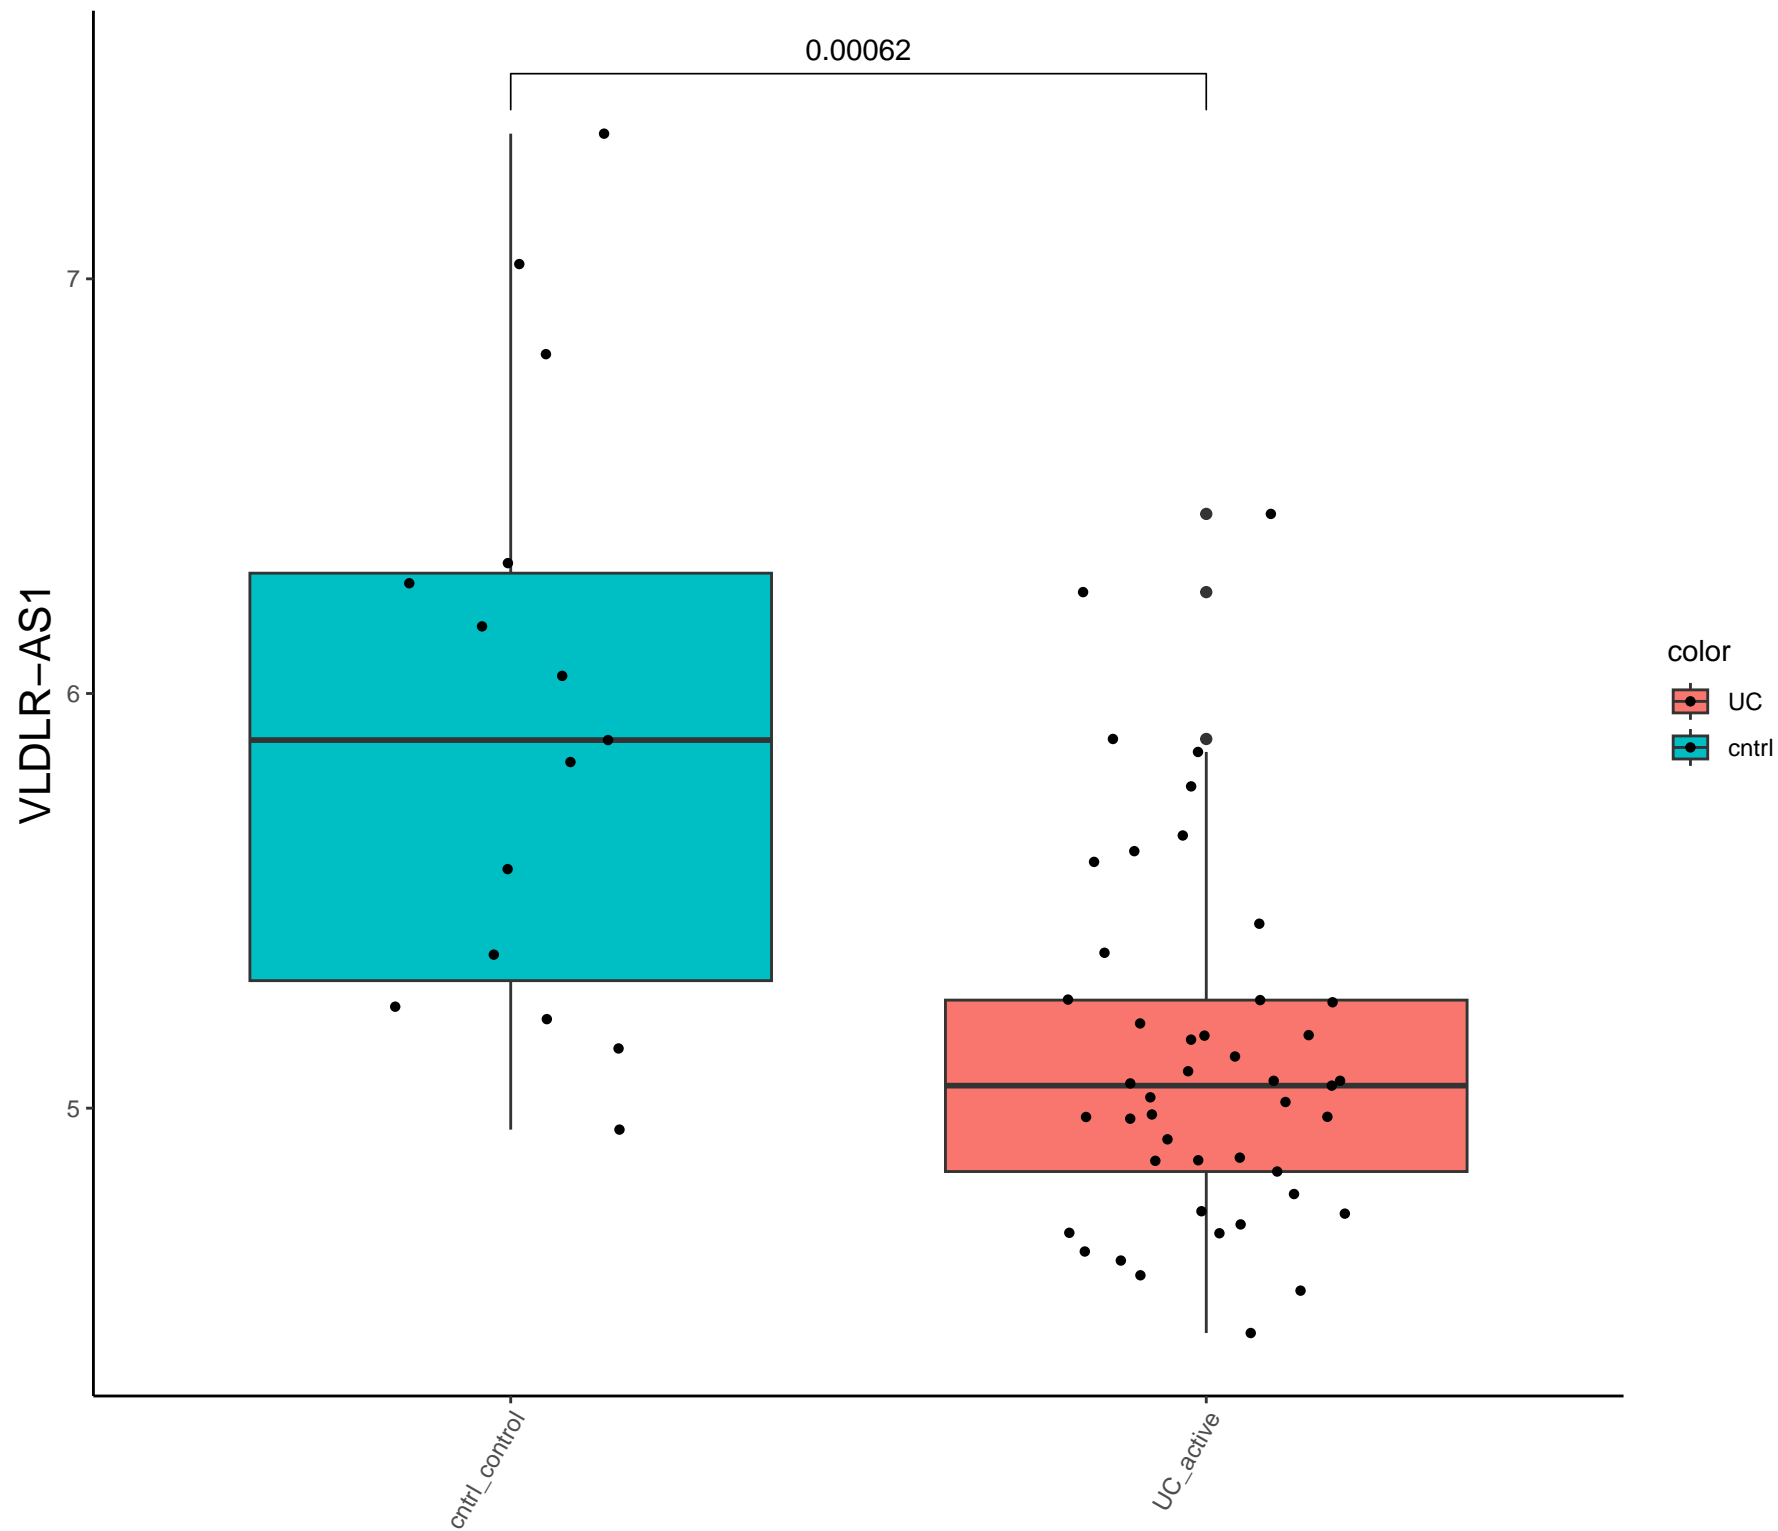



GSE59071

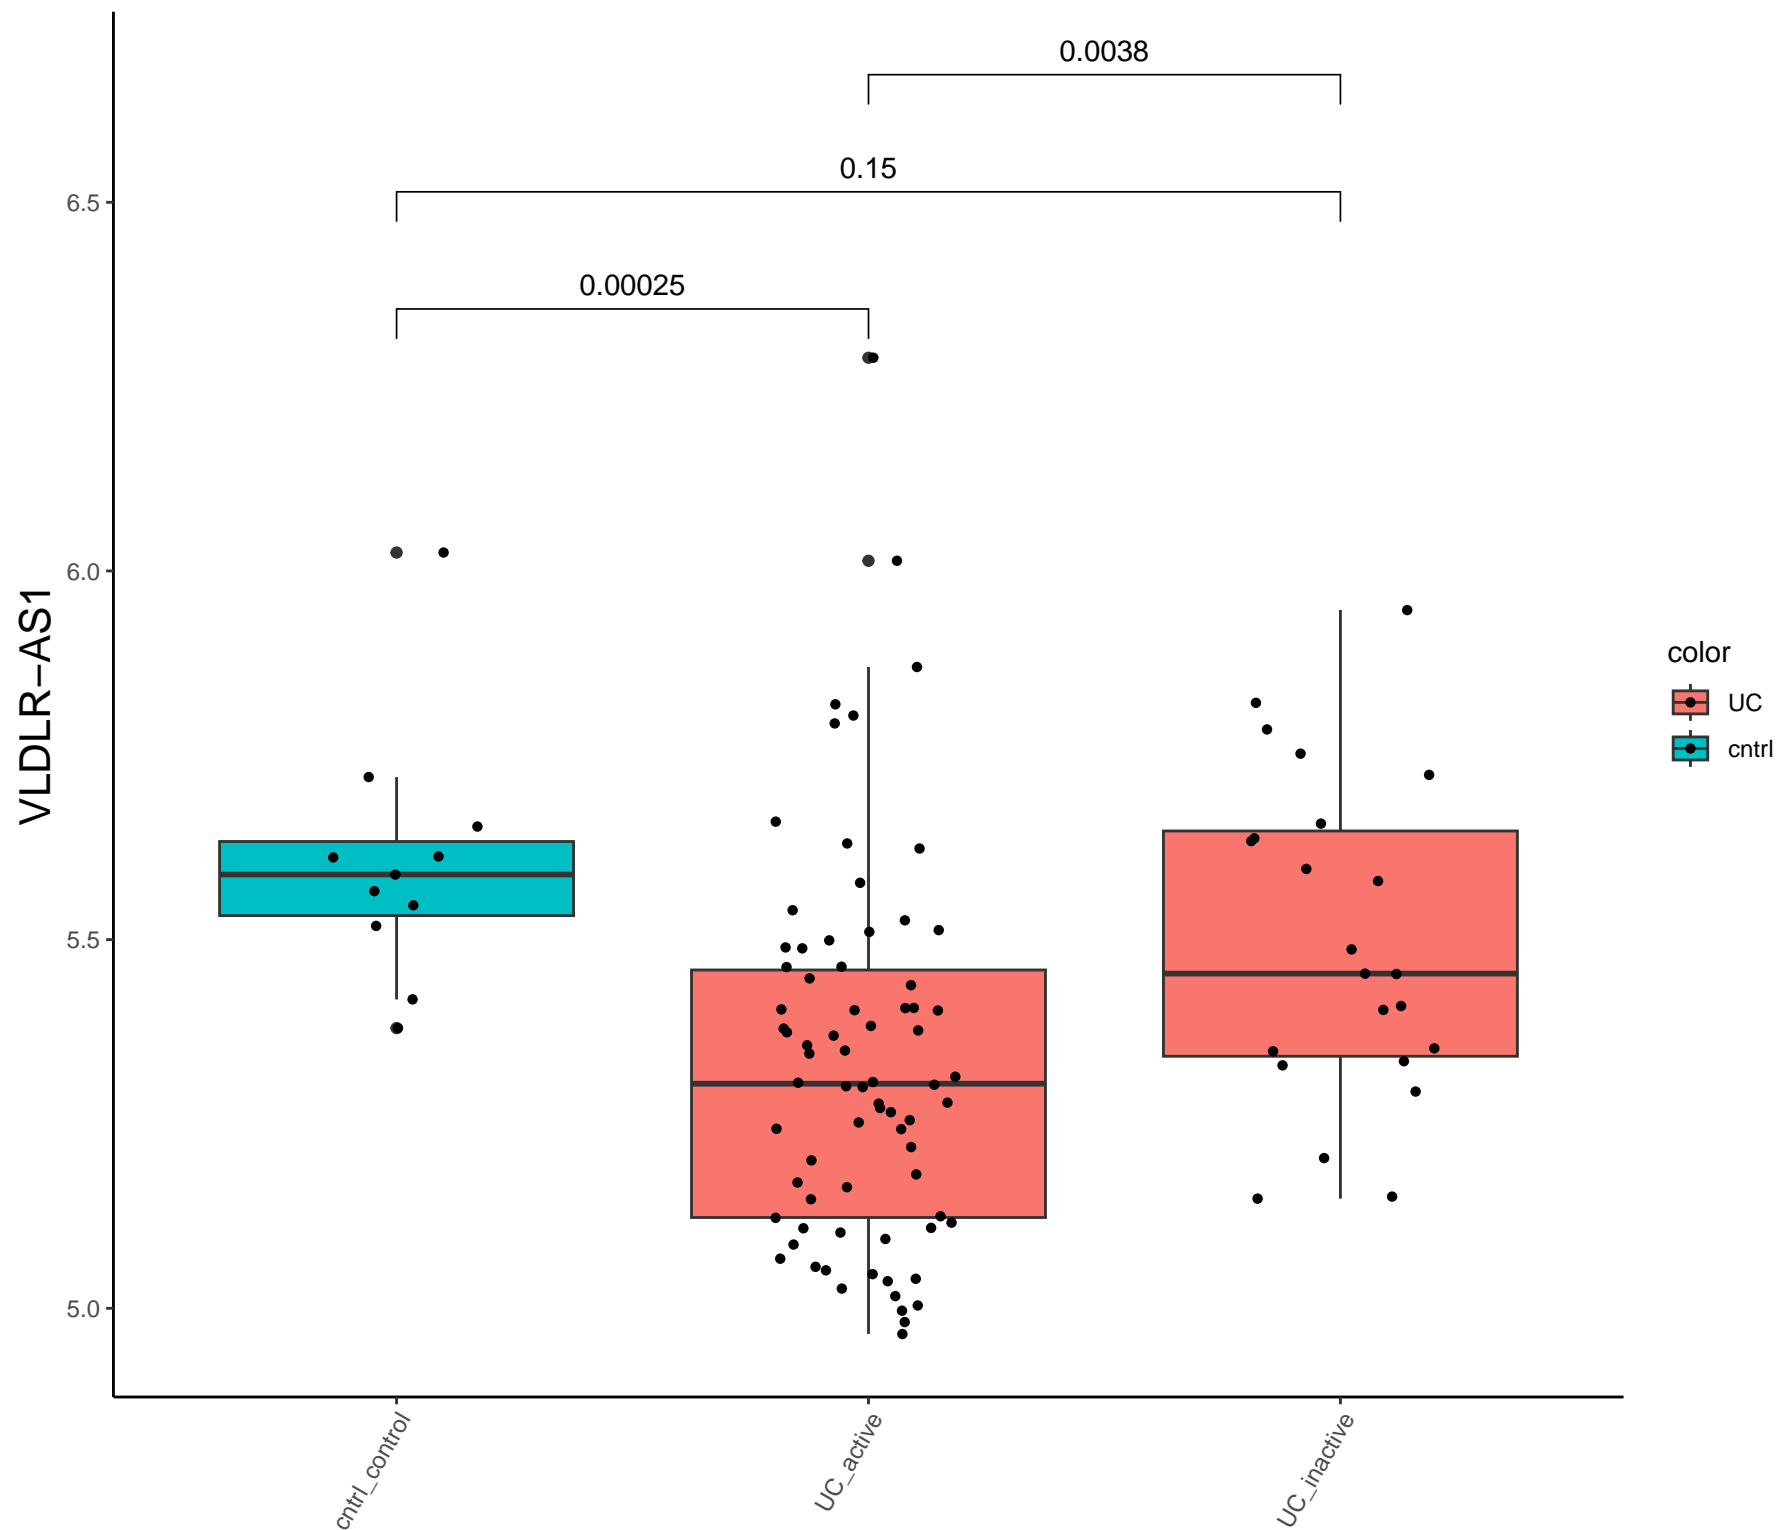

GSE87466

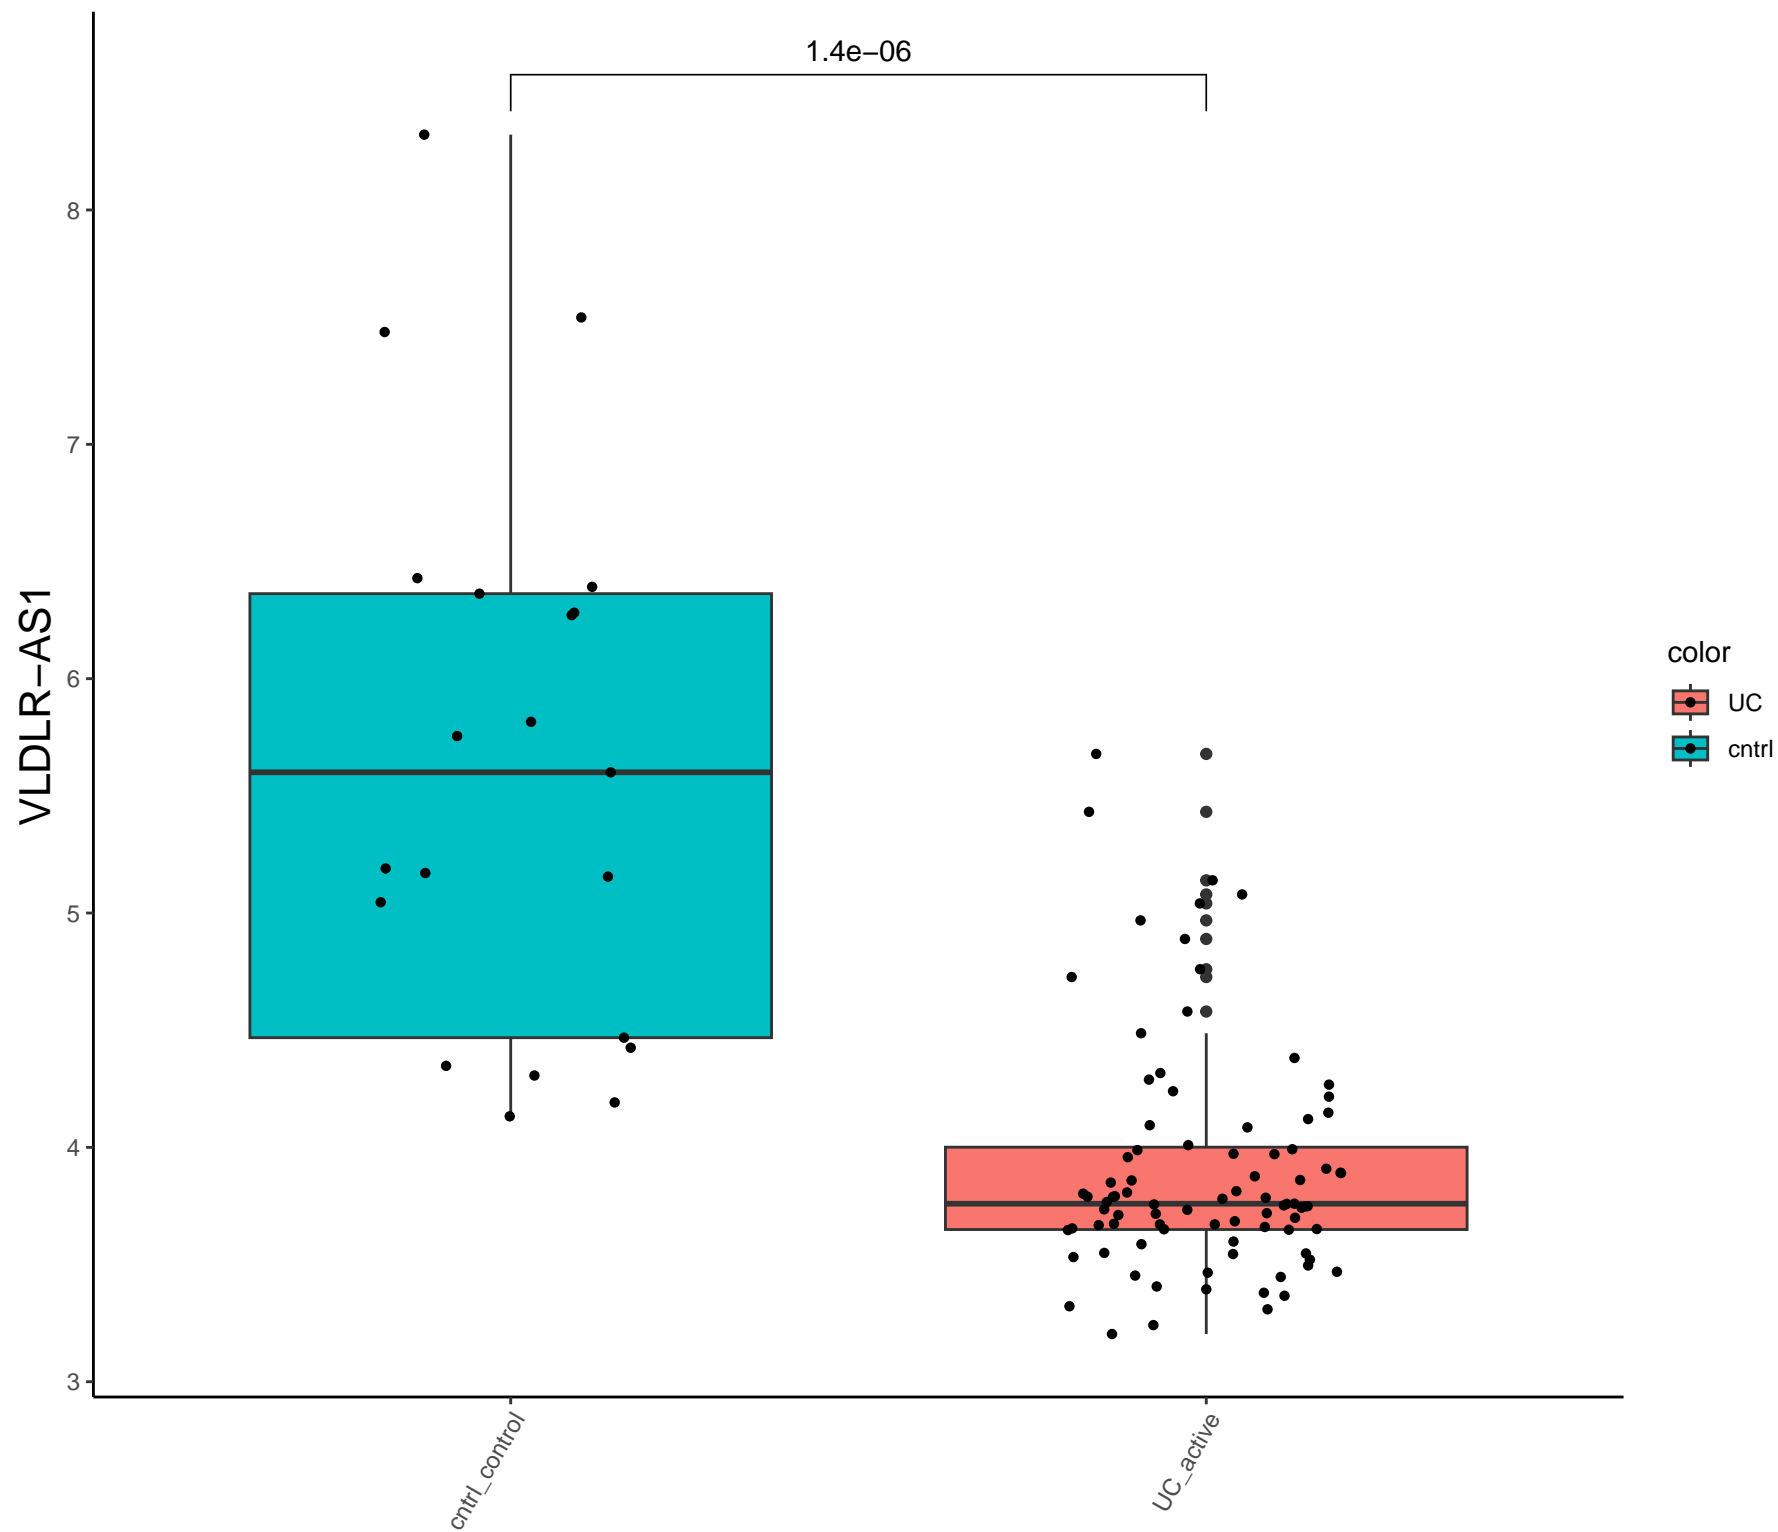

Supplement: s1 [file s1]
