# Supplementary material for: Challenges in Defining a Reference Set of Differentially Expressed lncRNAs in Ulcerative Colitis by Meta-Analysis
Source: MDPI journal article supplement (doi:10.3390/cimb46040198), 2024-04-05

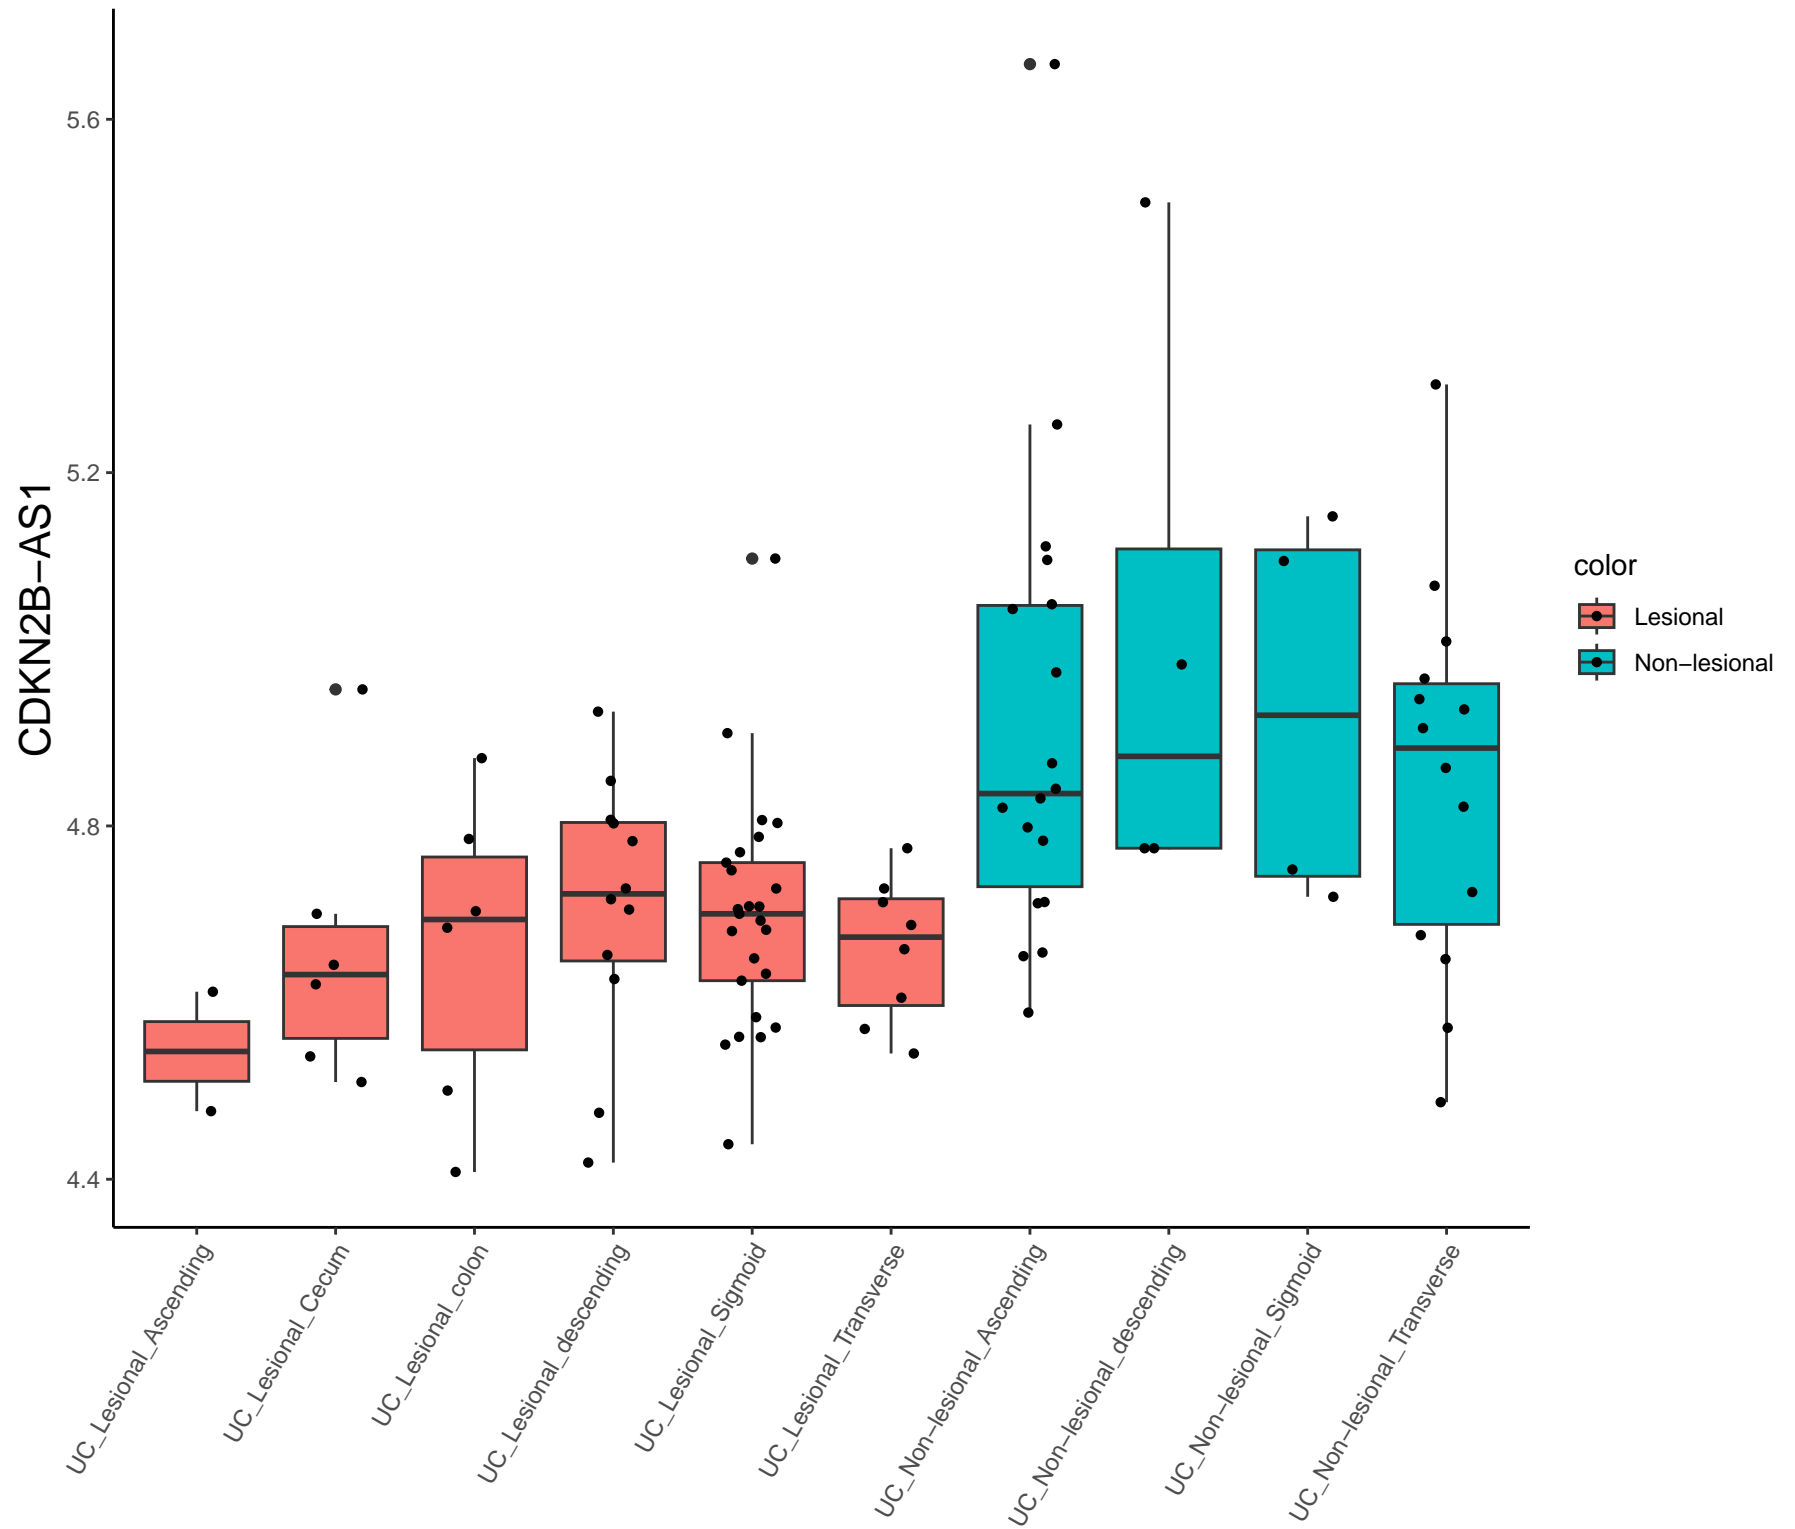

GSE128682

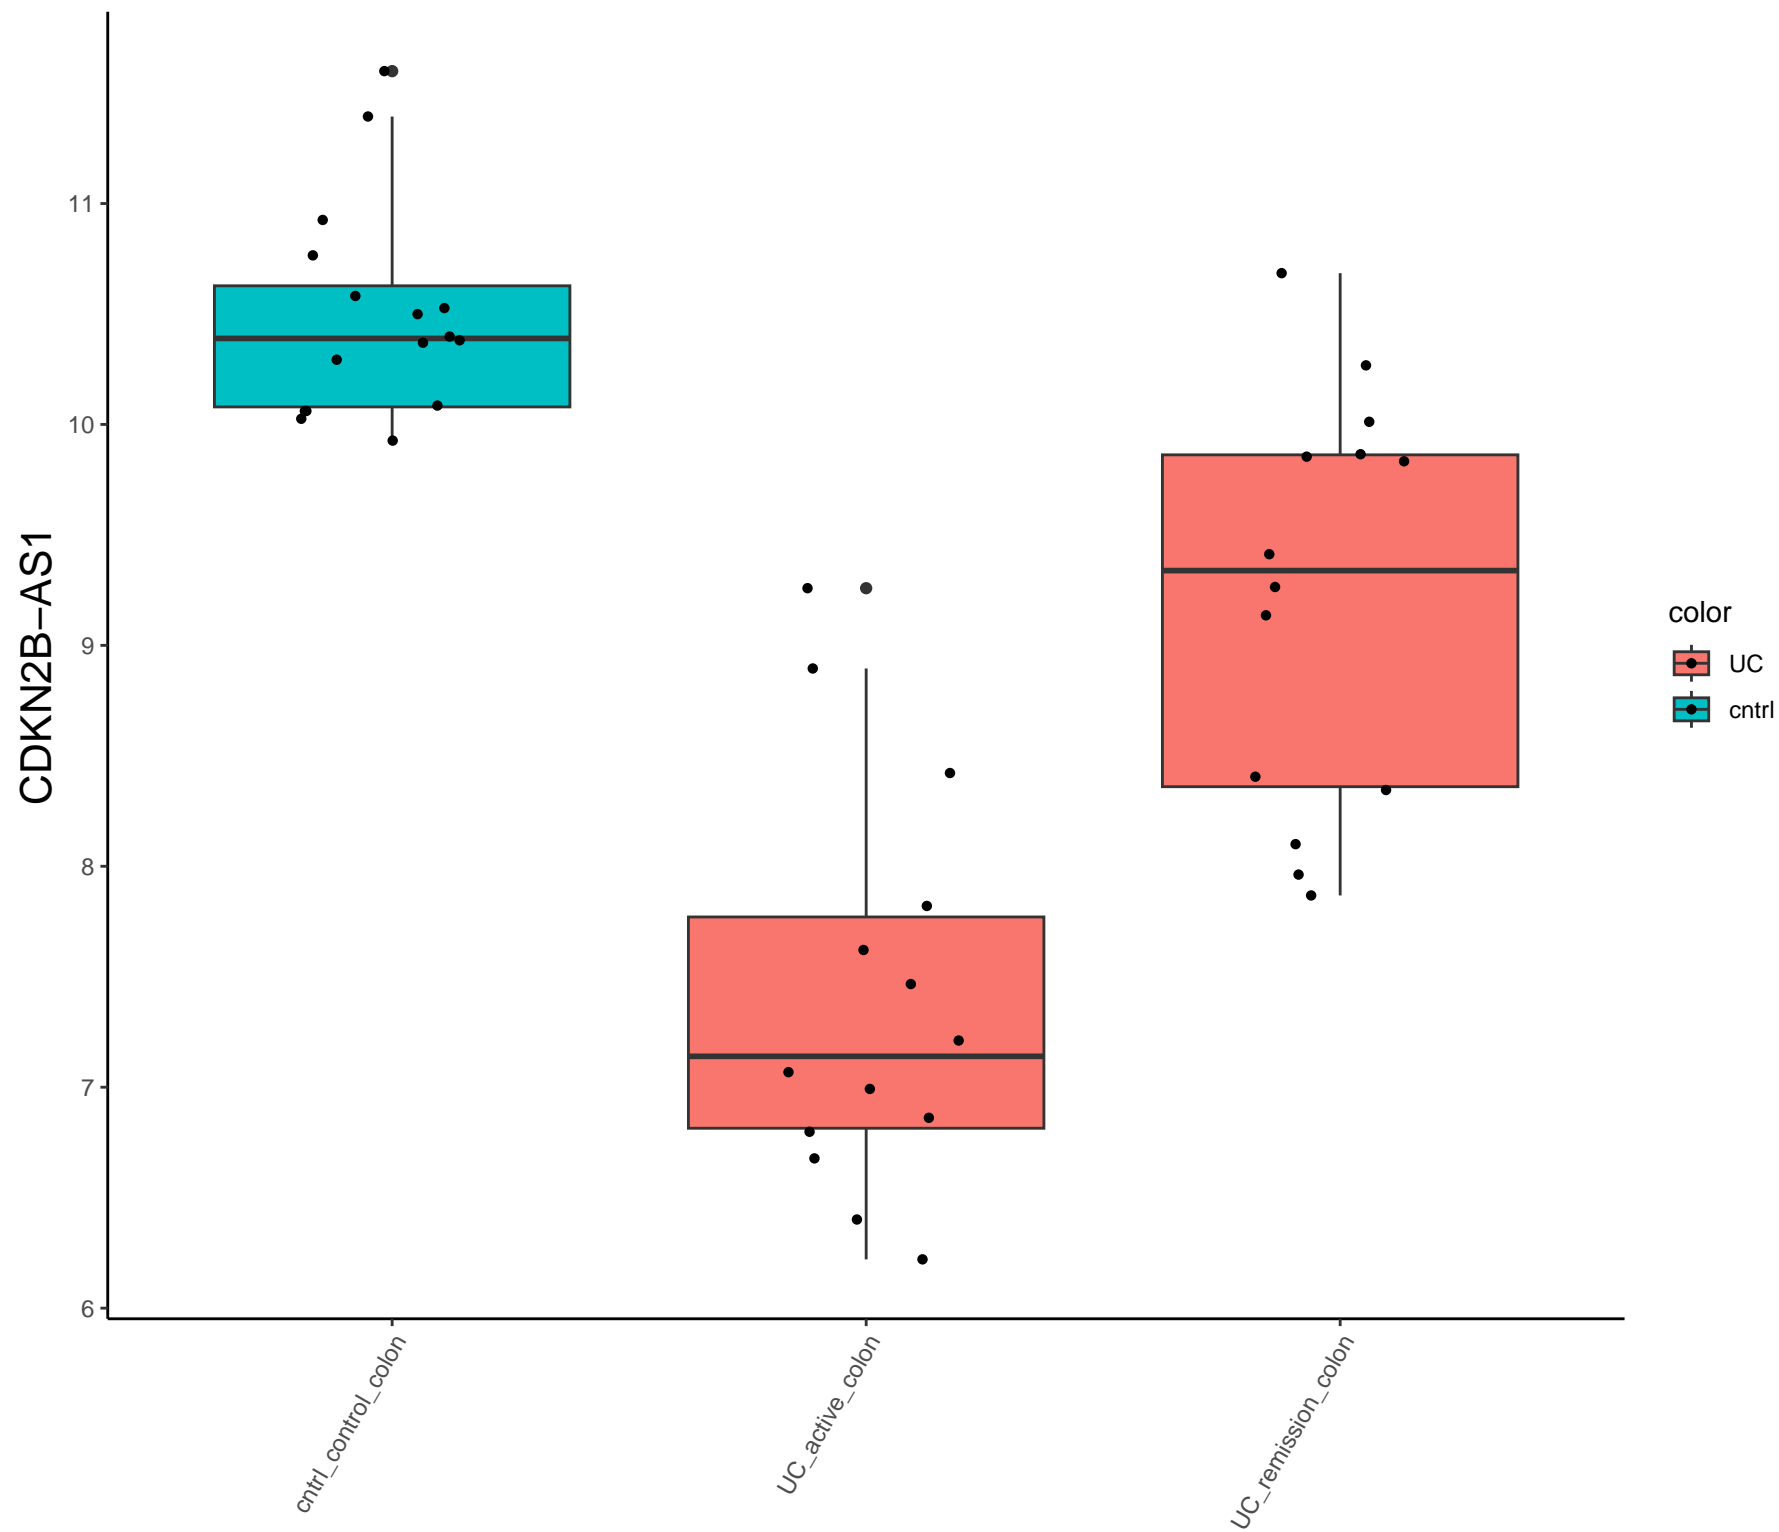

GSE38713

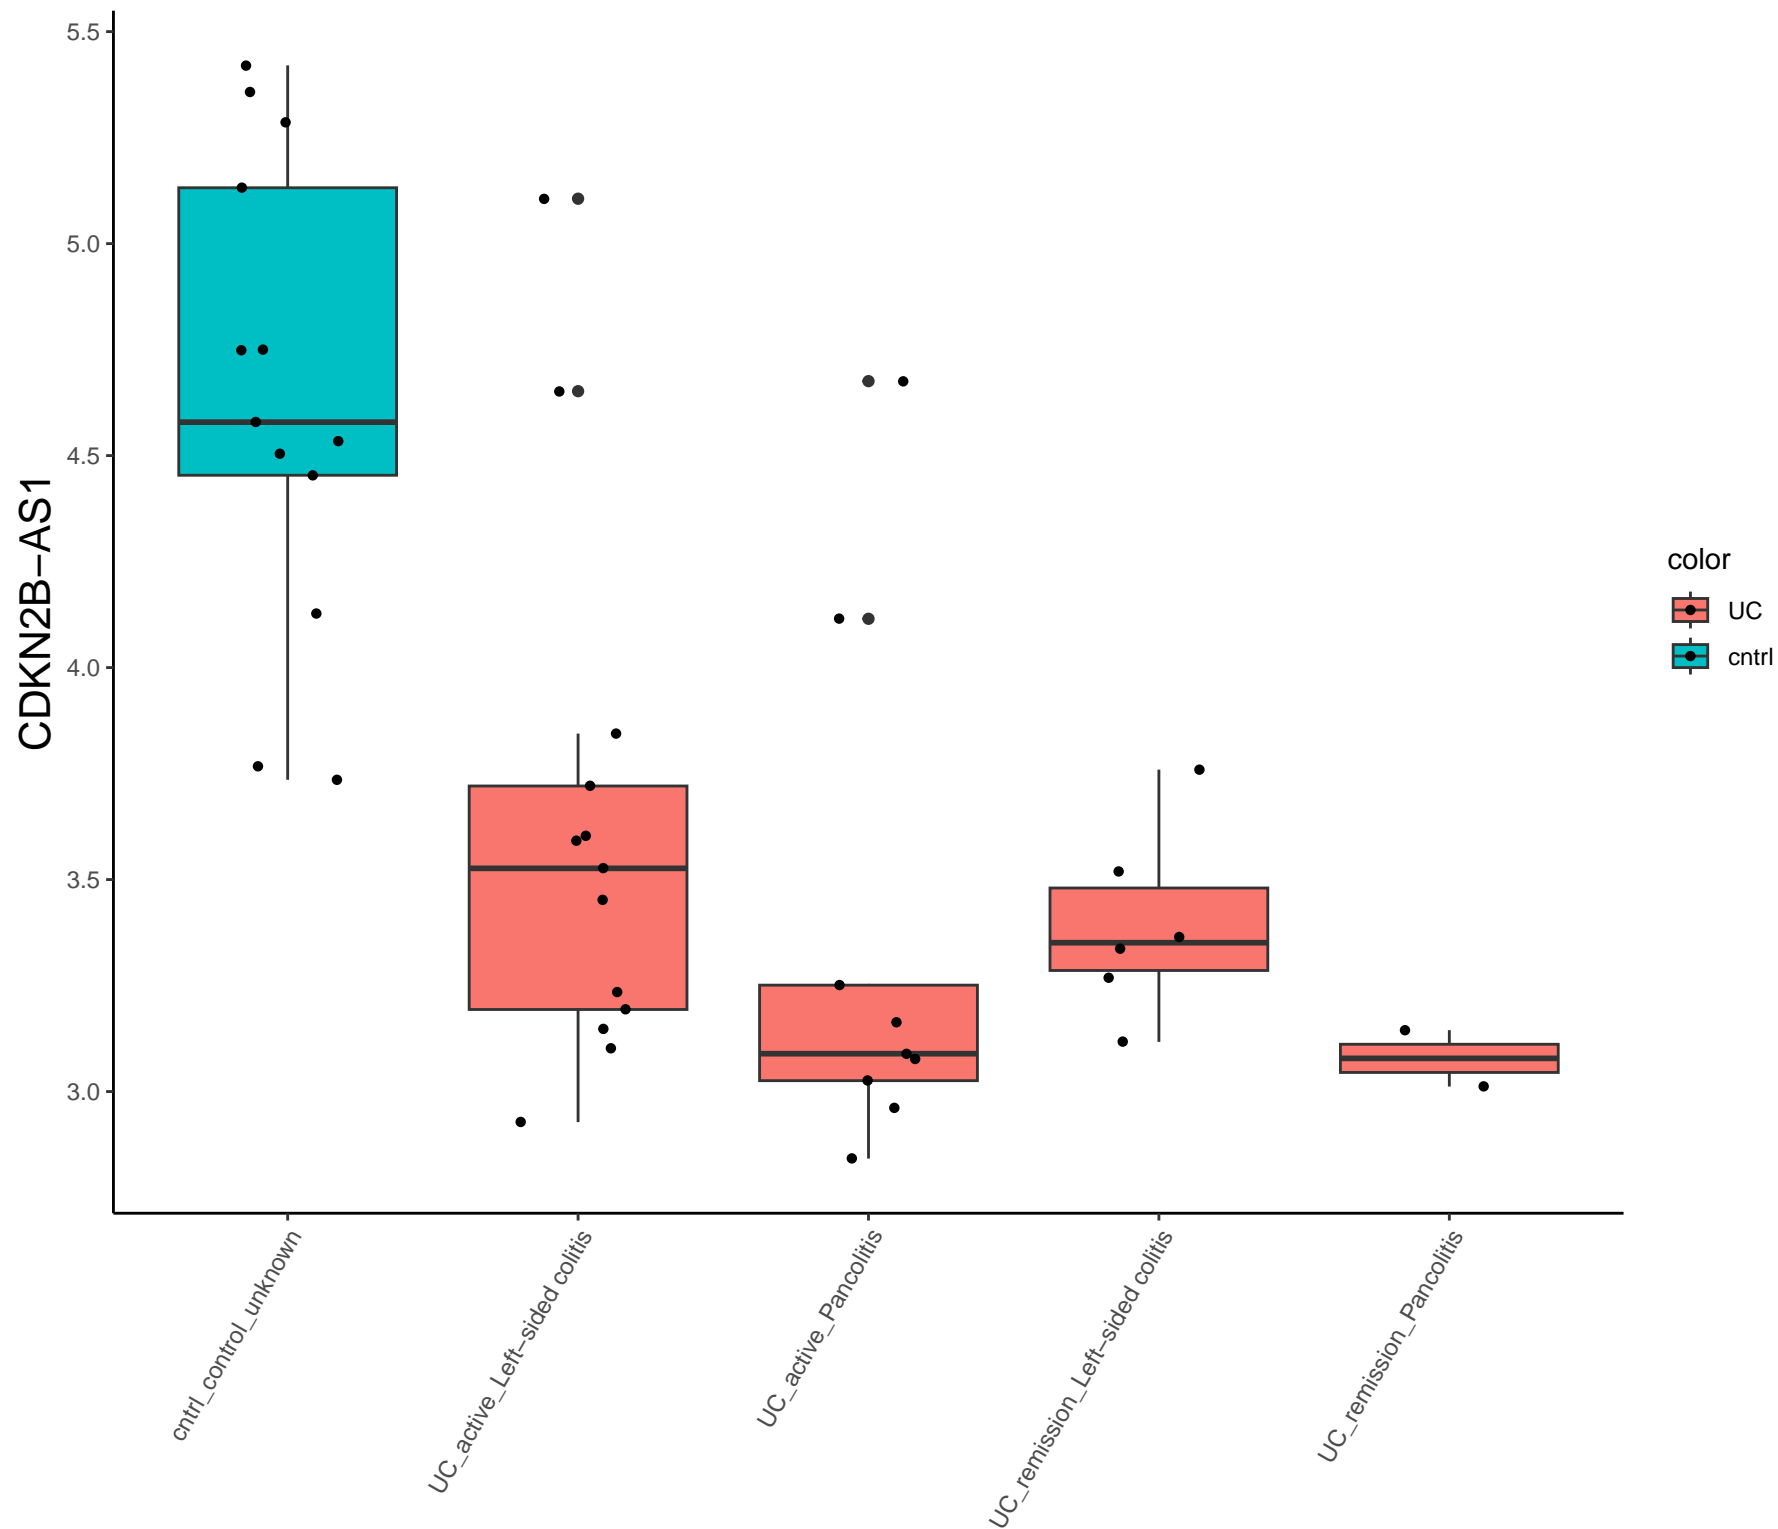

GSE48634

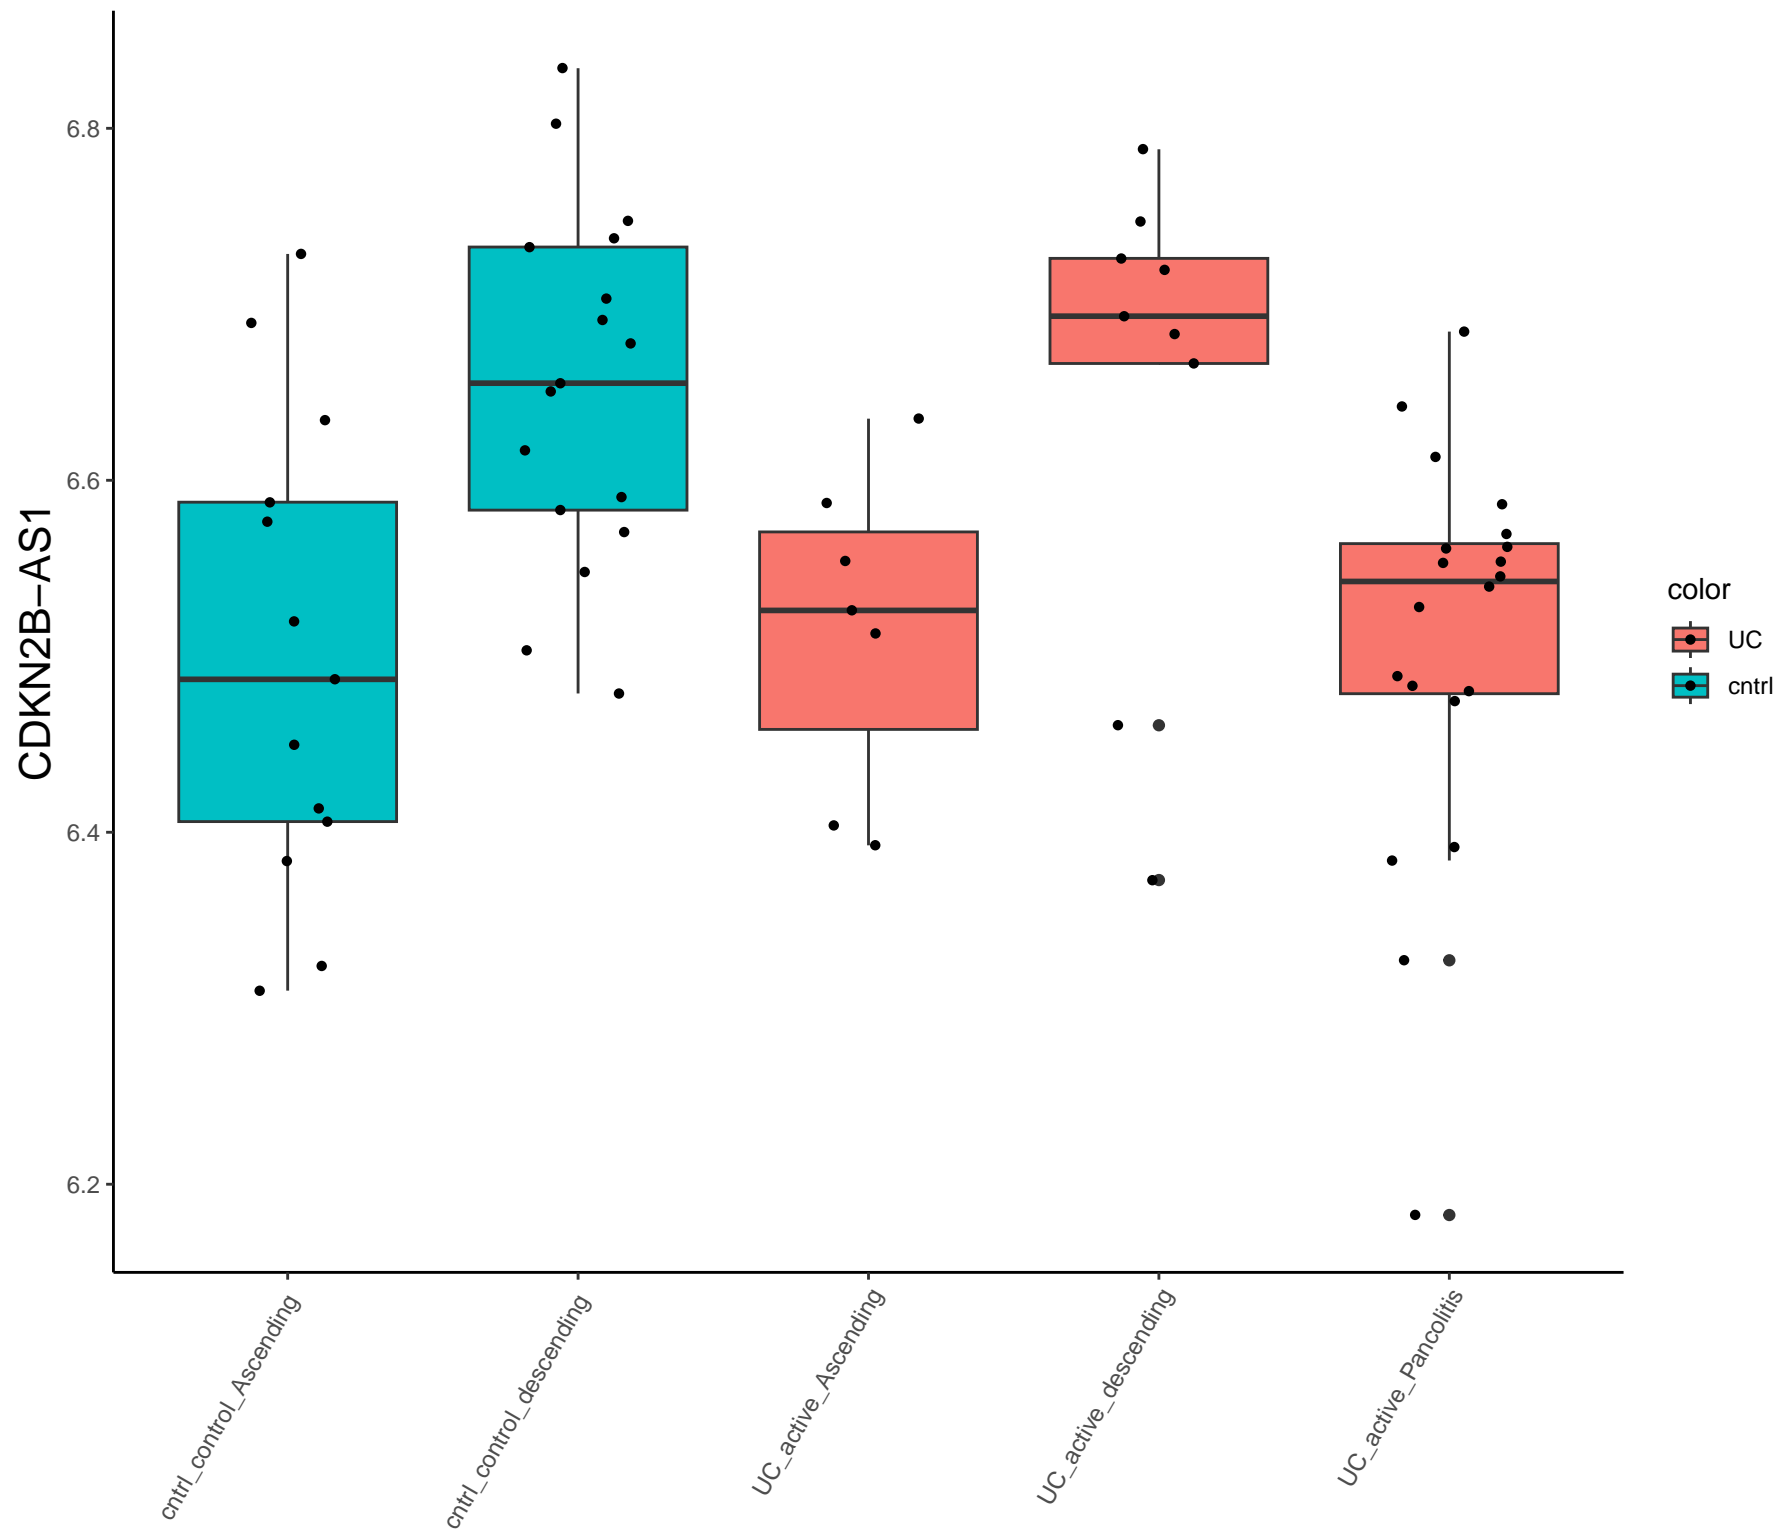

GSE9452

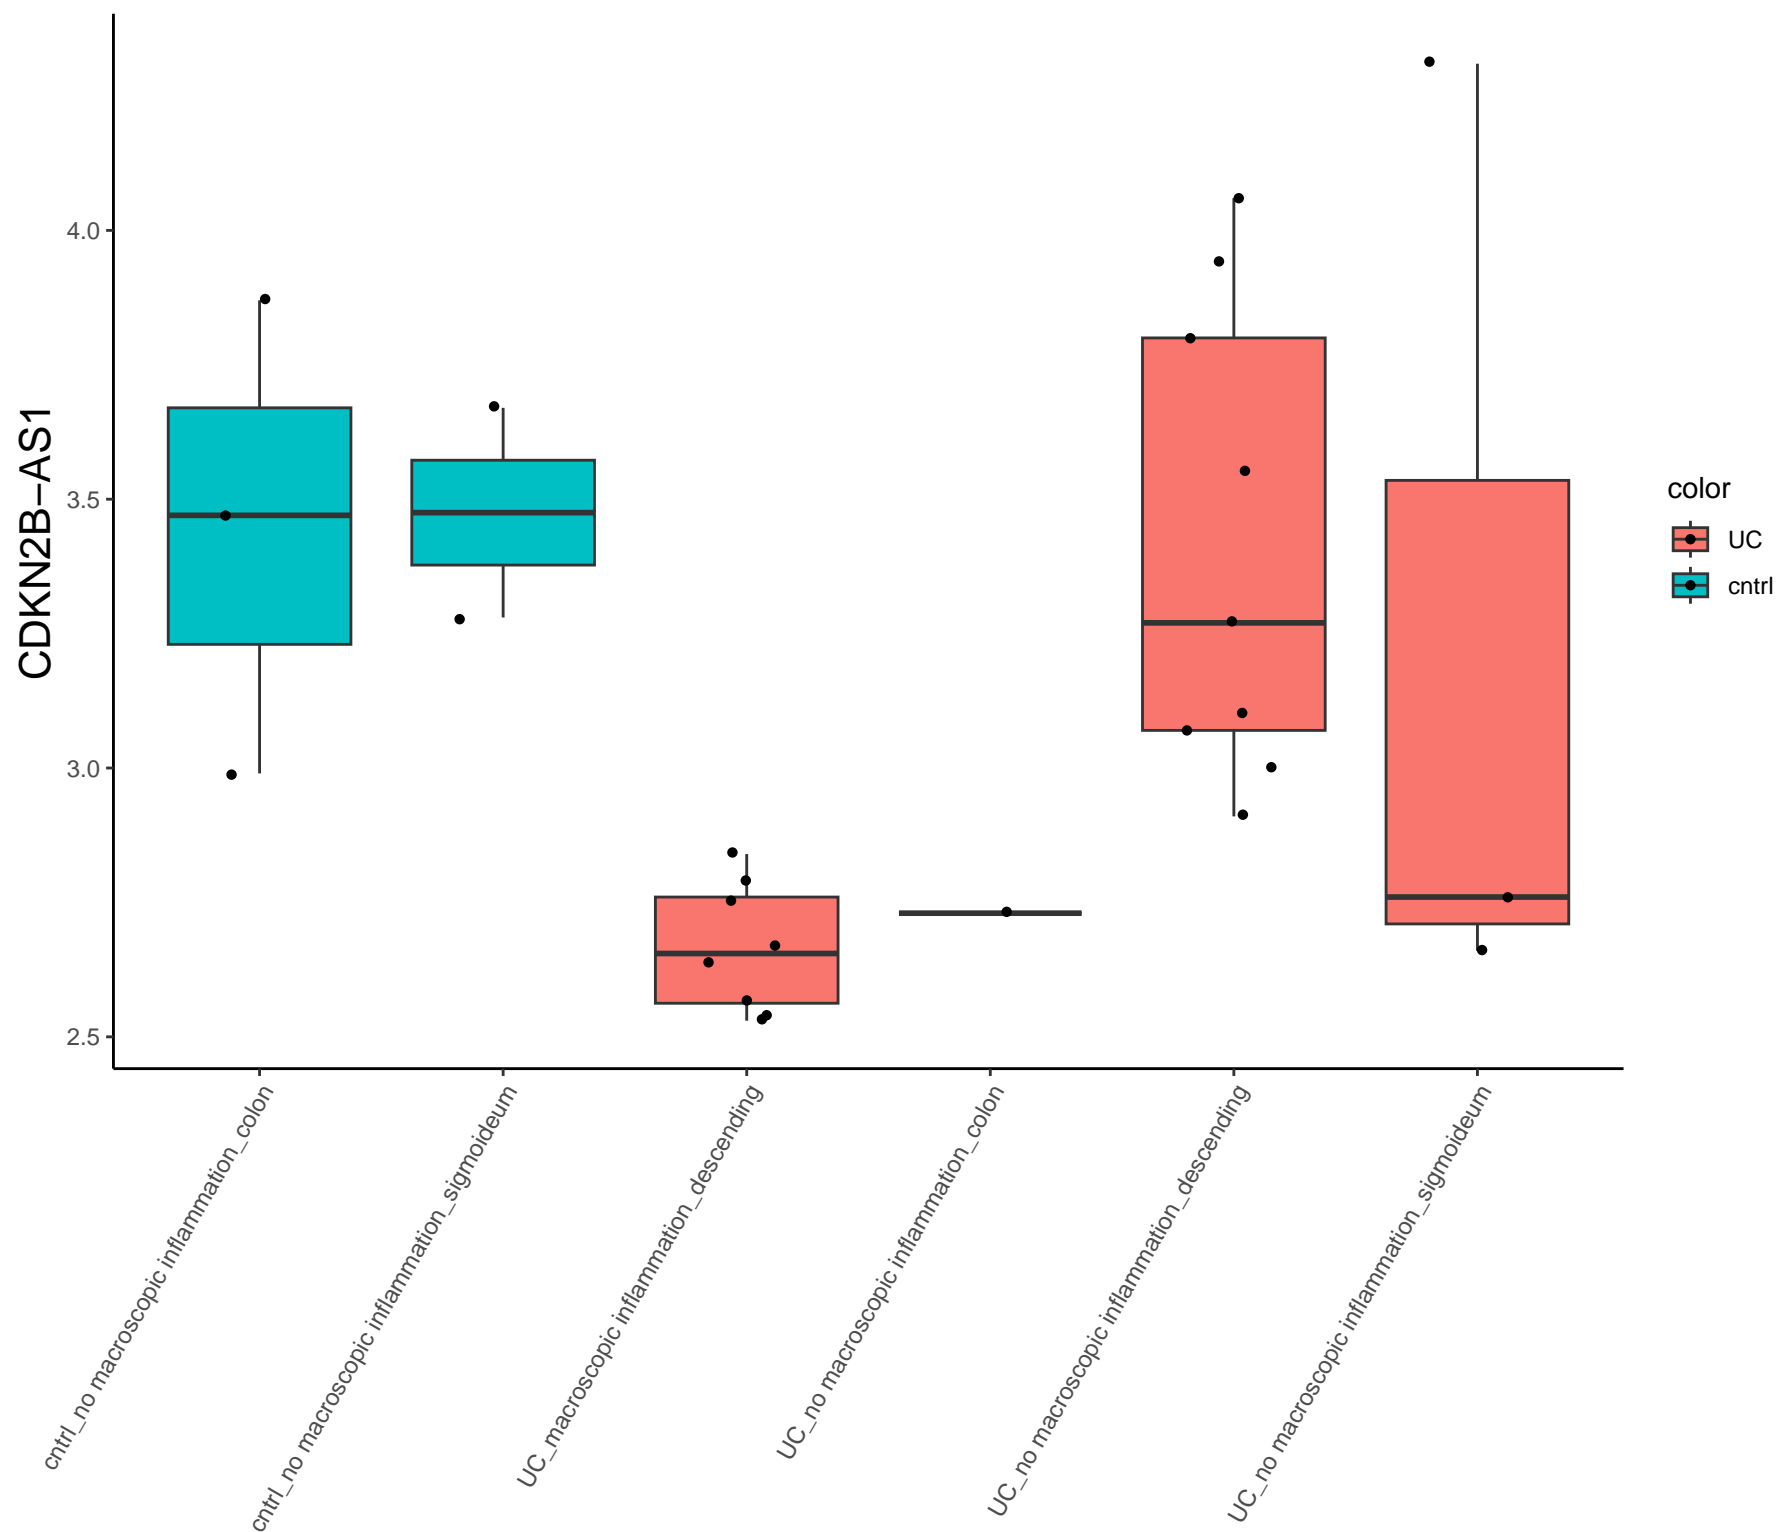

GSE107499

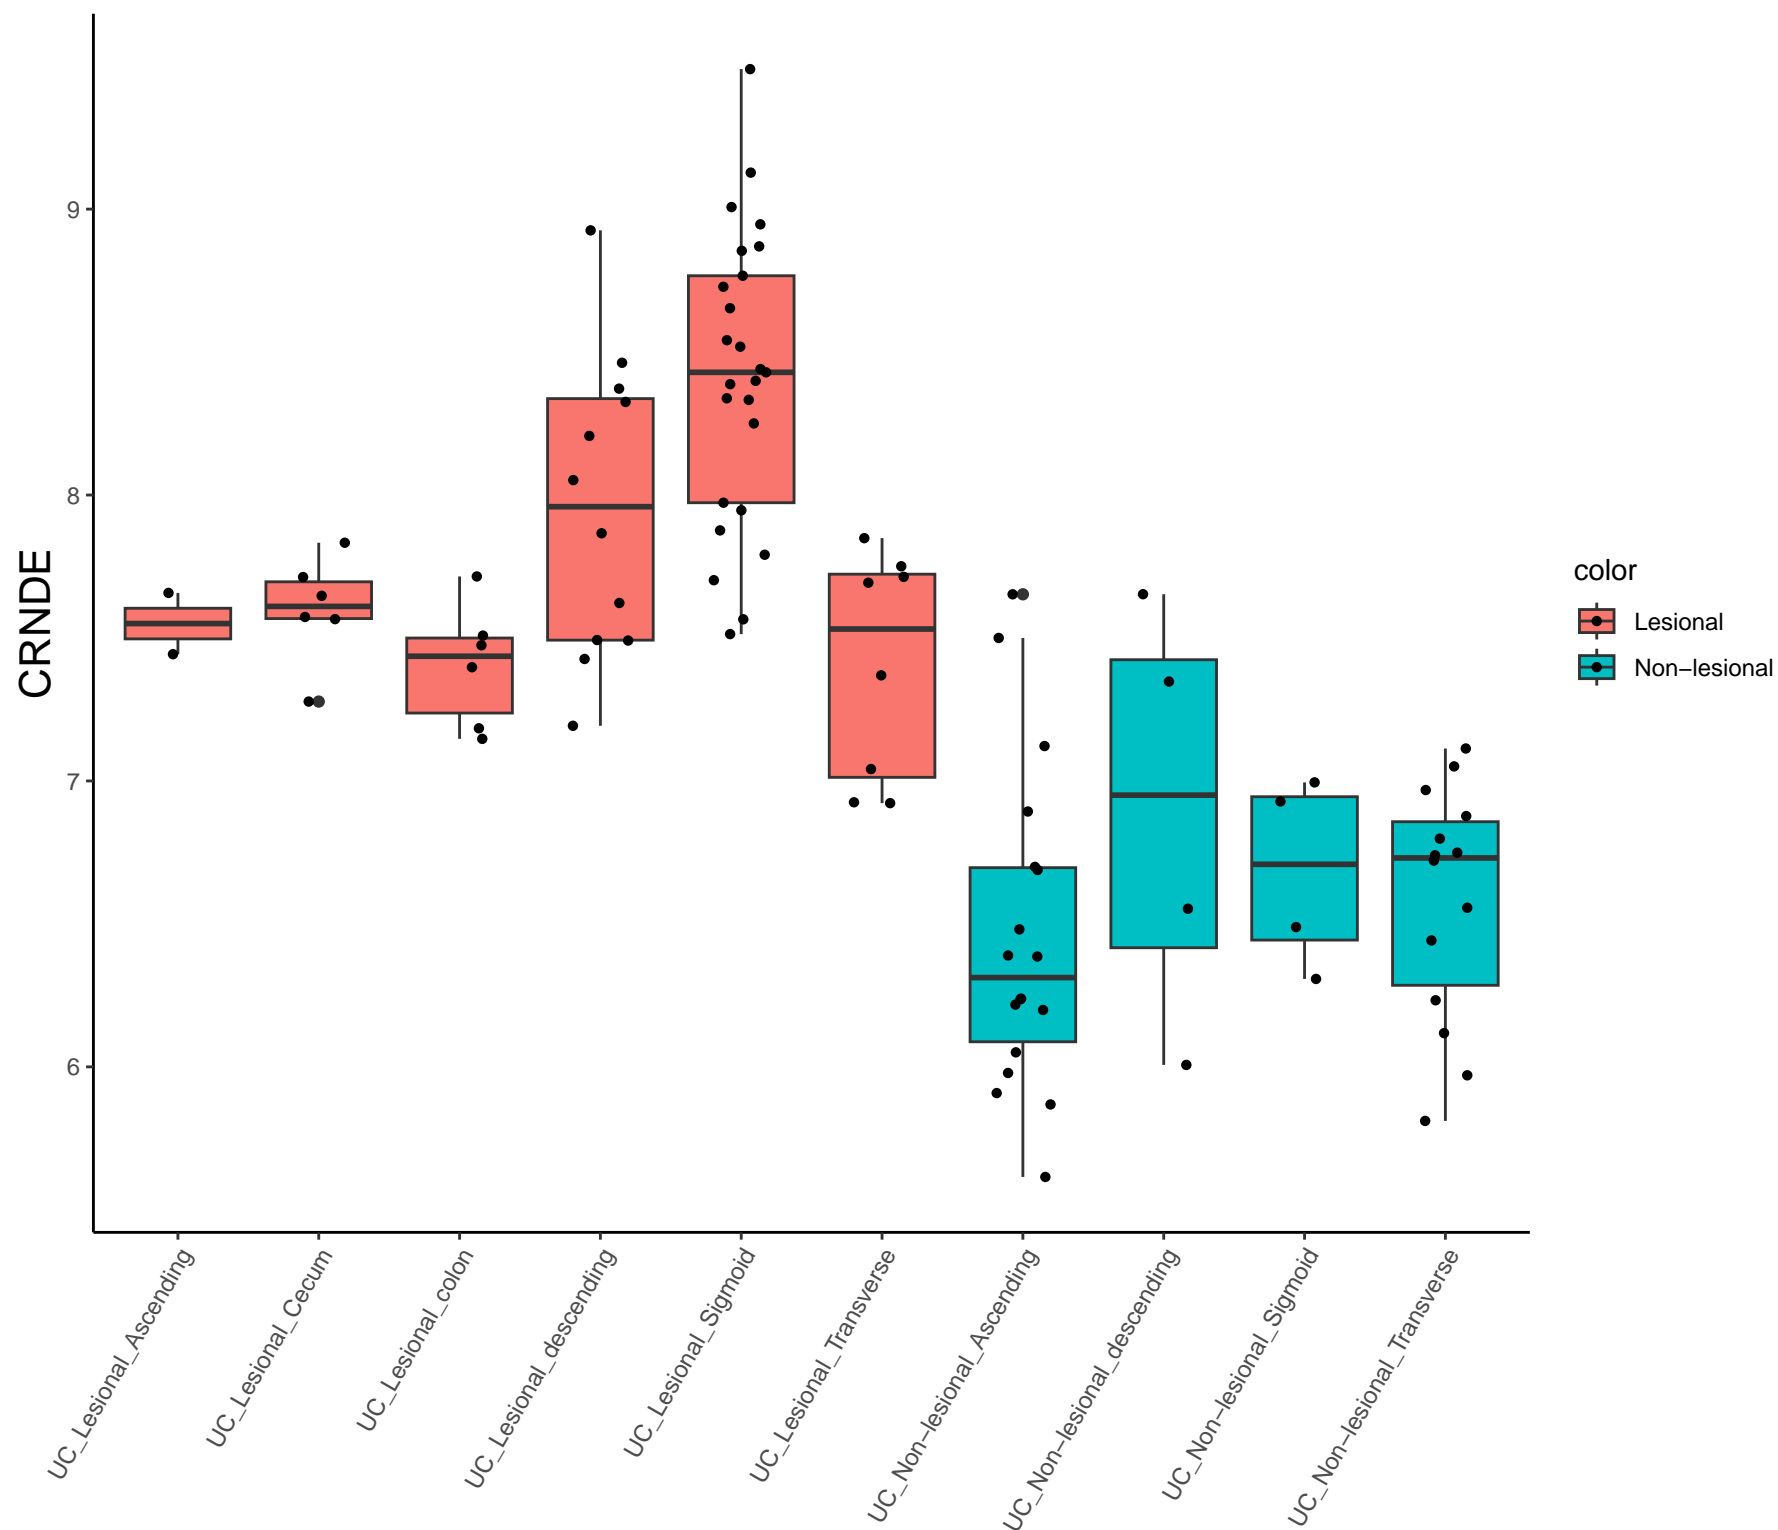

GSE128682

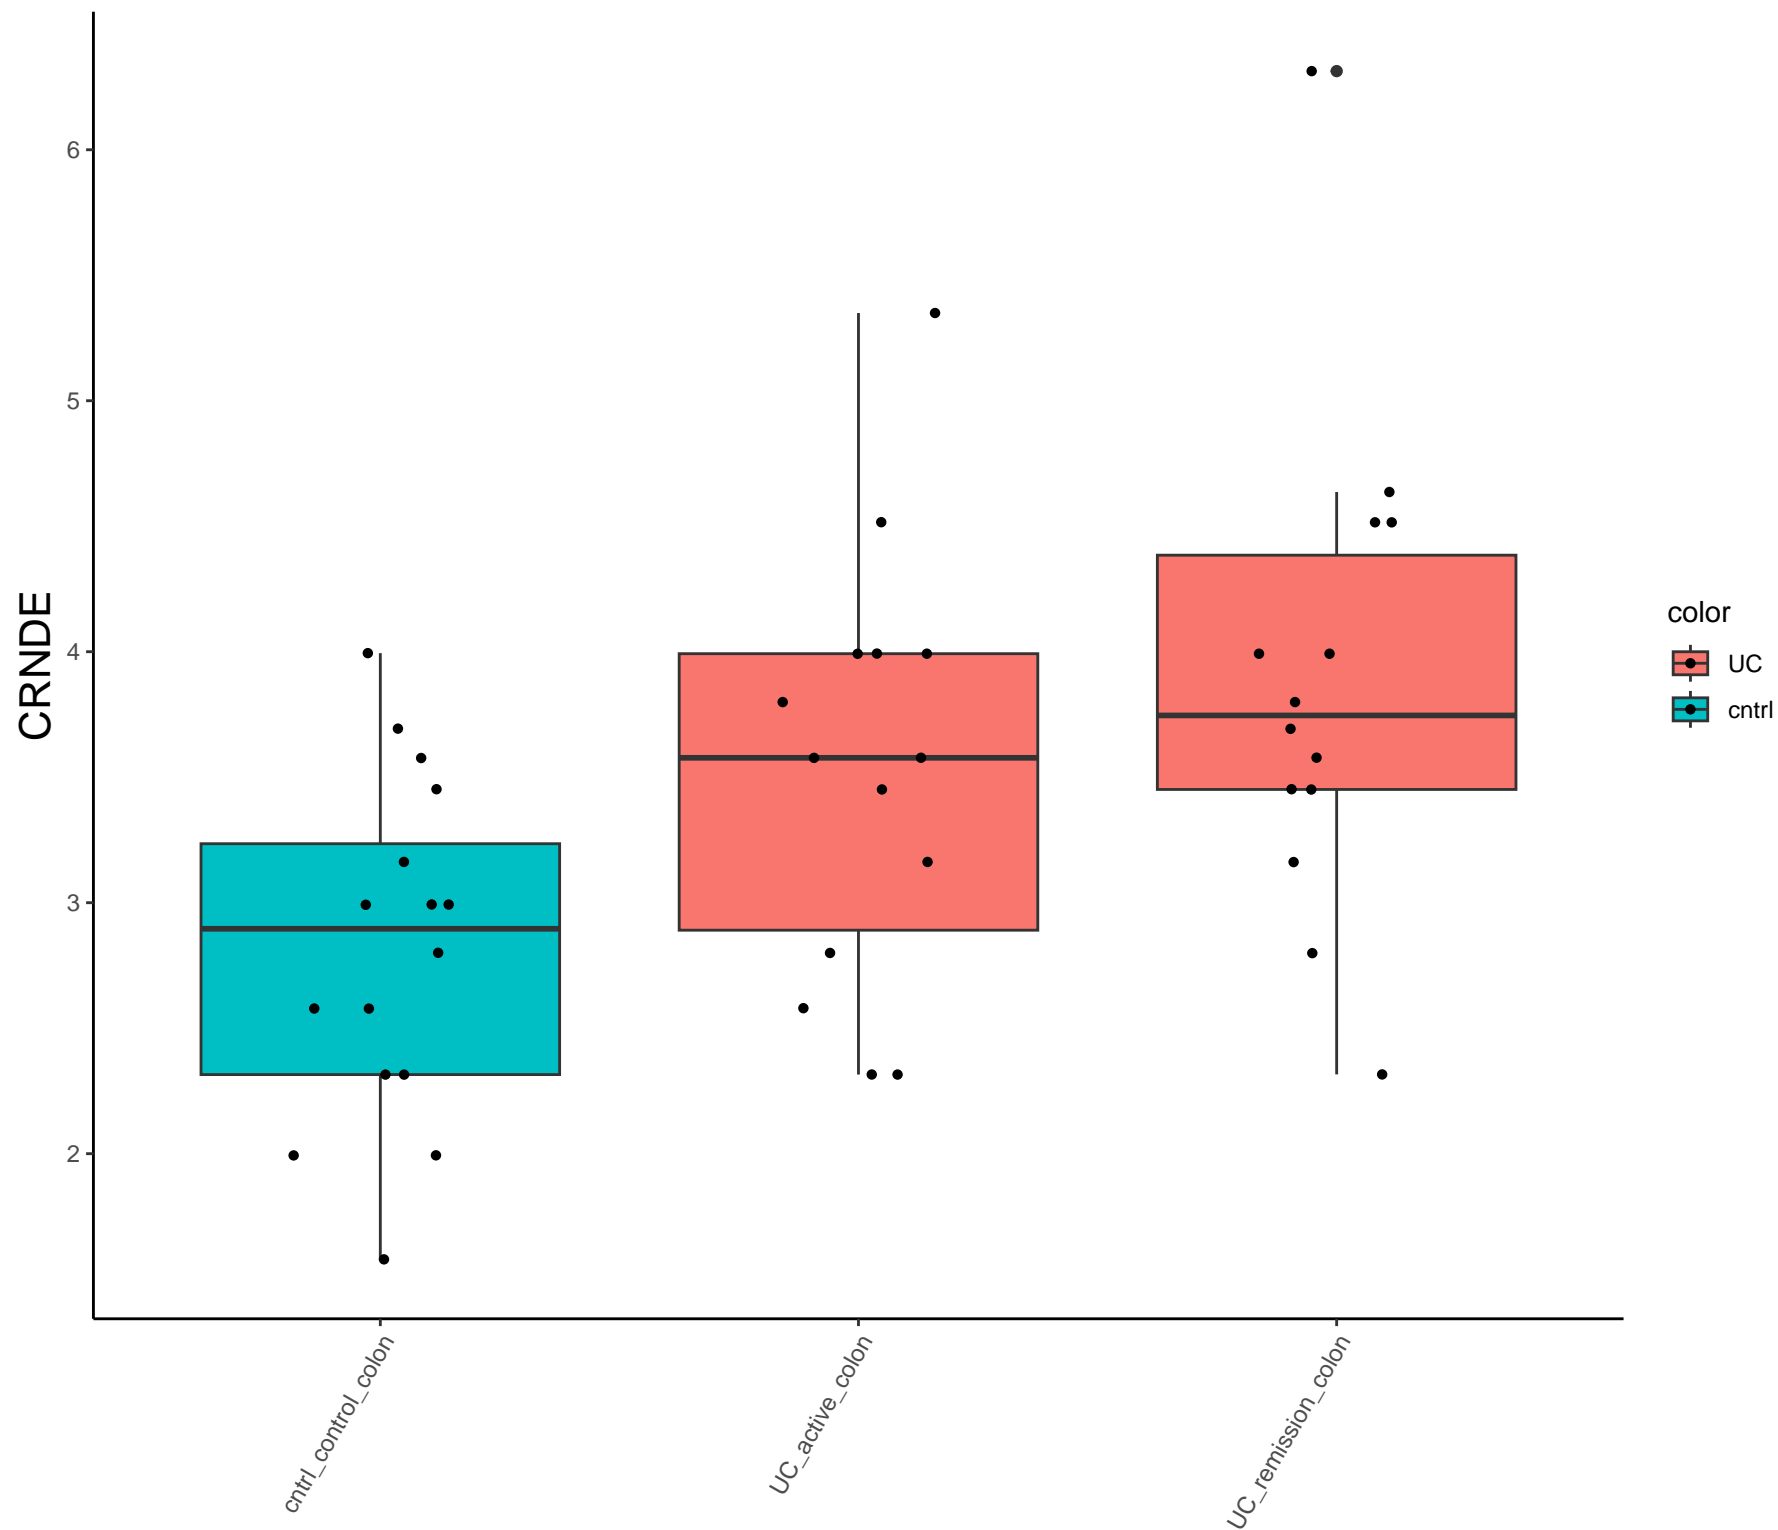

GSE38713

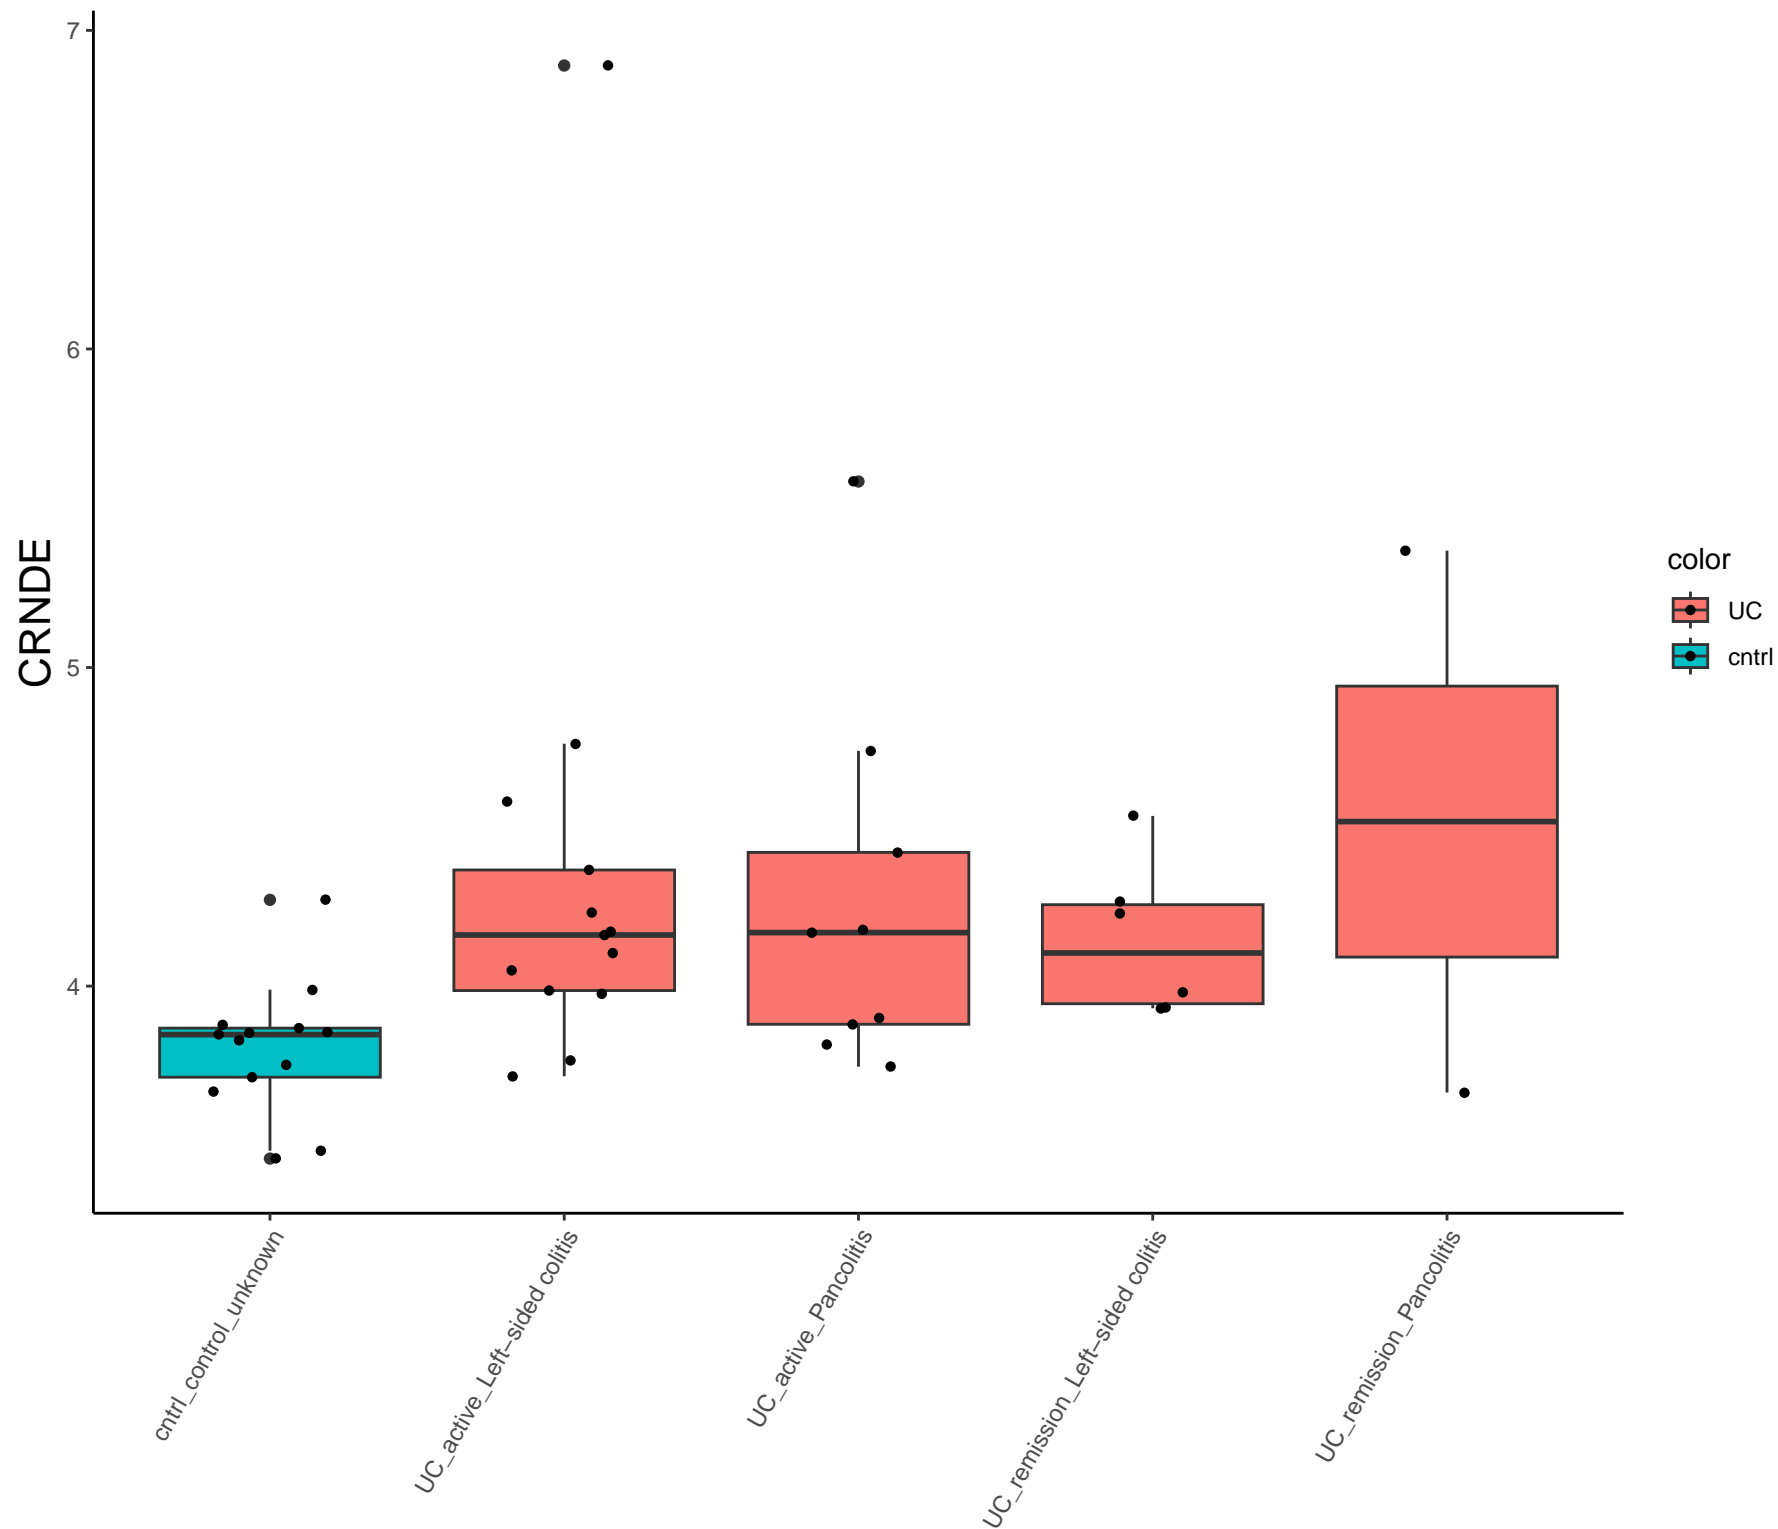



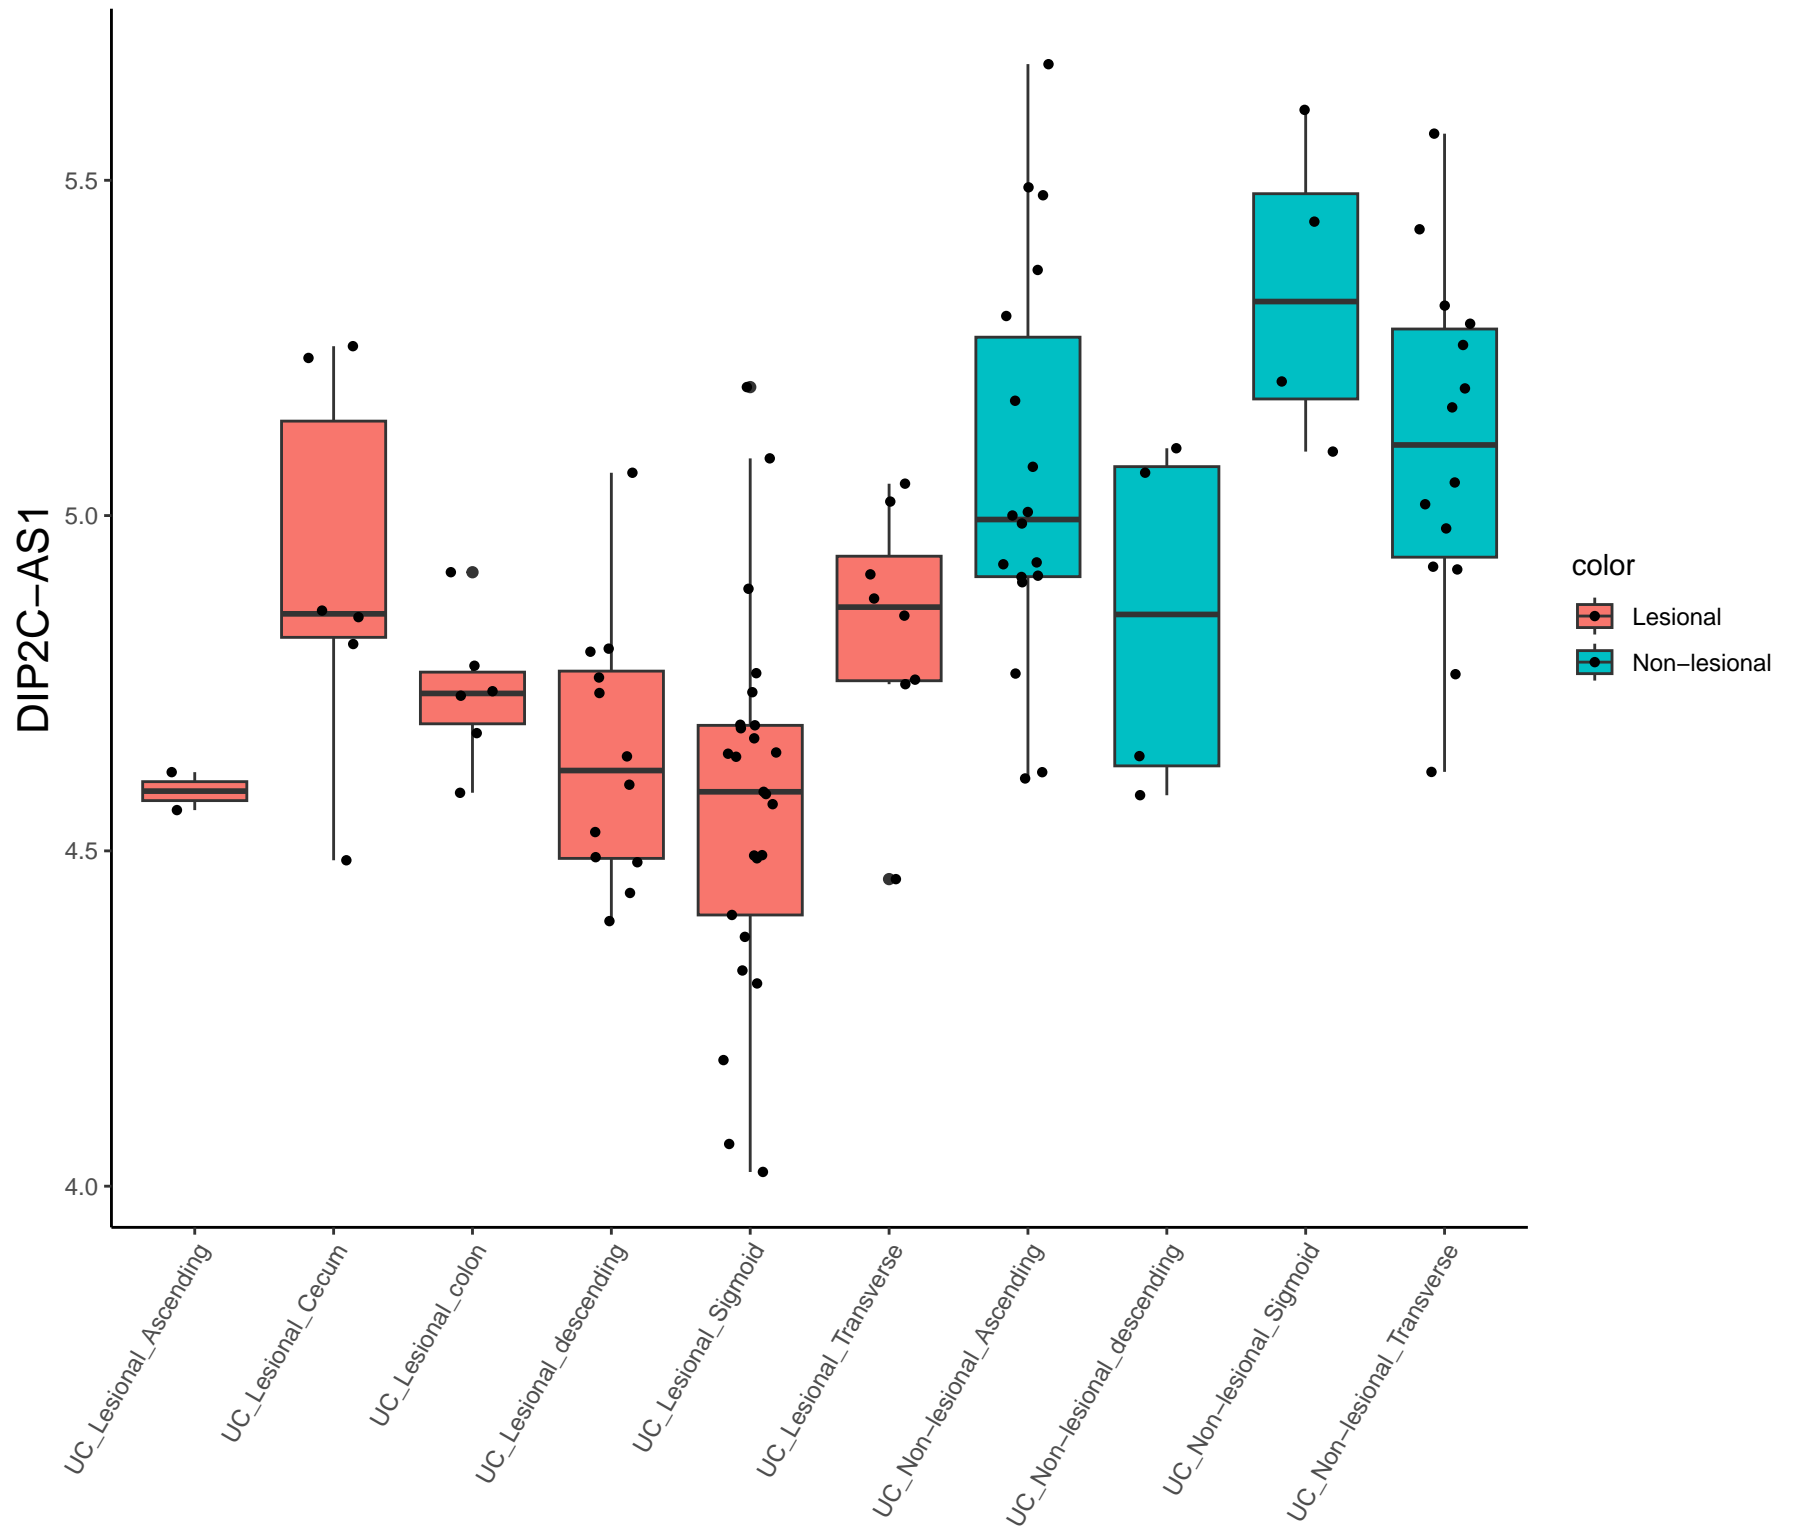

GSE128682

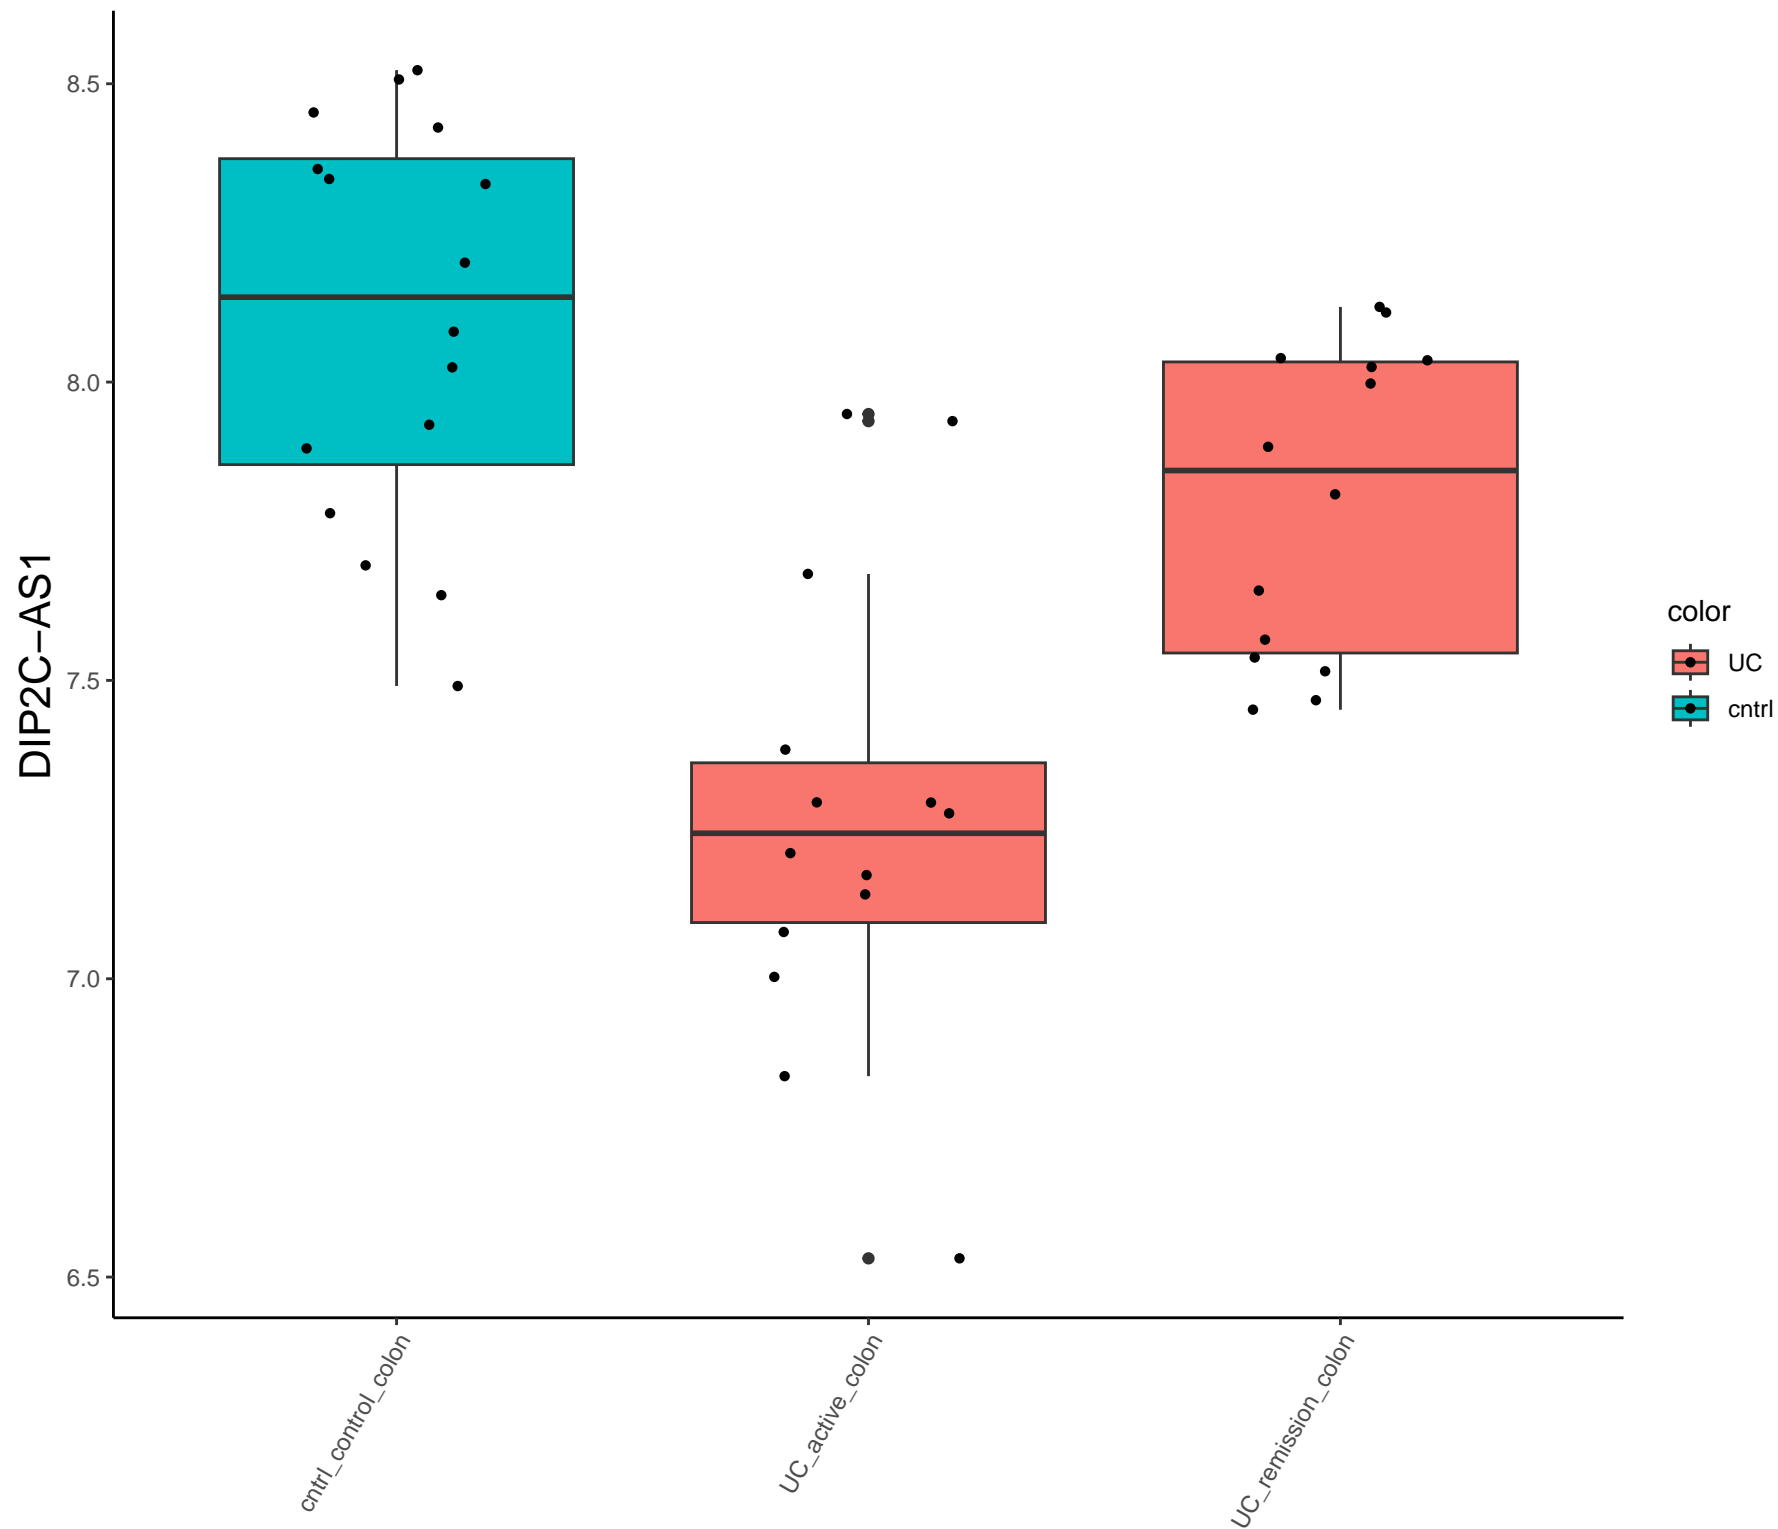

GSE38713

DIP2C-AS1

color  
UC  
cntrl

cntrl\_control\_unknown

UC\_active\_Left-sided colitis

UC\_active\_Pancolitis

UC\_remission\_Left-sided colitis

UC\_remission\_Pancolitis

5.5  
5.0  
4.5  
4.0  
3.5

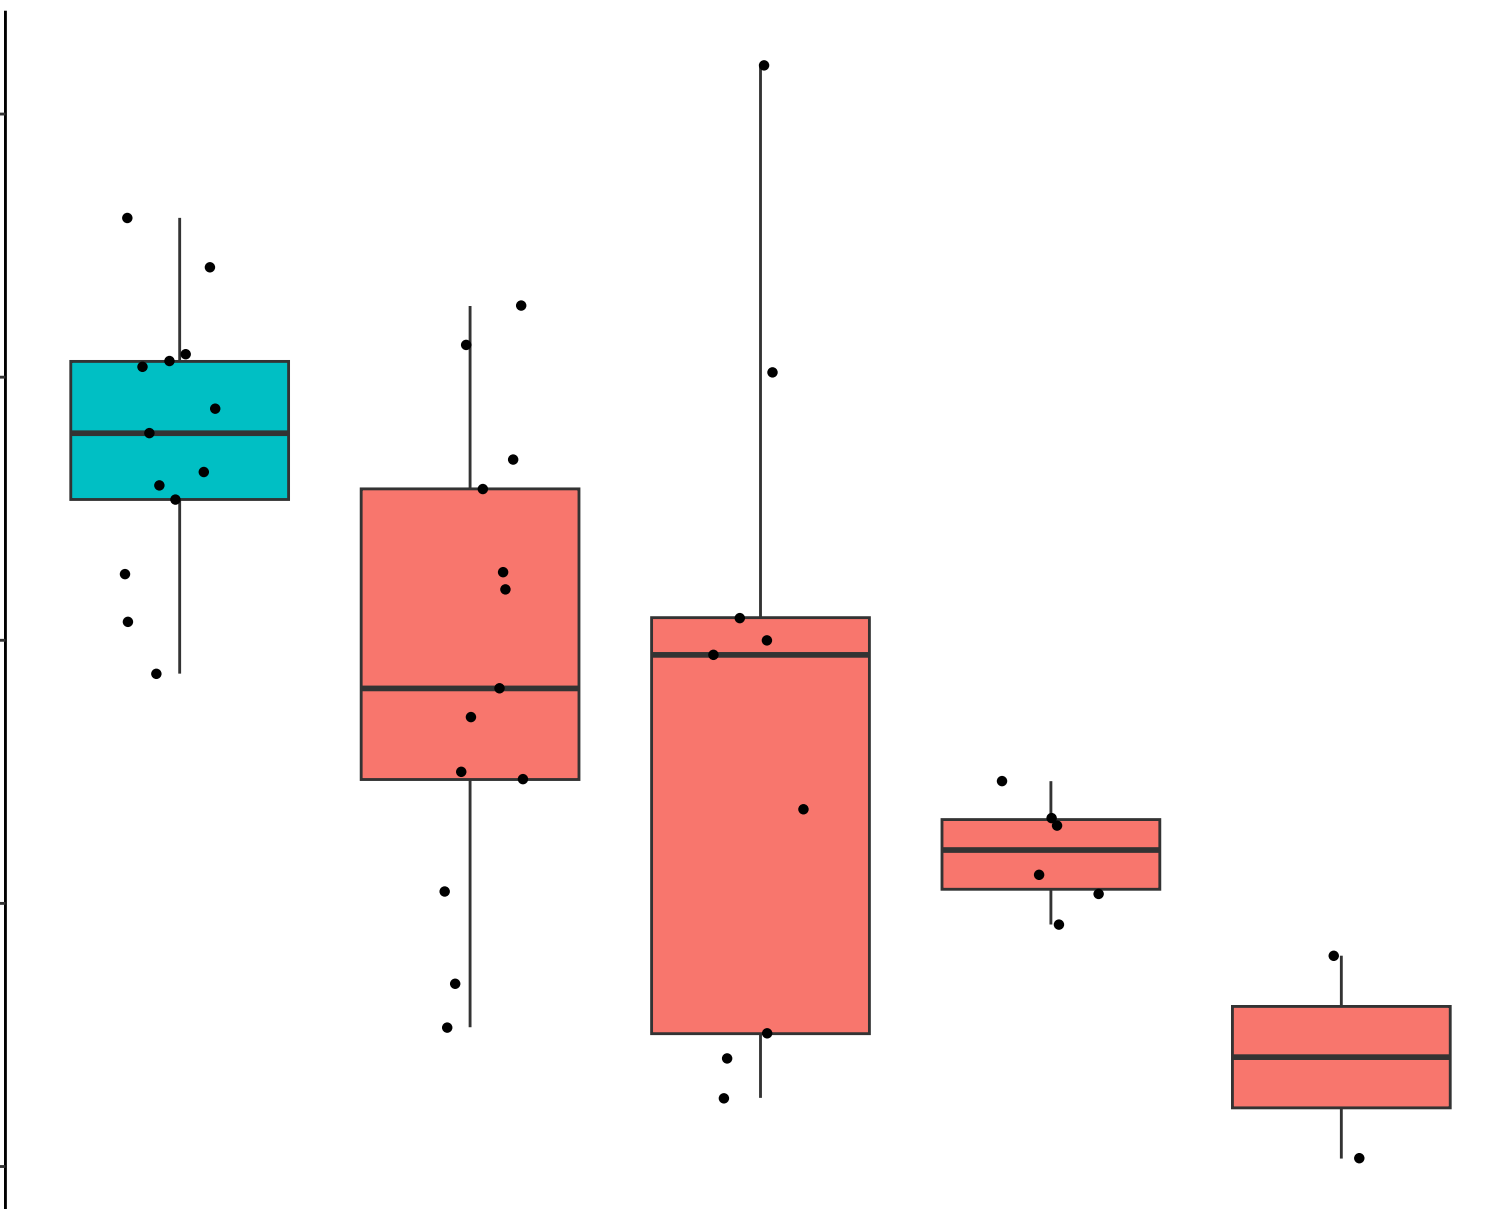

GSE48634

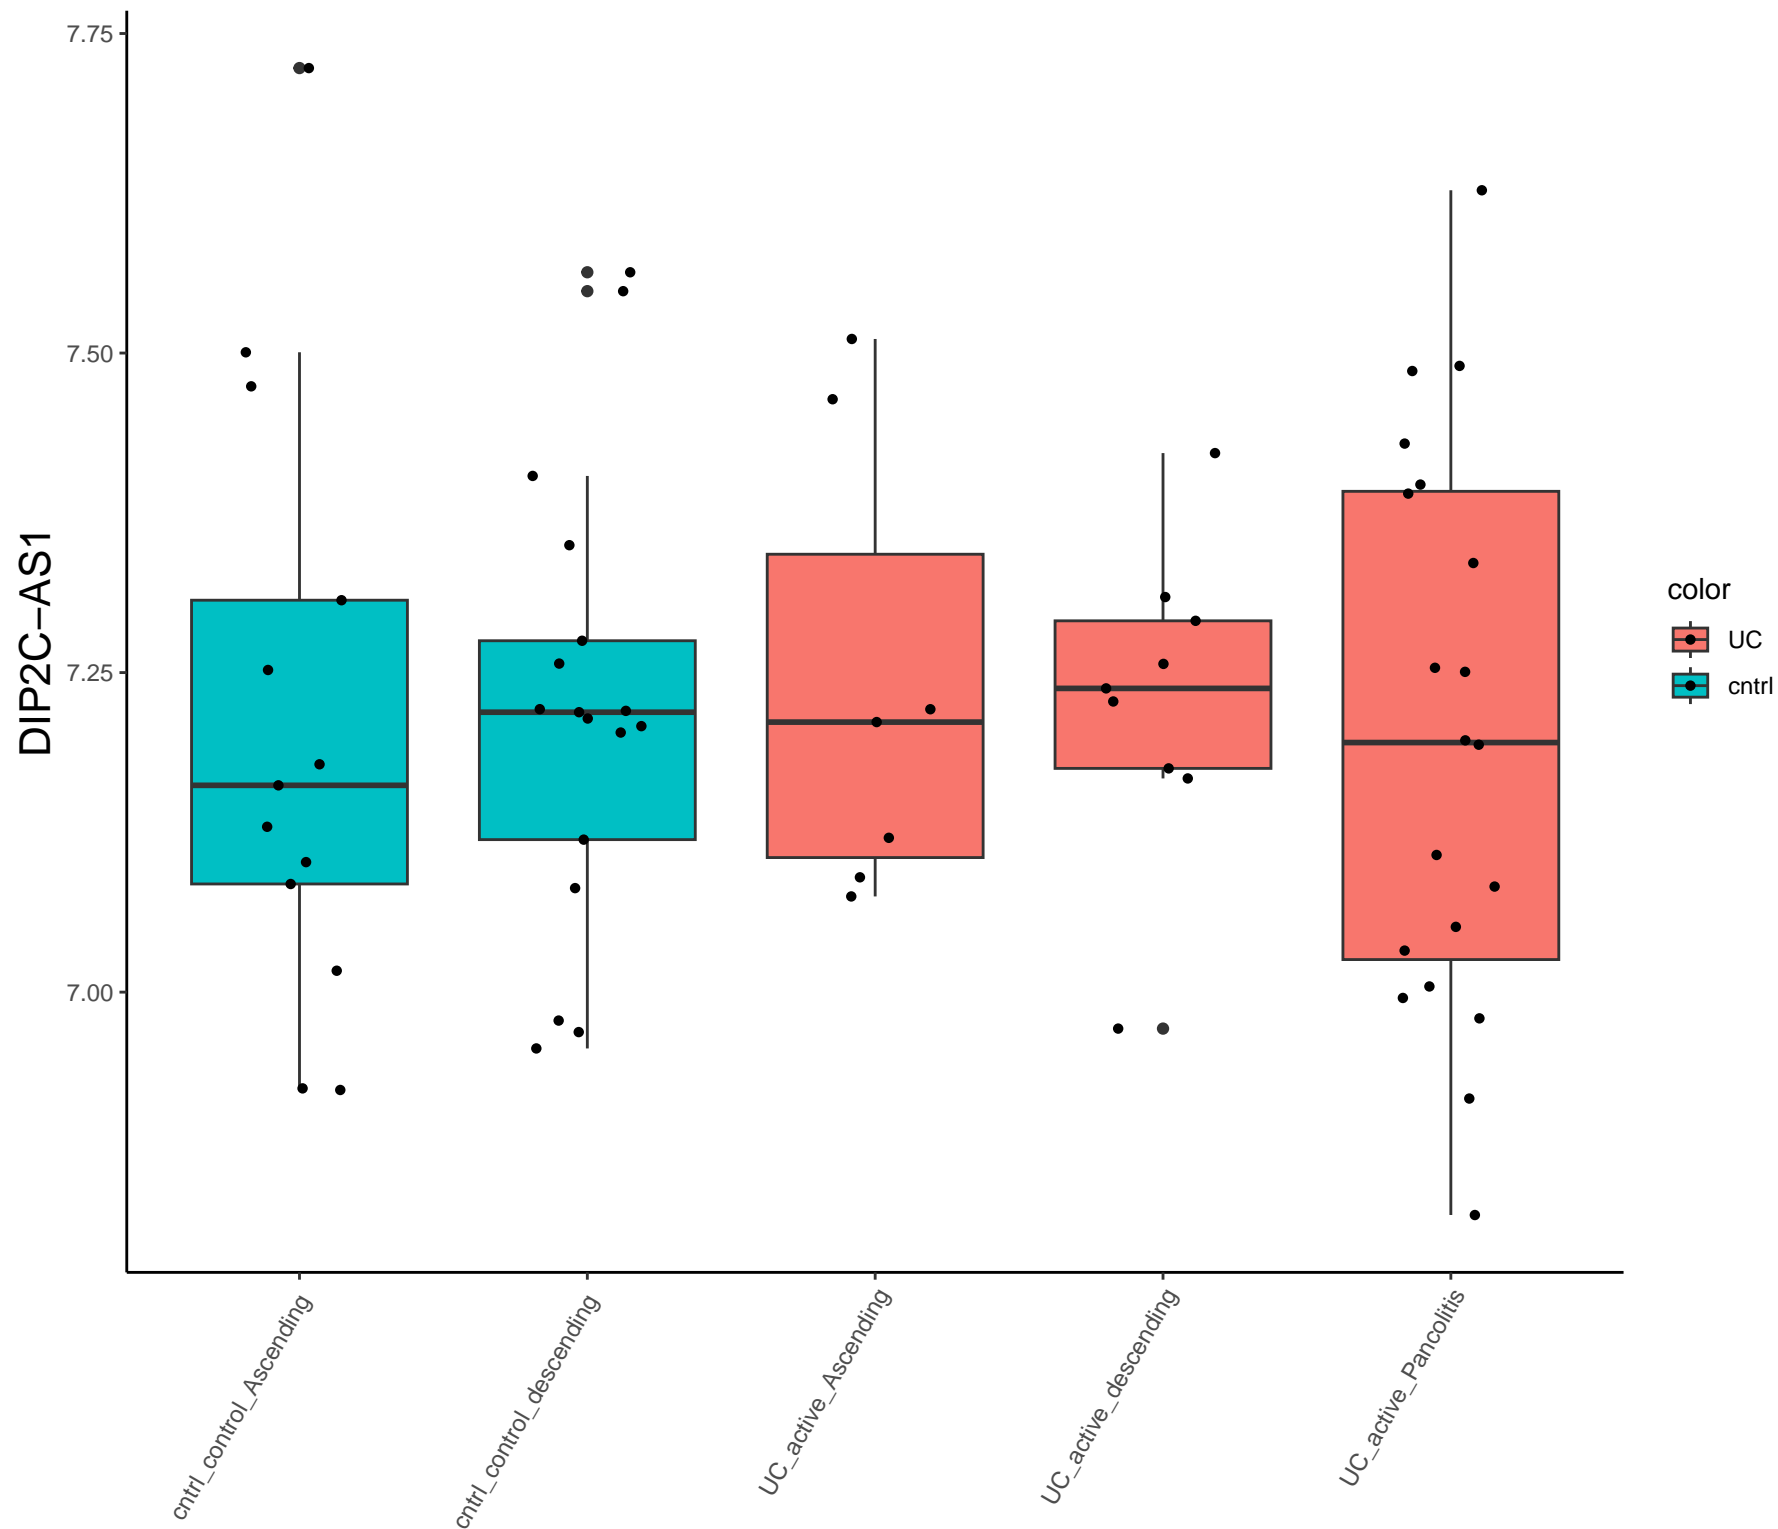

GSE48958

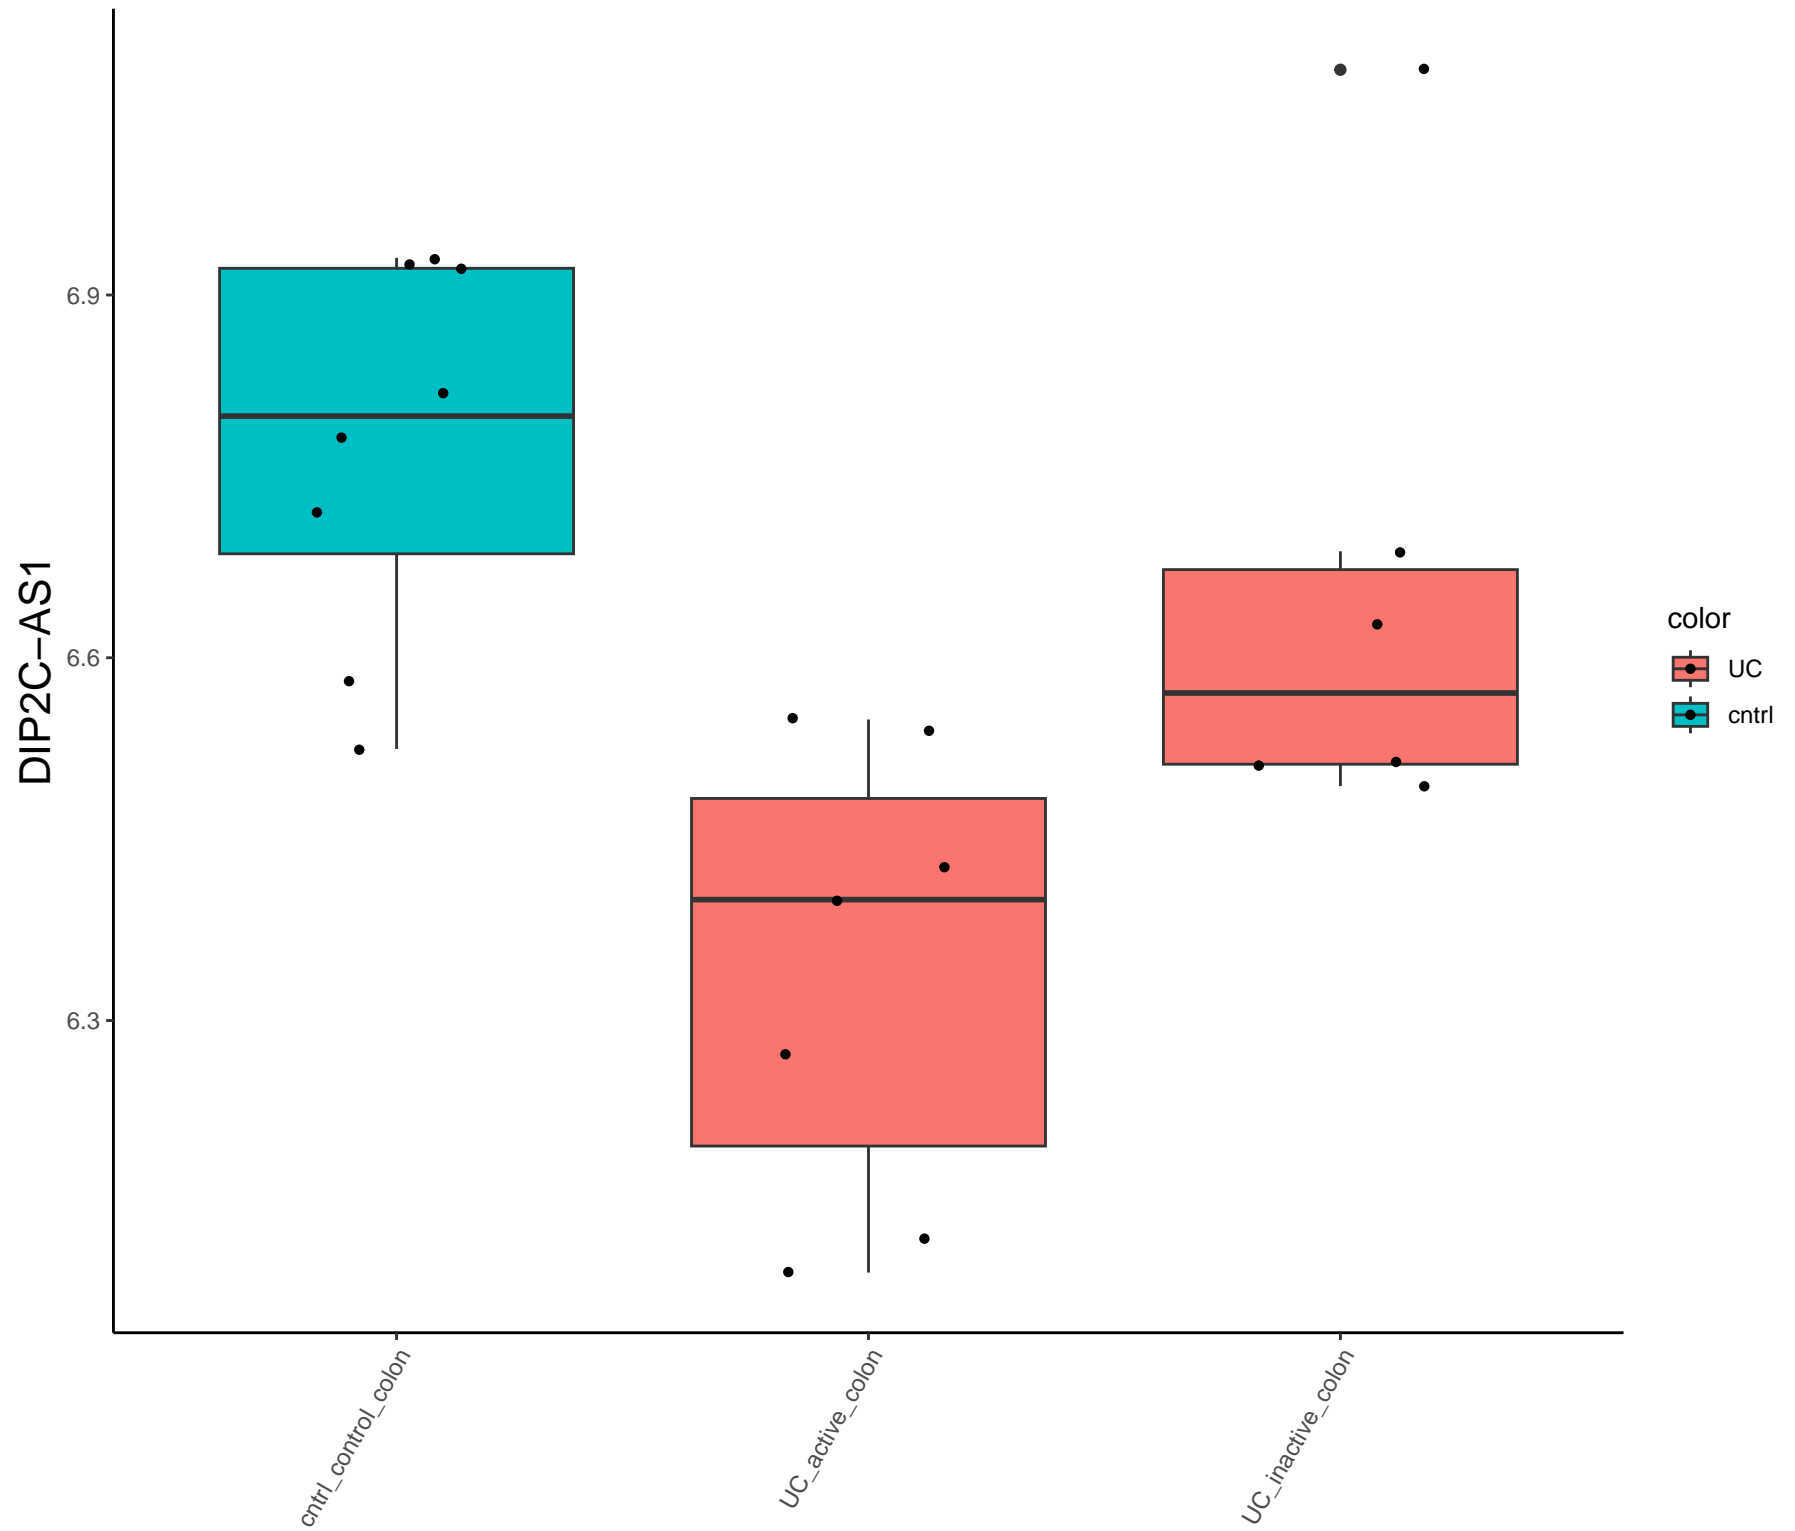

GSE59071

DIP2C-AS1

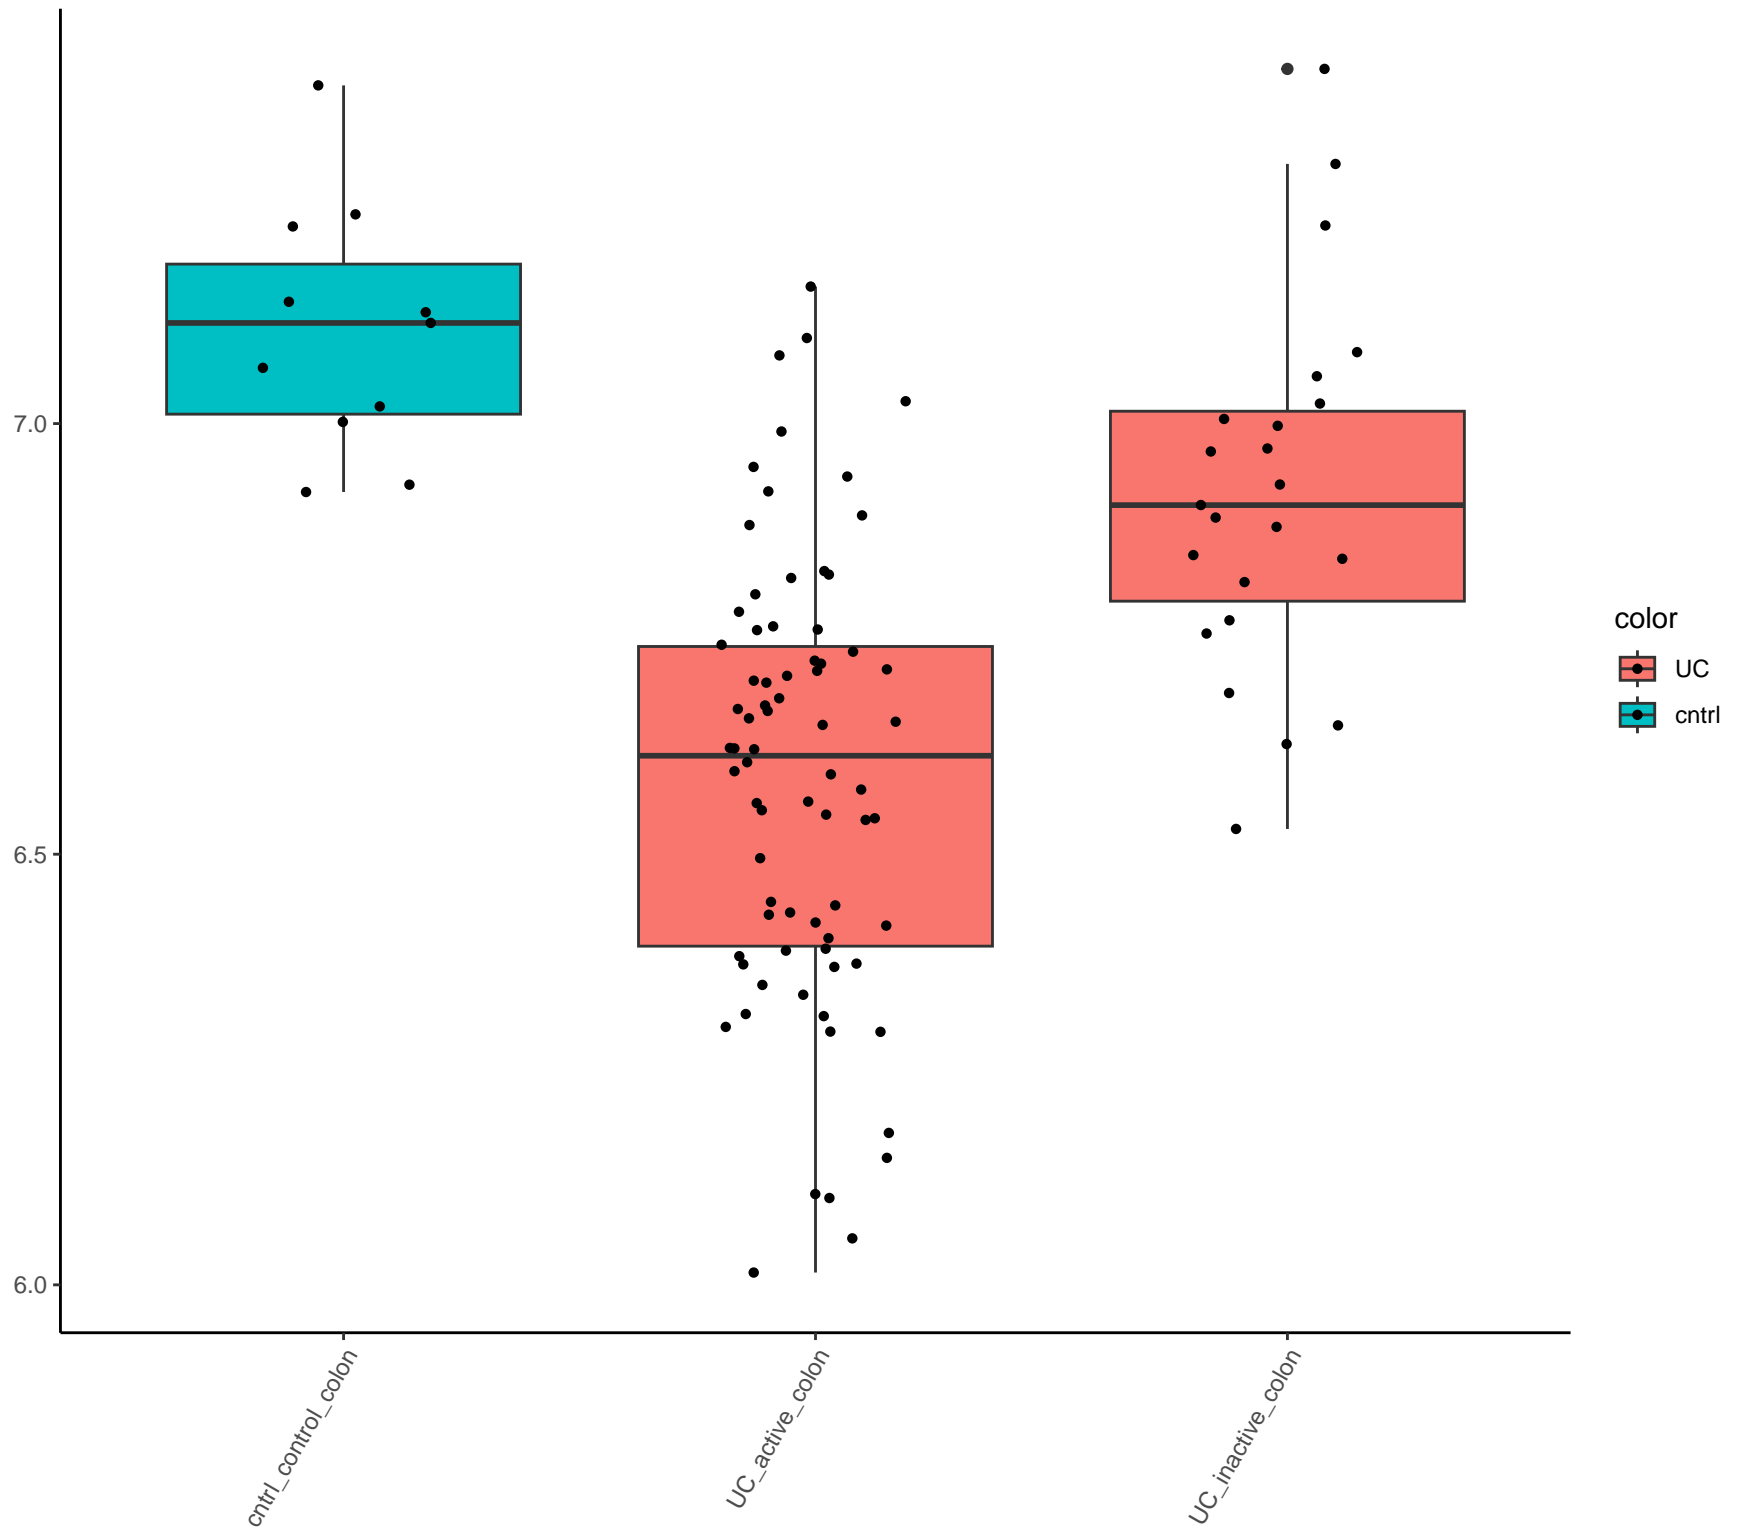

GSE128682

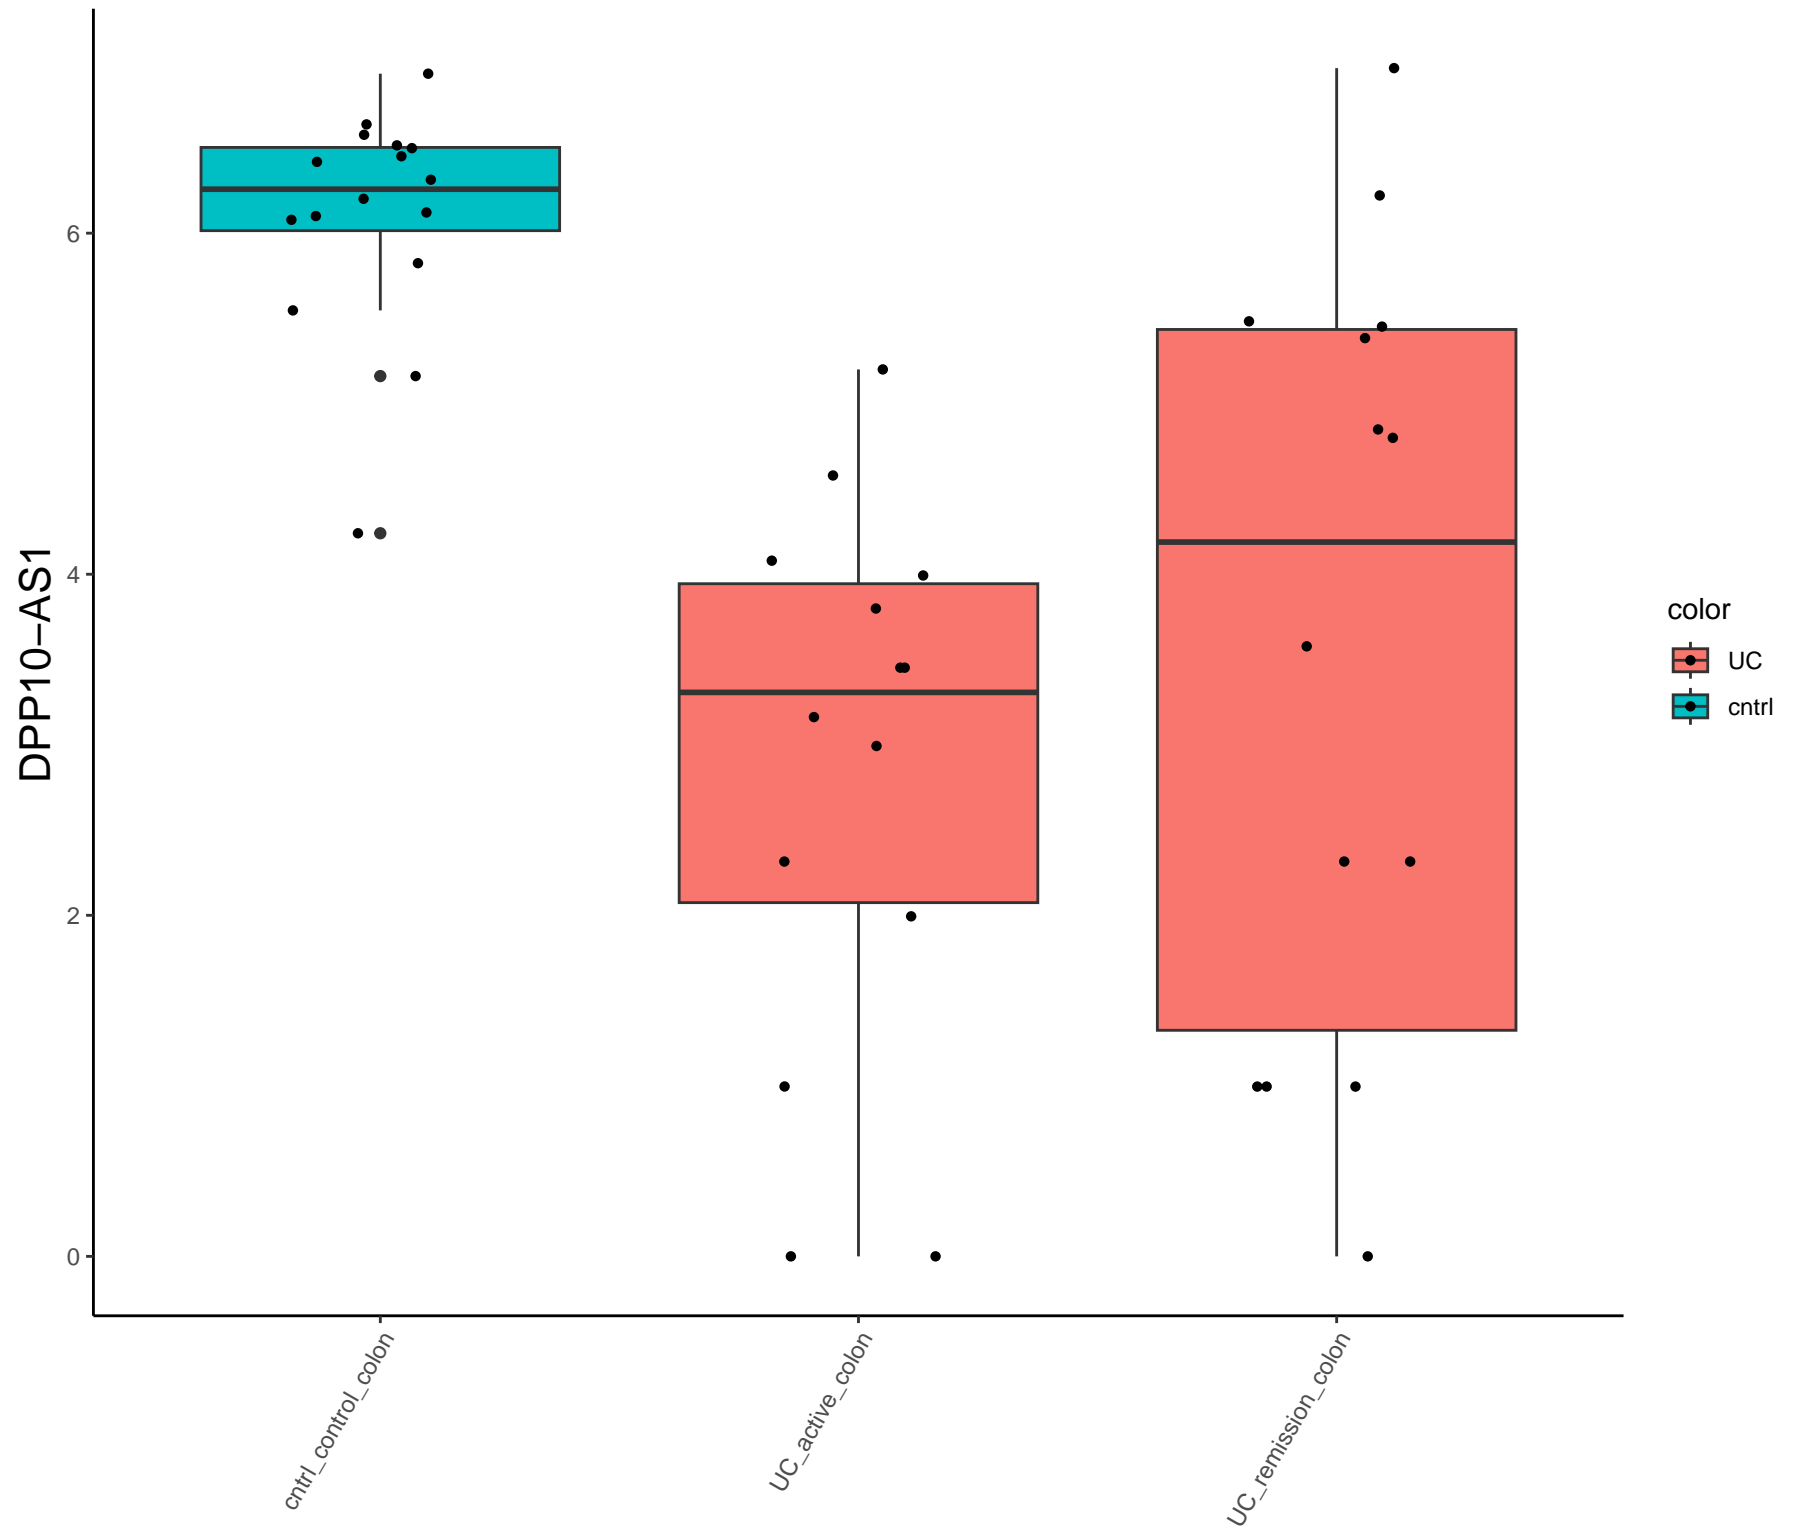

GSE38713

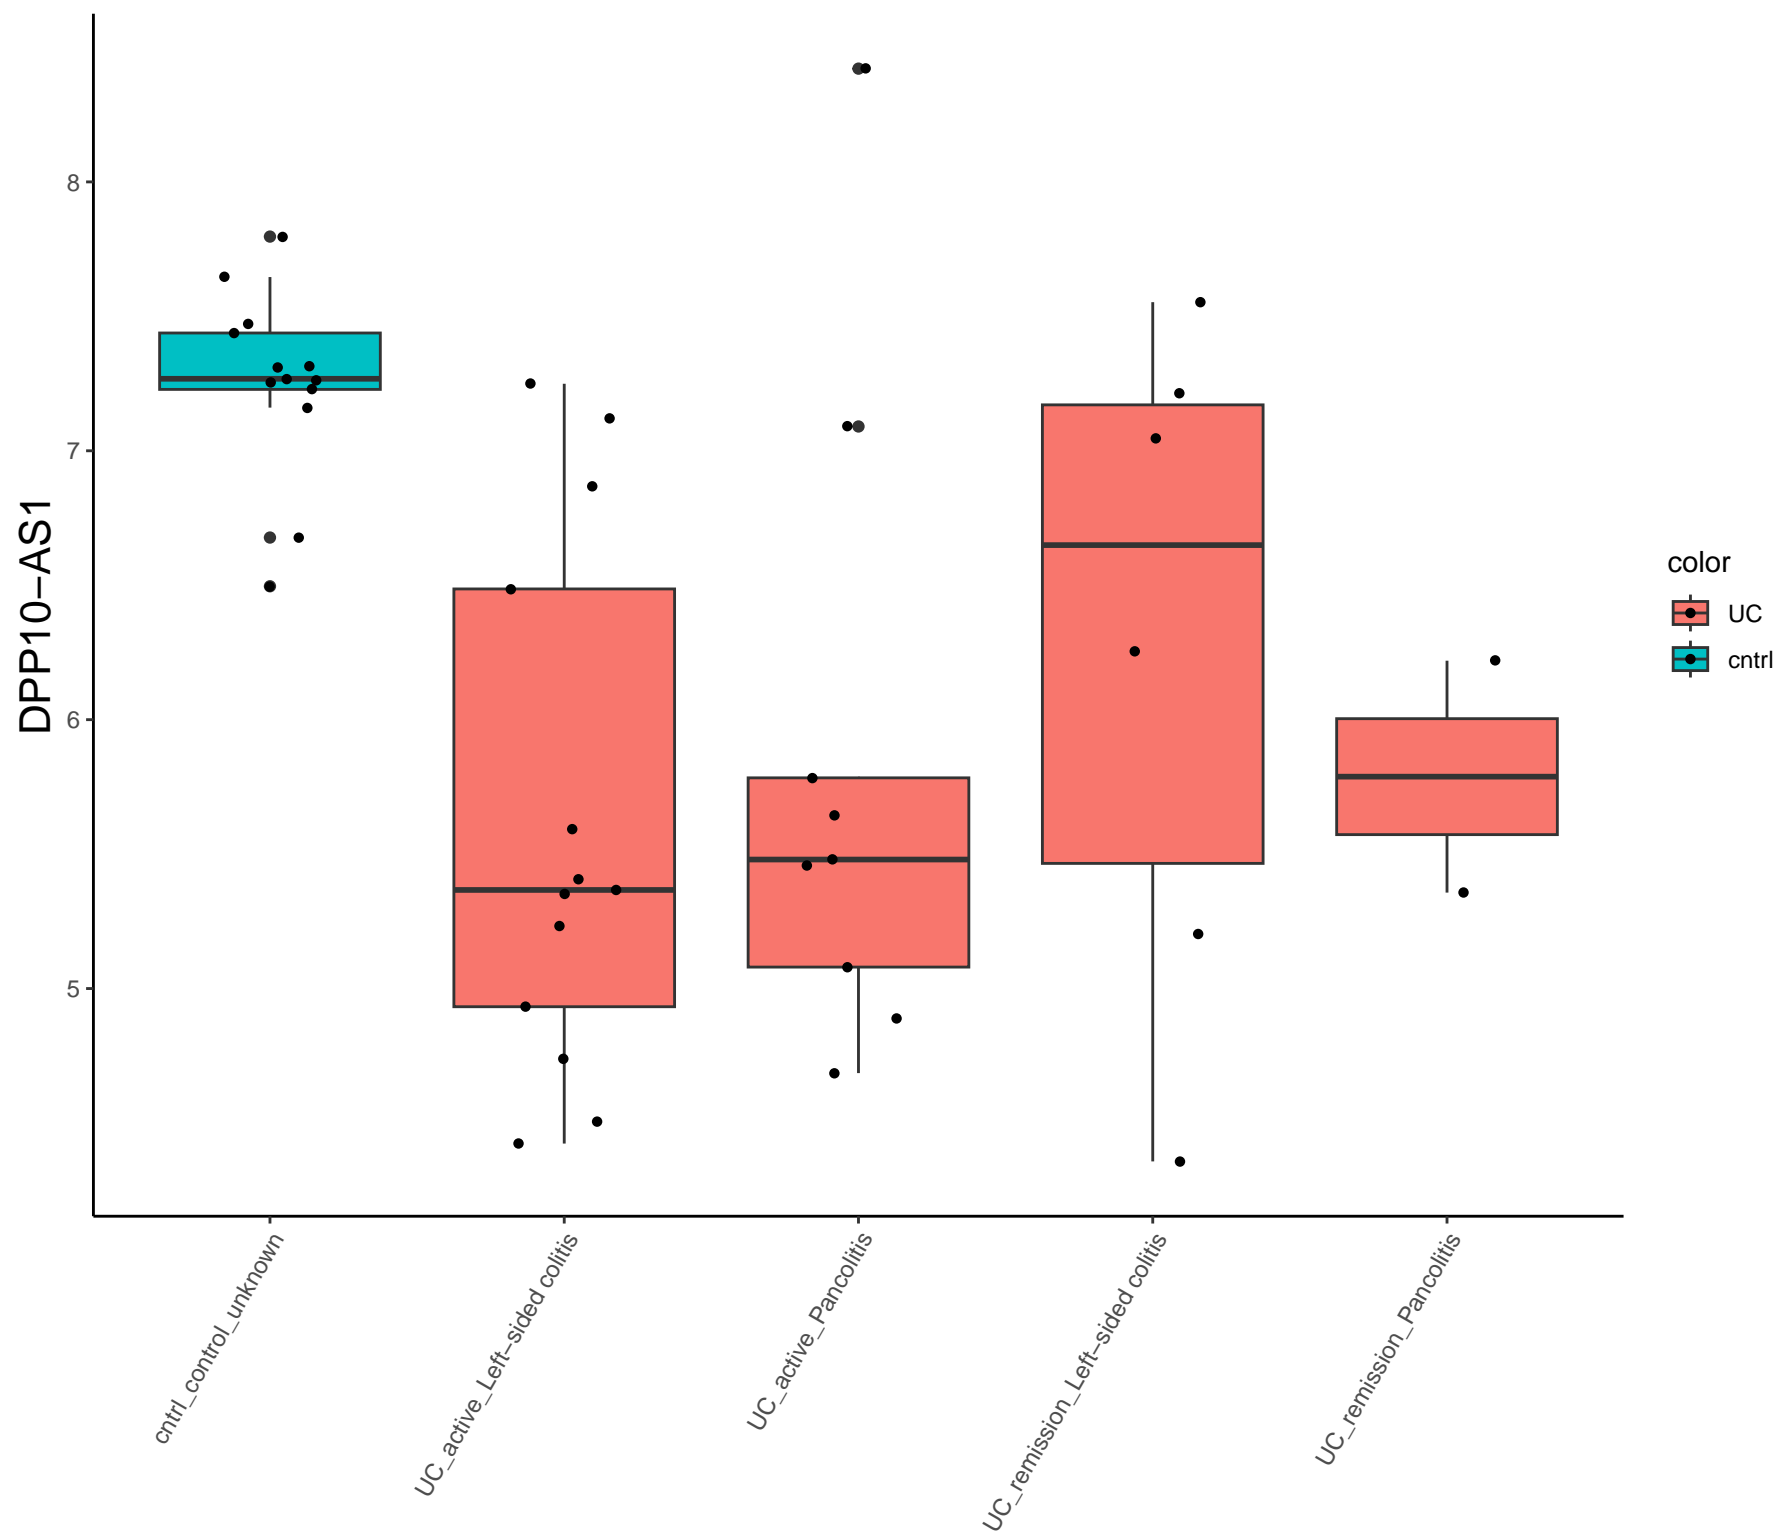



GSE9452

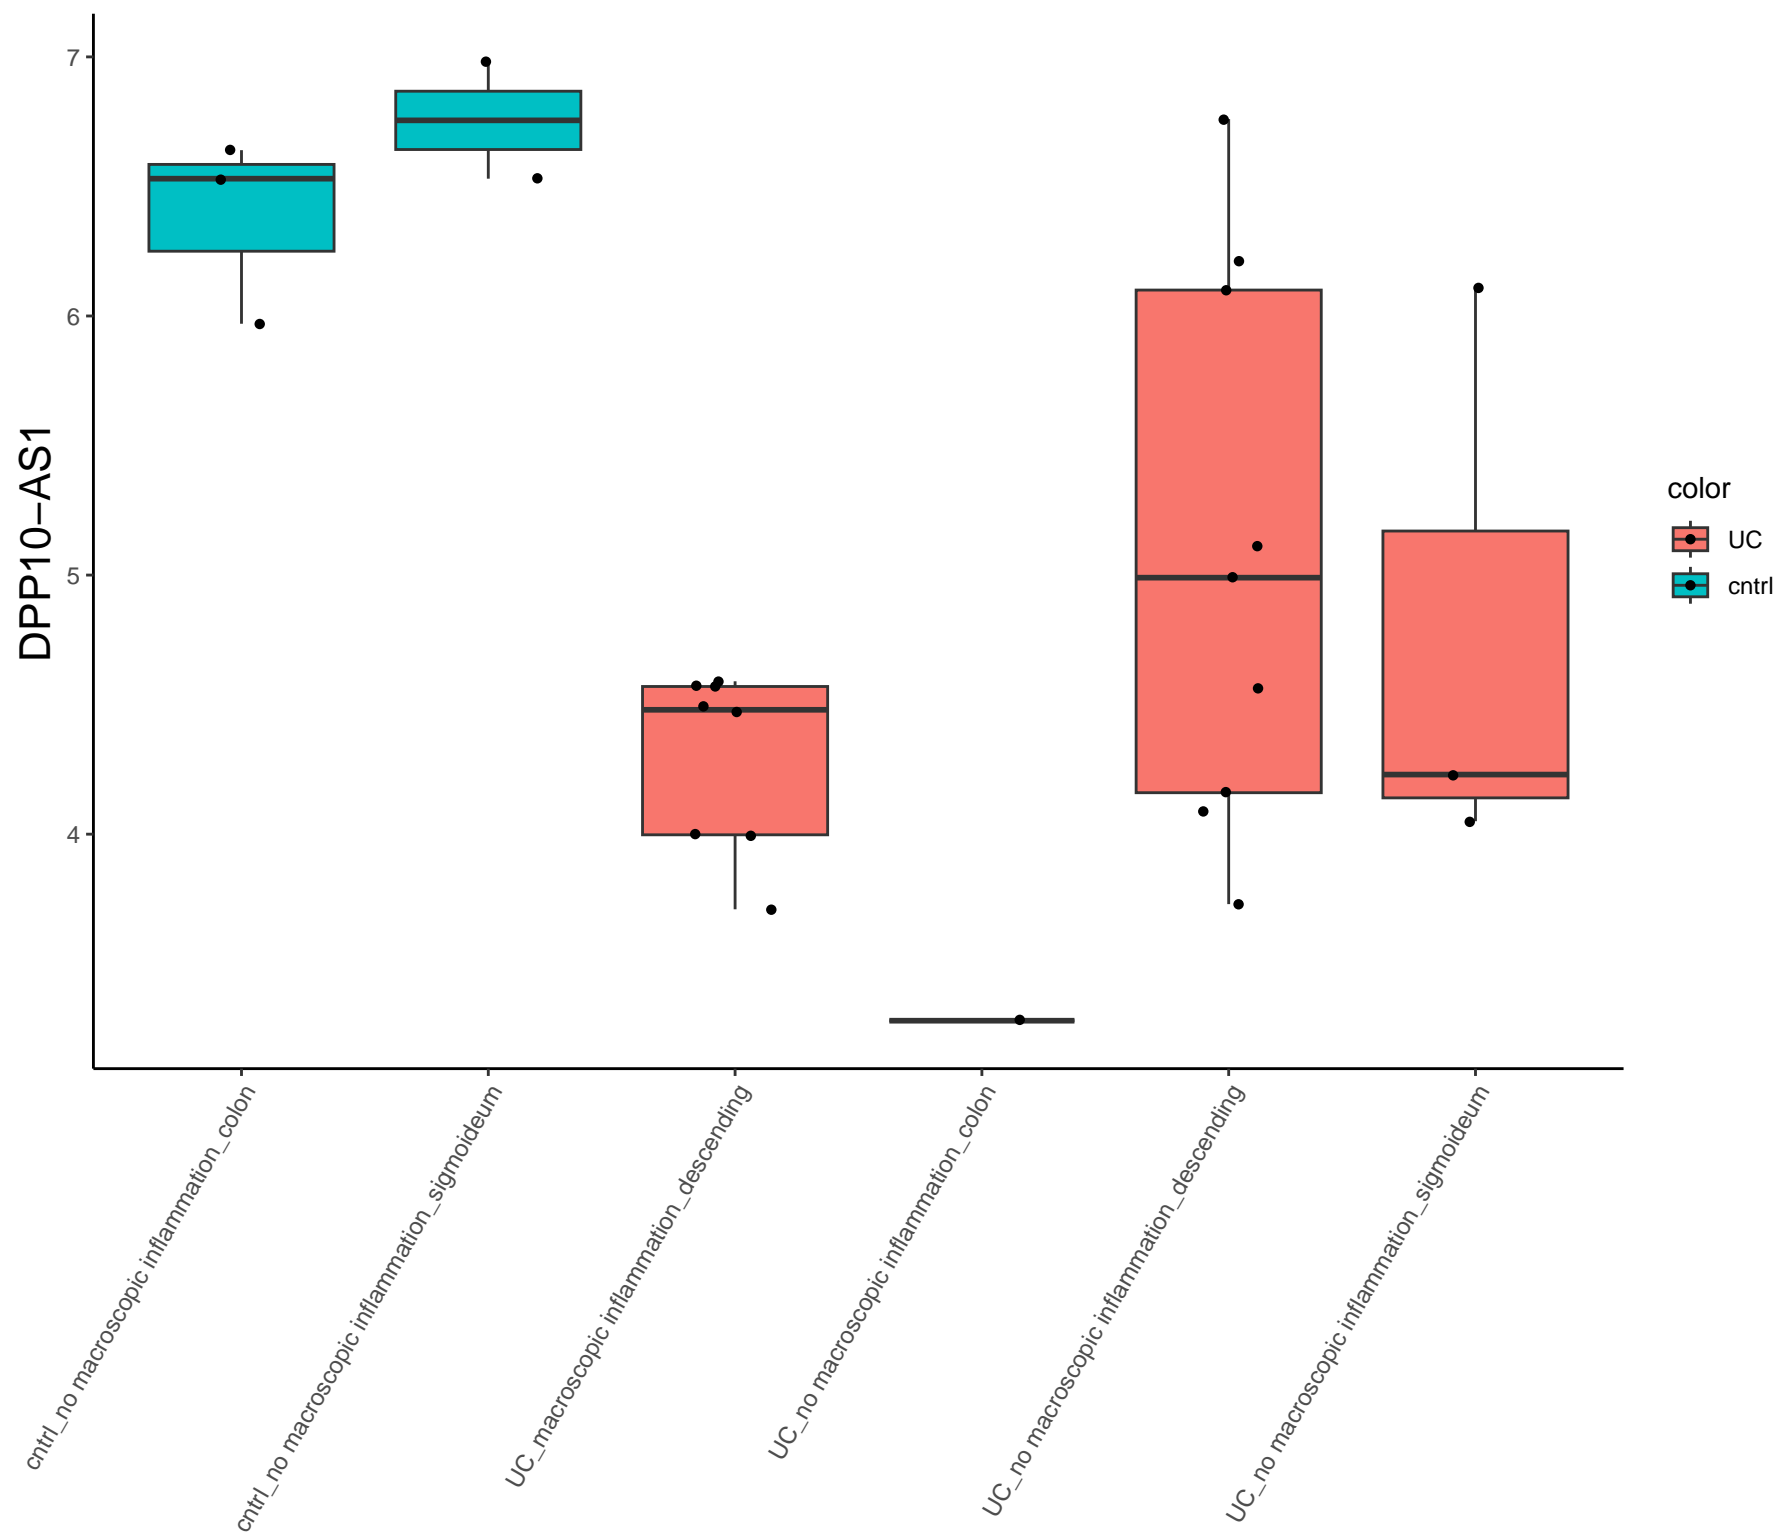

## GSE107499

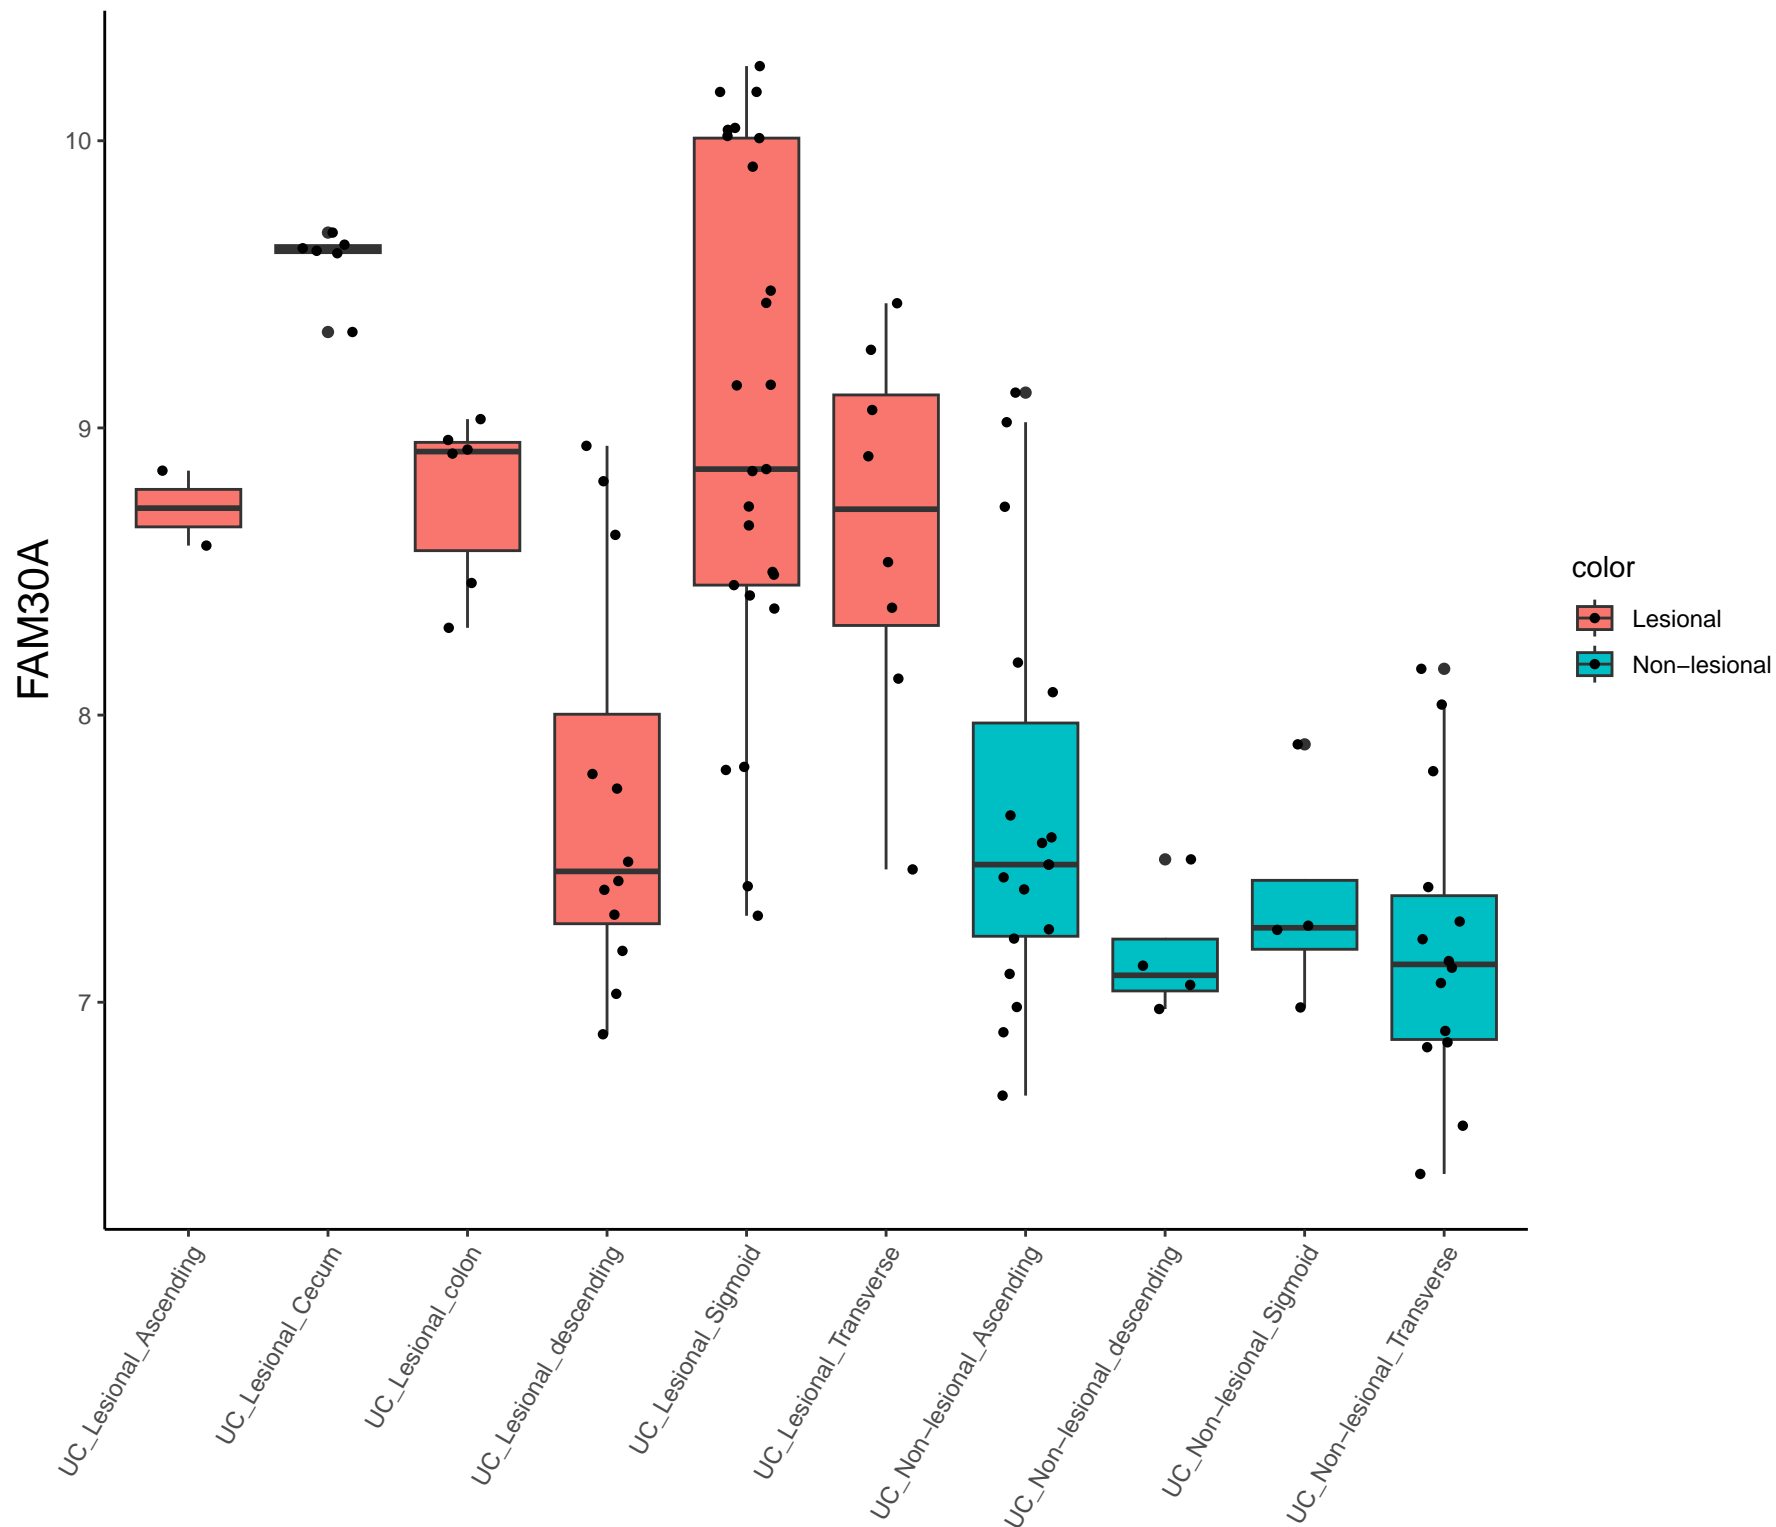

GSE128682

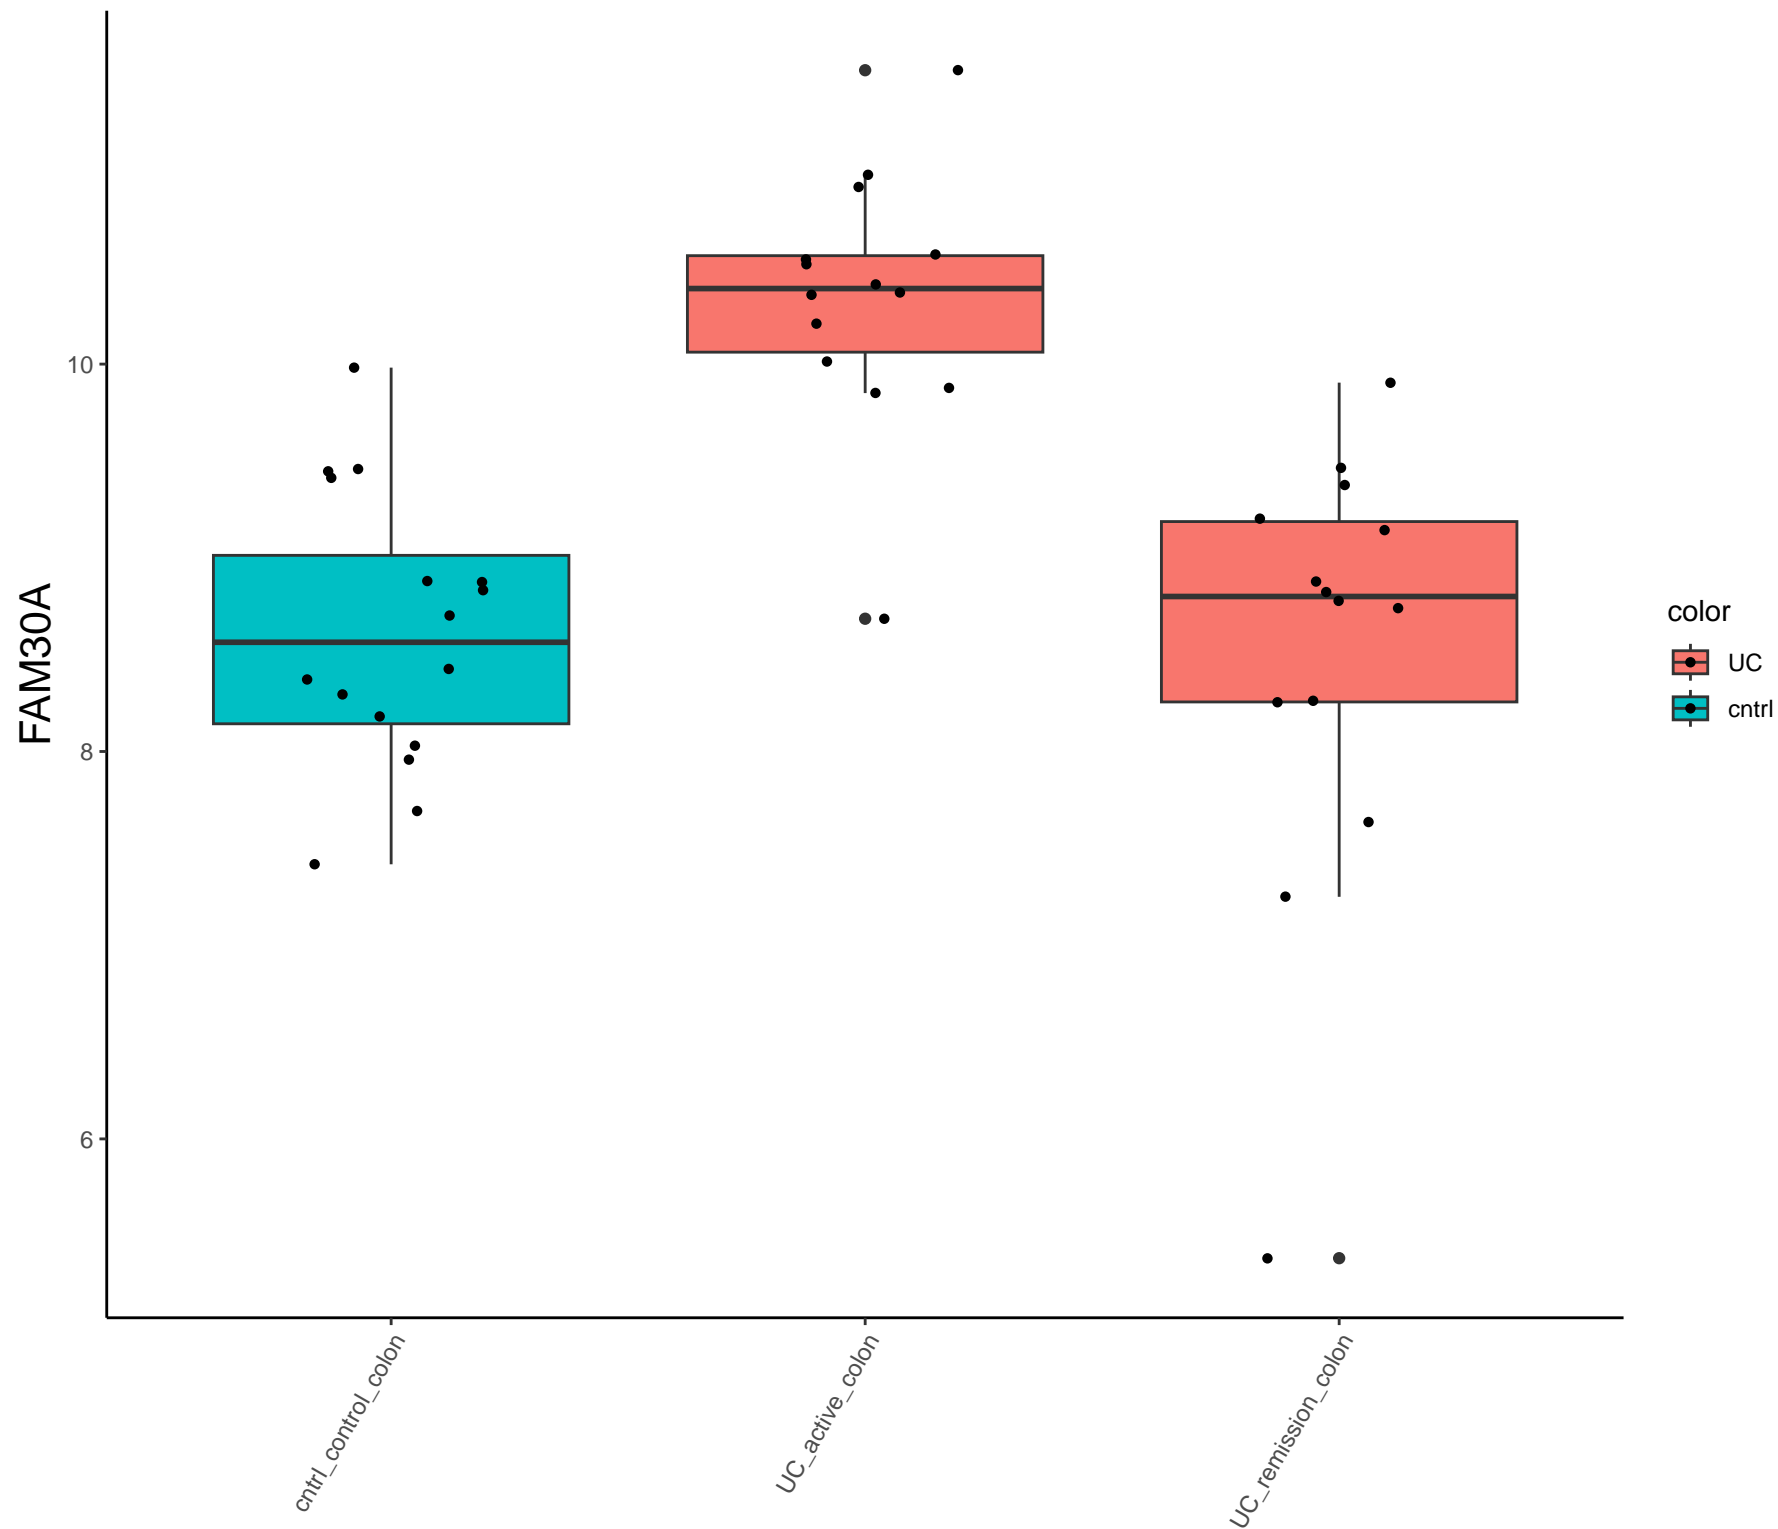

GSE38713

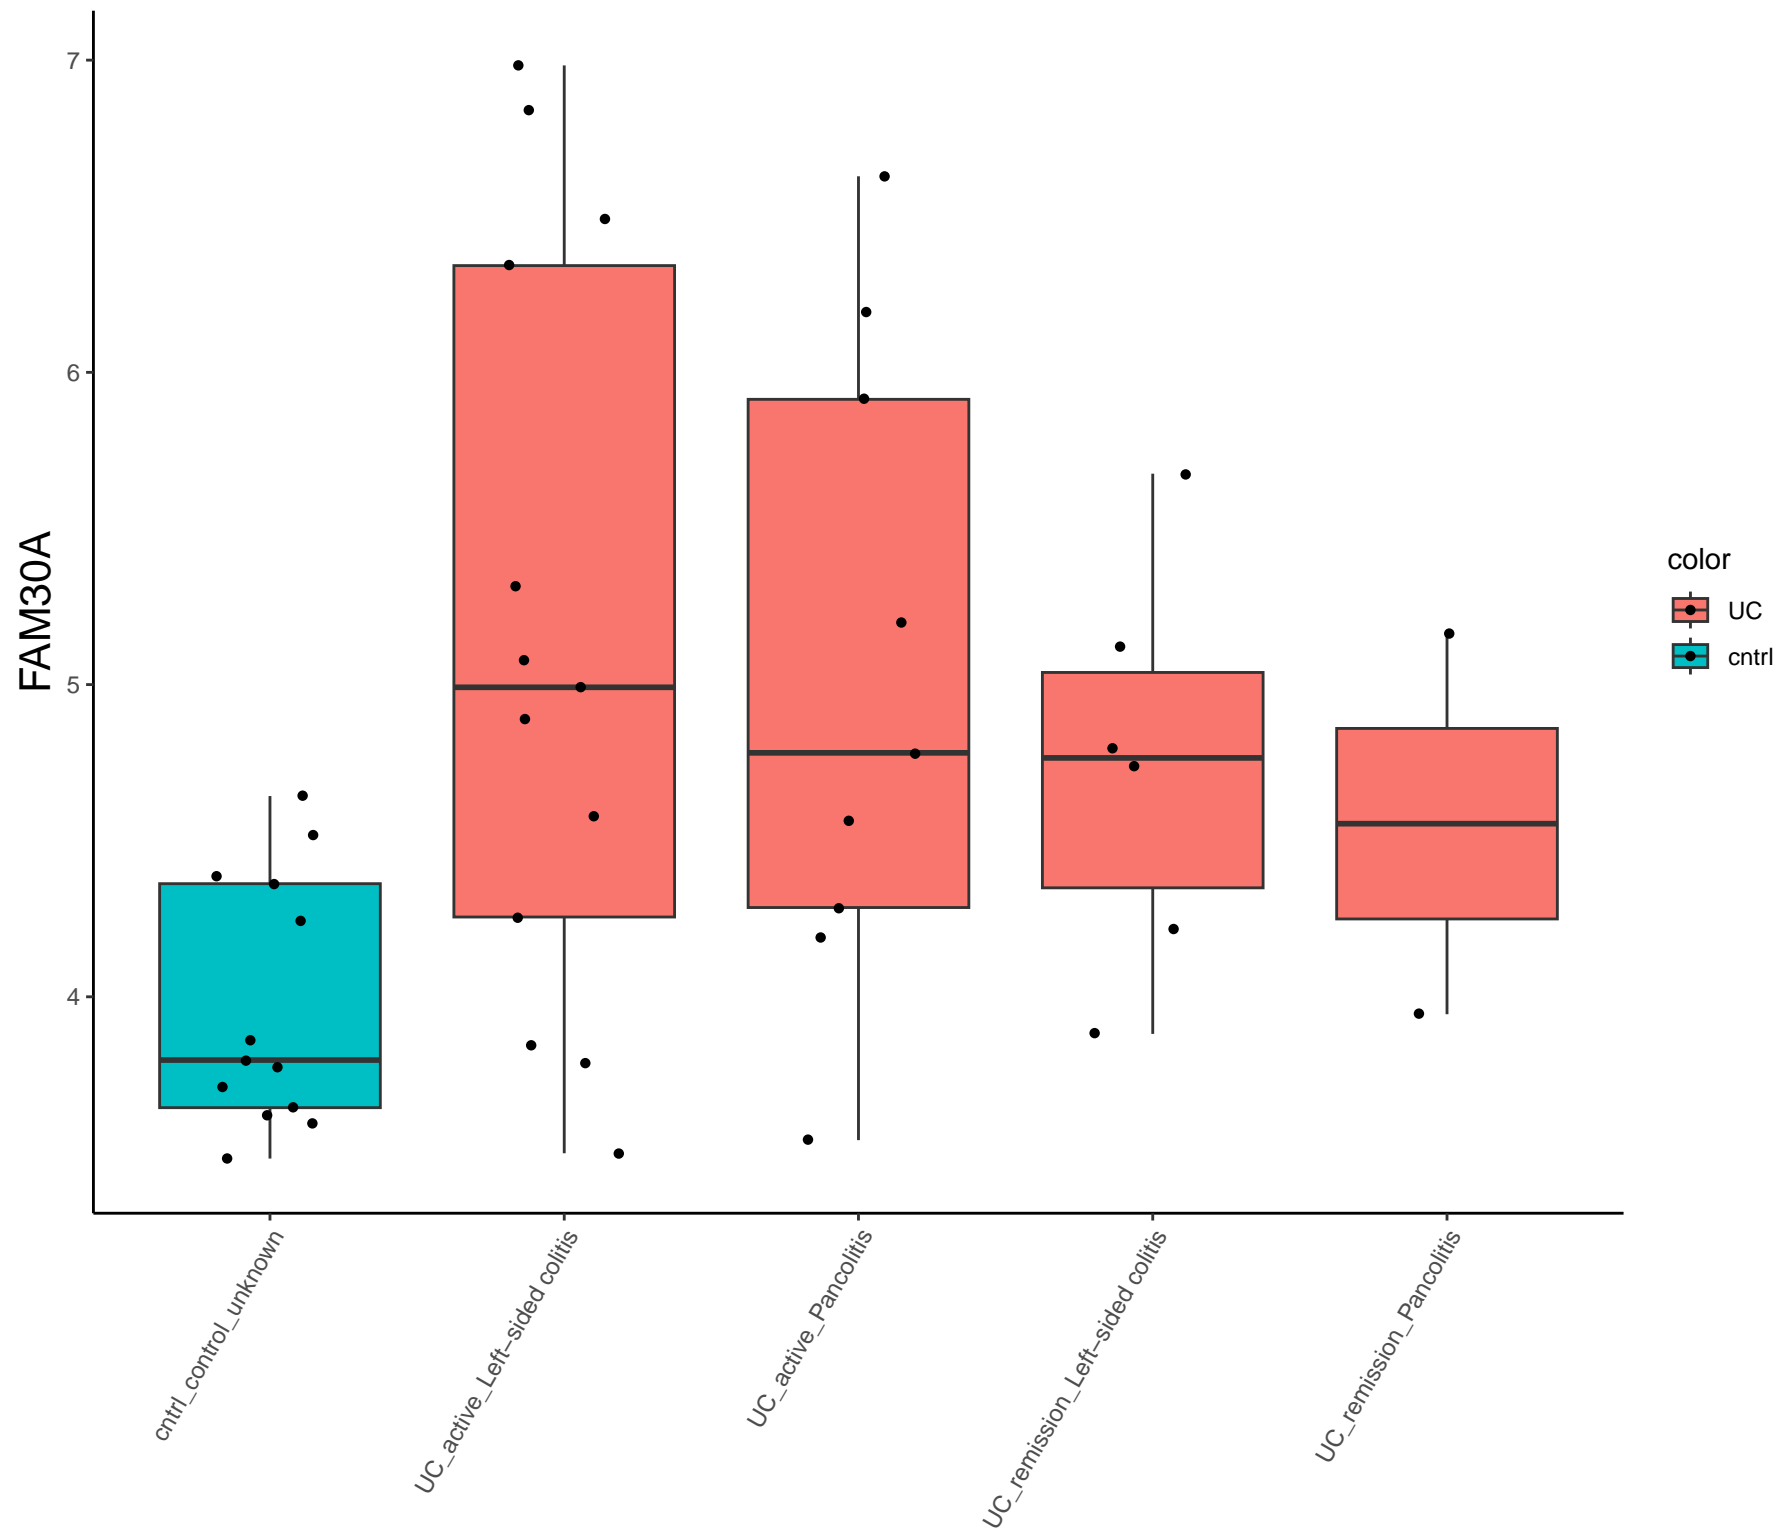

GSE48634

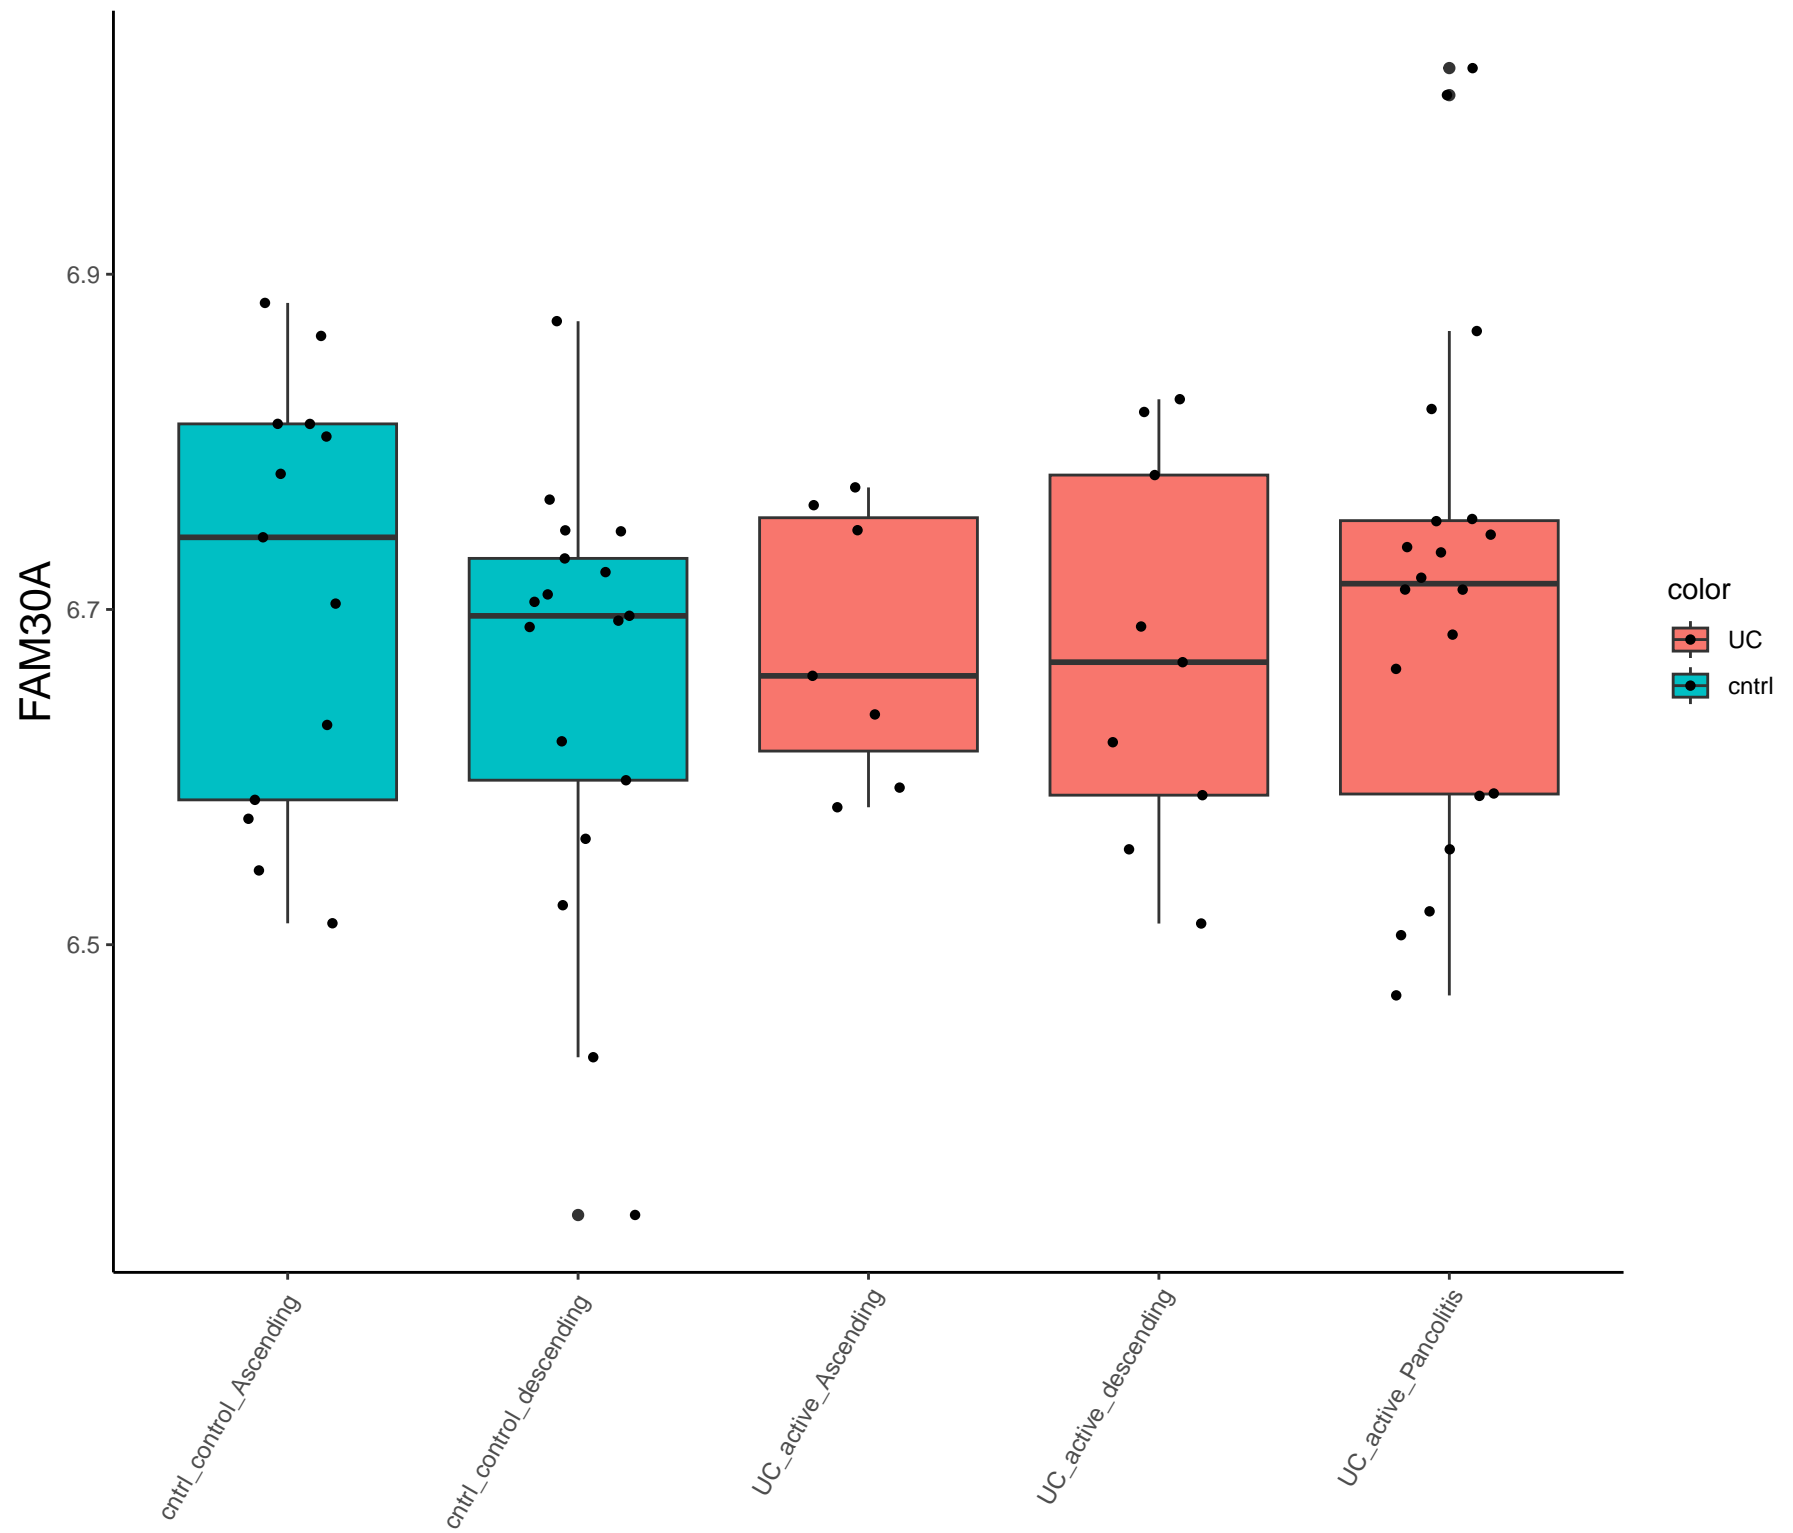

GSE48958

FAM30A

color  
UC  
cntrl

cntrl\_control\_colon

UC\_active\_colon

UC\_inactive\_colon

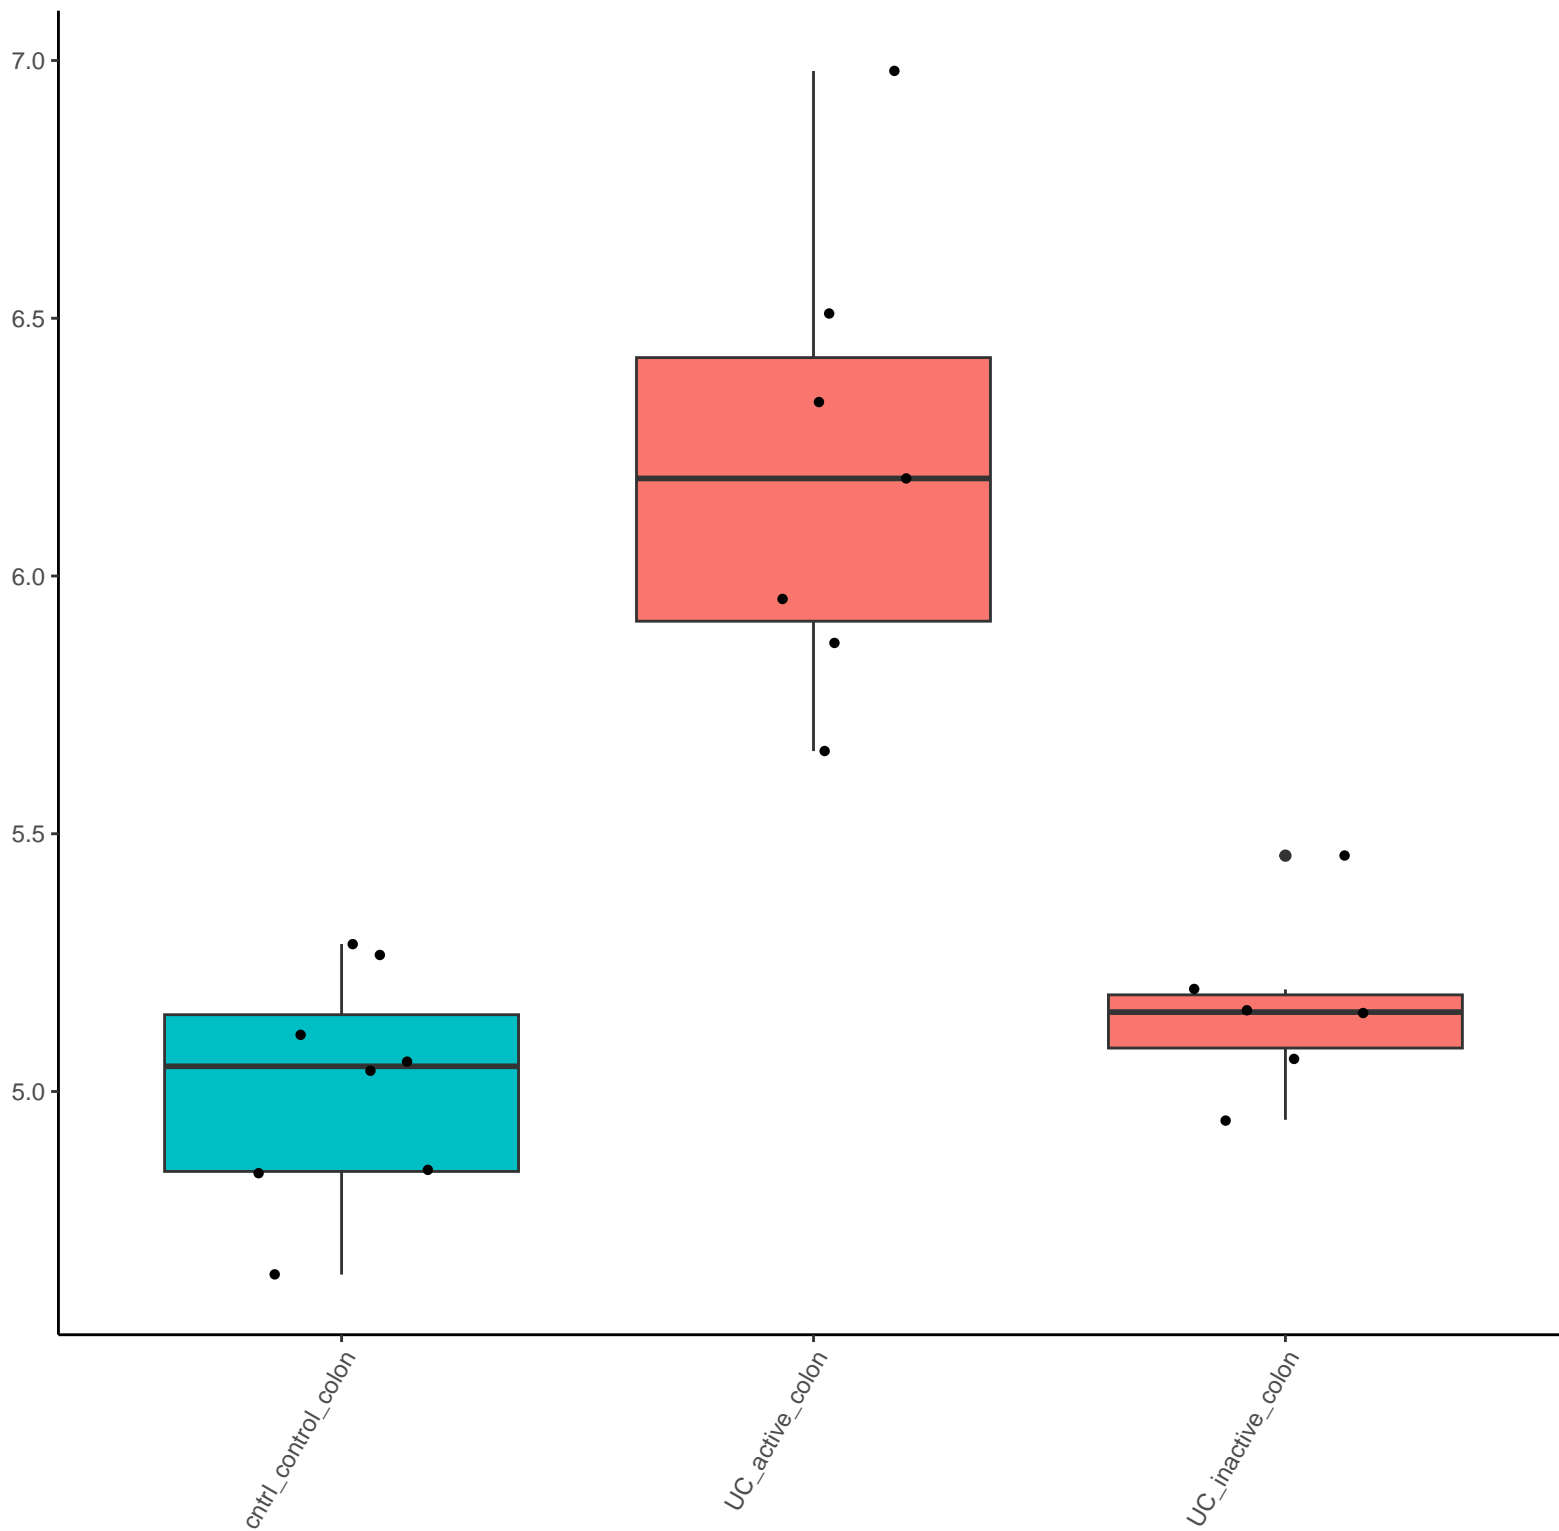

GSE59071

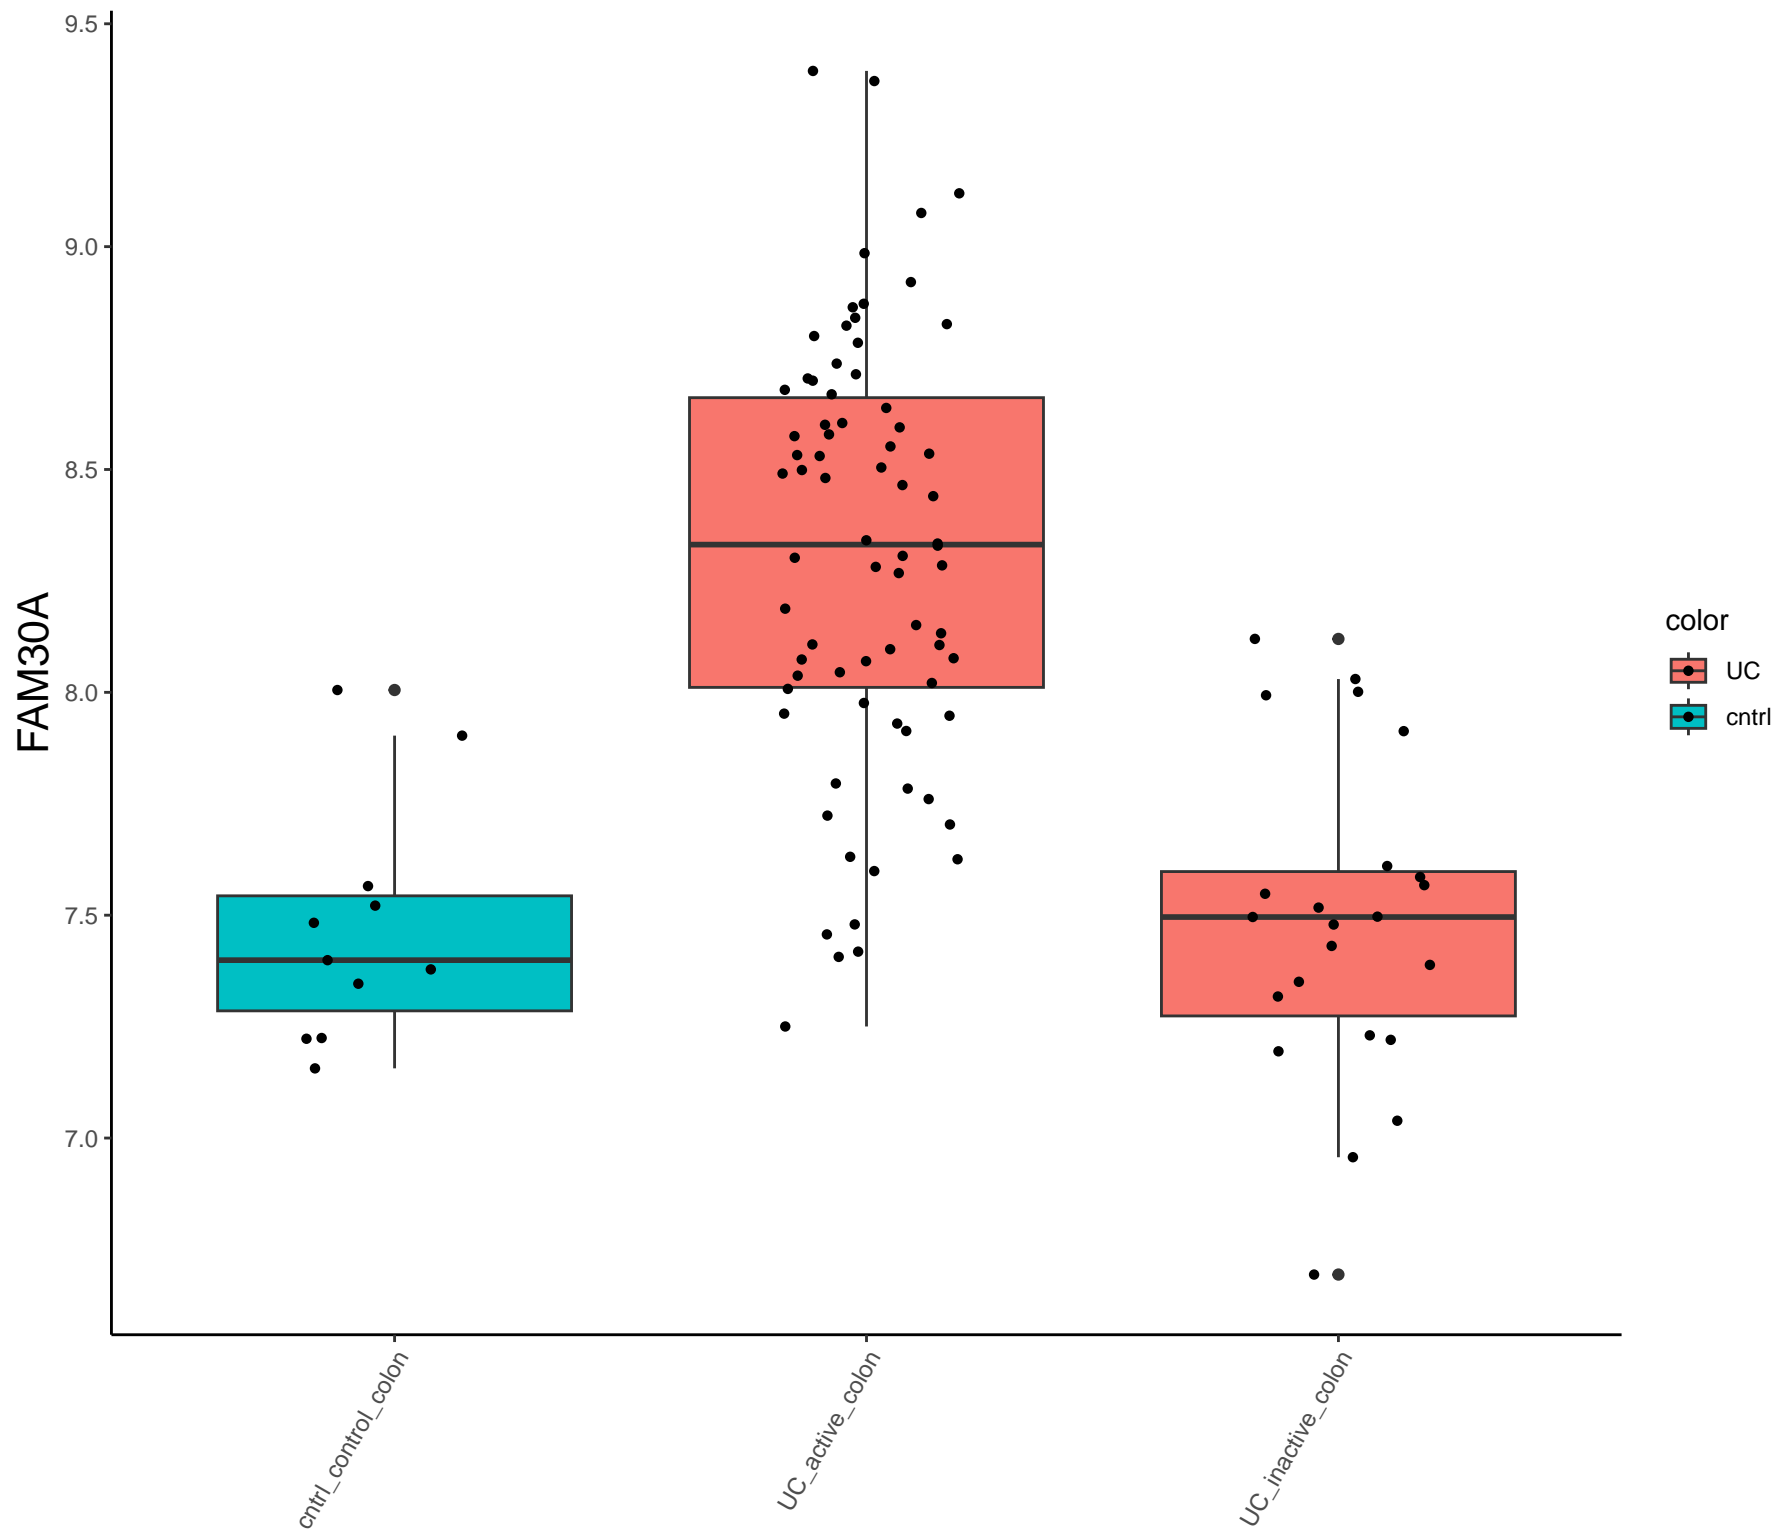

GSE9452

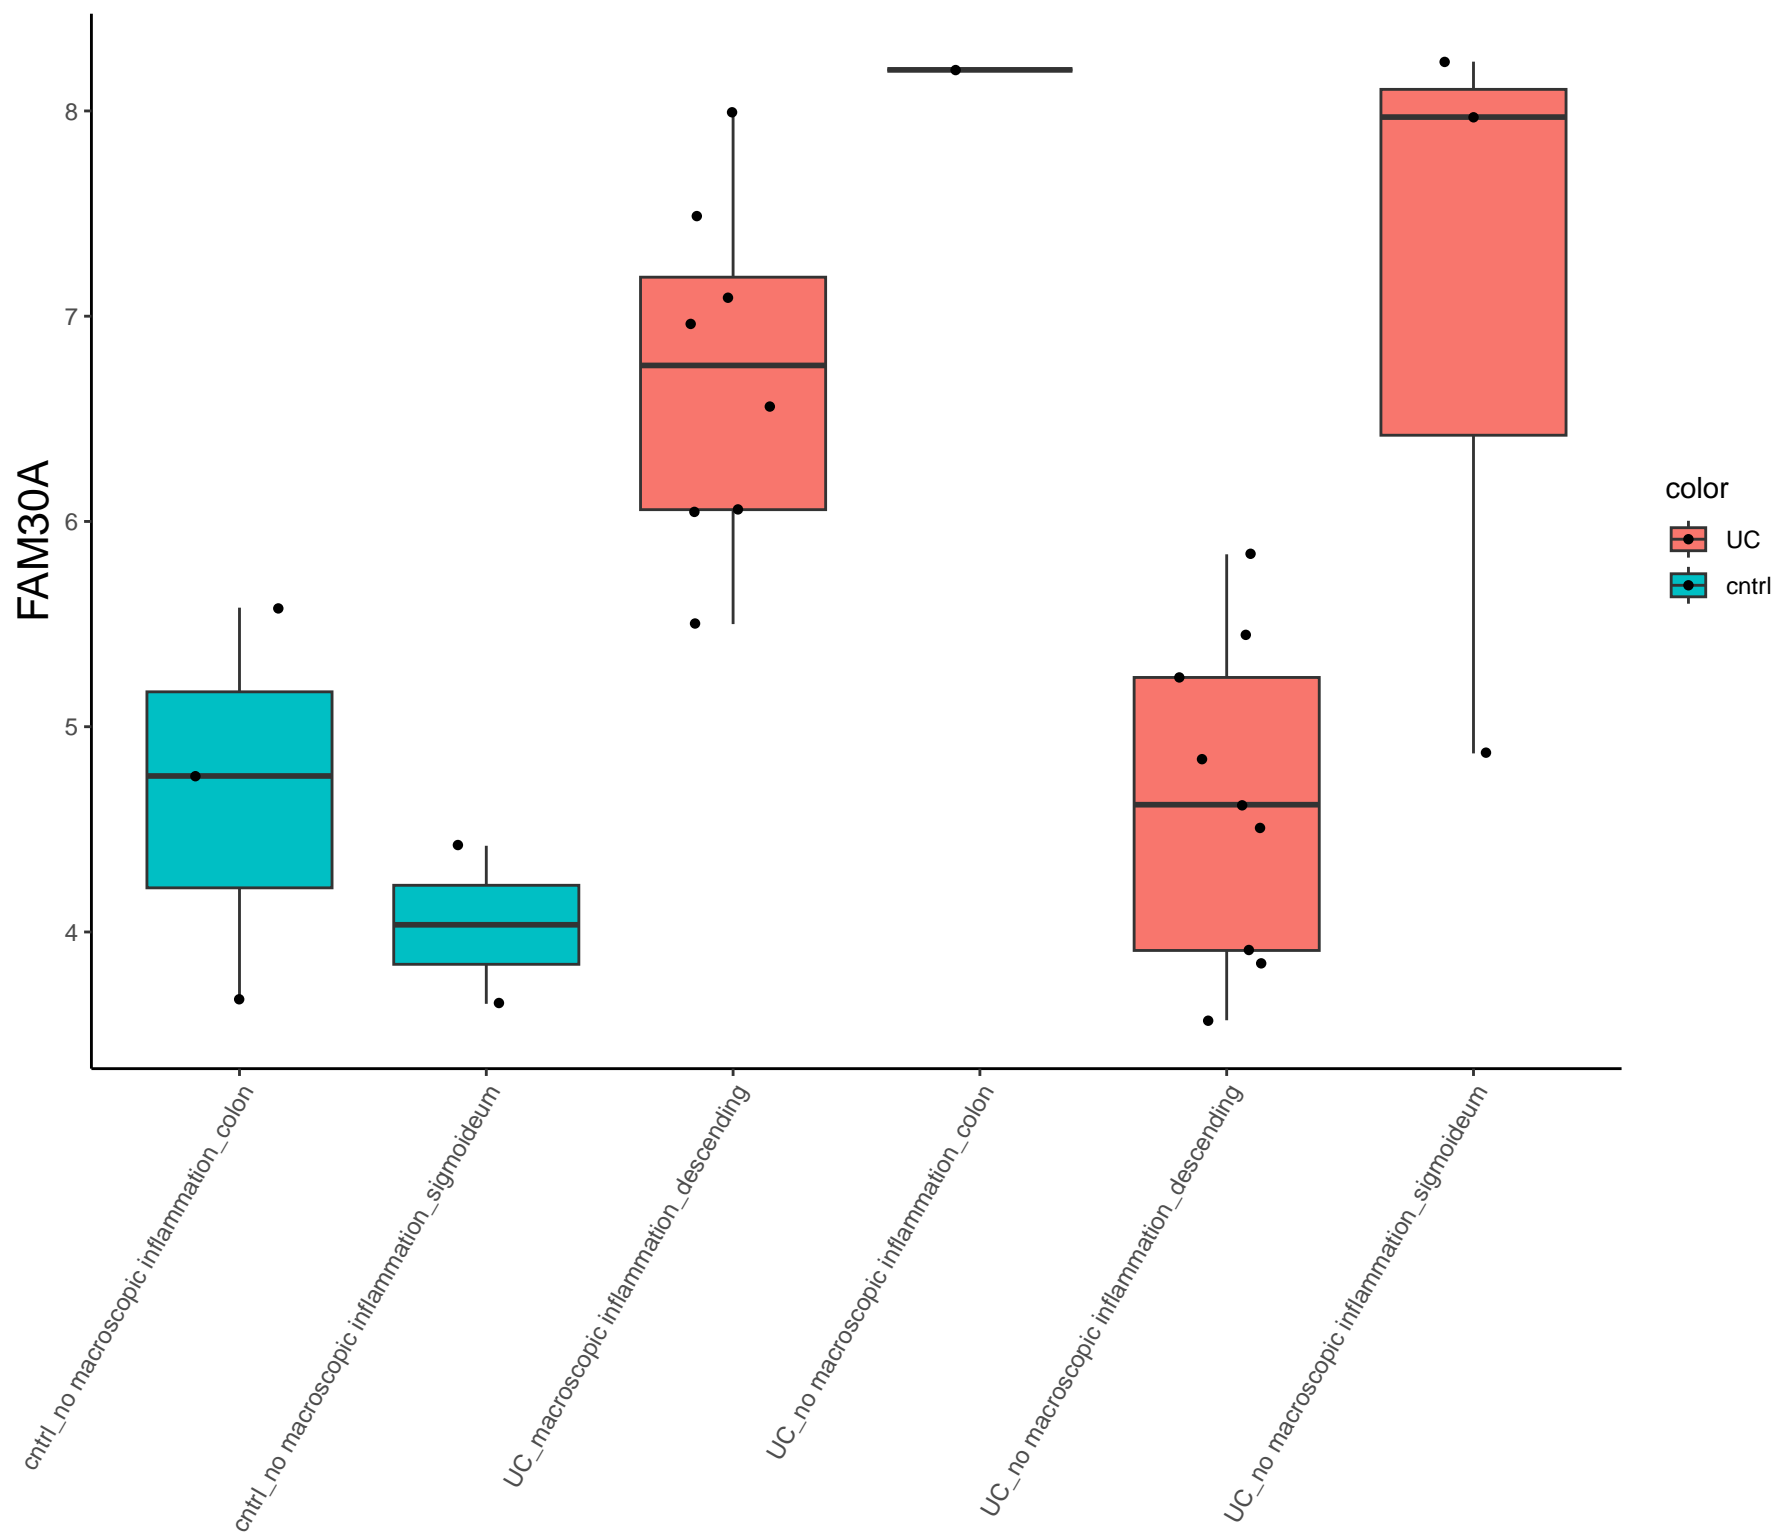



GSE128682

FLJ32255

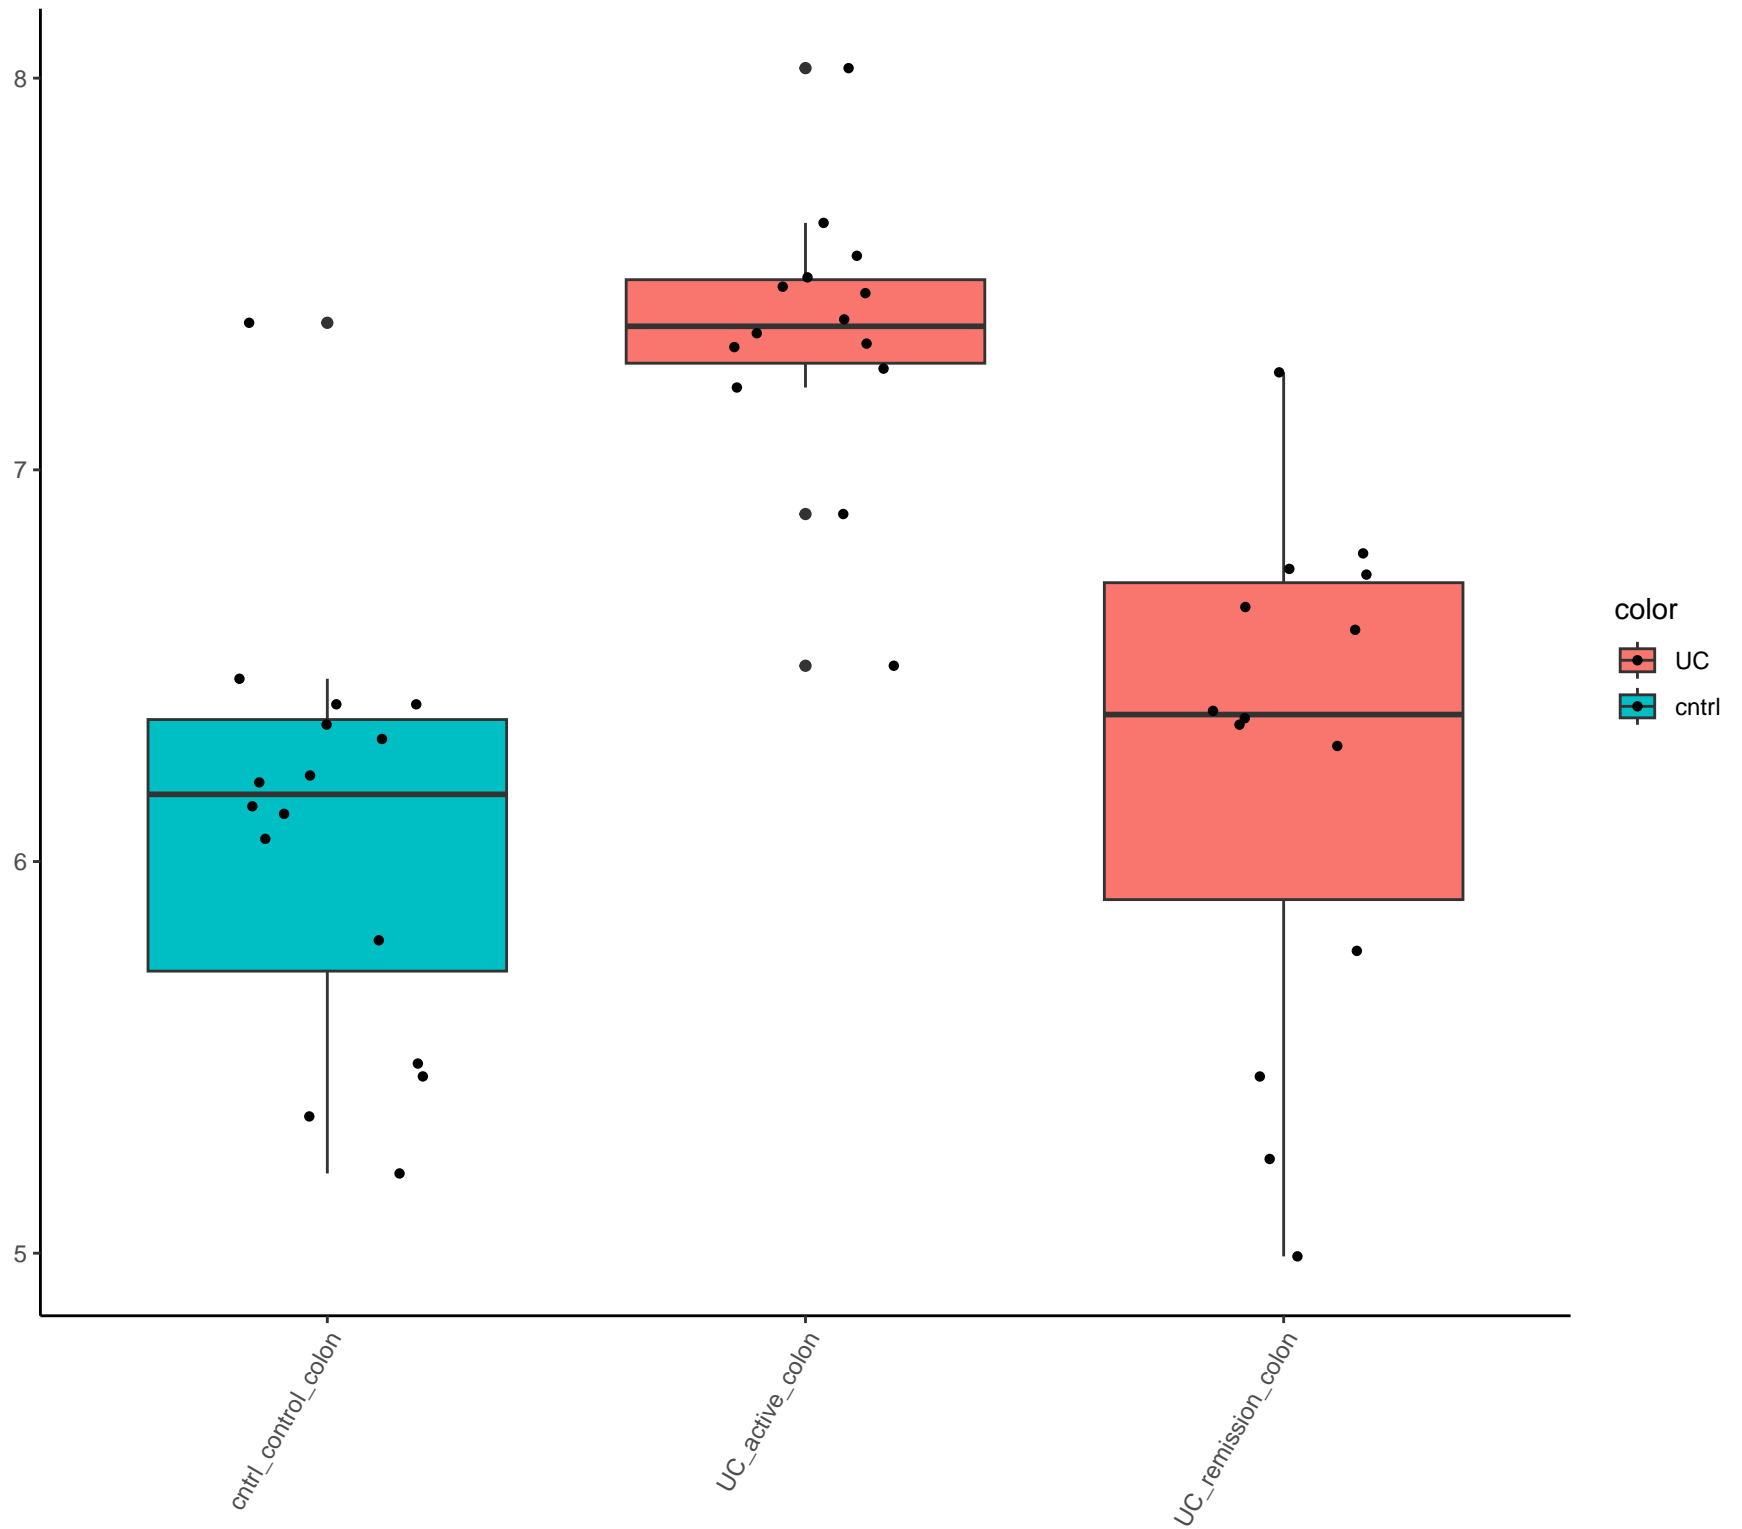

GSE38713

FLJ32255

color  
UC  
cntrl

cntrl\_control\_unknown

UC\_active\_Left-sided colitis

UC\_active\_Pancolitis

UC\_remission\_Left-sided colitis

UC\_remission\_Pancolitis

4.0  
4.5  
5.0  
5.5  
6.0

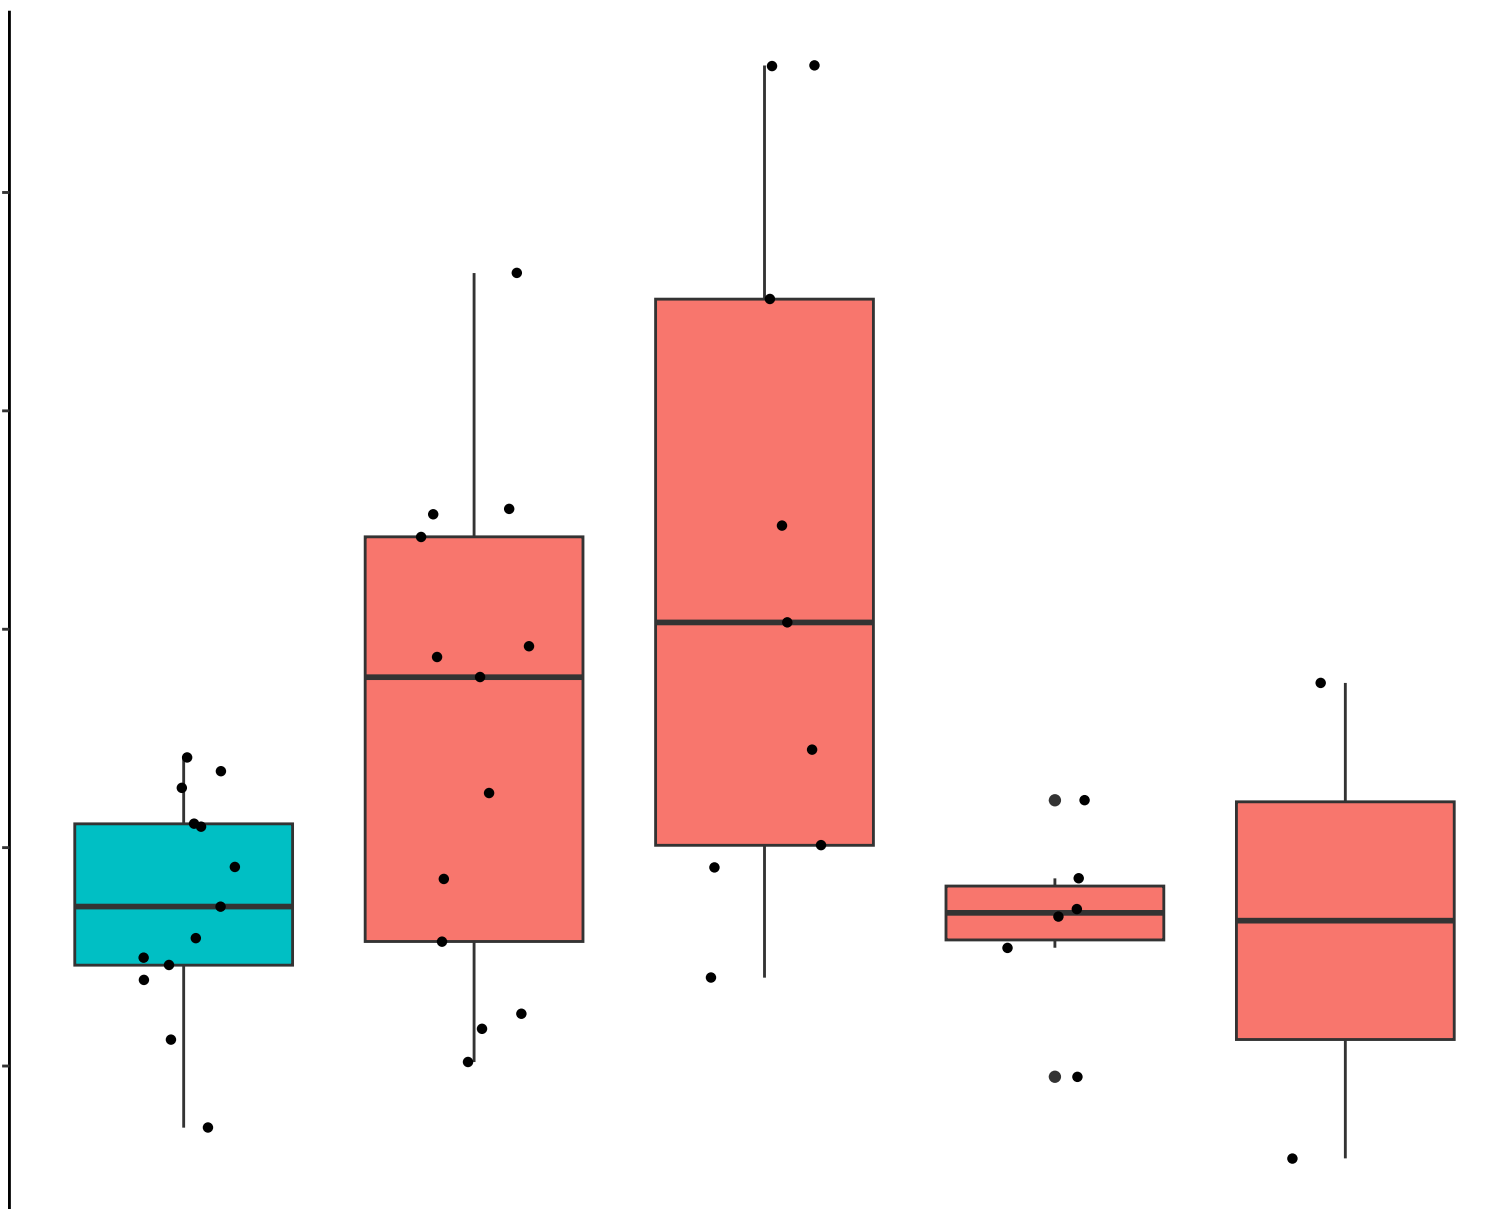

GSE48634

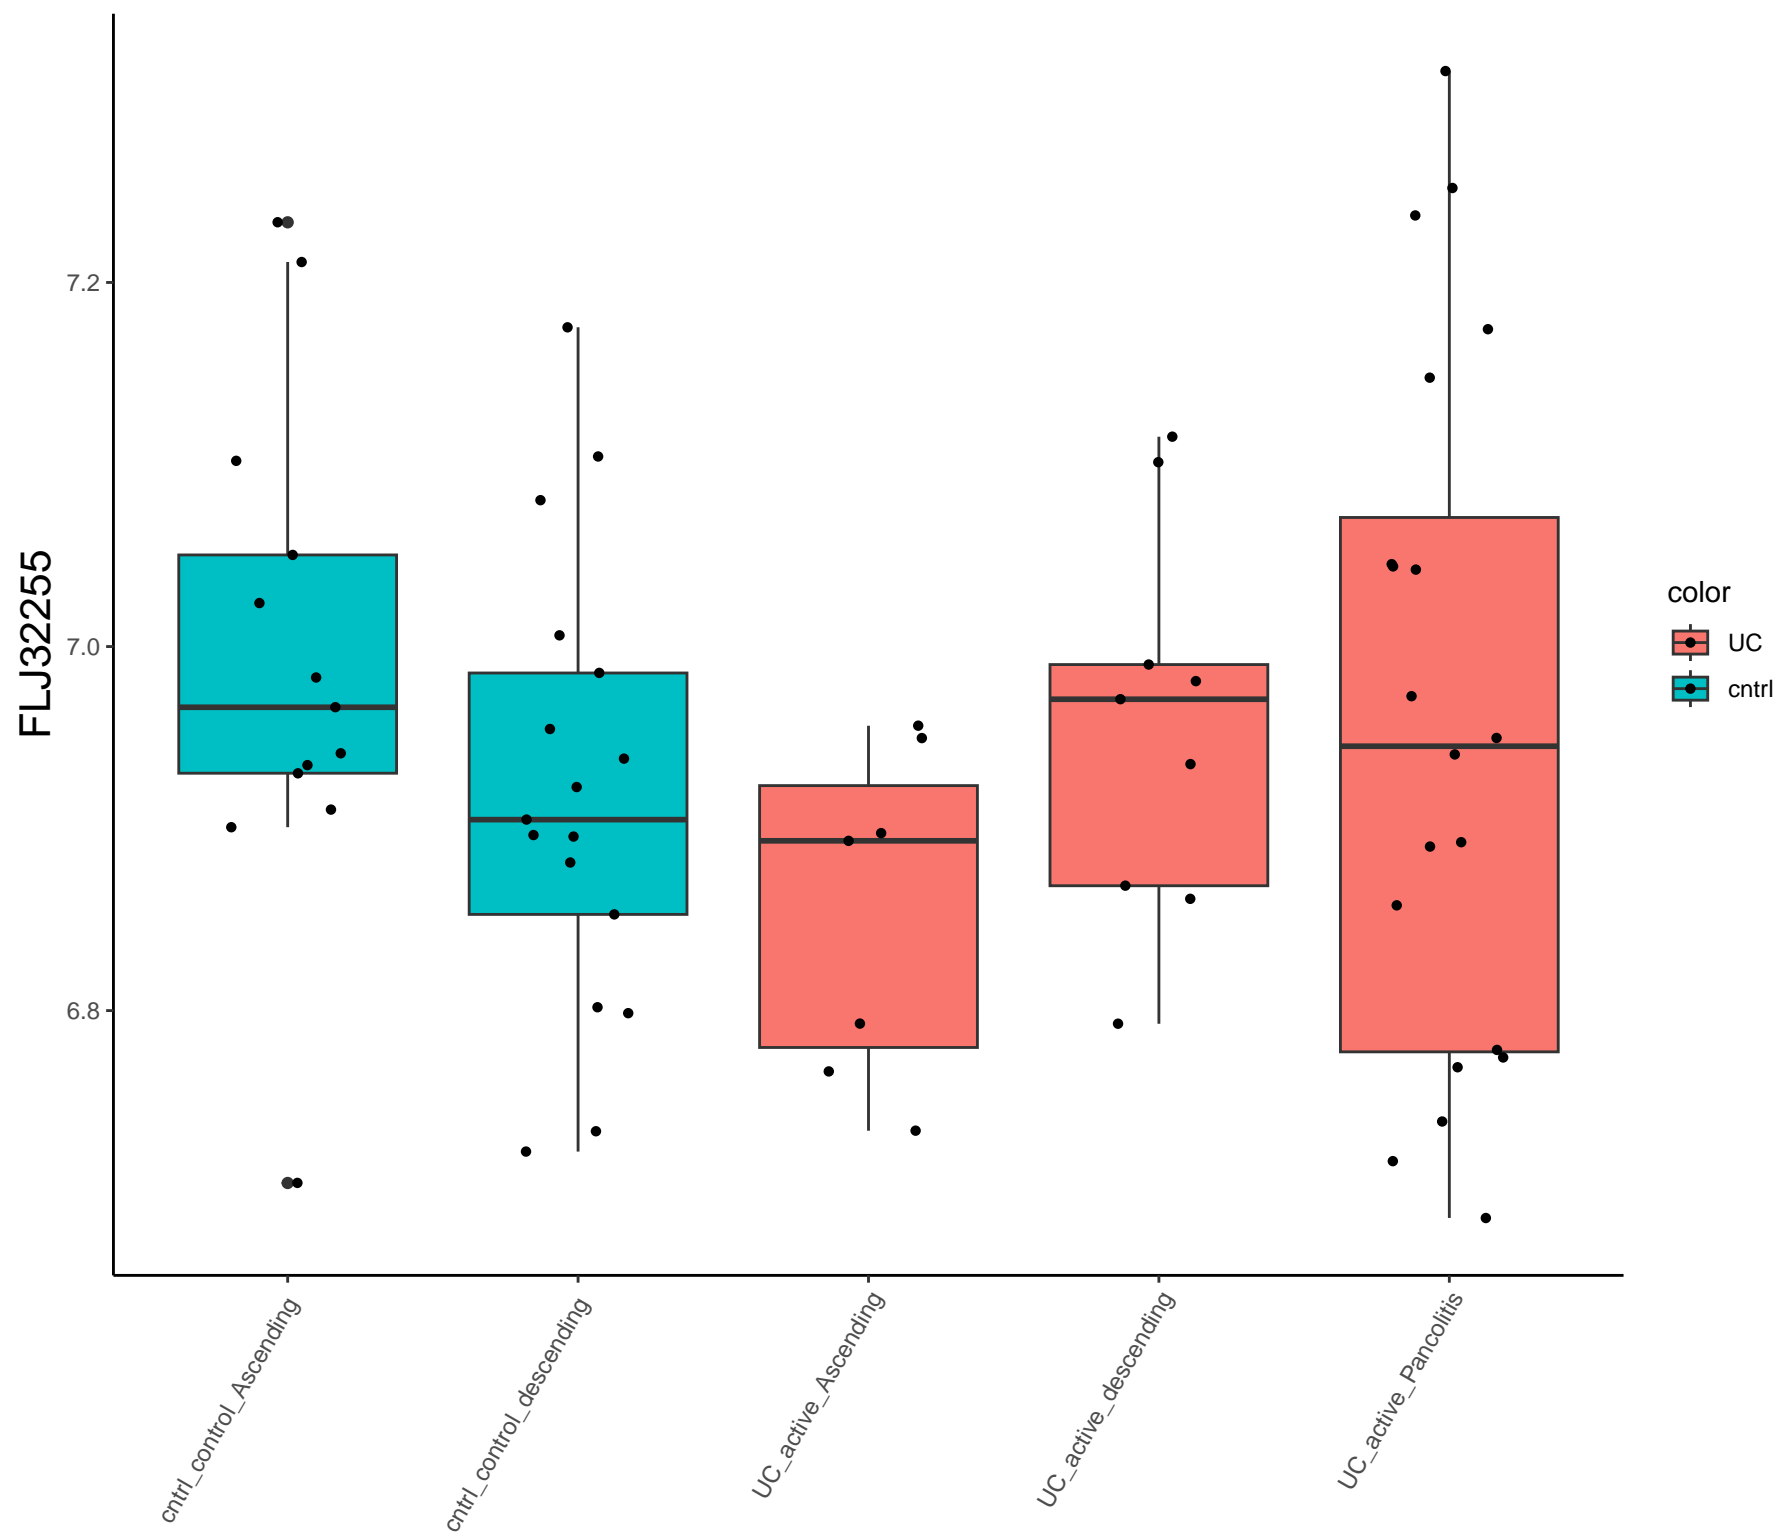

GSE9452

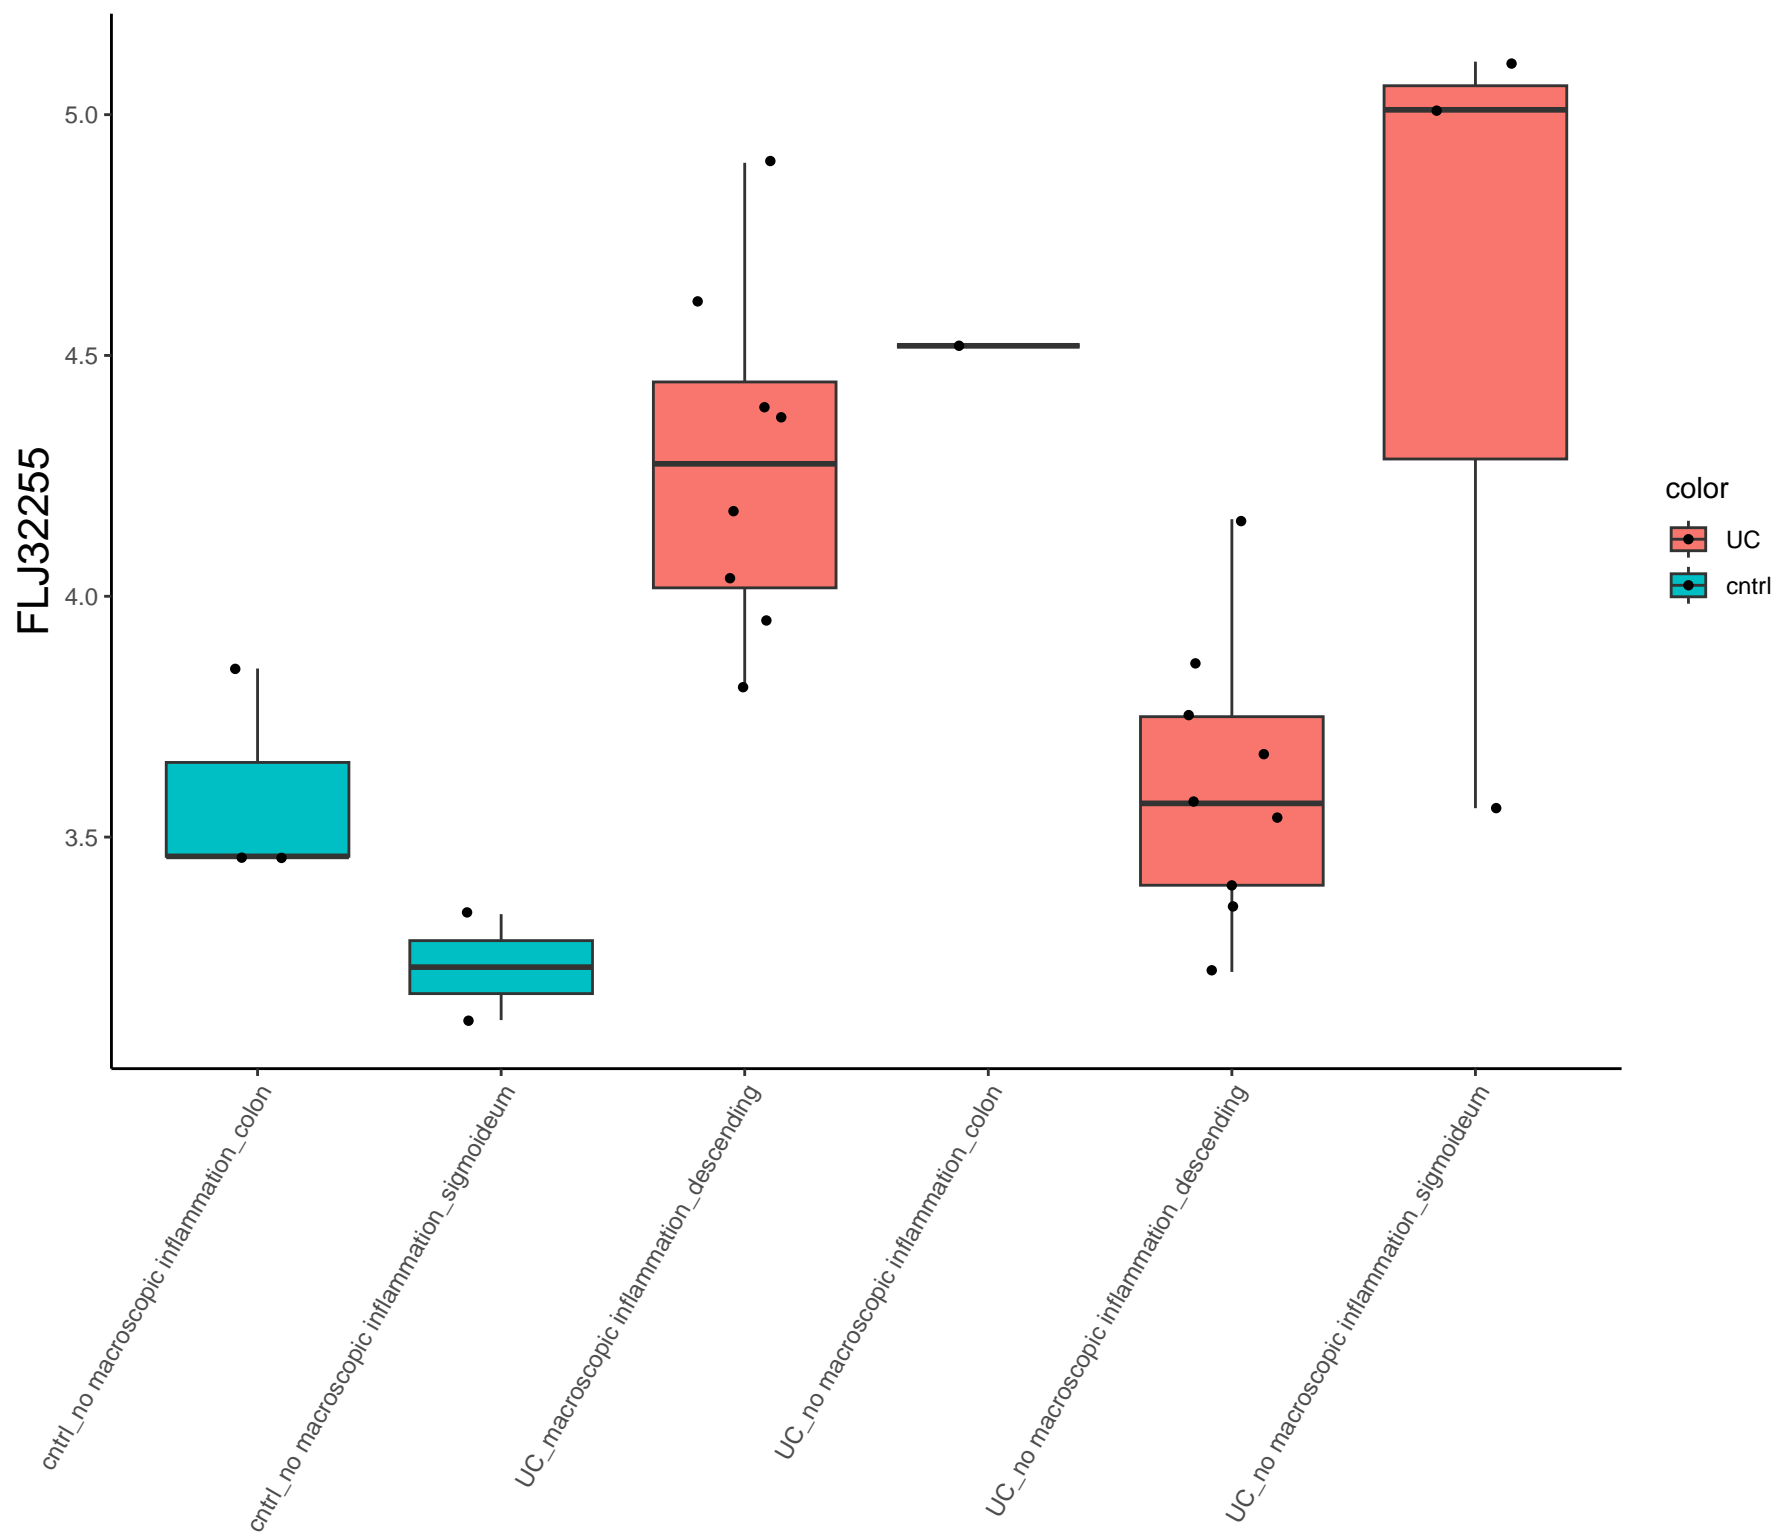

GSE128682

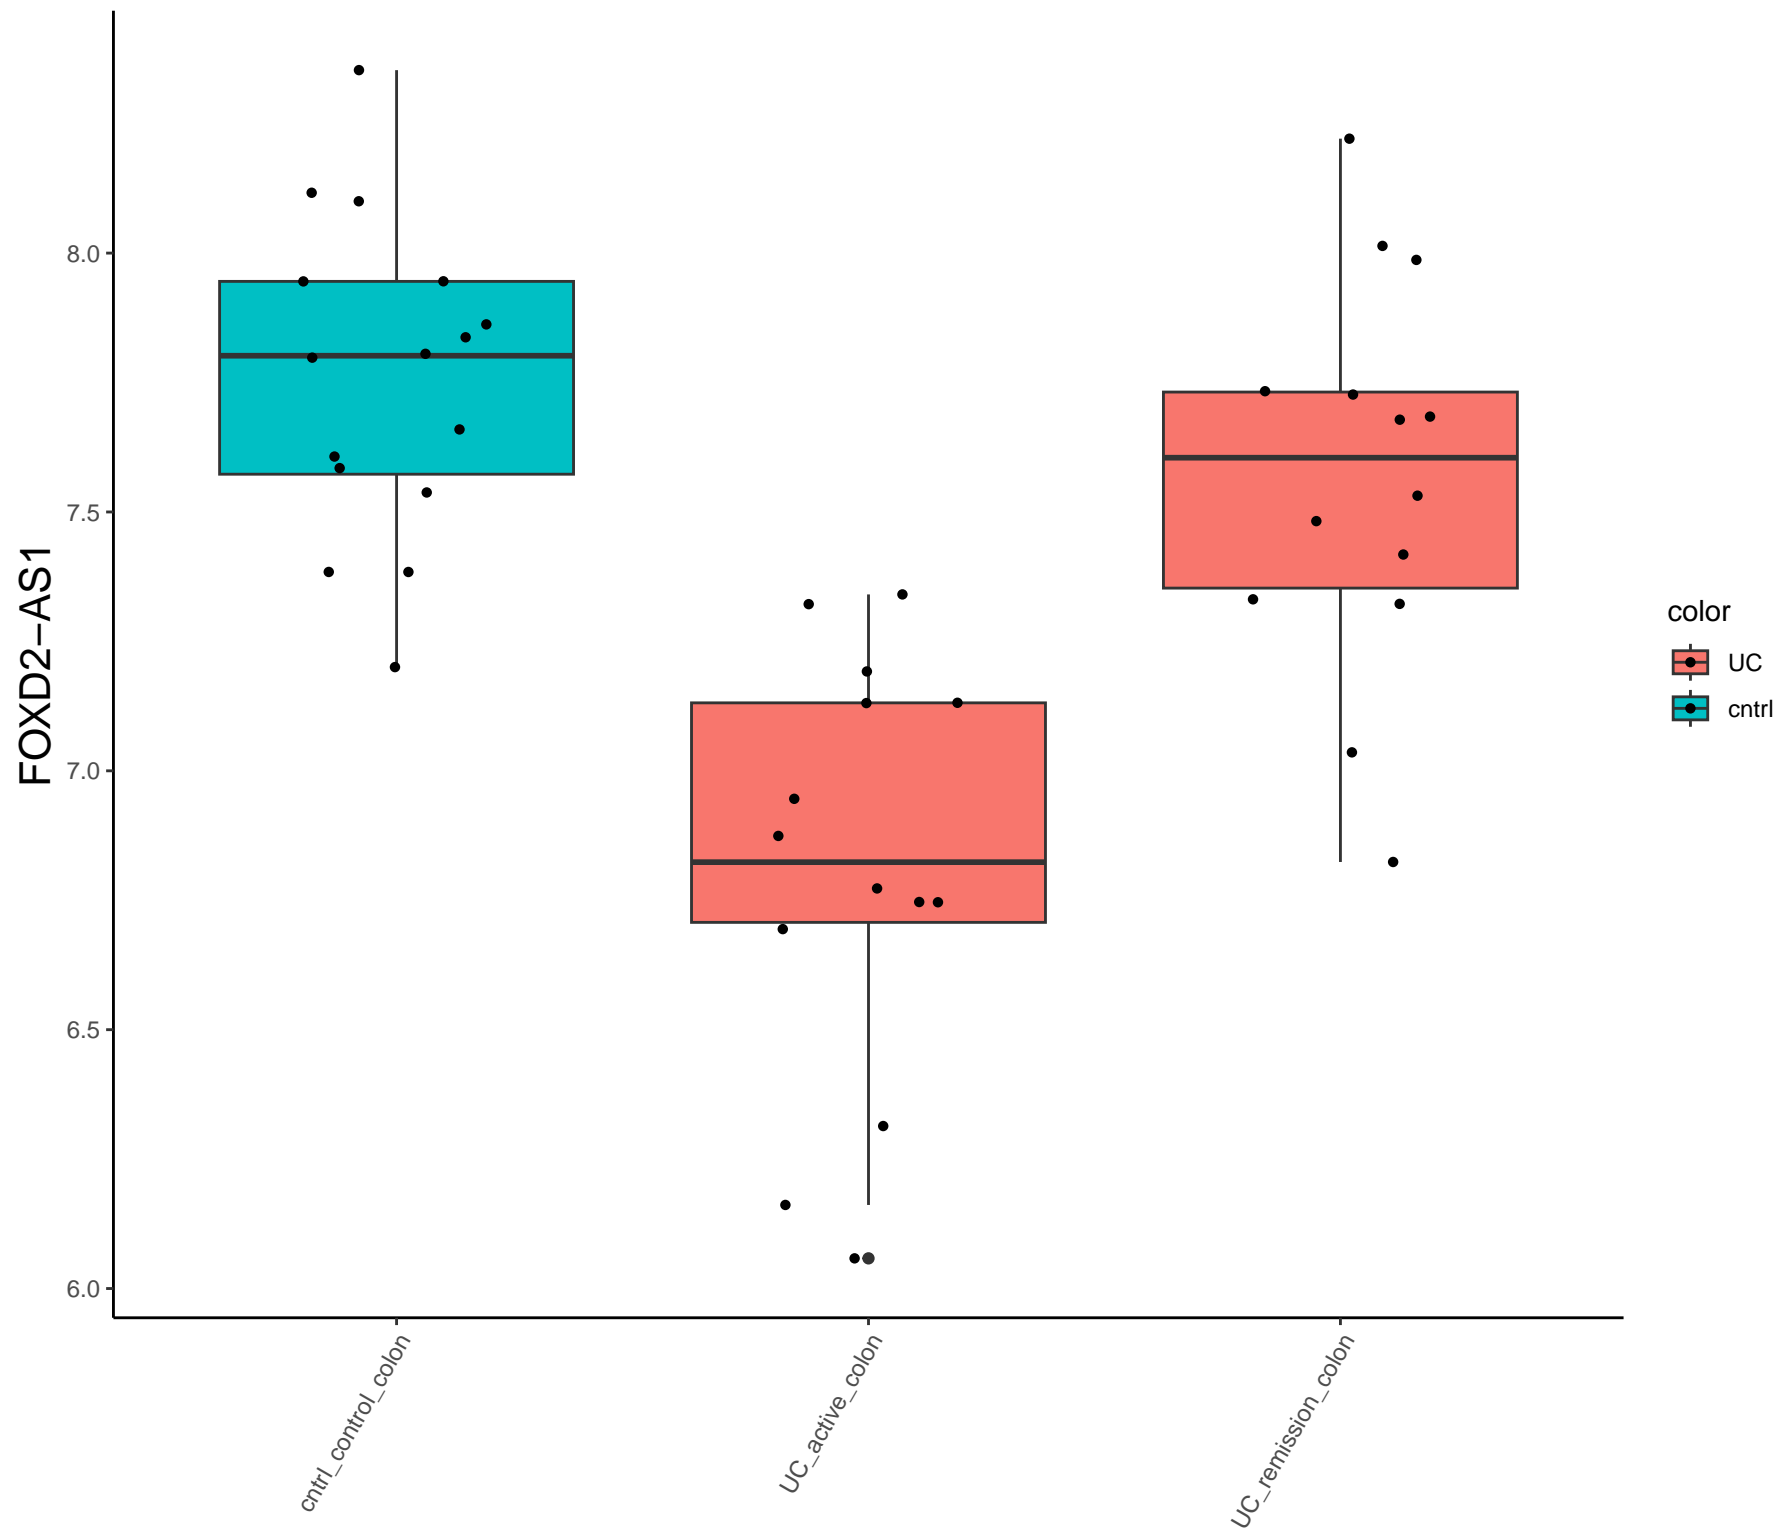

GSE38713

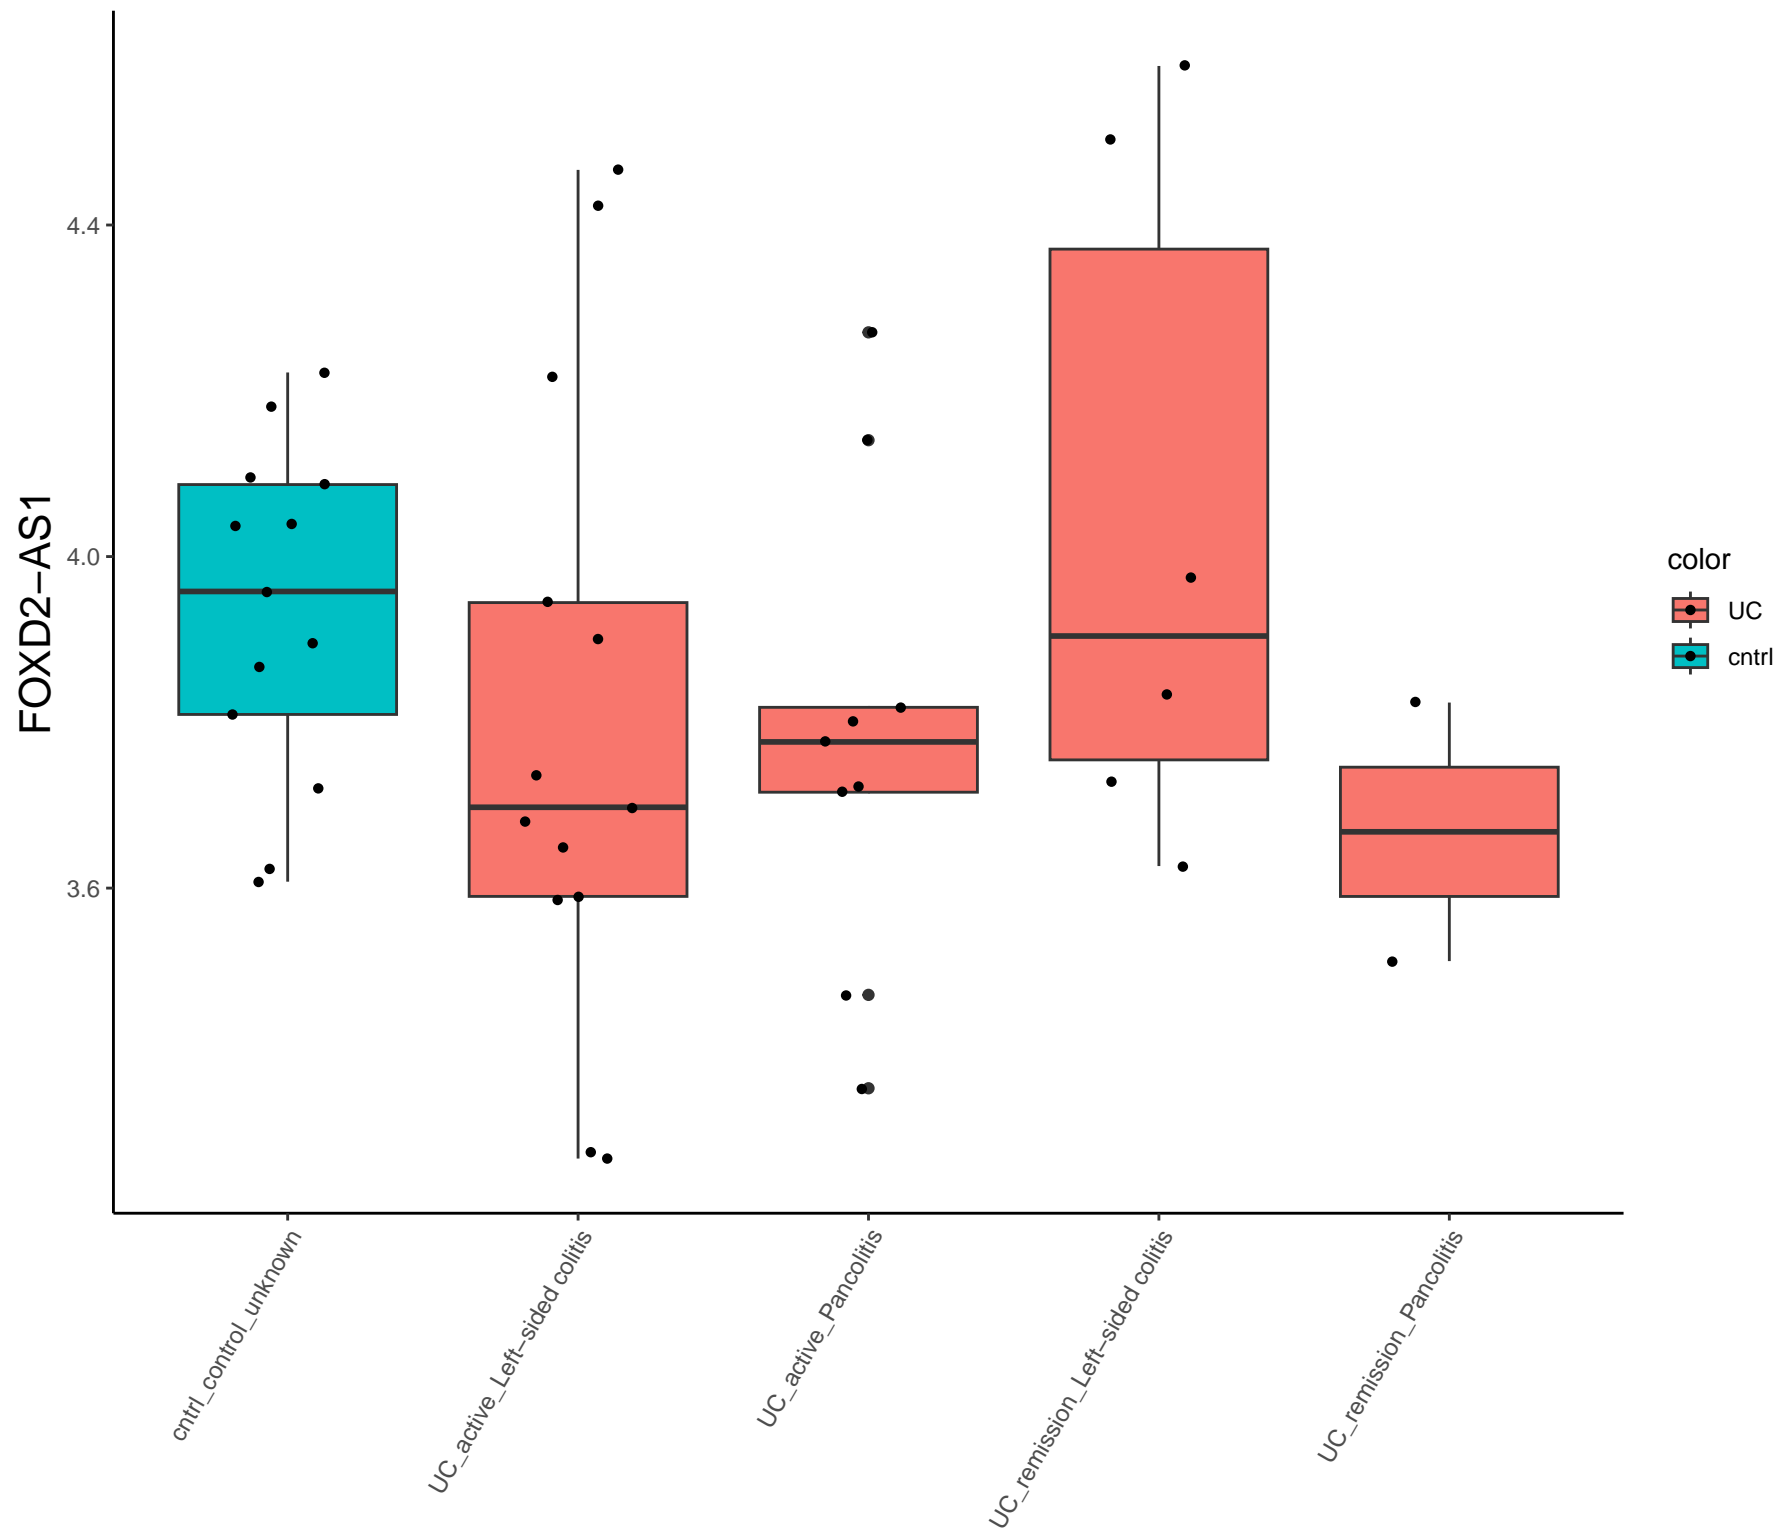

GSE48634

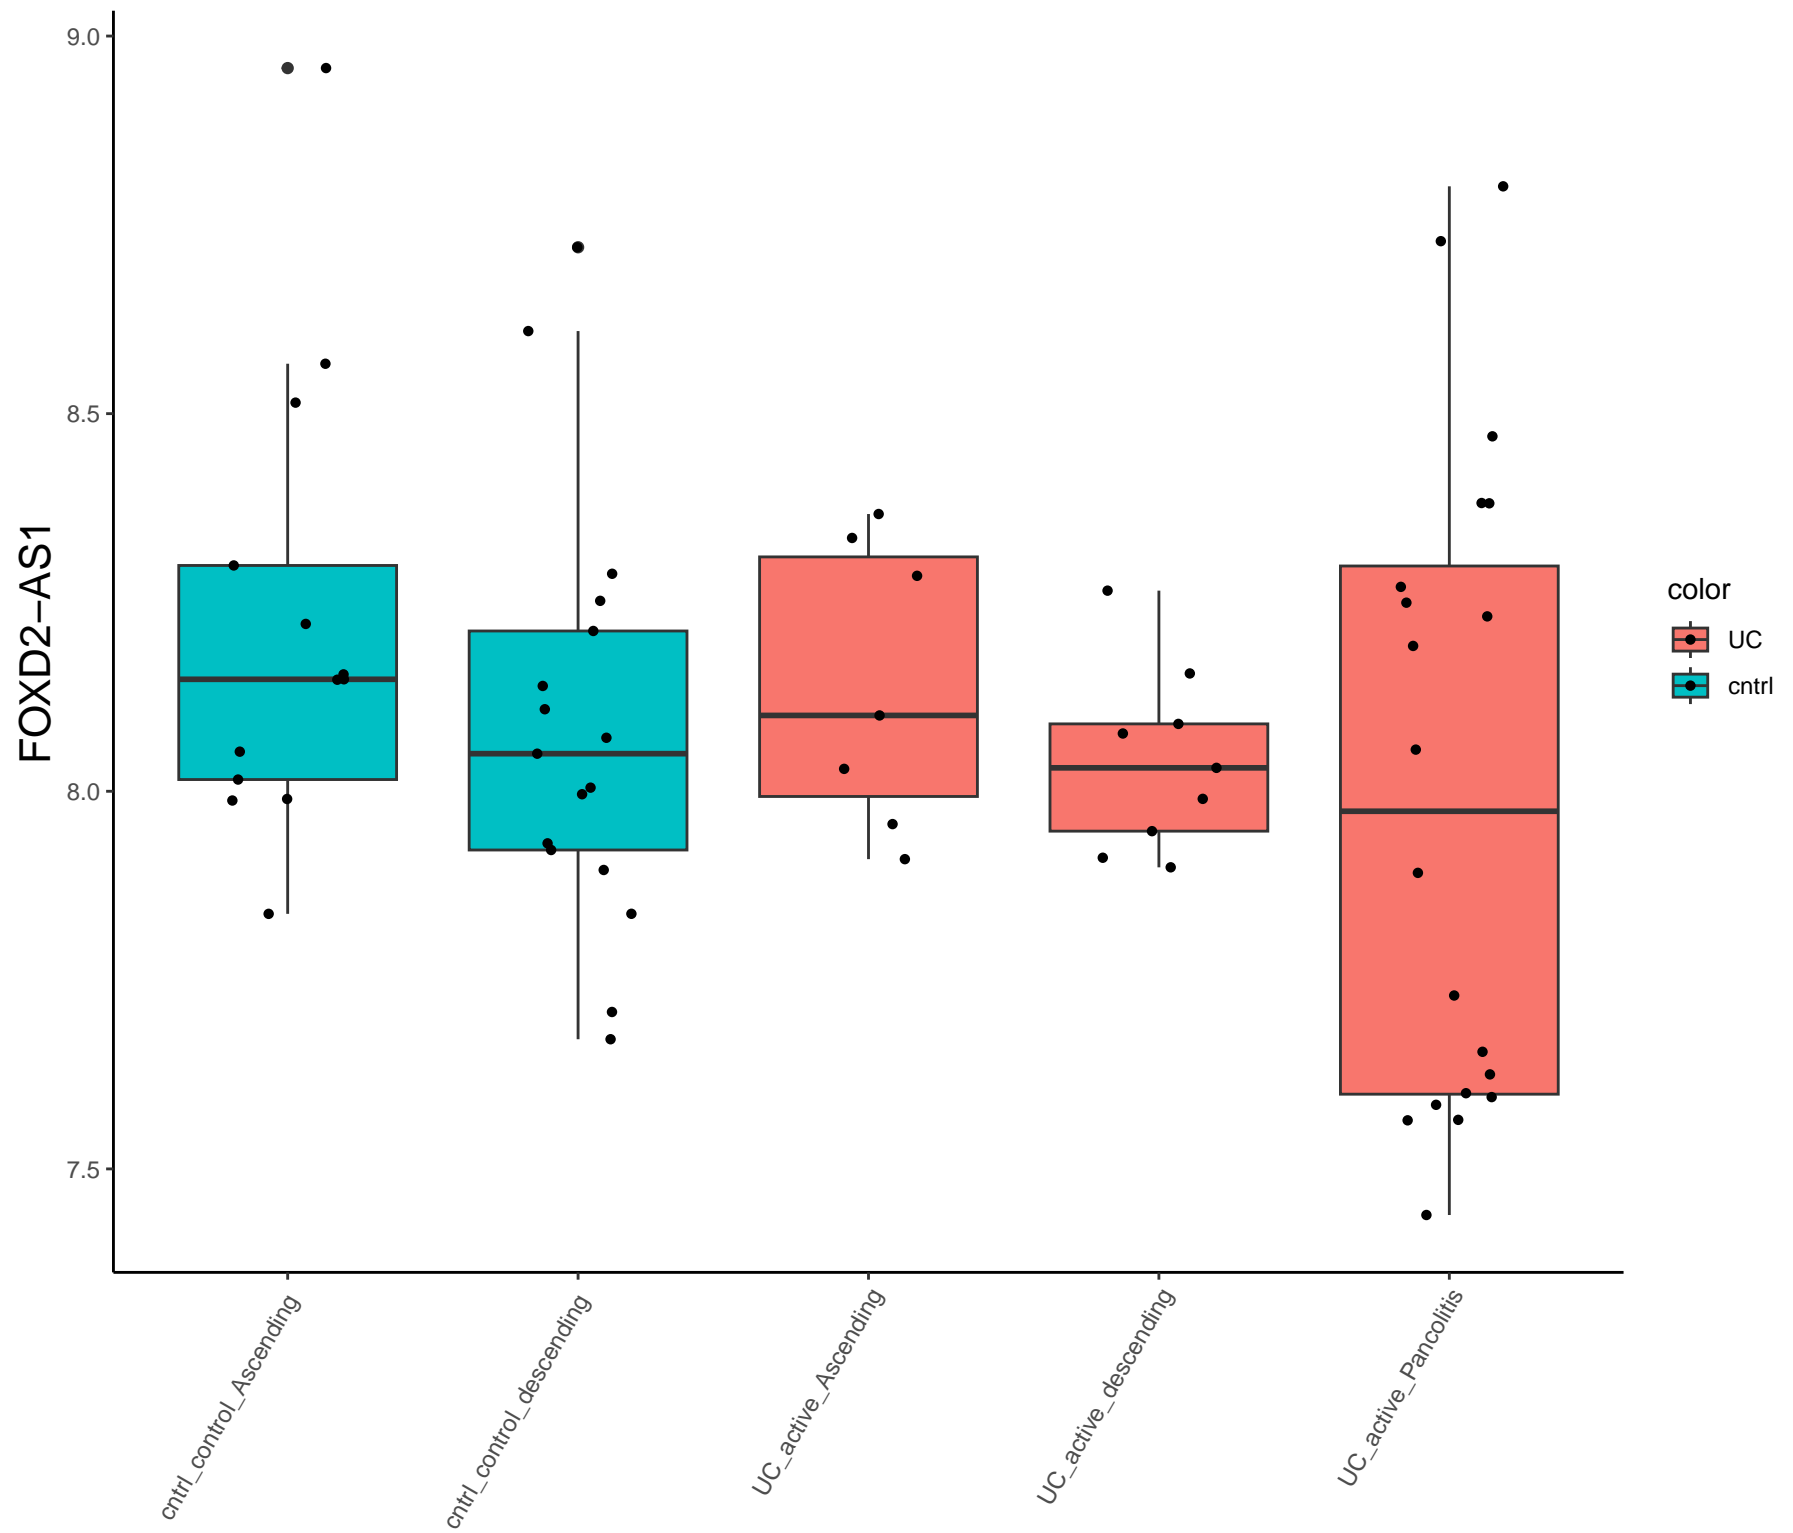

GSE9452

FOXD2-AS1

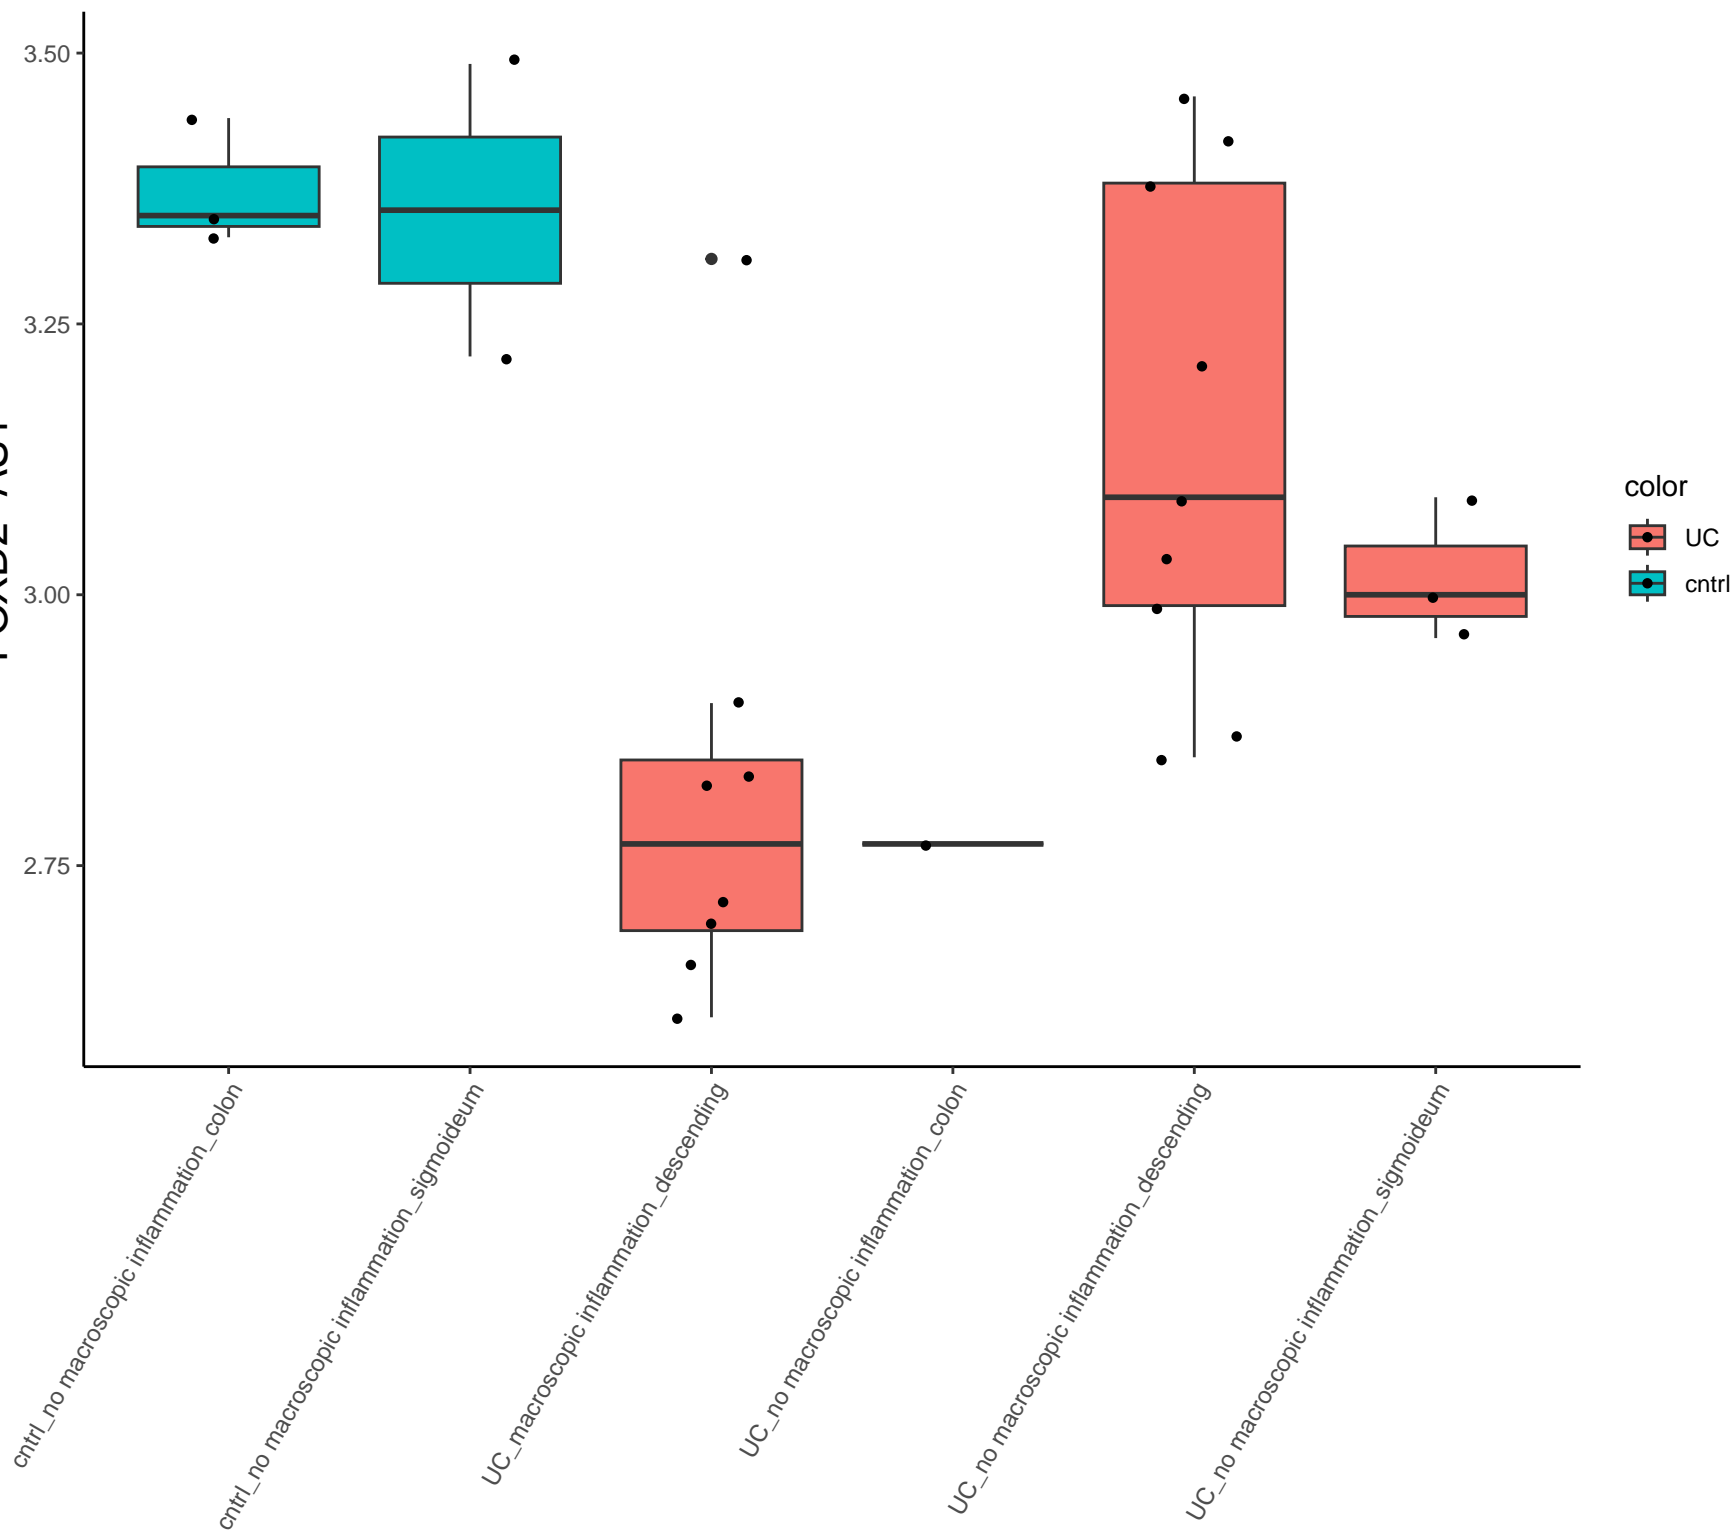



GSE128682

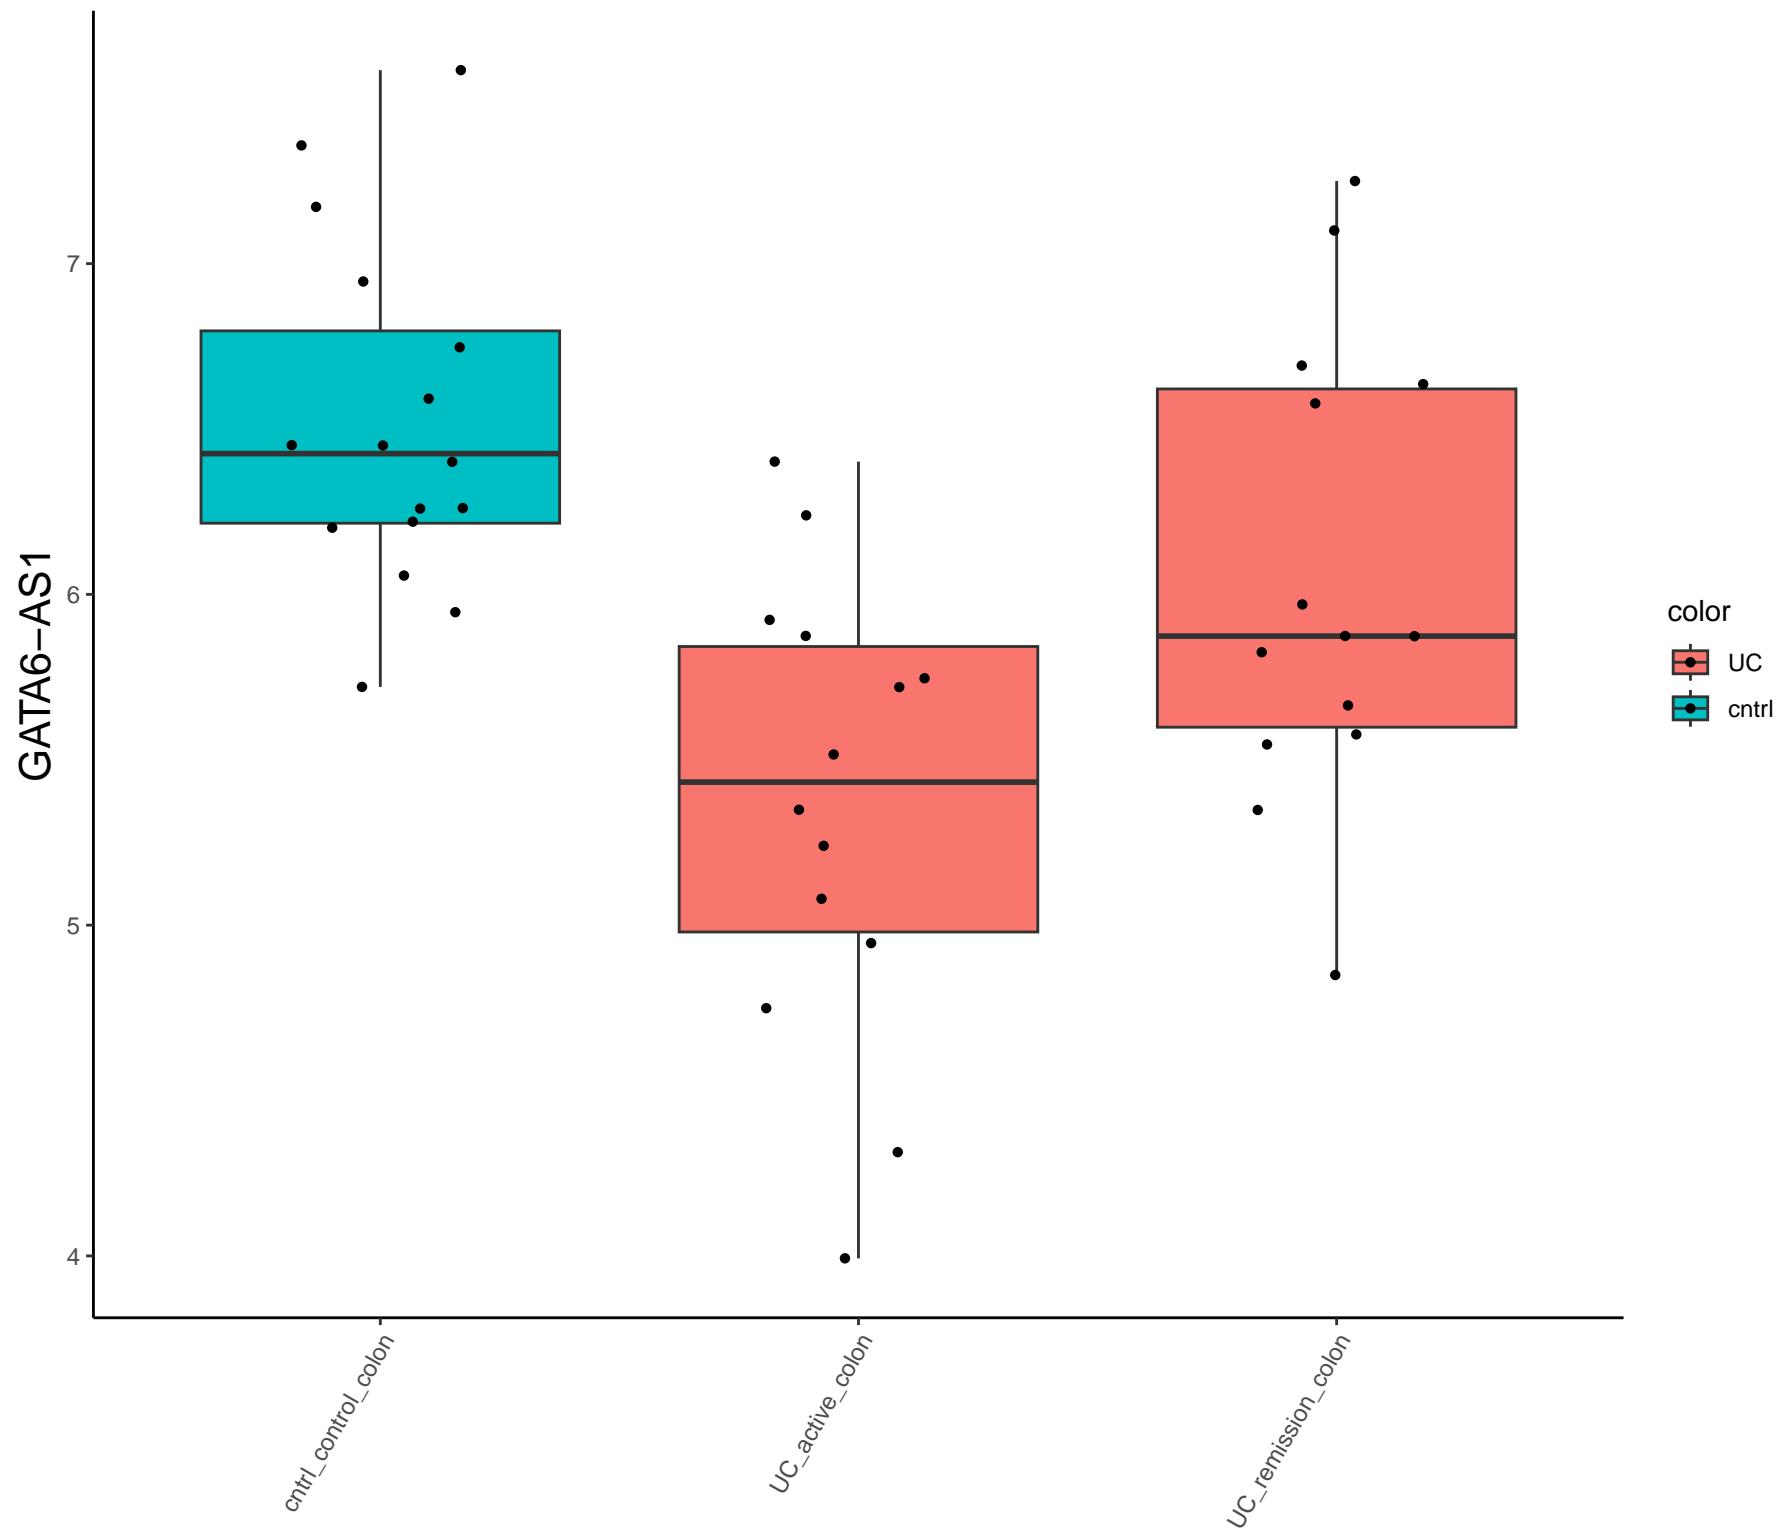

GSE38713

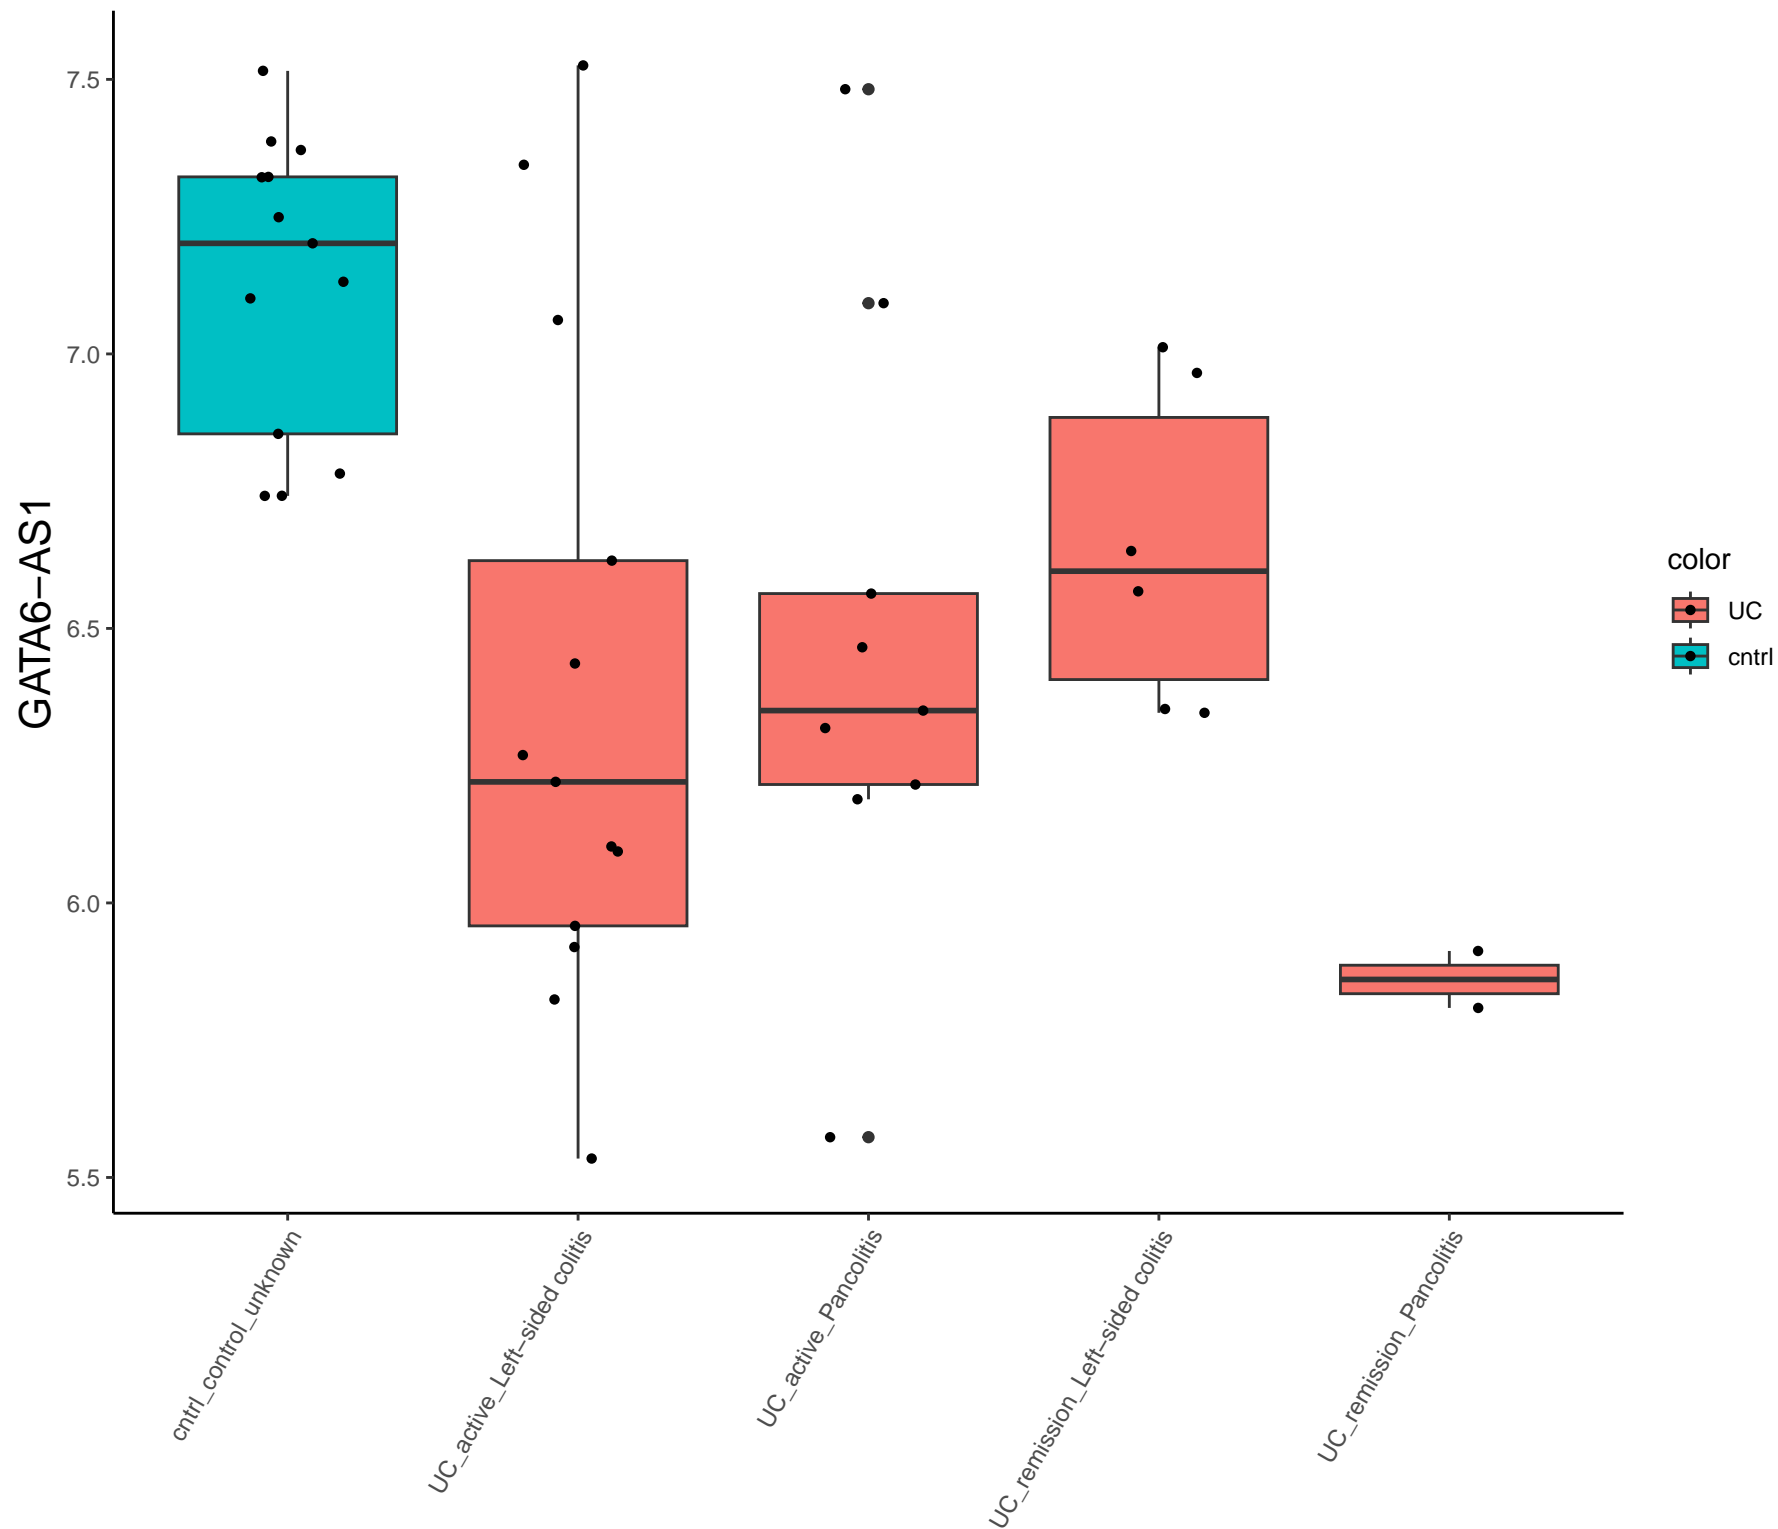

GSE48634

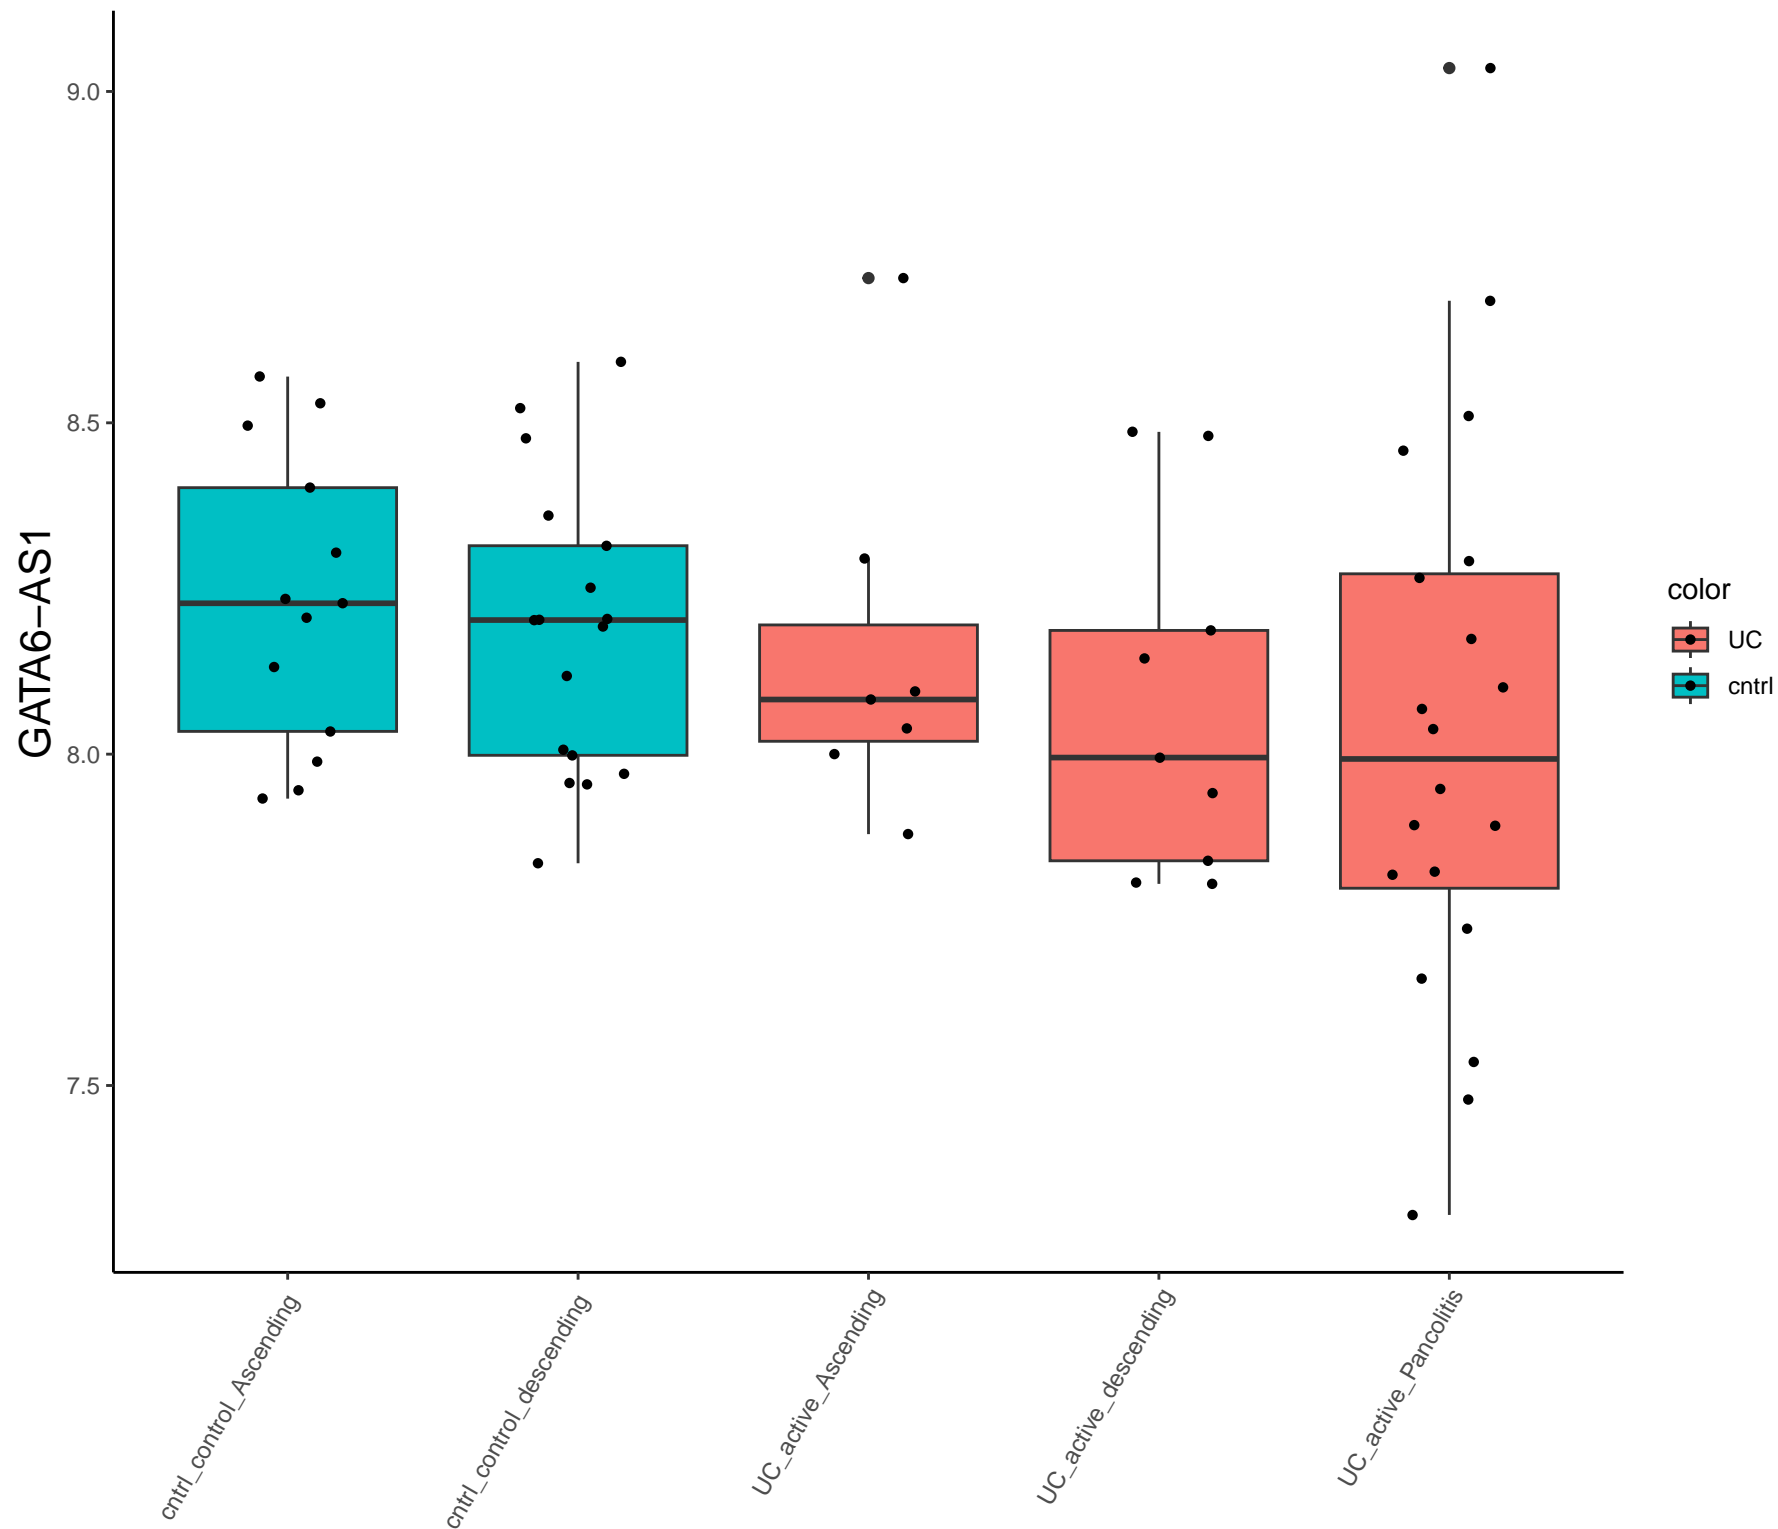

GSE9452

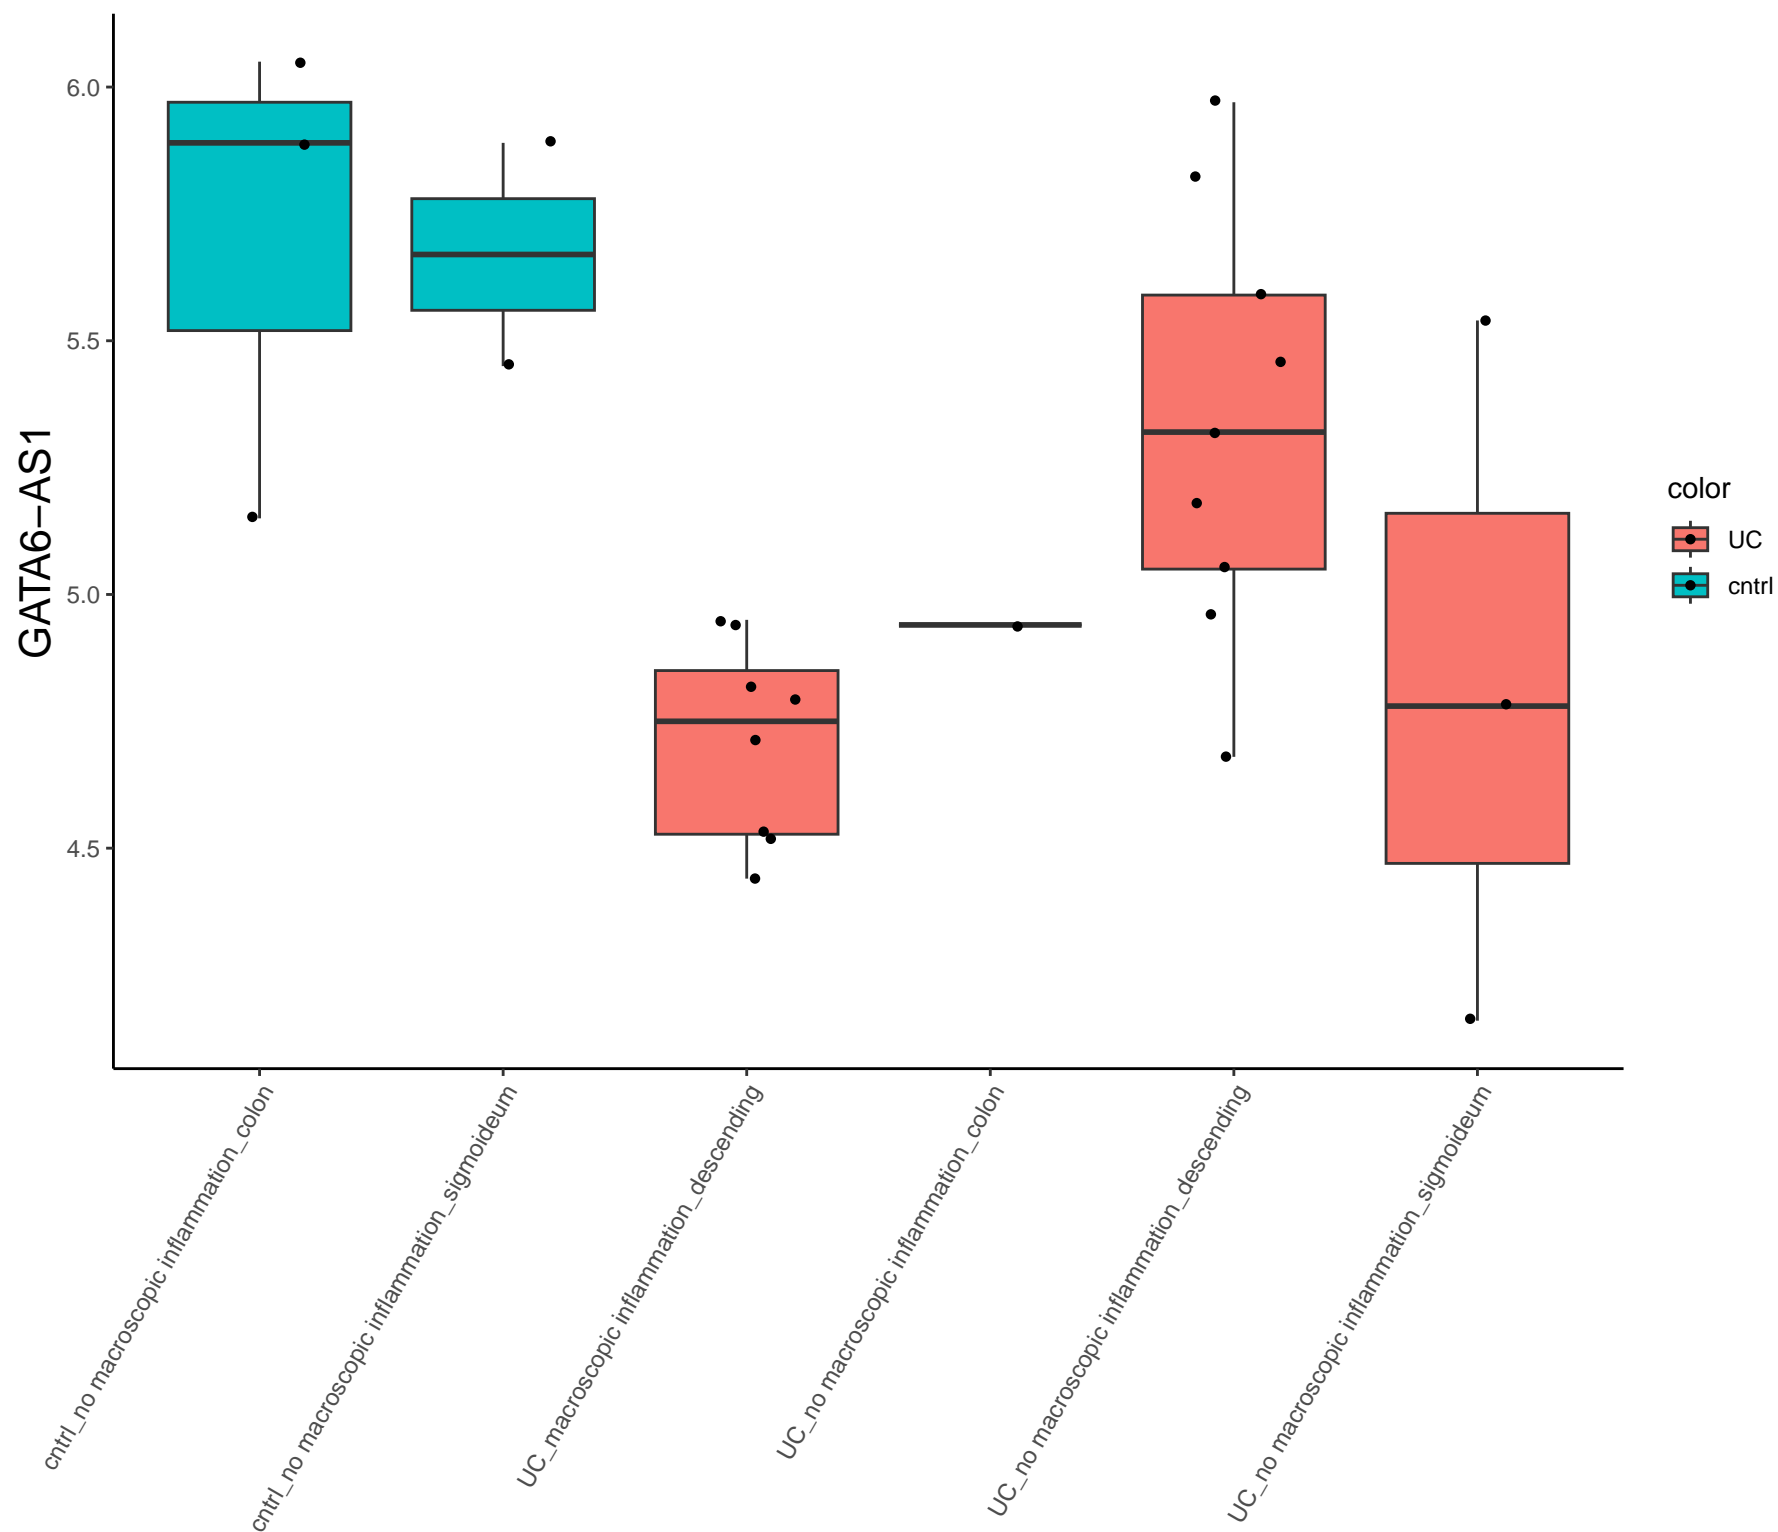

GSE128682

LINC01215

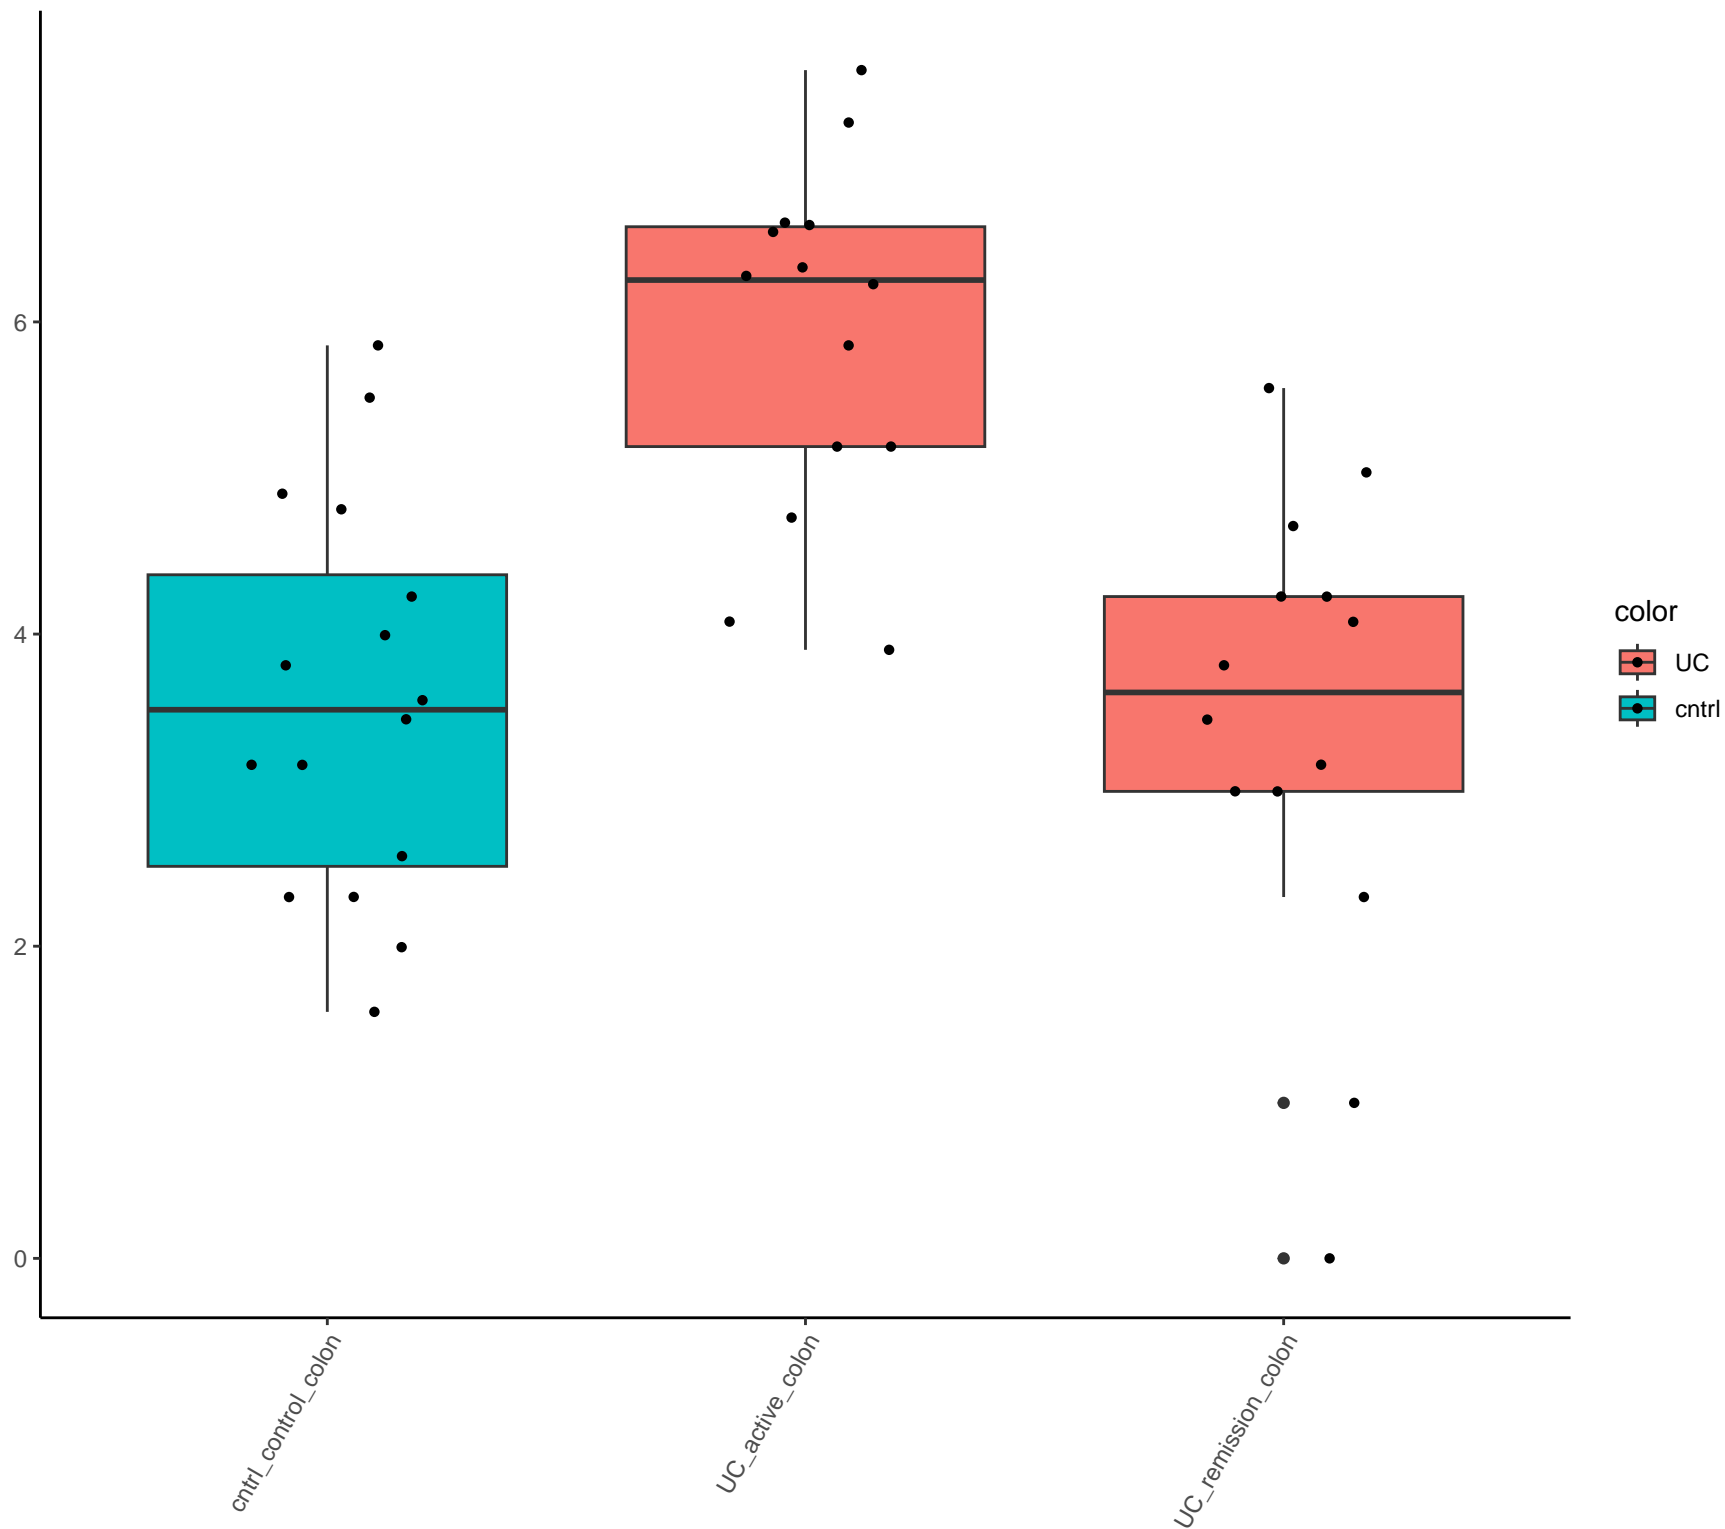

GSE38713

LINC01215

color

UC  
cntrl

cntrl\_control\_unknown

UC\_active\_Left-sided colitis

UC\_active\_Pancolitis

UC\_remission\_Left-sided colitis

UC\_remission\_Pancolitis

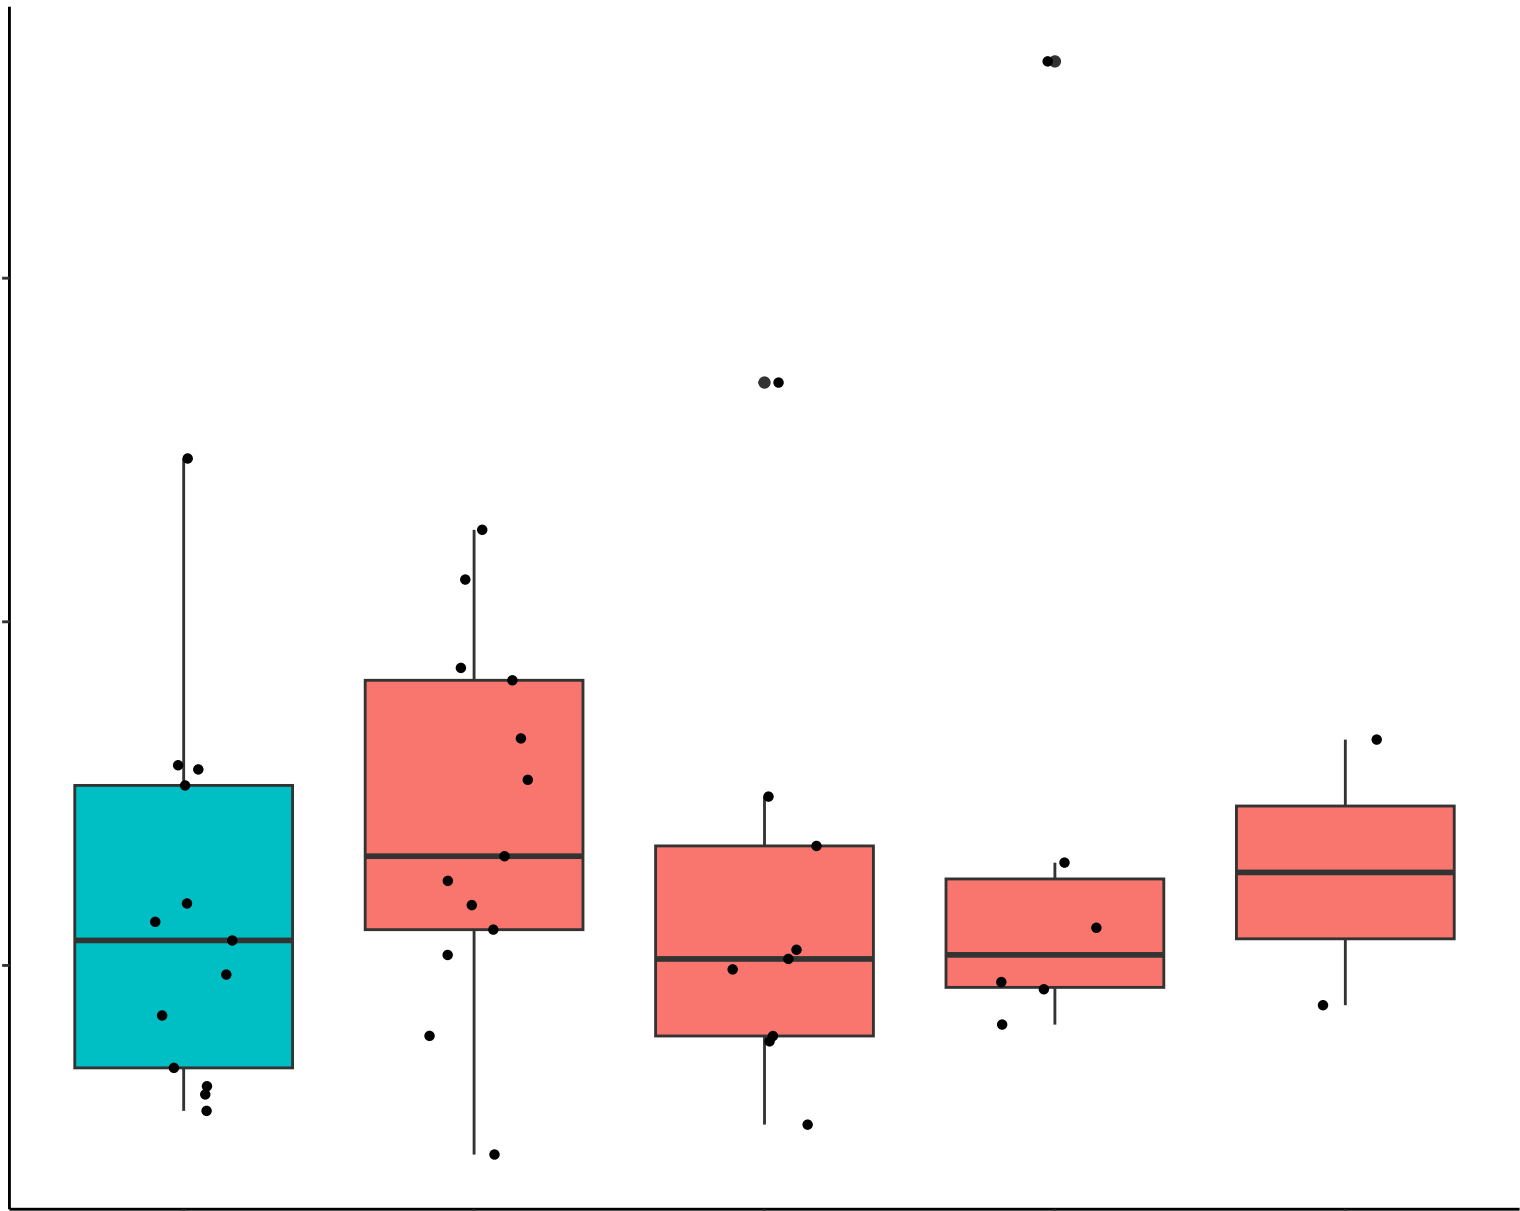

GSE9452

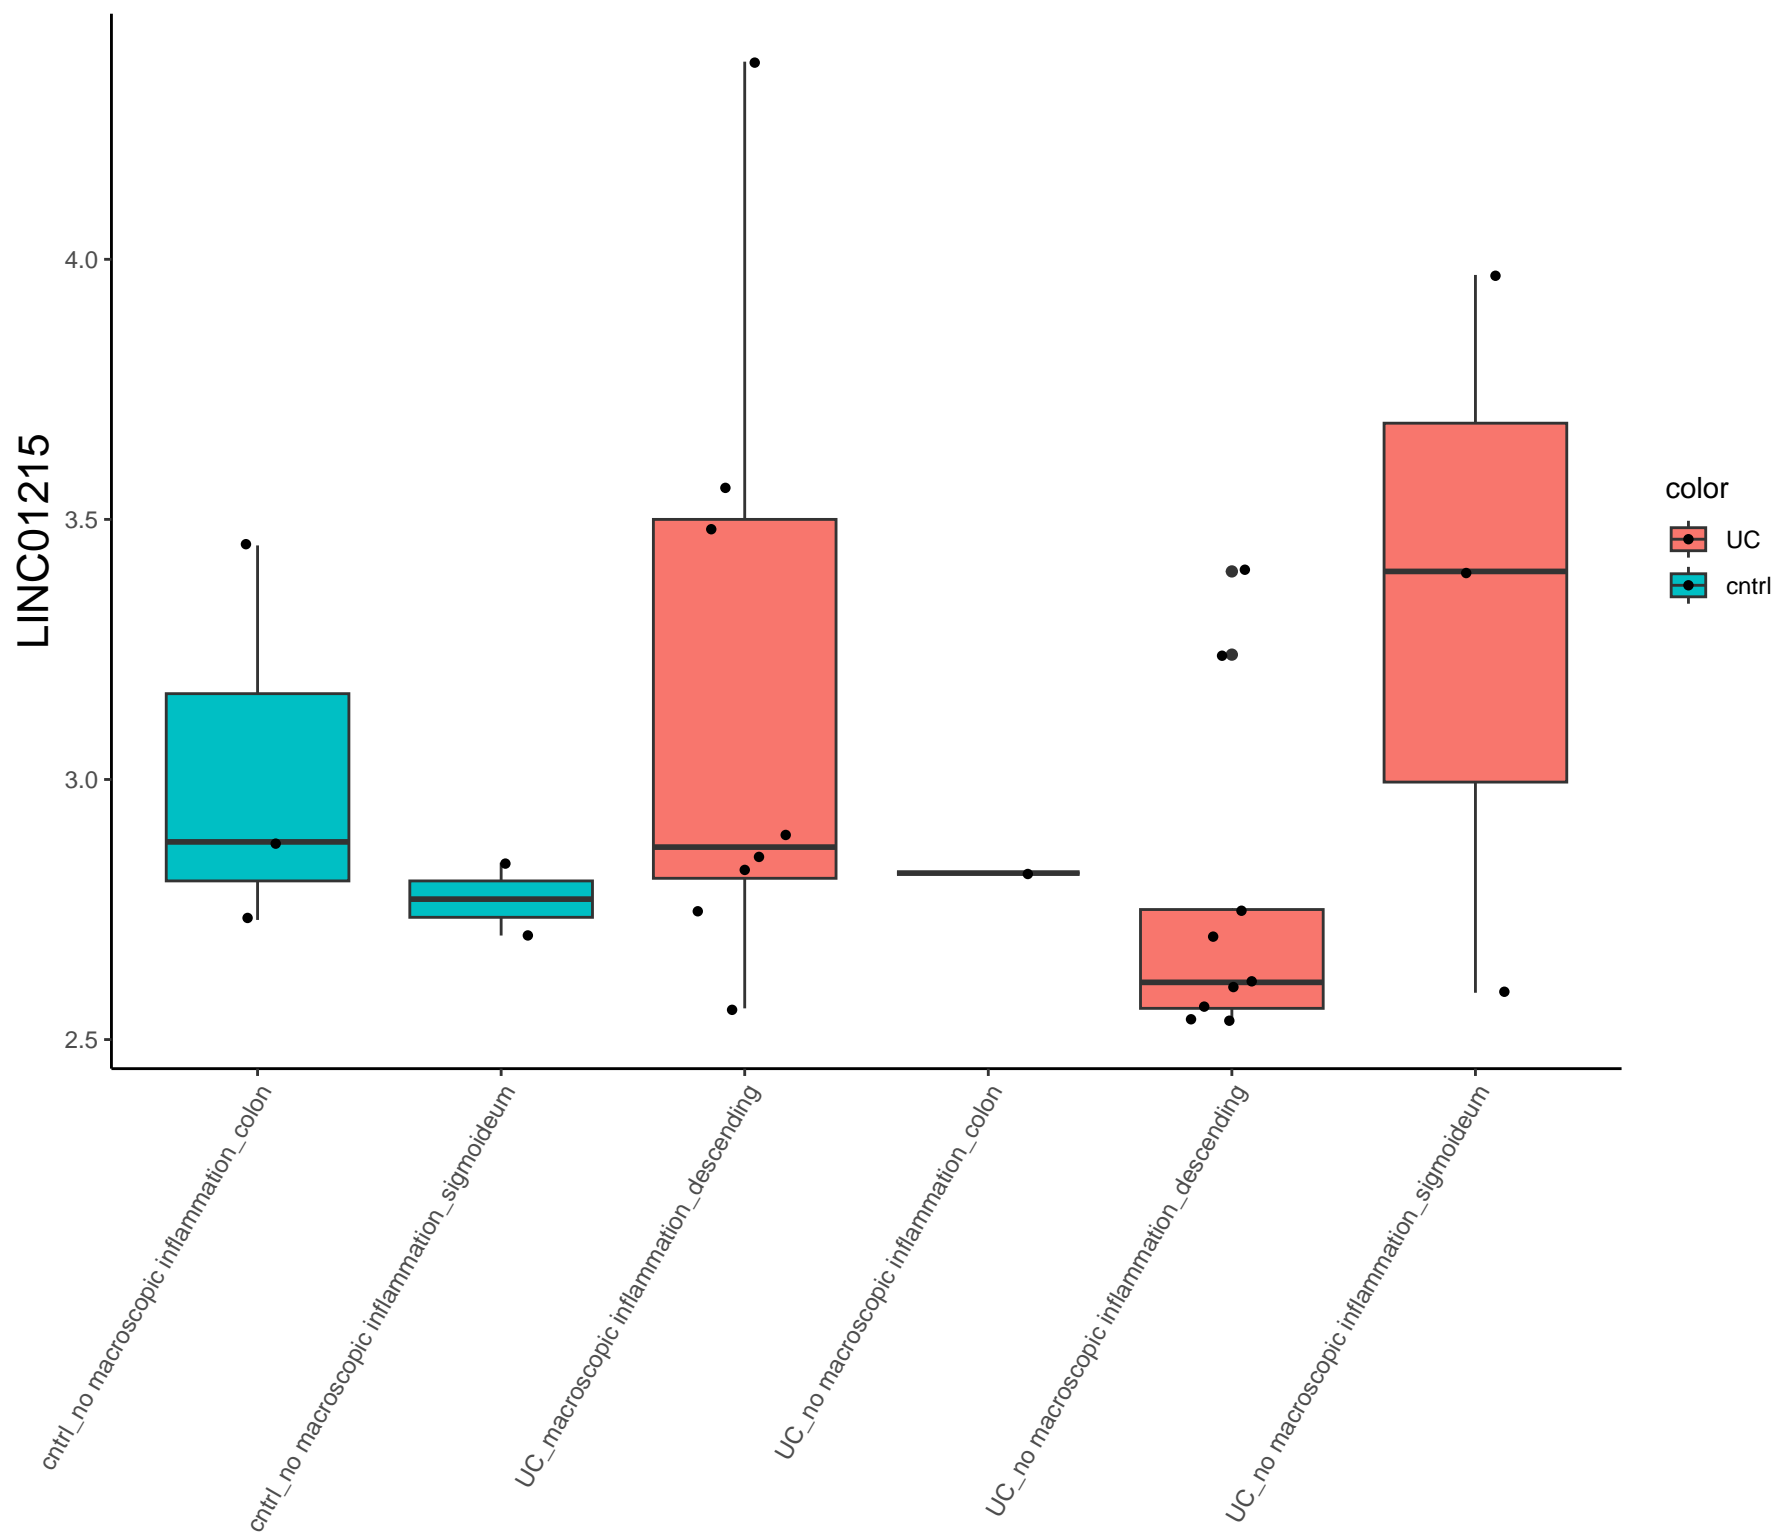

GSE128682

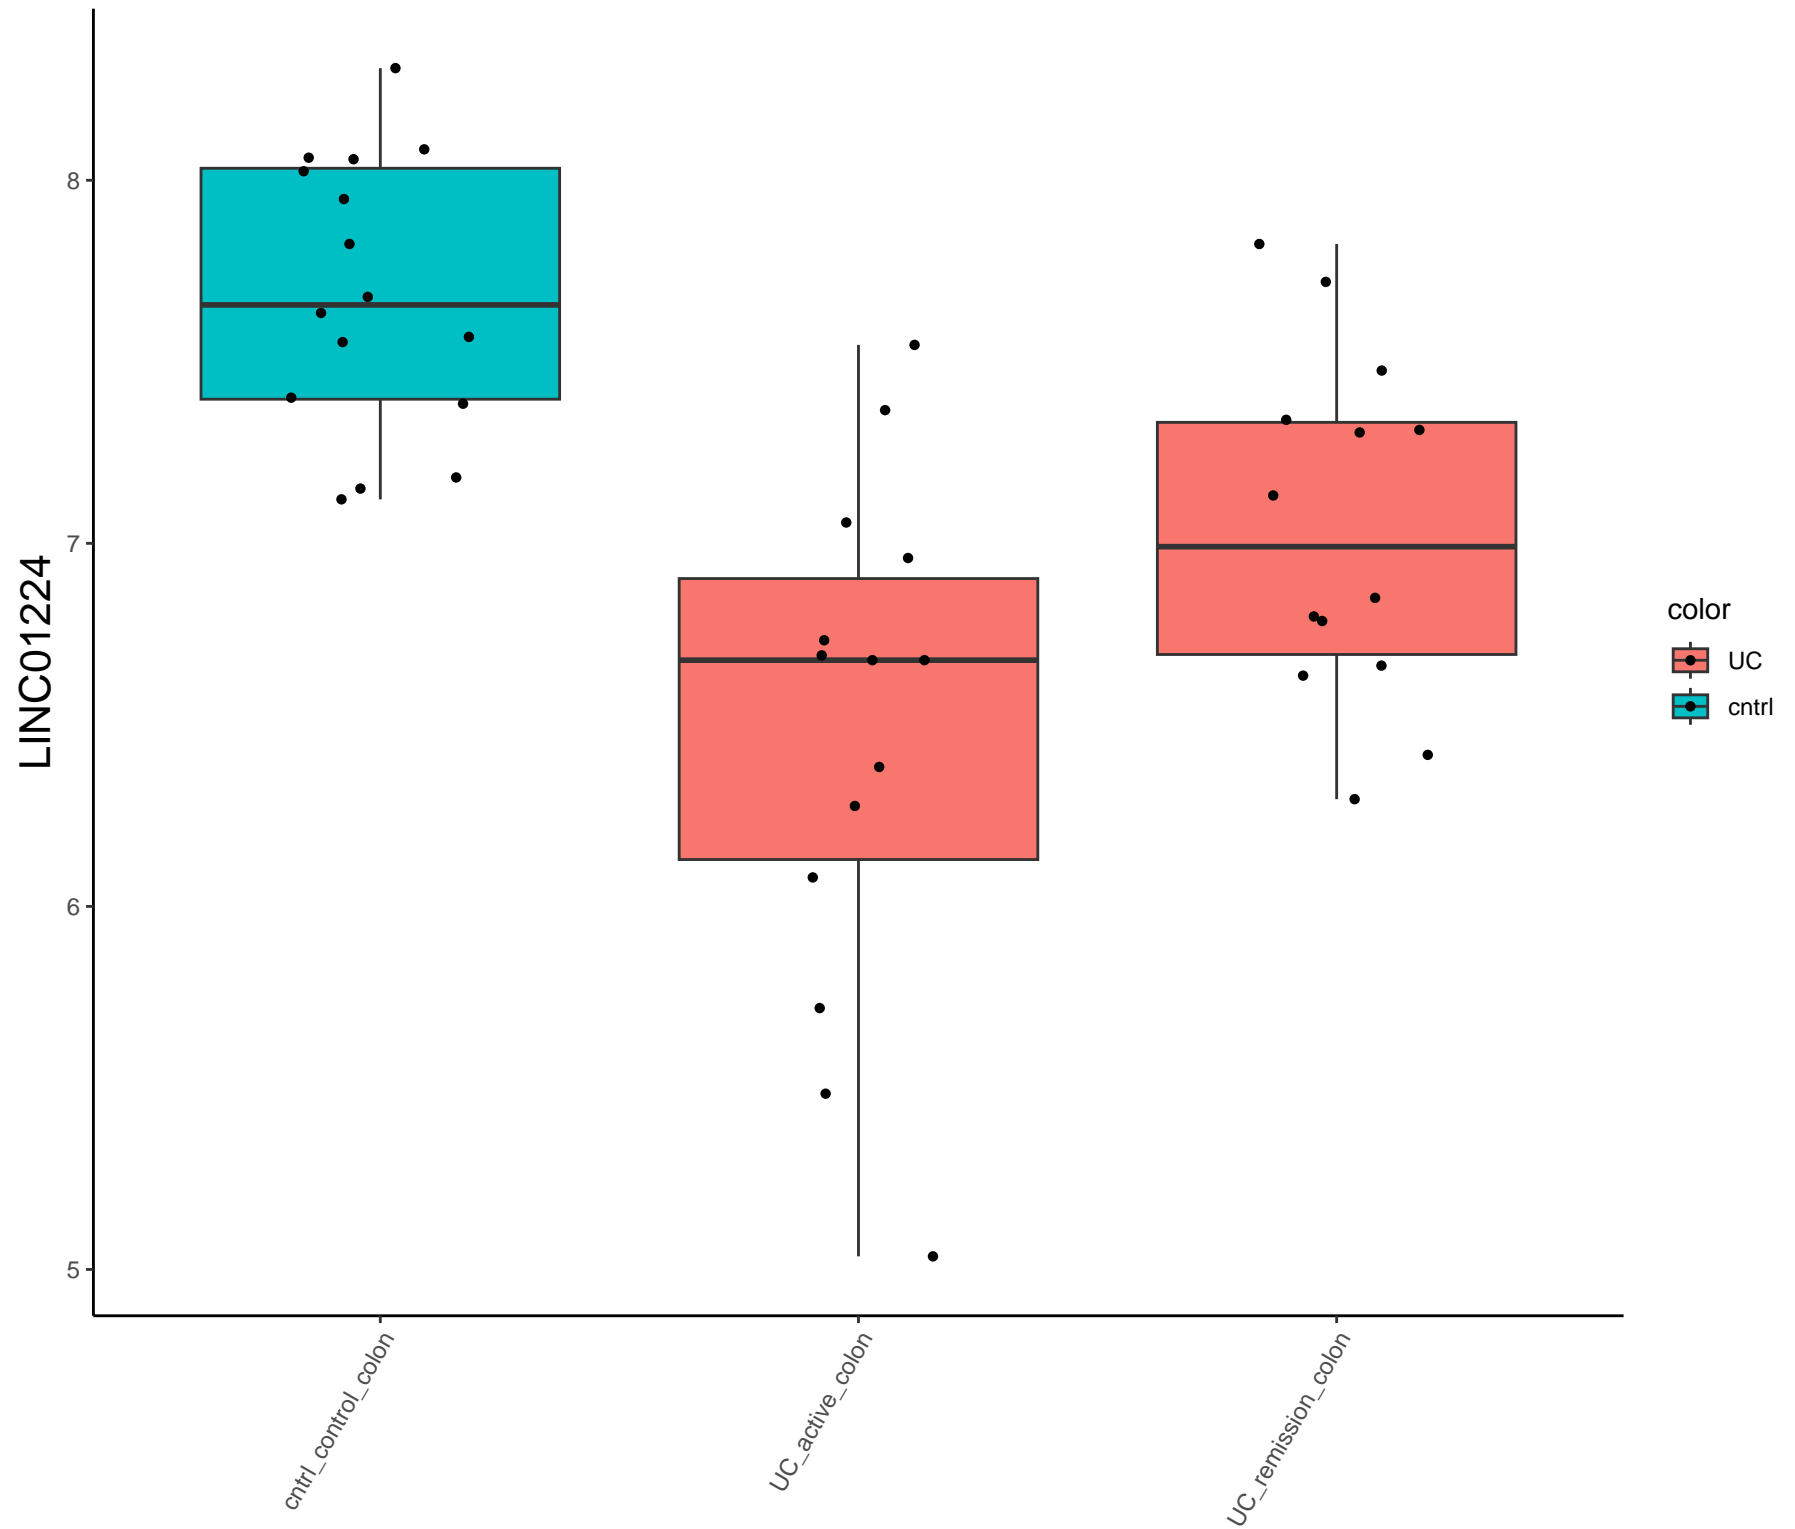



GSE38713

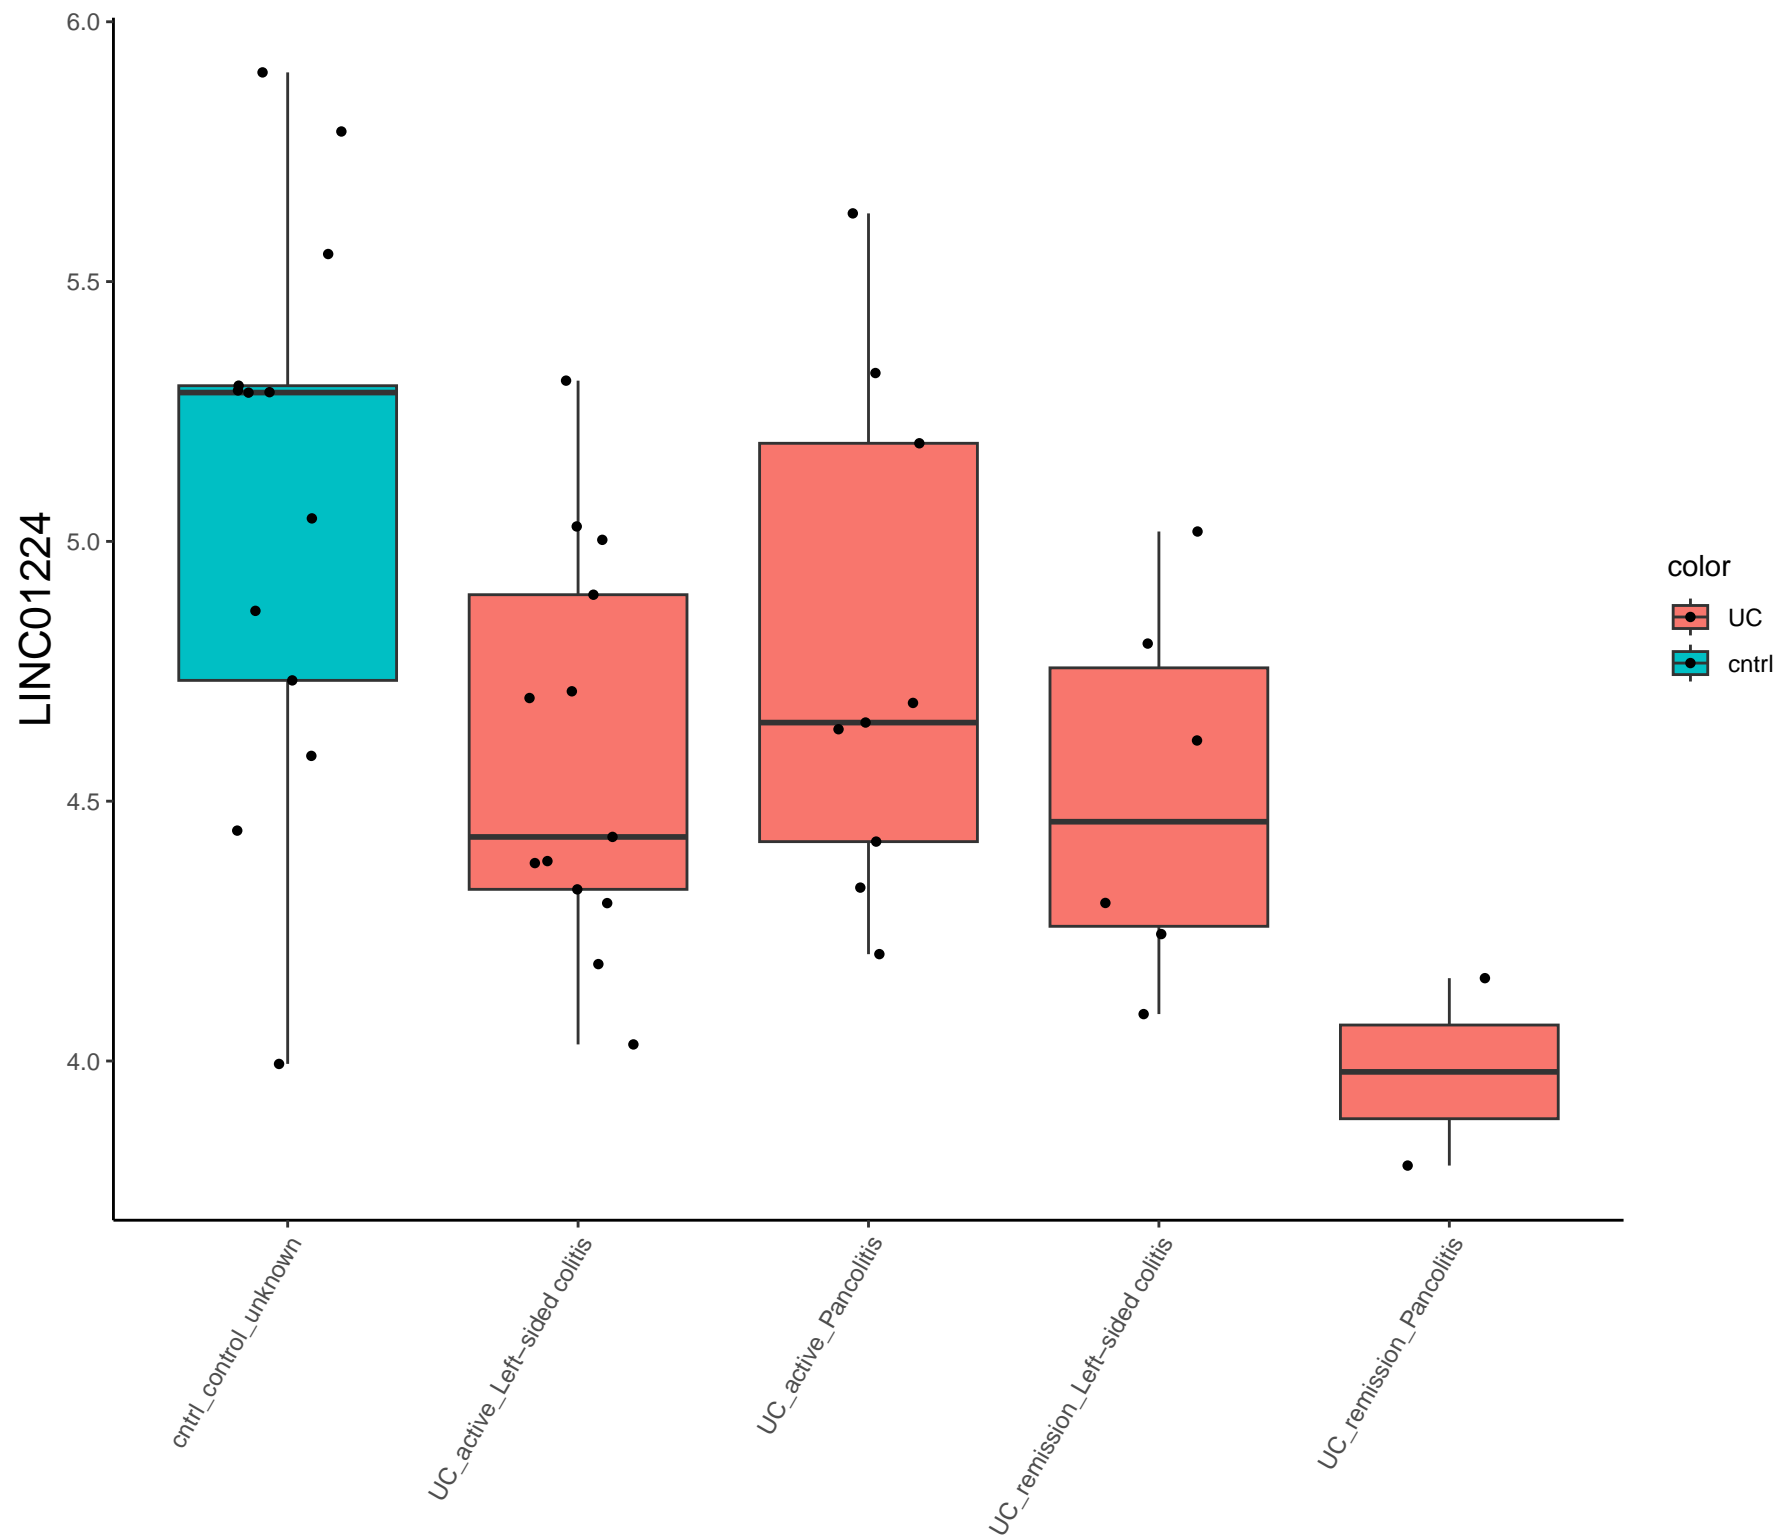

GSE9452

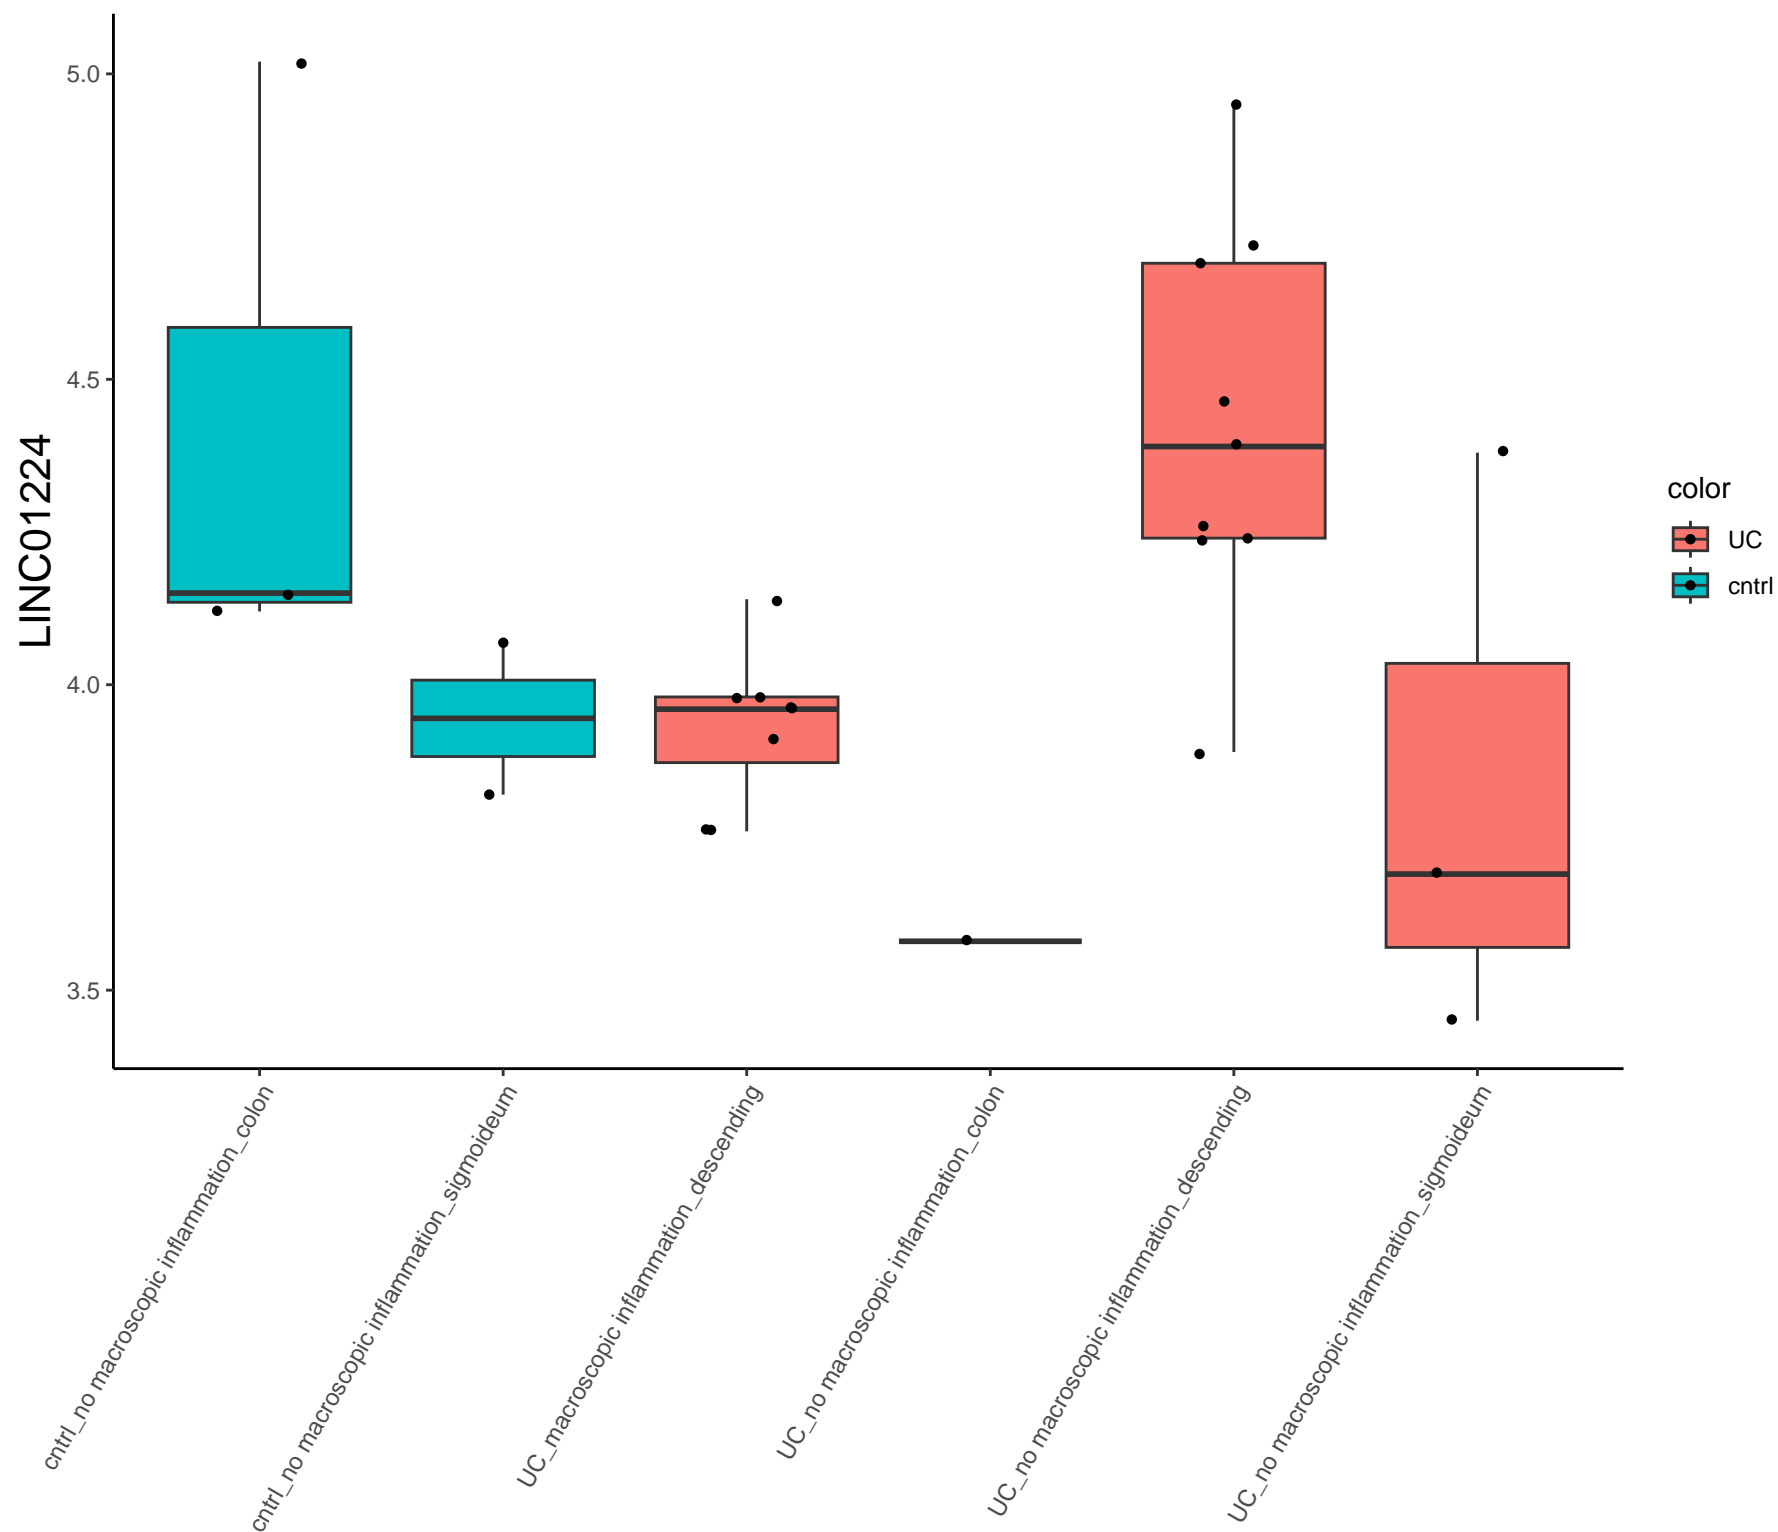

GSE38713

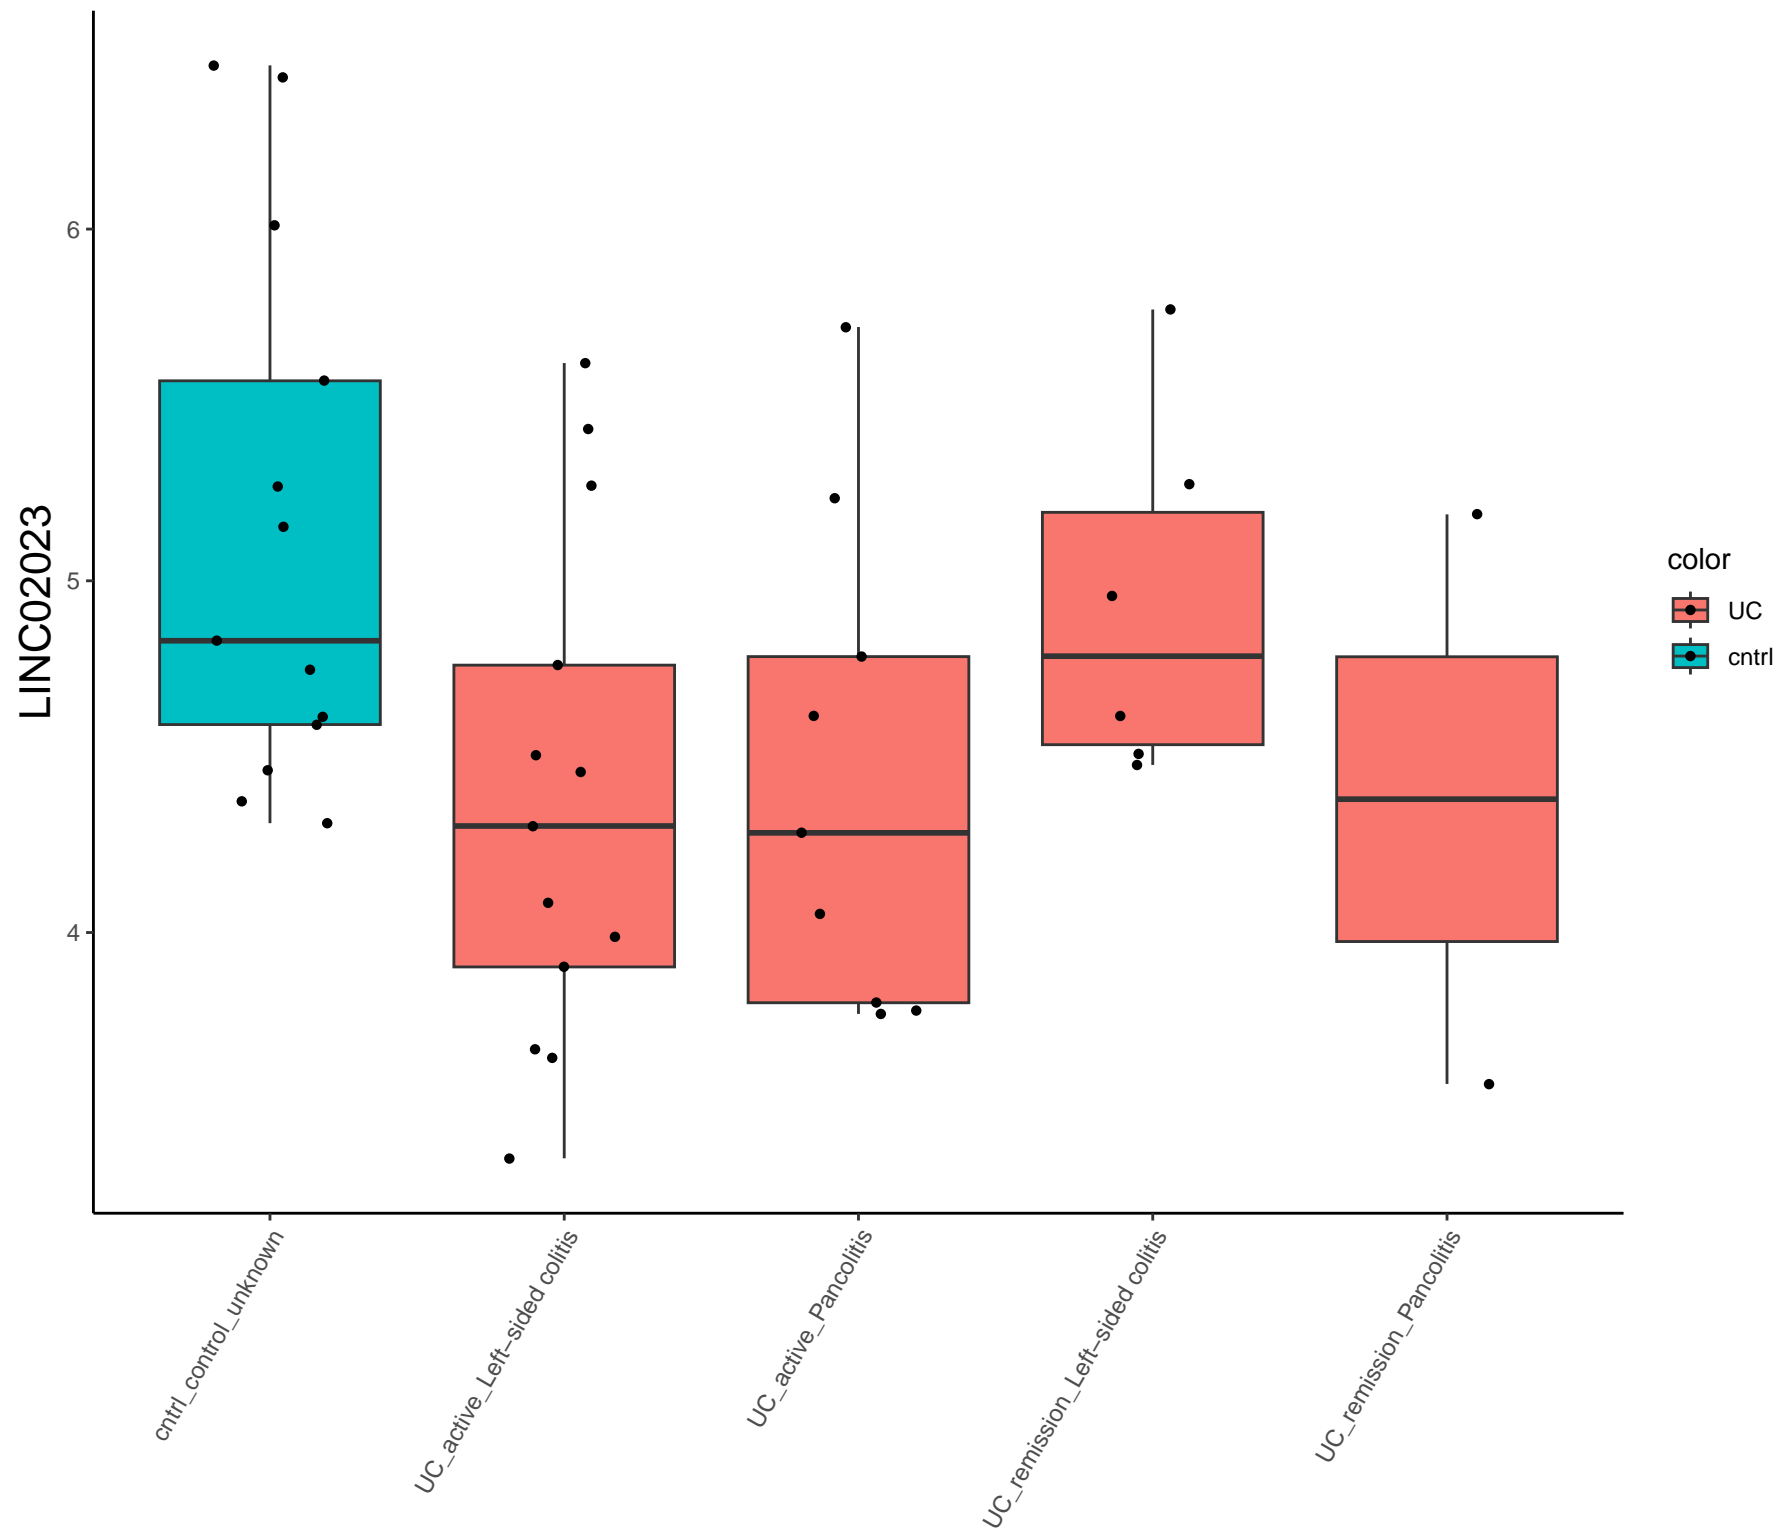

# GSE9452

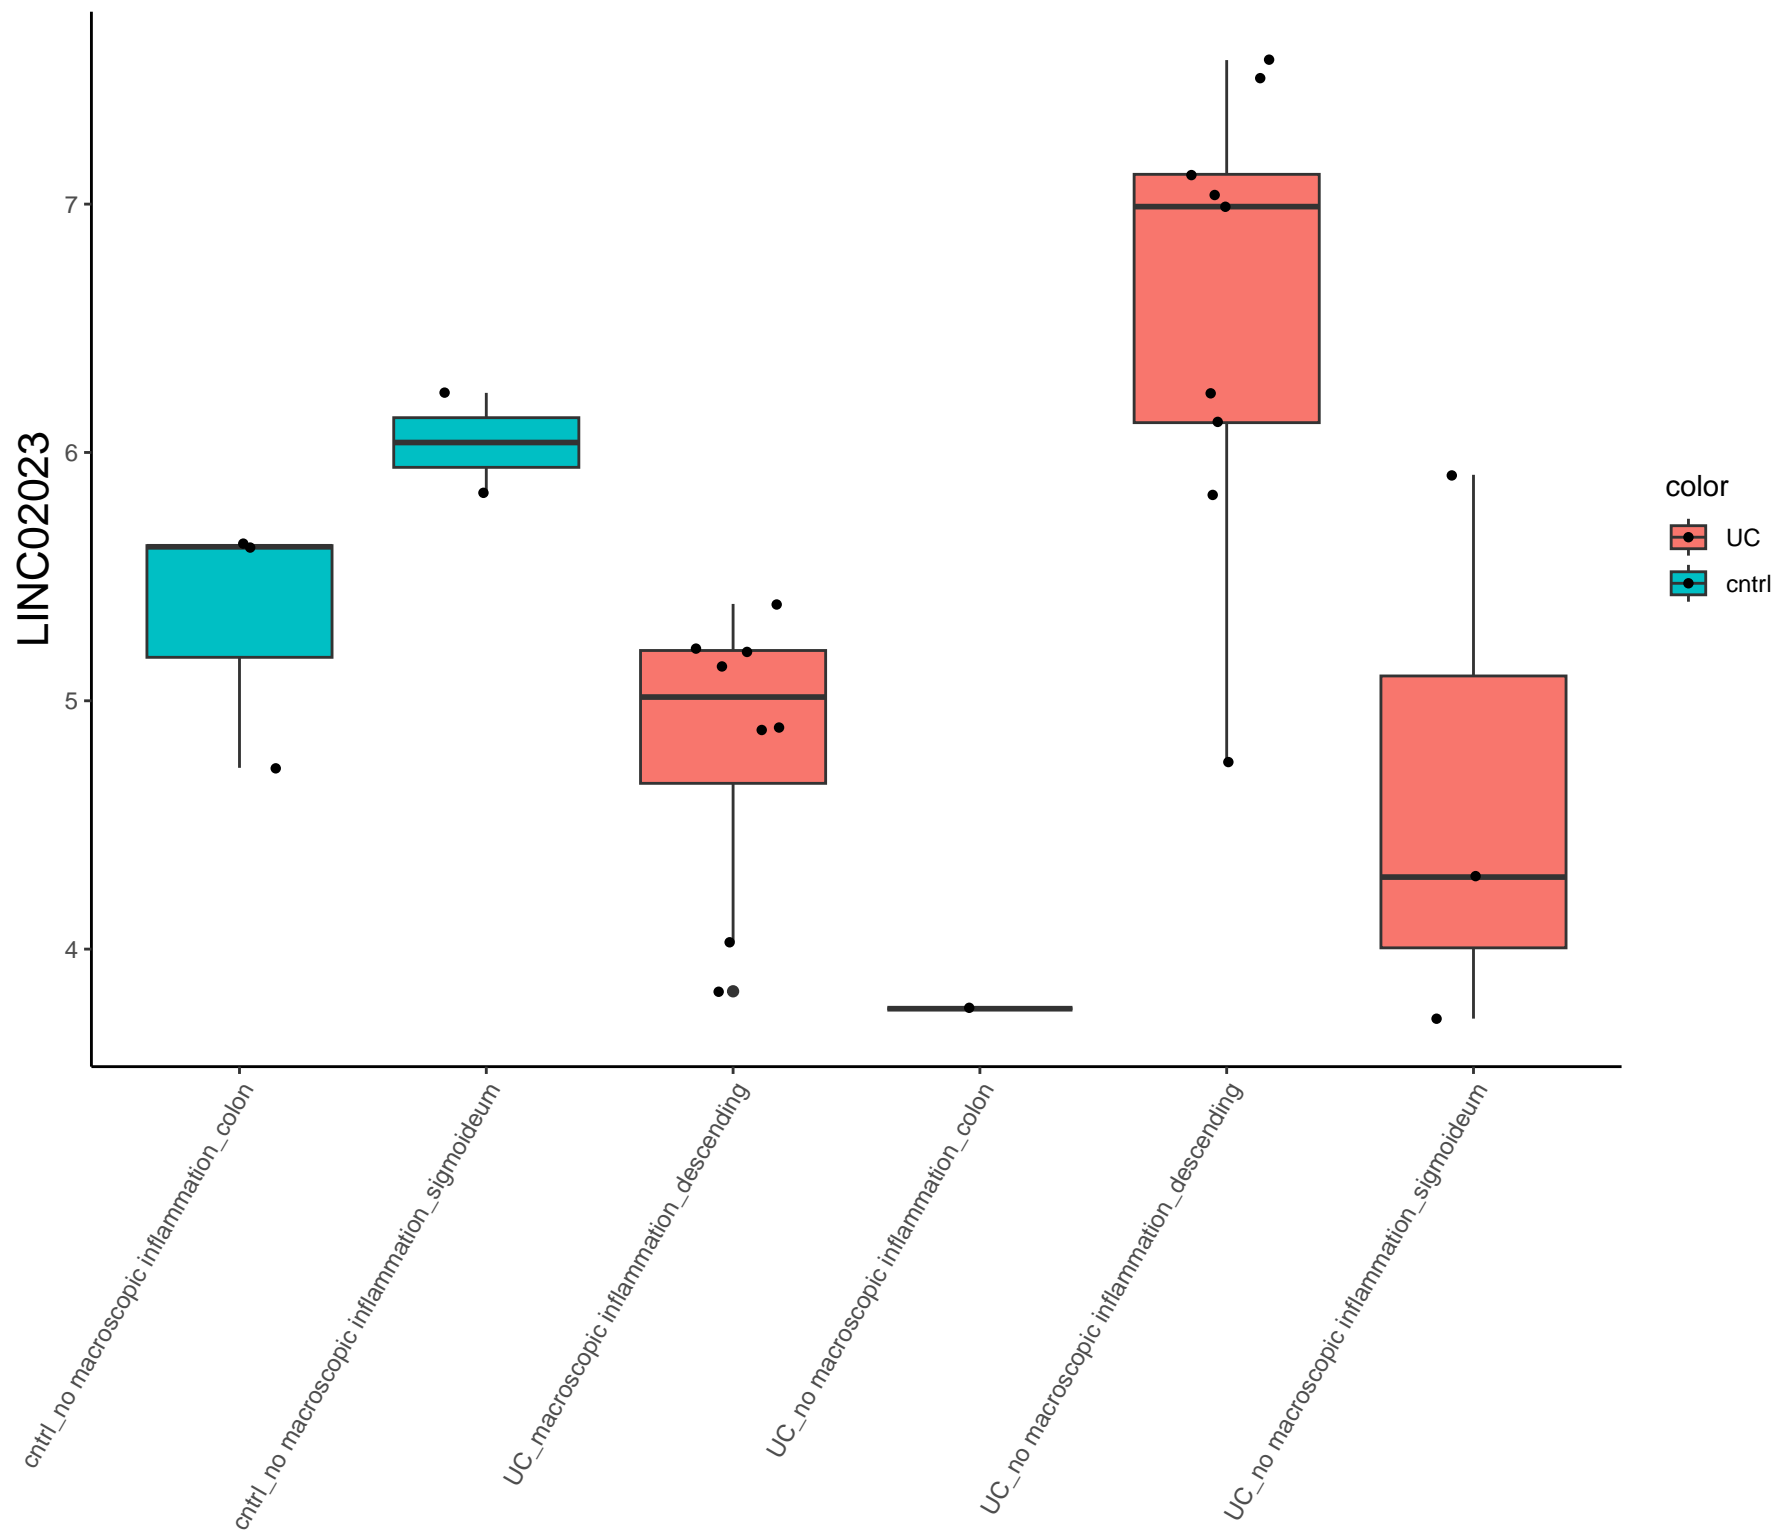

GSE107499

LINC03040

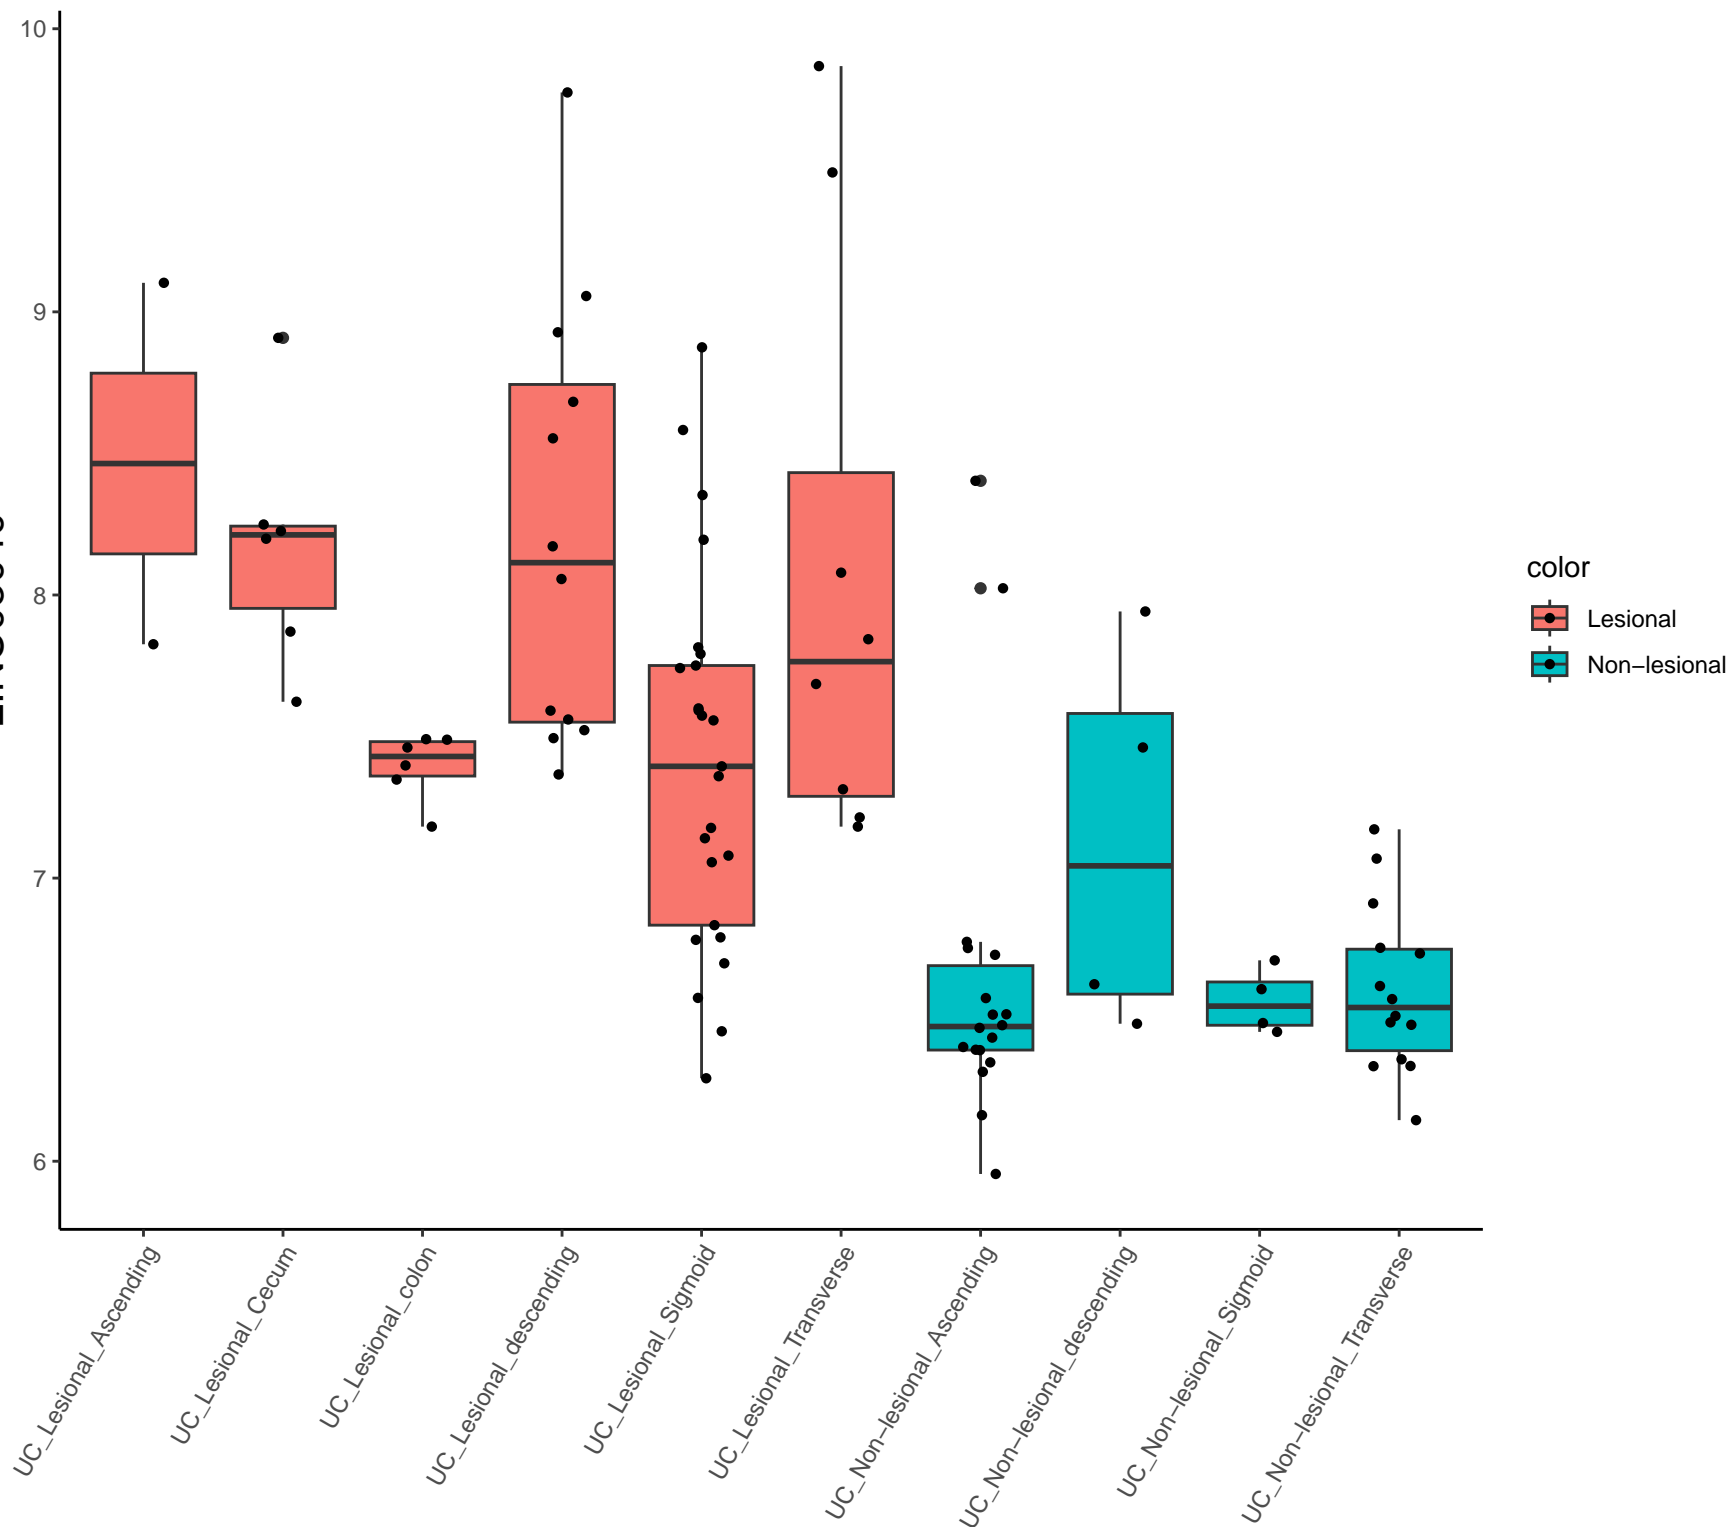

GSE128682

LINC03040

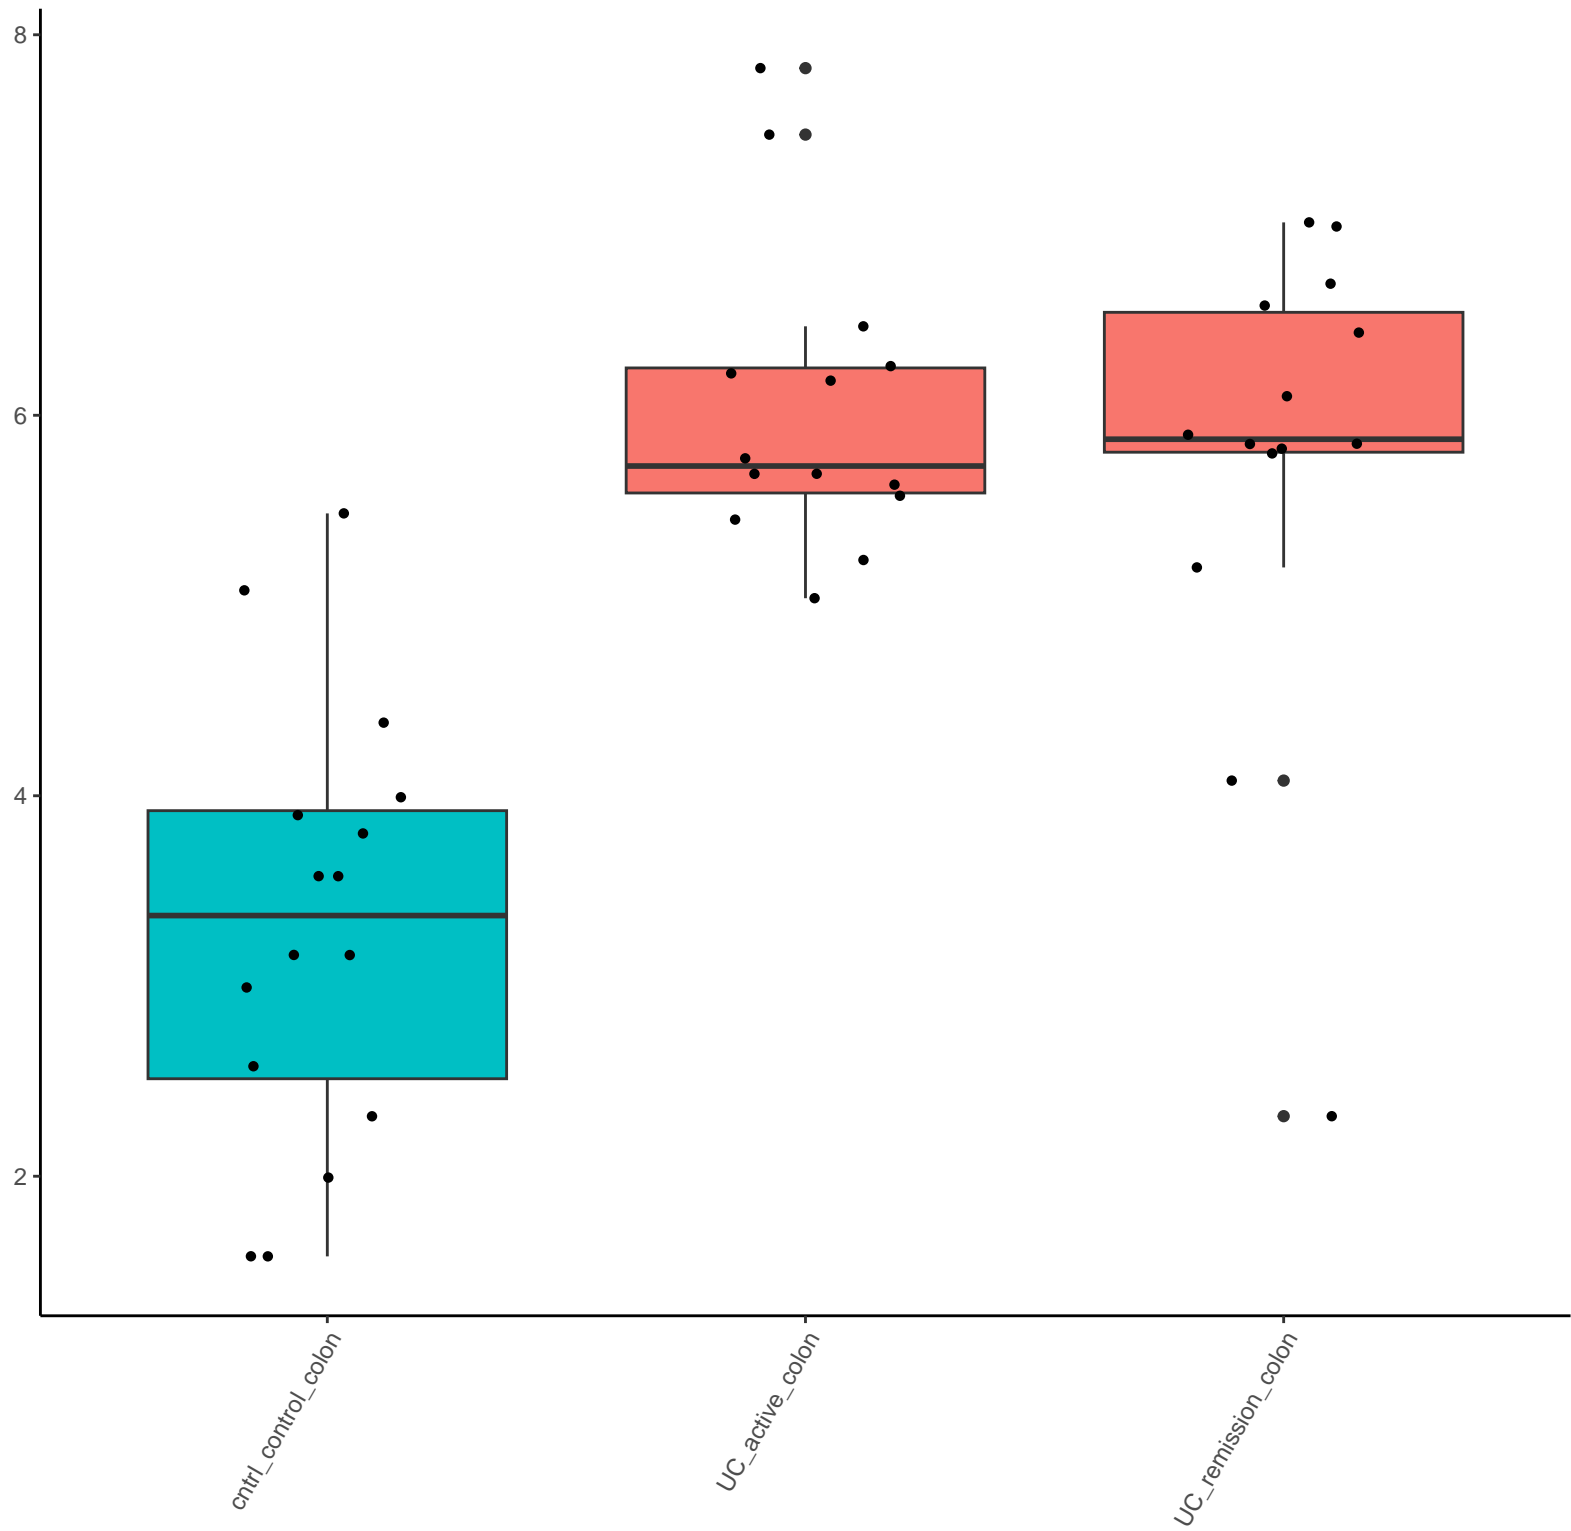

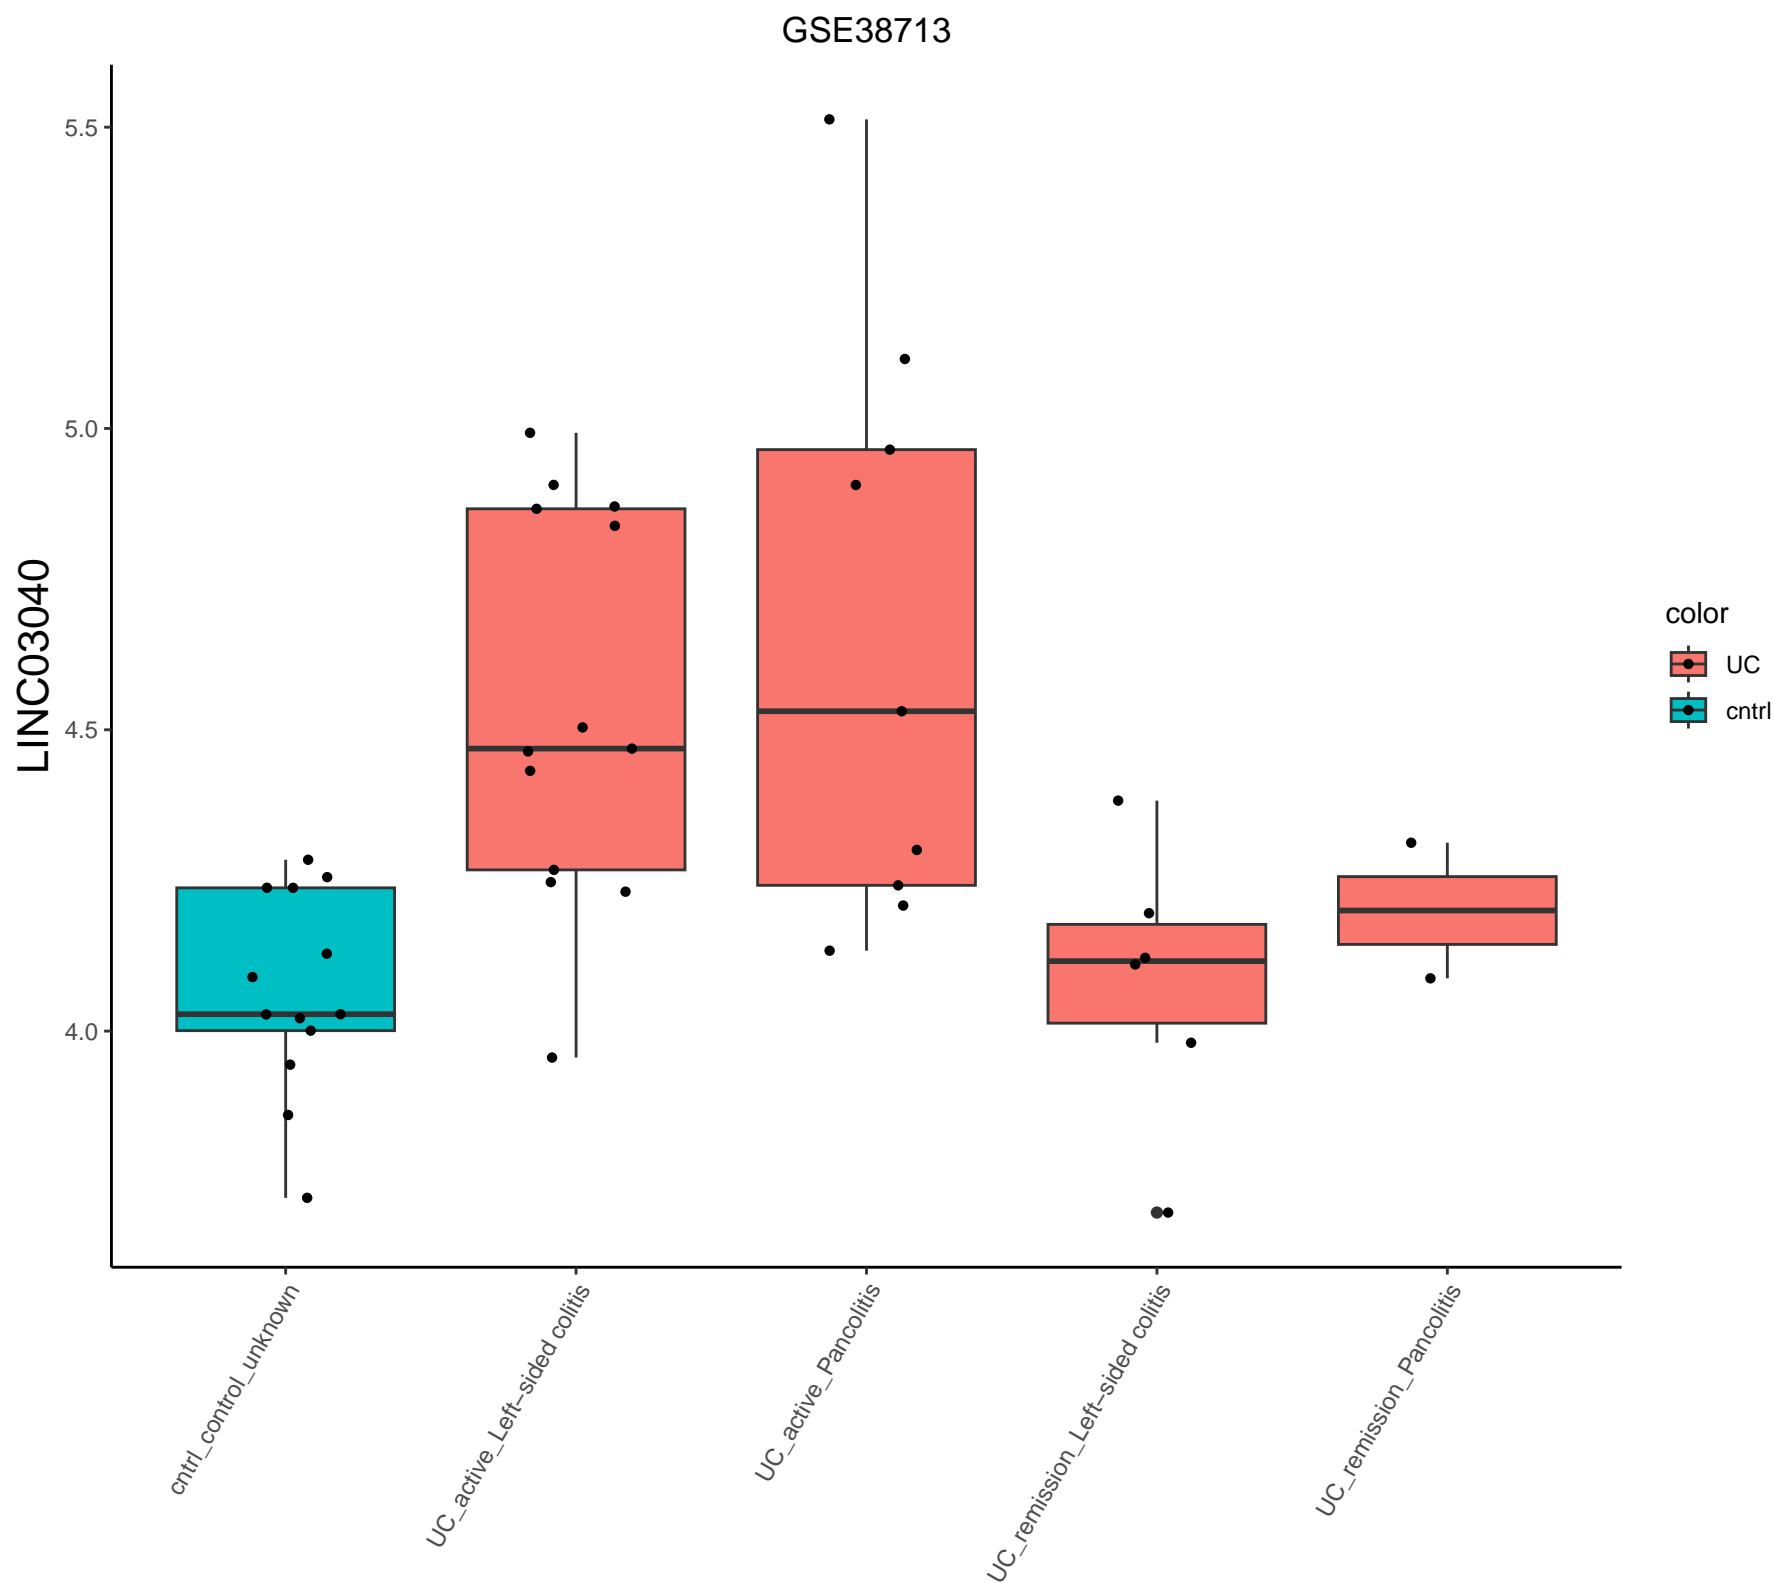

GSE48634

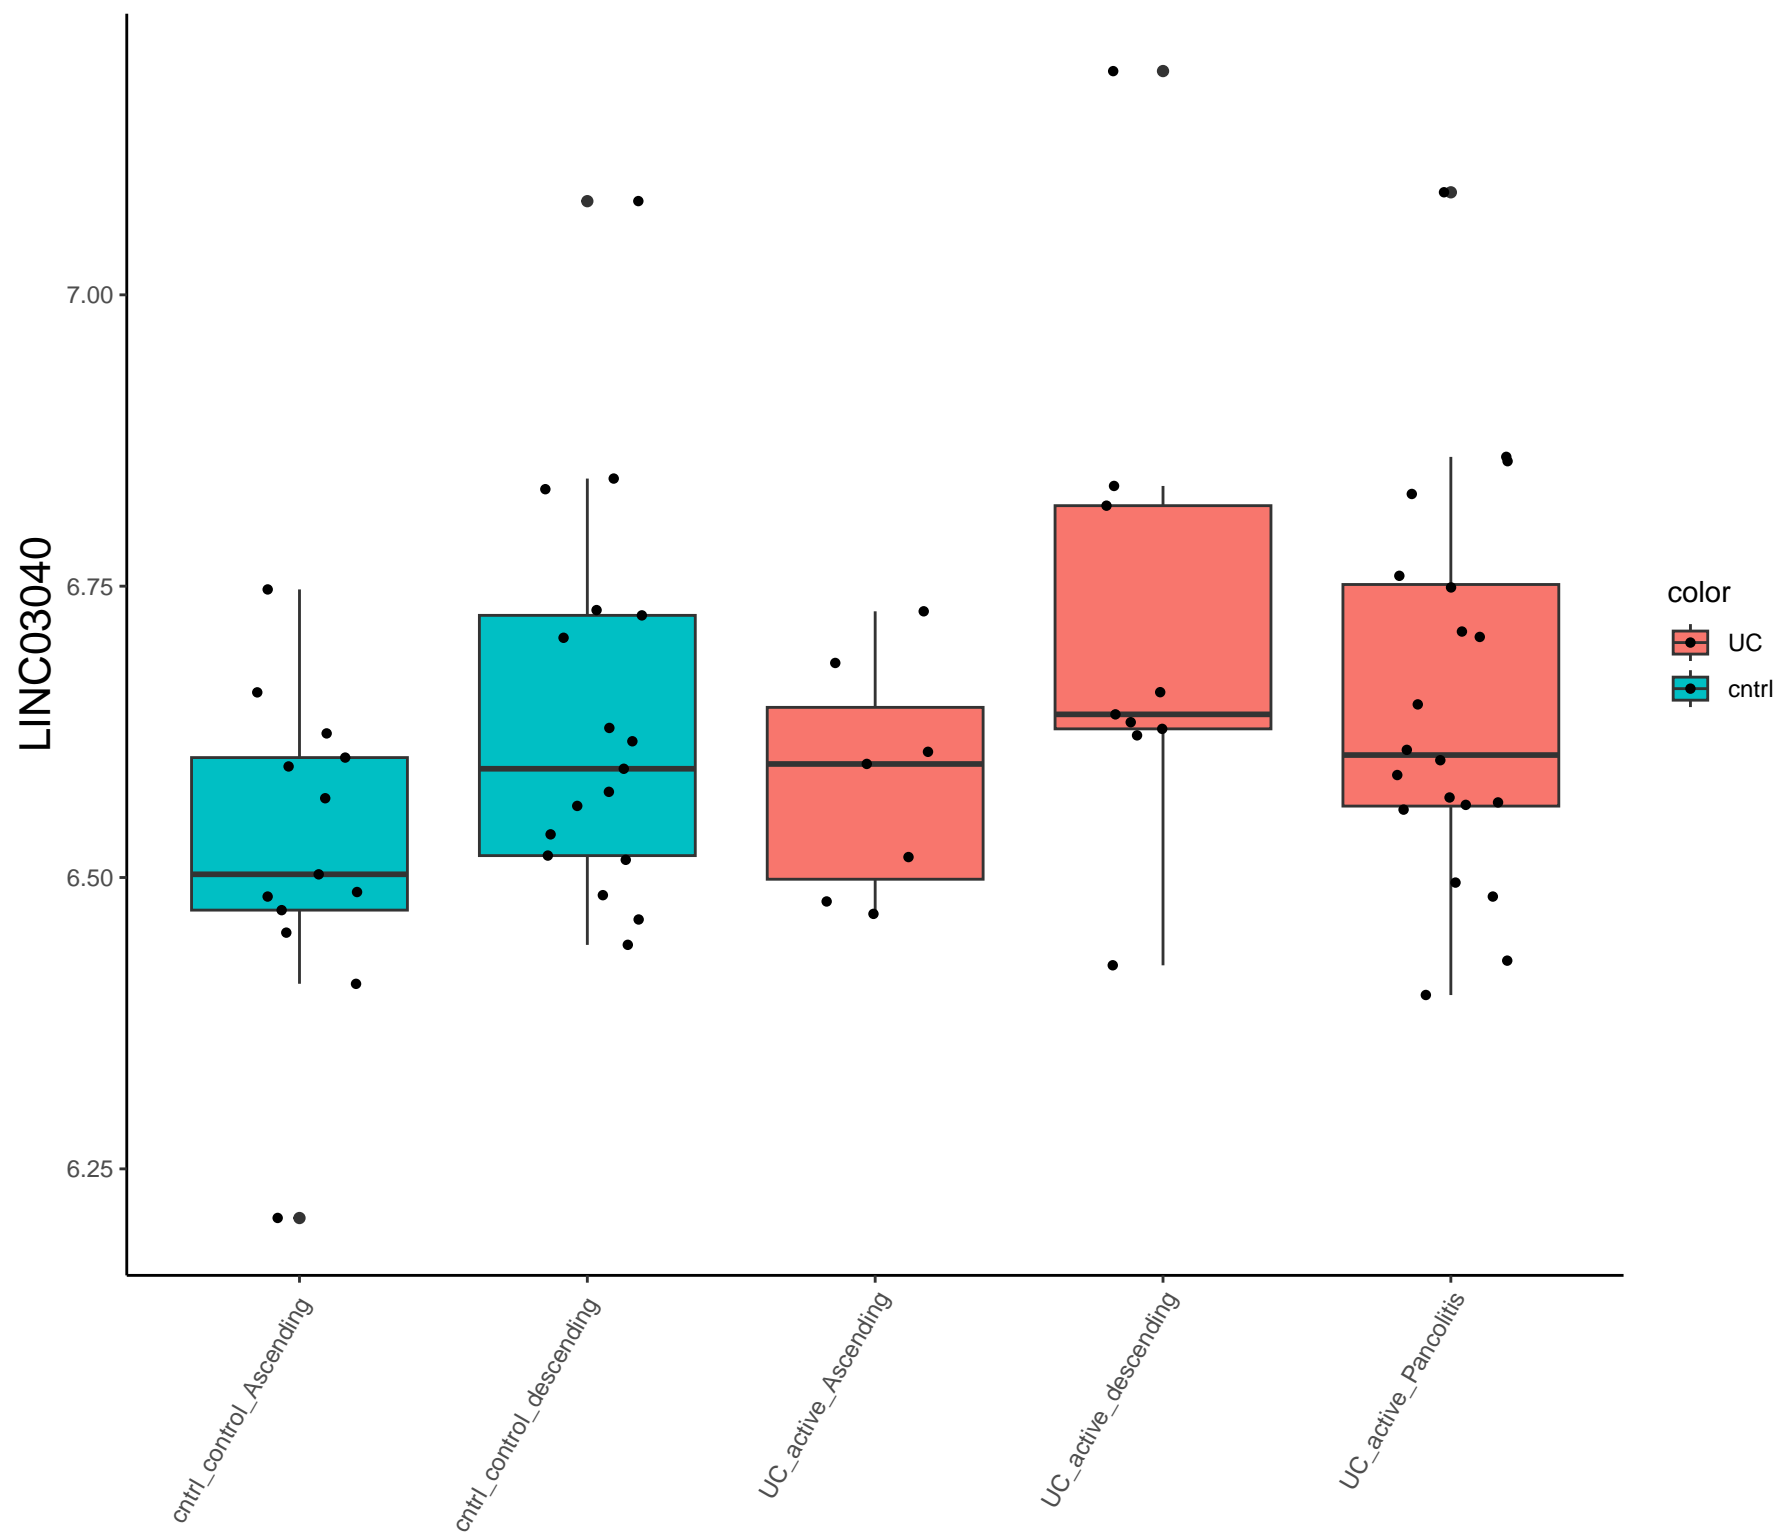



GSE48958

LINC03040

5.75

5.50

5.25

color

UC  
cntrl

cntrl\_control\_colon

UC\_active\_colon

UC\_inactive\_colon

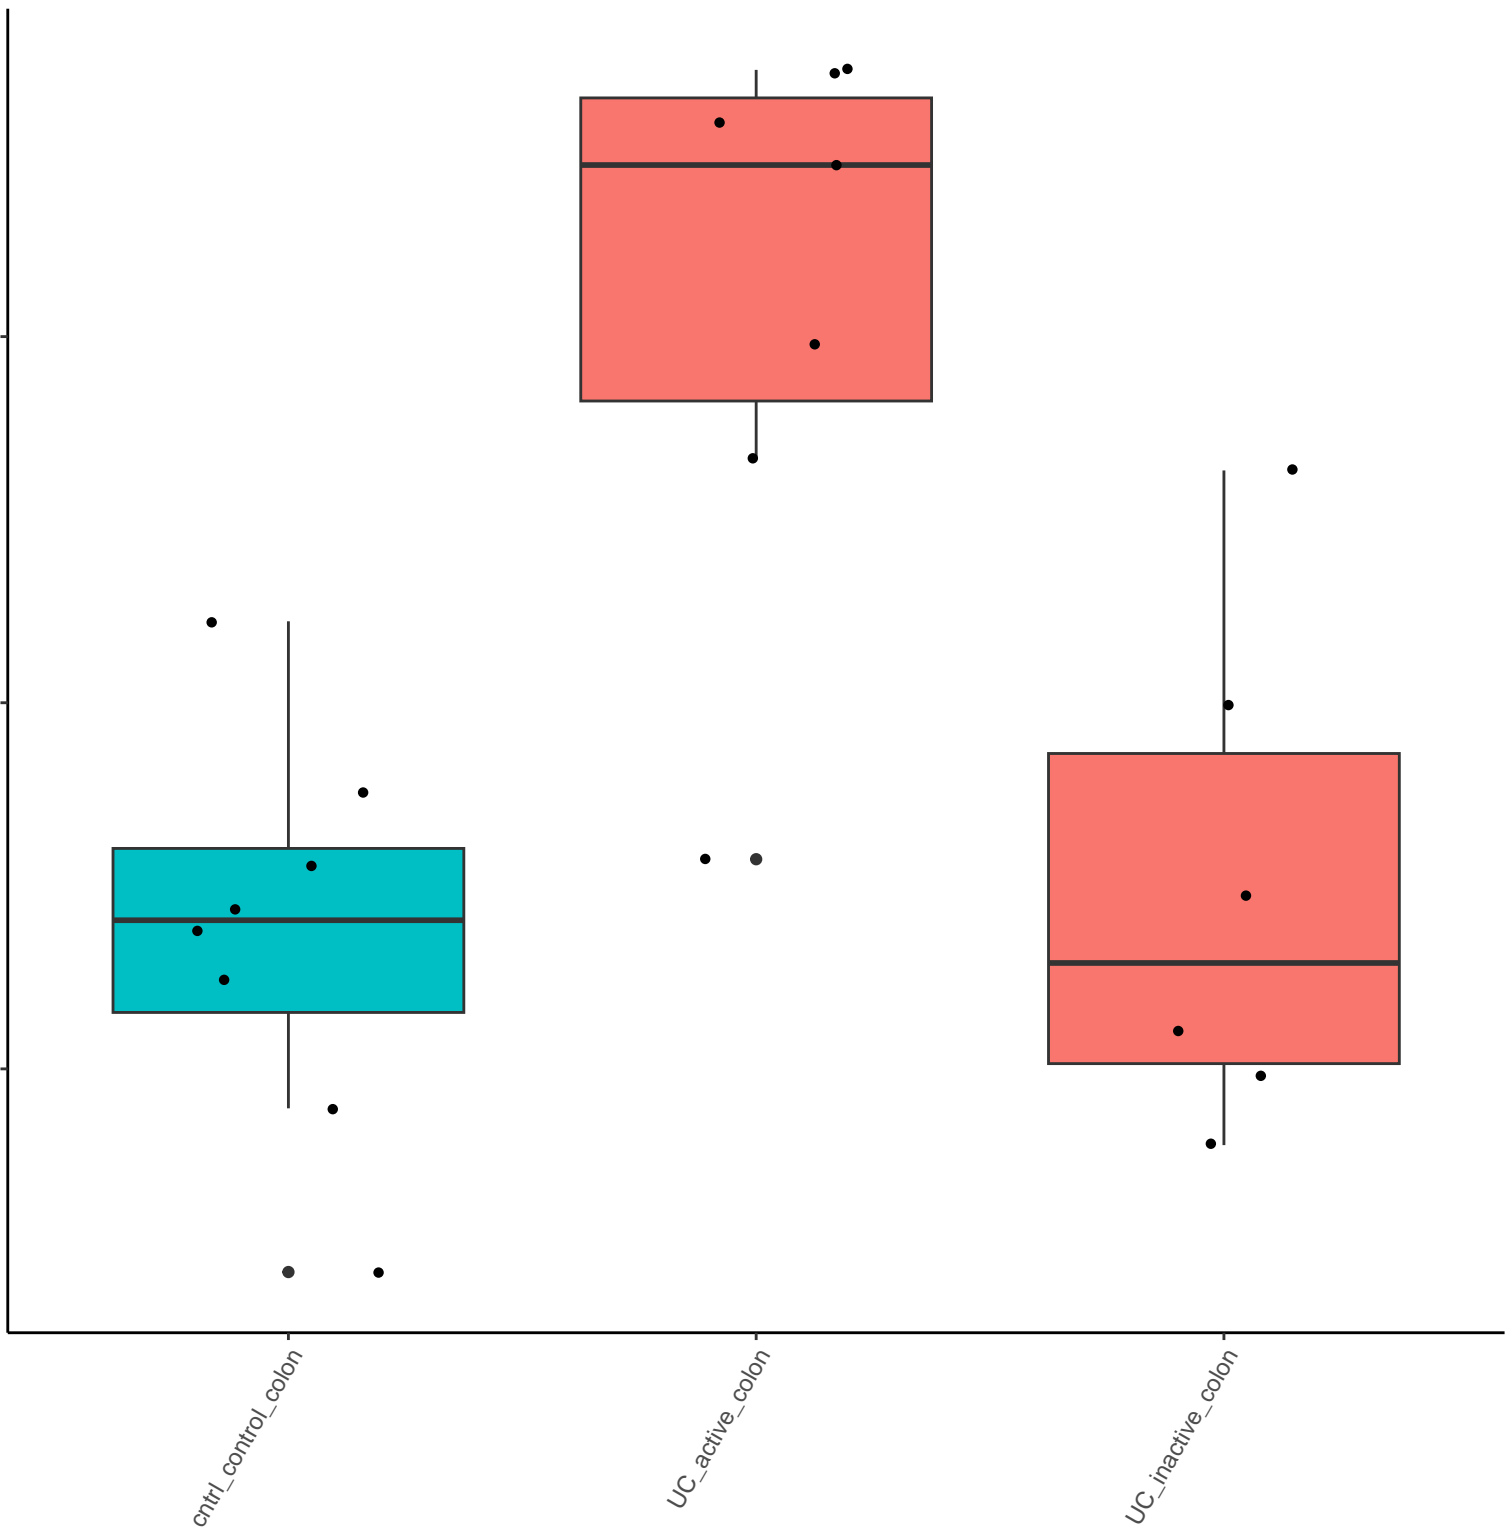

GSE53306

LINC03040

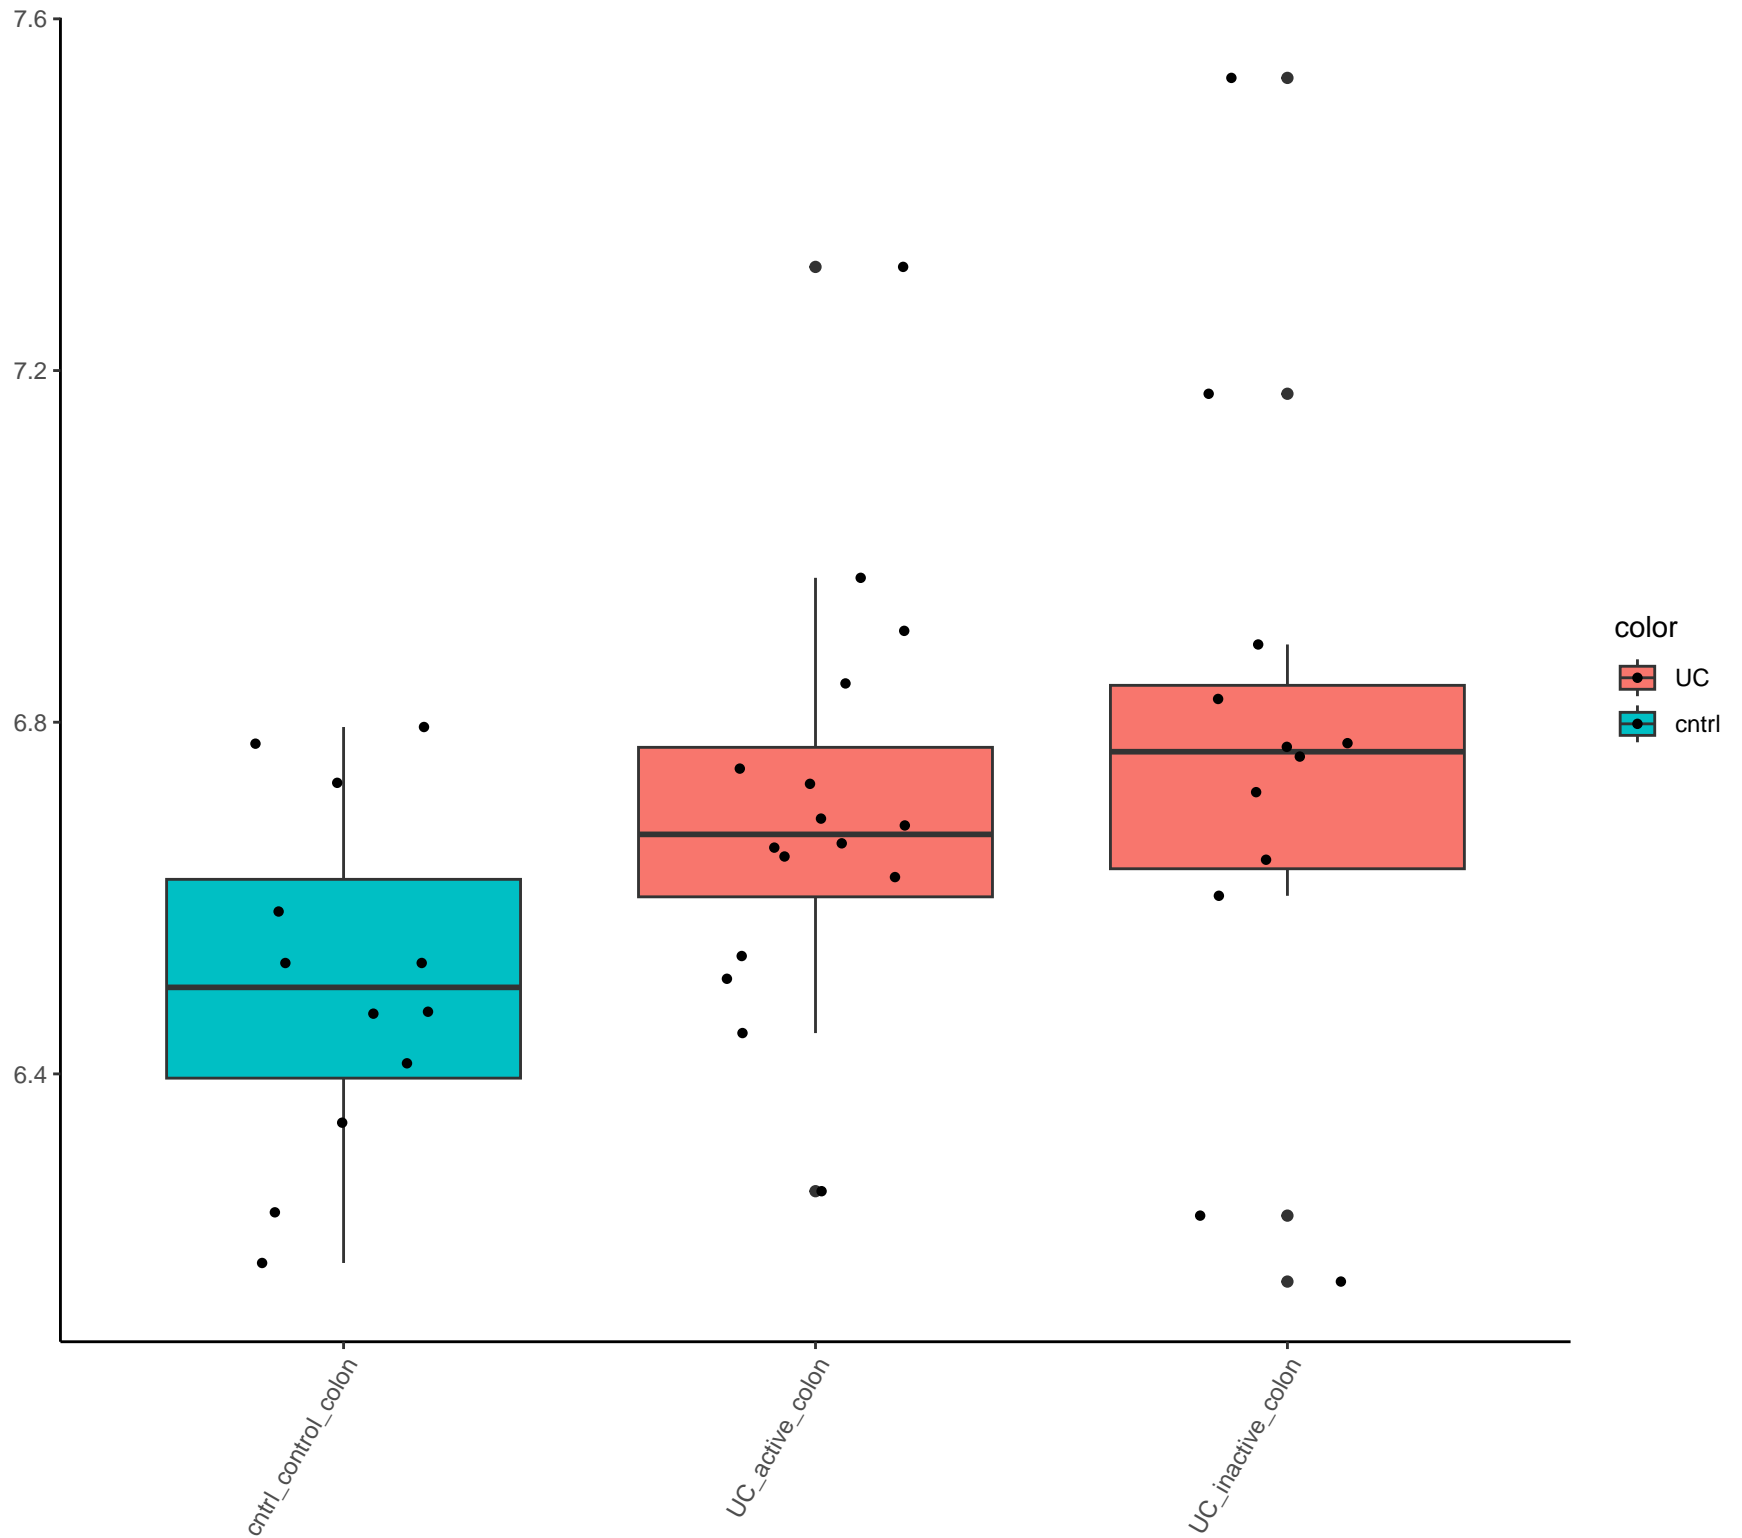

GSE59071

LINC03040

color

UC

cntrl

cntrl\_control\_colon

UC\_active\_colon

UC\_inactive\_colon

5.5

6.0

6.5

7.0

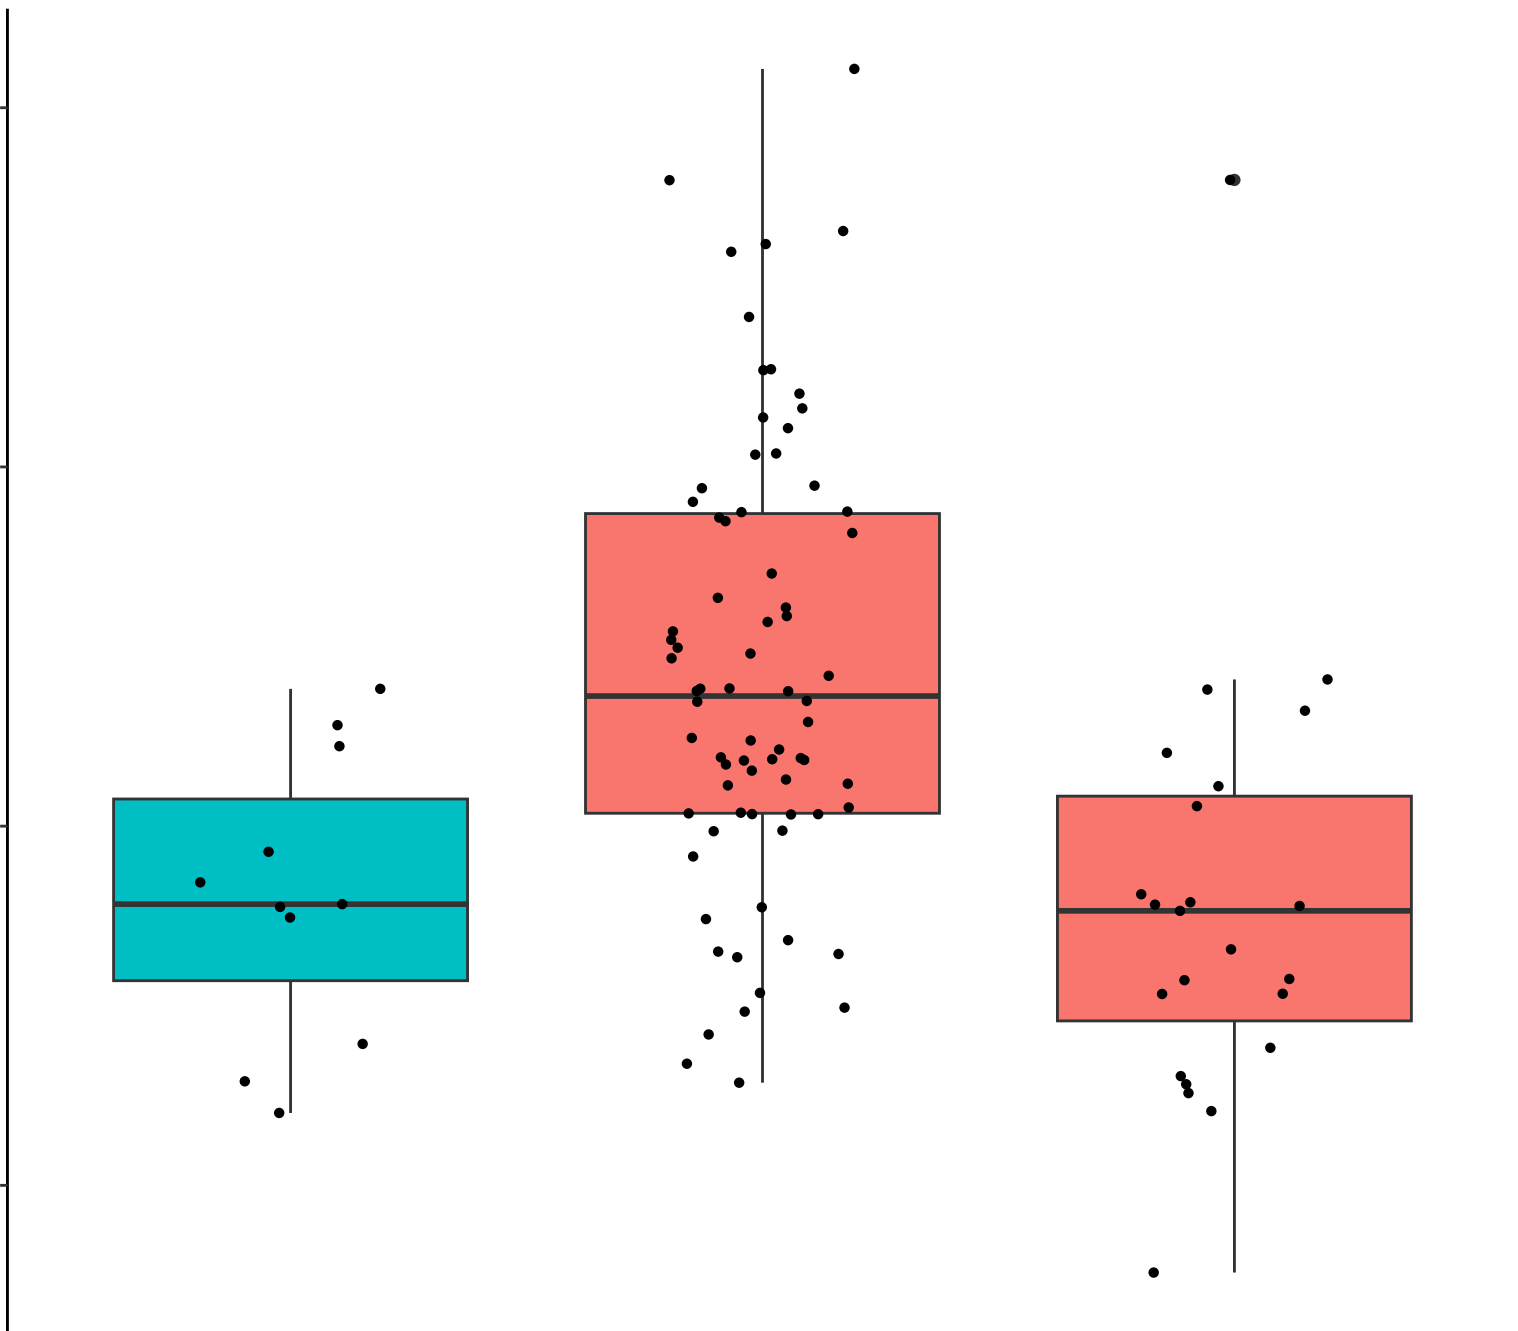

GSE9452

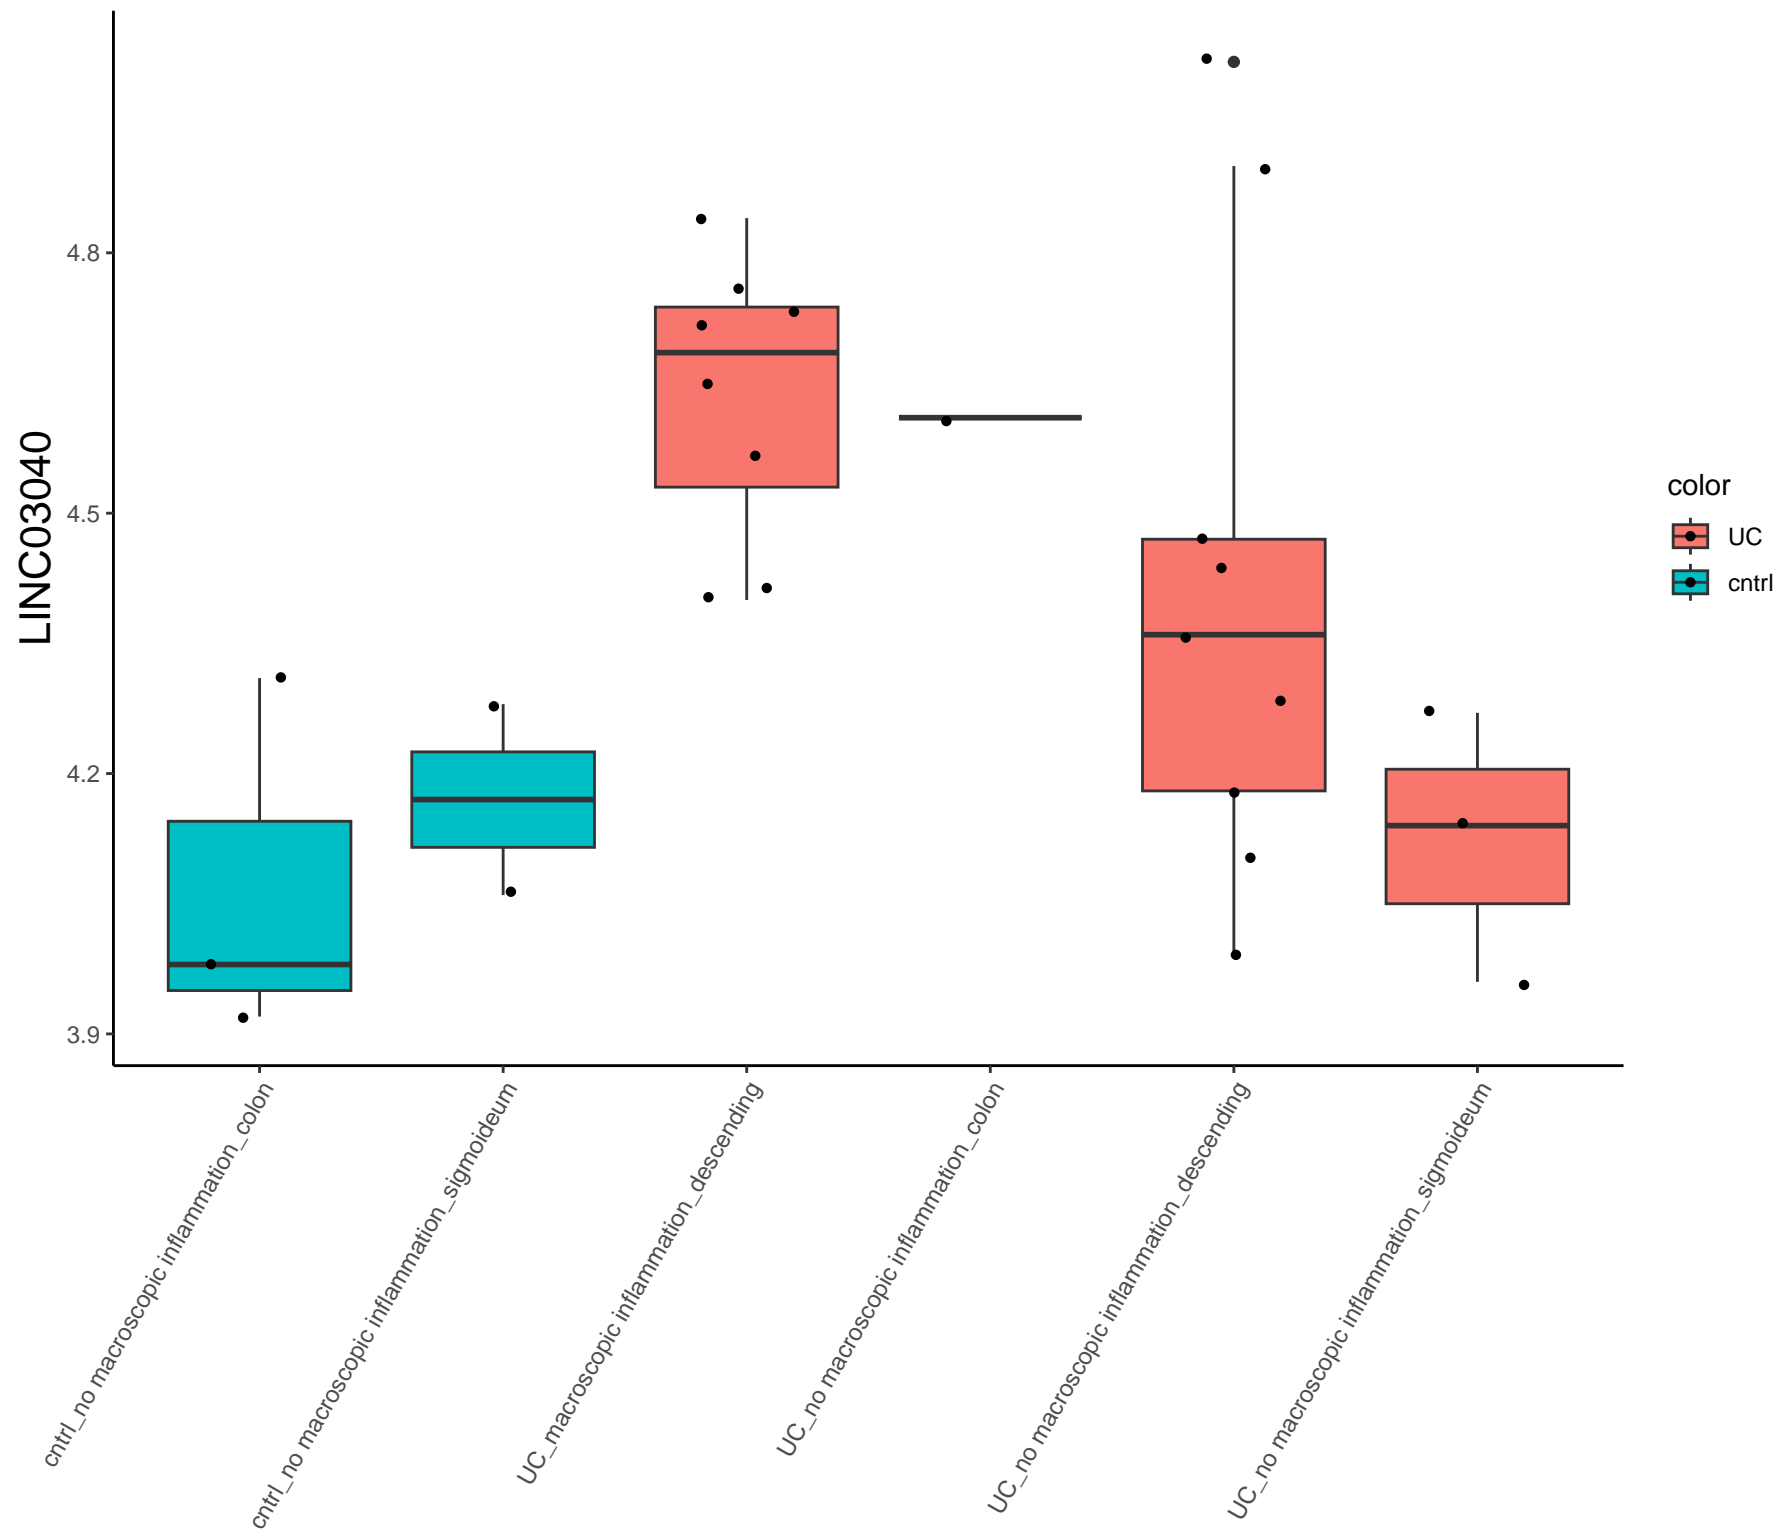

GSE128682

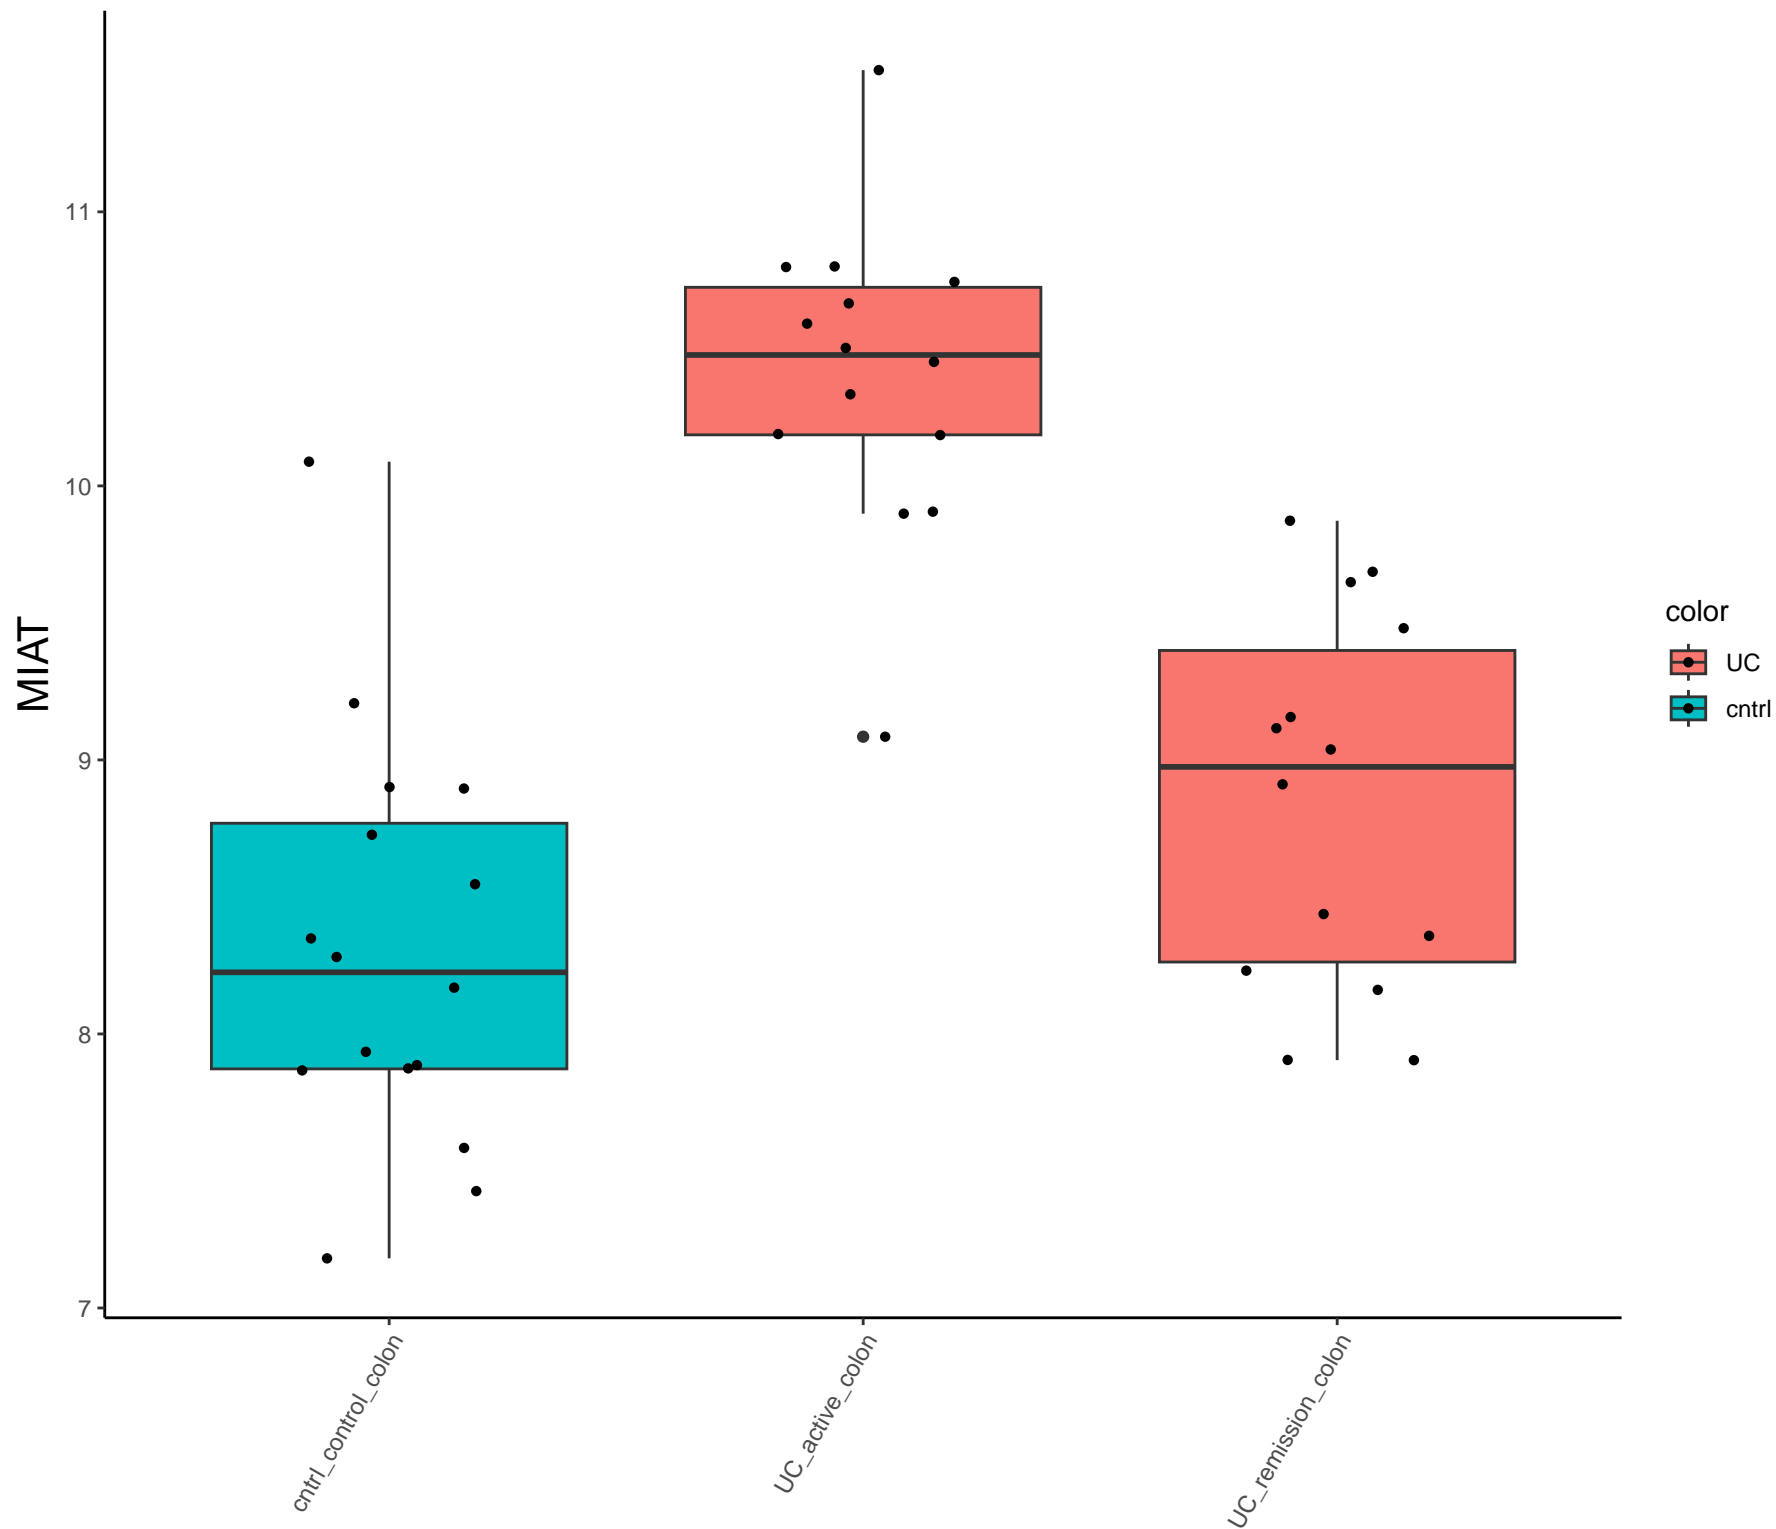

GSE38713

MIAT

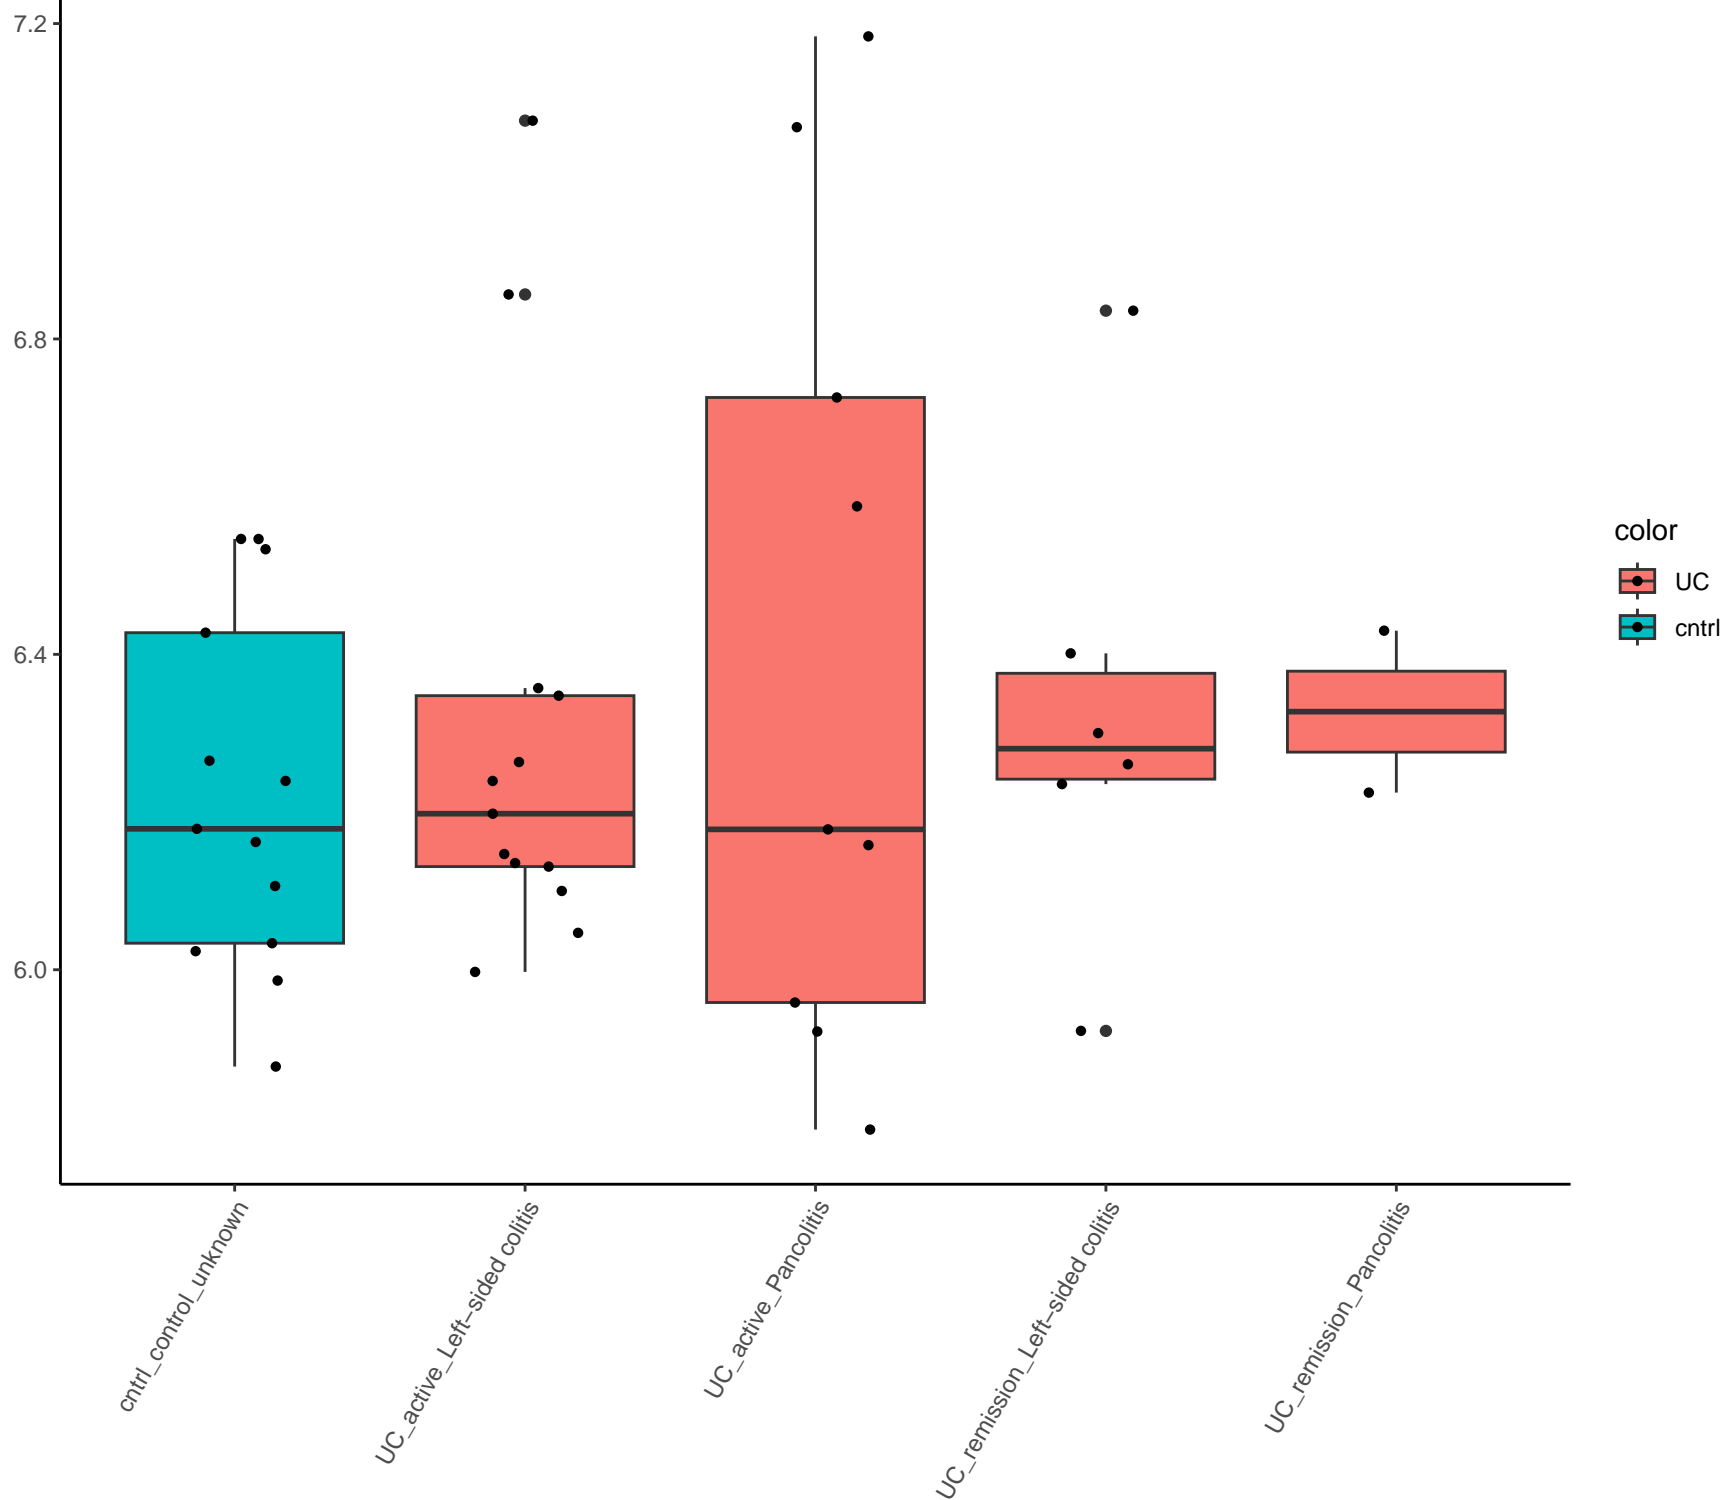

GSE48634

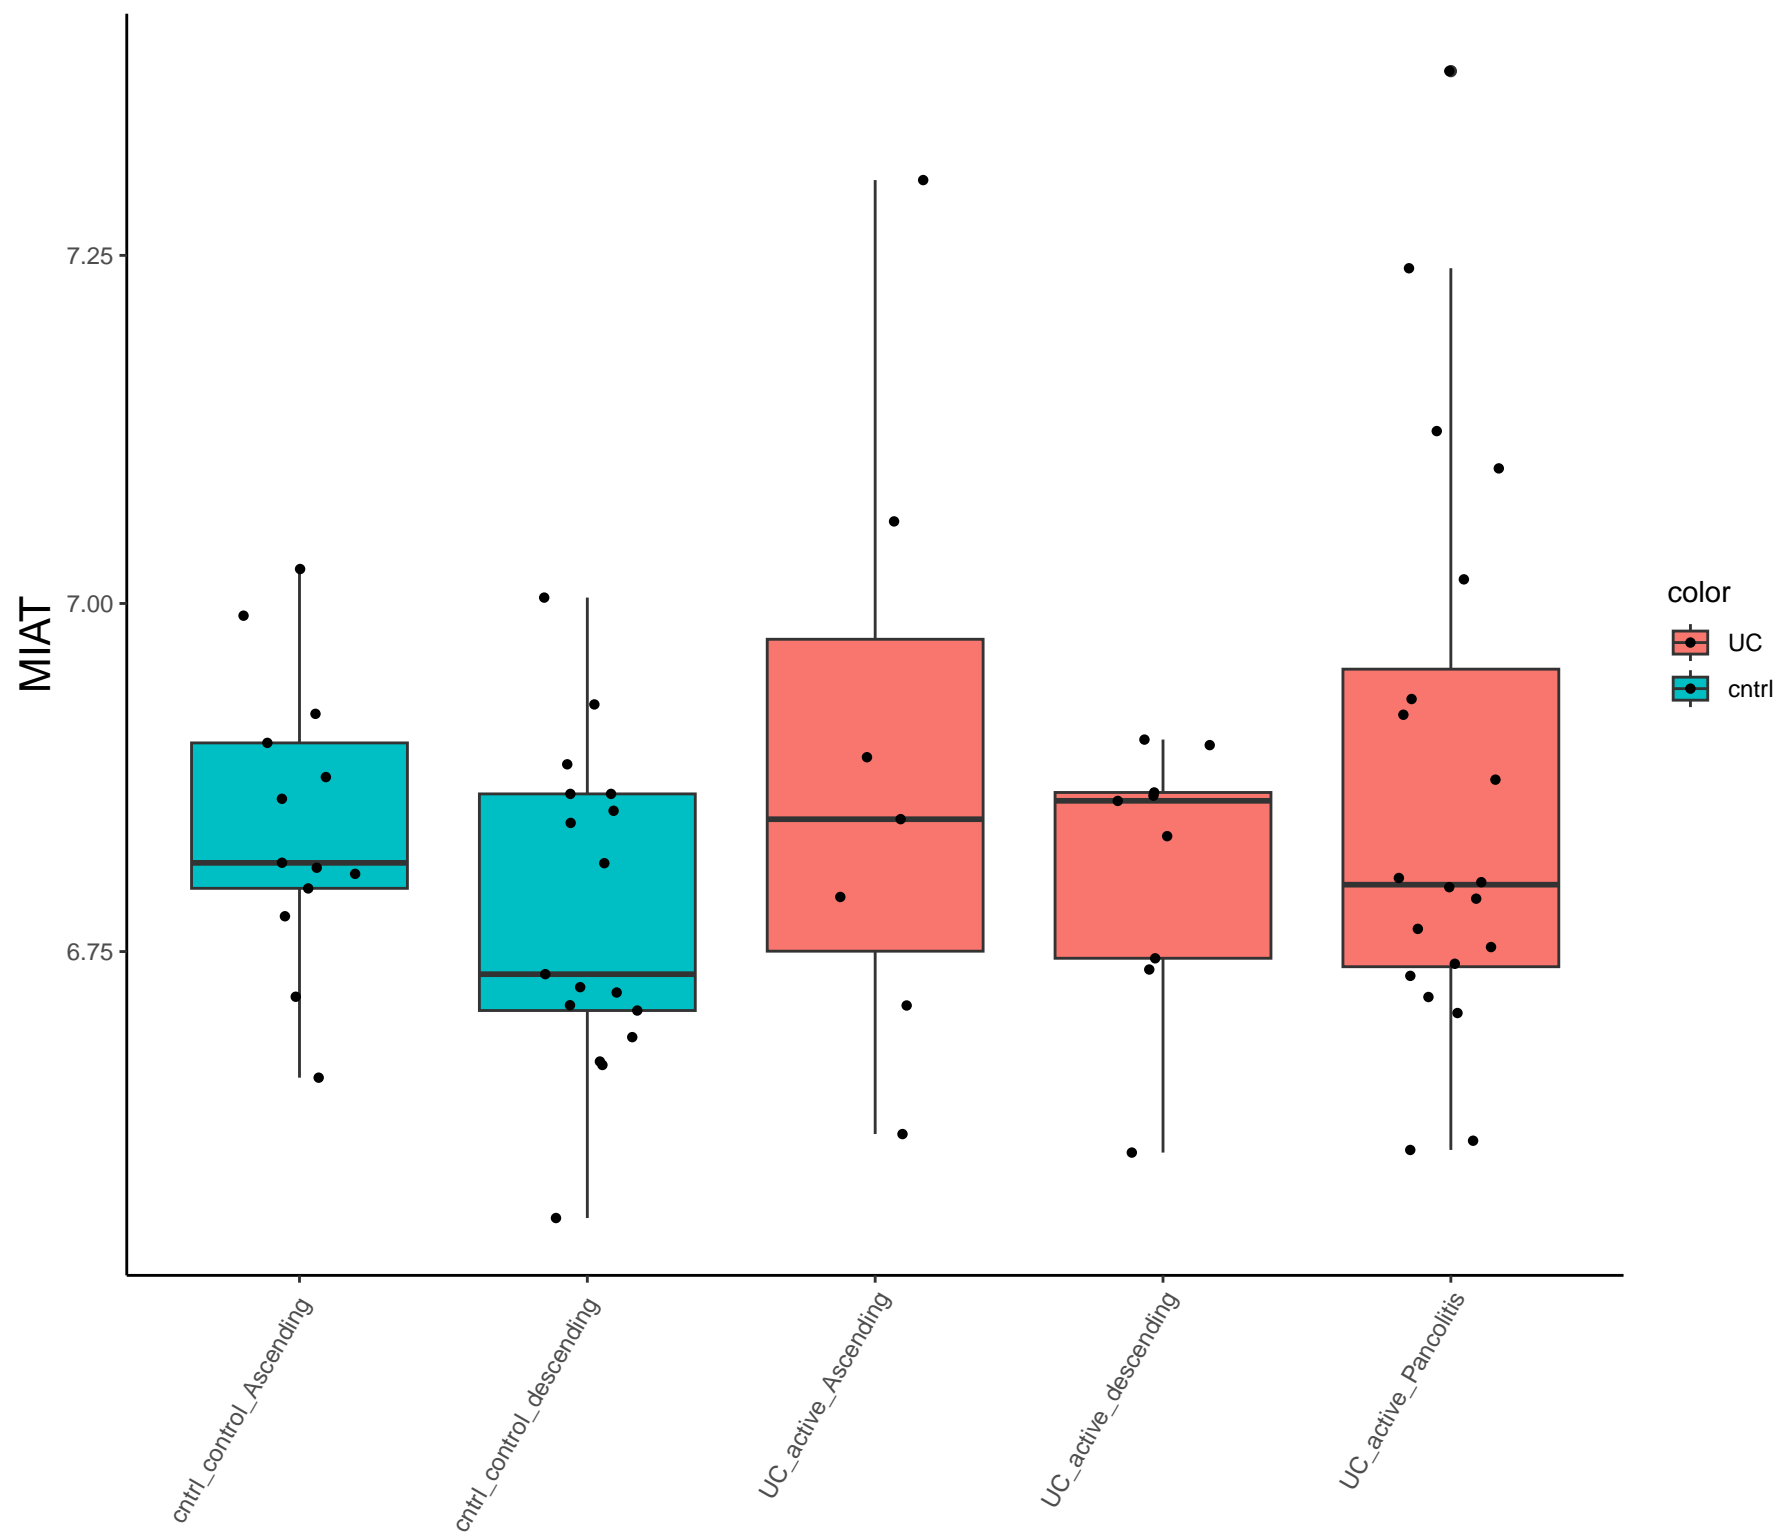

GSE9452

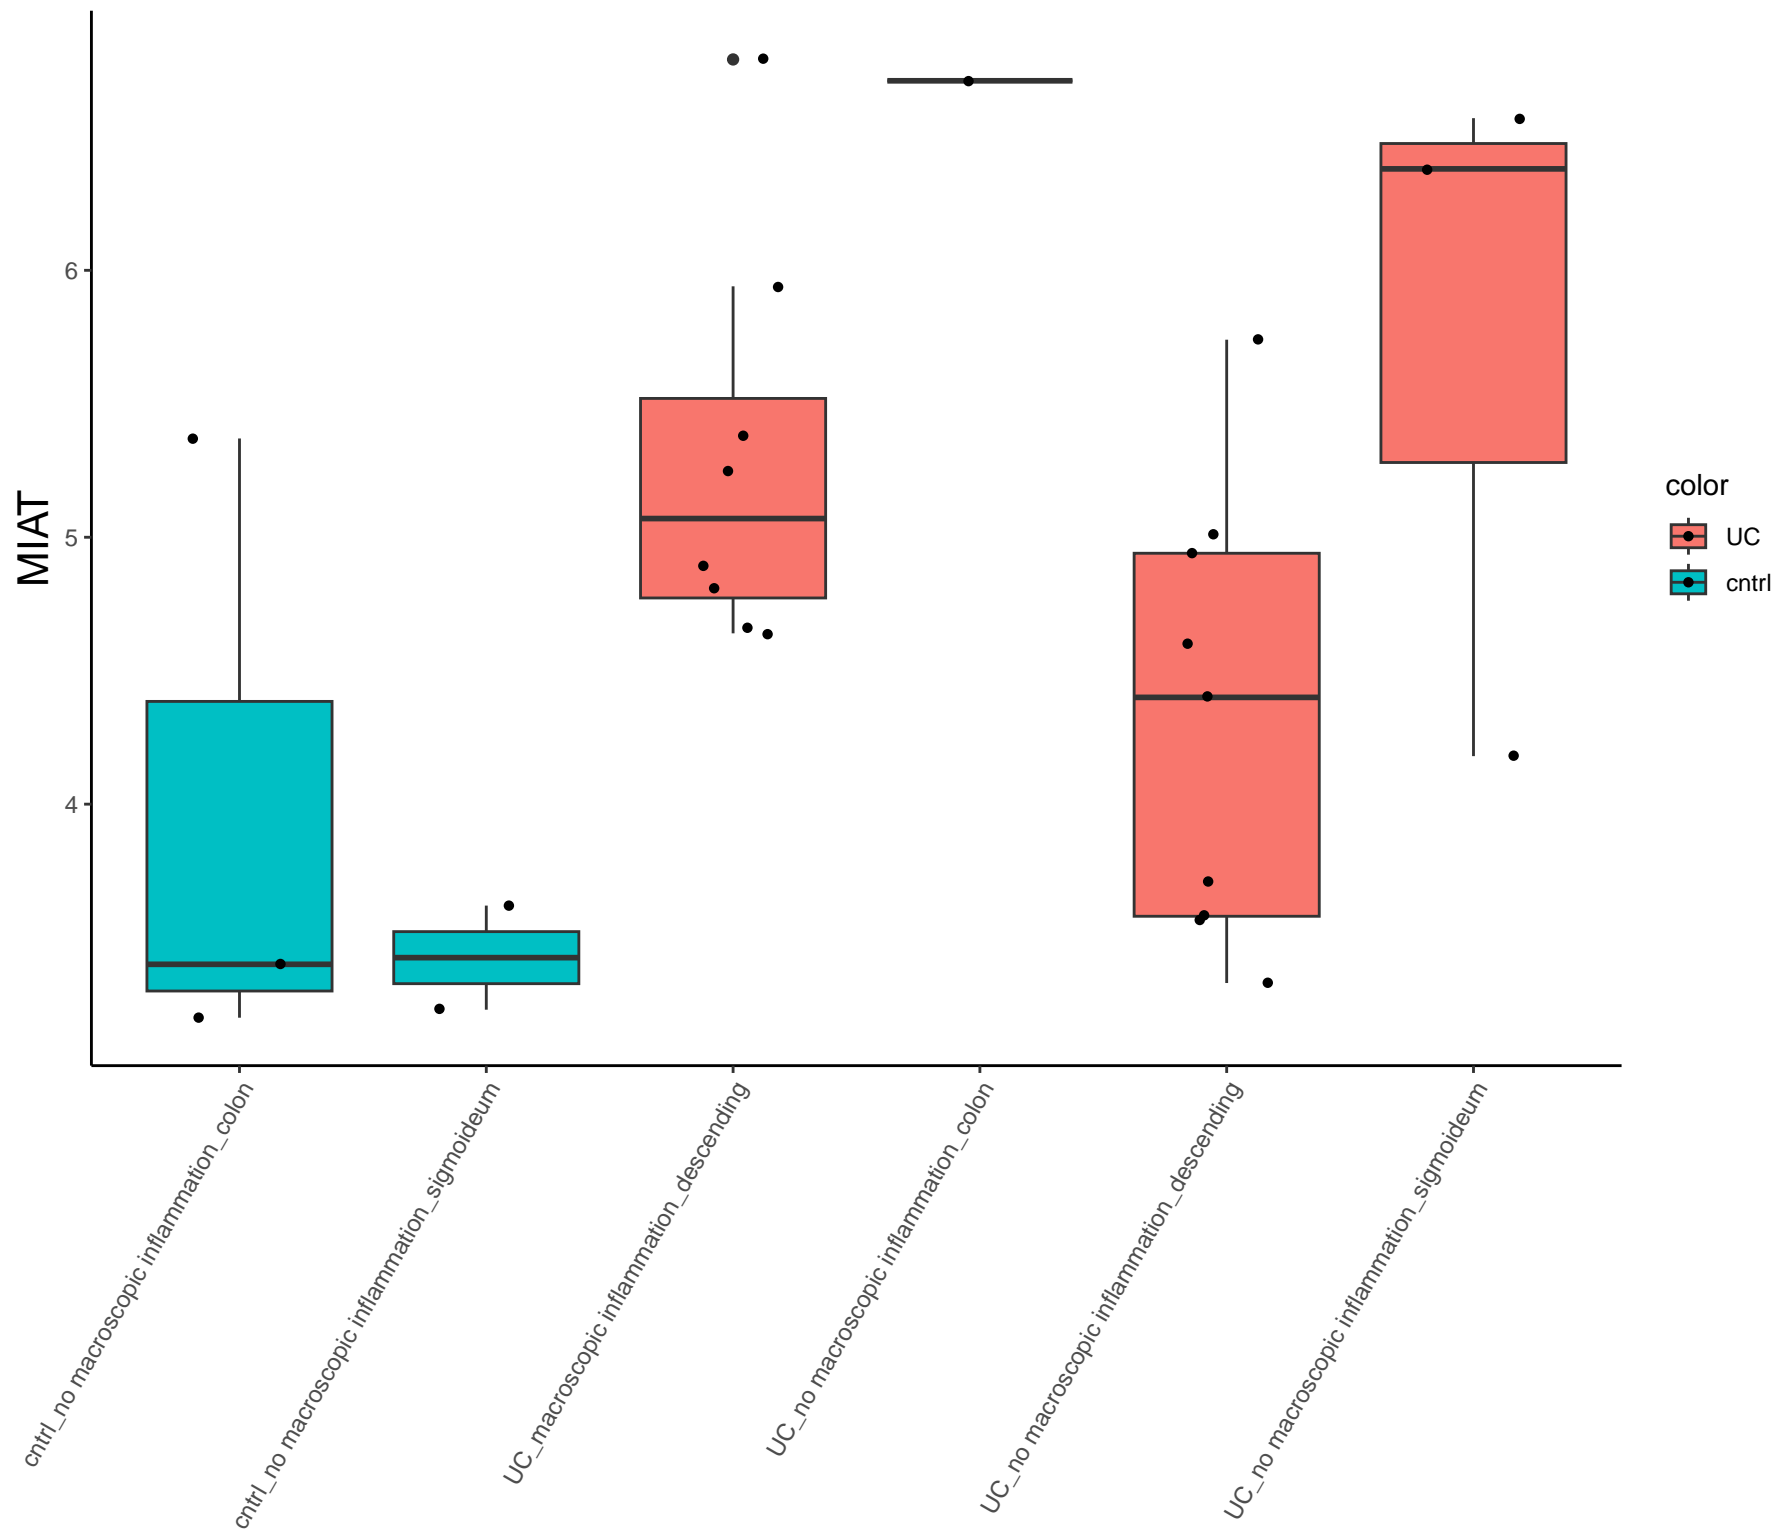



GSE128682

MIR155HG

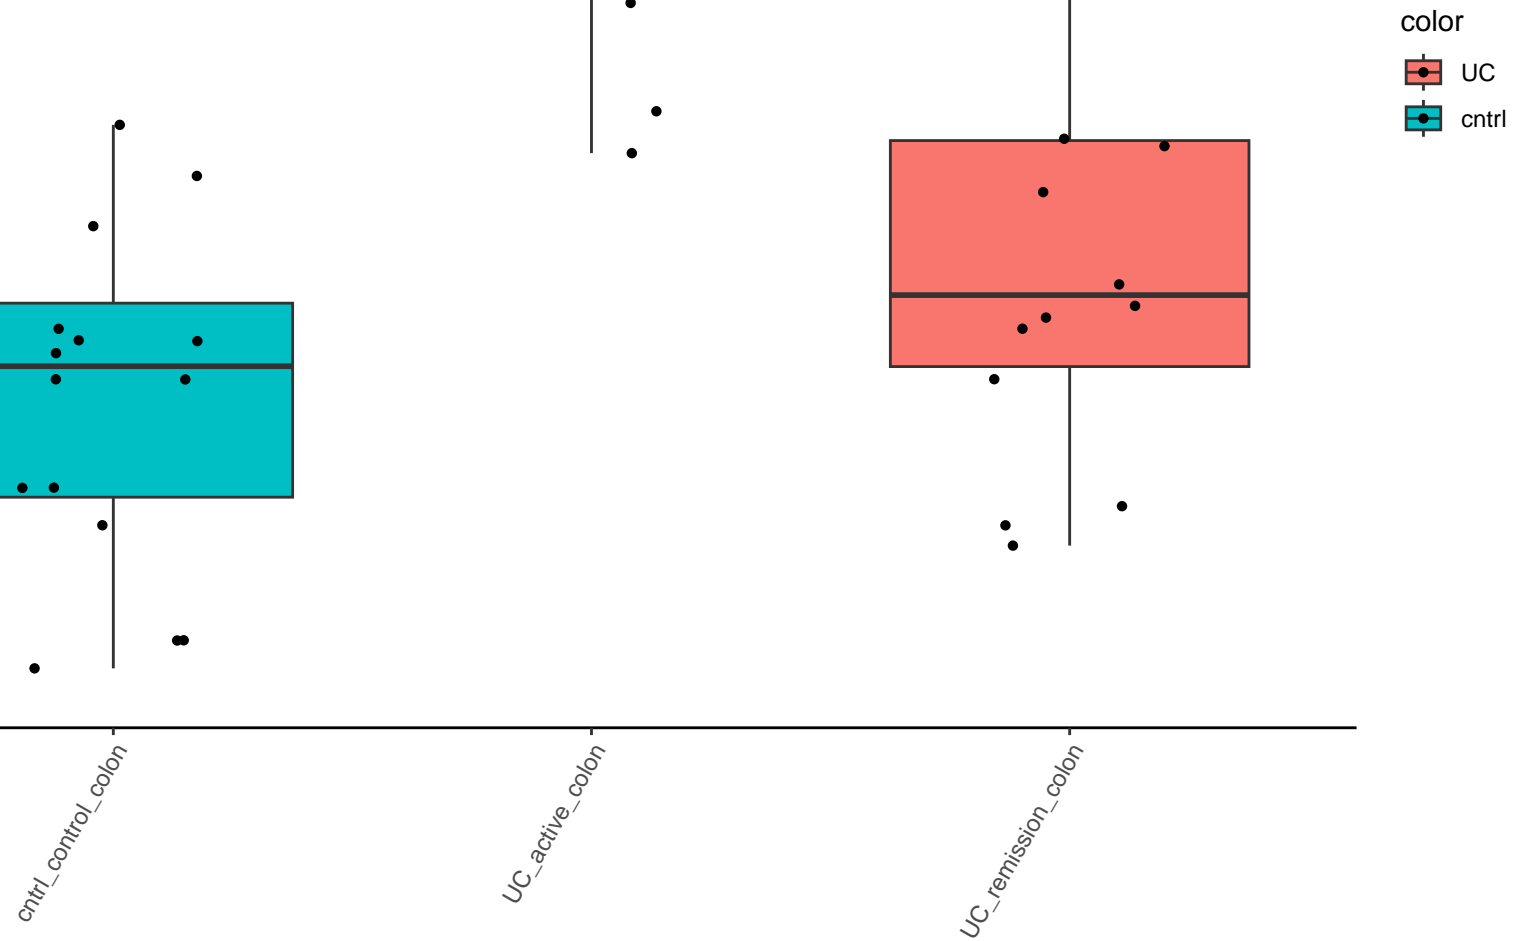

GSE48958

MIR155HG

color

UC  
cntrl

cntrl\_control\_colon

UC\_active\_colon

UC\_inactive\_colon

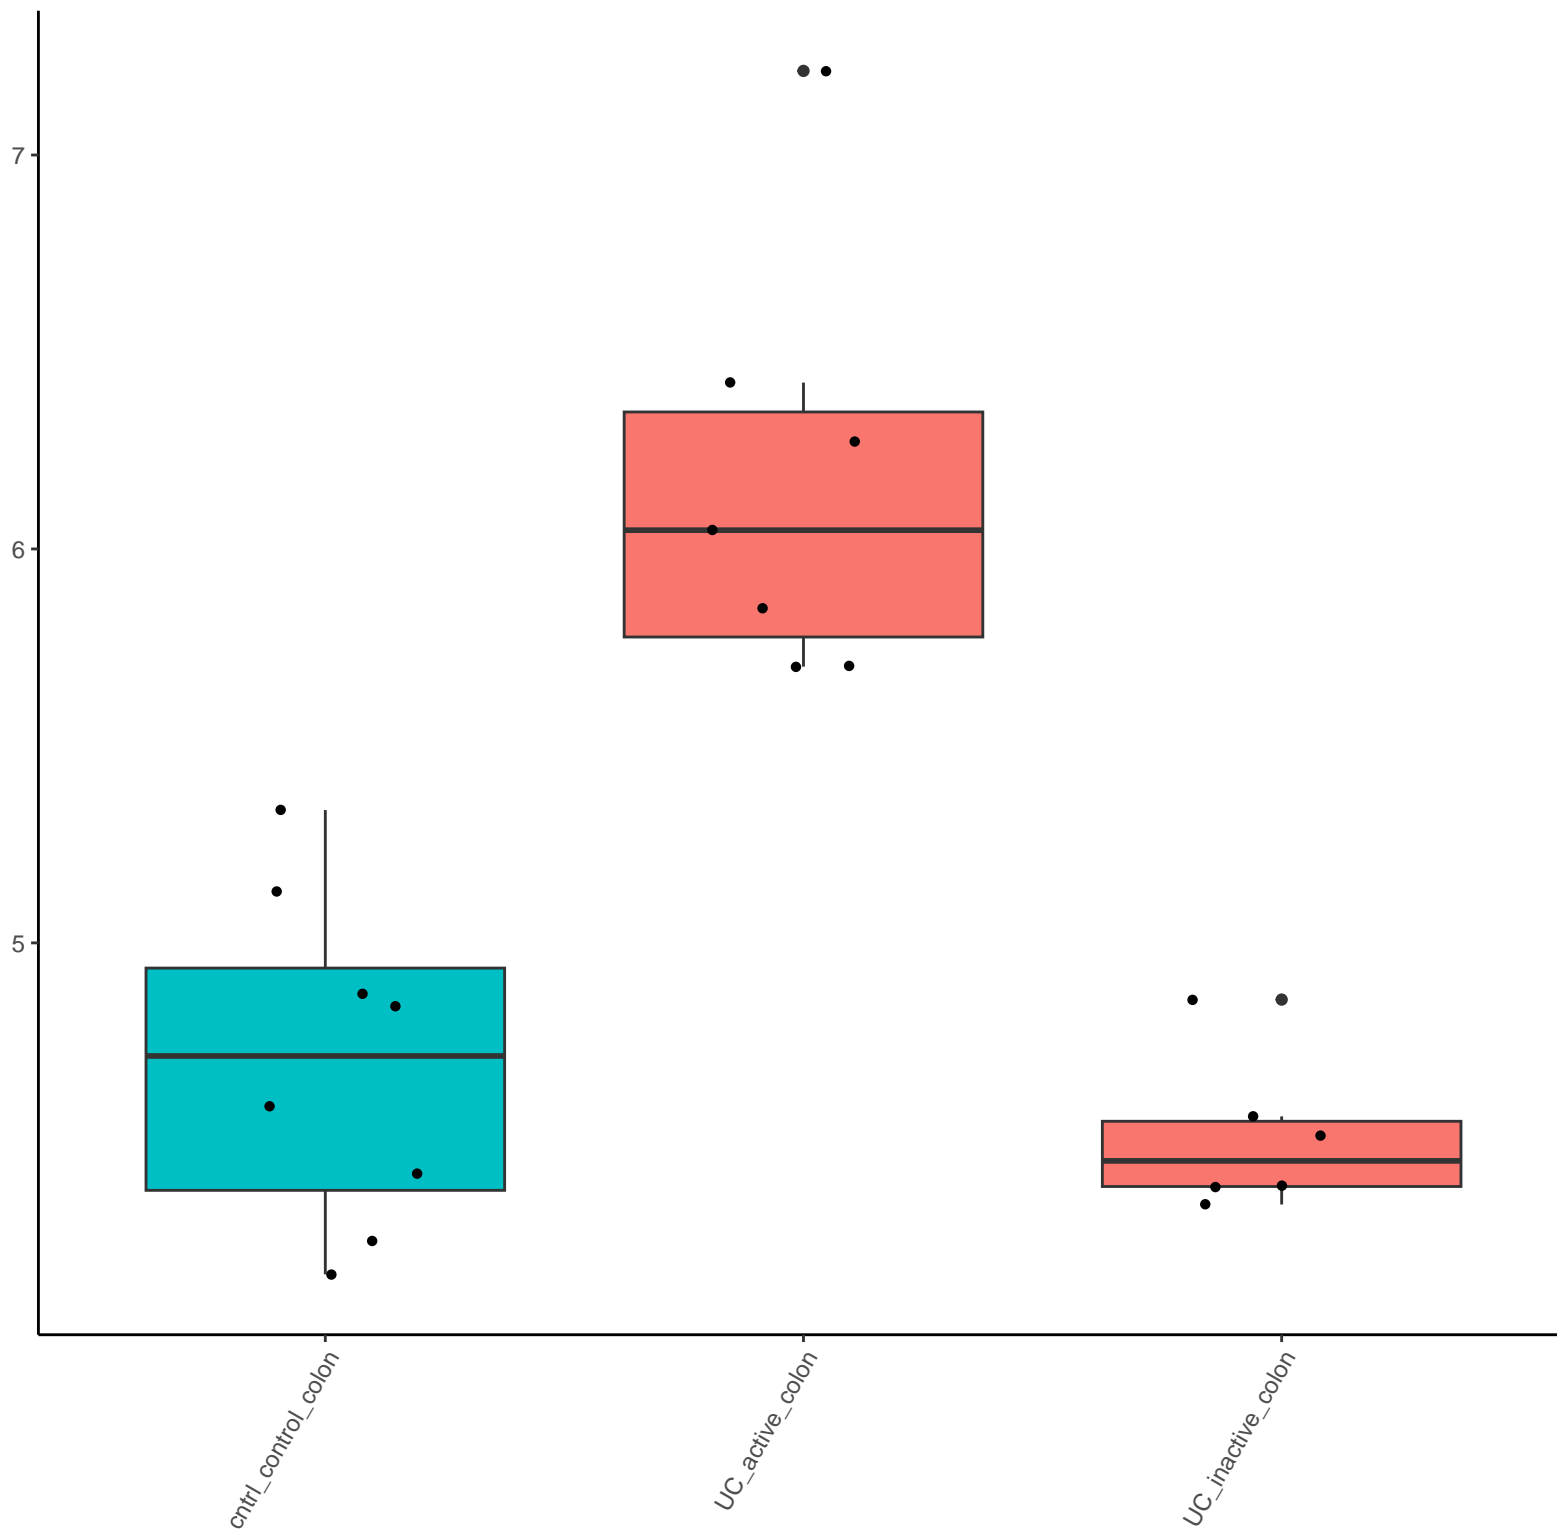

GSE9452

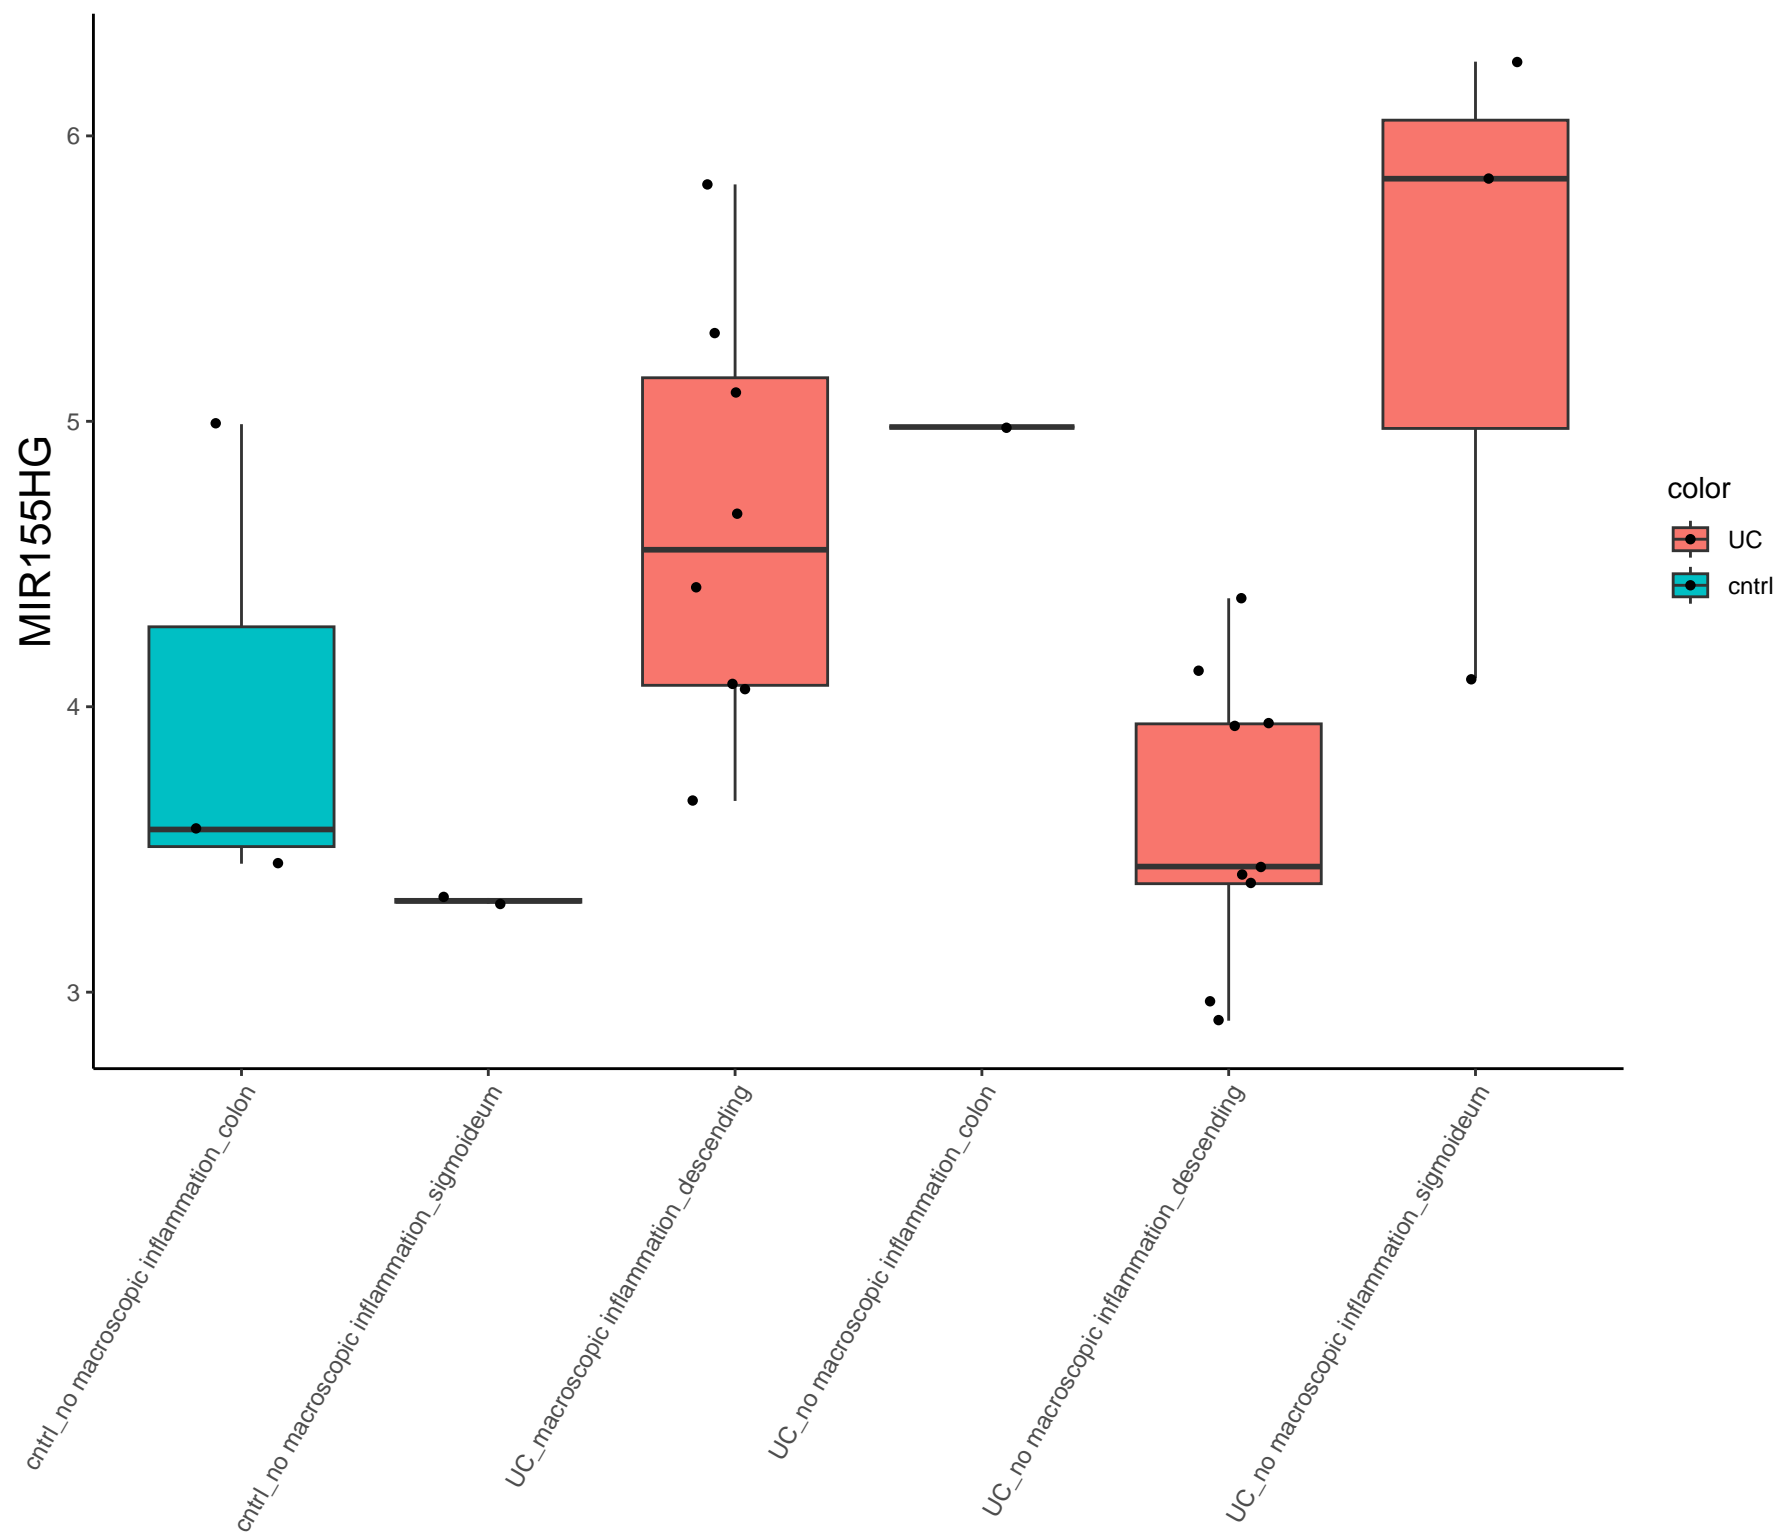

GSE128682

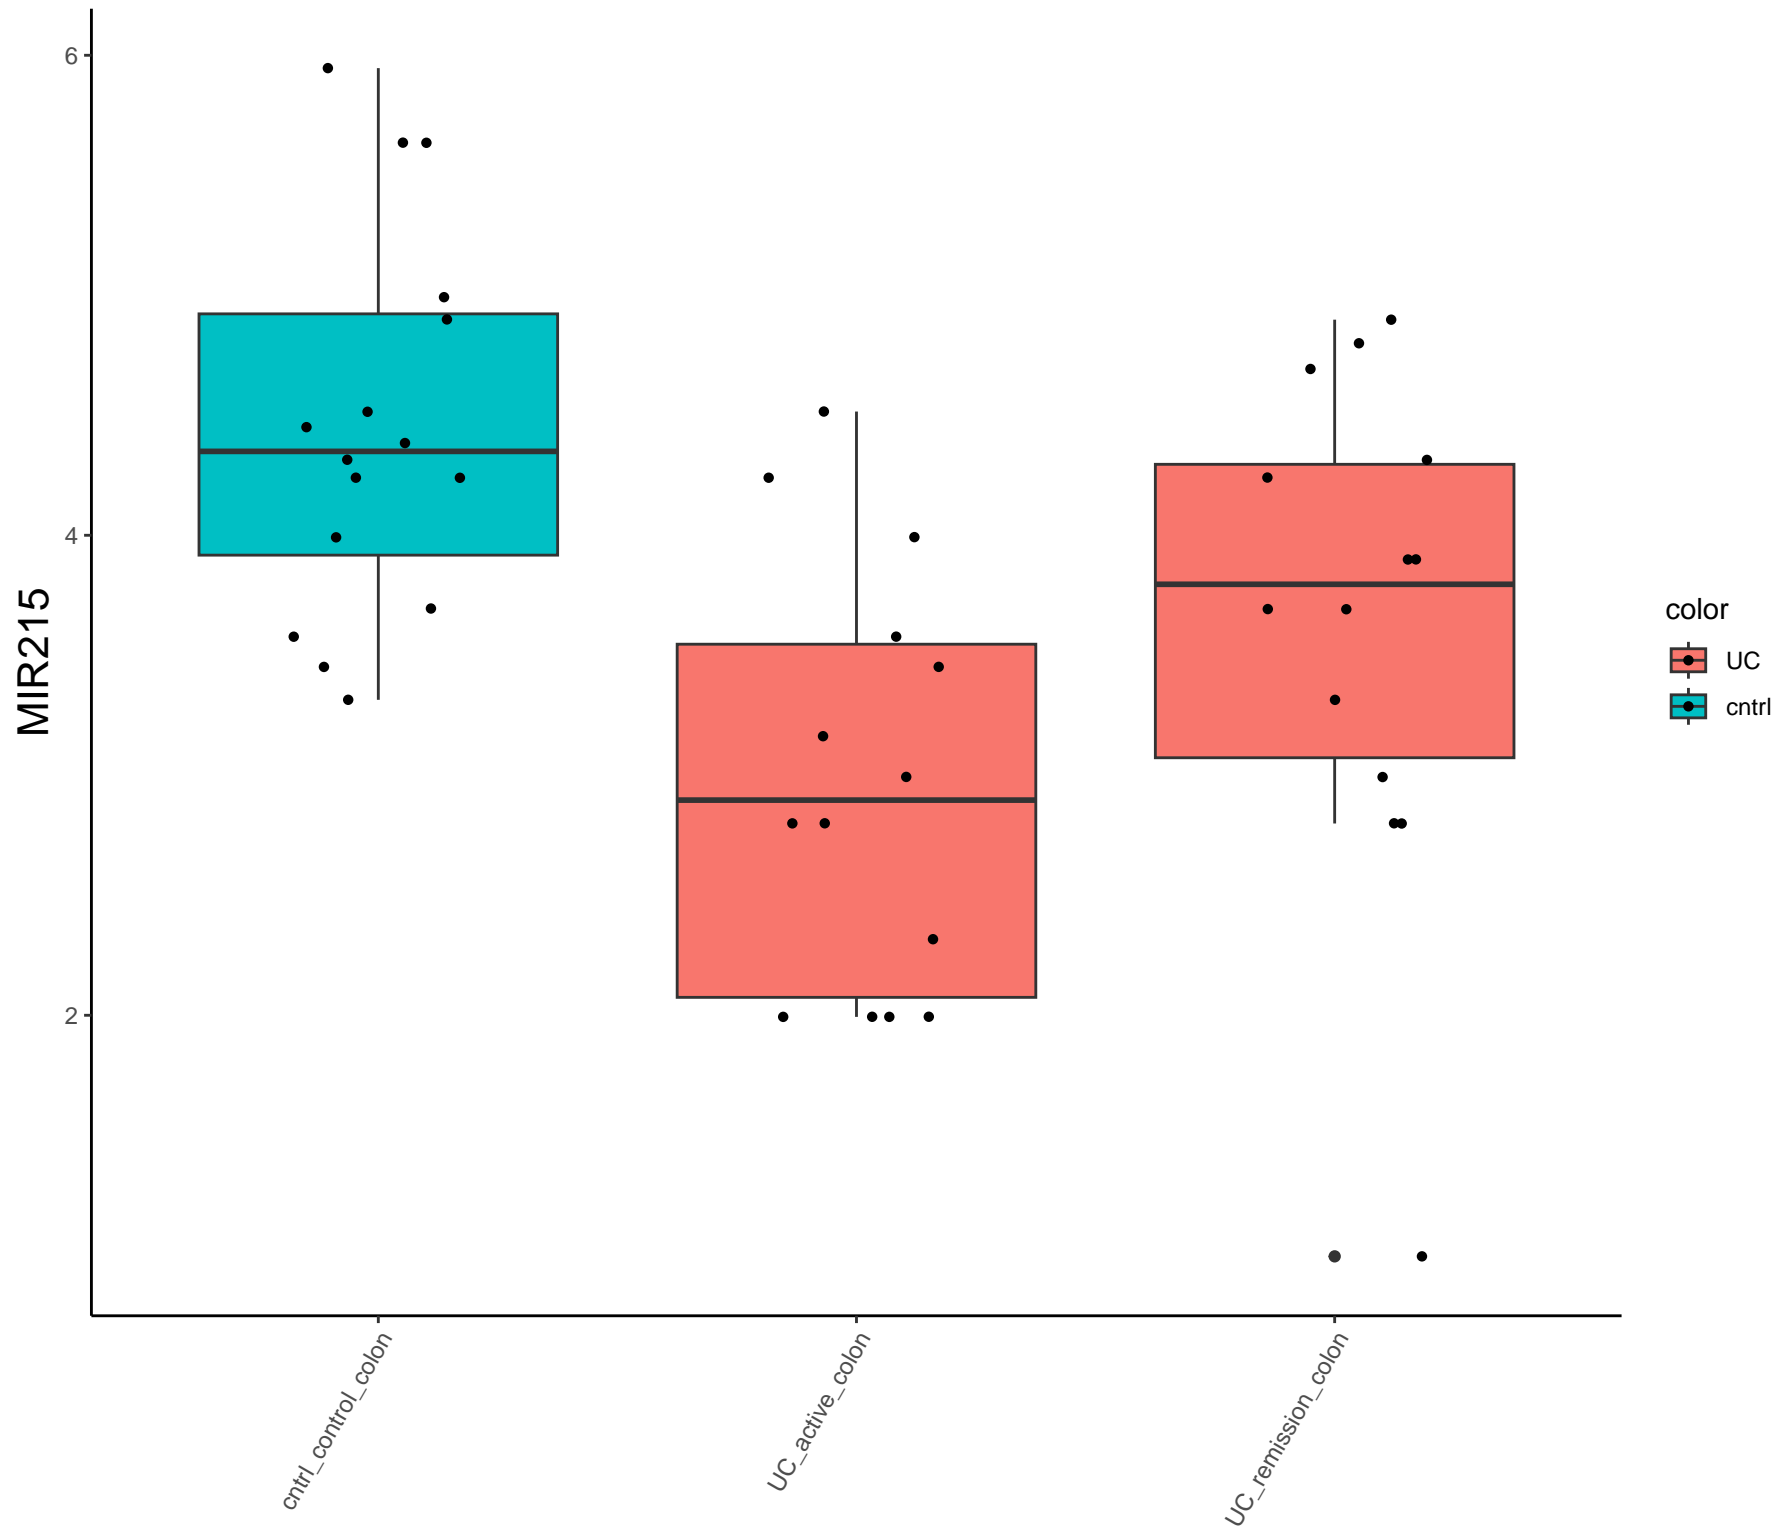

GSE59071

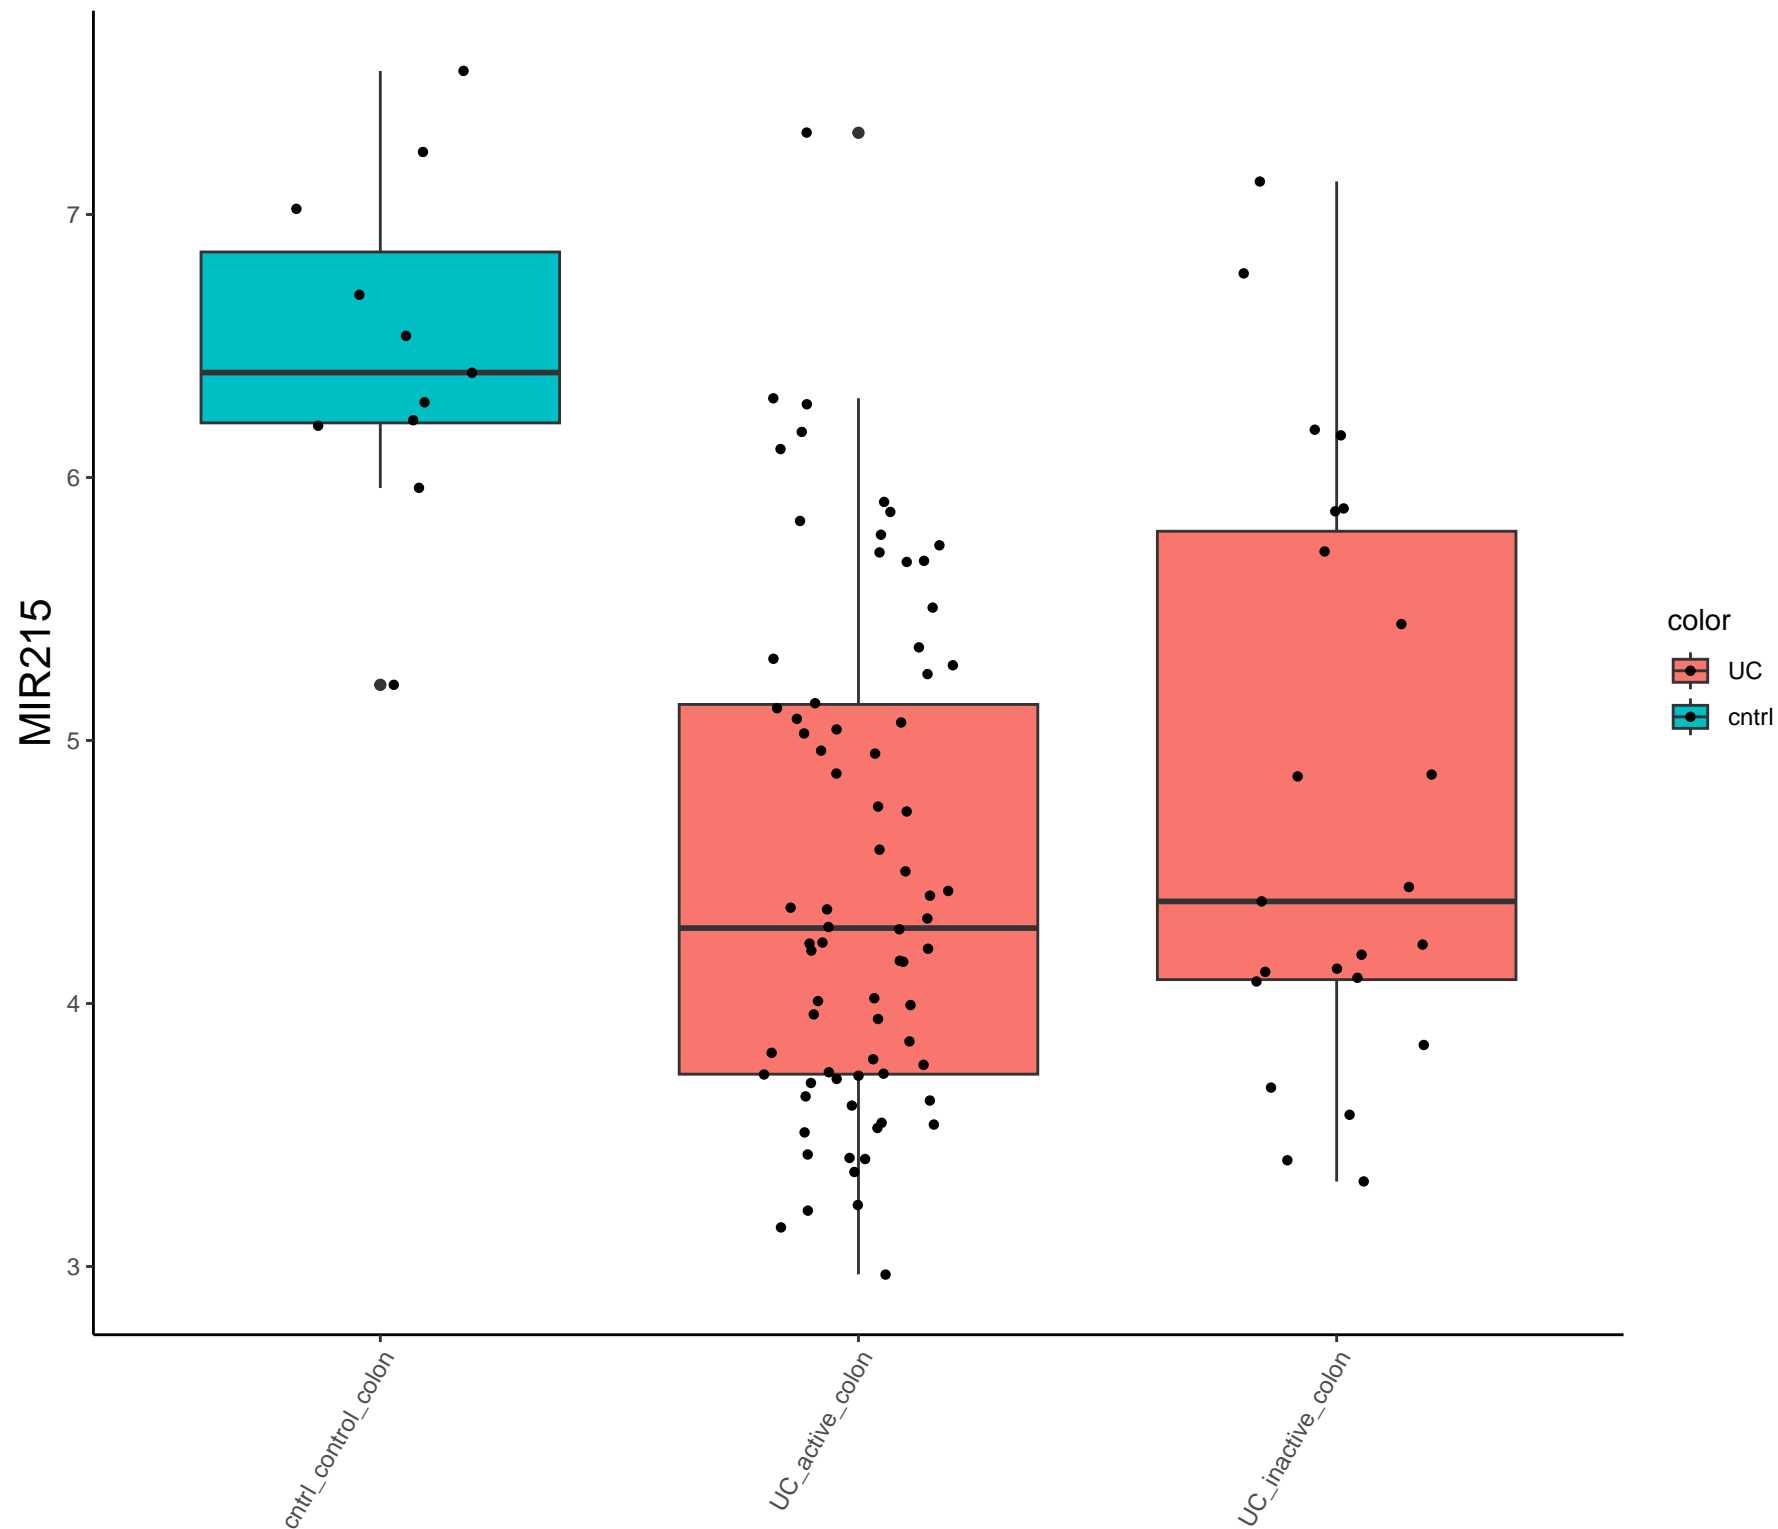

GSE128682

MIR3936HG

cntrl\_control\_colon

UC\_active\_colon

UC\_remission\_colon

color

UC  
cntrl

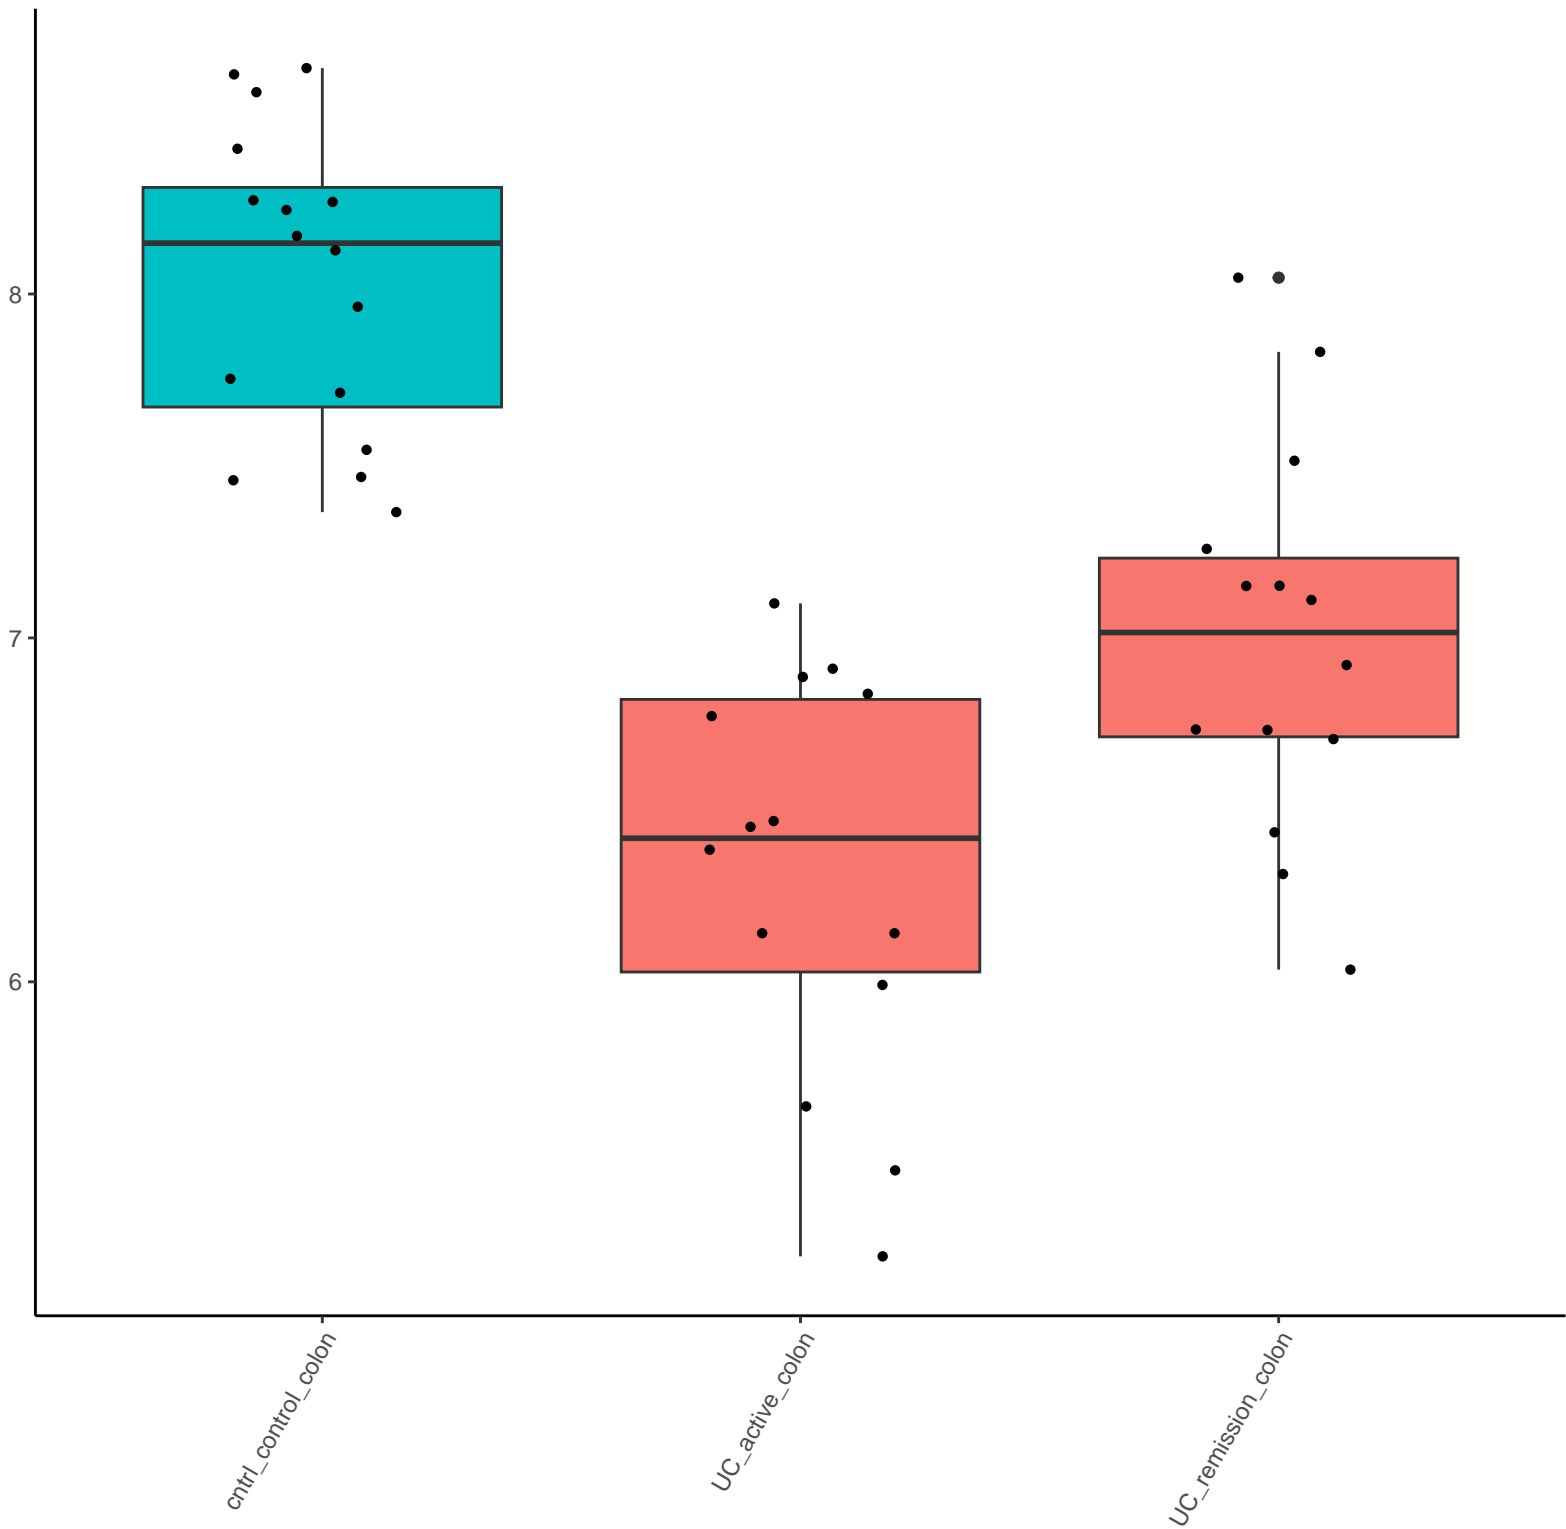

GSE38713

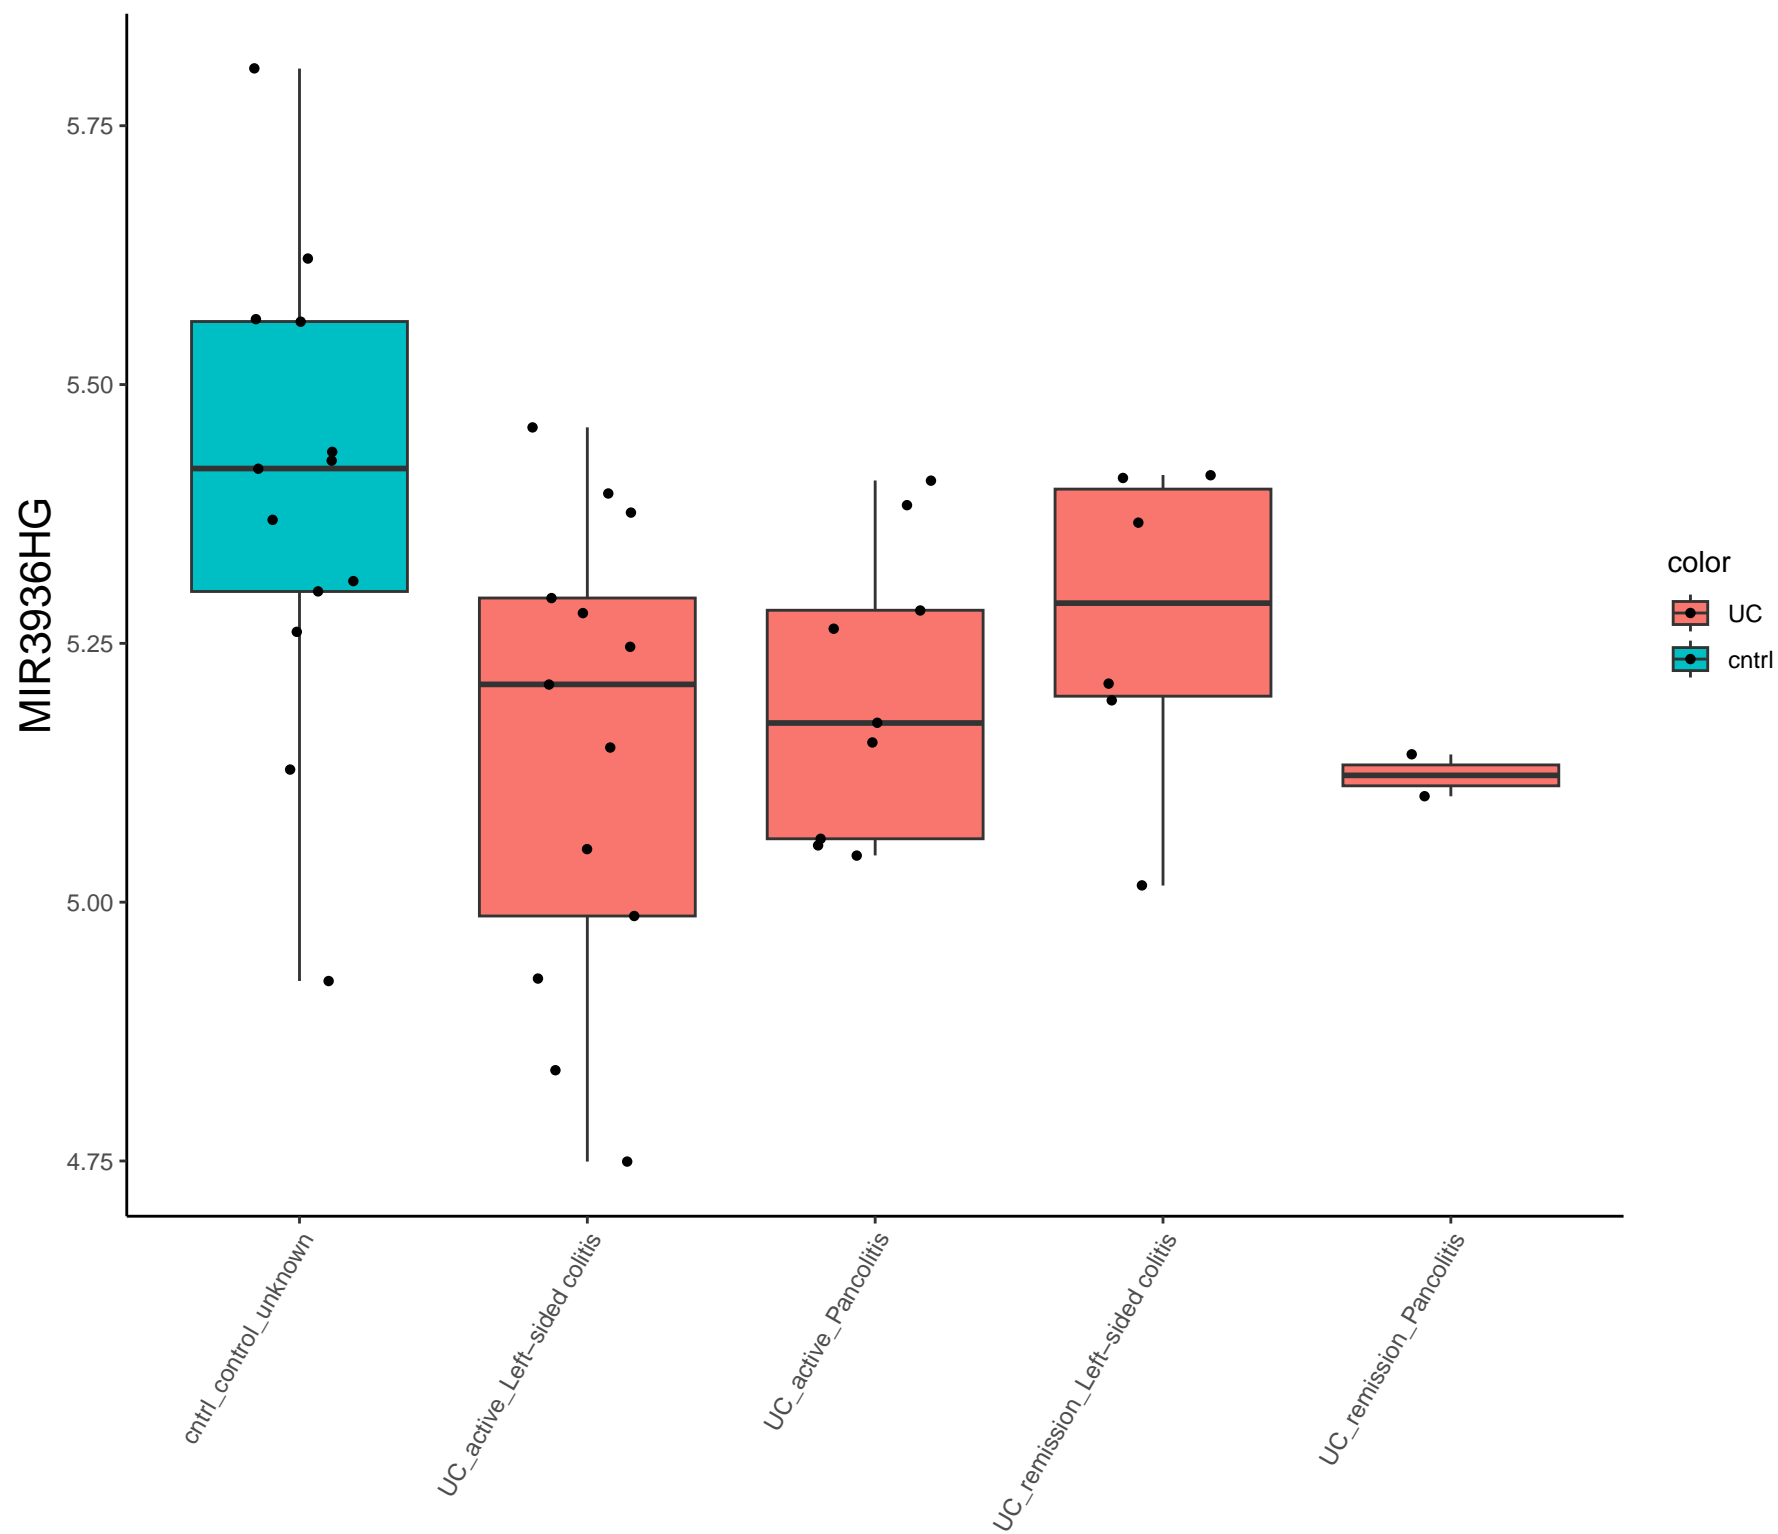

GSE9452

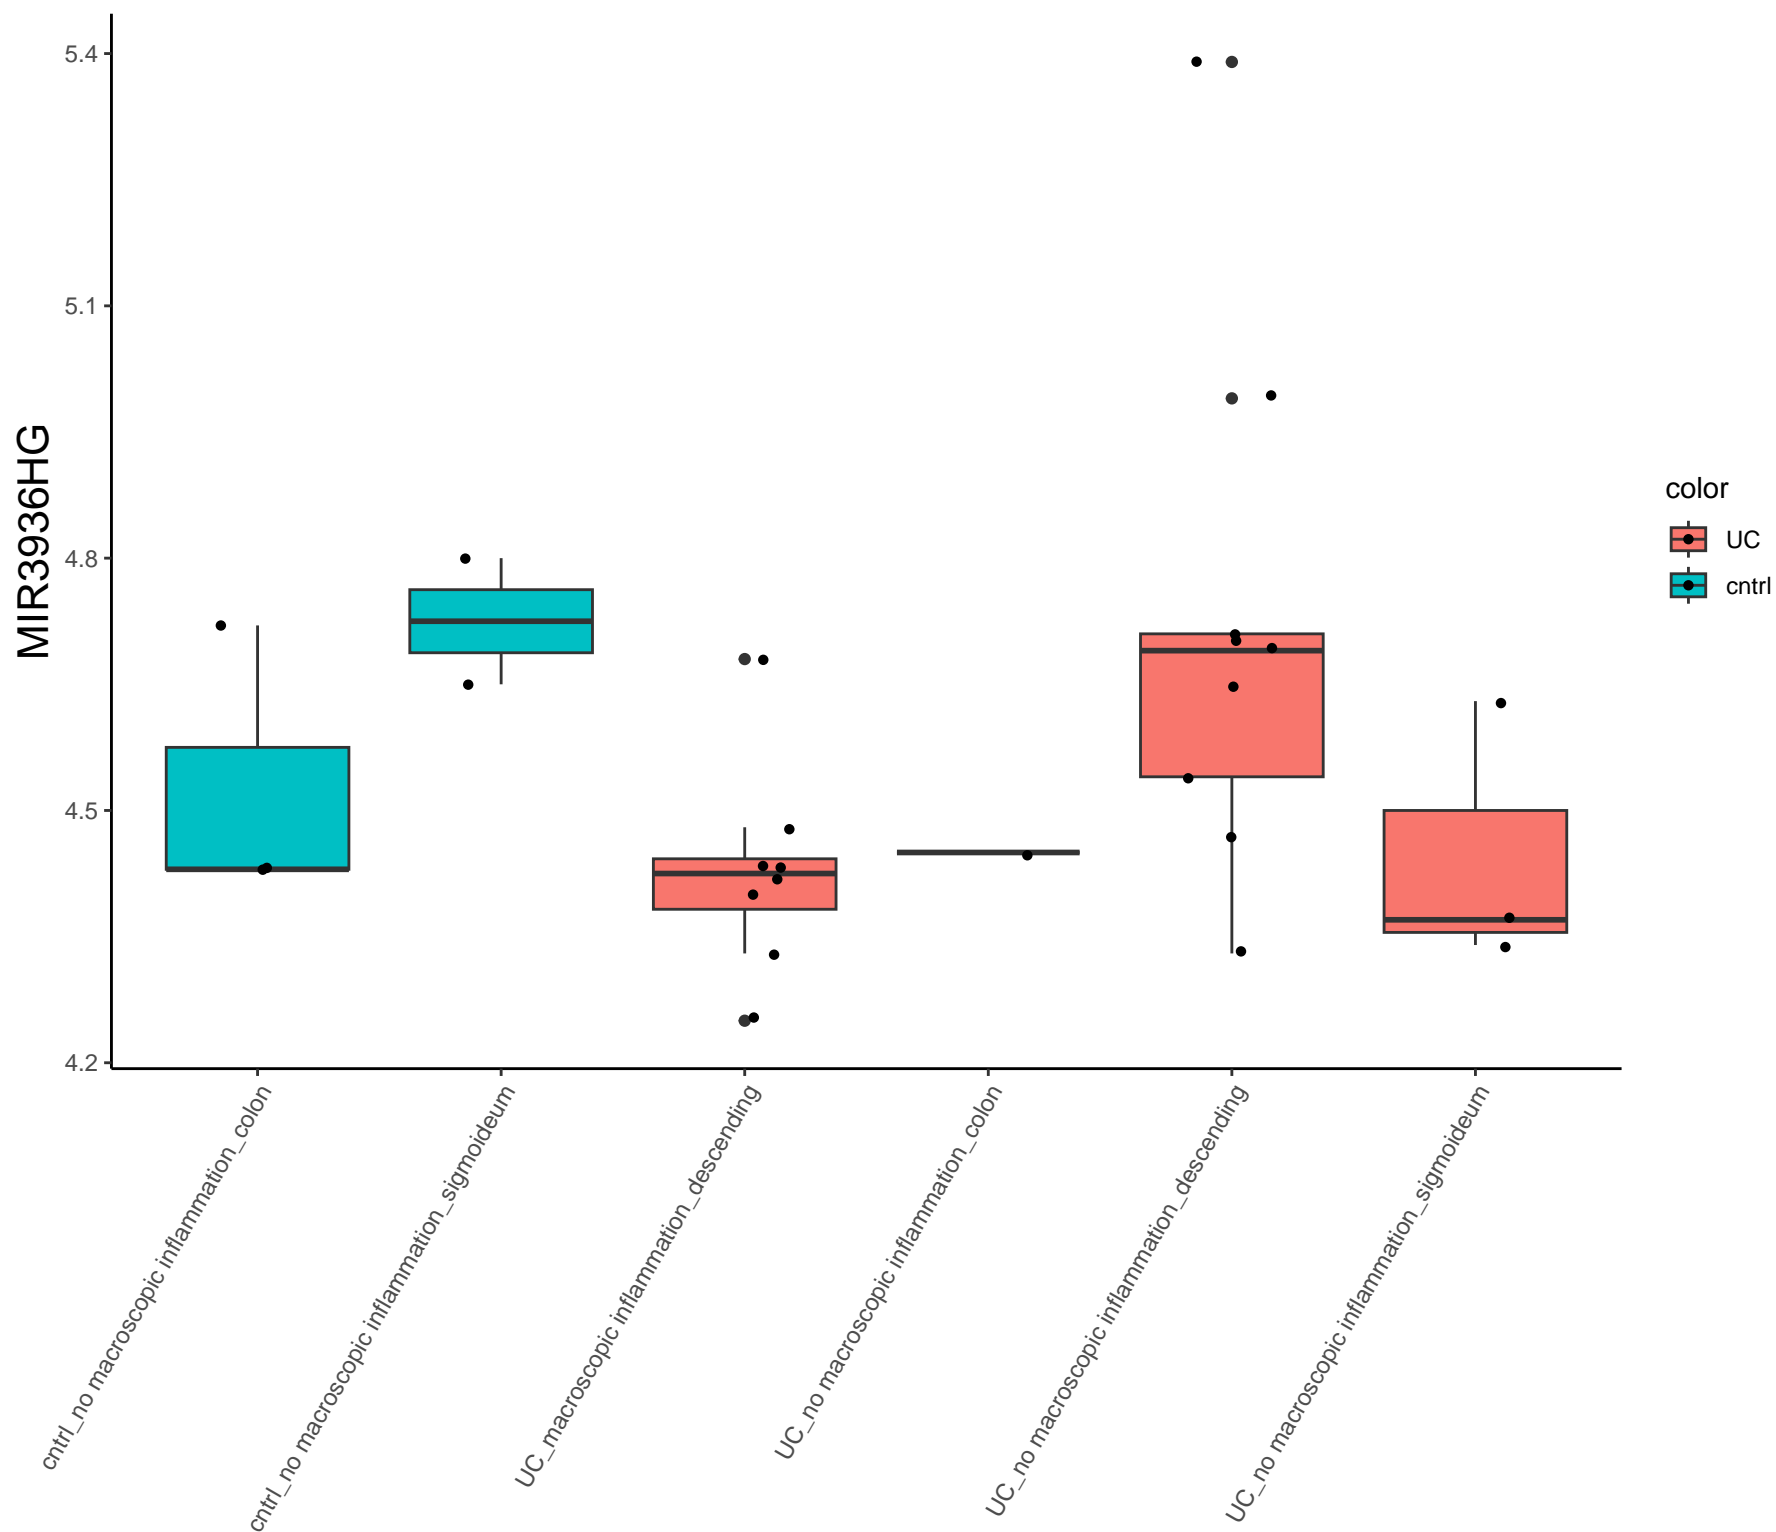



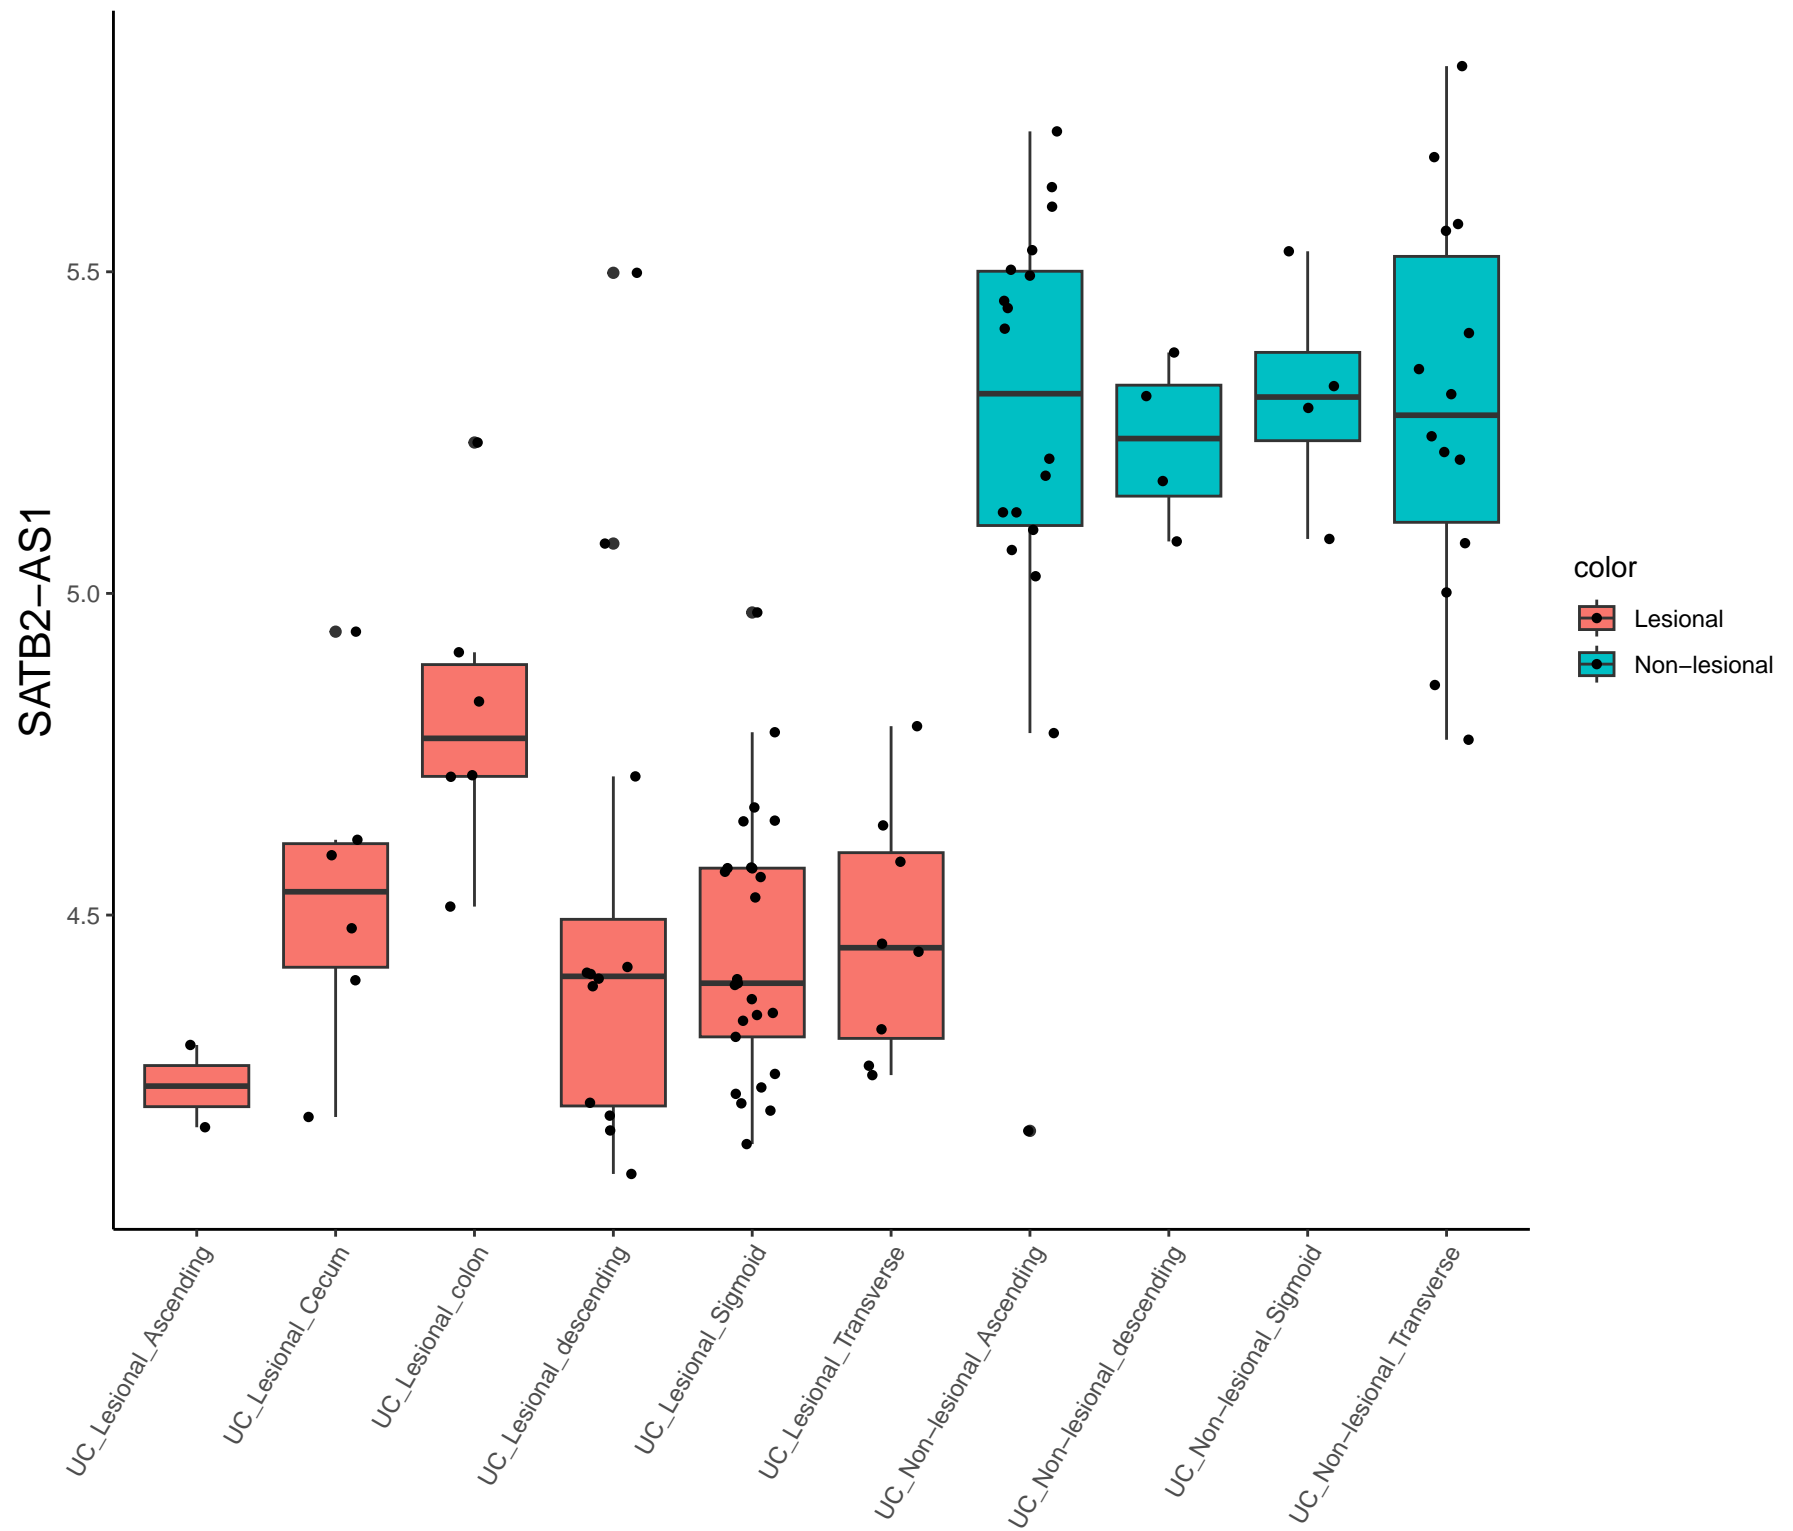

GSE128682

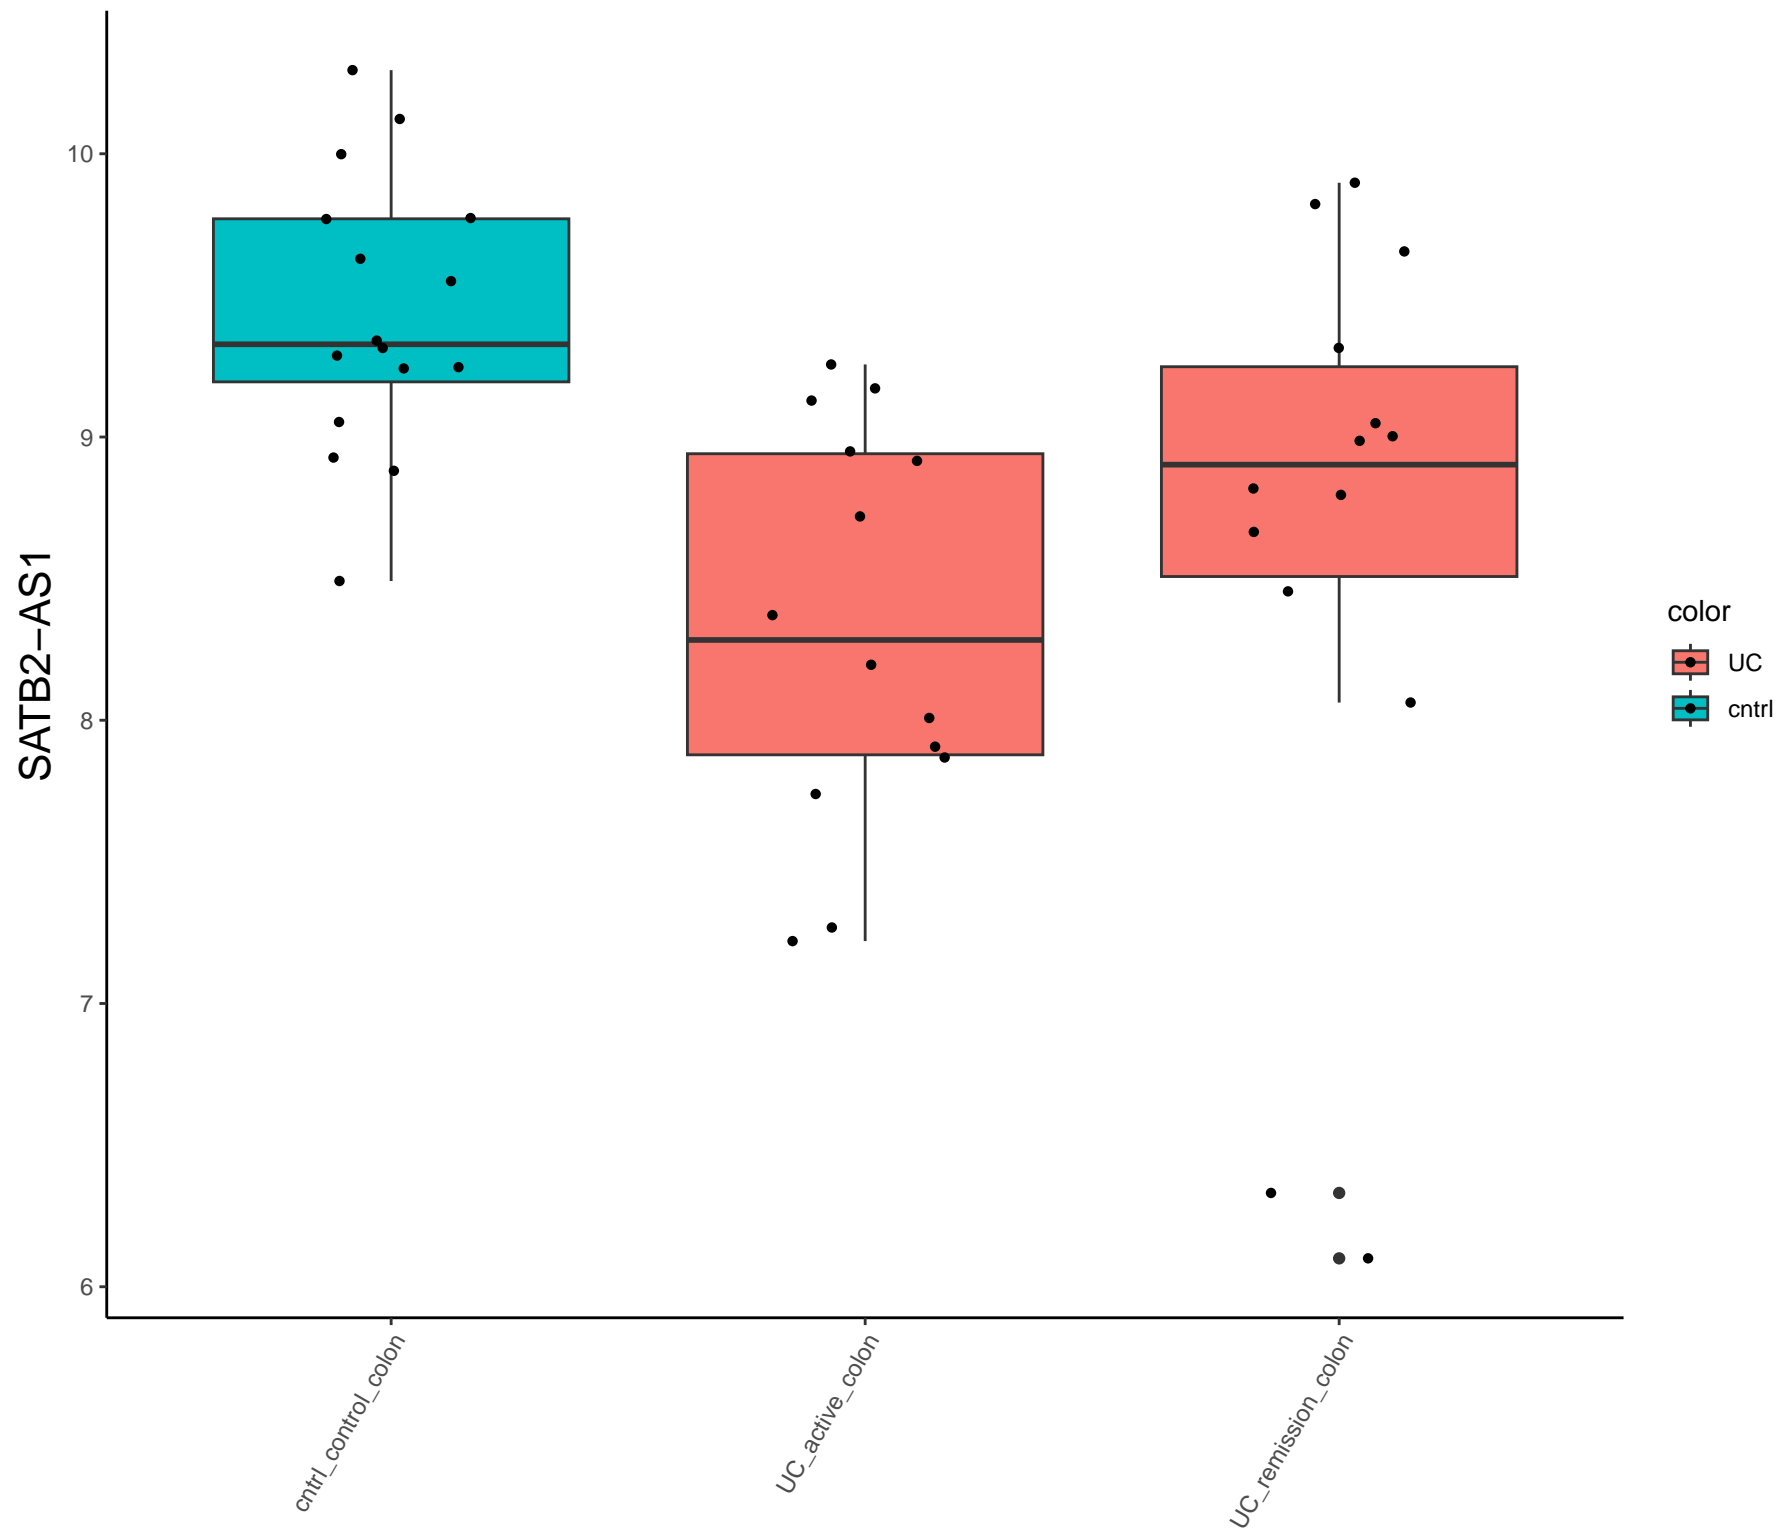

GSE38713

SATB2-AS1

cntrl\_control\_unknown

UC\_active\_Left-sided colitis

UC\_active\_Pancolitis

UC\_remission\_Left-sided colitis

UC\_remission\_Pancolitis

color

UC  
cntrl

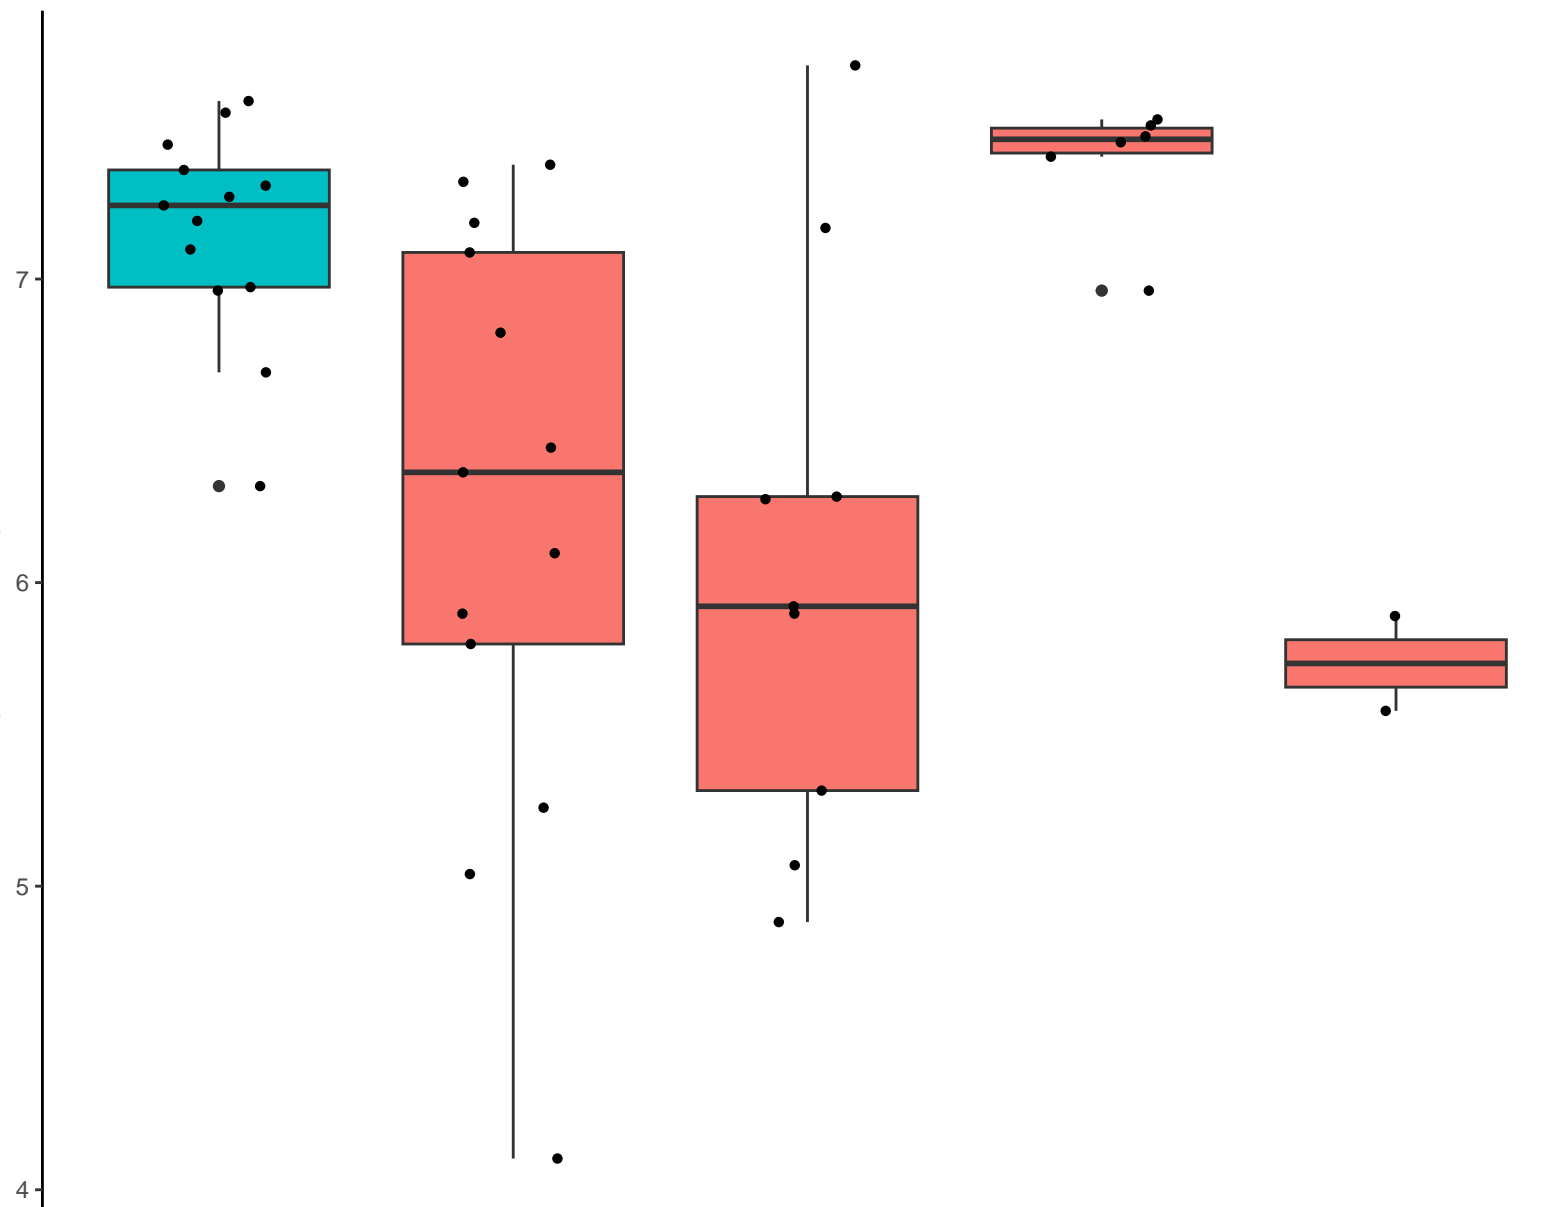

GSE48634

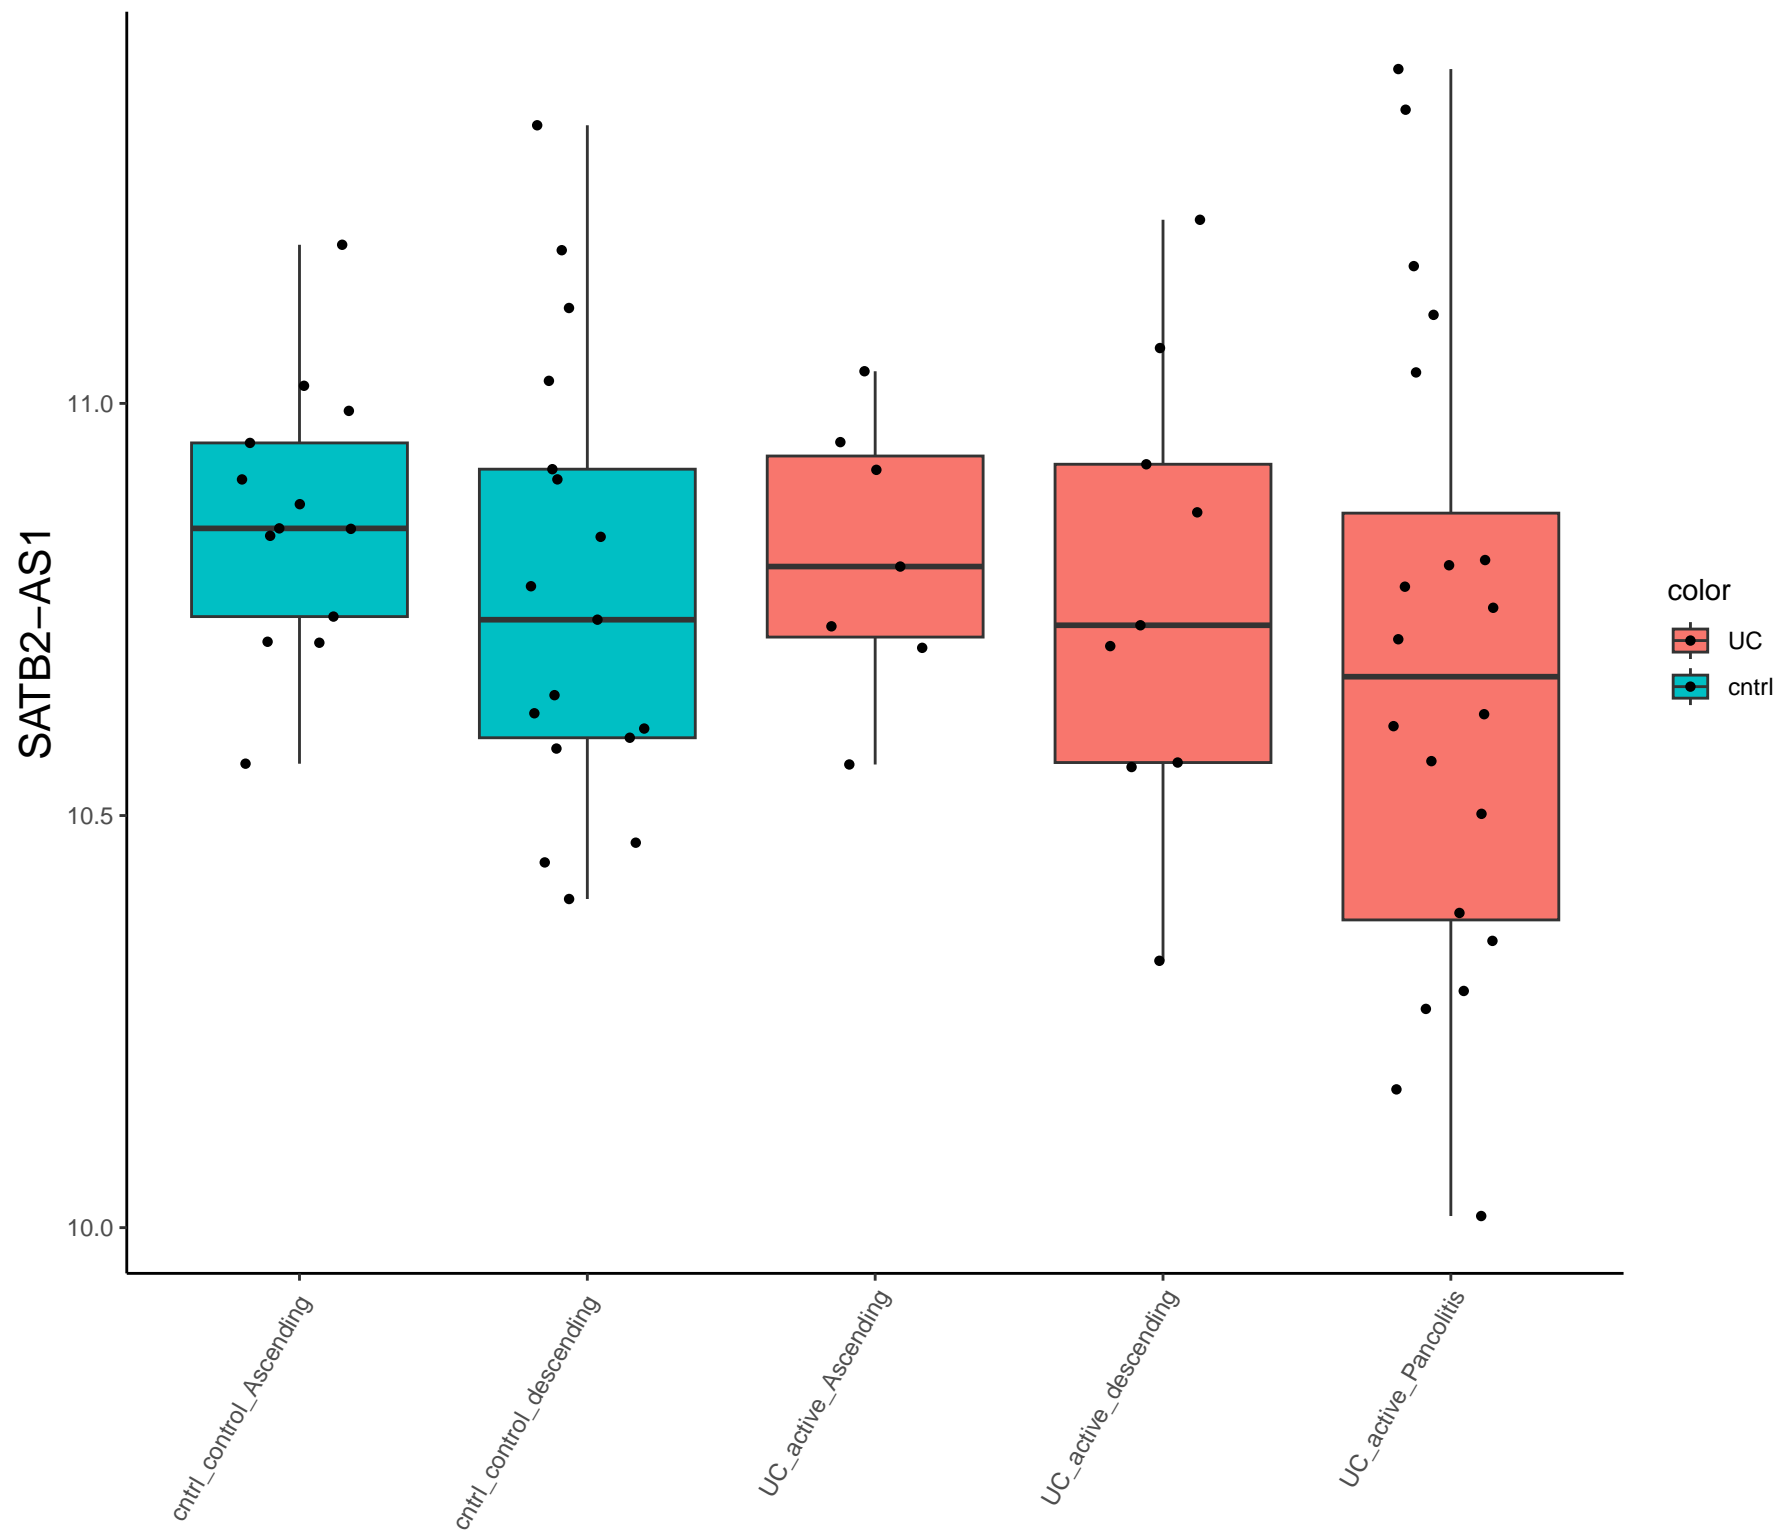

GSE48958

SATB2-AS1

color

UC

cntrl

cntrl\_control\_colon

UC\_active\_colon

UC\_inactive\_colon

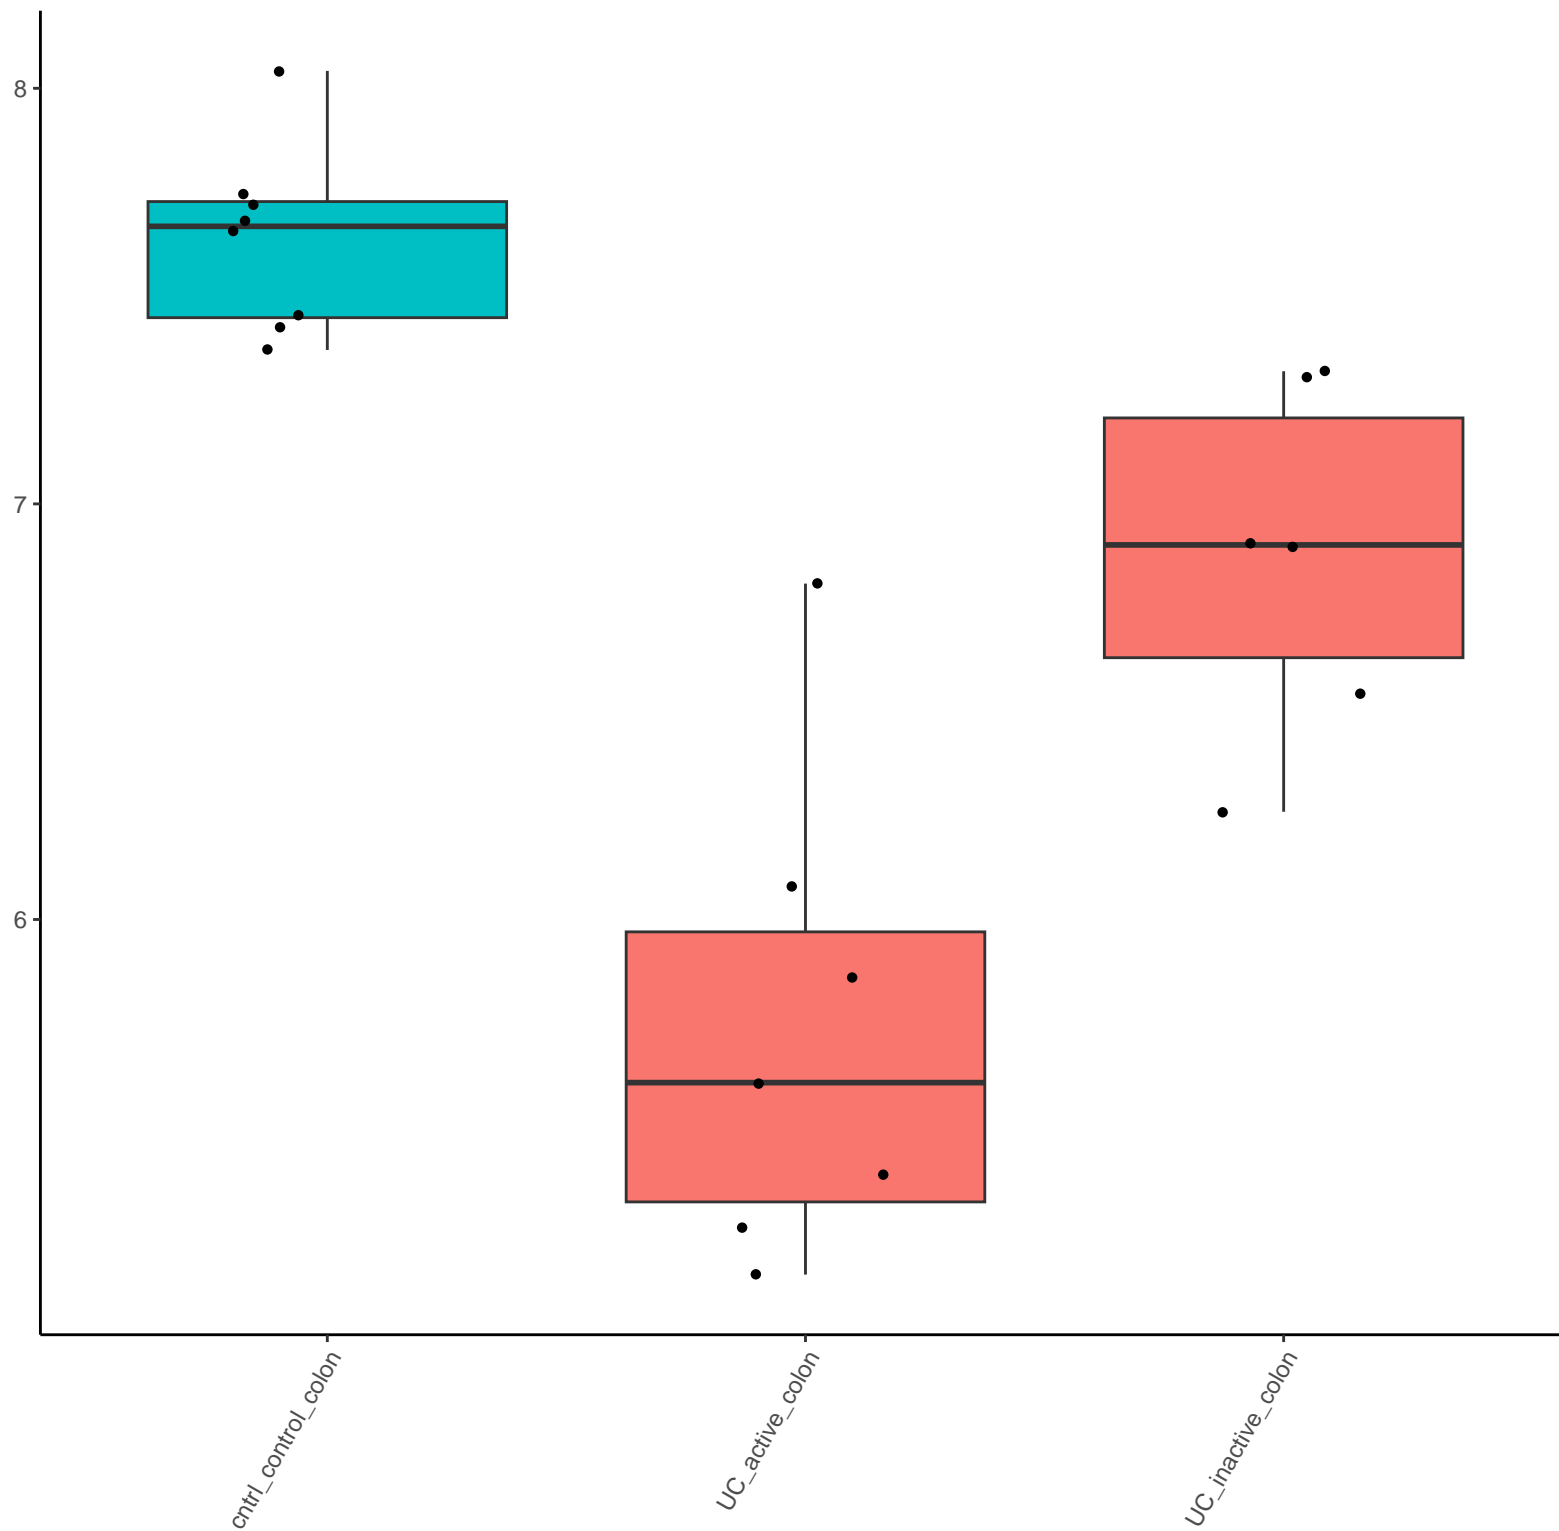

GSE53306

SATB2-AS1

color  
UC  
cntrl

cntrl\_control\_colon

UC\_active\_colon

UC\_inactive\_colon

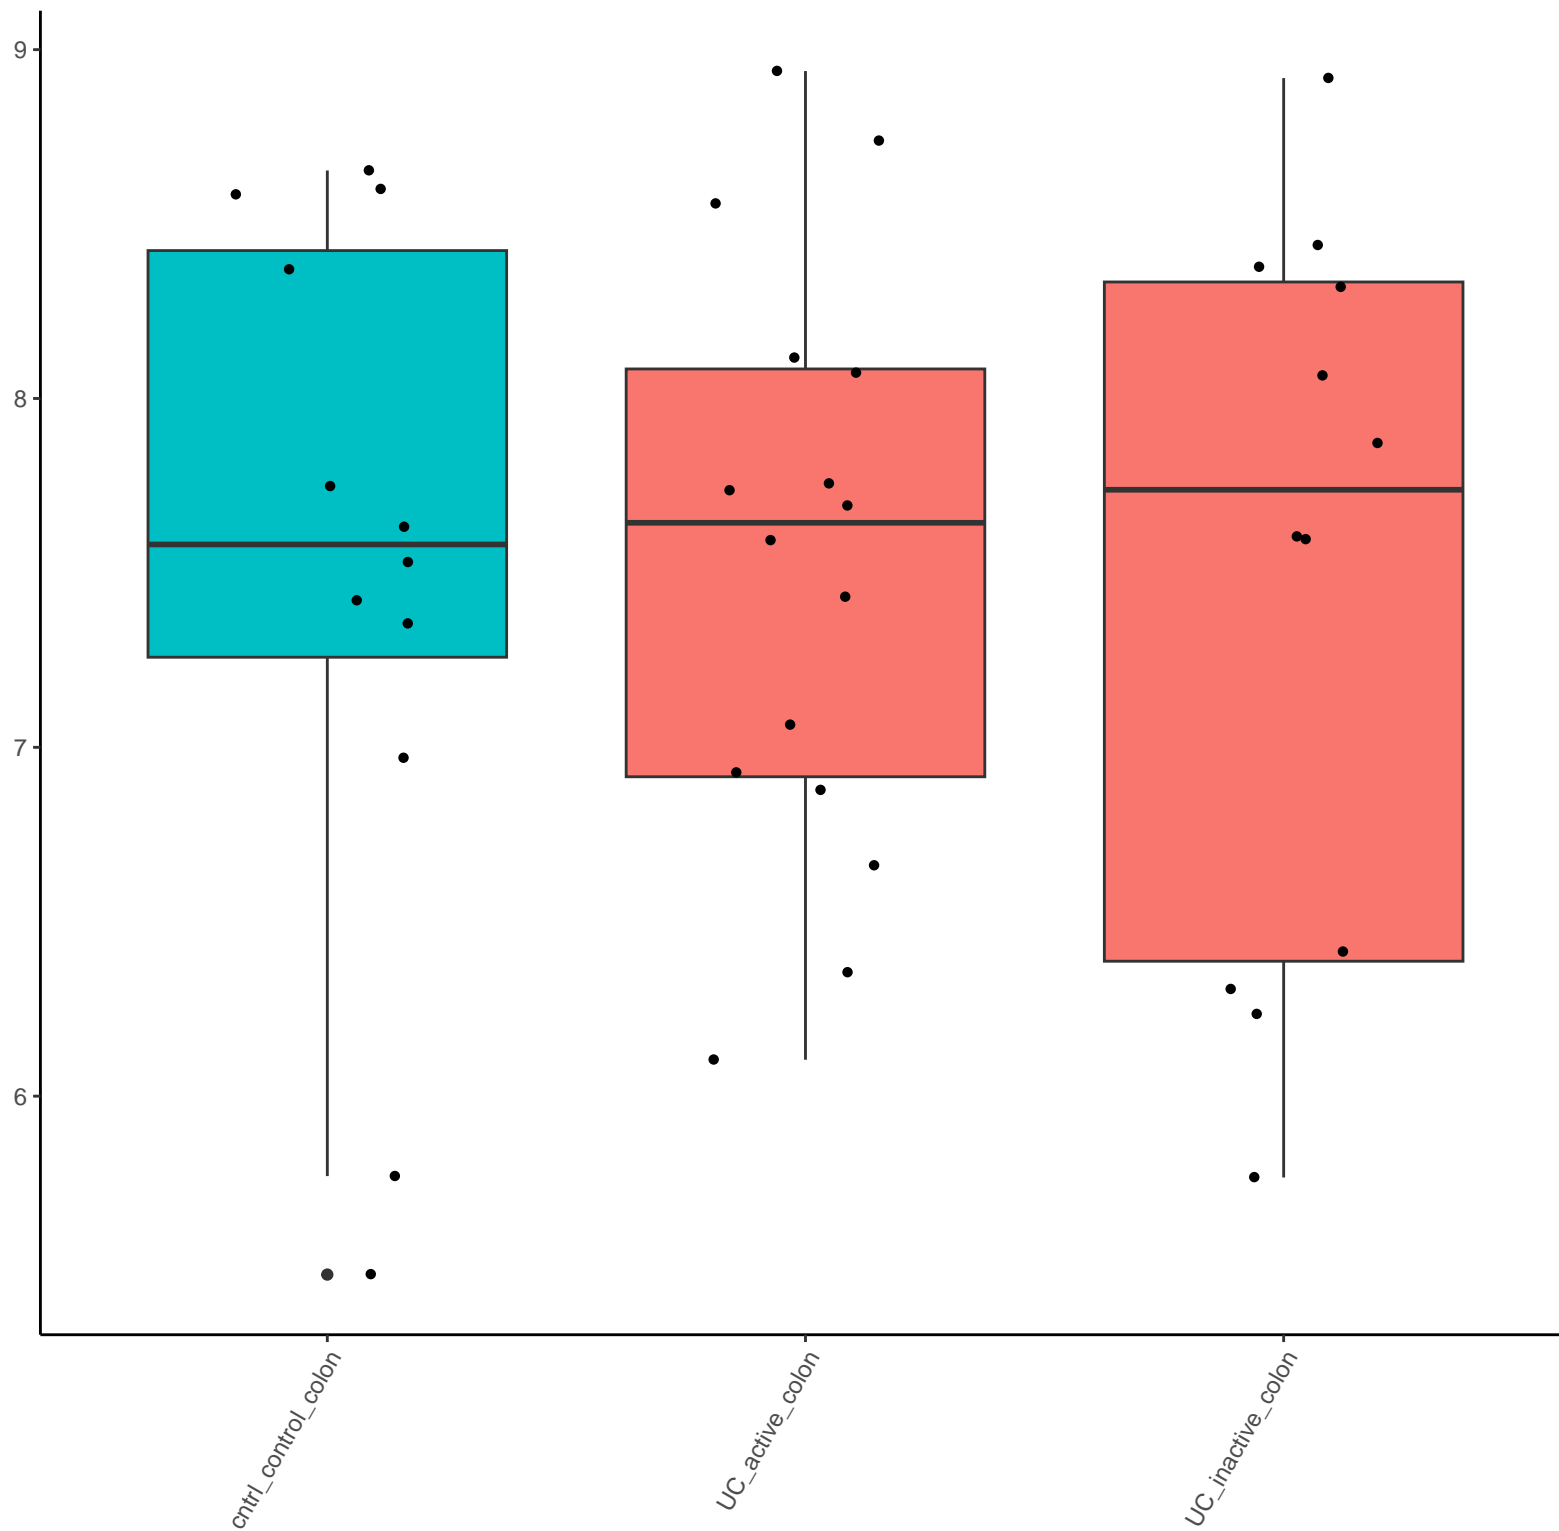

GSE59071

SATB2-AS1

cntrl\_control\_colon

UC\_active\_colon

UC\_inactive\_colon

color

UC  
cntrl

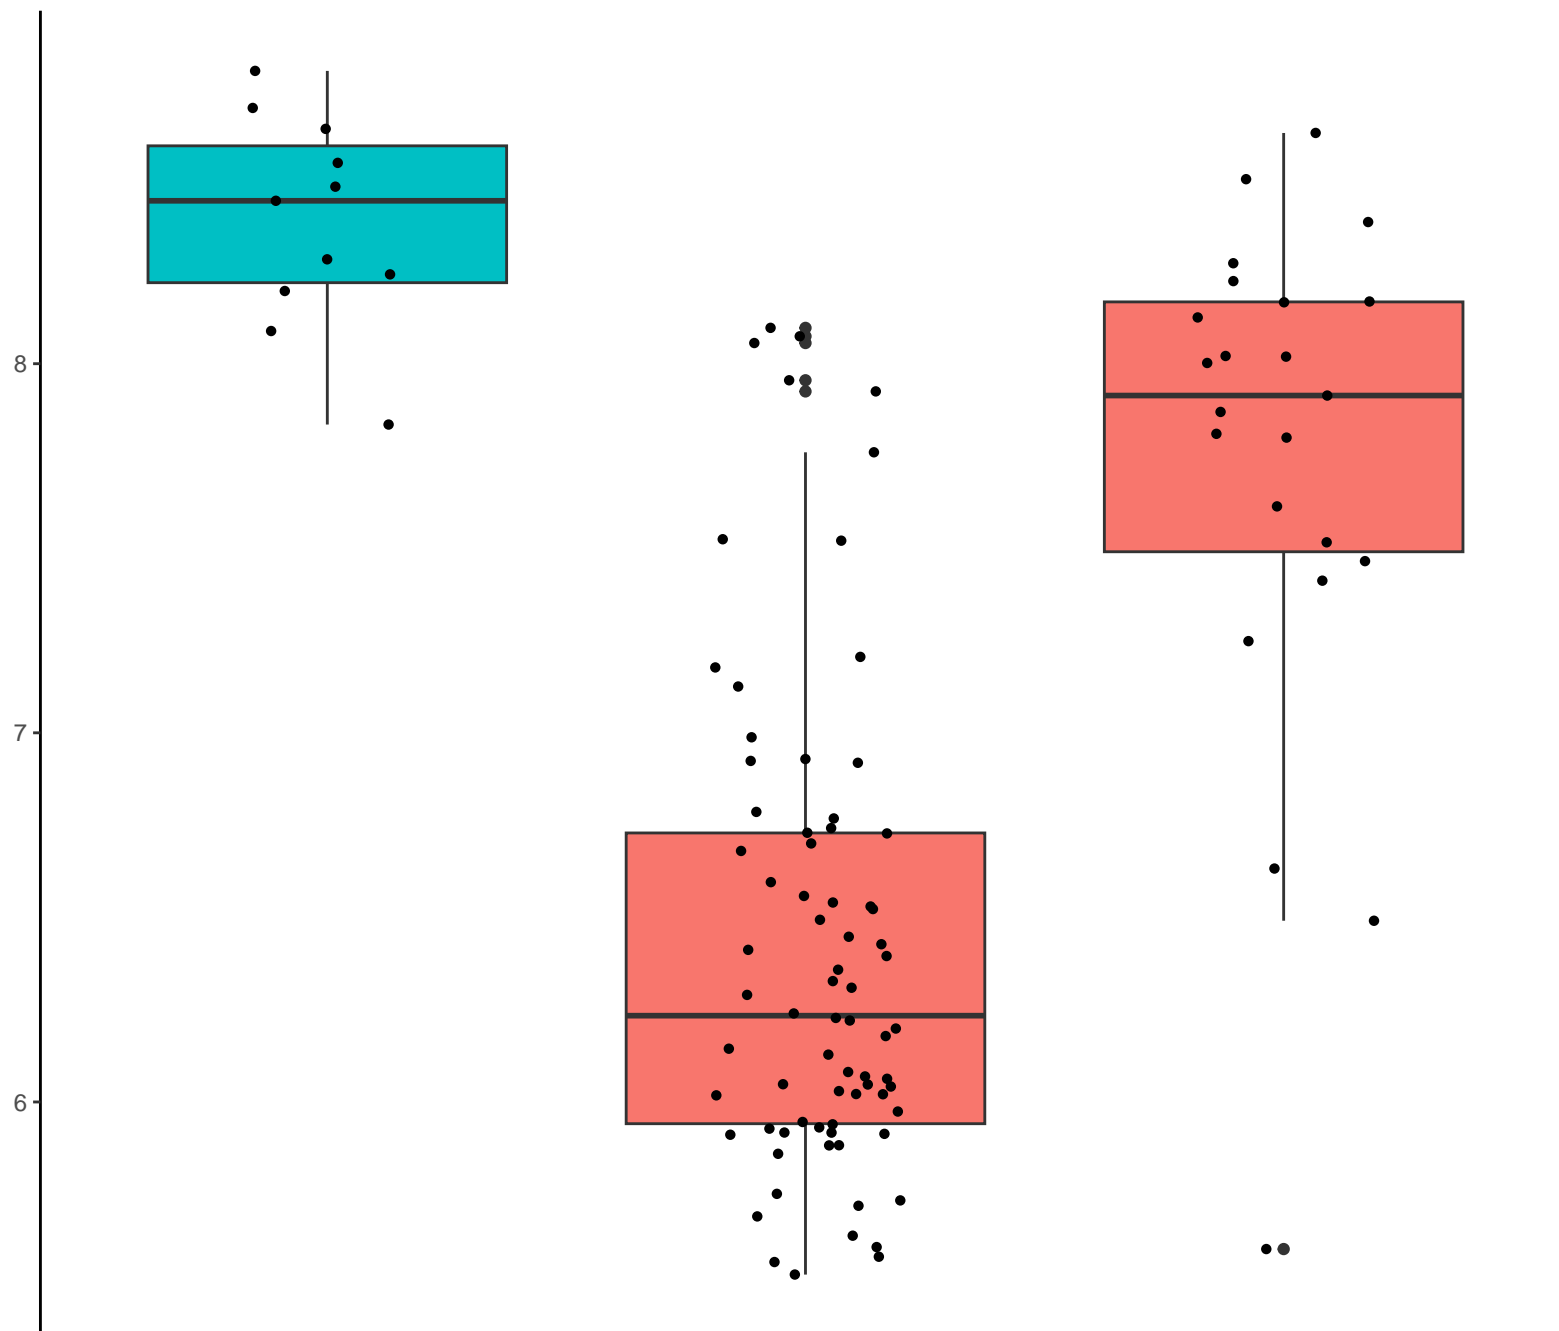

GSE9452

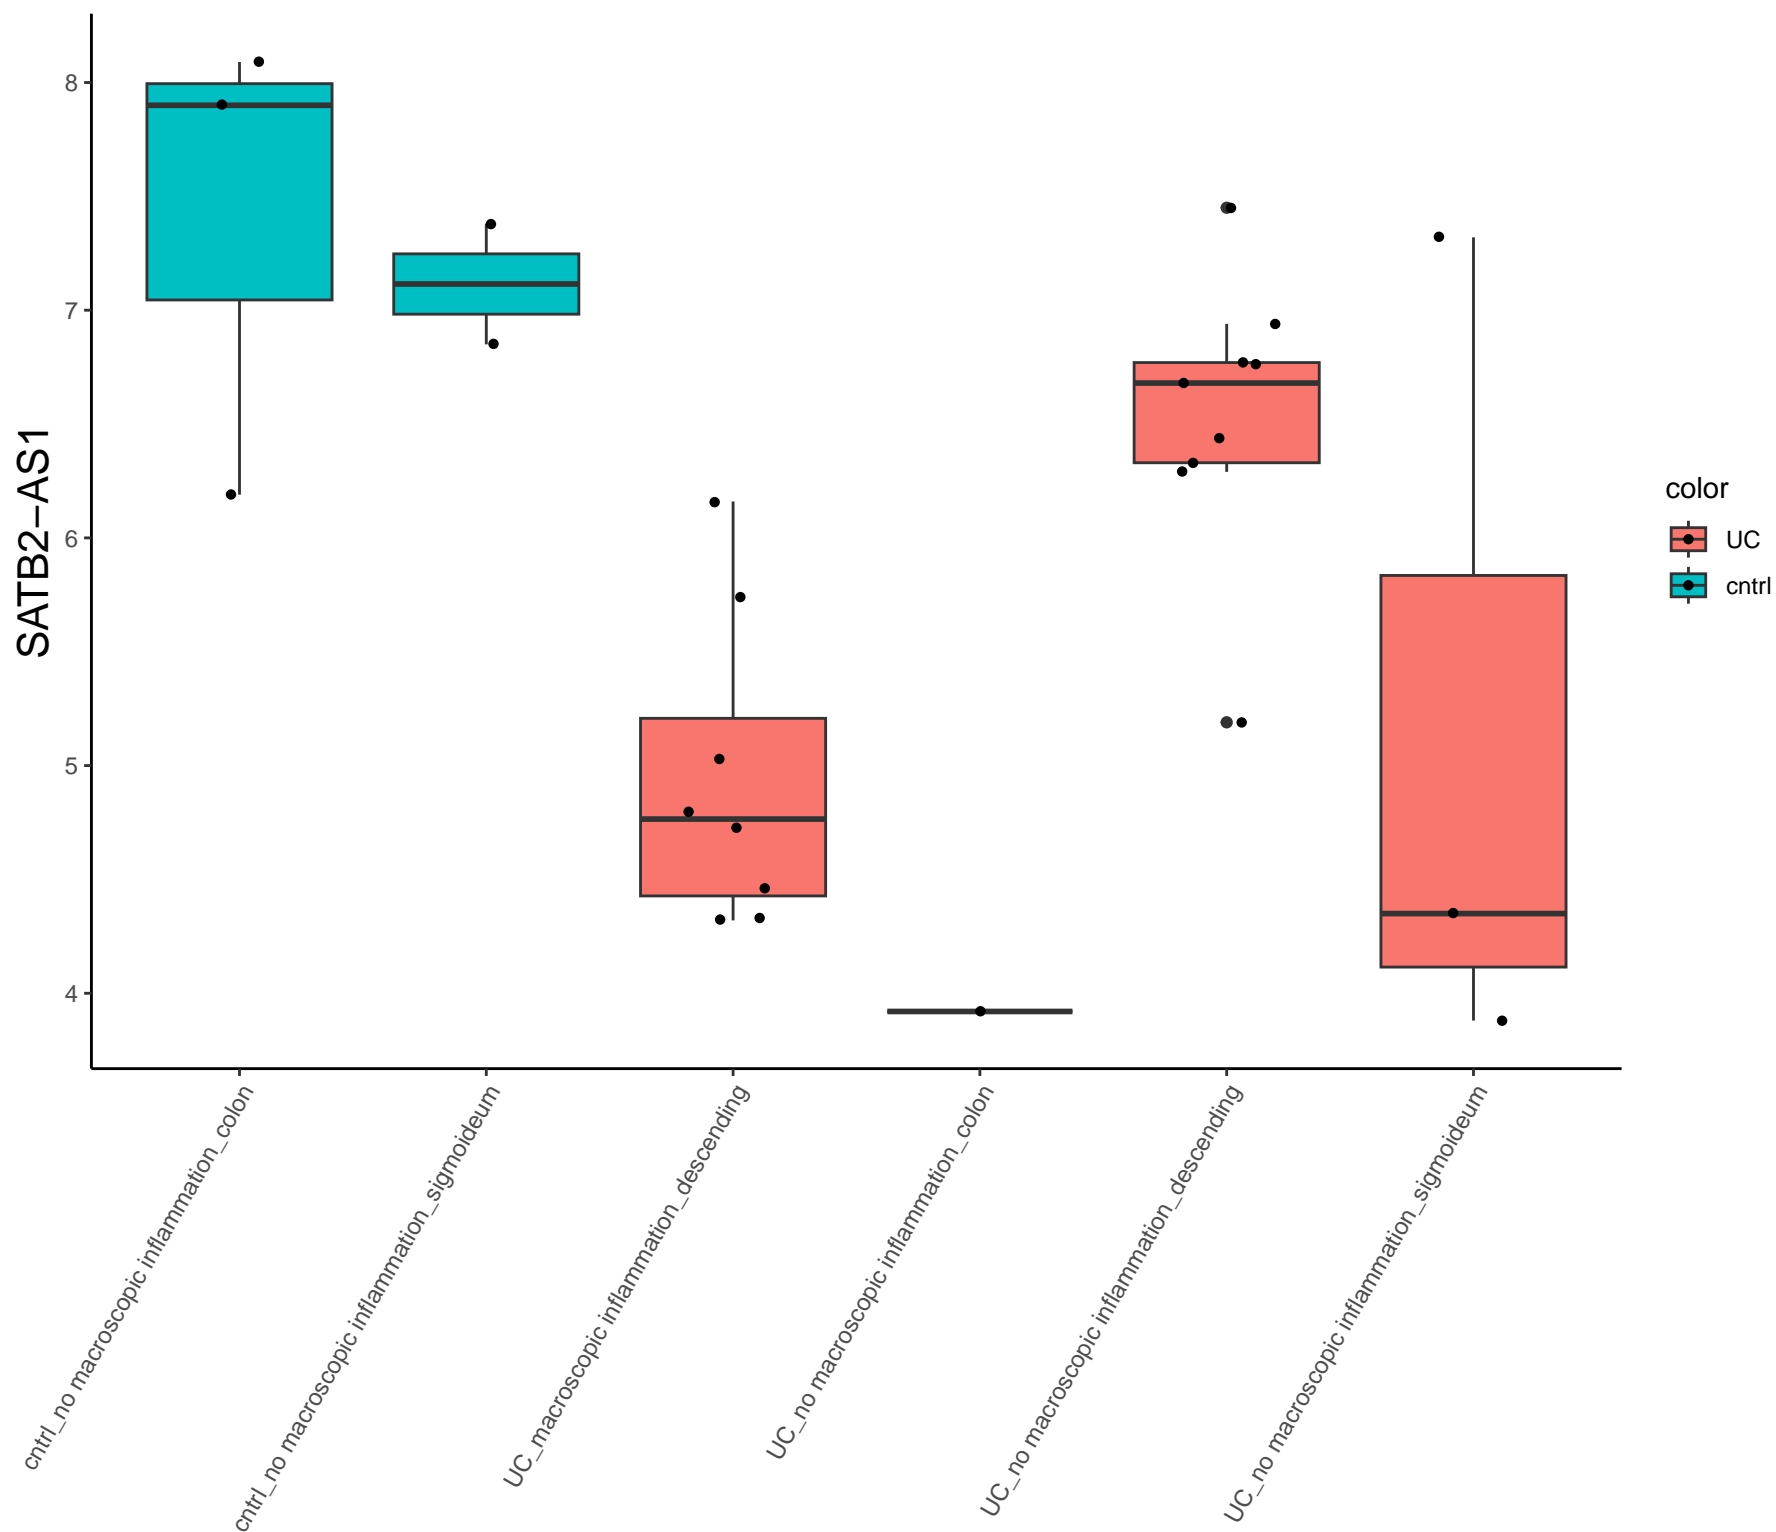



GSE107499

TP53TG1

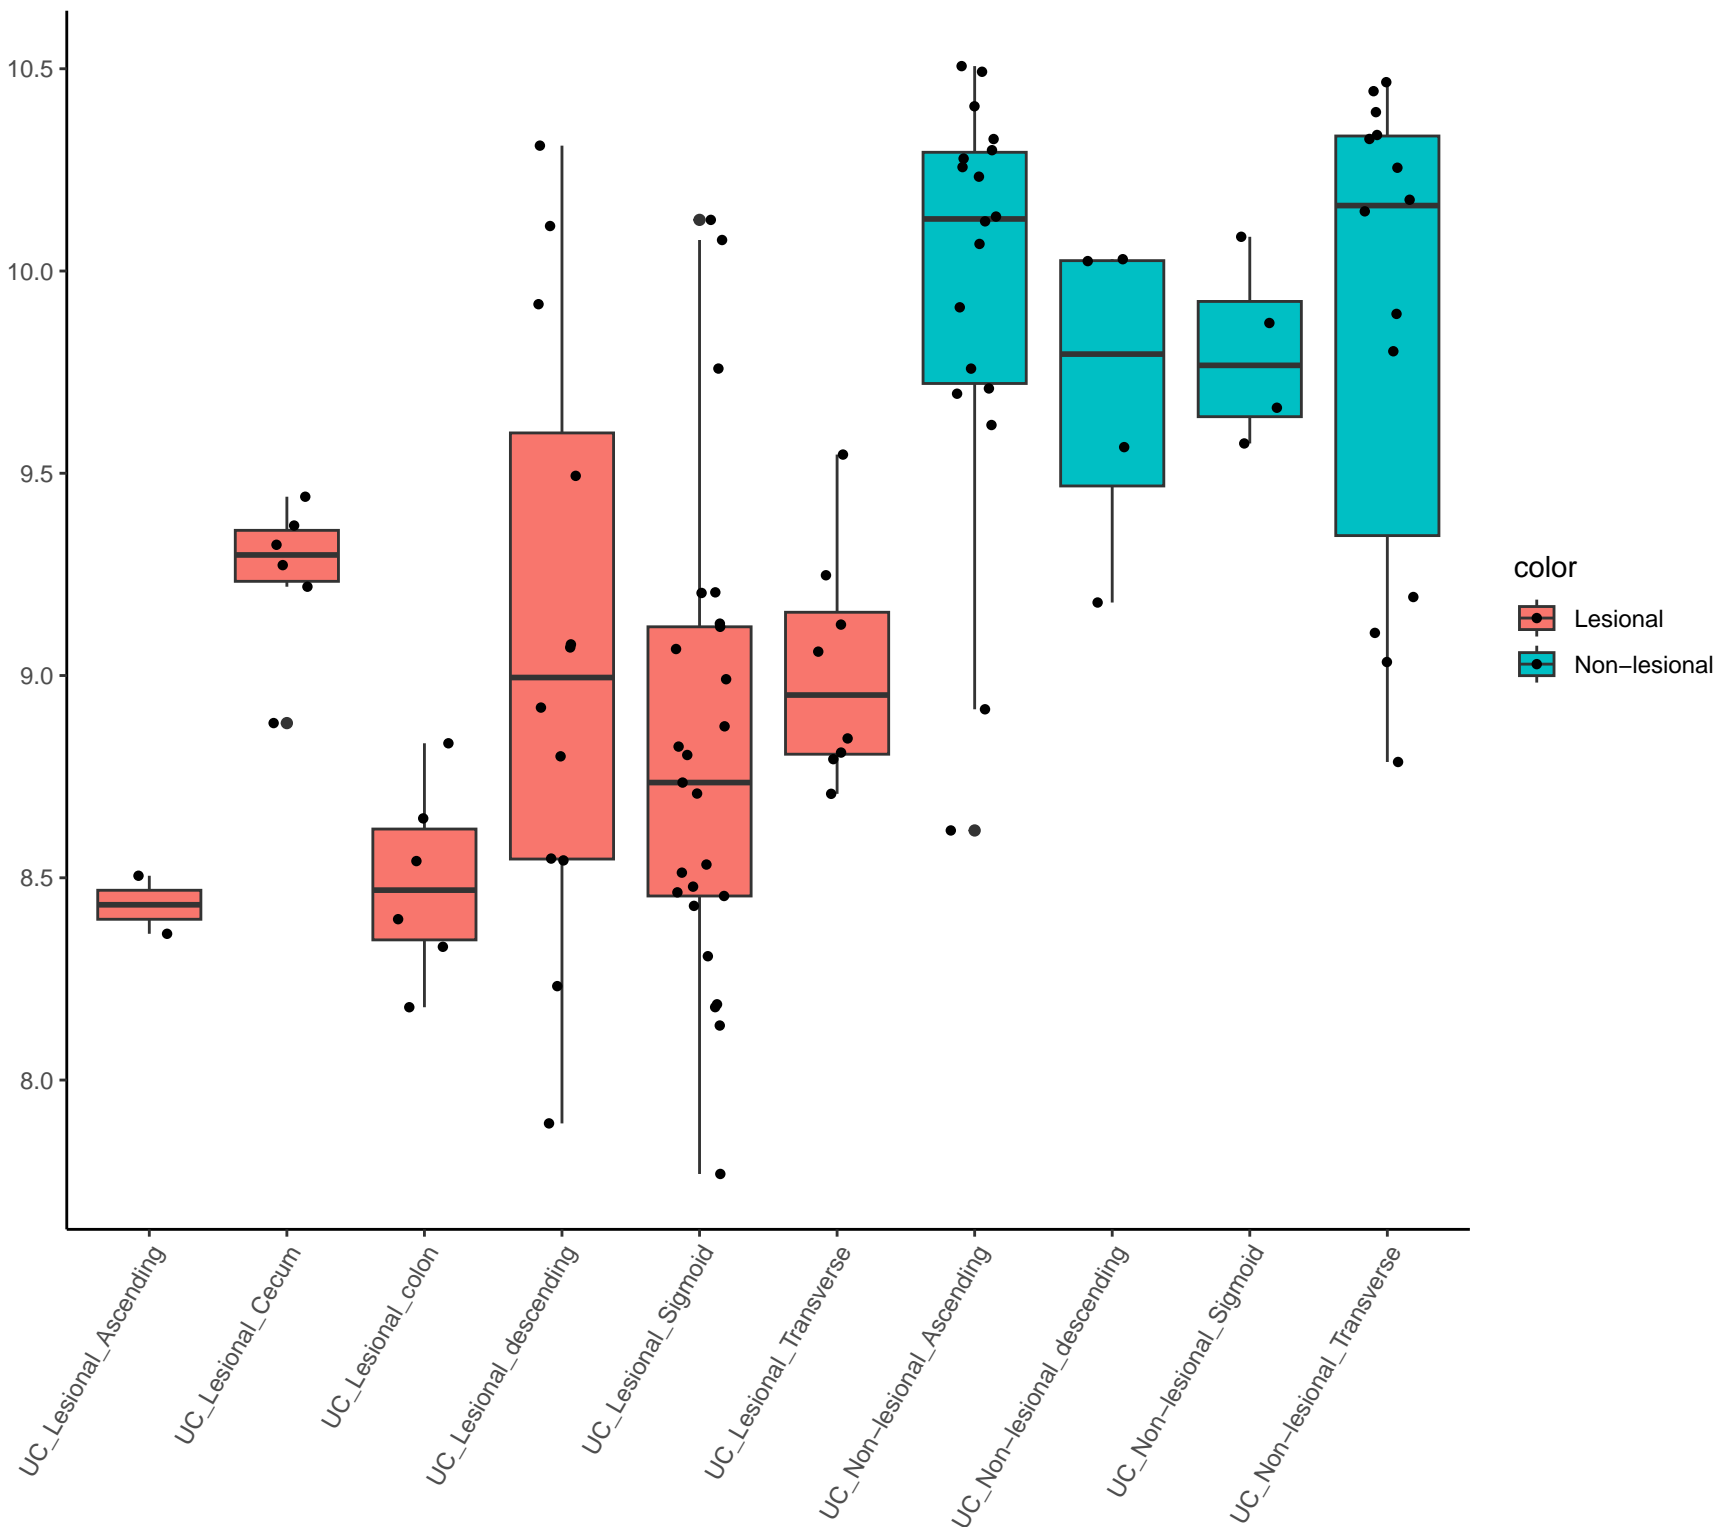

GSE128682

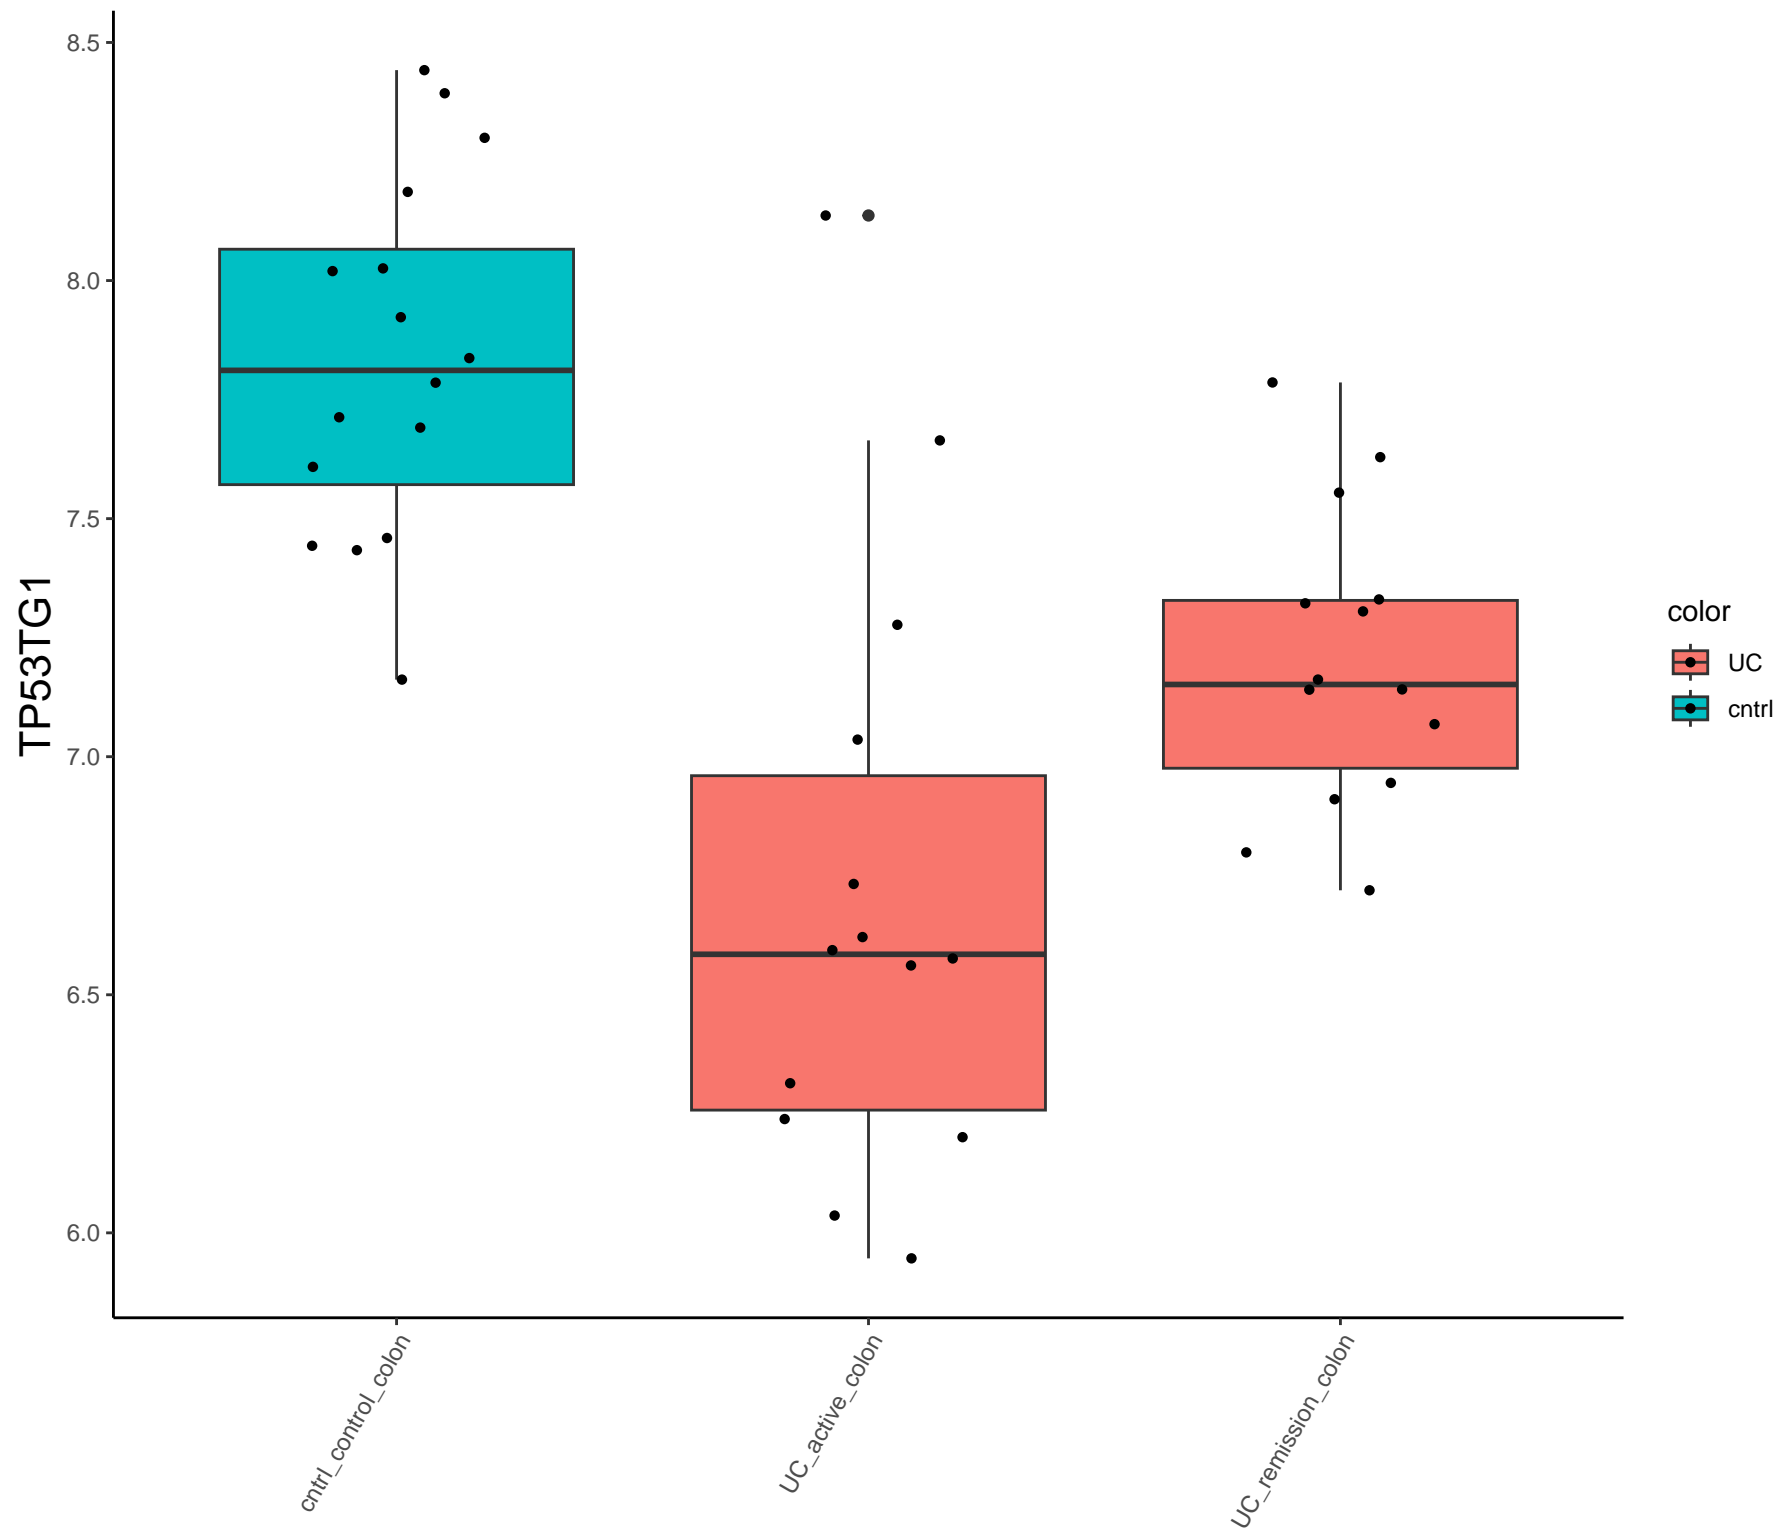

GSE38713

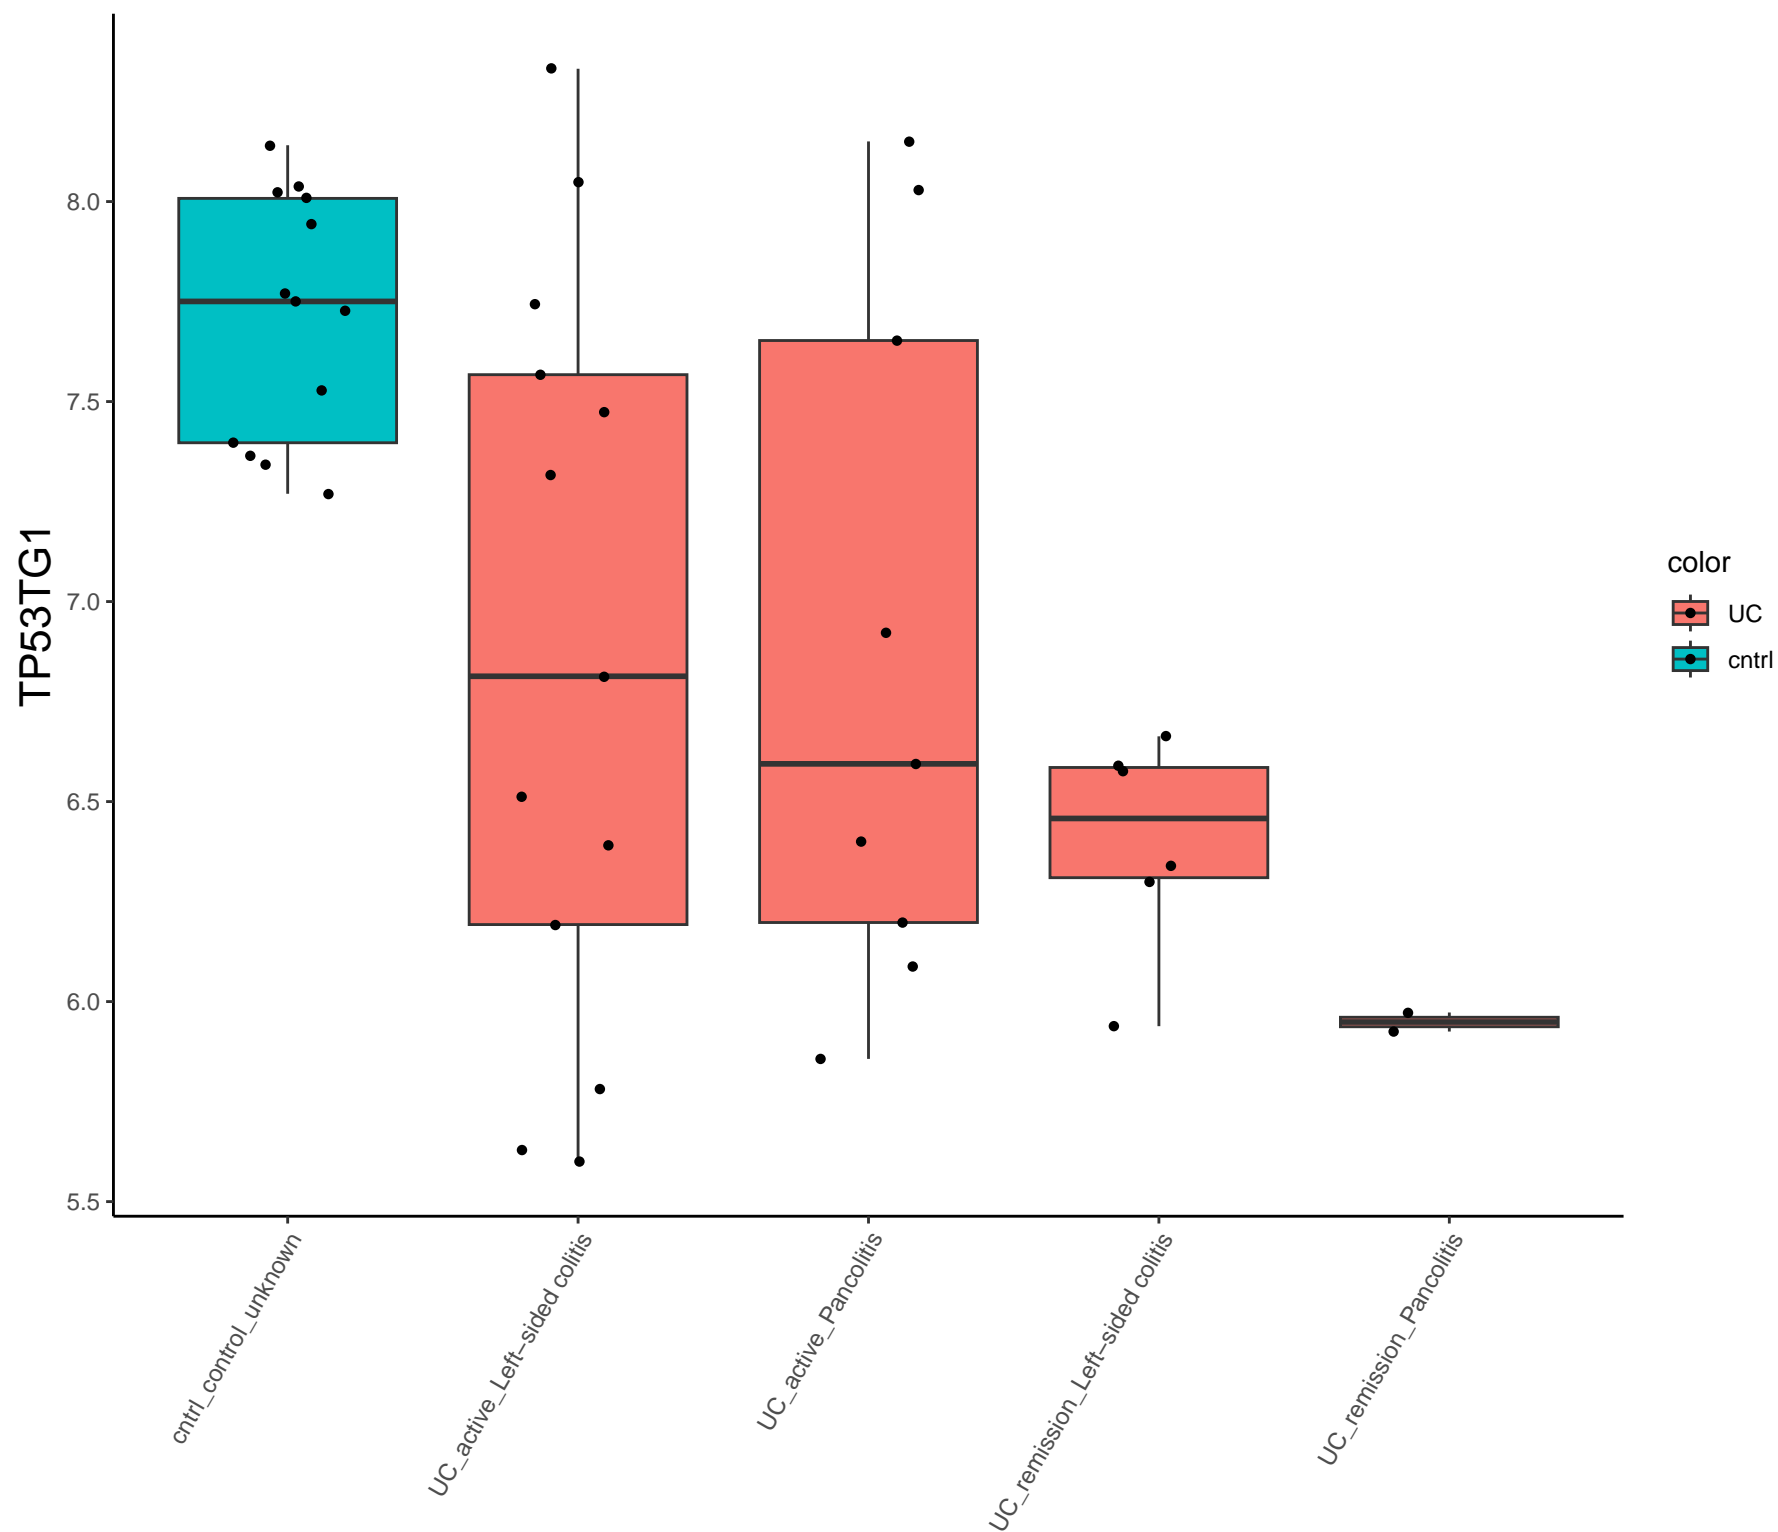

GSE48634

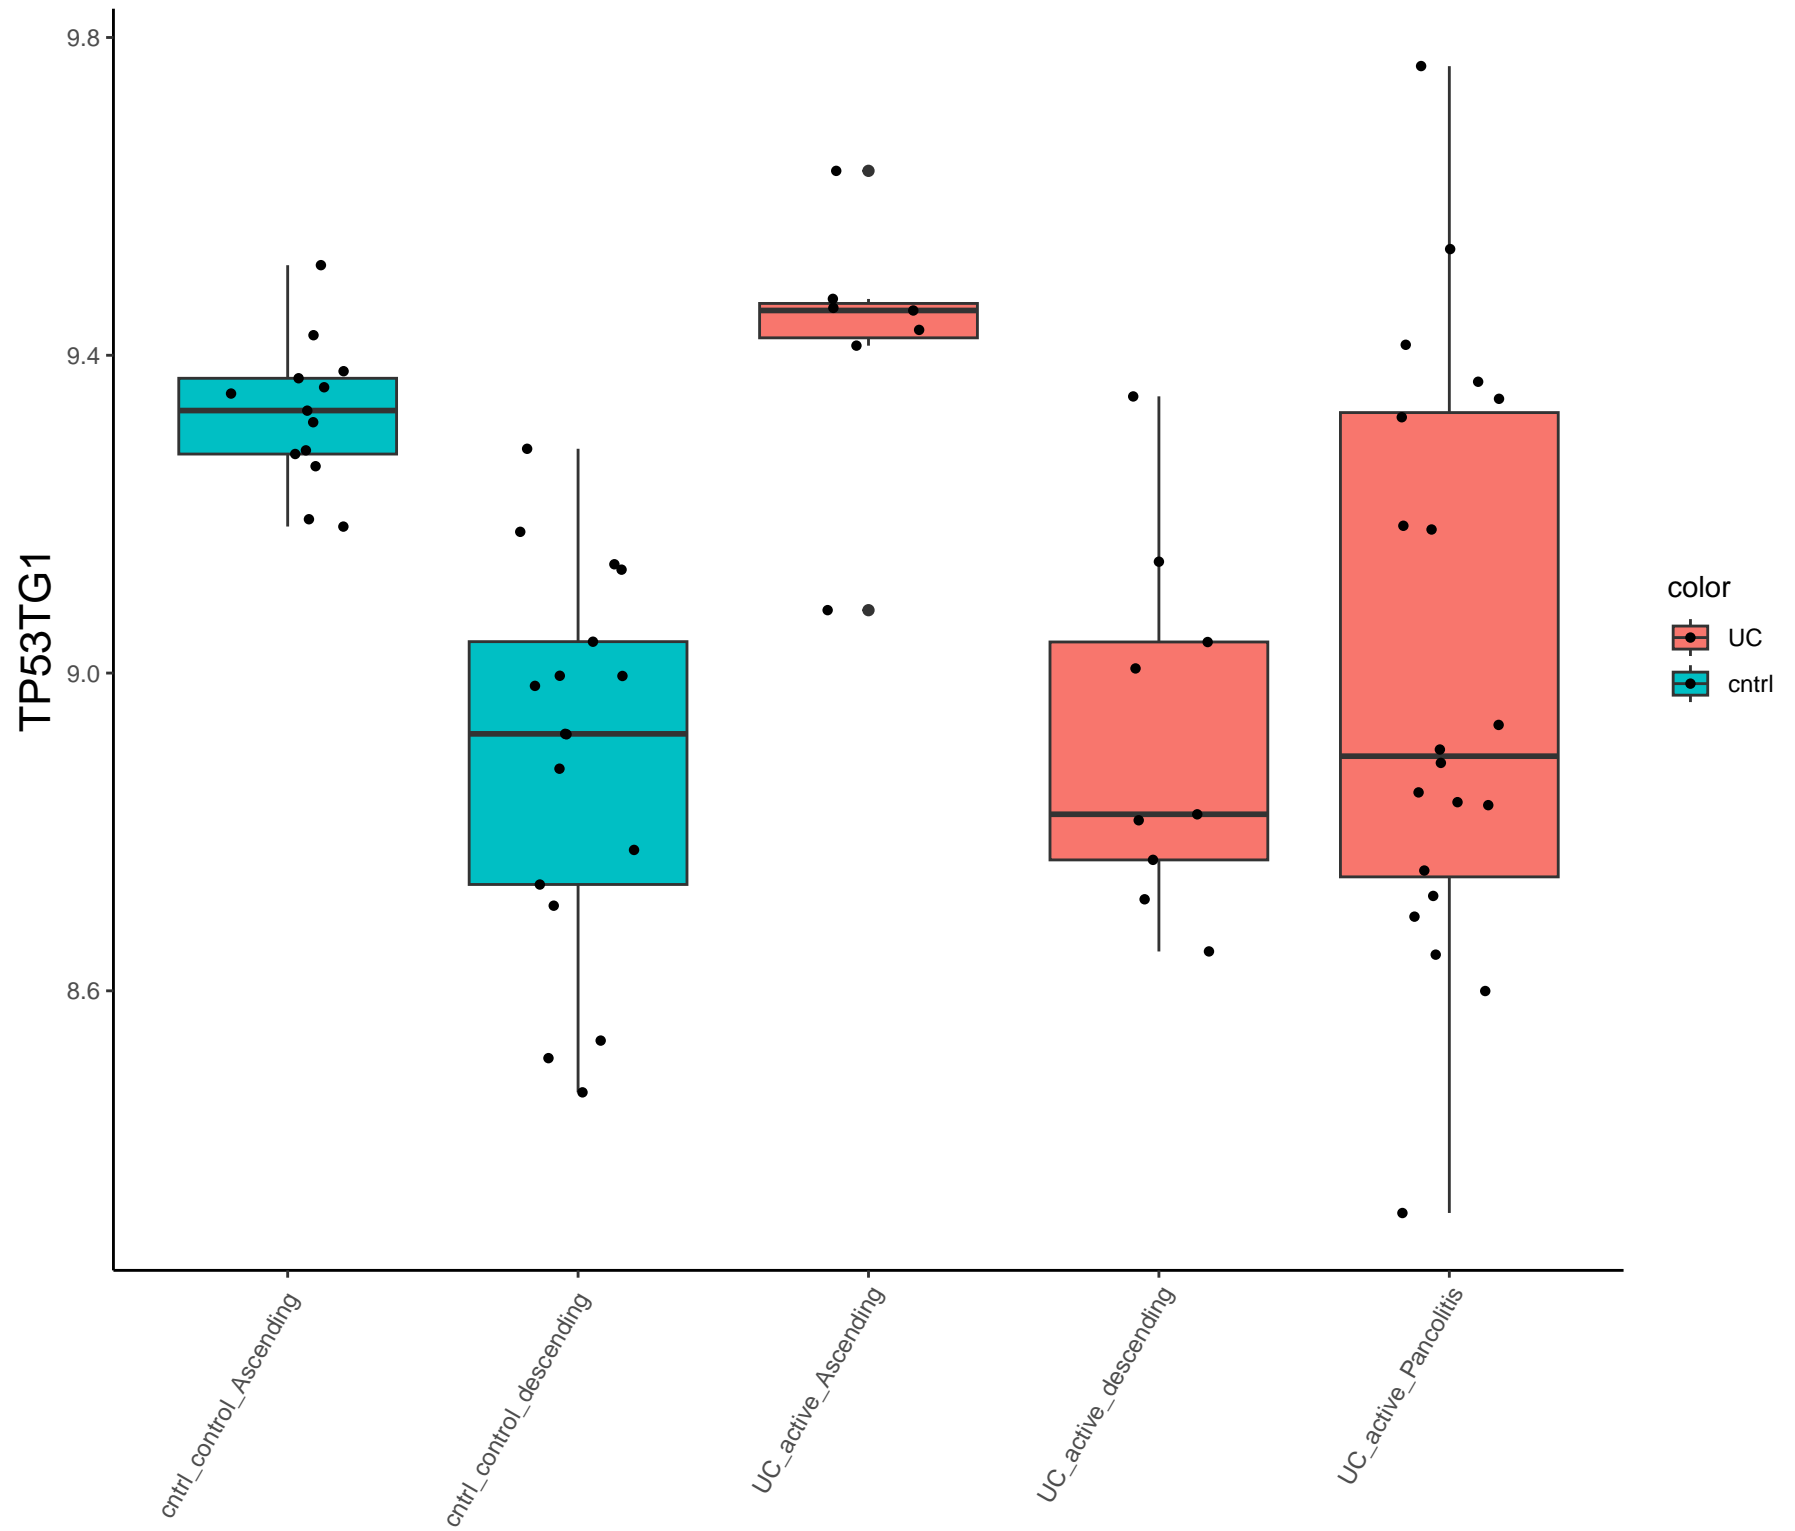

GSE48958

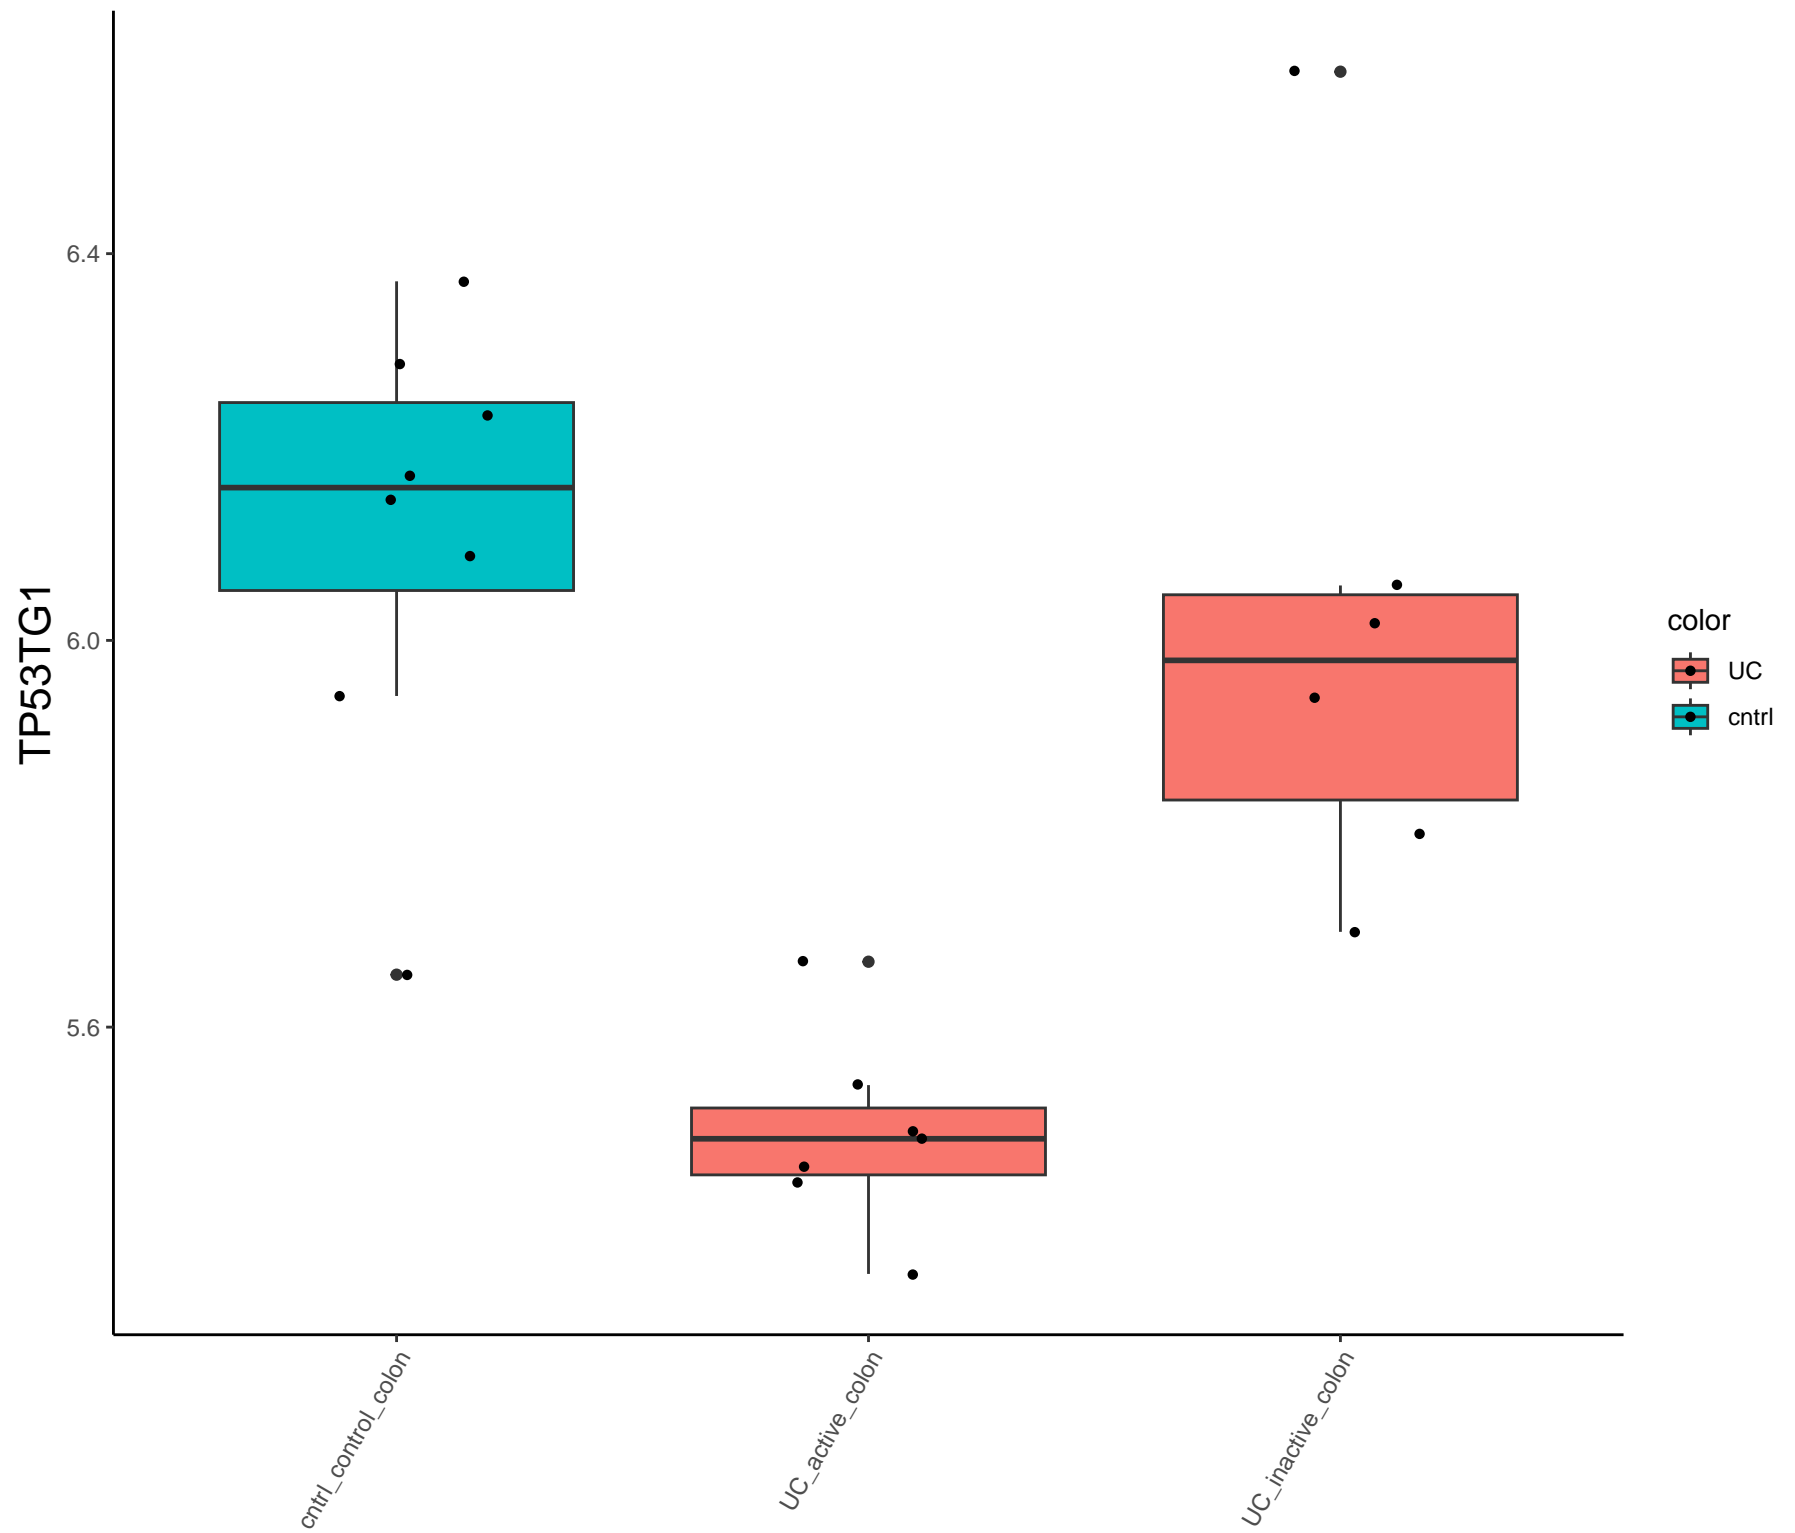

GSE59071

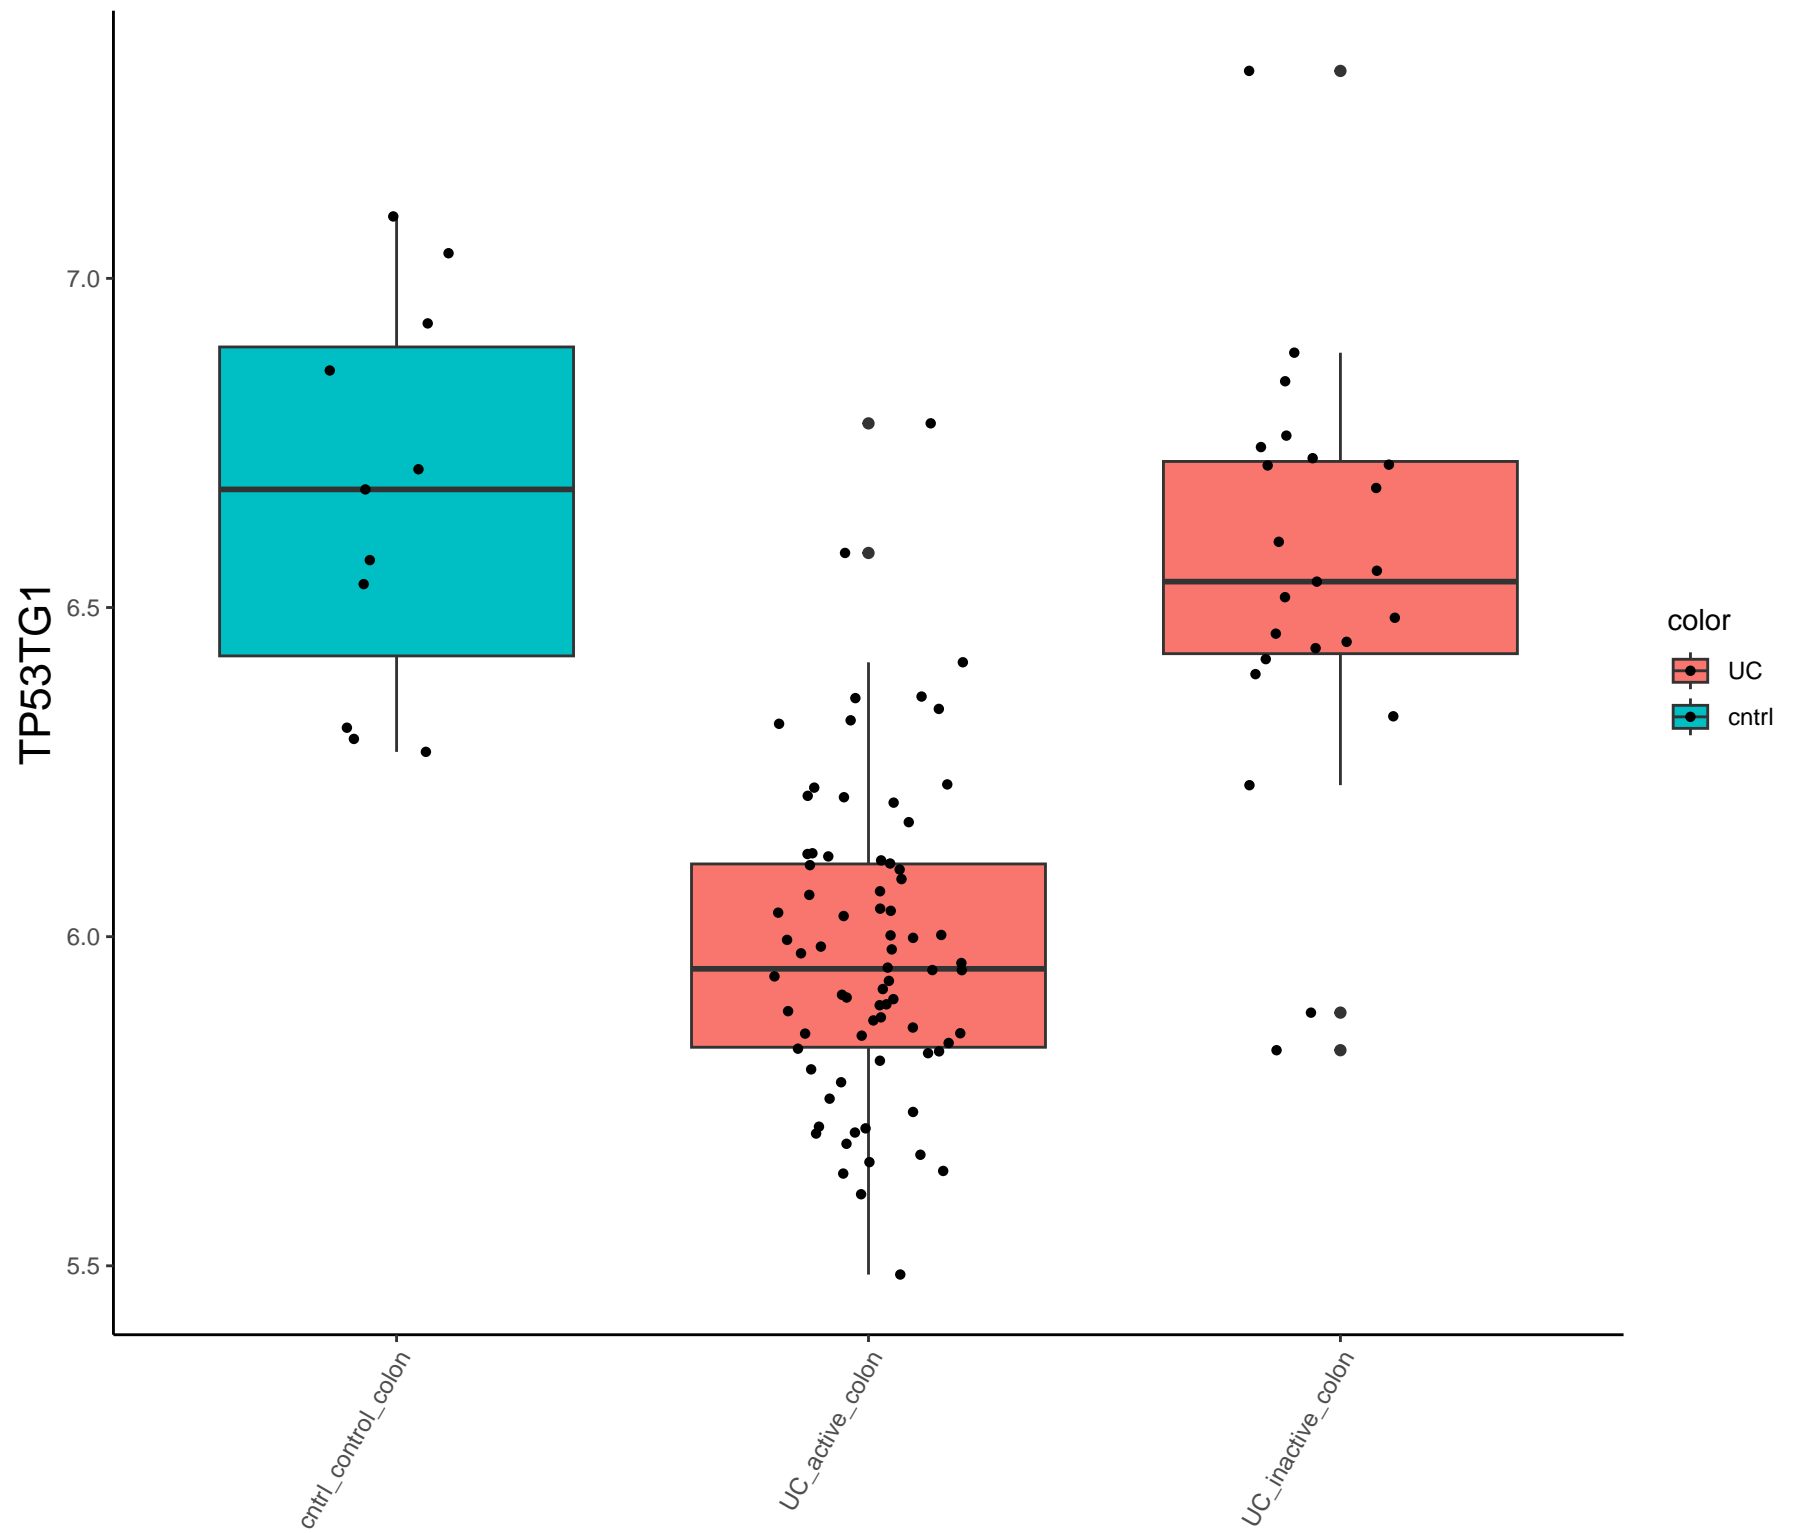

GSE9452

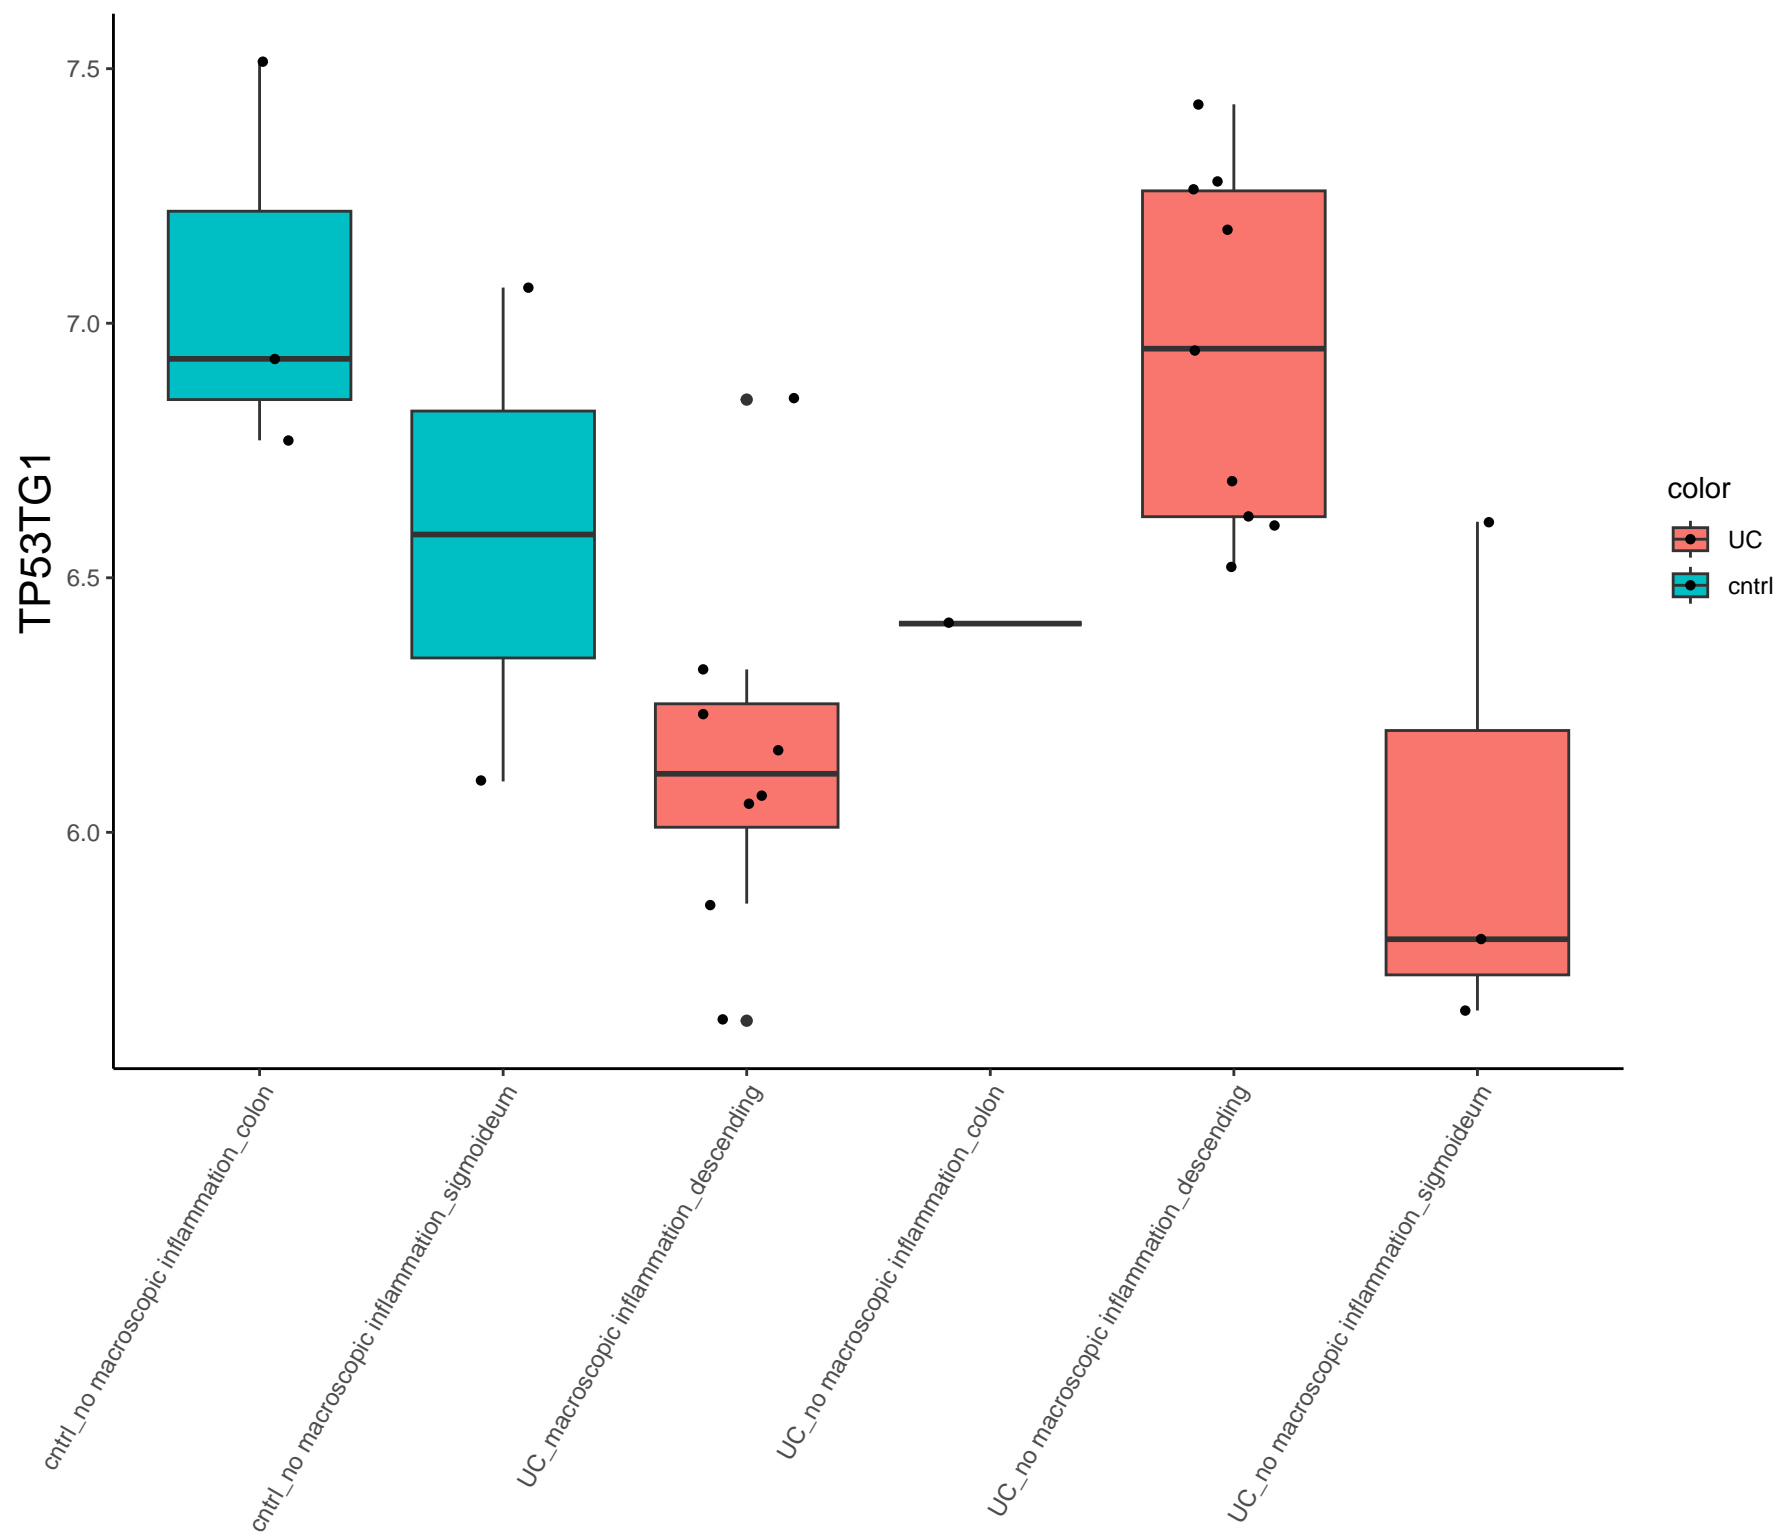

GSE128682

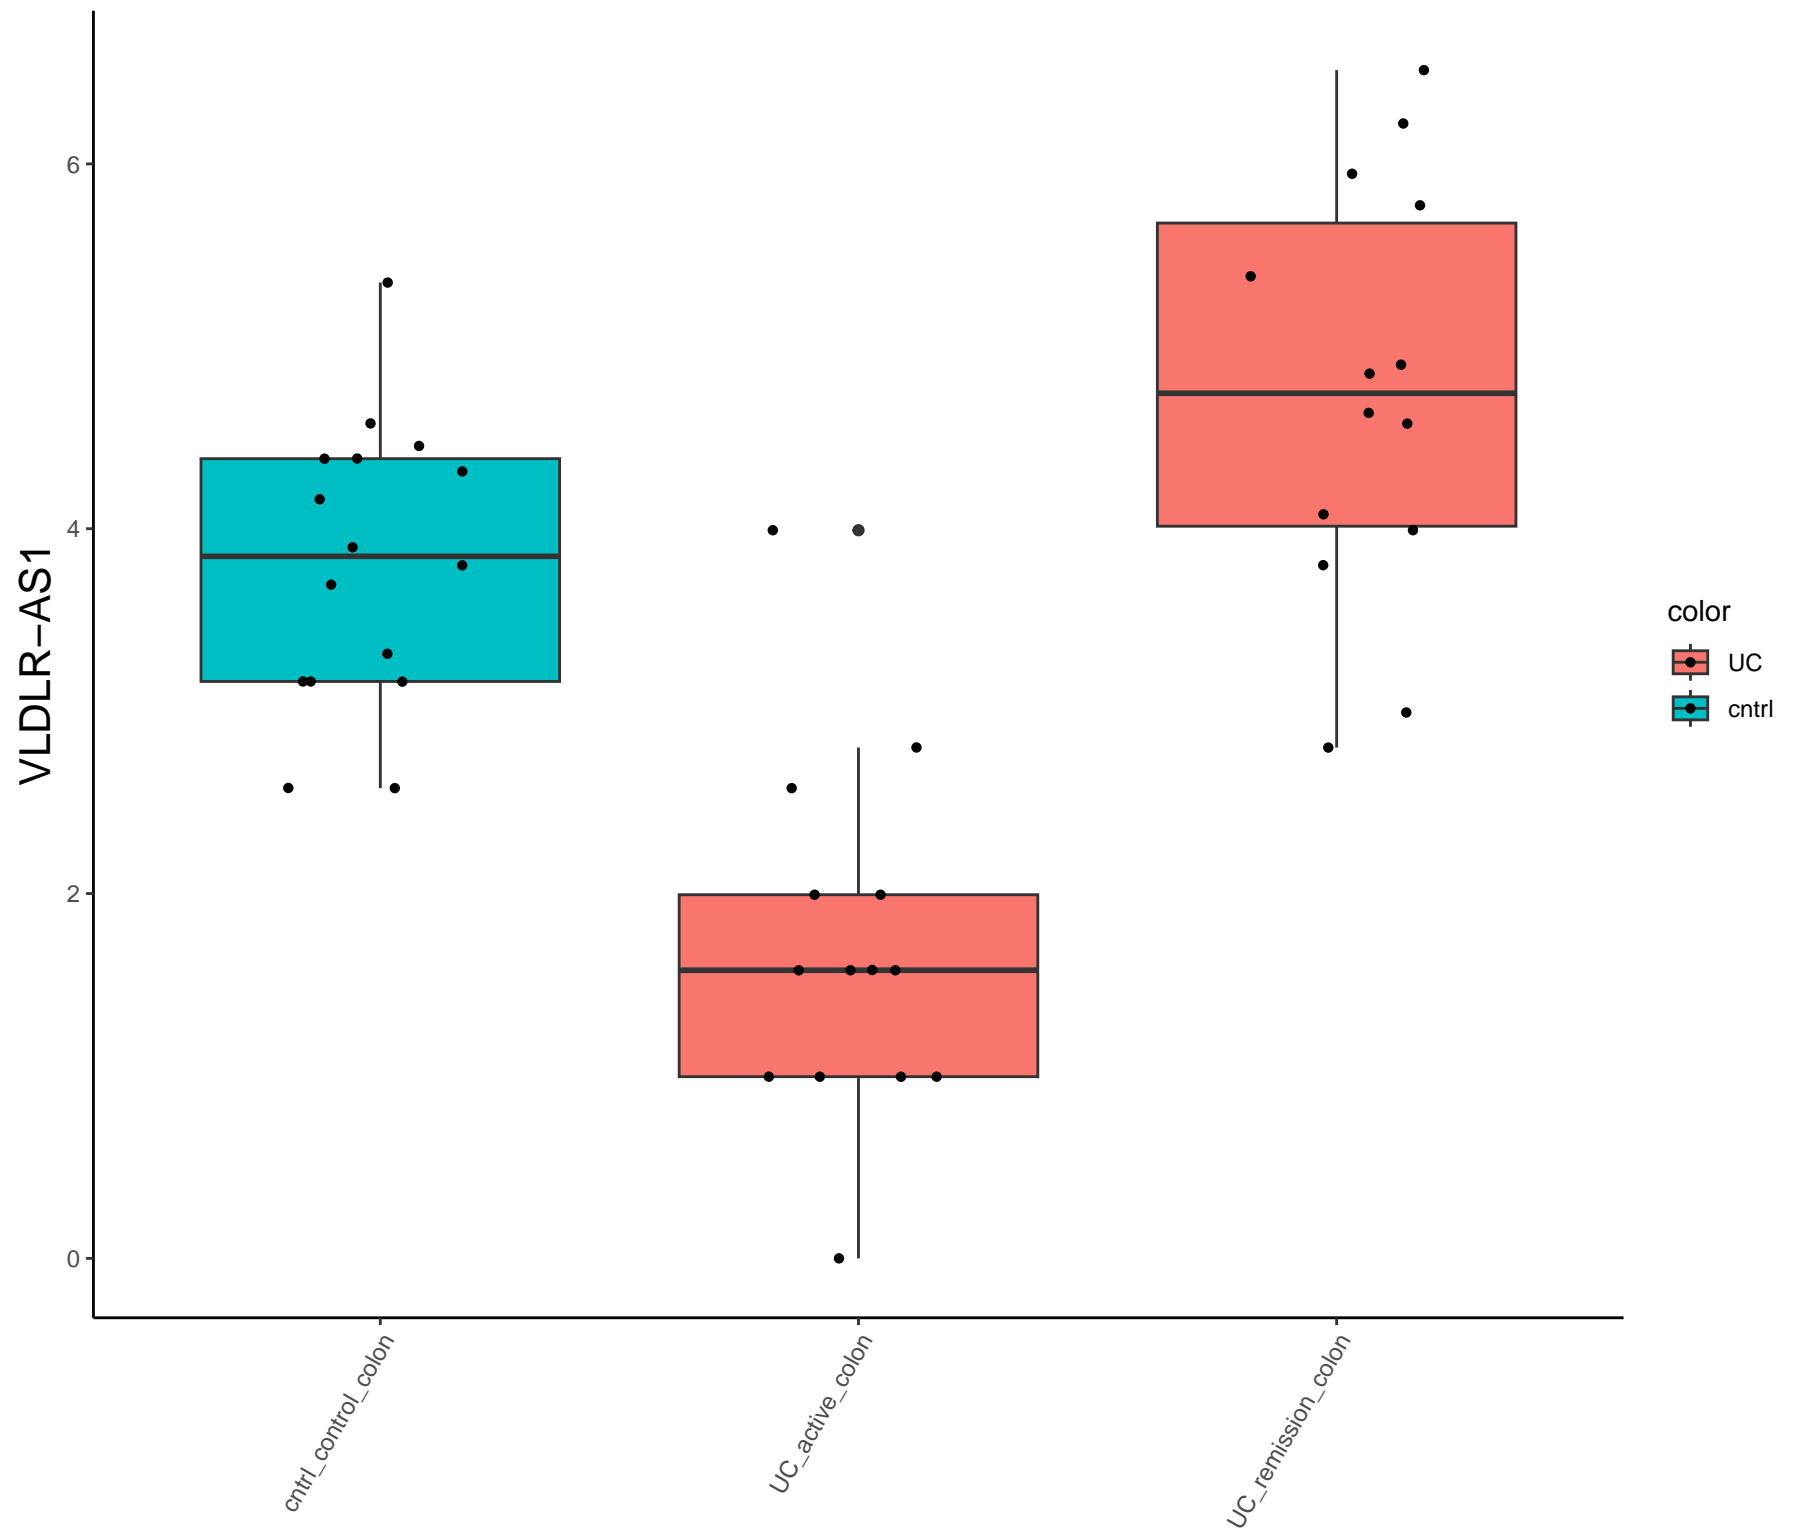



GSE48634

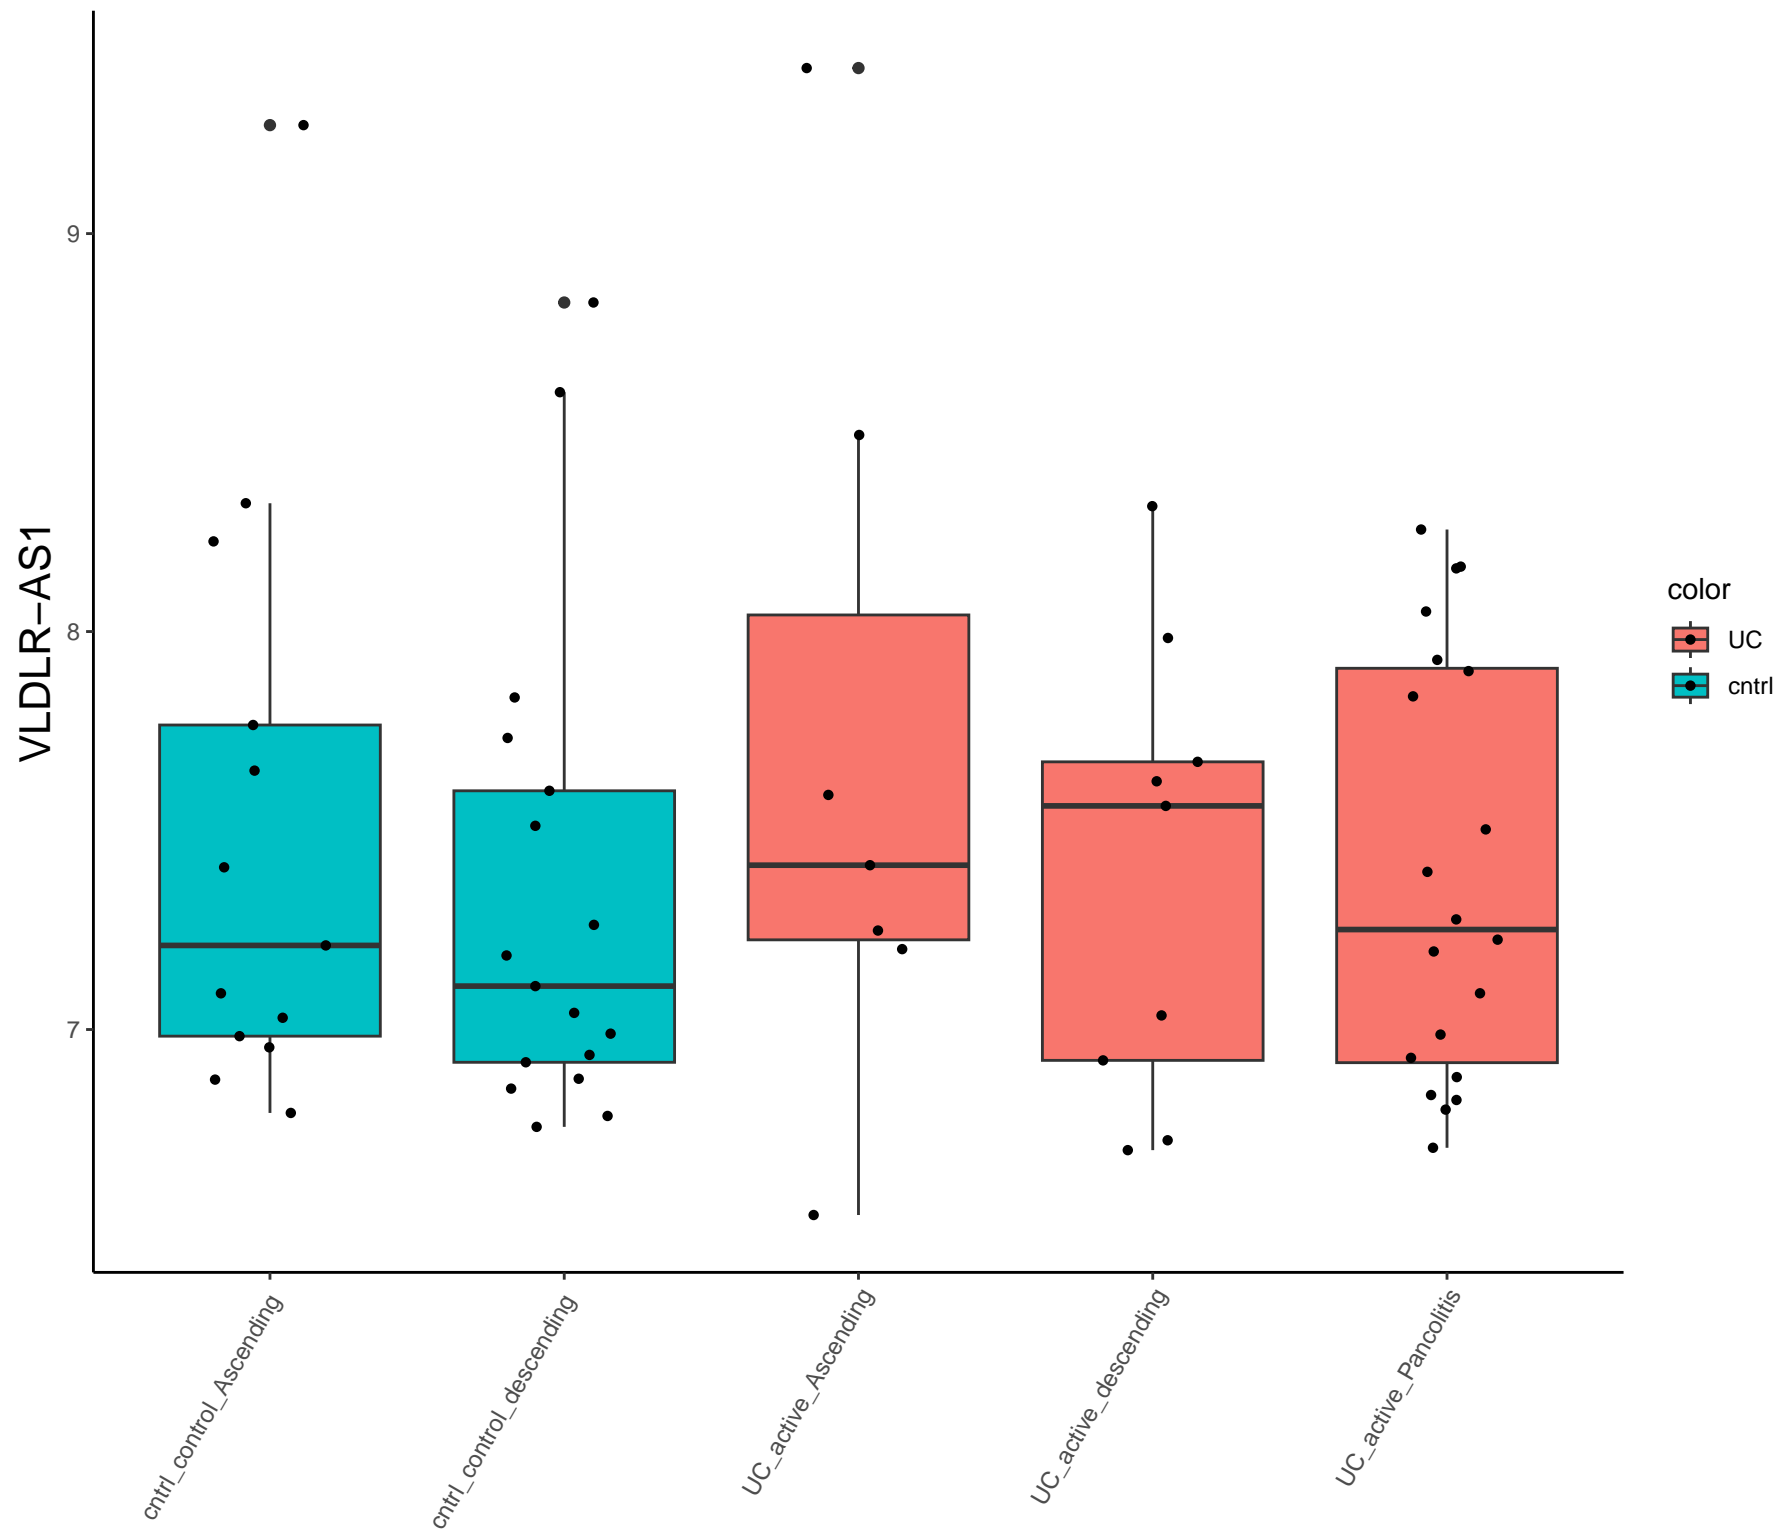

GSE48958

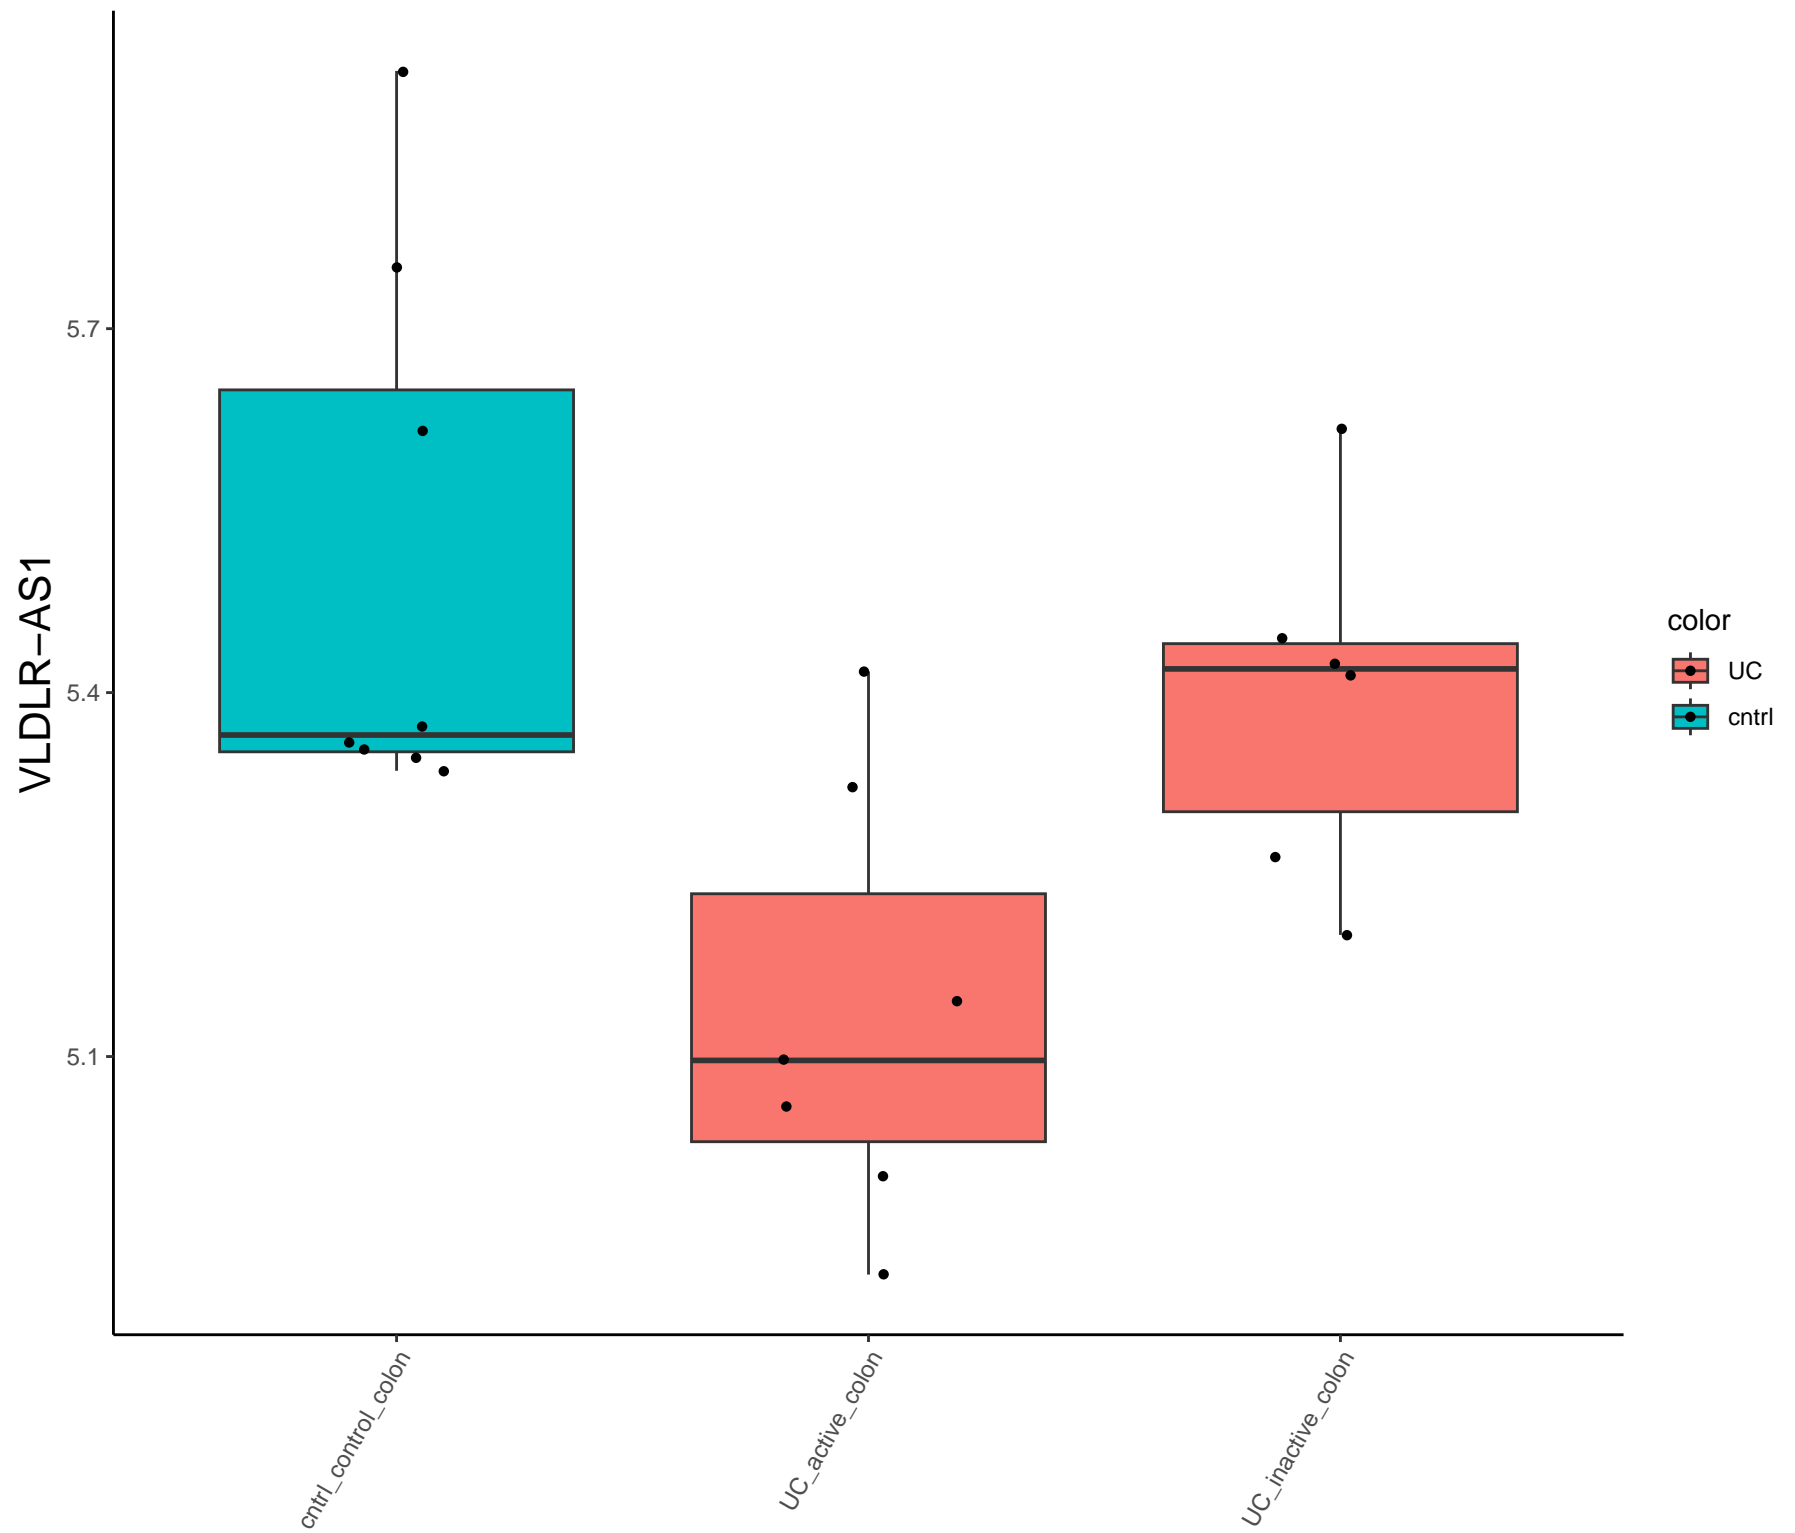

GSE59071

VLDLR-AS1

6.0

5.6

5.2

cntrl\_control\_colon

UC\_active\_colon

UC\_inactive\_colon

color

UC  
cntrl

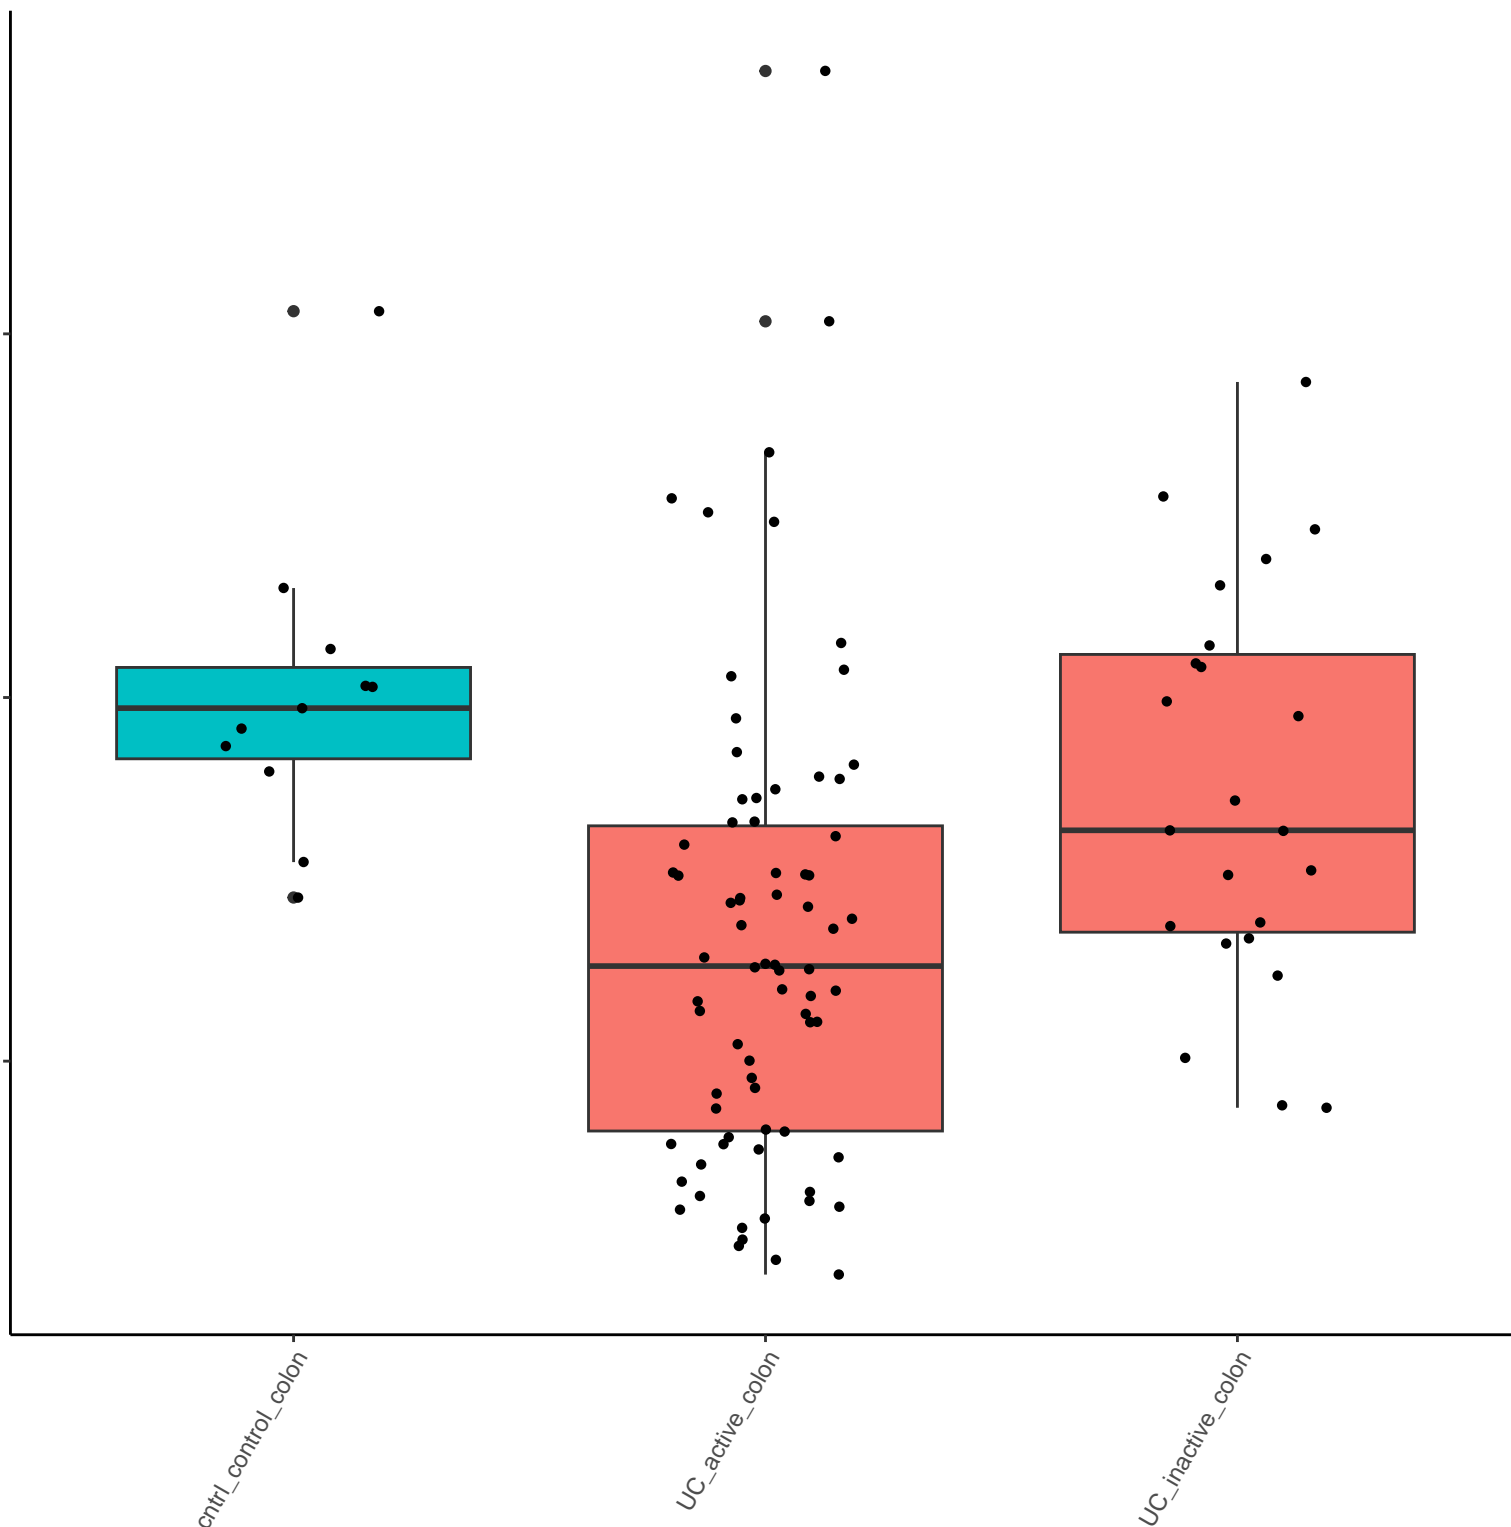

GSE9452

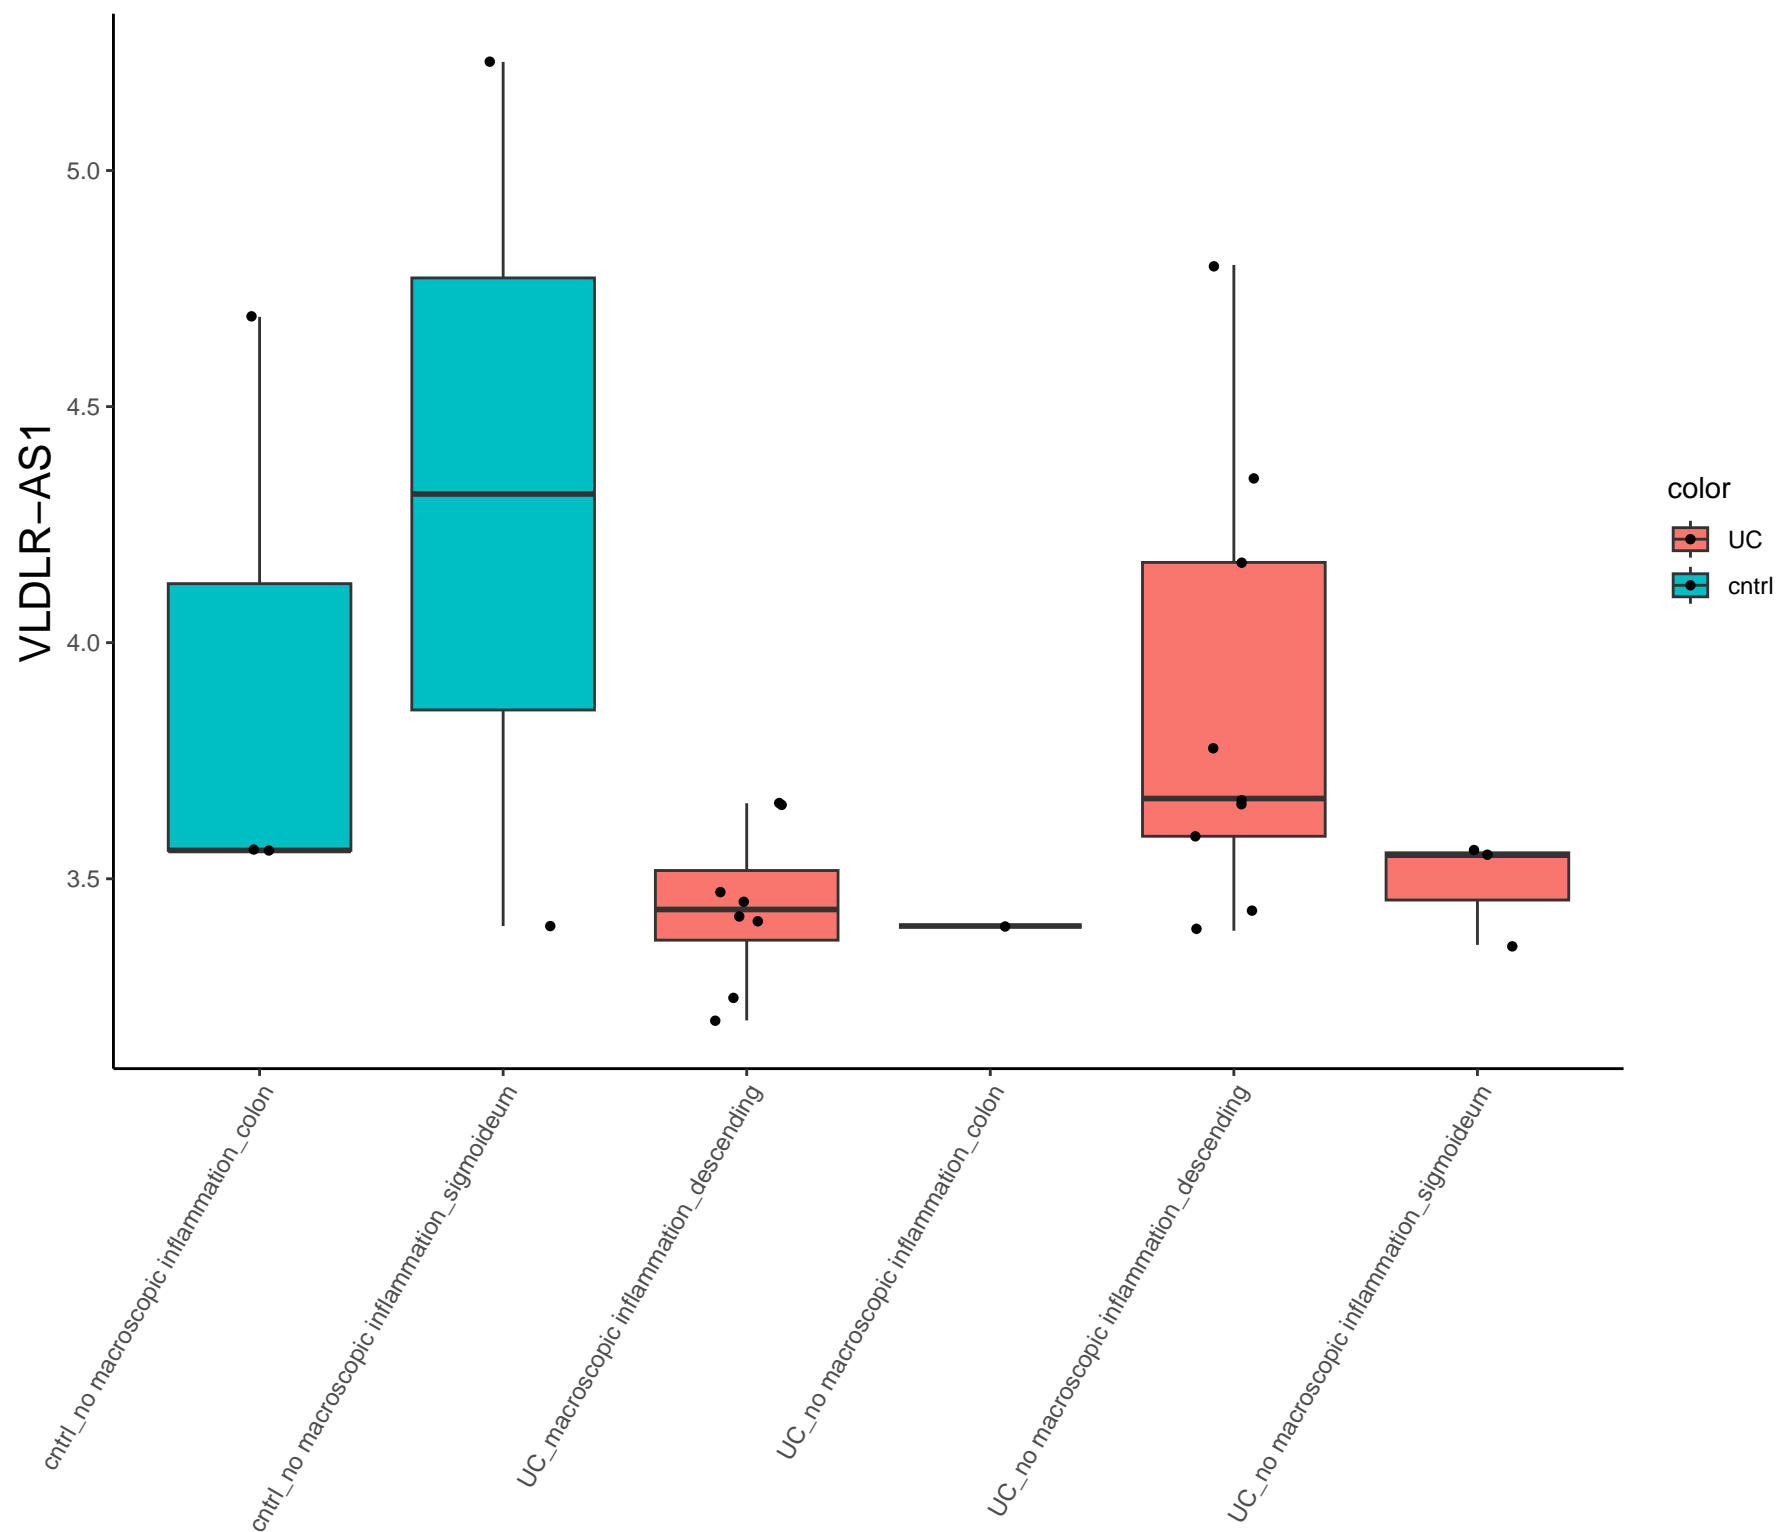

Supplement: s1 [file s1]
